# Supplementary material for: Dynamics of transcriptional programs and chromatin accessibility in mouse spermatogonial cells from early postnatal to adult life
Source: bioRxiv preprint, doi:10.1101/2020.08.20.259374, version 3 (2024-05-29)
Supplement: Table S1 [file 259374_file07.xls]

## Sheet: Index
Index
CPM _values
DGE_analysis_PND15_vs_PND8_all
DGE_analysis_Adult_PND15_all
DGE_analysis_PND15_vs_PND8_down
DGE_analysis_PND15_vs_PND8_up
DGE_analysis_Adult_PND15_down
DGE_analysis_Adult_PND15_up
DGE_specific_and_shared
Expression_germ_cell_markers
DGE_histones_adult_vs_pnd15
DGE_histones_pnd15_vs_pnd8

## Sheet: CPM_values
	PND15_11_B1	PND15_12_B1	PND15_18_B2	PND15_20_B2	PND15_21_B2	PND15_22_B2	PND8_09_B1	PND8_10_B1	PND8_13_B2	PND8_14_B2	PND8_16_B2	PND8_17_B2	PNW21_01_B1	PNW21_02_B1	PNW21_03_B1	PNW21_04_B1	PNW21_05_B1	PNW21_07_B1
00R_AC107638.2	0.136648	-0.213042	-0.653935	-1.53722	-0.99121	-0.502659	-0.170377	-0.128449	-0.218189	-0.100534	-0.71874	-0.496538	-1.39837	0.27502	-2.55014	-1.72414	0.0462007	-1.75252
0610009O20Rik	3.4978	3.25177	3.27815	3.47592	3.79379	3.53911	3.22703	3.45871	3.36235	3.38323	3.43921	3.58483	3.64247	2.58382	3.40003	3.08548	3.19675	3.17582
1110020A21Rik	-1.49747	-0.818179	-1.57257	-1.0118	-1.46627	-2.08204	-1.56273	-0.887834	-1.3776	-1.04141	-0.909957	-1.22036	2.2676	2.87067	3.4369	3.74485	2.88941	4.35311
1700015F17Rik	-2.34156	-3.65041	-2.1795	-2.68663	-1.88803	-3.65041	-3.65041	-3.20507	-3.13859	-2.63594	-3.0911	-3.65041	0.544335	0.666122	2.6703	3.36542	3.0255	2.17986
1700022N22Rik	-0.422034	-0.197836	0.0883653	0.0889445	-0.801819	-0.584956	-0.526043	-0.741727	-0.218189	-0.302541	-0.0784867	-0.178576	-0.323796	-3.65041	-2.99783	-0.782197	-1.16443	0.220779
1700024J04Rik	-0.715242	-0.643213	-0.967097	-0.679003	-0.801819	-0.486748	-0.379165	-0.628203	-0.798939	-0.728206	-0.427795	-1.09658	1.44846	0.283977	0.0764492	1.52547	2.3569	-2.90052
1700028P14Rik	-2.6613	-3.65041	-3.65041	-3.08949	-3.65041	-1.6691	-3.65041	-3.65041	-3.65041	-3.65041	-3.65041	-3.65041	0.0548351	0.133529	0.620357	1.86722	2.4215	-3.65041
1700067P10Rik	-3.65041	-3.65041	-3.65041	-3.65041	-3.65041	-3.65041	-3.65041	-3.65041	-3.65041	-3.65041	-3.65041	-3.65041	-1.6465	-0.199422	-3.65041	-2.88472	0.695054	-3.65041
1700086O06Rik	-0.146803	-0.415081	0.400251	0.235267	-0.0042719	0.144029	0.238592	0.734303	0.771865	0.376602	0.249042	0.869735	1.08252	-1.54207	-1.5025	-2.01789	1.36281	-3.65041
1810049J17Rik	-1.34595	-1.07173	-0.164696	-3.08949	-2.73497	-0.584956	-0.526043	-0.609065	-0.162369	-0.625183	-1.25477	-3.12543	-3.65041	-3.65041	-3.65041	-2.38716	-3.65041	-3.65041
1810055G02Rik	4.92397	4.88182	4.80311	4.64496	4.92717	4.74255	4.75155	4.87761	4.83627	4.85606	4.73089	4.74332	4.40462	4.5038	4.42242	4.38393	3.61441	4.0889
2010003K11Rik	-2.07999	-1.77138	-1.10626	-0.545513	-1.96544	-3.65041	-1.86885	-1.83017	-2.21564	-2.63594	-1.89859	-3.12543	-0.0309192	-3.65041	-3.65041	0.44586	-3.65041	-3.65041
2010015M23Rik	2.05606	1.72659	2.2709	1.64087	1.8285	1.99754	1.98649	1.5081	1.46581	1.77517	2.04221	1.47045	2.15754	2.29243	2.6703	3.00959	1.32109	2.60366
2010110K18Rik	-0.582226	-0.0494359	-0.550925	-0.394341	0.0606197	-1.08623	-0.397496	-0.475977	-0.212509	-0.384321	-0.464862	0.0818081	-1.18672	-3.65041	-3.65041	-3.65041	-0.286355	-3.65041
2310039H08Rik	1.92809	2.01462	1.85953	1.58191	1.51961	1.3027	2.40311	2.43496	2.20915	2.03603	2.05405	2.07183	1.4421	-1.25584	0.892282	0.44586	0.406802	1.71481
2410015M20Rik	4.20433	4.20101	4.2754	4.44641	4.16461	4.35814	4.49006	4.58047	4.59038	4.59261	4.65733	4.39348	4.2034	3.80563	5.17797	5.06283	4.84499	5.27138
2700016F22Rik	-0.0382353	-0.563094	0.0169959	-0.257519	0.0260411	-0.130961	0.0620296	-0.142139	-0.0619142	-0.0818061	-0.0958259	0.260819	-0.323796	1.13071	1.18019	-0.782197	-0.0600335	-3.65041
2700046G09Rik	-0.68764	-0.00906394	0.145256	-0.257519	0.182253	-0.424803	0.15301	0.293777	-0.162369	-0.818338	-0.0784867	-0.646342	-0.122095	-3.09152	1.15089	1.06144	0.237739	1.78467
2700062C07Rik	2.47778	2.39494	2.67031	2.2774	2.73175	2.33624	2.81492	2.54584	2.75714	2.6354	2.62094	2.38345	1.34332	2.68872	1.76758	2.51385	1.96024	3.12286
2810403A07Rik	5.73905	5.78731	5.75838	5.68572	5.75305	5.90585	5.88285	5.83329	5.81257	5.78561	5.74292	5.83762	5.53301	5.91387	5.71698	5.98199	5.47572	5.66781
3100002H09Rik	0.498869	0.271458	-0.310088	-0.132555	-1.09613	-0.350935	-0.594883	-0.812932	-0.218189	-1.3054	-0.811183	-0.122604	-0.838592	-0.911079	-0.47926	-0.417421	-3.65041	-0.0767101
3110021N24Rik	1.16138	1.38499	1.00283	1.27857	1.28908	1.7346	0.991908	1.23735	1.23378	0.962159	0.918303	1.47045	0.712094	1.61178	1.39532	-0.52907	1.36281	1.205
3110070M22Rik	-0.348149	-0.982171	-1.10626	0.235267	-0.634431	-1.6691	-1.56273	-0.741727	-1.14342	-2.31113	-1.89859	-2.43832	-1.00218	0.595928	2.10964	2.01386	2.9454	3.41487
3110082I17Rik	4.82164	4.68858	4.39194	4.73074	4.1807	4.32105	4.70666	4.76094	4.50525	4.57771	4.66507	4.66159	4.11483	4.52024	3.88368	3.55188	3.75499	3.31925
4732491K20Rik	0.0842393	0.23083	0.35273	-0.199942	0.47007	-0.424803	0.157203	-0.271572	-0.336761	-0.454861	-0.909957	0.34263	0.212418	0.666122	-0.78415	0.187874	-2.14408	0.522853
4831440E17Rik	0.788153	0.653213	0.765806	0.409801	0.432844	0.940358	0.157203	0.30054	0.45243	0.42105	0.134753	0.0333558	1.92454	1.44211	1.68824	1.845	-0.174717	1.37467
4921501E09Rik	-3.65041	-3.65041	-3.65041	-3.65041	-3.65041	-3.07372	-3.15847	-3.65041	-3.65041	-3.65041	-3.0911	-3.65041	0.998443	-0.0796955	2.03143	0.55939	0.935193	-3.65041
4921524L21Rik	-3.65041	-3.65041	-3.03033	-1.25072	-3.12127	-2.66284	-3.65041	-3.65041	-3.65041	-3.65041	-3.65041	-3.65041	-1.6465	-0.551092	1.56038	0.0392277	0.0462007	1.73847
4930426L09Rik	-2.6613	-1.26949	-1.57257	-1.70508	-1.96544	-2.66284	-1.43102	-1.44368	-1.25577	-1.45804	-1.01599	-0.569496	-3.65041	-2.11808	0.28499	-1.72414	-1.73919	-3.65041
4930455D15Rik	-0.86178	-0.357627	-1.57257	-1.38687	-1.33206	-2.34341	-1.43102	-1.83017	-0.607872	-1.82243	-0.262037	-1.97479	-1.00218	-0.911079	-2.20897	-1.35146	-3.65041	-3.65041
4930465K10Rik	-1.20885	-1.07173	-0.653935	-1.0118	-0.414942	-0.149629	-1.86885	-1.33487	-0.850939	-1.62876	-1.89859	-0.569496	-1.94636	-3.65041	-0.390442	1.02237	1.23386	-0.451914
4930480K23Rik	0.373449	0.271458	0.840056	0.637442	0.668871	0.647807	0.941752	0.603689	0.177535	0.506038	0.173864	0.662343	0.135777	1.26796	1.09046	1.24234	-0.944972	-1.10448
4930507D05Rik	-0.669527	-0.302374	-0.310088	0.489739	-0.557497	-0.0883197	-0.460338	0.231441	-0.765285	-0.625183	-1.25477	-1.78906	-3.65041	-0.399993	-0.0814637	-1.72414	-0.944972	-3.65041
4930515G13Rik	-3.0727	-3.65041	-3.65041	-3.65041	-2.43057	-3.07372	-3.15847	-3.65041	-2.76156	-3.05578	-3.65041	-2.43832	-3.65041	-2.6897	-0.0135543	-3.65041	-0.0600335	-3.65041
4930518I15Rik	-0.277865	0.596197	0.648702	0.235267	1.15606	0.781916	0.790724	0.00174721	0.30181	0.283374	0.0843246	0.976101	0.285192	0.483784	-0.0814637	2.26881	1.51856	0.522853
4930519P11Rik	0.0298542	-0.602597	-0.862444	-0.806885	-1.46627	-1.6691	-0.594883	-0.375537	-0.850939	-1.04141	-0.811183	-1.1074	-0.122095	0.666122	2.28168	1.845	3.10139	0.725906
4930552P12Rik	0.131492	1.16543	0.490838	1.18562	0.706792	0.718137	0.817461	0.830896	0.379085	0.803323	0.0320694	0.630123	1.55531	1.92974	-1.03035	0.854561	-0.754529	-0.252149
4930598A11Rik	-1.08365	-1.07173	-0.754426	-0.905709	-1.98545	-0.98218	-1.31034	-1.56137	-1.3776	-1.3054	-1.13045	-1.62454	0.712094	-1.89952	-0.675202	0.385558	1.9328	-3.65041
4931403G20Rik	-3.0727	-3.18301	-3.65041	-3.65041	-3.65041	-3.07372	-2.7923	-3.65041	-3.65041	-3.65041	-3.65041	-3.65041	3.35193	2.81768	3.52517	2.95876	3.12583	3.86533
4931409K22Rik	-1.49747	-1.49872	-0.471792	-0.627486	-0.99121	-0.672234	-0.667174	0.00174721	-0.535171	-0.164777	-0.71874	-0.360836	1.04109	1.48157	2.75061	2.82892	2.93022	2.29605
4931440J10Rik	-3.65041	-3.18301	-3.65041	-3.65041	-3.65041	-3.07372	-3.65041	-1.56137	-2.76156	-3.65041	-3.65041	-3.65041	-2.32536	-0.911079	-0.902003	0.115465	-0.586318	0.903874
4933415A04Rik	0.450002	0.829294	1.02725	0.911523	0.0409621	1.03982	0.441287	-0.22227	0.529024	0.61719	0.207237	0.294102	-1.18672	-0.0233629	1.07494	-0.264647	-1.11779	-2.45181
4933427I04Rik	-2.31317	-1.99845	-1.94765	-0.452923	-1.59876	-1.45274	-1.93872	-2.1241	-2.40997	-2.59996	-1.60583	-3.65041	1.39356	2.1661	3.5467	3.46057	3.37244	2.6292
5031415H12Rik	-1.01343	-1.081	-0.341011	-0.0912558	-1.24503	-0.0763644	-1.06597	-0.307114	-0.904883	-1.4906	-1.26781	-0.433888	-0.0046535	-0.0400329	0.662485	0.591778	-2.0535	-3.65041
8030462N17Rik	3.70723	3.74034	3.83126	3.63862	4.56376	3.93577	3.71373	3.84439	3.8471	3.83355	3.69796	3.59738	3.75564	3.15325	3.73219	3.28187	3.45961	3.15838
9030612E09Rik	-2.23118	-3.2235	-2.26587	-1.29024	-2.06843	-2.10615	-3.65041	-1.73029	-3.09613	-2.63594	-2.37498	-3.65041	-0.691679	-3.65041	-2.55014	-1.72414	-0.435689	2.23081
9130008F23Rik	-0.210846	-0.537346	-1.57257	-0.627486	-1.77919	-0.502659	-0.908707	-0.96684	-1.82053	-0.925568	-2.37498	-1.22036	-1.6465	-1.54207	-1.32738	0.256823	-0.754529	1.02428
9130011E15Rik	4.32781	4.19862	4.44361	4.55955	4.31796	4.32753	4.15218	4.23701	4.0732	4.23001	4.01307	4.01733	4.41277	4.29536	4.34046	4.73452	4.17884	3.88667
930412E21Rik	-3.65041	-3.65041	-3.65041	-3.65041	-3.65041	-3.65041	-3.65041	-3.65041	-3.65041	-3.65041	-3.65041	-3.65041	-0.323796	-0.473565	1.09046	0.898378	1.23386	0.677758
9330136K24Rik	-1.03646	-1.40261	-1.07994	-1.33086	-0.741	-1.27827	-0.682077	-1.06774	-1.29125	-0.936742	-1.55698	-1.59377	-0.199425	-0.443685	-0.0954377	-1.62156	-1.26251	-0.622281
9330161L09Rik	-1.34595	-0.602597	-0.653935	-1.25072	-0.99121	0.280441	-0.908707	-0.887834	-0.765285	-0.818338	-1.01599	0.0818081	-0.838592	1.02783	-3.65041	-1.08939	-0.174717	-3.65041
9930104L06Rik	3.10205	3.15046	2.7991	2.95573	2.85578	3.04527	2.73933	2.76827	2.6583	2.90085	2.62888	2.66206	3.25381	2.74899	3.13568	2.494	2.45274	2.76789
9930111J21Rik1	-2.12865	-0.90606	-3.65041	-3.08949	-2.99415	-2.20682	-2.7923	-3.65041	-0.184438	-3.65041	-3.00122	-1.08583	-1.56748	-3.65041	-3.65041	-3.65041	-3.65041	0.627949
9930111J21Rik2	-0.178469	-0.182789	-0.625104	-2.68663	-1.83258	-0.220222	-1.44367	-0.693895	-3.65041	-1.82243	-0.47996	-2.23472	-1.94636	0.234011	-0.675202	-1.72414	-0.754529	-3.65041
A230072I06Rik	-2.6613	-0.249158	-1.24559	-1.12632	-1.46627	-1.34842	-1.43102	-1.68951	-1.51069	-1.3054	-1.89859	-2.18802	-0.436313	-1.39187	-1.93324	-0.217118	-1.16443	-3.65041
A2m	-1.34595	-1.62862	-1.39984	-0.0739116	-0.166197	-1.86085	-0.743278	-1.33487	-1.51069	-1.45804	-1.54106	-1.97479	-3.65041	-1.39187	-3.65041	-2.01789	-1.16443	-3.65041
A330069E16Rik	1.76119	1.31427	1.02725	1.28978	1.58894	1.08044	1.83378	1.96075	1.49561	1.51097	1.95649	1.90681	1.83527	1.19148	-3.65041	1.60167	1.81452	3.00391
A3galt2	-1.49747	-2.10788	-1.39984	-1.70508	-2.43057	-2.66284	-0.823623	-1.56137	-1.65731	-2.63594	-2.11721	-2.74135	-1.39837	-0.263231	0.74322	-3.65041	0.145146	-3.65041
A430046D13Rik	0.416479	0.548905	0.732776	0.905707	0.779767	-0.0586151	-0.0543383	0.625398	0.269703	0.758992	0.363421	0.354511	1.7034	1.23831	1.99727	1.06529	1.52959	-0.409686
A4galt	-0.00378888	0.442945	0.0883653	-0.905709	-0.0722203	0.647807	-0.020798	0.51924	0.984613	0.42105	0.276253	0.528907	-0.323796	0.797029	0.23002	-3.65041	-3.65041	-2.04397
A530064D06Rik	-1.01343	-1.89673	-2.26587	-0.199942	-1.30665	-0.645492	-0.0543383	-1.31406	-1.07999	-0.818338	-1.37663	-2.38466	-0.270666	-0.329992	-3.65041	0.664635	-3.65041	-3.65041
A730015C16Rik	-0.669527	-0.415081	-0.754426	-2.11394	-0.99121	-0.864431	-0.526043	-0.547045	-0.399914	-0.302541	-0.71874	-0.904989	-3.65041	-1.70975	-3.65041	-3.65041	-0.570528	-3.65041
A730071L15Rik	-0.362627	-1.09033	-0.873704	-0.401535	-0.650322	-0.502659	-0.473242	-1.06774	-1.3776	0.0766301	-0.413231	-1.97479	-0.323796	-0.399993	-1.03035	-3.65041	1.09224	-3.65041
A830052D11Rik	-1.85864	-1.26949	-1.24559	-2.37205	-1.77919	-3.07372	-1.19897	-0.673872	-1.25577	-1.04141	0.0320694	-2.18802	-3.65041	-3.65041	-3.65041	-0.417421	-3.65041	-3.65041
A930002H24Rik	-1.66678	-0.602597	-0.471792	-1.38687	-0.893409	-1.86085	-0.594883	-1.83017	-1.25577	-1.45804	-0.909957	-1.22036	-3.65041	-1.54207	-1.32738	-2.38716	-2.70898	-1.75252
A930007I19Rik	-1.08365	-1.26949	-0.754426	-1.12632	-0.414942	-0.584956	-1.31034	-0.812932	-0.336761	-0.232015	-0.198223	-0.727512	-0.558353	-3.65041	-1.93324	-1.72414	-2.70898	-2.40958
A930035D04Rik	-1.66678	-2.54753	-1.39984	-0.193685	-2.73497	-2.08204	-1.86885	-1.83017	-2.21564	-2.31113	-3.0911	-3.12543	-3.65041	-3.65041	0.0513017	-3.65041	-1.16443	-3.65041
AA543186	-1.49747	-1.62862	-0.754426	-0.394341	-1.01159	-1.49987	-0.751115	-1.98603	-2.21564	-0.376691	-1.13045	-1.34292	-0.0309192	0.27502	-0.902003	-3.65041	-0.0600335	-3.65041
Aaas	5.78616	5.88873	5.81306	5.94971	5.81937	5.74567	5.90078	5.94682	5.97313	5.7524	5.90714	6.0785	5.78121	5.68482	5.20137	5.41513	5.57888	5.40492
Aacs	5.57462	5.42154	5.25153	5.3505	4.90525	5.21174	5.60332	5.6226	5.57563	5.54198	5.6044	5.53149	4.24504	4.32821	4.14259	4.40307	4.35969	3.47245
Aaed1	5.00884	5.06618	5.01846	4.8657	4.54142	5.09435	4.86467	4.55683	4.77093	4.81834	4.66957	4.78415	6.00763	6.15767	5.88407	6.37195	5.81283	5.38219
Aagab	5.2241	5.21337	5.23688	5.21463	5.26021	5.27012	4.87122	5.03416	5.00117	5.10624	5.05605	4.9965	5.46983	5.42854	5.37135	5.01636	5.33348	4.71699
Aak1	5.63347	5.75177	5.79072	5.80654	6.09916	5.88355	5.44805	5.58414	5.61978	5.63549	5.50726	5.48226	6.61926	6.29367	6.49588	6.54862	6.41854	6.86616
Aamdc	3.05585	2.8777	3.28955	3.05827	3.41004	3.03084	2.38446	2.78705	2.85574	2.72588	2.65503	2.7937	3.35954	3.73553	3.35706	3.63905	2.91207	2.74471
Aamp	8.1783	8.15439	7.88576	8.02614	7.37709	7.77378	7.97039	8.13923	8.11329	8.01319	7.98829	8.16727	7.58736	8.01875	7.47496	7.72239	7.70569	7.35154
Aar2	4.45837	4.44031	4.47307	4.25437	4.2961	4.53025	4.58881	4.77724	4.66691	4.63544	4.71585	4.54676	4.08099	3.98763	3.72376	3.96687	3.84531	3.95896
Aard	2.47778	2.9893	3.12393	0.951597	3.68796	4.01823	-0.397496	-0.430472	0.340965	3.77482	2.48177	3.14047	0.212418	0.403866	0.337942	0.115465	2.01359	2.51738
Aars	7.24144	7.17588	7.16318	7.02948	7.06479	7.07702	7.5881	7.78712	7.75805	7.62274	7.51711	7.60277	6.76966	7.04799	6.61424	6.6575	6.68538	6.60615
Aars2	3.04903	3.10622	3.0439	3.20166	3.26402	3.26734	3.39665	3.17571	3.31938	3.02915	3.28866	3.01508	2.72542	3.28177	3.84167	3.1879	3.01246	4.19105
Aarsd1	3.71112	3.19338	4.27381	4.05629	4.33571	4.12077	4.19053	3.2588	4.08939	4.37517	3.94934	4.20018	3.48146	3.47014	3.15204	3.45104	3.4344	3.45113
Aasdh	4.13743	4.13774	4.1659	4.23913	4.23469	4.24716	3.97352	4.18107	3.96489	4.05526	3.9234	4.00167	3.55025	4.475	3.95956	4.3088	4.18699	3.26895
Aasdhppt	3.6362	3.52812	3.69975	3.87652	3.94753	3.84832	3.57568	3.82106	3.74862	3.89787	3.78737	3.81364	3.78731	3.8402	4.43767	4.39161	3.7542	3.86533
Aatf	6.96027	6.95732	6.66483	6.79935	6.43084	6.68603	6.99588	7.15884	6.95718	6.97967	7.053	7.10966	6.07704	6.20442	5.95697	6.24894	6.06773	5.69226
Aatk	-2.6613	-0.897846	-1.24559	0.235267	-0.557497	-0.765134	-1.31034	-0.812932	-0.676591	-0.164777	-1.25477	-0.427092	-2.32536	-3.65041	-3.65041	-3.65041	-3.65041	-3.65041
Abat	2.02858	2.36964	2.19208	1.61615	2.36657	2.47472	1.22944	1.46511	1.08027	2.18523	2.1674	1.998	2.1556	2.60542	1.51512	2.23504	1.14101	2.17986
Abca1	8.763	8.73673	8.62894	8.59901	8.20383	8.61996	8.30599	8.3139	8.15131	8.22993	8.18171	8.16797	8.81557	8.95675	8.60932	8.79002	8.6693	8.26751
Abca12	-0.811262	-2.24702	-1.09304	-0.979148	-1.92621	-0.794212	-1.99344	-2.27681	-1.78637	-3.05578	-3.0911	-3.12543	-0.436313	-2.46298	0.295737	0.0854516	-2.14408	0.41538
Abca13	1.32841	1.04277	1.84243	2.38584	1.30976	1.27963	0.491959	-0.0837322	-0.0568161	0.234399	0.183478	-0.427092	2.28545	2.1661	0.927259	2.09142	0.484441	3.07719
Abca14	-2.6613	-3.65041	-3.65041	-3.65041	-2.17934	-3.65041	-3.65041	-3.65041	-3.65041	-3.65041	-3.65041	-3.65041	3.1813	2.17816	3.88234	2.85139	3.19675	2.3276
Abca15	-3.65041	-3.65041	-3.65041	-3.65041	-3.65041	-3.65041	-3.65041	-3.65041	-3.65041	-3.65041	-3.65041	-3.65041	1.80589	1.88629	2.10964	0.256823	1.62525	2.37366
Abca16	1.68581	1.7659	2.30874	1.78567	1.86389	1.98333	1.58108	1.41613	1.51799	1.90133	1.61307	1.21206	3.0621	2.99042	3.76156	3.16027	3.88164	2.6972
Abca17	2.33032	2.73048	2.65472	3.12487	2.34268	2.63146	2.11813	1.61234	1.661	1.82399	1.76647	2.03046	3.55688	2.80607	3.30681	3.73279	3.60575	3.46821
Abca2	6.72386	6.8635	6.71096	6.90107	7.18515	6.83154	6.76303	6.73812	6.69889	6.77497	6.78501	6.63041	6.75059	7.01353	6.82134	6.84341	6.67507	6.54196
Abca3	5.73672	5.70611	5.73018	5.7094	5.67758	5.62478	5.42921	5.42246	5.43343	5.63301	5.54492	5.36809	5.94416	5.96906	5.60869	5.64664	5.54531	5.28872
Abca4	-1.20885	0.11789	-0.157797	-0.806885	-0.110178	-0.350935	-0.908707	-1.44368	-1.3776	-0.925568	-1.70878	-2.74135	-1.6465	-0.719886	-2.99783	-1.72414	0.0462007	-1.12142
Abca5	3.56627	3.68331	3.99497	3.86195	4.62899	4.10281	3.66671	3.50739	3.42337	3.27901	3.57095	3.50712	4.65169	4.19802	4.39458	4.36843	4.80394	4.76386
Abca6	-1.08365	-0.474919	-0.754426	-1.70508	-0.557497	0.0813724	-2.50051	-1.56137	-1.82053	-0.232015	-0.549926	-1.97479	0.212418	0.182251	-3.65041	0.503742	1.27813	-3.65041
Abca7	5.25702	5.40815	5.16648	5.08052	4.87781	5.21037	5.18533	5.29025	5.06249	5.21595	5.35751	5.25999	5.36251	5.28409	5.24881	5.37731	5.20749	4.99509
Abca8a	-0.762454	-1.12827	-0.388676	-0.905709	0.432844	-0.765134	-0.999124	-0.812932	-0.162369	-0.454861	-1.01599	-0.813523	-1.39837	-1.0171	-0.152728	-0.313796	-0.586318	-2.90052
Abca8b	-1.10783	-1.10917	-0.42135	-0.156697	-0.893409	-0.526859	-0.0886768	-0.236884	-0.306192	0.455648	-0.217073	-0.646342	0.78417	0.27502	-1.93324	-2.08457	-3.65041	-0.161764
Abca9	-1.49747	-2.54753	-1.99605	-3.65041	-3.12127	-0.584956	-2.7923	-2.59044	-2.21564	-1.62876	-1.54106	-3.12543	0.212418	-0.719886	1.62573	1.79951	1.90483	2.07224
Abcb10	3.52754	3.53572	3.58619	3.3748	3.04714	3.93577	3.4993	3.29481	3.31447	3.32652	3.56176	3.46664	3.43424	3.83258	3.94342	4.21662	3.65695	4.22495
Abcb1a	-3.02586	-2.31102	-2.26587	-2.72221	-1.16295	-3.02695	-3.65041	-2.80596	-2.33399	-1.647	-3.04546	-1.20866	0.367936	0.0779632	0.28499	-2.01789	0.814112	1.42512
Abcb1b	1.51815	0.954797	1.47178	2.2328	1.72605	1.3654	1.03811	1.28246	1.0918	1.09703	0.667376	1.60749	0.945541	2.93747	1.18019	1.57491	2.58904	1.17062
Abcb4	2.41019	2.4579	2.58446	2.98912	2.8459	2.48383	3.40063	3.41615	3.47664	3.06881	2.99787	2.90156	2.1958	2.56374	1.5825	0.906984	-1.02879	1.97797
Abcb6	5.61246	5.51179	5.48488	5.77018	5.12408	5.42362	5.60352	5.76655	5.74256	5.69733	5.80282	5.58079	4.69106	4.77476	4.39395	4.9096	4.46496	4.05491
Abcb7	4.10852	4.16446	4.2301	4.32636	4.52183	4.39026	4.49628	4.46651	4.4842	4.38306	4.54761	4.61502	4.53269	4.74182	4.01508	4.41065	4.39078	4.51258
Abcb8	4.04892	4.08665	4.12441	4.00075	4.01489	3.97184	4.09049	4.11523	4.13577	4.10276	4.41592	4.17667	3.54211	3.70042	3.66073	3.709	3.24104	2.20895
Abcb9	0.576807	0.729429	1.28694	0.899866	1.67754	1.08311	0.148806	-0.0360931	0.211736	0.530588	0.694526	0.062622	2.04049	1.81083	2.58087	2.07242	0.878801	0.409495
Abcc1	6.46338	6.53035	6.50413	6.47535	6.27076	6.45012	6.52313	6.49115	6.59795	6.54697	6.60271	6.40428	6.4771	6.47051	6.27106	6.39718	6.35936	6.17748
Abcc10	3.22272	3.39655	3.41689	3.38477	3.51619	3.03222	2.77524	2.85237	2.62776	2.96305	3.14843	2.8282	1.7034	2.97044	3.67108	2.75934	2.03954	2.37366
Abcc12	-2.34156	-1.92984	-0.754426	0.528107	0.703669	0.133773	-2.50051	-2.86527	-3.13859	-2.63594	-3.0911	-3.65041	0.712094	-0.263231	2.23638	1.99381	2.11228	1.17062
Abcc2	-3.0727	-2.92756	-3.65041	-1.89508	-2.43057	-3.65041	-3.65041	-3.65041	-3.65041	-3.65041	-3.65041	-3.65041	-2.32536	-3.65041	0.895818	-3.65041	0.145146	-3.65041
Abcc3	0.820552	1.26024	1.5156	0.951597	0.706792	1.39146	1.67179	1.95648	1.76687	1.42191	2.1674	1.82377	1.4421	0.31926	1.56038	1.51987	0.878801	1.51007
Abcc4	4.93696	4.90709	5.25477	5.59149	5.37027	5.02858	5.34661	5.42788	5.49775	5.20487	5.2742	5.18157	4.57757	4.38395	3.77122	3.43104	4.05706	3.98392
Abcc5	5.75349	5.98188	5.83268	5.95861	6.01034	5.83966	5.79056	5.82334	5.86765	5.79134	5.86192	5.77444	5.96466	5.85564	5.28903	5.5698	5.42543	5.74154
Abcc6	-2.34156	-1.07173	-1.99605	-0.324309	-1.96544	-3.65041	-1.86885	-1.23369	-0.850939	-1.3054	-1.70878	-2.18802	-2.84082	-3.65041	-0.573907	-3.65041	0.484441	0.522853
Abcc8	3.92328	4.18419	4.02067	4.53809	3.90331	3.90105	4.38807	4.07906	3.94597	4.12477	3.9334	3.94419	2.89893	1.55556	2.45947	2.74621	2.86058	3.73612
Abcc9	0.0298542	-1.37955	-0.471792	1.00698	-0.0042719	-0.0295098	-0.546352	1.40205	-1.24413	2.51753	2.67477	1.86589	-0.0309192	-2.11808	-1.93324	-2.01789	-0.944972	-3.65041
Abcd1	2.38333	2.04689	2.00495	1.61793	2.44438	1.96754	1.82458	1.87952	1.23378	1.6996	2.10553	2.24138	1.82554	2.22543	1.15089	2.75934	2.06504	1.91499
Abcd2	2.18608	1.86456	2.25677	2.7769	1.99865	1.92505	1.91401	2.03055	1.87753	2.05025	1.6395	1.795	1.59306	1.24979	2.04741	0.115465	1.09224	2.21403
Abcd3	4.6596	4.54382	4.59551	4.51105	4.91541	4.68642	4.62691	4.65756	4.48486	4.53816	4.4534	4.33572	4.63125	4.99308	4.48832	4.94685	4.27865	4.86944
Abcd4	2.42397	2.53955	2.634	2.48279	2.23109	2.50587	2.86384	2.47885	2.60381	2.48231	2.57603	2.85353	0.197412	1.85658	2.12026	2.83457	2.1485	2.05726
Abce1	6.0194	6.06059	6.20524	6.21845	6.72014	6.13136	6.47435	6.49447	6.57165	6.29655	6.3825	6.42526	6.03427	5.89115	5.77849	6.17304	6.10077	6.08959
Abcf1	8.33512	8.21214	8.10661	8.21654	7.84679	8.0179	8.19867	8.31754	8.25872	8.26615	8.15217	8.22756	7.71138	7.83739	7.44819	7.28367	7.52636	7.67802
Abcf2	7.51508	7.51635	7.50466	7.61722	7.45226	7.31225	7.74629	7.79558	7.72564	7.70817	7.57133	7.6308	7.24771	7.25757	7.15129	7.26135	7.47676	7.31167
Abcf3	5.61662	5.45309	5.48419	5.46259	5.42331	5.43175	5.58311	5.64278	5.65059	5.75338	5.51573	5.50175	4.92084	5.30486	5.14696	4.88911	4.93451	4.60237
Abcg1	4.59925	4.38689	4.63204	4.66231	4.36565	4.39644	4.41326	4.42861	4.4807	4.30605	4.46872	4.33472	4.60626	4.53015	4.30133	3.61955	4.38522	2.76789
Abcg2	3.10205	3.34124	3.66126	3.12174	3.47969	3.09237	3.65193	3.40873	3.83	3.10604	3.44671	3.28198	3.39367	3.85905	4.13101	3.8265	4.1724	4.64368
Abcg4	-2.07999	-1.16722	-0.979208	-0.467948	-0.414942	-1.08623	-0.823623	-0.741727	-0.336761	-0.625183	-1.54106	-1.22036	-2.32536	-3.65041	-1.17123	1.88911	-3.65041	-3.65041
Abhd1	0.0842393	-0.742682	-1.57257	-0.193685	-0.801819	-0.584956	-0.279472	0.0426597	-0.399914	-0.71853	-0.328804	-0.122604	-1.39837	-3.65041	-3.65041	-2.01789	-1.42338	-2.40958
Abhd10	4.13517	4.1718	3.86932	3.86533	4.11846	4.10609	4.35057	4.37756	4.3426	4.30308	4.34299	4.13365	4.02896	4.13445	3.62974	4.08487	3.81482	3.65139
Abhd11	3.54219	3.48165	3.76064	3.90231	3.92022	3.80454	3.82661	3.75828	3.8471	3.70912	3.4367	3.73629	3.91892	3.19599	3.36218	3.08737	3.77675	3.83821
Abhd12	4.59715	4.63527	4.49704	4.41834	4.39014	4.48961	4.65664	4.84038	4.72041	4.6637	4.7834	4.45225	4.23083	4.18314	4.55134	4.29657	4.49669	3.88136
Abhd12b	-1.49747	-1.98099	-2.26587	-2.11394	-3.12127	-1.34842	-0.460338	-0.547045	-1.3776	-0.818338	-0.71874	-1.97479	-2.84082	-0.633022	-0.0471094	0.664635	-3.65041	-3.65041
Abhd13	3.72446	3.82962	3.91544	4.03146	4.06472	4.03899	4.08225	4.11523	4.09341	3.88998	4.29944	4.18473	4.14104	3.59685	3.22835	3.55257	4.17884	2.82427
Abhd14a	3.52705	3.40487	3.19234	3.35893	2.92511	3.03153	3.21753	3.22986	3.11432	3.03631	3.06637	3.40133	3.3002	3.32581	3.99832	3.12474	3.17232	3.73023
Abhd14b	-2.34156	-1.37955	-0.471792	-1.89508	-0.893409	-1.08623	-1.70769	-0.673872	-1.51069	-1.45804	-1.89859	-1.1074	-0.558353	-1.39187	0.389019	-0.782197	-2.14408	1.09931
Abhd16a	4.60415	4.60831	4.60441	4.73771	4.45191	4.29598	4.54288	4.61139	4.40651	4.42021	4.5684	4.60096	4.53717	4.52284	4.17896	4.43726	4.30724	3.84367
Abhd16b	-3.65041	-3.65041	-3.03033	-3.65041	-3.65041	-2.34341	-2.7923	-3.65041	-3.65041	-3.65041	-2.11721	-3.65041	-0.219423	1.35978	3.05733	3.41604	3.32891	3.29232
Abhd17a	4.9314	4.87285	4.78555	4.66876	4.66756	4.61932	4.85518	5.05693	4.91784	4.88412	4.9133	5.00909	4.31188	4.20688	5.02086	4.72239	4.48729	4.12076
Abhd17b	2.54718	2.31768	2.60082	2.36479	2.83524	2.90231	2.88611	2.41172	2.62061	2.14605	2.86452	2.67949	2.30308	2.9986	2.36058	3.39325	2.81623	3.40011
Abhd17c	4.1889	4.24735	4.29753	4.25951	4.53111	4.32444	4.58044	4.50782	4.61814	4.36411	4.57023	4.53506	3.66991	3.85905	3.12668	3.55941	3.88879	3.62624
Abhd2	6.26114	6.35666	6.29189	6.11212	6.16647	6.32345	6.3601	6.3829	6.43402	6.27226	6.30156	6.34217	6.18926	6.38496	6.16827	6.35013	5.99862	6.18223
Abhd3	3.08281	2.83768	2.48438	2.54399	2.0239	2.48484	2.96595	2.97369	3.09154	2.89377	2.9014	3.3279	2.97679	2.57473	2.65994	2.96907	2.55345	2.5972
Abhd4	4.35847	4.39548	4.36196	4.2652	4.37549	4.66677	3.97054	4.15519	4.17395	4.48681	4.23705	4.1875	4.56667	4.69431	4.76701	5.2709	5.04722	4.46372
Abhd5	3.73724	3.76674	3.59132	3.53881	4.16177	3.84793	3.7596	3.8441	4.0017	3.64076	3.70674	3.81722	3.90744	4.44761	5.60397	5.41927	5.70608	5.25917
Abhd6	3.04903	2.97819	2.86832	2.76007	2.6683	2.88637	2.90493	3.02563	3.15882	3.0709	3.1967	2.97716	3.4238	3.64544	2.74081	3.39096	2.95906	2.12706
Abhd8	1.51419	1.29648	1.69779	1.79514	1.9573	2.22832	0.352665	0.356779	0.683235	0.849588	1.00219	1.35297	3.64247	3.04544	4.70032	3.81511	3.38059	4.24574
Abi1	5.34457	5.2227	5.28973	5.41066	5.78461	5.33869	5.59678	5.47618	5.68818	5.47781	5.455	5.49964	5.68833	5.65168	5.21577	5.49096	5.31234	5.12869
Abi2	5.87271	5.92535	5.88904	5.77318	5.82108	5.80444	5.88601	5.81893	5.93925	5.62864	5.76809	5.80118	6.22681	6.24002	6.063	5.93648	5.85199	6.25356
Abi3	2.36148	2.03621	1.73533	1.16142	1.51961	1.64537	2.04422	2.31568	1.89078	1.31527	1.97322	2.58011	2.03417	2.31554	1.99891	0.44586	1.75623	1.36558
Abi3bp	0.498869	0.41024	1.40346	0.450324	0.47374	1.27963	-0.743278	-0.430472	-1.51069	0.799961	-0.909957	-0.184295	-1.39837	-1.13154	0.389019	0.503742	-0.0600335	-3.65041
Abl1	6.33645	6.41326	6.31392	6.41469	6.38632	6.33545	6.38143	6.41563	6.36891	6.42125	6.50946	6.20863	6.3672	6.47259	6.63944	6.67351	6.67621	7.13322
Abl2	7.32586	7.31384	7.39274	7.32011	7.24677	7.4158	7.36207	7.45081	7.57941	7.41952	7.42187	7.41387	7.42982	7.40899	7.30281	7.54232	7.30944	7.03786
Ablim1	2.47778	2.36111	2.64094	2.38584	2.16566	2.7258	2.21583	1.99971	2.35972	2.18394	2.16619	2.02427	2.58835	1.42196	1.96733	2.28706	1.9328	3.09564
Ablim2	0.576807	1.16543	0.400251	1.06032	1.60576	0.969484	0.198471	0.121161	0.0883091	0.546725	0.0320694	-1.62454	1.16196	1.55741	2.12479	1.67907	1.59055	0.945136
Ablim3	2.36148	2.23606	2.10872	2.21996	1.65509	1.61067	1.74325	1.90193	1.64701	1.94764	1.50219	1.78039	2.17488	2.55636	2.09433	2.77118	1.55501	1.09931
Abo	-1.34595	-2.10788	-1.10626	-1.53722	-1.09613	-2.34341	-2.50051	-1.05042	-1.51069	-2.63594	-1.89859	-1.47687	-2.32536	-3.65041	-3.65041	-2.88472	0.0462007	-0.161764
Abr	7.35564	7.37574	7.08677	6.66913	6.72563	7.19153	7.03204	7.19983	7.09476	7.09686	7.08622	7.14426	7.55324	7.72806	7.44367	7.85196	7.23284	7.41671
Abracl	0.283338	0.157842	0.145256	0.637442	0.643026	0.615005	1.26872	0.734303	1.67792	1.0805	0.949629	1.07516	-1.6465	-0.263231	0.0513017	-0.782197	-1.42338	-3.65041
Abt1	4.37302	4.39192	4.21224	4.3372	4.37549	4.23462	4.36356	4.48351	4.59504	4.41087	4.29113	4.50429	3.91892	4.62331	3.19286	3.1737	4.22141	3.8988
Abtb1	5.71027	5.65223	5.39918	5.63488	5.18678	5.44348	5.4252	5.38487	5.3007	5.36985	5.35632	5.5391	5.51403	5.6429	5.70443	5.96264	5.53827	5.98342
Abtb2	3.72873	3.96807	3.86552	3.38006	3.9376	4.01124	4.27542	4.44206	4.50891	4.37263	4.44893	4.27345	3.63553	3.64978	3.90445	3.91449	3.44997	3.19305
AC015800.4	2.20338	2.41321	2.41551	2.36267	1.61908	1.83455	2.15738	1.80419	1.63446	1.74051	1.88169	1.81807	3.29139	2.80062	3.07069	2.74141	2.38754	2.39764
AC074312.5	1.89348	1.96706	1.26913	2.04182	2.3143	1.45874	1.74046	1.74345	1.59127	1.30819	1.51367	2.12828	1.37033	0.981778	2.09741	1.86722	1.19281	1.61607
AC074335.4	-1.43494	-1.07173	-1.39984	-0.905709	0.132038	-0.0295098	-1.31034	-1.71657	-1.85551	-3.05578	-0.859725	-1.00265	-0.691679	-1.39187	-0.573907	1.3939	-0.0600335	-1.51017
AC074336.1	0.324586	-0.143414	0.172882	-0.290527	-0.0248403	-0.273823	-0.218451	-0.791199	0.333218	-0.0151444	1.0049	-0.0581831	0.881264	0.31052	0.443191	-0.52907	0.49948	-3.65041
AC079042.1	3.32055	3.31144	3.64754	3.63731	3.25711	3.51758	3.15863	2.91154	2.86651	3.11147	3.25201	2.63877	3.64593	3.95891	3.28944	3.54982	2.99399	3.94377
AC084390.5	0.0788921	1.31427	0.846932	-0.156697	0.386866	1.03982	1.05393	1.61234	1.60098	0.906971	1.08659	0.778608	2.33428	2.1355	2.7418	2.77235	2.95088	2.92154
AC087062.10	0.458262	0.307425	0.616873	-0.257519	0.606715	0.37054	-0.123853	0.429538	0.620971	0.234399	0.276253	0.56344	-0.691679	0.31926	1.31836	-3.65041	-0.754529	-1.30274
AC087062.5	-1.66678	-1.84844	-0.896491	-1.12632	0.136676	0.261725	-0.689587	-0.338291	-1.73661	-1.62876	-1.70878	-1.50522	0.35447	-3.09152	0.113367	0.694767	-0.435689	1.02428
AC087062.7	0.412233	-0.249158	0.400251	-0.905709	1.28908	0.0760261	0.615937	0.516338	-0.162369	-0.309786	-0.47996	-0.236808	0.420574	-0.551092	1.2089	0.809372	1.69223	-2.90052
AC087062.8	0.0298542	-0.249158	-0.388676	-0.467948	0.0943888	0.133773	-0.594883	-0.812932	-0.765285	-0.925568	-1.01599	-1.1074	-2.32536	-0.0796955	-2.55014	-3.65041	-3.65041	-0.161764
AC087115.1	1.00101	0.708061	0.0883653	0.368107	-0.110178	-0.0295098	0.458376	0.51924	-0.00680129	-0.0390301	-0.262037	0.128686	-0.558353	1.66418	1.05926	0.44586	1.04177	-3.65041
AC090443.3	1.1939	1.25104	1.20636	1.32508	1.4223	0.978108	0.914768	0.908204	0.897997	1.41314	1.67572	1.06073	2.53563	1.93117	2.68468	2.62365	2.9316	3.55073
AC092202.4	-0.0854819	0.474926	0.874114	-0.467948	-0.414942	0.326194	0.919712	0.333887	0.0883091	-0.164777	0.0843246	-0.236808	-1.39837	-0.551092	0.23002	-0.313796	-1.16443	-0.563228
AC092404.2	0.60312	-3.65041	1.55182	1.0914	1.63063	0.922596	2.11166	2.88929	2.43675	0.658617	2.35882	-3.65041	-0.270666	0.0467276	-3.65041	-3.65041	-3.65041	-1.80629
AC093366.4	-3.65041	-3.65041	-3.65041	-3.65041	-3.65041	-3.65041	-3.65041	-3.65041	-3.65041	-3.65041	-3.65041	-3.65041	0.420574	0.595928	2.44747	2.96907	1.65913	3.75364
AC093451.2	-0.422034	0.506213	0.490838	0.0366755	0.0943888	-0.0883197	0.157203	0.266404	-1.0392	0.183702	-0.137113	0.34263	-0.323796	0.27502	0.74322	0.385558	0.145146	1.59029
AC093473.3	-0.582226	-0.197836	-0.0326237	-0.132555	-0.414942	-0.765134	-0.460338	-0.128449	-0.218189	0.0199587	-0.549926	-0.813523	0.0548351	-0.0233629	-1.32738	-0.52907	-3.65041	1.93561
AC099599.1	-1.51353	-0.677956	-0.979208	-0.416032	-1.67799	-0.794212	-1.49538	-0.96684	-1.51069	-1.16738	-1.13045	-1.77174	-3.65041	0.873196	-3.65041	-2.77054	-1.96827	-3.65041
AC099860.1	4.67983	4.75521	4.62606	4.91792	4.25136	4.75305	4.66623	4.58342	4.78891	4.55021	4.85603	4.53158	5.05435	4.80793	5.19869	4.98011	4.80394	5.28551
AC101740.1	-3.65041	-3.65041	-3.65041	-3.65041	-3.65041	-3.65041	-3.65041	-3.65041	-3.65041	-3.65041	-3.65041	-3.65041	-1.6465	-2.11808	-3.65041	-1.4802	-0.174717	1.51007
AC101789.2	-3.65041	-3.65041	-3.65041	-3.65041	-3.65041	-3.65041	-3.65041	-3.65041	-3.65041	-3.65041	-3.65041	-3.65041	-1.81885	-3.65041	1.50358	2.00587	0.962584	1.972
AC101915.2	1.98637	2.01462	2.33343	2.05895	2.27593	2.19542	2.66841	2.31484	2.87521	2.02167	2.38092	2.14206	3.02008	2.4707	2.06322	3.2484	3.03843	3.11384
AC102077.1	2.02858	2.33521	1.95809	2.26609	2.435	1.99754	2.21382	2.3405	2.34053	1.8696	2.17946	2.46791	1.99132	1.88629	1.39532	1.62793	1.98716	1.97598
AC102096.1	5.4489	5.26904	5.21695	5.26775	5.27869	5.07455	5.19032	5.07134	5.04303	5.05056	4.93836	4.97068	5.4202	5.53741	5.28466	5.01362	5.6028	4.98276
AC102103.4	1.6502	1.49669	1.57892	2.00556	1.62239	1.7346	1.9507	2.19292	2.09926	1.52733	1.52127	1.72045	0.954494	1.9154	0.927259	1.95283	2.64082	1.27139
AC102121.3	0.538364	0.78406	0.486442	0.888114	0.643026	0.654996	-0.17564	-0.511073	-0.0619142	-1.04141	-0.0842433	-0.0687221	0.954494	0.522142	0.486049	1.20793	-1.51108	-0.451914
AC102198.1	-2.12865	-2.14629	-3.65041	-1.70508	-2.43057	-3.02695	-3.65041	-2.86527	-2.21564	-3.05578	-2.37498	-3.12543	-1.6465	0.887959	-0.0135543	-1.08939	-0.754529	-2.04397
AC102224.2	-1.66678	-0.602597	-0.896491	-1.70508	-1.96544	-0.672234	-0.944197	-1.33487	-2.76156	-1.45804	-0.631865	-1.47687	1.11881	-0.551092	-0.33137	0.322626	0.758939	2.76789
AC102227.2	-3.65041	-3.65041	-3.65041	-3.65041	-3.65041	-3.02695	-3.65041	-3.65041	-3.65041	-3.65041	-3.65041	-3.65041	0.680066	0.00399943	-3.65041	-0.741279	0.946212	-2.68373
AC102232.1	-3.0727	-2.54753	-1.39984	-1.38687	0.31503	-1.08623	-2.7923	-3.65041	-3.65041	-3.65041	-3.65041	-3.12543	0.35447	0.559507	2.85421	2.79455	3.31834	4.07967
AC102296.1	0.80768	0.678153	0.44172	0.60191	0.899215	1.14058	1.07846	0.83323	0.555898	1.01531	0.371855	0.243885	1.64928	1.46198	0.0513017	0.669701	-0.586318	1.97399
AC102506.1	1.60441	1.53056	1.52635	0.384929	0.603368	1.15079	1.8507	2.20829	1.84793	1.48608	2.17585	1.83936	1.42932	0.0308525	1.48726	0.809372	1.32109	-0.348576
AC102609.2	2.21927	2.26012	1.81639	2.17956	1.97812	1.46079	2.27103	2.39444	2.14201	2.19678	2.21271	2.55544	1.54941	2.9558	1.70849	1.33772	1.44278	1.83383
AC102628.1	3.0346	2.88664	2.8801	2.9423	3.02167	3.29636	2.92413	2.98895	3.04961	2.83009	2.85101	2.84373	3.44699	2.60184	3.15573	3.41604	3.11488	1.54
AC102860.3	-1.66678	-0.742682	-0.310088	-0.394341	-0.634431	-0.21366	-0.743278	-1.56137	-0.607872	-1.04141	-0.71874	-1.22036	-0.219423	-1.54207	-3.65041	-1.4802	-0.435689	-3.65041
AC102874.1	-1.30343	-1.37955	-2.88653	-0.506209	-1.08528	-0.794212	-0.623366	-0.721033	-0.868697	-1.09049	-0.782823	-1.54881	-2.24117	-0.624616	-1.27874	-3.65041	0.324745	-2.01202
AC102895.2	-3.65041	-3.18301	-3.65041	-3.65041	-3.65041	-3.65041	-3.65041	-2.86527	-3.13859	-3.65041	-3.65041	-3.65041	0.0548351	-3.65041	-1.5025	-2.01789	-0.944972	0.00360757
AC102906.1	4.42846	1.29827	2.43161	1.27632	1.88609	2.2534	1.55113	4.78931	3.89228	6.86826	4.29723	1.42234	5.63573	4.07827	5.39544	6.11746	6.53817	4.94003
AC103360.3	-0.422034	-0.243943	-0.235561	-0.545513	-0.212633	-1.6691	-0.774881	-0.198236	-1.1985	-0.164777	-0.472391	-2.05634	-2.84082	-3.09152	1.44444	1.60167	-0.586318	-3.65041
AC103620.3	-1.34595	-0.537346	-1.24559	-1.70508	-1.20927	0.184337	-2.7923	-3.20507	-3.13859	-0.925568	-0.472391	-1.78906	-3.65041	-0.719886	-0.78415	-3.65041	-3.65041	-2.04397
AC103623.1	-0.57378	-0.685006	-0.775392	-0.875345	-2.43057	-1.39221	-1.44367	-0.105917	0.309726	-0.0330215	-2.02575	-3.65041	-3.65041	-3.65041	-3.65041	-3.65041	-3.65041	-3.65041
AC104196.2	-2.07999	-1.16722	-1.99605	-1.0118	-2.43057	-1.49987	-1.70769	-1.98603	-2.46293	-2.31113	-2.37498	-2.43832	-3.65041	-3.65041	-0.306776	-0.313796	-2.14408	-3.65041
AC104747.2	-2.07999	-1.37955	-1.57257	-1.12632	-1.20927	-2.34341	-1.09559	-1.68951	-0.765285	-0.818338	-1.70878	-0.813523	-1.94636	0.559507	-3.65041	-2.88472	-2.70898	0.467287
AC104889.1	1.92809	2.14953	1.44937	0.951597	1.08825	1.61067	2.19457	2.49515	2.31126	1.93237	2.59416	2.36399	1.5044	1.71473	2.18383	2.90608	1.72459	1.30348
AC104917.1	-2.4611	-3.65041	-2.56117	-3.65041	-3.65041	-3.65041	-3.11738	-3.65041	-2.90078	-3.05578	-3.0911	-3.65041	-3.65041	-3.65041	-0.227697	0.0392277	-3.65041	-0.161764
AC104921.1	3.28151	3.35848	3.54978	3.4813	3.6192	3.53862	3.81073	3.59286	3.639	3.8253	3.95777	3.67839	4.09117	3.26434	3.69208	3.65191	3.52538	2.44731
AC107707.3	-1.20885	-1.16722	-0.754426	-1.0118	-1.61426	-1.21138	-1.70769	-1.36666	-1.65731	-0.625183	-0.288374	-0.360836	-0.496043	-2.11808	0.131478	0.714511	-2.70898	-0.252149
AC107815.5	6.37568	6.55342	6.46417	6.67572	6.47935	6.41012	7.02018	6.95349	6.89954	6.77839	6.76304	7.00515	6.08522	6.62972	5.64473	6.09045	5.88171	6.30667
AC107822.4	-1.85864	-1.16722	-2.32647	-1.53722	0.0459017	-1.49987	-2.25792	-2.16079	-2.21564	-2.63594	-3.0911	-2.43832	-1.94636	-2.11808	1.29176	-0.313796	1.27813	0.627949
AC107822.5	-3.65041	-2.83056	-2.26587	-2.11394	-1.46627	-1.6691	-3.15847	-3.65041	-3.65041	-1.82243	-1.70878	-3.65041	-3.65041	-3.65041	-0.0135543	-0.782197	-3.65041	1.71481
AC107822.6	-1.20885	-0.742682	-0.862444	-3.08949	-1.20927	-0.424803	-3.15847	-2.86527	-3.65041	-0.454861	-0.71874	-0.727512	-3.65041	-3.65041	-3.65041	-3.65041	-3.65041	-3.65041
AC108412.2	6.00934	5.85775	5.88727	5.6134	6.14232	5.92475	6.22152	6.38031	6.31432	6.26938	6.36756	6.24605	5.1299	4.55395	4.19591	4.65693	5.21776	5.97573
AC108422.2	-3.65041	-3.65041	-3.65041	-3.65041	-3.65041	-3.65041	-3.65041	-3.65041	-3.65041	-3.65041	-3.65041	-3.65041	0.0548351	-0.633022	1.64477	1.46265	1.78414	2.72826
AC109152.2	1.84862	2.1838	2.06221	2.00284	2.02014	2.3683	2.44572	2.04874	2.09811	2.2836	2.26005	2.7328	2.46533	3.21777	2.32561	2.73175	3.00852	1.80498
AC109200.1	0.18722	0.113834	0.134056	0.149266	0.656006	0.266427	-0.831909	-0.101453	-0.190009	0.109594	0.538452	0.00348354	2.11425	-0.481133	1.40776	2.23674	0.855612	1.22524
AC109227.1	2.46963	2.41897	2.60894	2.73241	2.65382	2.55953	2.35738	2.54085	2.3796	2.41687	2.13432	2.59186	3.11297	2.24734	2.67648	2.61842	3.0229	2.67038
AC110186.1	8.19338	8.59853	8.1728	8.09483	8.04897	7.99608	8.81624	8.97389	8.65745	8.4948	8.55958	8.9375	7.12991	8.34017	7.10864	8.08412	6.87119	7.82632
AC110508.1	2.14189	1.88017	2.12295	2.29419	1.67116	2.06656	2.35829	2.4164	2.16946	2.14869	2.29594	2.64039	2.19391	1.98571	2.04741	2.68998	-0.944972	-3.65041
AC110538.1	1.96043	3.24854	-3.65041	-3.65041	2.51822	-3.65041	1.26095	0.124976	-3.65041	2.69634	-3.65041	3.50268	2.01504	1.48546	2.99192	1.77386	3.72411	4.09441
AC111034.1	-3.65041	-3.65041	-3.65041	-1.72299	-1.45227	-1.5652	-3.65041	-3.65041	-3.65041	-3.65041	-3.65041	-3.65041	-1.03725	-0.102859	1.17729	-3.65041	-0.47925	1.18447
AC111067.3	-3.0727	-3.65041	-3.65041	-2.37205	-3.65041	-3.65041	-3.65041	-3.65041	-3.65041	-3.65041	-3.65041	-3.65041	0.596742	-0.138317	0.172872	0.800162	-0.944972	-3.65041
AC111067.4	-1.66678	-1.62862	-1.76882	-0.806885	-2.73497	-1.21138	-2.25792	-2.86527	-3.65041	-2.63594	-1.89859	-3.26389	-1.18672	-3.65041	-0.707032	-0.245447	0.324745	-1.12142
AC111124.2	1.3057	1.47787	1.57892	1.08369	1.56849	1.60882	1.45052	1.66045	1.59936	1.46501	1.71437	2.04763	1.58444	1.05162	0.43835	1.75253	2.03954	2.82427
AC112938.1	-3.65041	-3.65041	-3.03033	-3.65041	-3.65041	-3.65041	-3.65041	-3.65041	-3.65041	-3.65041	-3.65041	-3.65041	2.87437	1.69975	3.49634	3.51717	3.33939	3.86533
AC113028.4	-1.49747	-2.10788	-1.10626	-1.53722	-0.99121	-1.08623	-0.743278	-0.0837322	-0.607872	-1.3054	-1.13045	-0.0167805	-1.00218	0.973496	1.5825	-0.52907	-1.73919	-3.65041
AC113029.6	0.369075	0.0768013	0.762173	-0.416032	-0.491599	-0.502659	-0.0689548	0.516338	-0.12454	0.178533	0.632704	-0.727512	-0.15061	0.403866	1.02737	1.7972	-0.0600335	1.51007
AC113049.2	-3.65041	-2.10788	-3.03033	-3.65041	-3.12127	-3.07372	-3.15847	-3.20507	-3.65041	-3.65041	-3.65041	-3.65041	0.483781	0.887959	2.29513	-0.217118	-0.29931	2.86784
AC113055.2	-3.0727	-1.92984	-3.03033	-1.38687	-3.65041	-2.34341	-3.65041	-3.20507	-2.76156	-2.04619	-2.68906	-3.12543	-1.94636	-3.65041	0.781954	-3.65041	-0.29931	0.817632
AC113106.1	0.553865	-2.20588	-1.23104	-0.416032	-0.104694	-1.27827	-1.80221	-1.73029	-0.264455	0.859312	-0.830404	-2.55201	-0.520645	0.849257	0.71947	1.02632	-3.65041	2.55518
AC113182.4	3.15446	3.11639	2.89428	3.13485	3.13088	3.04664	3.01875	2.96839	3.00277	3.02915	2.97244	2.60684	2.94458	2.71379	2.2544	3.38558	3.46919	3.45113
AC113271.1	-0.946478	-1.52378	-0.955087	-2.48978	-1.83258	-0.774762	-1.27602	-1.96966	-1.75301	-1.33466	-1.60583	-1.15153	1.09066	1.42196	0.00621049	-1.7783	-2.0535	-0.179394
AC113276.3	0.240875	-0.524643	-0.221107	-0.585917	-0.154818	-0.372701	0.202534	-0.0749527	0.808643	-0.00334819	-0.101652	-0.354375	0.334034	-0.329992	1.44685	-0.927632	0.820114	-2.40958
AC113279.4	-1.22199	-0.787505	-2.26587	-3.65041	-0.837761	-3.65041	-3.65041	-3.65041	-0.653319	-3.65041	-1.47908	-0.128104	-0.24995	-3.65041	-3.65041	-3.65041	-3.65041	-3.65041
AC113299.3	0.738148	0.200547	0.576073	1.10161	0.681622	1.12254	0.454974	0.151403	0.477245	0.550732	0.119809	0.665525	1.61863	1.51239	1.85192	1.74055	0.0151437	1.2452
AC113316.2	0.283338	1.02128	0.35273	0.67212	0.643026	0.849277	0.556867	0.36648	0.800239	0.991931	0.363421	0.0333558	0.602449	1.20333	-0.390442	1.65373	0.628209	-0.960363
AC113474.3	0.136648	0.376776	0.35273	-0.193685	0.186732	-0.21366	0.352665	-0.430472	-0.00680129	-0.302541	-0.0784867	-0.0167805	1.40992	0.31926	1.44444	0.322626	-1.42338	-0.348576
AC113504.2	-2.10411	-1.28012	-1.76882	-0.0175587	-0.732517	-1.09826	-1.19897	-0.974984	-1.56756	-0.925568	-1.89859	-1.47687	-0.838592	0.3537	-2.55014	-0.417421	-0.754529	-3.65041
AC113945.3	-0.968453	-0.67094	-0.653935	-0.806885	-1.09613	-0.765134	-1.56273	-1.44368	-0.218189	-1.62876	-1.39083	-1.34292	-0.0309192	-3.65041	0.172872	0.940903	-3.65041	-0.815494
AC114005.5	4.17832	4.28301	3.90188	3.35786	3.78421	3.90105	4.12782	4.04523	3.89063	4.07382	3.91007	4.57581	2.51459	4.15961	2.12328	3.83385	2.982	4.04213
AC114008.1	-2.6613	-1.62862	-1.76882	-2.11394	-2.43057	-2.08204	-3.65041	-1.83017	-3.65041	-3.65041	-3.0911	-2.18802	-1.39837	-3.65041	0.961409	0.187874	-2.70898	-3.65041
AC114558.6	2.40272	2.62184	2.37684	3.08489	2.56284	2.44081	1.83901	1.78985	1.85471	1.92158	1.62723	1.90546	2.70302	2.77781	3.20787	4.19174	3.77134	3.1922
AC114603.1	1.39662	1.29111	0.863981	0.840124	1.50713	1.18098	1.44539	0.58719	1.44619	0.75205	1.14188	0.757883	1.82065	2.50749	2.98281	2.92632	3.01377	3.03768
AC114618.3	-0.00947314	-0.787505	-1.41621	-2.00036	-2.57476	-3.65041	-3.65041	-2.27681	-1.25577	-3.65041	-3.65041	-3.65041	5.14024	5.46468	7.34845	7.22121	7.03101	7.89656
AC114618.4	-3.65041	-3.65041	-3.65041	-3.65041	-3.65041	-3.65041	-3.65041	-3.65041	-3.65041	-3.65041	-3.65041	-3.65041	-1.00218	-1.25584	0.968143	0.385558	-0.586318	-3.65041
AC114666.6	-3.65041	-3.65041	-3.65041	-3.65041	-3.65041	-3.65041	-3.65041	-3.65041	-3.65041	-3.65041	-3.65041	-3.65041	0.0548351	-3.65041	0.662485	0.256823	0.558115	-0.348576
AC114920.2	4.50546	4.51738	4.71613	4.83676	4.87971	4.78617	4.97001	4.8096	4.89006	4.87216	4.84319	4.85365	4.75106	4.67763	4.3977	4.22094	4.13135	4.73474
AC114995.2	0.830132	0.97953	0.751219	0.267375	0.0409621	0.693909	0.0119801	0.1135	0.220161	-0.198005	0.354938	0.0431773	2.09211	1.22209	2.25989	2.87461	2.7216	2.62286
AC115293.2	-3.65041	-3.18301	-3.65041	-3.08949	-3.65041	-3.65041	-3.65041	-3.65041	-3.65041	-3.65041	-3.04546	-3.65041	0.135777	-0.719886	-1.70186	-1.72414	0.145146	-3.65041
AC115631.3	-0.298593	0.215768	0.592531	-0.372972	-0.166197	-0.699482	-0.980582	-1.26331	0.190456	-0.777583	-0.487569	-0.97265	-1.05511	-2.91715	-0.266694	1.37851	-3.65041	-0.634387
AC115631.4	1.08342	1.31427	1.17664	1.68738	1.51961	0.611314	0.524778	1.72471	1.31469	1.15871	1.63074	1.14523	-0.838592	-1.13154	0.576962	-3.65041	0.145146	-3.65041
AC115697.2	-2.07999	-0.810449	-1.16039	-0.324309	-0.634431	-1.70546	-1.31034	-1.12096	-1.3776	-1.29099	-1.10682	-1.24405	-3.65041	-3.65041	-2.20897	-0.0412639	-3.65041	-3.65041
AC115748.2	-3.65041	-3.65041	-3.65041	-3.65041	-3.65041	-3.65041	-3.65041	-3.65041	-3.65041	-3.65041	-3.65041	-3.65041	-2.84082	-3.65041	1.26467	0.322626	-1.42338	-2.04397
AC115777.3	1.51815	1.71325	1.5156	1.34456	1.58894	1.62904	1.7008	1.38624	1.9803	1.52733	1.95789	1.998	1.64928	0.666122	1.68824	1.51987	1.65913	0.286466
AC115818.1	-3.65041	-3.65041	-3.65041	-3.65041	-3.12127	-3.65041	-3.65041	-3.65041	-3.65041	-3.65041	-3.65041	-3.65041	-0.558353	-0.473565	3.23534	4.5511	3.32891	4.39093
AC115860.1	-0.36992	-0.286202	-0.49769	-0.460416	-0.0509702	-0.329492	-0.319691	-0.22227	0.249266	-0.191298	0.527169	-0.678264	-0.869859	0.093331	0.590118	-2.88472	1.03662	-3.65041
AC115896.3	1.78765	1.98049	1.57685	1.0339	1.44305	1.74811	1.20737	1.68262	1.87753	1.52529	1.84126	1.86589	1.53456	2.49982	-0.573907	1.43018	2.09009	1.33486
AC115901.1	-1.85864	-1.07173	-0.979208	-2.37205	-0.99121	-1.6691	-1.70769	-1.33487	-1.51069	-1.82243	-1.13045	-1.62454	-0.691679	-3.65041	-2.20897	0.0392277	-1.16443	1.82943
AC116151.2	-1.15746	-1.06252	-0.754426	-0.627486	-0.0042719	-0.765134	-0.667174	-0.487581	-0.942001	-0.71853	-0.709813	-1.40834	-0.323796	-3.65041	-0.47926	-3.65041	-2.70898	-3.65041
AC116677.2	-2.07999	-0.677956	-0.396775	-3.08949	-1.09613	-1.86085	-1.31034	-1.05042	-0.684433	-0.625183	-0.909957	-0.297489	-0.323796	-0.511808	-1.03035	-2.01789	0.695054	1.1354
AC116718.1	1.3057	1.33533	1.25886	1.3994	1.92012	1.09373	1.31261	1.40519	1.18942	0.843069	1.46917	1.67537	1.37367	1.51809	1.50126	1.14019	-0.104819	1.36862
AC116734.1	-3.65041	-3.65041	-2.26587	-3.65041	-3.65041	-3.65041	-3.15847	-3.65041	-3.65041	-3.65041	-3.65041	-3.65041	-3.65041	-1.89952	-3.65041	0.187874	-0.174717	0.903874
AC116772.2	1.95168	2.22763	2.34198	2.52704	2.19375	2.39753	1.98058	2.16262	2.16946	2.41797	2.02494	1.80802	1.72971	1.94394	1.56038	1.20793	2.03954	1.19819
AC116863	1.61369	2.26378	1.63958	1.1368	0.936929	2.34738	1.45052	1.73723	2.08779	1.62556	1.76487	1.02648	3.55688	3.12299	3.37301	3.89839	2.77046	4.02395
AC117574.2	-1.08365	-2.10788	-0.754426	-0.394341	-0.48446	-1.08623	-0.908707	-0.812932	-0.465958	-1.3054	-1.01599	-2.18802	-0.323796	-2.11808	0.337942	-3.65041	-3.65041	-3.65041
AC117623.1	-1.85864	-2.31102	-3.65041	-3.08949	-1.20927	-1.6691	-2.05031	-2.59044	-1.82053	-1.16738	-3.0911	-2.43832	0.544335	-3.65041	-3.65041	0.322626	-3.65041	-3.65041
AC117663.2	-0.762454	-0.982171	-0.515218	-0.0175587	-0.865317	-0.765134	-0.857057	-1.13915	-0.850939	-0.71853	-0.549926	-2.18802	-0.838592	-3.65041	-1.70186	-0.927632	-2.70898	-3.65041
AC117740.3	-3.65041	-3.65041	-3.65041	-3.65041	-3.65041	-3.65041	-3.65041	-3.65041	-3.65041	-3.65041	-3.65041	-3.65041	-3.65041	-0.329992	1.29176	1.99381	1.90483	2.17986
AC117750.1	-1.85864	-2.83056	-2.26587	-2.37205	-1.77919	-2.08204	-2.25792	-1.33487	-1.51069	-3.05578	-3.0911	-3.12543	4.8803	3.91778	5.63868	4.98368	4.85233	6.06172
AC117805.2	-0.0854819	-0.202887	-1.57257	0.325172	-0.0042719	0.0158707	-0.020798	-1.23369	-0.218189	-0.625183	-0.328804	-0.297489	-0.0757868	-0.551092	-0.675202	-2.01789	-3.65041	-1.12142
AC118022.3	-1.66678	-0.90606	-1.60974	-1.25072	-0.572559	-2.08204	-1.90336	-0.565373	-0.472731	-2.04619	-1.01599	-1.97479	-1.6465	-0.911079	-1.32738	-1.4802	-1.42338	-1.51017
AC118260.2	-1.08365	-0.735345	-1.24559	-0.193685	-0.236424	-0.794212	-0.453929	-0.0837322	-1.0392	-0.925568	-1.39083	-1.22036	-0.436313	0.27502	0.892282	-2.01789	-0.754529	-2.90052
AC118601.3	-0.0854819	-0.148278	0.0291387	0.188123	-0.715699	-1.08623	-0.743278	-0.430472	-0.218189	-0.100534	-0.811183	-0.727512	-3.65041	-3.65041	-2.55014	-2.38716	-0.944972	-3.65041
AC118627.1	7.48867	7.25018	7.36277	7.32492	7.3871	7.32927	8.22254	7.99919	7.84133	7.53919	7.77075	7.37821	6.24802	5.9981	5.73732	4.06914	6.46033	6.11014
AC118698.3	1.36621	1.62622	1.85271	1.81079	1.29532	1.49123	1.31824	1.36704	0.701402	1.327	1.69433	1.61739	1.90851	1.80617	1.9419	2.69868	1.90201	2.22579
AC118721.1	-0.548733	-0.636364	-3.65041	-0.132555	-3.65041	-0.260235	-0.108672	-1.05042	1.06866	0.372081	-3.65041	0.0135098	-3.65041	-0.364568	-3.65041	0.229638	-0.464583	-3.65041
AC119897.1	2.72886	2.64732	2.97496	3.2541	2.86349	2.79251	2.78814	3.17111	2.98434	2.77036	3.14228	2.95131	3.15241	2.44097	3.04145	2.59598	3.57058	3.4222
AC119897.2	-0.762454	-1.07173	-0.754426	-1.38687	-0.801819	-0.584956	-1.56273	-1.05042	-1.14342	-1.45804	-1.01599	-1.97479	-0.219423	-0.138317	0.486049	1.3409	-0.0600335	-3.65041
AC120377.3	-0.224003	-0.432773	-0.0326237	0.0043802	-0.634431	-0.0883197	-0.848625	-0.641104	-0.684433	-1.04141	-0.487569	-0.646342	0.763941	0.444378	-2.99783	0.854561	0.558115	-1.48804
AC120413.2	-0.582226	0.78661	0.695167	0.489739	0.141299	0.6834	-0.823623	0.158865	-0.218189	-0.100534	0.0843246	0.34263	0.483781	0.82798	-0.390442	-0.126513	-0.944972	-3.65041
AC120860.1	-1.75952	-1.31251	-0.429635	-3.65041	-0.819678	-3.65041	-0.479737	-3.65041	-3.65041	-3.65041	-3.65041	-3.65041	-3.65041	-3.65041	-3.65041	-1.5258	-3.65041	-3.65041
AC121113.1	4.47475	4.20817	4.2687	4.46655	4.2948	4.38811	4.32051	4.11978	4.1928	4.24245	4.21114	4.28927	4.19822	4.56938	4.6357	4.80557	4.8302	4.38345
AC121131.6	-2.28532	-1.62862	-1.44952	-2.06743	-2.08994	-1.30592	-1.67751	-3.16726	-1.92813	-1.01749	-2.62053	-2.70801	-3.65041	-3.65041	0.86006	-1.05555	-0.0822524	-3.65041
AC121564.2	0.412233	0.474926	0.534085	0.450324	-0.92206	0.275785	0.646081	0.657362	0.0415375	-0.100534	0.271754	0.457256	1.16196	-0.473565	-2.55014	-0.126513	1.32109	0.903874
AC121575.1	-1.75952	-3.65041	-0.703306	-3.65041	-2.76927	-3.65041	-0.735485	-3.65041	-1.29125	-0.563257	-1.29426	-0.50367	-3.65041	-3.65041	-1.68063	-3.65041	-3.65041	0.41538
AC121576.1	1.96624	2.15349	1.83726	2.2223	1.84701	1.7261	1.04717	0.780992	1.0067	0.980096	1.08146	0.511325	1.41965	1.34273	1.06555	1.79488	0.989464	3.09838
AC121578.1	-3.65041	-3.65041	-3.65041	-3.65041	-3.12127	-3.65041	-3.65041	-3.65041	-3.65041	-3.65041	-3.65041	-3.65041	-3.65041	-2.37576	0.662485	-3.65041	-1.42338	1.06228
AC121814.4	-1.85864	-2.10788	-1.57257	-0.627486	0.50636	-2.08204	-2.7923	-2.16079	-1.65731	-3.05578	-2.37498	-3.65041	-3.65041	-3.65041	-0.78415	-0.927632	-3.65041	-3.65041
AC121823.2	-1.57964	-1.25893	-1.38365	-0.569619	0.0109642	-1.09826	-1.28737	-2.14233	-3.13859	-1.52392	-1.34865	-1.28034	0.585259	-0.831537	1.30246	2.34204	0.237739	-3.65041
AC121838.2	-0.277865	1.16543	0.534085	0.67212	-0.414942	0.651406	-0.0689548	0.195609	-0.399914	0.330741	0.632704	0.630123	0.81399	0.362183	0.43835	-0.126513	1.59055	0.945136
AC121845.3	-0.422034	-0.537346	-0.967097	-0.769176	-0.291432	-0.774762	-0.296571	-1.31406	-1.3154	-1.3054	-0.549926	-1.1293	-1.4447	0.00399943	0.495403	-3.65041	-1.73919	0.0421496
AC121888.2	-0.582226	0.734722	-0.310088	-0.193685	0.355379	0.133773	0.157203	0.266404	0.555898	-1.04141	0.183478	-0.569496	0.483781	1.17953	1.78676	1.02237	1.59055	-0.451914
AC121934.1	-1.66678	-1.16722	-3.03033	-1.89508	-1.61426	-1.6691	-2.25792	-1.98603	-1.65731	-1.62876	-0.631865	-1.62454	-0.122095	-0.633022	-0.0814637	-2.88472	0.0462007	0.861398
AC122037.2	1.86735	1.24177	2.16483	2.35415	2.09712	2.19542	1.86359	1.27045	1.6313	1.21027	1.1808	1.14523	1.9694	3.17146	2.15461	1.54765	1.55501	-0.451914
AC122037.7	0.817345	0.804339	0.376686	1.15162	0.681622	0.842995	0.603701	0.93887	1.03562	0.485256	1.06074	0.623591	0.823795	0.283977	-1.27874	-0.650089	0.746386	-3.65041
AC122186.1	-0.79154	0.253132	-1.43277	-0.741528	0.665666	-0.61059	0.582034	1.29606	0.0415375	-0.63425	-0.342537	0.937127	-1.46844	1.21976	-0.926774	0.250075	1.41925	-3.65041
AC122248.4	-0.762454	-0.67094	-0.559991	-0.714399	-0.166197	-0.280665	-1.70769	-1.44368	-2.76156	-2.04619	-0.631865	-0.904989	0.602449	1.05424	1.98238	2.21785	1.40335	2.64807
AC122321.1	-1.20885	-1.94669	-0.979208	-1.7781	-1.33206	-1.08623	-1.43102	-1.68951	-2.0046	-1.16738	-1.89859	-1.34292	0.483781	0.595928	1.05926	2.51385	2.43329	0.00360757
AC122339.3	-3.65041	-3.65041	-3.65041	-3.65041	-3.65041	-3.65041	-3.65041	-2.77719	-3.65041	-3.65041	-3.65041	-3.65041	0.334034	-0.451097	-3.65041	-0.0832588	-3.65041	-3.65041
AC122348.1	-3.0727	-1.92984	-2.59805	-2.68663	-1.96544	-3.07372	-2.50051	-2.86527	-3.13859	-3.05578	-3.65041	-2.74135	-2.84082	-3.09152	-1.03035	-2.38716	0.695054	-0.161764
AC122365.4	-2.34156	-3.65041	-1.99605	-3.65041	-2.73497	-2.13067	-3.15847	-3.65041	-2.76156	-3.65041	-3.65041	-3.65041	0.427021	-3.65041	0.674887	-2.38716	-3.65041	-3.65041
AC122400.3	-3.65041	3.1169	-3.65041	2.36479	-3.65041	-3.65041	3.19426	3.04187	-3.65041	2.79252	-3.65041	-3.65041	3.73501	3.78251	4.40671	3.76214	3.76669	-3.65041
AC122423.2	4.24667	4.33773	4.61427	4.48593	5.24593	4.73684	4.34576	4.29974	4.31582	4.07521	4.23705	4.35654	4.66914	4.52992	4.37918	4.38816	4.76168	4.37969
AC122438.1	2.35375	2.83151	1.69969	2.1355	2.57912	2.6214	1.46919	2.55294	2.82016	2.0303	1.93246	2.81822	-3.65041	-3.65041	-3.65041	-1.19593	-3.65041	-3.65041
AC122462.1	2.25882	2.44423	2.67997	2.47692	2.59521	2.14524	2.0888	2.11833	2.09926	2.21077	2.38092	2.77098	1.92454	2.28129	2.92514	2.1415	1.69223	2.61009
AC122514.1	-3.65041	-3.65041	-3.65041	-3.65041	-3.65041	-3.65041	-3.65041	3.52518	-3.65041	-3.65041	-3.65041	1.67853	-3.65041	-3.65041	-3.65041	3.21501	-3.65041	-3.65041
AC122767.2	-1.08365	-0.897846	-1.10626	-0.806885	-1.46627	-0.502659	-1.56273	-1.98603	-1.14342	-2.63594	-2.11721	-1.97479	-0.558353	0.403866	-3.65041	-0.927632	-3.65041	-3.65041
AC122789.1	1.62106	2.2546	1.79876	1.52233	1.36417	1.32315	1.15383	0.983681	0.261563	1.50685	1.15416	1.16561	2.3274	-0.21827	1.5825	1.20094	1.89349	0.98525
AC122871.5	-2.34156	-3.18301	-2.59805	-1.53722	-2.73497	-3.07372	-3.15847	-2.16079	-2.76156	-2.31113	-3.0911	-3.65041	-3.65041	-0.911079	0.620357	-3.65041	-0.29931	-3.65041
AC122915.2	-2.89384	-3.65041	-2.20772	-3.65041	-2.8404	-3.65041	-3.65041	-3.65041	-3.65041	-3.65041	-3.65041	-3.65041	-3.65041	-3.65041	0.51393	4.04254	4.44081	4.34658
AC123068.2	-3.65041	-3.65041	-3.03033	-3.65041	-3.65041	-3.65041	-3.65041	-2.86527	-3.65041	-3.65041	-3.65041	-3.65041	-3.65041	-0.812318	-0.0814637	0.612972	0.324745	0.409495
AC123613.3	-0.055772	1.10336	-0.634651	-0.270632	-0.0404614	-0.130961	-0.499401	-0.364797	-0.072165	0.605682	0.354938	-0.386974	0.538393	0.893822	0.21877	-0.564322	-0.393405	-0.634387
AC123647.1	-3.65041	-3.65041	-3.65041	-3.65041	-3.65041	3.37084	-3.65041	-3.65041	-3.65041	-3.65041	-3.65041	2.95976	-3.65041	-3.65041	-3.65041	-3.65041	-3.65041	-3.65041
AC123650.4	-2.07999	-2.54753	-3.03033	-3.08949	-3.12127	-2.34341	-1.86885	-2.16079	-3.65041	-3.05578	-2.37498	-3.12543	-3.65041	-3.09152	0.961409	0.55939	-2.70898	-3.65041
AC123679.2	2.59386	2.92245	2.49427	2.50508	2.87325	2.60014	3.03308	2.90213	3.20359	2.68089	2.73893	2.85214	3.1889	3.0709	3.252	2.79687	2.9699	2.67897
AC123684.1	5.28907	5.14929	4.75594	4.71731	4.55513	4.575	4.91521	5.10094	4.84498	4.78344	4.6378	4.77681	4.34161	4.74992	3.62974	4.32092	3.99872	3.28431
AC123686.3	-1.34595	-1.03524	-0.325467	-0.926313	-0.0042719	-0.149629	-0.479737	-1.20467	-0.684433	-0.818338	-0.0784867	-0.562032	-0.838592	-1.39187	-1.93324	0.55939	0.145146	-0.451914
AC123686.4	3.64979	3.73705	4.01762	4.19241	4.60409	3.87473	3.94015	4.05901	4.0957	3.98557	3.90136	4.13967	3.08267	2.49982	2.48317	2.42677	2.95906	3.27057
AC123686.7	-3.65041	-3.65041	-3.65041	-3.65041	-3.65041	-3.65041	-3.65041	-3.65041	-3.65041	-3.65041	-3.65041	-3.65041	0.0548351	-3.65041	-3.65041	-3.65041	-0.0600335	-3.65041
AC123813.2	-0.669527	-0.0539922	-0.754426	-0.545513	-0.893409	-1.21138	-0.667174	-1.05042	-0.850939	-1.82243	-1.01599	-0.813523	-0.323796	-3.65041	-2.20897	-3.65041	-2.70898	-3.65041
AC123830.1	-3.65041	-3.65041	-3.65041	-3.65041	-3.65041	-3.07372	-3.65041	-3.65041	-3.65041	-3.65041	-3.65041	-3.65041	-0.122095	0.699979	2.51801	2.59598	2.60651	3.568
AC123848.4	-1.66678	-2.10788	-1.76882	-2.11394	-1.20927	-1.34842	-1.31034	-2.59044	-1.51069	-0.625183	-1.39083	-2.43832	-0.838592	-3.65041	1.74815	0.385558	-0.29931	-3.65041
AC123856.2	-1.66678	-1.99845	-1.94765	-2.34406	-3.07764	-1.48399	-0.917498	-1.53705	-1.25577	-1.76155	-2.31961	-1.77174	-0.169939	-1.46502	1.94873	-0.0330096	0.628209	0.627949
AC123856.3	-3.0727	-3.18301	-1.8115	-3.65041	-3.65041	-3.12206	-3.65041	-2.86527	-3.09613	-3.05578	-3.65041	-3.65041	0.789183	-0.296225	1.7579	1.99784	-0.186703	-3.65041
AC124347.2	-2.6613	-3.65041	-3.65041	-3.65041	-3.65041	-2.66284	-3.65041	-3.65041	-3.13859	-3.65041	-2.11721	-2.18802	-3.65041	-0.399993	0.113367	-3.65041	-3.65041	-3.65041
AC124389.1	-2.07999	-1.07173	-2.26587	-2.68663	-0.48446	-1.49987	-2.50051	-1.13915	-0.399914	-1.45804	-1.13045	-0.646342	-2.32536	-3.65041	-3.65041	-0.217118	-2.14408	-3.65041
AC124389.3	-0.348149	0.484383	-0.348847	0.524316	-0.0615561	0.0214442	-0.202248	-1.30376	-0.0773178	-0.948004	-1.06069	-0.510837	-0.719889	-0.70209	-3.65041	-0.472166	-1.07261	-3.65041
AC124457.2	-1.09569	-1.77138	-0.683355	-0.394341	-0.260613	-1.21138	-3.15847	-2.1241	-1.14342	-2.7107	-0.93055	-2.28299	2.09211	1.50091	3.45978	2.15782	2.35897	2.26217
AC124550.3	-1.34595	-1.37955	-0.471792	-0.714399	0.0943888	-0.280665	-0.823623	0.158865	-0.108627	-1.04141	-0.328804	-1.34292	-3.65041	0.182251	0.576962	-2.88472	2.20922	-1.75252
AC124566.2	2.0547	2.6046	2.50409	2.30969	2.16679	2.51676	2.45597	2.75109	2.66063	2.52875	2.74949	2.41216	1.5044	0.472075	1.89673	1.51987	2.78588	-0.815494
AC124604.3	-3.65041	-3.65041	-3.65041	-3.65041	-3.65041	-3.65041	-3.65041	-3.65041	-3.65041	-3.65041	-3.65041	-3.65041	6.77291	6.22999	7.60355	6.43383	6.66155	7.3453
AC124713.2	3.66325	3.91951	4.07768	4.06773	4.23658	3.99363	3.92209	3.53274	3.83721	3.65897	3.71048	3.63845	3.95282	4.0006	3.36218	3.97763	3.57857	3.17582
AC124730.5	-1.85864	-1.36816	-1.00374	-2.37205	-0.99121	-2.25991	-2.25792	-1.13915	-2.40997	-2.31113	-3.65041	-2.99911	1.27706	-0.466037	-3.65041	-3.65041	-0.539456	-3.65041
AC124730.7	3.56723	4.02345	2.51924	3.42752	-1.74466	1.8298	4.13714	4.53029	4.10255	3.70149	4.39305	4.72227	-3.65041	-3.65041	-3.65041	-0.245447	-3.65041	-3.65041
AC124976.1	0.301816	0.234571	-0.228316	0.320807	-0.121209	1.03982	1.32011	1.34595	0.601755	0.734546	-0.764221	-0.630642	1.43892	-1.52633	1.15385	-0.32383	-3.65041	-0.101704
AC124992.1	-1.34595	-0.148278	-0.235561	-1.0118	-0.801819	-0.21366	-1.00849	-1.56137	-2.0046	-1.3054	0.405106	-0.122604	0.420574	-3.65041	0.532222	-0.927632	0.324745	-1.12142
AC125047.1	-1.85864	-2.10788	-2.26587	-2.37205	-1.61426	-1.42216	-3.15847	-2.86527	-3.13859	-3.05578	-2.68906	-3.65041	0.212418	-0.205678	2.28168	0.503742	0.558115	-0.451914
AC125061.1	3.9128	3.88512	3.7926	3.70334	3.74754	3.87011	3.79837	3.66571	3.85996	4.0145	3.72948	3.90602	3.8189	4.19149	3.39191	3.28518	2.7264	3.66874
AC125065.1	2.21196	2.18573	2.36731	1.837	1.92415	2.15542	1.9507	1.94896	1.64857	1.91693	2.31466	1.49749	1.29831	1.87744	1.97905	1.70644	1.81452	3.3426
AC125166.1	-3.65041	-3.65041	-3.65041	-3.65041	-3.65041	-3.65041	-3.65041	-3.65041	-3.65041	-3.65041	-3.65041	-3.65041	1.87824	0.083104	2.60699	2.14696	2.10246	2.92051
AC125319.1	-2.6613	-3.65041	-3.65041	-3.65041	-3.12127	-3.65041	-2.50051	-3.65041	-3.65041	-3.65041	-3.65041	-3.65041	1.64652	1.33844	3.25544	4.32895	4.19047	3.82169
AC125319.2	-3.0727	-1.62862	-3.03033	-1.53722	-0.99121	-2.66284	-3.15847	-3.20507	-2.21564	-2.63594	-3.0911	-2.74135	-0.122095	0.444378	1.12099	0.256823	0.484441	-0.348576
AC125319.3	-0.762454	-0.742682	-0.979208	-2.68663	-1.33206	-0.97107	-2.05031	-1.68951	-1.51069	-2.63594	-1.89859	-1.97479	0.658313	1.10567	-0.573907	0.714511	0.484441	-0.683854
AC125349.3	-3.65041	-3.65041	-3.65041	-3.65041	-3.65041	-3.65041	-2.50051	-3.20507	-3.65041	-3.65041	-3.65041	-3.65041	-3.65041	-3.65041	-0.152728	-0.782197	-2.70898	0.220779
AC125354.1	-3.65041	-3.65041	-3.65041	-3.65041	-3.65041	-3.65041	-3.65041	-3.65041	-3.65041	-3.65041	-3.65041	-3.65041	0.544335	-2.6897	1.56038	1.06144	1.48117	2.40357
AC125458.2	-1.66678	-1.58841	-0.471792	-2.11394	-2.17934	-0.424803	-0.667174	-1.23369	-1.82053	-1.44203	-1.70878	-0.904989	-0.122095	0.0308525	-0.152728	-0.650089	-1.42338	-3.65041
AC125459.1	-2.6613	-3.18301	-3.65041	-1.70508	-2.43057	-3.07372	-3.65041	-3.20507	-1.82053	-1.82243	-3.65041	-3.12543	0.0548351	-1.0171	1.72846	1.88911	1.32109	2.0345
AC126278.2	-3.65041	-3.65041	-3.65041	-3.65041	-3.65041	-3.65041	-3.65041	-3.20507	-3.65041	-3.65041	-3.65041	-3.65041	-2.84082	0.444378	-3.65041	-3.65041	-0.174717	-3.65041
AC126445.2	-1.66678	-1.37955	-0.754426	-0.714399	-1.46627	-2.66284	-0.999124	-2.35968	-2.0046	-1.3054	-1.89859	-3.65041	-0.219423	-3.65041	1.12099	-3.65041	-3.65041	-3.65041
AC126800.1	-3.0727	-3.65041	-2.26587	-3.08949	-3.12127	-2.66284	-1.70769	-2.59044	-1.65731	-2.04619	-3.65041	-3.12543	0.680066	-3.65041	-0.902003	0.137572	-1.16443	-0.563228
AC126938.1	6.79126	6.81587	6.68781	6.751	6.70382	6.79077	6.55188	6.5186	6.33737	6.425	6.43997	6.25908	7.22356	7.19179	7.19006	7.21114	7.24544	7.24767
AC127252.4	-0.762454	-0.818179	-1.10626	-0.257519	-1.33206	-0.51068	-1.88601	-1.68951	-1.82053	-1.3054	-0.549926	-1.62454	-2.32536	-0.399993	0.113367	-0.782197	0.324745	0.220779
AC127252.5	1.56097	1.31956	1.22759	1.16872	1.42988	1.02047	0.892307	0.863232	1.16781	0.0986897	0.663946	0.600496	2.16527	1.66074	1.92469	2.32448	-2.14408	1.36862
AC127266.4	-0.821225	-0.90606	-0.506427	-0.483131	0.0459017	-0.823889	-0.645104	0.269854	0.416223	-0.563257	-0.820761	-0.291305	-3.65041	-3.65041	-0.685734	-2.26613	-3.65041	-3.65041
AC127297.4	-2.6613	-2.10788	-2.59805	-2.68663	-2.73497	-2.66284	-2.05031	-3.20507	-2.0046	-1.82243	-1.89859	-2.43832	2.65851	3.33661	4.46768	4.76147	4.68153	4.73474
AC127300.3	0.788153	0.697257	1.14909	1.24902	1.74895	1.18098	1.18291	1.28757	1.37252	1.50685	1.39456	1.35691	1.84974	0.762197	2.28168	-0.126513	1.84427	-0.815494
AC127308.2	0.0298542	0.157842	-0.388676	0.0889445	-0.0042719	-0.424803	0.423993	0.683467	0.555898	0.183702	0.918303	0.528907	-1.00218	-1.54207	-0.306776	0.98221	-0.174717	-3.65041
AC127333.1	5.76644	5.74654	5.59364	5.78005	5.58951	5.61445	5.42324	5.28855	5.1479	5.39026	5.2639	5.27648	6.02101	6.21273	5.80424	6.16835	6.21408	5.42238
AC127338.1	-3.65041	-3.65041	-3.65041	-3.65041	-3.65041	-3.65041	-3.65041	-3.65041	-3.65041	-3.65041	-3.65041	-3.65041	0.313304	-3.65041	-3.65041	-3.65041	1.17887	1.74316
AC127339.2	3.9128	3.98177	3.5445	3.91431	3.16079	3.60044	3.92486	3.7515	3.63507	3.65386	3.61558	3.69756	3.0621	3.90332	1.84279	3.66148	3.19675	3.71241
AC127347.1	1.58568	1.66832	1.99105	1.19041	2.11837	1.90409	1.67764	2.09421	2.00611	1.77688	2.28035	1.53277	2.86015	2.23238	2.61022	2.57183	1.61493	2.43867
AC127556.1	1.72399	1.2287	1.72976	1.24211	2.78885	1.9733	1.27838	1.19079	1.28688	0.72394	0.694526	0.706275	1.82554	1.89801	1.98901	-3.65041	1.82947	0.409495
AC127556.10	-0.0324368	-1.07173	0.139667	-0.635945	0.432844	-0.149629	-0.025542	-0.553128	-0.472731	-0.462916	-0.413231	-0.0218913	-1.94636	0.0308525	0.113367	-0.333934	0.484441	0.633008
AC127556.5	1.17648	1.11559	1.86462	1.70088	1.80246	1.18347	1.48094	1.51974	1.90392	1.24035	1.65168	1.75223	1.09066	1.56478	1.99067	0.19492	1.45441	-0.517666
AC127677.1	-0.990768	-0.0403662	-0.235561	-0.372972	0.513509	-0.402243	-0.428575	-0.317431	-0.895751	-0.309786	-1.89859	-1.44907	1.29479	-0.783961	-1.5025	1.13288	-2.14408	0.467287
AC129014.2	-3.65041	-3.65041	-3.03033	-2.68663	-3.12127	-3.07372	-3.65041	-2.86527	-3.13859	-3.65041	-2.68906	-3.65041	-3.65041	-3.65041	-0.306776	-0.927632	-0.29931	-3.65041
AC129188.1	4.53505	4.57403	4.30691	4.30442	4.41421	4.33567	4.53706	4.563	4.35962	4.63804	4.36718	4.24422	4.11582	3.97421	3.48465	3.46057	3.71448	3.51418
AC129337.1	-0.422034	-1.62862	-0.653935	-1.12632	-1.46627	-2.66284	-1.70769	-1.33487	-1.82053	-1.62876	-1.89859	-2.43832	4.23589	3.79783	6.03822	6.07191	5.77895	6.54699
AC130680.12	-0.678555	-0.537346	0.563604	0.446322	0.273519	-0.350935	-0.823623	-0.96684	-0.108627	-0.454861	-0.398812	0.174088	-0.691679	0.083104	0.576962	0.961704	-2.70898	1.31611
AC130827.2	3.92775	3.82993	3.73214	3.98532	3.55612	3.65525	3.47431	3.91522	3.8505	3.88285	3.89771	4.01982	4.39273	3.84399	4.24318	3.89299	3.75499	4.19491
AC130827.4	-3.65041	-2.10788	-3.03033	-3.65041	-1.61426	-1.6691	-2.25792	-1.56137	-2.0046	-1.82243	-2.11721	-1.97479	-0.558353	-0.812318	0.23002	-2.88472	-1.42338	0.576358
AC131065.2	5.87426	5.91657	5.73343	5.79527	5.39962	5.57188	6.17298	6.25159	6.0357	5.83921	5.8995	6.11454	5.10599	5.4985	4.84202	5.16726	5.06186	5.07417
AC131592.3	-0.86178	-0.00906394	-0.471792	-0.0739116	-0.557497	-0.280665	-1.09559	-1.05042	-0.942001	-0.302541	-1.01599	-0.813523	0.862361	-0.719886	0.961409	2.05316	2.75488	2.47575
AC131679.2	0.407975	0.189025	0.150824	0.426147	1.28282	-0.432402	0.89482	0.5677	0.565848	0.316693	0.469395	0.560024	0.514376	0.655809	0.523105	0.475091	0.867253	1.30981
AC131791.1	2.62721	2.70644	2.55011	2.48669	2.7859	2.636	2.36011	2.49442	2.46804	2.49795	2.60583	2.47155	2.53712	2.15882	2.88389	1.75014	2.73754	3.05663
AC131803.2	0.454138	-0.0403662	0.400251	-0.331161	0.239428	0.66215	-0.154701	0.0345695	0.572443	-0.925568	0.0320694	-0.769877	-0.558353	-0.0233629	-0.830143	-0.313796	1.44278	2.02684
AC131980.1	-2.07999	-1.92984	-3.65041	-1.12632	-1.92621	-1.6691	-0.999124	-1.56137	-1.11136	-1.647	-1.39083	-0.813523	0.0296397	-2.37576	0.819675	-3.65041	-3.65041	-3.65041
AC131992.1	1.61369	1.73982	1.53701	0.979555	0.610054	0.6834	1.01519	0.98578	0.379085	1.15871	1.25106	1.41479	-0.558353	0.666122	0.113367	-0.417421	0.820114	0.00360757
AC132148.3	-1.66678	-1.49872	-0.862444	-1.38687	-0.893409	-0.864431	-0.170377	-1.13915	-0.108627	-0.53751	-0.909957	-0.178576	0.0548351	-1.54207	-0.573907	-1.72414	-0.29931	-3.65041
AC132229.1	-0.68764	-0.914322	-1.43277	-1.41572	-1.83258	-0.993377	-0.601951	-0.834997	-0.868697	-0.728206	-0.727722	-1.023	0.712094	-1.16772	-2.67049	-0.135322	-1.42338	-0.857448
AC132242.1	-1.08365	-0.100365	-0.653935	-0.0681762	-0.715699	0.233189	-0.279472	-0.812932	-0.00680129	-0.302541	-0.328804	-0.297489	-0.558353	-3.65041	0.620357	-0.782197	-1.16443	0.576358
AC132303.1	1.21111	1.51218	1.37995	0.56548	1.15835	1.3027	1.28797	1.18166	1.16998	1.10523	0.859543	1.14523	2.45275	1.71473	2.72102	0.854561	1.90483	1.09931
AC132448.1	-0.696782	-1.31251	-1.30533	-2.04473	-0.505986	-1.39221	-1.73851	-2.00258	-1.40326	-1.61075	-3.13822	-3.65041	0.86711	0.555813	1.25368	0.469292	-1.48125	0.367618
AC132584.3	-1.20885	-1.77138	-1.39984	-2.37205	-1.77919	-2.08204	-0.999124	-0.0403595	-0.684433	0.0199587	-0.71874	-1.00265	-1.6465	-3.65041	0.856435	-2.88472	-3.65041	-3.65041
AC132685.1	-1.49747	-0.537346	-1.99605	-2.13777	-2.43057	-1.90246	-2.61025	-1.98603	-2.21564	-1.76155	-2.11721	-1.97479	-2.32536	-0.407184	-1.03035	-0.313796	-1.73919	0.467287
AC132837.2	-0.422034	-0.474919	0.303591	-0.394341	-0.48446	-0.584956	-0.460338	0.082444	-0.399914	-0.71853	-0.909957	-0.427092	-3.65041	-0.473565	-3.65041	-3.65041	-1.42338	-1.75252
AC133502.2	-3.65041	-3.65041	-3.65041	-3.65041	-3.65041	-3.65041	-3.65041	-3.65041	-3.65041	-3.65041	-3.65041	-3.65041	4.82828	4.37087	6.04649	5.94185	5.55434	6.72604
AC133523.2	-2.37053	-1.30163	-2.29585	-0.957781	-1.03227	-0.424803	-1.53541	-1.32442	-1.27933	-1.00567	-1.63933	-1.07517	0.256521	0.0361636	-2.1789	-0.552475	-1.31416	-3.65041
AC133902.3	-1.49747	-1.37955	-0.754426	-0.905709	-1.34493	-1.49987	-1.31034	-0.271572	-1.51069	-1.16738	-1.01599	-0.427092	-3.65041	-3.65041	-1.32738	-1.2716	-0.174717	-3.65041
AC134246.2	7.50431	7.52033	7.33903	7.32971	7.28409	7.31916	7.56111	7.69386	7.57318	7.63844	7.53168	7.55755	7.00667	7.20198	7.12625	7.04223	7.05626	6.7051
AC134411.2	1.51617	1.58285	1.89313	1.63737	2.03637	1.68279	1.34972	1.45605	1.01398	1.39543	1.63074	1.24008	2.09008	1.85658	2.57867	1.95283	1.40335	3.568
AC134570.1	-1.49747	-1.77138	-0.310088	-1.38687	-1.69437	-2.66284	-2.05031	-1.83017	-0.542278	-1.62876	-0.909957	-1.47687	-1.6465	-3.65041	0.927259	-3.65041	-3.65041	-3.65041
AC134581.3	-3.65041	-3.18301	-3.65041	-2.68663	-3.65041	-3.65041	-3.15847	-3.65041	-3.65041	-3.65041	-3.65041	-3.65041	0.212418	1.66418	2.77961	2.12868	2.81623	2.84622
AC134584.1	-3.65041	-2.54753	-3.65041	-3.65041	-3.65041	-3.65041	-3.65041	-3.65041	-3.65041	-3.05578	-3.0911	-2.74135	1.08252	-0.551092	0.28499	0.714511	0.628209	1.06228
AC134613.2	-1.34595	-0.474919	-0.471792	-0.394341	-0.557497	0.133773	-1.43102	-0.375537	-0.399914	-1.45804	-1.01599	-1.62454	6.34312	6.47577	7.96351	7.56051	7.55594	8.12214
AC134827.3	-0.499908	-1.16722	-1.10626	-0.806885	-1.33206	-0.864431	-0.823623	-0.322618	0.0883091	-0.232015	-1.13045	-1.00265	-1.94636	-2.11808	0.0513017	0.322626	2.36103	2.23081
AC135079.3	-0.669527	-0.357627	-1.24559	-0.545513	-0.348621	-0.21366	-0.823623	-1.05042	-1.14342	-0.818338	-1.25477	-0.0167805	1.16196	0.083104	1.02737	-1.08939	-2.14408	1.59029
AC136146.4	1.24969	0.983982	1.02119	1.30754	1.67276	1.18595	0.600625	0.444881	0.53241	0.485256	0.481136	0.431313	0.963391	-3.65041	0.0513017	-0.0412639	0.164146	2.56183
AC137513.1	1.05647	0.680897	0.805175	1.20943	0.820692	0.535435	0.3852	0.195609	0.412552	-0.63425	0.853533	0.0234669	0.544335	1.69808	-1.03035	0.187874	0.733723	-3.65041
AC138218.2	-3.0727	-2.83056	-3.65041	-3.65041	-3.65041	-3.07372	-3.65041	-3.65041	-3.65041	-3.65041	-3.65041	-3.65041	-3.65041	0.559507	0.961409	-3.65041	-2.70898	-3.65041
AC138368.1	-3.65041	-3.65041	-3.03033	-3.65041	-3.12127	-3.65041	-3.65041	-3.65041	-3.65041	-3.65041	-3.65041	-3.12543	2.11625	2.65459	3.03345	1.27594	2.75488	3.06789
AC138640.3	-3.65041	-3.65041	-3.65041	-3.65041	-3.65041	-3.65041	-3.65041	-3.65041	-3.65041	-3.65041	-3.65041	-3.65041	2.24953	2.01291	4.30433	3.98222	3.95165	4.69599
AC139063.1	-0.892962	-2.07047	-2.49013	-3.65041	0.00590338	-2.03501	-2.17126	-2.72132	-3.65041	-3.65041	-3.65041	-3.65041	-3.65041	0.0255217	0.241183	-3.65041	-3.65041	-3.65041
AC139063.2	2.49895	2.3291	2.35289	2.48181	2.32957	2.47371	2.20574	2.17923	1.73342	1.99398	1.95228	1.98405	3.00723	2.51512	2.49604	3.65255	2.85035	2.34312
AC139064.2	2.74667	2.44585	2.72732	2.59458	2.38909	1.92356	2.2496	2.41172	2.20703	2.25319	2.39133	2.5927	2.0129	2.71214	1.55368	0.296664	2.4965	1.33486
AC139131.2	-3.0727	-3.65041	-3.65041	-3.65041	-3.65041	-3.65041	-3.65041	-3.65041	-3.65041	-3.65041	-3.65041	-3.65041	-0.838592	-1.13154	0.819675	2.23504	1.59055	2.54448
AC139571.2	-1.85864	-0.100365	-1.14667	0.139386	-0.893409	-0.350935	-1.31034	-1.44368	-1.65731	-1.04141	-1.54106	-1.00265	0.420574	0.27502	-0.390442	0.385558	0.878801	-3.65041
AC139636.2	-0.669527	-0.158054	-0.489006	-1.02286	-1.77919	-0.350935	-0.999124	-2.16079	-0.960924	-0.454861	-2.11721	-1.22036	0.763941	-1.25584	-0.47926	1.13654	0.237739	-2.90052
AC139867.2	0.373449	0.376776	0.695167	0.894002	0.706792	0.348537	0.588258	0.489954	0.713388	0.586297	0.560755	0.693859	-0.436313	-1.25584	1.34447	-1.50282	1.18818	1.87284
AC140190.2	0.18722	-0.357627	0.199988	-0.0175587	-0.0042719	-0.584956	0.277627	-0.193477	0.220161	0.183702	0.0320694	0.128686	0.763941	1.20333	3.08856	2.52787	3.14269	1.09931
AC140205.5	-2.59143	-3.14363	-3.65041	-3.65041	-3.65041	-3.65041	-3.11738	-2.80596	-3.65041	-3.65041	-3.65041	-3.65041	-3.65041	0.32361	-3.65041	-3.65041	0.154677	-3.65041
AC140321.1	6.40255	6.34865	6.13885	6.51469	5.54278	5.93844	6.283	6.19889	6.2932	6.09431	6.13852	6.242	5.12048	5.90392	4.80746	4.58501	5.14012	4.64681
AC141209.3	-2.34156	-2.83056	-3.03033	-3.08949	-2.43057	-2.34341	-2.50051	-2.35968	-2.21564	-2.31113	-2.37498	-1.78906	-0.691679	0.133529	-3.65041	-3.65041	-3.65041	-0.252149
AC141883.1	-2.20486	-1.19715	-0.979208	-0.905709	-2.04723	-1.68716	-1.39375	-1.33487	-1.29125	-2.04619	-1.72667	-1.08583	2.02783	-0.421674	1.49661	0.515044	-1.14092	1.5018
AC142101.2	-3.65041	-3.65041	-3.65041	-3.65041	-3.65041	-3.65041	-3.65041	-3.65041	-3.65041	-3.65041	-3.65041	-3.65041	-3.65041	-3.65041	-3.65041	0.44586	0.461585	2.58942
AC144779.1	-1.68486	-2.18574	-3.65041	-3.65041	-1.14033	-1.74277	-3.65041	-3.65041	-0.668792	0.330741	-3.65041	-1.56364	-3.65041	0.790758	1.0306	-3.65041	-3.65041	-3.65041
AC145199.4	2.94265	2.71584	3.88235	3.14723	4.98618	3.93577	3.19731	2.89767	3.16429	3.19831	3.20852	2.86396	3.91892	3.69665	3.89565	2.44165	3.95847	2.73298
AC147266.3	0.721087	1.48102	0.805175	0.923087	0.643026	1.08044	0.38877	1.14455	0.882157	0.283374	1.69937	1.16785	2.03417	2.32642	2.09433	1.9319	0.758939	2.28001
AC147806.3	-3.0727	-3.18301	-2.59805	-3.65041	-3.65041	-3.65041	-3.65041	-2.59044	-3.65041	-3.65041	-3.65041	-3.65041	0.313304	-1.54207	1.44202	1.34407	0.0564063	1.45114
AC147806.7	-3.65041	-3.65041	-3.65041	-3.65041	-3.65041	-3.65041	-3.65041	-3.65041	-3.65041	-3.65041	-3.65041	-3.65041	0.299316	-3.65041	-3.65041	-3.65041	1.23386	1.51007
AC147806.8	-3.65041	-3.65041	-3.65041	-3.65041	-3.65041	-3.65041	-3.65041	-3.65041	-3.65041	-3.65041	-3.65041	-3.65041	0.285192	-3.65041	-3.65041	-3.65041	-3.65041	0.848407
AC148089.1	-0.831257	-0.706365	-1.2603	-0.498475	-0.498775	0.426225	-0.652423	-1.84502	-0.833396	-1.2486	-0.994155	-1.72098	0.84802	0.849257	-0.964748	-0.364678	1.3126	1.80722
AC148986.1	-2.07999	-2.54753	-3.65041	-3.65041	-3.65041	-2.08204	-3.15847	-3.65041	-3.65041	-2.63594	-3.65041	-3.65041	2.86253	3.46029	4.3977	4.43689	5.24701	3.58115
AC149086.3	-0.0266615	-0.415081	-0.0326237	-0.0739116	1.20325	0.280441	0.157203	0.195609	-0.0568161	0.546725	-0.328804	-0.178576	0.35447	1.00092	2.43538	3.29832	2.60651	3.83272
AC149603.1	1.75114	2.44342	2.10011	2.2875	2.76658	3.23472	2.74213	2.88479	3.64566	2.85299	2.29926	2.58851	1.55825	3.38007	2.71001	1.7573	-3.65041	0.00360757
AC151602.15	-0.831257	-1.47409	-0.559991	-0.957781	0.159644	-0.727254	-0.397496	0.0345695	-0.716232	-1.01749	-1.02704	-0.482379	-2.78016	-3.65041	-3.65041	-3.65041	-1.45202	-3.65041
AC151736.3	0.126318	0.386897	-0.00141202	-0.968425	-0.236424	-0.226814	-1.06597	-0.7074	0.0175706	-0.0572076	-0.363384	-0.0793386	1.33305	0.483784	1.27285	1.38161	0.88454	1.96198
AC152164.1	4.04447	3.54101	4.03052	3.80918	4.42491	4.19786	3.58932	4.00595	4.04147	3.84746	3.88156	3.83111	4.24047	5.02832	4.74463	4.71199	4.1168	4.4267
AC152164.2	-1.10783	-3.65041	-0.294872	-2.04473	0.177759	-0.294448	-2.72903	-0.864953	-1.3776	-1.72235	-3.65041	-3.65041	1.23359	-3.65041	0.998063	1.58835	2.98467	2.87212
AC152164.3	5.59056	5.41208	5.86458	5.71876	6.08842	6.04515	5.69052	5.34321	5.76676	5.47636	5.6657	5.41954	6.49619	6.85168	6.34754	7.3507	6.78512	6.99393
AC152398.1	-1.08365	-0.249158	-0.235561	-0.408765	-1.16295	-0.774762	-0.594883	-0.673872	-0.113912	-1.16738	-0.328804	-1.64017	-2.24117	-0.551092	1.39532	1.43316	0.878801	1.99575
AC152398.2	-2.6613	-1.91319	-3.03033	-2.37205	-1.77919	-1.6691	-2.25792	-2.86527	-3.65041	-3.65041	-3.0911	-2.74135	-0.179701	0.133529	-0.0814637	0.520663	-0.754529	0.00360757
AC152939.2	6.1087	5.72717	5.79039	5.78125	6.03694	6.00993	5.78159	5.79091	5.94068	5.99572	5.5952	5.63791	6.29602	6.25448	6.09758	6.15576	6.02452	6.55776
AC152939.3	-3.65041	-2.83056	-3.65041	-3.65041	-2.76927	-3.65041	-2.08951	-2.17949	-2.79513	-2.0706	-3.65041	-3.21624	7.07914	6.55636	7.8268	6.66338	7.18793	8.06783
AC152939.5	-1.49747	-1.62862	-1.99605	-0.545513	-1.33206	-0.765134	-0.674606	-1.56137	-0.765285	-0.71853	-1.70878	-1.97479	-1.94636	0.73306	-2.99783	1.67907	-0.174717	-0.161764
AC153919.1	1.31027	1.35092	1.02422	1.67547	1.30359	1.13545	1.33684	1.73349	1.29289	0.727484	1.1468	0.681335	1.15809	0.893822	1.10885	0.115465	1.32109	0.522853
AC155158.1	3.01233	3.26097	2.9376	2.70085	3.0021	3.11926	3.34613	3.40912	3.37702	3.38827	3.45169	3.55468	2.11625	1.92831	1.99891	2.36564	3.14986	2.92051
AC155163.6	-1.34595	-0.67094	-0.653935	-0.132555	-0.48446	-0.765134	-0.020798	-0.322618	-0.399914	-0.454861	-0.909957	-0.813523	-0.838592	-0.473565	-3.65041	0.940903	0.237739	1.06228
AC155316.6	-0.762454	-0.537346	-1.57257	-1.38687	-0.634431	-0.502659	-1.09559	-0.673872	-0.607872	-1.3054	-1.70878	0.0818081	0.483781	-0.719886	-1.32738	-0.52907	-0.29931	-3.65041
AC155806.4	-0.669527	-0.609288	0.303591	0.320807	-0.0562534	0.0813724	-0.170377	-0.0837322	-0.850939	-0.925568	-0.328804	-0.904989	1.07843	-3.65041	-0.306776	0.0470352	1.36281	-0.0767101
AC155937.10	0.245656	-1.21745	-0.713386	-0.619076	-1.46627	-0.38003	0.127596	-0.499279	0.199005	-3.65041	0.316132	0.174088	-3.65041	-1.03927	-3.65041	-0.171104	-1.84919	-3.65041
AC155937.2	-3.65041	-1.77138	-1.39984	-2.37205	-1.62993	-0.97107	-1.86885	-1.98603	-2.0046	-2.63594	-2.11721	-2.18802	-0.323796	-3.09152	0.961409	0.854561	1.04177	-2.04397
AC155937.7	-1.85864	-1.49872	-1.24559	-1.89508	-1.77919	-2.34341	-1.56273	-1.23369	-2.76156	-1.45804	-1.13045	-1.47687	-0.122095	-3.65041	-0.47926	-0.782197	-2.70898	0.677758
AC156028.2	0.721087	1.16543	0.971713	1.76975	1.4635	0.940358	1.28797	1.5081	1.31665	1.23538	1.13198	1.23366	2.24953	0.973496	3.50794	3.58645	3.13789	3.28431
AC156554.3	1.30799	0.913386	-0.123789	1.21884	0.868874	1.3979	1.03127	0.401503	0.658651	0.125798	0.921179	0.160617	1.66027	1.78582	2.67339	2.16681	1.44278	0.539114
AC156992.2	2.32806	2.32647	2.25806	2.16014	2.51733	2.10644	2.41191	2.23766	2.21969	2.5206	2.21505	2.39309	2.13606	2.19013	1.53793	2.51385	1.9328	3.43674
AC157555.1	3.08348	2.99372	3.46293	3.58913	3.36629	3.27786	3.07412	2.81625	2.93209	2.67172	2.75433	2.70291	3.01153	3.62356	2.39846	3.75143	3.12704	2.82095
AC157561.9	3.17841	3.02754	3.39828	3.33586	3.411	3.30724	3.29567	3.39023	3.08463	3.07855	3.19552	3.42921	3.8238	3.25127	4.34725	4.08487	4.0716	3.77725
AC157606.1	-3.65041	-3.65041	0.117091	-3.65041	-3.65041	-3.65041	0.0212101	-0.82025	0.797427	-3.65041	-0.97264	-0.654257	0.0877587	-3.65041	1.87897	-3.65041	-3.65041	-3.65041
AC157667.1	7.59029	7.6956	7.45531	7.4422	7.16865	7.47517	7.51121	7.49779	7.24465	7.37219	7.54144	7.51705	7.24697	7.30392	7.24325	7.20057	7.26317	6.9514
AC157761.1	-3.65041	-3.65041	-3.65041	-3.65041	-3.12127	-3.65041	-3.65041	-3.65041	-3.65041	-3.65041	-3.65041	-3.65041	1.56411	2.79436	4.76459	4.2801	4.56127	4.714
AC157774.6	3.47253	3.52047	3.28449	3.40604	3.46132	3.51906	3.84655	4.40331	4.11333	4.07903	3.91188	4.25218	2.78936	2.70465	2.42318	2.11017	1.95752	2.34312
AC157924.3	-3.0727	-2.83056	-3.65041	-3.08949	-2.73497	-3.07372	-2.05031	-2.59044	-2.46293	-3.65041	-3.65041	-2.43832	0.420574	-3.65041	-3.65041	-0.0412639	-3.65041	-3.65041
AC158114.3	1.98637	2.42717	2.59981	2.31079	2.54289	2.32501	2.14265	2.02953	1.99265	2.32044	2.31684	2.09089	2.58835	2.22543	2.36058	2.29364	2.06504	1.93561
AC158136.1	-3.65041	-3.65041	-3.65041	-3.65041	-3.65041	-3.65041	-3.65041	-3.65041	-3.65041	-3.65041	-3.65041	-3.65041	-3.65041	-3.65041	-1.17123	-0.217118	0.145146	1.30348
AC158304.5	-0.903508	-0.650095	-0.192626	-0.365919	-0.603163	0.417797	-0.0350771	-0.0318393	0.00299691	0.562684	0.523389	0.370202	1.13465	1.09043	2.62628	0.978132	0.446144	2.46869
AC158352.1	-0.968453	-1.17713	-0.471792	-1.1748	-1.20927	-1.13499	-1.56273	-1.32442	-2.0046	-1.62876	-0.574023	-1.20866	1.4829	0.908376	2.06793	0.867846	1.73415	1.39863
AC158786.1	-2.34156	-2.31102	-1.99605	-2.68663	-1.61426	-3.65041	-1.56273	-3.20507	-2.76156	-2.63594	-2.68906	-3.12543	-1.18672	-1.54207	-2.99783	0.115465	0.989464	1.30348
AC158898.4	-0.422034	-0.249158	-0.388676	-0.324309	-0.110178	-1.21138	0.0709459	-0.812932	-0.465958	-0.454861	-1.01599	-0.236808	0.35447	-1.0171	0.43835	-0.0412639	-1.73919	0.467287
AC158901.1	-3.65041	2.05749	-3.65041	1.9473	-3.65041	-3.65041	-3.65041	-3.65041	0.329329	3.55411	2.81898	4.01702	2.42081	-3.65041	2.38217	-3.65041	-3.65041	2.92464
AC158971.1	7.65244	7.70365	7.59294	7.74131	7.49434	7.57434	7.3687	7.21274	7.19526	7.11735	7.19979	7.25213	8.44961	8.56297	8.2168	8.60242	8.14934	8.44955
AC159126.1	-1.94315	-1.77138	-1.76882	-2.11394	-2.43057	-1.08623	-1.24249	-2.35968	-2.0046	-2.63594	-3.0911	-1.53413	-1.94636	-0.473565	-3.65041	-1.2716	0.514364	-3.65041
AC159257.5	4.32555	4.43442	4.41728	4.16528	4.52582	4.30629	4.5215	4.5637	4.52132	4.63686	4.27857	4.57856	4.49599	4.30639	4.1068	3.93356	3.86068	4.33071
AC159257.6	1.95752	1.71459	2.20552	1.76815	1.57192	1.62904	1.53188	1.97773	1.99265	1.54752	2.48177	1.54146	1.5044	1.35978	2.13978	0.762721	0.558115	1.61607
AC159266.3	4.627	4.59583	4.50738	4.66447	4.32305	4.57737	4.66402	4.84038	4.6617	4.69797	4.71233	4.654	4.58119	4.58532	4.97145	3.88212	4.34416	4.61521
AC159298.2	-1.08365	-0.357627	-2.59805	-1.12632	-1.46627	-1.49987	-1.43102	-1.56137	-0.684433	-1.82243	-2.37498	-0.496538	-0.838592	0.083104	-0.78415	0.115465	-3.65041	0.0796887
AC160526.2	-3.65041	-2.83056	-3.03033	-2.11394	-3.65041	-3.65041	-3.15847	-2.59044	-3.13859	-2.31113	-2.37498	-3.65041	-0.838592	-3.65041	0.994769	2.21785	-0.827718	0.725906
AC160535.1	5.86894	5.90481	5.46365	5.67198	5.62873	5.51535	6.09399	6.25447	6.04039	5.90445	5.92426	6.18297	5.31355	5.93357	4.894	4.97065	5.3623	4.15502
AC160535.2	-0.86178	-1.62862	-0.979208	-0.394341	-0.110178	-1.21138	-1.70769	-1.23369	-2.0046	-1.82243	-0.909957	-2.18802	-0.838592	-1.13154	1.74815	-0.0412639	-0.435689	-3.65041
AC161108.3	1.35077	1.33184	1.33908	0.780982	0.852052	1.49123	1.89154	1.83013	1.82049	1.66675	1.84429	1.73718	2.1002	1.59928	1.40776	1.79256	1.1362	1.59029
AC161119.1	-3.65041	-3.65041	-3.03033	-3.65041	-3.65041	-3.65041	-3.65041	-3.65041	-3.65041	-2.63594	-3.65041	-3.12543	3.72327	3.94627	6.14515	5.8388	6.01474	6.16466
AC161169.3	-2.34156	-2.54753	-2.59805	-2.37205	-2.73497	-2.66284	-3.15847	-2.16079	-3.65041	-3.65041	-3.65041	-3.65041	4.9062	4.76199	6.10571	6.21858	6.26626	7.04018
AC161207.1	4.15118	4.10975	3.90724	4.46877	4.38039	4.1481	4.22389	4.15542	4.11333	3.92126	4.10763	4.24448	4.07587	4.36561	3.38123	3.55257	3.931	4.01332
AC161218.5	-2.34156	-2.54753	-3.65041	-3.08949	-1.98545	-2.37235	-1.44367	-1.98603	-1.2675	-2.04619	-2.95831	-1.80659	0.135777	-0.719886	2.45947	1.67151	1.59756	1.64139
AC161342.2	-0.21741	-0.00906394	-1.76882	-2.79613	-1.83258	-0.864431	-1.44367	-0.132998	-0.0568161	-1.31996	-0.268576	-0.297489	0.483781	-0.551092	-3.65041	-1.2716	-1.21264	-3.65041
AC161348.3	2.1316	2.4099	2.32976	2.43715	2.05853	2.45323	2.30166	1.94357	2.1846	2.37568	1.40075	1.97124	1.93815	1.44211	2.99934	2.5555	2.08512	1.33486
AC161441.7	-3.65041	-3.65041	-3.65041	-3.65041	-3.65041	-3.65041	-3.65041	-3.65041	-3.65041	-3.65041	-3.65041	-3.65041	5.03865	5.47462	6.8211	6.91775	6.26213	7.30292
AC161510.1	-1.66678	-3.18301	-3.65041	-3.65041	-2.17934	-3.07372	-3.65041	-3.20507	-3.65041	-3.65041	-2.37498	-3.65041	-1.00218	0.083104	1.64687	-0.313796	1.55501	-3.65041
AC161792.1	3.90564	3.80404	3.83515	4.21287	4.04326	3.71236	3.86525	3.80004	3.88369	4.04713	3.84908	3.82401	3.78731	3.7	3.74695	3.43922	3.14986	2.68507
AC162370.2	-1.49747	-1.94669	-1.2603	-0.0796699	-1.24503	-1.22451	-1.20973	-0.380938	-0.615348	-0.936742	-0.920217	-0.670217	0.909163	-0.719886	2.13978	1.99178	1.48117	3.33951
AC162442.2	-0.772084	-1.66999	-1.36764	-1.81605	-0.902896	-1.48399	-2.69841	-2.14233	-2.46293	-3.00786	-2.37498	-3.12543	0.774091	-0.237368	1.32099	1.20793	1.96024	-0.18829
AC162528.2	7.97397	8.17384	7.7495	7.46901	7.06536	7.85294	7.94875	8.14432	7.94467	8.08267	8.15097	8.13681	7.74737	8.23917	7.83876	8.03721	7.64073	7.68618
AC162689.1	3.04698	3.28597	3.13801	3.48277	2.99765	2.8461	2.94731	2.89153	2.78509	3.0695	3.09658	2.919	3.18415	2.57564	3.89123	3.55668	3.44221	3.04624
AC162893.3	0.360286	0.776381	0.675988	1.53934	0.281917	0.352965	0.475265	-0.256603	-0.0117255	0.224401	0.607928	0.945006	-0.571145	0.187034	-3.65041	0.612972	-0.944972	-2.04397
AC163013.1	-2.05626	-3.18301	-3.03033	-3.65041	-3.65041	-3.65041	-3.65041	-3.65041	-3.65041	-3.05578	-3.65041	-3.65041	-0.323796	-3.65041	-3.65041	0.628666	-3.65041	-3.65041
AC163329.3	3.1417	2.87411	3.48569	3.58549	3.17043	2.90307	3.46165	3.64294	3.27962	3.26689	3.61158	3.46207	2.73844	1.98571	3.00917	1.70398	3.76202	2.34312
AC163434.5	-2.34156	-1.37955	-2.26587	-1.53722	-1.46627	-0.97107	-2.05031	-1.83017	-2.76156	-1.16738	-1.39083	-3.65041	-3.65041	-3.65041	-1.93324	0.44586	0.145146	-3.65041
AC163438.1	-3.65041	-3.65041	-1.85547	-0.619076	-1.85083	-0.174901	-1.24249	-0.96684	-0.684433	0.109594	-3.65041	-1.39502	-0.885751	-0.458548	-3.65041	-3.65041	-0.450063	-1.03865
AC163442.1	3.06939	3.12599	3.66126	3.21406	4.17592	3.43854	3.1917	2.9416	3.0684	3.10672	3.11177	3.03367	3.62155	3.51838	3.76156	2.90608	3.38059	3.85887
AC163616.2	5.21072	5.42072	5.13751	5.20282	5.23678	5.35368	5.36167	5.44553	5.45344	5.38816	5.56701	5.41754	5.38235	5.32954	5.27332	5.1431	5.23807	5.55223
AC163668.5	-0.696782	-0.0769922	-0.364647	-0.483131	-0.634431	-0.51068	-0.343187	0.962516	-1.04929	-0.0880218	0.173864	0.0431773	-3.65041	-0.428973	-0.364828	-2.8265	-0.352324	-1.02265
AC163703.7	-0.86178	-1.77138	-0.754426	-2.37205	-1.09613	-1.34842	-0.999124	-0.741727	-2.46293	-0.625183	-0.328804	-1.62454	-2.84082	-1.13154	0.28499	-3.65041	-3.65041	-3.65041
AC163993.2	-1.66678	-1.62862	-1.39984	-1.0118	-1.33206	-1.34842	-1.56273	-1.56137	-2.46293	-1.04141	-0.631865	-2.18802	4.49177	4.77595	6.41062	6.40858	6.14448	6.9455
AC164004.2	-3.65041	-3.65041	-3.65041	-3.65041	-3.65041	-2.34341	-3.65041	-3.65041	-3.65041	-3.65041	-2.68906	-3.65041	-3.65041	-3.65041	-0.152728	-0.417421	-3.65041	-3.65041
AC164004.4	-1.33164	-3.65041	-3.65041	-3.65041	-3.65041	-3.65041	-0.020798	-3.65041	-3.65041	-3.65041	-3.65041	-3.65041	-3.65041	-3.65041	-3.65041	-3.65041	1.052	-3.65041
AC164158.1	3.53195	1.97267	4.70316	3.20994	4.783	3.39841	3.88876	4.12193	4.49921	5.68029	3.91873	4.51932	5.09541	5.43194	6.02959	5.6588	5.57999	6.00773
AC164640.1	1.80395	2.16921	1.59942	2.24321	1.63883	1.75147	1.61196	1.04739	0.742923	0.46417	1.36106	1.35691	2.03417	2.81768	3.69208	2.90608	2.57135	3.93355
AC164703.3	2.70216	3.01672	2.9042	3.08361	2.64326	2.9233	2.82615	2.45556	2.63329	2.76434	2.71427	2.64685	3.41248	2.24046	2.76905	2.62235	1.75936	2.89967
AC165086.3	5.59431	5.66312	5.44224	5.54886	5.6681	5.60682	5.38107	5.28259	5.17063	5.34829	5.35672	5.25907	6.22889	6.1389	5.77693	5.85932	5.70283	5.86761
AC166063.4	-1.34595	-0.67094	-0.653935	-1.53722	-0.893409	-1.21138	-3.15847	-2.35968	-1.65731	-1.82243	-1.89859	-1.78906	-0.436313	-2.37576	-0.573907	0.256823	-2.70898	-1.30274
AC166328.1	3.70202	3.65707	3.61669	3.9237	3.15965	3.55889	2.95997	2.79964	2.77869	3.36741	3.08573	3.28198	4.68098	4.82855	6.04719	6.0961	6.13563	6.08105
AC166332.1	3.68804	3.72047	3.60963	3.32881	3.15965	3.43123	3.82628	3.68651	3.52971	3.53199	3.65671	3.42593	1.76321	2.93676	3.63821	3.55462	3.3077	3.80945
AC166710.3	-1.08365	-0.602597	0.35273	-0.714399	0.0459017	0.184337	-0.154701	0.121161	-0.0568161	-0.925568	0.632704	-0.122604	-1.00218	-2.37576	-0.0135543	-2.38716	-3.65041	-2.04397
AC167036.3	-1.54621	-3.65041	-1.55433	-2.68663	-3.03529	-2.62752	-2.01215	-2.38116	-1.83791	-2.09543	-2.68906	-2.64357	0.585259	1.1891	2.34772	1.40001	1.27377	0.286466
AC167036.6	-3.65041	-3.65041	-3.65041	-3.65041	-2.73497	-2.66284	-3.65041	-3.65041	-3.65041	-3.65041	-3.65041	-3.65041	-3.65041	1.00092	-3.65041	-3.65041	-3.65041	-0.135717
AC167117.2	-2.34156	-1.77138	-2.26587	-2.11394	-1.96544	-2.08204	-2.25792	-3.20507	-2.76156	-2.04619	-3.0911	-1.47687	0.135777	-0.633022	2.20394	1.53938	2.01359	1.16714
AC167245.5	-0.146803	0.196717	-0.471792	-1.38687	-0.557497	-0.149629	0.38877	-0.375537	0.220161	0.283374	-0.137113	0.693859	-0.691679	-0.473565	0.389019	-0.782197	-0.944972	-3.65041
AC167815.1	6.50354	6.5833	6.36758	6.53726	6.22017	6.41846	6.39652	6.28682	6.33161	6.37638	6.3929	6.31975	6.51835	6.59297	6.15117	6.52305	6.4439	6.48984
AC168051.1	-2.34156	-0.415081	-0.559991	-1.70508	-0.99121	-1.34842	-0.743278	-0.673872	-1.0392	-0.302541	-0.398812	-0.297489	-0.323796	0.27502	-0.675202	-2.88472	-2.70898	-0.348576
AC170806.5	-2.6613	-2.54753	-3.03033	-2.11394	-2.73497	-2.66284	-3.15847	-3.20507	-3.65041	-2.31113	-3.65041	-2.43832	-0.691679	1.33844	2.34772	3.40089	3.29698	2.75635
AC170806.6	-0.582226	-1.77138	-1.39984	-0.401535	-1.35792	-2.08204	-0.782891	-0.784027	-0.951431	-1.62876	-1.55698	-0.236808	-3.65041	-0.399993	-0.0135543	-3.65041	-2.70898	-3.65041
AC171273.3	-1.66678	-0.415081	-1.60974	-0.351915	-0.414942	-0.864431	-1.03694	-0.96684	-0.00680129	-0.71853	-1.52531	-0.646342	-0.691679	-1.70975	-3.65041	-3.65041	-1.73919	-3.65041
AC171680.3	-3.65041	-3.65041	-3.65041	-3.65041	-3.65041	-3.65041	-3.65041	-3.65041	-3.65041	-3.65041	-3.65041	-3.65041	-0.0309192	-3.65041	-3.65041	-0.217118	-3.65041	-1.75252
AC171684.1	0.236079	0.536836	0.35273	0.450324	0.0943888	-0.21366	0.588258	0.709109	0.0883091	0.330741	0.363421	0.174088	5.23283	5.45369	6.84038	6.36132	6.60944	7.16822
AC175113.2	-1.03646	-2.03401	-3.65041	-3.65041	-1.39761	-2.40189	-3.65041	-3.65041	-1.44261	-0.39199	-2.37498	-2.01499	-2.08625	-3.65041	-0.356391	-1.12404	-3.65041	-0.0933245
Acaa1a	4.11213	4.2575	4.06962	4.20164	4.13275	3.93245	4.30595	4.2506	4.46639	4.4599	4.33789	4.3666	3.72458	3.68824	3.63186	3.04609	3.75655	2.45733
Acaa1b	2.37354	2.45229	3.06027	2.79196	2.52708	2.61312	2.82286	2.896	3.22101	3.09373	2.69002	2.51278	1.55531	0.765399	1.25093	-0.0166414	-0.651268	2.21908
Acaa2	4.00025	4.02858	4.02181	4.25666	3.85558	4.04242	3.67405	3.66276	3.54572	3.71806	3.58915	3.51597	2.88612	3.4404	2.91646	2.69868	2.62377	2.96131
Acaca	7.88596	7.89403	7.93209	7.94816	7.89012	7.87051	7.71648	7.63943	7.70838	7.74931	7.63859	7.63146	7.8512	8.13174	7.65613	7.88579	7.87508	7.63875
Acacb	4.65219	4.47254	4.46052	4.23363	3.9837	4.43845	4.03746	4.03893	3.92325	3.93665	3.83771	3.67405	4.65169	4.61889	3.89123	4.98875	4.06277	3.61925
Acad10	3.09941	2.82966	3.02128	3.14044	3.05329	3.0764	2.96356	2.4781	2.43584	2.57669	2.60851	3.14731	3.26914	3.57238	3.42777	2.50679	2.676	2.84731
Acad11	4.84525	4.6335	4.72595	4.74811	4.84701	4.80245	4.4363	4.44091	4.30125	4.62551	4.50056	4.45455	4.61687	5.07099	4.82357	5.04076	4.63121	4.2784
Acad12	3.285	3.27102	3.25248	3.54162	3.47558	2.97951	3.2775	3.22765	3.03357	3.36058	3.10546	2.87569	2.35809	3.09972	2.08352	2.70486	2.20005	2.12706
Acad8	2.161	2.37812	2.28362	2.72994	2.45464	2.43351	2.18433	2.31401	2.30037	2.44513	1.76487	2.27302	2.24771	2.79436	2.1693	3.31458	2.38147	1.76175
Acad9	4.63226	4.6296	4.73571	4.79744	4.9285	4.71185	4.8388	4.76964	4.96293	4.69593	4.72102	4.80559	4.6316	4.36376	3.80687	3.84341	3.83719	3.84313
Acadl	4.13195	4.04199	3.95972	3.92046	3.96393	4.01474	4.09049	4.04397	3.8231	4.04002	4.1202	4.03282	3.89586	3.94274	3.70221	3.51083	4.00532	4.08429
Acadm	5.32903	5.36805	5.34375	5.68466	5.12627	5.16215	5.42008	5.28696	5.38846	5.24545	5.24293	5.35028	4.89752	5.2373	4.62509	4.8024	5.01161	4.73474
Acads	4.73908	5.0425	4.74908	4.76025	3.98691	4.80447	4.78901	4.87336	4.79633	4.7444	4.70609	4.76369	4.18449	4.71723	3.58608	4.44799	3.57058	3.31532
Acadsb	3.11517	3.14649	3.47241	3.38999	3.59708	3.53814	3.59125	3.24659	3.61084	3.42202	3.27186	3.31782	3.88712	3.4454	3.38123	3.61233	2.9726	2.67284
Acadvl	5.04545	4.96017	5.00103	4.91304	5.14725	4.9633	5.07179	5.15231	5.30825	5.11827	5.0642	5.09569	4.10631	4.04507	4.1684	3.68293	4.24725	3.03003
Acan	3.37228	3.13152	3.61669	3.36424	3.83075	3.12575	3.12424	3.06091	2.84828	3.00745	2.94444	2.69514	3.0621	3.37379	2.58525	3.1967	2.86058	0.522853
Acap1	0.283338	0.342517	0.303591	-0.905709	0.800375	-0.21366	0.114719	0.158865	0.177535	-0.0390301	-0.137113	-0.0167805	0.658313	0.182251	1.12099	1.3409	1.51856	1.78467
Acap2	5.93508	5.97442	5.89206	5.70877	5.38374	5.80958	6.07237	5.95005	5.97555	5.92621	5.98643	6.00023	5.60745	5.9021	5.72818	6.2098	5.86475	5.6877
Acap3	5.26587	5.06106	5.09969	5.15136	5.19792	4.95039	4.83406	4.88761	4.57814	5.01476	4.66164	4.77516	4.63125	4.7479	4.66993	4.48797	4.55183	4.21697
Acat1	5.63837	5.53871	5.48708	5.47357	5.29304	5.48075	5.55558	5.57197	5.27704	5.55949	5.45983	5.54235	5.20474	5.57496	5.10728	5.13328	5.18732	5.36937
Acat2	4.03656	4.21718	4.20523	4.0996	4.3299	4.2092	4.6677	4.59412	4.65977	4.66854	4.56127	4.63991	3.24653	3.12049	3.10393	3.33784	1.16479	2.79071
Acat3	-1.24863	-1.14761	-2.84162	-2.0905	-1.29411	-0.736631	-3.65041	-1.31406	-2.19309	-1.31996	-3.04546	-3.65041	-3.65041	0.774961	-1.01699	0.0470352	0.849756	-3.65041
Acbd3	6.77895	6.63844	6.52183	6.5123	6.52517	6.57316	6.6776	6.67487	6.53867	6.50448	6.45121	6.56262	6.36427	6.35014	5.93888	6.13965	6.36963	6.34311
Acbd4	0.192181	-0.742682	-0.0326237	-1.53722	0.141299	0.280441	-0.337277	-0.375537	-0.399914	0.628607	-0.0221499	0.298209	-0.558353	-1.89952	0.23002	-1.08939	-1.16443	-3.65041
Acbd5	4.34434	4.34402	4.30067	4.48032	4.52028	4.50909	4.21587	4.23392	4.42211	3.94809	4.19756	4.00104	4.50249	4.39148	4.46946	4.24998	4.5009	4.39466
Acbd6	4.78249	4.68072	4.57365	4.6223	4.74743	4.65449	4.7557	4.9302	4.80055	4.85829	4.90206	4.73141	4.1208	4.32604	4.8715	4.39773	4.49669	4.8215
Acbd7	-1.08365	-1.77138	-1.39984	-0.905709	-2.17934	-1.86085	-0.823623	-0.96684	-1.0392	-0.232015	-0.71874	-1.34292	-1.39837	-3.65041	-3.65041	-3.65041	-0.29931	-0.960363
Accs	-0.582226	0.0851133	-0.178593	0.0472819	0.541759	-0.0180302	-0.0689548	-0.559237	0.658651	0.550732	0.0160165	0.0333558	-0.323796	-0.138317	0.703417	1.13654	0.125892	0.409495
Acd	4.66786	4.76381	4.83567	4.56441	4.77558	4.49713	4.98615	4.88606	4.9032	4.81084	4.80478	5.06288	4.25911	5.01829	4.25699	4.58199	4.04366	4.38719
Ace	5.6507	5.73222	5.44805	4.84248	5.14567	5.5329	5.33844	5.4939	5.07575	5.50375	5.54165	5.4428	6.18213	6.38112	7.61194	7.60209	7.45462	7.71834
Ace2	-0.348149	-0.302374	-1.39984	-0.627486	-1.20927	-0.280665	-1.31034	-0.322618	-0.399914	1.18472	1.40281	0.950236	-0.691679	-0.329992	1.02737	1.13654	-3.65041	-3.65041
Ace3	-3.65041	-3.65041	-3.65041	-3.65041	-3.65041	-3.07372	-3.65041	-3.65041	-3.65041	-3.05578	-3.65041	-3.65041	-3.65041	-3.65041	-2.55014	1.24234	1.32109	-3.65041
Acer2	1.92809	1.5029	1.83033	2.05895	1.45424	1.60882	2.03057	1.88291	2.2924	2.40031	2.12187	1.9466	1.66573	2.74007	2.85512	2.42677	1.65241	1.93561
Acer3	3.20994	3.39069	3.55189	3.42141	3.97142	3.48668	3.3295	3.54987	3.73692	3.53553	3.65498	3.64371	3.98758	3.14405	4.49504	4.43056	3.97336	3.09747
Acin1	8.78575	8.70274	8.57462	8.59484	8.5418	8.55086	8.72852	8.88035	8.87531	8.84282	8.72173	8.79715	8.30901	8.6145	8.10908	8.22432	8.09755	8.04995
Ackr3	-0.968453	-0.982171	-0.862444	-1.0118	0.50636	0.133773	-0.823623	-1.44368	-2.46293	-0.164777	-0.71874	-1.22036	-3.65041	-3.65041	-3.65041	-1.4802	-3.65041	-3.65041
Acly	8.31355	8.23873	8.24993	8.28292	8.15289	8.17599	8.4964	8.44869	8.37515	8.5759	8.48465	8.44718	7.67465	8.08072	7.56068	7.56178	7.54968	7.30277
Aco1	4.89953	4.85321	4.75594	4.83484	4.30514	4.7614	4.68232	4.60287	4.44969	4.56291	4.58437	4.7148	4.78314	5.22282	4.64886	4.7012	4.63972	4.13866
Aco2	6.99874	7.04658	6.93133	6.95531	7.02309	6.86767	7.17548	7.25037	7.31894	7.3181	7.19716	7.36003	6.74084	7.10407	6.83975	6.46048	6.62345	6.26277
Acot1	1.37715	1.39003	1.70159	1.24211	1.15835	1.30499	1.802	1.84524	1.50253	1.77002	1.86087	1.68951	1.14642	0.370617	0.947846	-0.135322	0.808085	1.09931
Acot11	2.93528	2.98875	2.72732	2.70169	2.52177	2.35843	2.62669	2.55223	2.10836	2.74349	2.59416	2.39309	2.40946	2.38171	3.00098	2.62365	2.31926	2.77935
Acot13	4.86694	4.80842	4.43508	4.76427	4.01521	4.51946	4.88551	5.07541	4.7111	4.79826	4.94031	4.77497	4.78628	5.42487	4.77183	4.08534	4.6774	3.88136
Acot2	0.454138	0.459024	0.612844	-0.102936	1.11904	1.11734	1.12415	0.132576	1.06866	0.0257271	0.575435	-0.373846	1.82065	0.917039	1.28907	1.67907	0.506941	0.0268561
Acot3	-2.07999	-0.947848	-1.13307	-2.21172	-1.45227	-1.70546	-1.09559	-1.83017	-0.773625	-1.90781	-1.78173	-2.03552	0.212418	-3.65041	0.0321492	-3.65041	-3.65041	-3.65041
Acot4	-0.696782	-1.15739	-2.26587	-2.02237	-0.749533	-1.42216	-0.88265	-0.7074	-0.630417	-1.99857	-0.920217	-1.49097	-0.77802	0.00399943	-2.1789	-1.64653	-0.0934915	-3.65041
Acot5	-2.6613	-2.31102	-3.65041	-2.26321	-2.70148	-1.40711	-2.50051	-2.35968	-3.13859	-2.63594	-1.57308	-1.95511	-1.18672	-3.65041	0.00621049	-0.217118	-0.586318	1.30348
Acot6	-1.31747	-1.49872	0.273284	0.640948	0.273519	0.0158707	-0.891284	-1.12096	-0.798939	-1.04141	-0.487569	-0.0425175	-3.65041	-0.329992	-0.434167	0.894055	-3.01604	-1.83394
Acot7	5.36242	5.32505	5.28989	5.34124	5.4929	5.30209	5.57128	5.61838	5.43693	5.35131	5.27981	5.37017	5.50263	5.33763	6.50777	6.37593	6.24131	6.77934
Acot8	2.40486	2.1195	2.34562	2.20819	2.55246	2.61035	2.21482	2.27161	2.36068	2.17229	2.79645	2.45785	2.05513	2.44097	1.26467	2.66102	2.50024	-3.65041
Acot9	5.08266	5.0834	5.12995	5.07584	4.88799	5.04749	5.30706	5.29449	5.08284	5.16785	5.09493	5.42988	5.19556	5.1044	4.99637	4.86171	4.94794	3.94377
Acox1	4.66296	4.78294	4.81871	4.76427	5.05838	4.55352	4.60002	4.5346	4.55335	4.4254	4.68298	4.64395	4.56667	4.81722	4.08992	4.41065	4.71009	4.43866
Acox2	-3.65041	-3.65041	-3.65041	-3.65041	-3.12127	-3.65041	-2.50051	-2.86527	-3.65041	-3.65041	-3.65041	-3.65041	-3.65041	-2.6897	0.389019	-3.65041	-3.65041	0.627949
Acox3	3.08548	3.31055	3.40471	3.52417	3.22154	3.35051	2.72175	2.54085	2.62855	2.93267	2.88234	2.87087	3.62576	3.68021	3.97761	4.2863	3.44318	3.08552
Acp1	4.24369	4.38668	4.29439	4.25951	4.60827	4.11264	4.48381	4.73199	4.6868	4.37263	4.4955	4.61749	3.70283	3.667	3.44899	4.06626	3.96526	4.24161
Acp2	2.66606	2.82842	2.93518	2.89317	3.06975	2.81354	2.84772	2.76154	2.58681	3.27175	2.93594	2.79806	2.00861	2.9565	2.88211	2.99049	3.58034	3.81614
Acp5	2.10948	2.17019	1.94212	1.92158	2.04995	2.06521	2.28355	2.56703	2.38711	2.30865	2.46314	2.38345	0.212418	0.797029	1.68824	1.49154	1.69223	-0.451914
Acp6	4.42583	4.35459	4.44955	4.50601	4.41278	4.67365	4.51007	4.47456	4.4655	4.78195	4.61998	4.6802	4.23726	4.75133	4.31757	4.25251	4.03594	3.01945
Acpp	1.55713	1.57254	1.28188	1.7209	0.706792	1.47711	1.79798	1.53559	1.61542	1.04969	1.50219	1.4129	1.56411	1.88629	1.78676	1.57491	1.18818	1.06228
Acr	-1.34595	-0.818179	-1.39984	-0.0175587	0.141299	0.0269963	-2.50051	-1.44368	-1.14342	-1.82243	-3.0911	-1.34292	0.135777	1.10567	2.09433	1.17267	2.77046	2.37366
Acrbp	3.50828	3.14401	3.13941	2.95362	2.70624	3.34552	3.36845	3.3606	3.46649	3.35028	3.56957	3.6287	4.04582	3.92137	4.8652	4.90397	4.20085	3.78352
Acrv1	-3.65041	-3.65041	-3.65041	-3.65041	-3.65041	-3.65041	-3.65041	-3.65041	-3.65041	-3.65041	-3.65041	-3.65041	-1.18672	-1.54207	1.60427	1.37231	2.98601	2.21403
Acsbg1	2.63178	3.20487	3.13099	1.52613	3.67646	4.00774	1.32571	1.55127	1.94261	3.42256	2.84193	2.64765	-0.323796	-0.473565	1.26467	-3.65041	-3.65041	0.00360757
Acsbg2	-3.65041	-2.83056	-3.65041	-3.65041	-3.65041	-3.65041	-3.65041	-2.86527	-3.65041	-3.65041	-3.65041	-2.18802	6.54183	6.04561	7.22527	7.03722	6.88915	7.73876
Acsf2	4.8615	5.18405	4.83134	5.02442	4.60053	4.9449	4.70093	4.89726	4.75071	5.07511	4.94668	5.01284	4.82126	4.94413	4.11251	4.25082	4.28028	4.01816
Acsf3	2.43656	3.06479	2.94963	3.31022	2.90418	2.86483	2.80894	2.90324	2.64975	2.84485	2.99991	2.59854	3.05171	3.33122	2.95934	2.47097	3.05125	3.45113
Acsl1	5.13335	5.05631	5.21894	5.19241	5.29486	5.01991	4.91242	4.86212	4.95223	4.86434	4.94226	4.86442	8.93671	8.45176	9.44582	8.53227	8.97901	9.69094
Acsl3	6.4694	6.62945	6.58257	6.62827	6.60505	6.5487	6.82347	6.81471	6.88479	6.78897	6.74438	6.85851	6.42873	6.17546	5.97213	6.42525	6.13428	6.22244
Acsl4	3.46794	3.80467	3.76926	3.37533	3.79452	3.67792	3.6886	3.34474	3.46428	3.61708	3.48171	3.65055	3.69015	3.1286	3.20716	4.10884	3.08902	3.71241
Acsl5	-1.34595	-0.307805	0.25272	-0.0175587	-0.557497	0.0813724	-0.302317	-0.609065	-0.535171	0.234399	-0.549926	0.813458	1.377	0.951178	3.64085	3.14307	3.44997	2.48976
Acsl6	0.136648	-0.197836	0.616873	-1.70508	1.70121	1.05077	-2.7923	-2.35968	-2.76156	-1.16738	-2.68906	-2.43832	-0.219423	-0.473565	3.04145	1.13654	1.72459	0.772498
Acsm3	-1.85864	-1.92984	-1.10626	-1.89508	-1.61426	-2.34341	-1.70769	-1.56137	-1.51069	-1.82243	-3.0911	-0.813523	0.212418	-1.25584	-1.5025	-2.88472	-2.14408	2.01526
Acss1	4.3782	4.48673	4.25034	3.66081	3.59918	4.0231	4.18129	4.11882	3.92293	4.29086	4.29391	4.4379	3.42702	3.76302	3.75768	4.40459	4.19682	2.63678
Acss2	5.23315	5.2004	5.20897	5.16771	5.38666	5.39465	5.13307	5.06663	5.10959	5.16948	5.08294	5.19897	5.38525	5.129	5.49541	5.53275	5.04722	5.06695
Acss3	-0.444958	0.145972	0.29356	0.0734617	-0.893409	0.266427	-0.409847	-0.609065	-0.229618	0.416667	0.0791834	-0.569496	0.182248	-3.65041	0.500057	0.0392277	-1.16443	-1.30274
Acta2	1.82006	1.49669	2.07982	1.34456	2.56111	2.54413	1.4675	1.12564	0.261563	3.23612	2.95149	2.56485	-3.65041	-2.6897	-0.0135543	-3.65041	-3.65041	-3.65041
Actb	9.57564	9.55778	9.59766	9.42547	9.43705	9.55613	9.90603	10.0322	9.95322	9.87888	9.88745	9.97855	9.10796	9.10449	9.06577	9.27315	9.37663	9.08435
Actg1	8.58467	8.55453	8.67211	8.70649	8.72384	8.64137	8.7758	8.83045	8.84246	8.5985	8.72484	8.70236	7.92447	7.87784	7.94312	7.65992	7.94012	7.85684
Actg2	-1.34595	-2.10788	-0.979208	-2.11394	-1.09613	-0.97107	-1.70769	-2.35968	-1.14342	-0.818338	-1.01599	-0.360836	4.48406	5.09664	6.77648	6.622	6.46009	6.85104
Actl10	-1.08365	-1.16722	-1.10626	-0.905709	-0.224479	-2.08204	-0.743278	-0.96684	-0.465958	-0.376691	-1.54106	-1.1074	-0.0309192	-1.89952	-0.78415	-1.4802	-1.16443	-3.65041
Actl11	-3.65041	-3.65041	-3.65041	-3.65041	-3.65041	-3.65041	-3.65041	-3.65041	-3.65041	-3.65041	-3.65041	-3.65041	5.92607	6.23794	7.76028	7.74431	7.21516	7.86432
Actl6a	5.59091	5.49736	5.56864	5.38619	5.74235	5.52421	5.91253	5.95019	6.03189	5.80135	5.83262	5.93331	5.4062	4.95135	5.11678	4.93165	5.23302	4.97257
Actl6b	-1.64893	-1.37955	-0.862444	-1.89508	-2.43057	-1.86085	-3.15847	-1.83017	-2.46293	-1.16738	-2.68906	-3.12543	-0.323796	-3.65041	-3.65041	-3.65041	-0.29931	-3.65041
Actl7a	-3.65041	-3.65041	-3.03033	-3.65041	-3.65041	-3.07372	-2.7923	-3.65041	-3.13859	-3.65041	-3.65041	-3.65041	3.81829	3.57876	5.42281	5.61252	5.34393	5.65854
Actl7b	-1.49747	-2.83056	-0.979208	-1.12632	-0.634431	-0.424803	-2.05031	-1.13915	-2.0046	-2.04619	-3.65041	-1.78906	3.35193	1.84149	4.66449	4.3088	4.94107	2.64807
Actl9	-2.6613	-3.65041	-3.03033	-3.65041	-2.17934	-3.07372	-3.65041	-3.65041	-3.65041	-3.65041	-3.65041	-3.65041	4.8596	4.75194	6.57342	6.43104	6.07402	7.08125
Actn1	5.17451	5.02641	5.13171	5.22926	4.67356	4.74444	5.67461	5.98976	5.92555	5.72364	5.79097	5.68934	3.39367	3.30396	3.79035	3.11549	3.30663	1.09931
Actn2	5.4192	5.2471	5.04766	5.19241	4.96335	5.21494	4.91814	4.81108	4.57157	4.55296	4.35368	4.62732	5.9089	6.13558	6.13845	5.75637	5.79371	6.40994
Actn3	3.58525	3.5395	3.45733	3.1656	3.28506	3.26146	3.16124	2.95773	3.0684	3.11283	2.84193	2.4216	3.33489	3.55121	2.60699	3.06831	2.77046	2.64807
Actn4	6.98902	6.99686	6.77376	6.71969	6.63163	6.91522	7.07941	7.12379	7.05733	7.14982	7.1128	7.05648	6.2754	6.41202	6.12749	6.40004	6.20737	6.02863
Actr10	4.15182	4.24827	4.36345	4.3326	4.66796	4.23462	4.54888	4.543	4.41158	4.55546	4.38266	4.54157	4.33348	4.2973	4.94396	5.04491	5.09349	4.6311
Actr1a	4.52255	4.572	4.62206	4.48837	4.87087	4.63076	4.7739	4.9056	4.8851	4.64039	4.71854	4.76016	4.49561	4.25323	4.91593	4.48438	5.00833	5.09013
Actr1b	5.38562	5.32066	5.31474	5.26789	5.26167	5.32734	5.41713	5.55536	5.51294	5.60101	5.52047	5.61721	4.80805	5.04488	4.97354	4.98113	4.77719	4.28645
Actr2	5.10206	5.08093	5.19859	5.18927	5.21295	5.22509	5.28148	5.20271	5.31096	5.13053	5.24752	5.09289	5.05955	4.96045	4.77902	5.09801	4.96835	5.23296
Actr3	7.12539	7.14208	7.13453	7.10801	7.26241	7.12307	7.56044	7.62803	7.54592	7.42006	7.37439	7.5076	7.04568	7.07896	6.58708	7.06386	7.02372	7.17306
Actr3b	3.36681	2.79777	3.01367	3.37848	3.28506	3.04801	2.92351	3.00818	3.04487	3.05053	2.97244	3.03121	2.92079	2.8482	0.927259	3.19933	3.14986	2.87853
Actr5	4.0455	4.20579	4.41468	4.20431	4.49567	4.09754	3.90848	4.05801	4.14022	4.13614	3.99544	3.98298	3.58958	4.05459	3.38123	3.47511	3.3704	3.62624
Actr6	4.30509	4.13249	4.22681	4.43409	4.4704	4.34431	4.22638	4.23899	4.15238	4.24863	4.217	4.20127	4.18924	4.86445	4.00201	3.89839	4.47355	4.43866
Actr8	4.39389	4.30007	4.28144	4.51177	4.16375	4.38703	4.35468	4.40527	4.23238	4.40064	4.18026	4.27241	4.11133	4.73775	4.41597	4.35277	4.2781	4.14797
Actrt1	-3.65041	-3.65041	-3.65041	-3.65041	-3.65041	-3.65041	-3.65041	-3.65041	-3.65041	-3.65041	-3.65041	-3.65041	0.658313	0.797029	3.34288	3.72064	2.38147	2.68507
Actrt2	-2.6613	-3.18301	-3.03033	-3.65041	-3.65041	-3.65041	-3.15847	-2.35968	-3.13859	-3.65041	-3.65041	-3.65041	4.56301	5.13272	7.04234	6.96816	6.77501	7.33369
Actrt3	-3.65041	-3.18301	-3.65041	-1.89508	-3.65041	-3.65041	-3.65041	-3.20507	-3.65041	-3.65041	-3.65041	-3.65041	-1.00218	-2.37576	1.64687	2.93792	2.03954	-0.683854
Acvr1	2.7874	2.52359	2.46328	2.90488	2.44532	2.58234	2.83469	2.9416	2.73527	2.87792	2.45225	2.59771	1.27349	1.84149	0.662485	-0.650089	1.75623	-0.451914
Acvr1b	4.68534	4.76381	4.57365	4.64059	4.34826	4.66232	4.23136	4.29319	4.34525	4.35555	4.3241	4.42199	4.72547	4.95486	4.64624	5.11715	4.464	4.67468
Acvr1c	-2.6613	-3.18301	-3.03033	-2.68663	-1.61426	-1.86085	-1.43102	-2.35968	-1.51069	-2.63594	-1.89859	-2.43832	-0.436313	-2.6897	-3.65041	-3.65041	-3.65041	1.1354
Acvr2a	3.33352	3.38818	3.65637	3.32664	3.79818	3.43333	3.52385	3.12423	3.54152	3.07855	3.26055	3.55939	3.45015	3.27617	3.51371	3.33066	3.42064	3.08644
Acvr2b	5.1173	5.20732	5.24667	5.46135	5.34431	5.14804	5.19441	5.22953	5.45489	5.23007	5.28415	5.15067	4.95748	4.83428	4.53187	4.87821	4.50183	4.16945
Acvrl1	-0.86178	-0.67094	0.400251	-0.627486	-0.634431	-0.21366	-1.19897	-1.56137	-1.51069	1.15871	-0.0221499	0.493526	-1.94636	-1.13154	0.23002	-0.650089	-1.42338	1.23858
Acy1	3.6362	3.80718	3.64655	4.14382	3.75698	3.4897	4.10982	4.23038	4.25049	4.21115	4.13018	4.1621	3.13282	3.38892	3.20716	2.08953	2.29791	0.861398
Acy3	3.21055	3.56943	3.05136	3.00485	2.48132	3.03222	3.46588	3.67257	3.36757	3.6166	3.8641	3.76995	2.72542	2.21843	2.95934	2.94838	2.46044	2.2474
Acyp1	1.13586	0.157842	1.42889	1.3659	1.76401	1.45256	0.38877	0.830896	0.588801	0.934829	1.13198	0.869735	0.544335	1.38081	1.9316	2.4997	1.59055	-0.683854
Acyp2	-1.49747	-2.10788	-1.10626	-1.89508	-0.715699	-1.08623	-1.86885	-1.33487	-1.82053	-1.04141	-2.11721	-0.496538	-3.65041	-0.138317	-0.306776	-0.126513	-3.65041	-3.65041
Ada	0.85224	0.376776	0.732776	-0.0175587	-0.557497	-0.280665	0.678529	-1.13915	-0.00680129	-0.164777	-0.198223	-0.727512	0.135777	-0.473565	-0.573907	-0.927632	-1.16443	0.467287
Adad1	3.65877	4.02048	3.92765	4.46631	4.10373	4.01124	4.09022	3.98222	4.10483	3.92898	3.93661	4.03282	4.24959	3.74651	4.47361	4.65086	4.80432	4.63425
Adad2	4.33903	4.35502	4.42075	4.8595	4.33066	4.33874	4.47124	4.55241	4.26099	4.23313	4.4008	4.58003	4.19869	3.61026	3.73219	4.5917	3.99872	3.72431
Adal	4.44648	4.57532	4.38546	4.57131	4.26836	4.46631	4.70845	4.67604	4.66672	4.62598	4.80068	4.82742	4.10983	4.30309	4.36235	4.65597	4.45872	3.77611
Adam10	5.1319	5.24269	5.42238	5.21007	5.66027	5.48327	5.3258	5.19365	5.45823	5.22381	5.32259	5.35411	5.39781	4.91036	4.66993	4.90262	5.45899	5.29751
Adam11	1.02901	1.27848	1.33175	1.13928	2.04872	0.573873	1.4675	0.987877	1.37252	1.44362	1.71602	1.45213	1.70074	1.05424	-2.20897	-0.417421	-0.174717	1.78467
Adam12	1.39447	1.64461	1.51775	1.46811	1.32813	2.19295	1.65558	2.04974	1.04277	3.17254	2.69843	2.56485	2.13606	1.24979	1.62573	0.503742	0.145146	1.09931
Adam15	5.11926	5.27223	4.9034	5.02308	5.13063	4.97484	4.86499	4.93442	4.99028	4.9745	5.1183	5.05547	5.16696	4.71516	4.33396	4.29247	5.03114	3.77668
Adam17	5.77152	5.80534	5.73216	5.62064	5.84687	5.78777	5.96122	6.09859	6.081	5.99297	5.97307	6.0488	5.58942	5.33871	5.15952	5.7513	5.78836	6.03927
Adam18	-3.65041	-3.65041	-3.03033	-3.65041	-2.43057	-2.34341	-2.7923	-3.65041	-3.13859	-3.65041	-3.65041	-3.65041	-1.39837	-0.812318	1.42009	1.845	2.55345	0.725906
Adam19	3.09611	3.18567	2.85132	2.67372	2.49854	2.61772	2.62744	2.97527	2.58925	3.02268	3.01816	3.06172	2.22013	1.1891	2.30315	1.13288	-0.0273339	-1.51017
Adam1a	2.6336	1.80291	0.303591	-0.460416	1.25962	0.937413	0.210625	0.564894	2.03505	2.86108	2.90431	2.16585	3.67669	4.08981	5.49511	5.53414	5.13441	5.61909
Adam1b	-1.94315	-3.14363	-2.04613	-0.619076	-0.893409	-2.93773	-3.65041	-3.65041	-2.30953	-2.96147	-3.65041	-3.65041	1.40012	1.38498	2.87317	1.70398	3.31728	2.91117
Adam2	-1.66678	-1.77138	-0.235561	1.20943	1.28908	0.37054	-3.15847	-3.65041	-3.65041	-3.05578	-3.65041	-2.43832	1.80589	1.35978	3.32987	3.57299	3.85265	2.10901
Adam20	-3.65041	-3.65041	-3.65041	-3.65041	-3.65041	-3.65041	-3.65041	-3.65041	-3.65041	-3.65041	-3.65041	-3.65041	0.567862	-0.641477	0.184484	1.36609	2.22288	2.46302
Adam21	-3.0727	-3.18301	-1.76882	-3.65041	-2.43057	-2.34341	-3.65041	-2.59044	-3.13859	-2.31113	-3.0911	-3.12543	2.24953	2.67176	3.23534	2.67368	3.16172	3.31611
Adam22	3.56627	3.79488	3.91134	3.77609	3.99651	3.88356	3.2029	3.28162	3.16919	3.47621	3.19135	3.33741	4.08609	4.76599	3.92233	4.04107	3.61528	4.02779
Adam23	4.51515	4.79264	4.36824	4.42369	3.91111	4.51428	3.41471	3.37709	3.46428	3.46564	3.59816	3.53741	4.88908	5.13272	5.12076	5.01362	5.04434	4.56315
Adam24	-3.65041	-3.65041	-3.65041	-3.65041	-3.65041	-3.65041	-3.65041	-3.65041	-3.65041	-3.65041	-3.65041	-3.65041	0.602449	0.73306	1.74815	2.23504	2.65768	2.17986
Adam25	-3.65041	-3.65041	-3.65041	-3.65041	-3.12127	-3.65041	-3.65041	-3.65041	-3.65041	-3.65041	-3.65041	-3.65041	0.75884	-1.00614	2.08197	1.66646	1.83837	-1.62627
Adam26a	-3.65041	-3.65041	-3.65041	-3.65041	-3.65041	-3.65041	-3.65041	-3.65041	-3.65041	-3.65041	-3.65041	-3.65041	-1.7017	-1.25584	1.56483	2.40718	0.210579	0.945136
Adam26b	-3.65041	-3.65041	-3.65041	-3.65041	-3.65041	-3.65041	-3.65041	-3.65041	-3.65041	-3.65041	-3.65041	-3.65041	-0.533105	0.133529	1.55815	-1.39311	0.264396	-3.65041
Adam28	0.364687	0.734722	1.10961	0.774613	0.885502	1.0121	1.27452	1.26528	0.830818	1.25761	0.960853	0.652752	-1.39837	-0.737905	-0.152728	-2.01789	-0.84661	-2.04397
Adam29	-3.65041	-3.65041	-3.65041	-3.65041	-3.65041	-3.65041	-3.65041	-3.65041	-3.65041	-3.65041	-3.65041	-3.65041	-0.558353	-3.65041	-2.99783	0.44586	1.55501	1.06228
Adam3	-3.65041	-2.54753	-2.26587	-1.89508	-3.65041	-3.07372	-3.15847	-2.86527	-3.13859	-3.65041	-3.65041	-3.65041	4.46461	4.71929	7.12611	6.67571	6.63839	6.48714
Adam30	-0.499908	-0.982171	-0.754426	-0.806885	-0.48446	-0.502659	-1.43102	-1.44368	-0.942001	-1.45804	-1.89859	-0.813523	-1.39837	1.31678	1.74815	3.04901	2.88941	1.53731
Adam32	-0.669527	-0.897846	-0.171628	1.08626	0.355379	-0.350935	-2.7923	-2.16079	-1.3776	-1.82243	-3.0911	-2.18802	3.22819	3.48478	5.39341	4.98113	5.50861	4.93492
Adam33	0.502868	0.882721	1.09235	0.316429	-0.0145194	1.07777	0.869492	0.807347	0.0883091	0.0199587	-0.198223	0.174088	0.958949	1.89216	1.60211	-0.417421	0.820114	-0.0767101
Adam34	-3.65041	-3.65041	-3.65041	-3.65041	-3.65041	-3.65041	-3.65041	-3.65041	-3.65041	-3.65041	-3.65041	-3.65041	-1.39837	-3.65041	-1.95856	0.10802	0.237739	0.677758
Adam39	-3.65041	-3.65041	-3.65041	-3.65041	-2.73497	-3.65041	-3.65041	-3.65041	-3.65041	-3.65041	-3.65041	-3.65041	-0.597073	0.522142	1.61718	2.31319	2.20235	3.63573
Adam4	-0.237281	-0.249158	-0.506427	-1.0118	-0.266724	0.0046587	-1.64795	-0.673872	-0.195601	-0.6618	0.114793	0.128686	1.39026	0.85528	3.30016	1.88693	2.61861	3.00391
Adam5	-2.6613	-2.83056	0.446255	1.20943	1.28908	-0.21366	-2.7923	-3.65041	-3.65041	-1.82243	-2.37498	-3.65041	5.58078	5.34554	6.85522	6.81011	6.93998	7.24509
Adam6a	-3.65041	-3.65041	-3.65041	-3.65041	-3.65041	-3.65041	-3.65041	-3.65041	-3.65041	-3.65041	-3.65041	-3.65041	1.99349	0.266007	1.73044	2.40567	2.51512	2.35541
Adam6b	-3.65041	-3.18301	-3.65041	-3.08949	-3.65041	-3.07372	-3.65041	-3.20507	-3.65041	-2.63594	-3.65041	-3.65041	0.75884	-1.67462	1.55815	3.22622	2.78741	0.687517
Adam9	4.63362	4.66504	4.56586	4.4737	4.49092	4.60059	4.61152	4.79171	4.76788	4.45483	4.6378	4.7148	4.28062	4.67295	4.36586	4.51637	3.91005	4.82316
Adamts1	-0.210846	0.307425	0.695167	-1.12632	1.15835	1.1069	-0.397496	0.683467	-1.51069	1.88555	1.66546	0.630123	0.0548351	-1.13154	-3.65041	0.187874	0.758939	-3.65041
Adamts10	4.92397	5.01734	4.49813	4.3372	4.22927	4.75849	4.99276	5.28013	5.0332	4.94512	5.01002	5.19182	4.49561	4.48596	4.49154	4.78354	3.54182	4.09258
Adamts12	0.0948746	-0.48719	0.900793	-0.175072	0.0991491	1.26795	-0.727733	0.630775	-1.65731	1.84698	2.09283	0.389579	-0.0309192	-0.900893	0.645781	-3.65041	-3.65041	-3.65041
Adamts14	1.99065	1.69978	2.17306	2.47888	2.64326	1.6345	1.49923	1.50956	1.44619	1.41534	1.90947	1.32304	-0.199425	-1.3497	-0.0135543	0.0470352	0.29919	1.23858
Adamts15	-0.0266615	-0.302374	0.534085	-0.467948	0.0459017	0.772031	-0.0689548	0.231441	0.0415375	-0.100534	0.0320694	0.0333558	-0.323796	-0.633022	1.02737	0.385558	-1.16443	-0.0767101
Adamts16	-1.34595	-1.37955	-3.03033	-3.08949	-2.45828	-0.97107	-1.43102	-1.05042	-1.65731	-0.625183	0.183478	-1.1074	-1.00218	-3.65041	-3.65041	-0.417421	-3.65041	-3.65041
Adamts17	4.6838	4.56774	4.38133	4.1336	3.76936	4.52609	4.13368	3.89777	3.62677	4.1133	3.96197	4.01951	4.94518	4.32902	4.67482	5.07553	4.59448	4.32837
Adamts18	-1.85864	-0.474919	-1.99605	-1.40122	-0.224479	-0.149629	-0.594883	-1.23369	-0.0568161	-0.71853	-0.464862	-0.496538	0.81399	-0.399993	-1.32738	-0.650089	-3.65041	-3.65041
Adamts19	1.98637	2.0037	2.38158	3.0517	2.6691	2.69125	2.44658	2.356	2.15525	2.26054	2.21505	1.95962	2.30308	-0.633022	0.781954	0.385558	1.48117	1.61607
Adamts2	2.17485	1.80668	2.42932	1.63912	2.16679	2.80872	1.24922	1.32122	0.882157	2.69182	2.13308	1.94267	0.909163	1.8201	0.0513017	1.20793	0.145146	-1.12142
Adamts20	1.72056	1.24177	1.71668	1.78567	0.910091	1.25618	1.90157	1.40362	1.05695	1.26251	1.1566	1.23366	1.62145	1.02783	1.82435	1.9319	0.0462007	1.48231
Adamts3	3.4364	3.31938	2.85218	2.84687	2.51733	3.15139	2.92965	2.70085	2.37866	2.76175	2.87197	2.44031	2.73844	2.29354	2.07886	3.70839	2.75488	1.8513
Adamts4	-0.68764	-0.818179	-0.097149	0.368107	-0.557497	-0.273823	-0.526043	-0.386358	-0.535171	-0.232015	-0.328804	-0.670217	-1.00218	0.083104	0.28499	-3.65041	-0.174717	1.09931
Adamts5	1.78765	1.69978	3.41168	1.76815	2.88363	3.60323	-0.296571	2.14676	-0.684433	3.57393	2.6559	2.17593	-1.16716	-3.09152	0.856435	0.115465	-3.65041	-3.65041
Adamts6	1.32841	1.10745	1.14909	1.44824	1.65509	1.59206	1.18701	1.41769	0.984613	1.04969	1.54011	1.41479	2.49938	1.88629	2.30846	1.97347	1.27813	1.33486
Adamts7	2.82701	2.84381	2.87758	2.74468	2.48041	2.61956	2.41191	2.16633	1.94261	2.75221	2.37044	2.18705	2.54455	2.09154	2.56318	3.06831	2.36103	2.3276
Adamts8	-1.34595	-1.92984	-0.754426	-0.627486	-0.634431	-2.34341	-1.31034	-1.44368	-1.82053	-1.82243	-1.70878	-1.78906	-2.32536	-3.65041	-1.93324	-3.65041	-1.73919	-3.65041
Adamts9	3.42644	3.52773	3.32876	3.15338	3.4847	3.91384	2.74978	2.88085	2.30137	3.87008	3.34329	3.34239	3.30895	3.38424	2.93377	3.10618	2.77046	3.31611
Adamtsl1	-0.86178	-0.897846	-0.310088	-0.467948	-1.20927	-0.672234	-1.70769	-1.44368	-1.51069	0.42105	0.134753	-0.360836	-1.6465	-2.37576	0.486049	-0.927632	-0.29931	-2.90052
Adamtsl3	-0.210846	0.11789	-1.24559	-1.70508	-0.0562534	-0.21366	0.114719	0.00174721	-0.535171	-1.3054	-0.137113	0.34263	-0.558353	-0.719886	0.994769	1.49154	0.758939	-1.30274
Adamtsl4	1.45763	1.48102	1.59942	1.93592	1.65509	1.47508	1.01519	0.807347	0.934295	1.23538	1.2046	1.45213	1.27349	0.887959	0.892282	1.62793	0.935193	0.409495
Adamtsl5	-2.07999	-1.62862	-0.388676	-0.324309	0.31503	-0.672234	-2.50051	-2.16079	-2.46293	-1.82243	-0.198223	-2.74135	-0.122095	-1.25584	0.620357	0.940903	-0.29931	1.06228
Adap1	2.79639	3.06479	2.89345	3.52938	2.71634	2.68336	2.74003	2.53154	2.48823	2.6354	2.83432	2.52159	2.67214	2.25875	1.74815	2.14696	3.00061	0.151958
Adap2	-1.66678	-2.10788	-1.76882	-0.324309	-1.09613	-0.502659	-2.50051	-1.23369	-1.05945	0.459915	0.405106	-0.904989	-3.65041	-3.65041	-2.55014	-0.782197	-3.65041	-3.65041
Adar	6.45947	6.43293	6.37719	6.35644	6.11577	6.28175	6.19264	6.25006	6.17622	6.17196	5.93043	6.05745	6.31732	6.38828	5.96109	6.15328	6.40487	5.7148
Adarb1	5.39573	5.49307	5.44111	5.42851	5.69193	5.39237	5.5365	5.5287	5.71665	5.47347	5.40721	5.48237	6.06146	5.742	5.48106	5.63066	5.86348	5.05239
Adarb2	0.0948746	0.300303	-0.0774866	0.509051	0.32319	0.357379	-0.379165	-0.198236	-0.0876789	-0.281019	0.225967	-0.309938	2.17488	0.487666	1.82064	1.34724	0.135551	2.4701
Adat1	4.24876	4.35995	4.13779	4.37821	4.21892	4.19756	4.01944	4.13688	4.2256	3.95566	4.0783	3.781	4.65924	4.43284	4.48392	4.14203	4.31895	4.68294
Adat2	1.68581	1.16347	1.5156	0.979555	1.06411	1.47508	1.06066	1.6865	1.5667	1.77002	1.63074	1.19013	1.92226	0.31926	1.6677	-0.313796	-0.435689	0.220779
Adat3	-0.0499027	1.47313	0.376686	-0.610714	1.15606	0.348537	0.311878	0.245528	0.630483	1.12417	1.44339	1.16561	-3.65041	0.659255	0.971498	1.64604	1.26499	1.02428
Adck1	3.85883	3.93913	3.99497	3.89462	3.86189	3.9413	3.46419	3.88433	3.70351	3.87728	4.0621	3.64532	3.81829	3.69874	3.644	3.78567	3.903	3.01461
Adck2	2.55683	2.3439	1.47178	1.84766	2.15541	2.38028	1.83639	1.24964	1.90261	2.02311	2.10173	1.83654	0.685454	2.46086	2.03143	2.51385	2.11472	2.17986
Adck3	5.31787	5.14669	5.1492	5.33571	5.28288	4.93921	5.1252	5.09621	4.90483	5.03474	4.87525	4.87803	5.06162	5.37858	4.58486	5.28335	5.09782	4.72589
Adck4	3.60631	3.6175	3.12958	3.44867	3.49602	3.15583	3.26055	3.13231	3.04012	3.31302	3.04346	2.87363	3.92462	3.95014	3.69716	3.83216	2.74703	3.80553
Adck5	4.45708	4.34424	4.44389	4.61185	4.3928	4.30457	4.63876	4.61173	4.53257	4.61908	4.43138	4.41515	4.17495	4.06826	3.04225	3.25684	3.17349	4.07037
Adcy1	2.47574	2.62256	2.97182	3.29083	3.61256	2.55089	2.28067	2.36005	2.06809	2.49276	2.52778	2.3313	2.78309	2.19488	1.72249	2.41173	3.2753	-0.960363
Adcy10	3.21665	3.44539	3.53921	3.62497	3.16987	3.29636	3.23747	2.76827	2.55552	3.02196	2.93736	3.05142	5.54177	5.52955	6.60684	6.47728	6.39335	7.11661
Adcy2	-0.968453	-0.602597	-1.10626	-1.53722	-2.17934	-0.424803	-2.05031	-0.22227	-1.65731	0.0766301	-0.262037	-0.178576	-0.219423	-0.551092	-1.17123	1.30879	-0.435689	-3.65041
Adcy3	4.40194	4.2575	4.36824	4.45614	4.60827	4.1886	4.07118	4.20785	4.1565	4.25509	4.43893	4.05118	4.31622	3.92137	3.15647	3.77454	4.08786	3.42949
Adcy5	3.79952	3.89313	3.74646	3.86158	3.16534	3.83255	3.69583	4.26753	3.89722	3.91739	3.92268	3.92074	2.85059	2.57473	2.21247	1.09948	2.16274	0.467287
Adcy6	3.28209	3.3978	2.88595	2.99119	3.15394	3.23772	2.44829	2.52144	2.38804	3.14631	3.16733	2.59019	3.77662	3.40851	2.60267	3.30729	2.01359	4.02443
Adcy7	2.64088	2.84992	3.15196	2.81697	2.57826	3.09304	3.25224	3.43969	3.02698	3.74497	3.10483	3.15186	2.13606	1.46198	1.5803	1.46265	1.36281	1.8513
Adcy8	-2.07999	-2.10788	-2.98079	-1.38687	-1.98545	-1.46828	-2.72903	-3.16726	-2.3842	-3.65041	-2.37498	-3.12543	-1.8812	-1.70975	-0.373316	-2.88472	0.701571	-3.65041
Adcy9	5.06924	5.20506	4.95801	4.92926	4.54862	5.02165	4.67503	4.50013	4.44521	4.56068	4.64868	4.39348	5.1155	5.08227	4.94396	5.30793	5.20463	5.53392
Adcyap1r1	2.52081	2.60532	3.05211	3.04377	2.47217	2.96439	2.91487	2.42106	2.38711	2.75482	2.77515	2.76432	3.01367	3.00132	3.55567	2.45785	3.21166	0.861398
Add1	6.42043	6.44307	6.35618	6.30137	6.59539	6.32549	6.39208	6.55847	6.44018	6.45531	6.36267	6.52034	6.14595	6.32872	6.12458	6.23234	5.99498	5.77196
Add2	1.51617	1.86456	1.8076	2.05107	2.31839	1.83297	1.77634	1.4621	1.16998	1.62556	1.68251	1.50639	2.17488	1.62946	2.38594	2.99957	3.07528	2.74471
Add3	6.16301	6.04948	6.15626	6.09009	6.30264	6.21871	6.06883	6.04693	6.05636	5.97351	5.9464	5.87779	5.91751	5.76288	5.13373	5.45822	5.64377	5.75741
Adgb	1.39447	0.931938	1.20368	0.637442	1.15835	1.41282	0.38877	-0.553128	-0.336761	-0.818338	-1.25477	-0.727512	2.54455	2.56557	3.43082	2.75934	3.44997	3.69377
Adgra2	1.49625	2.03621	1.77192	1.42809	1.50175	1.97042	1.65706	1.98824	1.2748	2.5579	2.31793	2.05978	0.763941	-0.0796955	1.29176	-0.0412639	0.324745	2.51738
Adgra3	5.41787	5.30629	5.47742	5.43496	5.80478	5.42664	5.26761	5.53534	5.37001	5.52681	5.4291	5.40093	4.85662	5.14353	4.75001	4.82812	4.96835	4.91429
Adgrb1	0.373449	0.157842	1.23022	1.08883	2.23218	0.718137	-0.0689548	1.00661	0.0415375	-1.04141	1.00219	0.626861	0.862361	-3.65041	2.43538	-2.38716	-0.29931	3.55473
Adgrb2	2.31675	2.33608	2.70856	2.78484	3.73842	2.3137	2.22385	2.54584	2.11063	2.42235	2.60315	2.38345	-0.558353	2.15394	0.961409	-2.88472	2.4215	0.677758
Adgrb3	-0.422034	0.271458	0.576073	-0.0739116	0.797449	0.184337	-0.337277	-0.547045	-0.465958	0.27855	-0.549926	-1.47687	0.602449	2.01291	0.856435	0.854561	0.558115	2.07224
Adgrd1	-0.499908	-0.602597	0.538339	-0.132555	-0.224479	0.785196	-1.70769	-2.59044	-1.82053	-2.63594	-2.11721	-3.65041	0.544335	-3.65041	0.703417	0.854561	0.758939	-3.65041
Adgre1	-3.65041	-3.65041	-3.65041	-3.65041	-3.65041	-3.07372	-3.65041	-3.65041	-3.65041	-3.65041	-3.65041	-3.65041	-0.838592	-0.263231	-0.390442	-0.52907	-2.70898	-1.75252
Adgre5	0.913601	0.624987	1.17664	0.834012	1.92012	1.18347	1.34421	1.38624	1.55509	1.15871	1.44339	2.03539	0.81399	0.444378	0.337942	-0.313796	0.406802	1.02428
Adgrf1	-0.17208	-0.357627	-0.754426	-0.257519	-0.557497	0.233189	-0.123853	0.706565	0.0883091	-0.302541	0.0843246	-0.646342	0.420574	-0.399993	-3.65041	-0.927632	-0.586318	-0.683854
Adgrf3	-3.65041	-3.18301	-3.65041	-2.68663	-3.12127	-3.65041	-3.15847	-3.20507	-3.13859	-3.05578	-2.68906	-2.43832	-3.65041	-3.65041	1.29176	-0.0412639	-1.42338	-3.65041
Adgrf4	-2.34156	-1.62862	-1.39984	-2.11394	-0.634431	-1.21138	-1.56273	-1.23369	-2.0046	-3.05578	-1.25477	-1.34292	-3.65041	-1.89952	-1.03035	0.898378	-0.944972	-3.65041
Adgrf5	0.283338	0.442945	1.03329	-0.0175587	-0.48446	0.581439	0.326844	0.657362	0.649323	-1.04141	0.0320694	1.02895	-0.650372	-0.719886	1.88965	-0.450018	-2.09808	1.14606
Adgrg1	3.81568	3.94257	4.0593	3.98773	3.75736	4.11915	3.95256	3.80331	4.21984	4.31785	4.03348	4.24687	3.54211	3.71787	2.19822	2.97931	2.98601	3.09564
Adgrg2	-1.79836	-1.37955	-0.164696	0.0366755	0.355379	-1.09826	-1.09559	-1.77225	-0.229618	-0.808041	-0.549926	-1.22036	-1.98008	-0.812318	-0.461053	-3.65041	-2.70898	-3.65041
Adgrg4	-1.49747	-1.16722	-3.03033	-1.53722	-1.61426	-1.49987	-2.05031	-1.68951	-2.0046	-3.05578	-3.0911	-1.78906	-1.39837	0.27502	-2.99783	0.0392277	-3.65041	-0.451914
Adgrg6	-0.968453	-1.37955	-0.653935	-0.627486	-0.48446	-1.08623	-1.09559	-2.35968	-2.0046	-1.04141	-1.54106	-1.97479	-1.94636	-3.65041	-2.20897	0.44586	-0.0600335	-0.451914
Adgrl1	7.79661	7.92963	7.66134	7.79397	7.62799	7.71614	7.61314	7.64803	7.58823	7.61621	7.60246	7.65727	7.58606	7.60058	7.24004	7.32655	7.39235	7.27776
Adgrl2	6.03087	6.06131	5.82964	5.47357	5.30596	5.93927	6.1637	6.39726	6.28249	6.29349	6.34678	6.42144	5.28921	5.72031	5.67887	5.9896	5.58771	5.64765
Adgrl3	5.0176	5.07155	4.763	4.4971	4.40198	5.00873	4.75466	4.67279	4.90304	4.70966	4.98033	4.79218	5.77048	5.8577	5.32259	5.87626	5.1046	5.49798
Adgrv1	5.97052	6.11798	5.99537	6.17021	5.6682	5.98999	5.5753	5.33335	5.51604	5.25791	5.45736	5.30278	7.09041	6.76832	7.26887	7.00062	6.75067	6.88788
Adh5	4.9148	4.8523	5.15441	4.98549	5.16566	5.12396	5.01098	4.9056	4.99213	5.02217	5.01625	5.00454	4.88323	5.13582	4.76459	4.64412	4.87052	4.8454
Adh6b	0.462375	0.794235	0.616873	-0.0175587	0.0459017	0.383583	-0.020798	-0.128449	0.588801	-0.0390301	-0.71874	0.457256	1.08252	0.887959	-0.390442	-1.2716	2.09009	1.45685
Adhfe1	-1.34595	-3.65041	-1.76882	-1.89508	-1.77919	-1.00466	-1.56273	-1.33487	-1.3776	-1.82243	-3.0911	-1.47687	-3.65041	0.403866	-0.0814637	-0.313796	-2.70898	-3.65041
Adi1	3.25746	3.18519	3.35733	3.42141	3.71535	3.27844	3.48686	3.7515	3.5499	3.76192	3.49094	3.53697	3.12293	2.68872	2.88122	3.05773	2.9726	2.43288
Adig	-3.65041	-3.18301	-3.65041	-2.68663	-2.73497	-3.65041	-3.65041	-3.65041	-3.65041	-3.05578	-3.0911	-3.65041	-3.65041	-0.633022	-0.0135543	-0.0412639	1.48117	-3.65041
Adipoq	-3.0727	-2.54753	-2.26587	-2.68663	-3.65041	-2.08204	-1.43102	-1.83017	-1.82053	-2.04619	-2.37498	-1.22036	0.285192	-1.70975	0.892282	-3.65041	-2.70898	2.09074
Adipor1	5.91646	5.98355	5.87964	5.90385	5.76845	5.86769	5.89537	5.98793	5.96924	5.96416	6.06557	6.18699	5.83492	5.72433	5.75519	6.20774	5.87398	6.05937
Adipor2	6.26659	6.29479	6.35851	6.27988	6.17396	6.32464	6.12549	6.14354	6.19705	6.19374	6.15472	6.15189	6.44093	6.50898	5.97798	6.13382	6.25231	5.88216
Adk	4.86091	5.08599	4.87845	5.19241	4.91203	5.13525	5.02982	4.93442	4.77504	5.00201	4.80866	5.01378	5.06989	4.86071	4.76701	5.56199	5.19051	5.16626
Adnp	3.72317	3.51356	4.26228	4.42369	4.70532	4.82454	4.01193	3.69102	4.00048	4.4012	3.98654	3.63845	5.16624	3.88061	3.90094	3.63841	2.56243	1.36558
Adnp2	5.82061	5.64794	5.92198	5.94697	5.94359	5.72873	5.9613	6.0638	5.90128	5.9444	5.86659	5.95217	5.57698	5.83321	5.47841	5.4472	5.60736	5.04339
Ado	5.98908	6.06663	5.94058	5.71544	5.38325	5.7596	6.18715	6.27463	6.00731	5.99628	6.1117	6.15699	5.34645	5.22413	5.3407	5.40984	5.34315	5.46396
Adora1	1.836	1.26024	1.75191	0.28092	2.38618	2.58139	-0.823623	-0.430472	-0.942001	1.8551	1.22802	1.0989	1.27349	-1.54207	1.44444	-1.08939	0.484441	-3.65041
Adora2a	-1.49747	-0.537346	-0.754426	-1.38687	-0.414942	-0.584956	-0.337277	-0.22227	0.133612	-0.925568	0.485029	0.218105	-1.6465	-2.37576	-0.902003	-3.65041	-3.65041	-3.65041
Adora2b	0.972458	1.02128	0.0883653	0.489739	1.38965	0.647807	0.238592	0.547942	0.620971	0.234399	-0.137113	-0.122604	0.909163	0.73306	-0.152728	0.664635	0.324745	-3.65041
Adora3	-0.762454	-1.75646	-3.03033	-1.50587	-2.43057	-2.08204	-1.86885	-1.62402	-1.24413	-2.02218	-0.557913	-1.20866	-1.6465	0.919915	0.389019	-0.650089	2.36514	-2.40958
Adpgk	4.7308	4.89385	4.98164	5.12642	4.90695	4.99728	4.91211	4.87619	5.09706	5.07876	5.0112	5.01534	4.75459	4.86277	4.53442	4.99885	4.17884	4.43505
Adprh	5.8564	5.96537	5.67715	5.81364	5.5	5.64771	6.04216	6.14911	6.0108	6.01552	6.08117	6.1024	4.49177	4.95836	4.44884	4.49227	5.02206	4.95147
Adprhl1	-2.6613	-2.10788	-1.24559	-2.37205	-2.43057	-2.66284	-2.25792	-1.44368	-0.850939	-1.82243	-0.631865	-0.813523	-1.94636	-3.65041	-0.152728	-0.313796	-0.0600335	-3.65041
Adprhl2	3.85922	3.82993	3.90312	3.84229	3.71535	3.24905	3.54	4.09081	4.03491	3.94429	3.80694	4.0362	3.17173	3.46965	2.44747	2.58261	2.20922	2.67284
Adprm	2.23498	2.4919	2.85218	2.55332	2.58676	2.40074	2.53783	2.44339	2.46094	2.23463	2.2021	2.83669	2.38649	2.49982	2.48317	2.58261	2.80113	1.99575
Adra1d	-3.65041	-3.65041	-3.65041	-3.65041	-3.65041	-3.65041	-3.65041	-3.65041	-3.65041	-3.65041	-3.65041	-3.65041	0.420574	-3.65041	-3.65041	-3.65041	-2.70898	0.286466
Adra2a	0.0842393	-0.00906394	0.0291387	-0.0175587	-0.557497	-0.0883197	0.198471	0.51924	0.379085	0.234399	0.405106	-0.427092	-1.00218	-3.65041	-1.17123	-0.313796	-3.65041	-3.65041
Adra2b	-2.6613	-1.49872	-1.27515	-0.627486	-1.96544	-1.49987	-1.56273	-0.609065	-0.276257	-0.818338	-0.631865	-1.34292	-2.32536	-0.551092	-0.390442	-2.88472	-3.65041	-3.65041
Adrb1	1.13586	1.54268	1.03329	0.188123	0.610054	1.43387	1.93858	2.66199	2.36922	1.30819	2.02761	2.6233	1.16196	0.229381	1.15089	0.55939	-1.16443	2.2474
Adrbk1	5.40591	5.47895	5.30557	5.00772	5.80478	5.4227	5.40606	5.70694	5.50305	5.57813	5.56713	5.57773	5.34176	5.30197	4.86023	5.46752	5.21292	5.19219
Adrbk2	3.65877	3.95112	3.5707	3.76849	3.21552	3.76356	2.89241	2.52361	2.84216	3.0999	2.73974	2.66366	4.6448	4.75938	4.47301	4.49512	4.34987	4.89862
Adrm1	6.70229	6.67778	6.60404	6.5686	6.68747	6.54084	6.82207	7.07652	7.00949	6.93339	6.79534	7.00091	6.28075	6.56975	6.0201	6.48323	6.48273	6.43387
Adsl	6.04139	5.98216	5.96122	5.96762	5.85023	5.87838	6.21895	6.36768	6.28582	6.19446	6.27679	6.18249	5.18181	5.31309	5.33599	5.63422	5.41654	5.18144
Adss	5.4415	5.34152	5.39757	5.37308	5.55366	5.43044	5.77521	5.87989	5.98624	5.62627	5.6289	5.81379	5.3709	5.35487	4.93968	5.26882	5.29897	5.13984
Adssl1	-1.85864	-1.92984	-2.26587	-1.0118	-0.414942	-0.97107	-2.7923	-3.65041	-1.14342	-1.62876	-1.89859	-1.34292	0.420574	-3.65041	-3.65041	-3.65041	-3.65041	-3.65041
Aebp1	5.99752	6.03407	5.67027	5.66865	5.28797	5.71052	6.20225	6.36082	6.28626	6.30243	6.37459	6.36021	4.60271	4.46986	3.70221	3.46057	4.52038	3.85454
Aebp2	5.25421	5.26573	5.22043	5.31926	5.21295	5.34551	5.39178	5.32498	5.55715	5.24529	5.30219	5.24544	5.48149	5.36149	5.36035	5.35822	5.24729	5.15333
Aen	5.4355	5.61558	5.43584	5.57498	5.59226	5.43554	5.38777	5.58544	5.63866	5.54864	5.65322	5.59599	4.74817	5.10819	4.75878	4.25757	4.79063	4.75548
Aes	5.62811	5.68763	5.50227	5.3678	5.43641	5.56199	5.57324	5.80302	5.59002	5.75121	5.78497	5.84474	4.47631	5.06613	4.81215	4.36843	4.63121	4.13421
AF357399	0.0298542	-0.982171	0.732776	1.06032	0.57631	0.817592	0.114719	-0.487581	0.771865	0.803323	0.320495	-0.646342	2.58835	0.699979	2.29513	2.45638	2.29791	2.67284
Afap1	3.30517	3.12145	3.17946	2.62587	3.56432	3.24964	3.09175	2.85811	3.05079	3.37816	3.23188	3.10574	4.9519	5.00988	5.73065	5.22217	4.94107	5.36728
Afap1l1	4.4545	4.43848	4.0886	4.17136	3.67606	4.0007	4.65293	5.15453	4.87012	4.86615	4.76731	4.8746	2.64475	2.75464	0.74322	2.78291	3.2753	2.92051
Afap1l2	4.79131	4.65111	4.32888	4.61986	3.76861	4.40126	4.44319	4.4682	4.33534	4.63048	4.44369	4.20292	4.39643	4.71516	3.13419	3.94092	4.15529	4.03259
Aff1	6.89764	6.91377	6.70328	6.66548	5.93953	6.66076	6.7392	6.67198	6.64672	6.55166	6.53632	6.69408	7.06344	7.20106	6.7368	6.76873	7.04941	6.86515
Aff2	-0.348149	-0.148278	0.0767129	-0.806885	0.394631	0.849277	-1.19897	-0.487581	-0.399914	0.46417	0.320495	-0.122604	0.420574	0.27502	-0.902003	1.77621	-3.65041	-3.65041
Aff3	7.36469	7.3494	7.24358	7.48565	6.75746	7.07994	6.9649	6.90415	6.88214	6.91033	6.76314	6.69652	7.12917	7.08498	6.5385	6.97968	6.51315	6.6269
Aff4	5.9174	5.81326	6.02684	5.83082	6.02237	6.1019	5.47884	5.20946	5.12999	5.20026	5.38134	5.1954	6.15932	6.0489	6.13621	6.3875	6.1682	5.75291
Afg3l1	4.84742	4.68909	4.87845	4.69219	4.96808	4.92441	5.11702	5.15208	5.29834	5.33107	5.16758	5.17321	3.92462	4.05459	4.29096	4.68535	4.58349	4.27436
Afg3l2	6.20426	6.08999	6.15712	6.09649	6.2793	6.16149	6.30384	6.33326	6.36375	6.30094	6.26778	6.27617	5.92037	5.89481	5.75641	5.86388	5.83004	5.45578
Afmid	2.29155	2.14358	1.65533	2.21762	1.40318	1.66687	2.2893	2.18928	1.8921	2.33909	2.23368	2.28342	1.38365	2.36914	2.18383	0.704673	0.675324	3.07998
Afp	3.85922	3.78567	3.78277	3.88024	3.43379	3.78009	4.49421	4.20357	4.3926	4.0221	4.16941	4.25244	3.07242	2.35858	2.97614	3.23137	3.17349	3.24354
Aftph	5.09777	5.08974	5.31784	5.28466	5.68819	5.39506	5.37501	5.19127	5.35562	5.21595	5.34002	5.122	5.6784	5.72433	5.30142	5.73221	5.92011	5.94071
Aga	2.10948	1.97043	1.75374	2.0191	1.83707	2.14524	2.14265	2.23766	2.02907	2.26054	2.10553	2.34427	1.34332	1.9154	2.01526	1.845	1.40335	1.28109
Agap1	7.22531	7.34402	7.22321	7.0978	7.09124	7.16746	7.21969	7.45749	7.24407	7.36496	7.33338	7.16949	7.07824	7.19413	7.1493	6.97591	7.26386	7.30074
Agap2	3.74991	4.00139	3.51782	3.66038	3.22644	3.60555	3.91282	4.12717	3.98326	3.98926	4.0595	4.33472	2.69903	1.90092	1.87897	2.51385	2.73913	1.33486
Agap3	6.63892	6.65811	6.65022	6.66209	6.52517	6.45135	6.55088	6.48759	6.40527	6.57435	6.53045	6.49434	6.02885	6.31506	5.59312	5.59265	5.73991	5.74724
Agbl1	-0.582226	-0.0539922	-0.559991	-0.905709	-0.634431	-0.672234	-1.43102	-2.35968	-1.14342	-1.04141	-1.54106	-1.1074	0.135777	-0.719886	-0.0135543	0.809372	1.23386	1.23858
Agbl2	0.913601	0.734722	1.4266	1.44824	2.04872	1.23235	0.352665	-0.271572	-0.684433	-0.454861	0.560755	-0.813523	2.69903	2.73027	3.16455	3.5457	3.20823	4.39838
Agbl3	2.90387	2.38655	2.7991	2.80373	3.01412	2.76868	2.22185	2.25168	2.26416	2.39475	2.39754	2.42066	3.29404	3.54237	4.23657	3.69665	4.14636	4.16553
Agbl4	0.0842393	-0.100365	-0.0326237	0.640948	0.432844	0.611314	-0.460338	-1.32442	-1.14342	-0.232015	-0.549926	-0.904989	1.99132	2.1661	2.1693	2.73538	2.67434	2.2638
Agbl5	5.37502	5.48975	5.49805	5.51332	5.56122	5.45021	5.31189	5.16649	5.01758	5.24096	5.28708	5.30941	5.97088	5.75887	6.37781	6.23041	6.16393	5.92275
Agfg1	5.06924	5.19669	5.25331	5.32349	5.67629	5.24948	5.44954	5.37379	5.41302	5.29122	5.41488	5.34172	5.77633	5.54721	6.07952	5.83866	5.87776	5.86331
Agfg2	3.95354	4.04439	4.14199	4.2961	4.25536	4.01124	4.33908	4.63148	4.62033	4.63119	4.54761	4.67587	3.62155	3.39978	3.69716	3.39325	2.65768	3.14162
Aggf1	6.93691	6.87852	6.76187	6.89098	6.66567	6.70942	6.99116	6.99421	6.94746	6.90535	6.8553	6.75184	6.24391	6.41909	5.78291	6.0417	6.32151	5.6
Agk	4.18206	4.09311	4.24644	4.07098	4.33748	4.24656	4.46068	4.41893	4.61335	4.39174	4.19042	4.25772	4.02578	3.89932	4.61976	3.91555	4.1677	4.52318
Agl	5.49781	5.67556	5.65614	5.50264	5.78747	5.71084	5.55211	5.46898	5.40392	5.36446	5.47496	5.45366	6.02925	5.91918	5.8561	6.09681	6.0932	5.93329
Ago1	5.73076	5.88717	5.82584	5.83053	5.98581	5.72596	5.65825	5.503	5.75122	5.49077	5.63527	5.42742	5.94458	6.08033	5.70317	5.68718	5.67226	5.92726
Ago2	3.73299	3.95112	4.0489	3.73526	4.44795	4.11947	4.42678	4.75741	4.6721	4.65372	4.56702	4.74539	2.28545	1.90092	2.56763	1.82244	1.32109	2.66175
Ago3	5.52841	5.79176	5.78335	5.76437	5.97185	5.92559	5.67881	5.5314	5.7932	5.4424	5.58265	5.64478	6.21394	6.28833	5.92044	6.42646	6.4035	6.17575
Ago4	2.16857	2.1195	2.6991	2.9423	3.57717	2.46043	1.88523	1.4636	1.67792	1.73524	1.57705	1.72045	3.08267	2.53776	2.77001	2.85139	1.7872	3.04908
Agpat1	4.7308	4.76057	4.70954	4.71772	5.1614	4.82234	4.76363	4.99574	4.8294	4.95196	5.11689	5.12778	5.28256	5.43118	6.17729	5.93398	5.9096	6.02009
Agpat2	1.21111	1.58725	1.09524	1.16142	0.797449	0.910632	1.16844	0.943198	1.79534	1.52733	1.63074	1.78039	3.8842	3.71746	5.31799	5.1695	4.64396	5.36937
Agpat3	3.59465	3.73044	3.8399	3.62541	3.54656	3.91758	3.11349	3.09486	2.95876	3.53755	3.33792	3.29282	5.67146	5.89115	7.0582	6.85798	6.52008	6.93856
Agpat4	1.44937	1.84756	1.4651	1.13928	1.40703	2.1025	1.28605	1.42079	1.53329	1.71753	1.75201	1.96221	0.34769	-0.68451	-2.84837	1.34724	1.11683	-2.84319
Agpat5	4.93843	4.78788	4.71472	5.06593	4.77837	4.67939	4.90714	4.84473	4.86156	4.69526	4.75224	4.8587	4.60377	4.80871	4.17569	4.22954	4.6662	4.44802
Agpat9	-2.34156	-1.77138	-1.57257	-2.68663	-1.96544	-2.66284	-1.86885	-2.35968	-2.76156	-3.05578	-1.89859	-2.74135	-1.6465	-0.719886	0.994769	0.20193	1.55501	-1.51017
Agps	5.7093	5.74211	5.89424	5.82707	6.01931	5.77885	6.13542	6.0407	6.13016	5.86417	6.00688	6.02754	5.55139	5.2199	5.1796	5.25835	5.50629	5.65092
Agrn	5.81157	5.82432	5.62473	5.87437	6.00599	5.72019	5.2591	5.25685	5.21253	5.23007	5.36268	5.2481	5.79669	5.6033	5.01478	5.18085	5.49484	5.21978
Agt	-1.34595	-1.26949	-0.0326237	-1.38687	-0.110178	-0.350935	-3.65041	-1.13915	-3.65041	0.0766301	-1.39083	-2.74135	-1.94636	-3.65041	-3.65041	-1.72414	-3.65041	1.71481
Agtpbp1	5.87725	6.0934	5.95099	6.0988	6.19753	5.99761	5.87595	5.74509	5.6366	5.64828	5.61321	5.65142	6.63579	6.65184	7.25125	6.87412	6.7878	7.3765
Agtr1a	-1.85864	-2.31102	-3.03033	-1.89508	-1.77919	-1.86085	-3.15847	-1.44368	-2.21564	-1.3054	-0.909957	-1.97479	-1.00218	-3.65041	0.172872	-2.88472	1.32109	1.02428
Agtr2	-3.0727	-3.65041	-2.59805	-3.65041	-3.65041	-2.08204	-2.7923	-0.741727	-3.65041	-0.376691	-0.472391	-3.65041	-3.65041	-3.65041	-3.65041	-3.65041	-3.65041	-3.65041
Agtrap	3.91692	3.93339	3.63915	3.70293	4.05831	3.9758	3.31925	3.22009	3.12277	3.37591	3.47243	3.59905	3.75564	3.55491	2.98447	3.89028	2.75488	2.90072
Ahctf1	7.96138	8.02445	7.99741	7.99741	8.06699	7.97561	8.2471	8.16599	8.19342	7.99926	8.01625	8.10648	8.09034	8.18969	8.19214	8.19969	8.19866	8.23252
Ahcy	6.05303	5.83553	5.99731	6.02702	6.0262	5.96218	6.23237	6.49907	6.59441	6.30539	6.24142	6.26572	5.31551	5.21903	4.98603	4.92133	4.97475	5.32512
Ahcyl1	6.05396	6.08669	6.07257	6.12328	6.21764	6.03812	6.39264	6.47914	6.46747	6.40902	6.31986	6.38522	6.05002	6.26016	5.86413	6.05022	6.1927	5.50851
Ahcyl2	5.24633	5.3211	5.22258	5.26364	5.51277	5.3405	5.04135	5.1593	5.21885	5.03205	5.3415	4.98142	5.99887	6.01113	6.55348	6.35691	6.08263	6.36712
Ahdc1	6.80519	6.89035	6.75783	6.87735	6.23498	6.76748	6.78025	6.7805	6.69223	6.88606	6.79092	6.76831	6.29943	6.52104	6.33147	6.15678	6.39749	5.96097
Ahi1	5.25258	5.22282	5.13523	5.49794	5.00691	5.06951	5.24686	5.17652	4.96246	5.14485	5.17226	4.91025	5.34134	5.58519	5.30308	5.48361	5.38753	5.42329
Ahnak	4.84151	4.79897	5.84034	4.12517	5.58273	6.06864	3.09722	4.20807	2.90817	5.67181	5.22704	4.69157	3.64938	3.50407	3.90006	3.73883	3.49756	4.94512
Ahnak2	1.23535	0.596197	1.75374	0.56548	1.80829	2.20769	0.707406	0.98578	0.261563	0.698887	1.00219	0.923898	-1.94636	-1.25584	-0.47926	0.256823	-1.73919	2.47575
Ahr	2.64992	2.74236	2.72732	2.92083	3.04714	3.01137	3.03593	2.76338	2.77869	2.42235	2.78781	2.72596	2.93217	2.63722	0.927259	2.77118	3.06395	-0.0767101
Ahrr	-1.66678	-1.07173	-0.862444	-0.627486	-1.33206	-1.49987	-0.999124	-0.96684	-1.65731	-0.71853	-1.39083	-2.74135	0.544335	-0.812318	0.532222	0.115465	0.145146	-3.65041
Ahsa1	6.16774	5.92543	5.90859	5.9558	5.97063	5.96399	6.18951	6.40856	6.40937	6.39656	6.27412	6.34422	5.62841	5.81005	5.50339	5.66261	5.51557	5.08783
Ahsa2	4.15468	3.86655	3.68543	3.61654	3.60672	3.74767	3.89724	4.18084	3.99589	3.91312	3.9724	3.88364	3.0621	2.87808	2.37331	3.3701	2.77201	2.64807
Ahsg	-0.348149	-0.468822	-0.164696	-0.467948	-0.634431	0.37054	0.0258031	-0.887834	-0.535171	0.0766301	-0.398812	-0.360836	-0.691679	1.42196	-0.152728	0.44586	-1.73919	-2.40958
Aida	4.1805	4.07757	4.15244	4.0028	4.51227	4.13595	4.02116	3.97166	3.98635	3.99221	3.8487	4.08486	4.55531	4.23631	3.52517	4.34843	4.19047	3.71837
Aif1	-2.6613	-3.18301	-3.65041	-3.08949	-3.65041	-3.07372	-3.65041	-3.65041	-2.76156	-2.63594	-3.65041	-3.65041	3.36038	4.28982	6.09902	6.1868	6.22712	5.97722
Aif1l	-1.08365	-1.77138	0.303591	0.139386	1.83564	0.0214442	-0.279472	-1.13915	-0.336761	0.506038	-0.0784867	-0.178576	0.420574	-0.263231	1.15089	-2.01789	-2.70898	2.35847
Aifm1	6.19348	6.16976	6.12743	6.13429	5.97953	6.08869	6.52267	6.60356	6.56577	6.38117	6.44373	6.47463	5.71837	5.87364	5.31303	5.59432	5.96482	5.20499
Aifm2	3.47711	3.41315	3.13169	3.50602	3.12506	3.06565	3.03593	3.10504	2.85439	3.19255	3.10483	2.74865	3.1621	2.9911	2.44747	3.37786	3.54454	2.54448
Aifm3	5.24812	5.37569	5.23049	5.42623	5.24432	5.11242	5.33057	5.5588	5.49883	5.34252	5.49766	5.45653	4.83557	4.64953	3.40624	4.76739	4.19682	4.72174
Aig1	3.27627	3.15293	3.08883	2.94797	2.8288	3.07707	2.83926	2.64216	2.81391	2.76175	3.11114	2.95782	3.66242	3.70042	3.85126	4.10417	3.41073	3.46538
Aim1	5.98059	5.86033	6.12478	6.20999	5.56241	5.87828	5.2283	4.71785	4.85499	4.72259	4.71233	4.69157	6.3108	6.67351	5.77213	6.24417	6.13849	5.96849
Aim2	1.5932	1.41332	1.11816	1.03123	0.960664	1.1303	2.07668	1.95541	2.61902	1.58707	1.64473	2.2615	1.07843	-0.911079	0.343132	0.928276	1.90201	0.861398
Aimp1	6.12135	6.03003	5.92807	6.02869	5.68927	5.77174	6.19143	6.27168	6.18297	6.18804	6.03536	6.08297	6.07332	6.06523	5.63485	5.95345	5.8919	5.919
Aimp2	4.235	4.41477	4.64984	4.66705	4.57448	4.47699	4.64736	4.75387	4.6849	4.64062	4.8268	4.78799	4.28151	4.10979	4.04644	4.4851	4.20774	3.95896
Aip	4.48008	4.26894	4.46332	4.23682	4.43789	4.27892	4.51702	4.59601	4.59241	4.62646	4.66379	4.62773	3.24562	4.21276	3.43082	3.94092	4.0634	3.78238
Aipl1	0.0298542	0.885103	0.732776	0.637442	0.0459017	0.573873	0.919712	1.25313	1.48166	0.991931	0.798288	0.784475	-1.94636	0.858281	-0.573907	0.664635	0.324745	1.91499
Airn	-1.22199	-1.16722	-0.569115	-0.498475	-0.801819	-1.37747	-1.75418	-1.06774	-0.486375	-0.0694544	-0.406004	-2.43832	-1.39837	-3.65041	-0.583723	-2.88472	-2.39906	-3.65041
Ajap1	-0.277865	0.41024	0.939908	0.56548	-0.557497	0.37054	-0.397496	-0.887834	-0.535171	-0.53751	-0.0221499	-0.360836	-0.838592	-0.138317	-1.17123	0.0392277	-3.65041	2.2474
Ajuba	4.83359	5.09489	5.01445	4.8819	4.85512	4.87543	4.72884	4.56826	4.63635	4.76847	4.73089	4.63991	4.95469	5.20377	4.97772	4.70089	4.25281	4.68385
Ak1	-1.49747	-2.31102	-1.76882	-2.68663	-2.43057	-1.08623	-2.7923	-1.98603	-2.46293	-1.62876	-3.0911	-2.43832	4.46068	5.16475	6.79908	6.66068	6.27993	7.16767
Ak2	4.5518	4.49611	4.66403	4.53621	4.76439	4.53659	4.55505	4.63834	4.86341	4.66831	4.67235	4.69741	4.01833	4.76199	4.13513	4.10417	4.51114	4.54984
Ak3	1.13586	1.08483	1.49386	1.52613	1.58894	1.83297	0.352665	0.460062	0.683235	1.48608	0.798288	0.813458	0.0548351	-0.329992	1.12099	1.02237	0.324745	1.61607
Ak3l2-ps	-3.65041	-3.65041	-3.65041	-3.65041	-2.02634	-2.08204	-3.65041	-3.65041	-2.08535	-3.65041	-3.65041	-2.03552	1.59019	-3.65041	0.703417	-3.65041	0.182899	-3.65041
Ak4	5.08099	4.87749	5.14206	5.12047	5.11852	5.07119	5.01228	4.96134	4.97698	4.91164	4.90606	5.08429	4.8298	5.29243	4.77207	4.87246	5.02369	5.22816
Ak5	1.59508	1.33184	1.20368	1.23285	0.541759	1.13287	1.26872	1.41769	0.959673	1.68144	1.05551	0.662343	0.135777	-1.25584	1.62573	0.940903	-0.174717	-3.65041
Ak6	5.92291	6.00513	5.95139	6.22518	6.05627	5.95856	6.56165	6.46561	6.52444	6.35112	6.33227	6.4944	5.87467	5.21917	5.66417	6.10314	6.04964	5.6428
Ak7	2.17359	2.39577	2.34562	2.53648	2.44064	2.32501	2.32607	1.90304	1.41166	1.84698	1.63425	1.37646	3.31765	3.72611	4.42885	3.10618	4.00598	4.10719
Ak8	2.42607	2.27291	2.92709	2.70336	2.30712	2.25577	1.71509	1.41769	1.55009	1.71753	1.54011	1.86589	3.27362	3.86279	4.45275	4.45534	3.9448	4.25398
Ak9	1.00101	0.760899	1.30703	1.97811	1.67276	1.32541	1.51728	1.30785	1.26262	1.31527	1.40281	1.14523	3.48918	3.47014	4.02561	3.47511	3.56434	4.10856
Akap1	6.12775	6.10667	6.07064	6.07478	5.84961	5.96037	6.0723	6.31046	6.32894	6.24486	6.22986	6.19864	8.66713	8.67707	9.52578	9.11493	9.1252	9.86597
Akap10	4.72161	4.79992	4.73779	4.69598	4.74876	4.72472	4.6631	4.8302	4.82492	4.74024	4.85753	4.87288	5.10298	4.86817	4.98437	5.02107	5.12201	5.11316
Akap11	7.64004	7.67189	7.72364	7.74182	7.91146	7.67278	7.97222	7.88776	7.989	7.77741	7.7788	7.75271	7.88463	7.77748	7.56932	7.71548	7.75259	7.89195
Akap12	6.48761	6.39952	6.4196	6.42604	6.41733	6.61408	5.82547	5.91268	5.77384	6.4035	5.99669	6.00573	12.4646	12.1053	12.9337	11.771	12.4505	13.2156
Akap13	8.49403	8.46205	8.33746	8.42146	8.23991	8.35075	8.3322	8.27763	8.18646	8.18993	8.14003	8.08963	8.6859	8.86951	8.36593	8.71143	8.47033	8.64466
Akap17b	5.11404	5.18586	5.18864	5.32893	5.27356	5.02685	5.17373	4.85625	5.07995	4.84387	4.86949	4.86598	4.81728	5.26584	4.85365	4.7315	5.03114	4.2784
Akap2	5.66013	5.41589	5.18949	4.72971	4.64352	5.31747	4.788	4.95077	4.6767	4.6759	4.83044	4.91895	5.28589	5.50319	5.13635	5.67668	5.0729	5.49711
Akap3	0.498869	0.342517	0.25272	0.28092	0.230778	-0.149629	0.38877	-0.609065	-1.0392	-0.625183	0.485029	-0.297489	3.77472	4.31188	6.36678	6.79207	6.96136	6.71594
Akap4	-0.86178	-0.742682	-0.471792	-0.324309	-0.48446	-0.97107	-0.908707	-1.33487	-1.25577	-1.82243	-2.11721	-1.78906	7.83924	7.96342	9.824	9.84157	9.27625	10.0959
Akap5	3.60352	3.59767	3.13661	3.68521	3.88344	3.40802	3.55596	3.41615	3.49281	3.42147	3.25941	3.15921	2.5768	3.31602	3.49051	2.80955	2.78588	3.18274
Akap6	1.64116	1.51218	1.57892	2.00284	1.45424	1.88892	1.0198	0.795427	1.14807	0.806677	0.657062	0.183	3.01795	1.63297	3.58115	2.63535	2.60997	1.54538
Akap7	3.07679	3.35805	3.20644	3.09067	3.57717	3.29694	2.75394	2.58791	2.21021	2.52773	2.85628	2.59103	3.52794	3.15325	3.82785	4.06626	3.59704	4.32603
Akap8	6.74717	6.78754	6.68121	6.7449	6.83664	6.64375	6.95512	7.07747	7.18723	7.02942	6.85201	7.03091	6.34099	6.60871	6.42759	6.32466	6.51084	6.34215
Akap8l	6.17167	6.0514	6.1168	5.85186	6.21292	5.96399	5.99462	6.07185	6.10266	6.08398	5.96916	6.01122	5.81524	6.02322	5.60262	5.15376	5.94264	5.56403
Akap9	8.46801	8.5537	8.3533	8.39645	8.46376	8.33526	8.38181	8.40631	8.2719	8.05188	8.21171	8.1398	9.02645	9.12592	8.7638	8.92479	8.75795	9.15968
Akip1	2.64088	2.61898	2.71797	3.01839	2.92511	2.61035	3.0245	3.09048	3.4188	3.09236	2.93024	2.98991	2.45275	2.01291	1.18019	2.38117	2.77046	3.22691
Akirin1	6.26732	6.30983	6.18537	6.29832	5.84111	6.17796	6.38316	6.26299	6.18566	6.1638	6.13859	6.29684	5.61453	6.1194	5.91403	6.22386	6.19587	6.28705
Akirin2	5.4389	5.64619	5.51838	5.6173	5.45858	5.53168	5.84591	5.70615	5.80393	5.62508	5.56942	6.0073	5.15487	5.2771	5.26428	5.55721	5.60736	5.32121
Akna	3.77079	3.87377	3.8182	3.73198	3.79085	3.93946	3.80038	3.90943	3.7987	3.86446	4.07346	3.7249	2.96577	3.47014	4.98396	4.07631	4.25281	5.0505
Aknad1	-3.65041	-3.18301	-3.03033	-2.37205	-3.12127	-3.07372	-3.65041	-1.98603	-3.65041	-1.45804	-3.65041	-3.65041	-2.84082	0.403866	1.68824	2.60922	3.33939	0.286466
Aknaos	0.0842393	1.10541	-0.0326237	1.06032	0.737648	0.718137	0.157203	0.630775	-0.399914	0.376602	0.829241	0.218105	-0.0309192	0.917039	1.74815	2.23504	1.04177	2.63552
Akr1a1	6.36597	6.34973	6.403	6.3953	6.07406	6.26496	6.59259	6.66634	6.72858	6.61186	6.62774	6.72239	6.17963	6.21712	5.7019	6.10501	5.97662	5.98713
Akr1b10	1.6502	1.46519	1.57685	1.3994	1.76401	1.79605	1.82326	2.03866	2.10382	2.10577	2.40269	2.07183	2.49938	2.48921	1.88076	0.714511	1.82052	2.57108
Akr1b3	6.39248	6.24755	6.39085	6.41776	6.38126	6.33832	6.62597	6.60253	6.56148	6.49477	6.47544	6.45494	5.91235	6.0081	5.74469	5.57302	5.60519	5.53882
Akr1b8	4.09931	3.82031	3.79171	3.40604	3.57717	4.24954	3.79669	3.77931	3.57064	3.92126	3.49094	3.87679	2.72542	4.09714	3.49576	3.85458	3.48817	2.81317
Akr1c12	-1.40466	-0.914322	-3.03033	-2.37205	-1.86931	-1.72399	-1.36942	-1.16687	-1.65731	-1.84331	-1.06069	-1.84231	-0.141042	0.403866	0.43835	-3.65041	-3.65041	-0.252149
Akr1c13	-1.59665	-1.35686	-2.26587	-3.08949	-1.86931	-1.45274	-1.95673	-2.51726	-2.0046	-1.61075	-1.20375	-2.99911	-0.199425	-0.719886	-3.65041	-3.65041	1.27813	-3.65041
Akr1cl	-0.210846	-0.0179384	0.76943	-2.37205	1.58894	0.998033	-1.86885	-1.44368	-1.65731	1.868	0.889222	1.04859	-1.94636	-3.65041	0.74322	-1.72414	-2.70898	1.02042
Akr1e1	3.58525	3.33689	3.37647	3.69452	3.02855	3.46435	3.22254	3.38506	3.22834	3.41159	3.25486	3.65055	3.66991	3.83258	3.59753	3.7568	3.18517	2.74471
Akr7a5	4.41791	4.28007	4.33164	4.42369	4.37304	4.34986	4.48798	4.44206	4.34525	4.55071	4.59341	4.57792	3.38542	4.1681	3.35578	3.79786	3.93792	4.2333
Akt1	5.57912	5.57512	5.74464	5.87995	5.93446	5.54383	5.37264	5.53561	5.49015	5.5089	5.46378	5.33299	4.85064	5.03993	4.36936	4.74356	4.42022	4.76386
Akt1s1	3.84354	3.83579	4.02938	3.65605	4.11846	4.16393	3.79299	3.97959	4.06182	4.17592	3.71007	3.52037	3.4737	3.40029	3.47877	3.78683	3.33939	2.48976
Akt2	5.7801	5.65851	5.75792	5.67924	5.79418	5.84635	5.7301	5.70527	5.82047	5.88535	5.85188	5.8075	5.77964	5.94314	5.64131	5.38098	5.80396	5.52221
Akt3	6.57389	6.52802	6.68361	6.7187	6.64496	6.44417	6.25149	6.16859	6.18163	6.1849	6.24429	6.14692	7.25158	7.1176	7.11378	7.16766	7.23705	7.66612
Aktip	4.14128	4.39652	4.08824	4.01534	4.77577	4.30857	4.19868	4.25931	4.31999	4.23873	4.07507	4.36146	5.08092	5.25392	5.72271	5.17106	5.34783	5.65342
AL365322.1	2.71082	2.7098	2.84361	2.72499	2.86279	2.80145	2.80894	3.01488	2.80763	2.83749	2.81898	2.81822	2.42081	3.18348	1.91427	2.01187	1.90483	3.4802
AL603984.1	-3.65041	-3.65041	-3.65041	-3.65041	-3.65041	-2.66284	-3.65041	-3.65041	-3.65041	-3.65041	-3.65041	-3.65041	-3.65041	0.229381	-3.65041	-3.65041	-3.65041	1.23858
AL669896.1	-2.85239	-2.8945	-0.991422	-3.08949	-3.65041	-3.65041	-2.32651	-3.65041	-2.46293	-3.65041	-3.65041	-1.84231	-3.65041	-3.65041	-1.29477	0.385558	-0.338887	-3.65041
Alad	4.86364	4.63828	4.63154	4.79744	4.93184	4.70775	5.14868	5.23374	5.2124	5.03474	4.94738	4.96585	4.19869	4.36032	4.03044	3.43178	4.12833	4.10719
Alas1	5.1654	5.17507	5.29004	5.30137	5.17682	5.22509	5.29997	5.32269	5.28221	5.30625	5.38394	5.34073	5.16238	4.63648	4.96072	5.05559	4.87088	4.714
Alas2	-1.20885	-0.982171	-0.754426	-1.38687	-2.17934	-0.864431	-2.7923	-1.68951	-2.46293	-1.04141	-2.68906	-0.813523	-0.558353	-3.65041	-2.20897	-0.313796	0.989464	-3.65041
Alcam	1.55713	1.24177	1.97388	1.54496	3.15908	2.1718	1.62715	1.63392	1.83702	1.71753	1.1808	1.85199	1.2001	0.522142	1.51512	1.30879	1.7872	0.522853
Aldh16a1	4.28491	4.40339	4.49019	4.2961	4.46741	4.37973	4.8103	5.06651	5.10873	4.98175	4.87116	4.89847	3.83111	3.86204	3.40624	3.78041	3.449	3.30109
Aldh18a1	5.07915	5.01013	4.92813	4.94512	4.61036	4.96673	5.13971	5.20834	5.29086	5.27314	5.21523	5.14498	4.57793	4.90674	4.3977	4.51285	4.49247	4.0138
Aldh1a1	2.85152	3.71746	2.99057	0.56548	4.32585	4.56072	0.991908	0.51924	0.177535	3.77525	2.57603	3.09338	-1.6465	-3.65041	-0.0814637	-3.65041	-3.65041	-3.65041
Aldh1a2	4.09931	3.87826	4.13849	4.3209	4.60618	4.28182	3.8527	3.70479	3.59514	3.7791	3.71464	3.82792	3.84862	4.57166	4.05041	3.80364	3.89591	3.90247
Aldh1a3	2.92115	2.84259	3.05879	2.53836	2.47401	3.0784	2.93577	3.28162	2.89836	2.75047	2.81048	2.81105	3.77914	2.76507	3.40686	3.07501	3.48817	1.86856
Aldh1b1	0.236079	0.41024	0.490838	-0.806885	0.306822	1.1069	0.61898	0.489954	0.844507	0.803323	0.311755	1.07277	-0.219423	-3.09152	0.819675	-1.08939	-0.944972	-1.75252
Aldh1l1	1.16138	1.87778	1.75374	1.27857	0.963277	1.66509	1.4675	1.14455	0.771865	1.8551	1.31806	0.754898	-0.323796	0.083104	0.23002	1.43316	0.935193	0.151958
Aldh1l2	-0.968453	-1.77138	-1.24559	-1.70508	-0.557497	-2.08204	-1.56273	-0.741727	-1.14342	-0.625183	-0.315201	-2.18802	-0.558353	-1.89952	1.12099	0.55939	-1.73919	-3.65041
Aldh2	4.59668	4.57181	4.53426	4.61608	4.37549	4.63531	4.68795	4.91802	4.88676	5.25484	5.10445	5.07475	3.57151	3.22477	3.38186	3.53116	3.62302	3.568
Aldh3a2	4.10885	4.09953	4.15936	4.24231	4.2922	4.1414	3.88781	3.77294	3.90017	3.88205	3.80305	3.95366	4.22668	4.39691	3.86486	4.03176	4.18466	3.77096
Aldh3b1	-1.66678	-2.54753	-1.57257	-2.37205	-1.61426	-1.34842	-1.86885	-2.35968	-1.51069	-2.31113	-0.549926	-1.1074	-0.0309192	-0.263231	1.8754	1.72846	1.55501	1.80722
Aldh3b2	-3.65041	-3.65041	-2.59805	-3.65041	-3.65041	-3.65041	-3.65041	-3.65041	-3.65041	-3.65041	-3.65041	-3.65041	0.763941	1.05424	2.76131	3.33545	2.19544	2.62286
Aldh3b3	-3.65041	-3.65041	-3.65041	-3.65041	-3.65041	-3.65041	-3.65041	-3.65041	-3.65041	-3.65041	-3.65041	-3.65041	-3.65041	-3.65041	-2.94627	-0.18019	-0.352324	-3.65041
Aldh4a1	3.06264	3.12901	2.97574	2.97739	3.31606	2.98022	2.68229	2.53226	2.83806	3.02772	2.96689	2.6787	2.48246	2.54243	2.41704	2.49685	3.16054	3.16101
Aldh5a1	-0.146803	0.223319	-0.235561	-0.257519	1.13304	0.785196	-0.279472	-0.0837322	-1.0392	-0.0390301	0.320495	-0.0687221	0.420574	0.82798	0.337942	-2.01789	1.51856	0.725906
Aldh6a1	1.70329	1.93638	2.05034	1.63561	2.57826	2.60107	2.16364	2.21098	2.21969	2.53786	2.22672	2.48693	2.0129	1.958	2.19822	1.86722	1.90483	2.31191
Aldh7a1	6.27319	6.15744	6.08997	6.06674	5.80842	6.10593	6.29975	6.35017	6.20443	6.26253	6.19835	6.30132	5.53637	5.74879	5.085	5.61088	5.54757	4.92464
Aldh8a1	-3.65041	-3.65041	-3.65041	-3.65041	-2.73497	-3.07372	-3.65041	-2.86527	-3.65041	-2.63594	-3.0911	-2.18802	0.0548351	-1.70975	-3.65041	0.256823	-1.16443	0.220779
Aldh9a1	5.65531	5.47391	5.5383	5.66543	5.76695	5.38252	5.37388	5.31447	5.30578	5.36843	5.33612	5.29252	5.25112	5.63417	5.13186	4.7315	5.29116	5.17495
Aldoa	6.69684	6.67072	6.65635	6.51122	6.3927	6.5802	7.2927	7.65403	7.56901	7.33366	7.35607	7.45661	6.382	6.2028	6.8563	6.605	6.7216	6.61505
Aldoart1	-3.65041	-3.65041	-3.03033	-3.65041	-3.65041	-3.65041	-3.65041	-3.20507	-3.65041	-3.65041	-3.65041	-3.65041	5.46788	4.21305	5.85508	5.33807	5.97393	6.26563
Aldoart2	-3.0727	-2.83056	-3.65041	-3.65041	-3.12127	-3.65041	-3.15847	-3.65041	-2.76156	-3.65041	-2.68906	-3.65041	3.57876	4.48935	5.79124	5.98186	5.47311	5.99329
Aldoc	5.01445	5.17117	4.96987	4.93462	4.23388	4.75932	5.08423	4.98003	4.77325	5.17274	5.0462	5.33687	4.51465	5.12962	4.64098	4.90799	4.89916	4.71699
Alg1	4.45966	4.39756	4.20021	4.31268	4.45656	4.49213	4.58278	4.63834	4.69438	4.5582	4.62925	4.34145	3.8189	3.82876	3.79035	3.44588	4.01843	4.27436
Alg10b	4.77673	4.90533	5.10865	4.98376	5.35156	4.88674	5.06539	4.92761	5.25415	4.80666	5.00782	5.14356	5.18562	4.84188	4.6567	5.36116	5.52478	5.31138
Alg11	3.83445	3.62892	3.9183	3.9045	3.94984	3.73755	3.85915	3.71147	3.80116	3.69471	3.89625	3.7577	3.71341	3.57694	4.25596	3.99287	4.13376	3.88984
Alg12	2.86012	2.8681	2.70856	3.02512	2.73939	2.98308	3.00136	2.79904	2.65209	2.74436	2.81898	2.96429	2.89777	3.20722	3.38752	3.00959	2.46044	0.817632
Alg13	4.72909	4.9731	5.0564	4.80956	5.63765	5.00574	5.21943	5.27799	5.35741	5.16132	5.34257	5.37831	5.26265	4.98949	5.00887	5.29364	5.32612	5.6428
Alg14	2.21074	2.02546	2.66059	2.42703	2.32755	2.10644	2.67573	2.79425	2.80693	2.52773	2.75594	2.4216	1.92454	1.79525	3.0173	2.5555	0.324745	0.945136
Alg2	4.41791	4.15758	4.17652	4.18643	4.55296	4.03555	4.42852	4.70835	4.39493	4.61908	4.53828	4.54374	3.36878	3.63673	3.64558	3.55257	3.52538	3.32395
Alg3	2.59479	2.09913	2.38158	2.48767	2.73175	2.20769	2.675	2.85811	2.95309	2.40142	2.84193	2.5725	2.51459	2.69713	2.39846	2.14696	1.65913	2.41976
Alg5	2.87331	2.63535	2.54906	3.04774	2.81946	2.78434	2.98554	2.96307	2.93529	2.70086	3.11365	2.98418	2.31007	3.08442	2.48317	3.02943	2.65768	1.91499
Alg6	2.19846	2.65083	2.16345	2.73651	2.80496	2.49389	2.78746	2.45631	2.65209	2.34371	2.73974	2.52071	2.72673	2.17816	1.02737	1.82244	2.51696	2.48976
Alg8	2.40486	2.90906	2.30874	2.79275	2.71634	2.84846	3.14021	2.81684	2.82845	2.72676	2.93736	2.74112	2.85059	2.28241	2.50533	2.89638	2.7232	1.61607
Alg9	3.71587	3.78599	3.87396	3.8728	3.7868	3.96499	3.92548	3.88714	3.47268	3.79185	3.72331	3.63033	4.00169	3.35797	2.95934	4.29247	3.24216	3.58768
Alk	-1.49747	-0.982171	-0.754426	-2.68663	-2.73497	-3.65041	-2.25792	-2.35968	-1.3776	-3.05578	-2.37498	-1.34292	0.0548351	-1.54207	-3.65041	-1.08939	0.484441	-3.65041
Alkbh1	4.54041	4.68226	4.67904	4.80273	4.57128	4.45141	4.43241	4.60082	4.70717	4.27278	4.31347	4.58949	4.57031	5.06597	4.565	4.68347	4.84867	4.28484
Alkbh2	3.99316	3.85414	3.47408	3.64737	3.37121	3.51462	4.085	4.32255	4.11616	3.97069	4.13576	4.15956	2.9986	2.7865	3.31013	3.26524	3.49756	2.48976
Alkbh3	2.91291	2.92651	3.06617	3.1028	3.09081	2.8406	2.88674	3.13798	2.99665	2.88587	2.80192	2.97652	3.39285	2.68788	3.2705	3.67098	3.24216	3.27544
Alkbh3os1	-3.65041	-3.65041	-3.65041	-3.65041	-3.65041	-3.65041	-3.65041	-3.65041	-3.65041	-3.65041	-2.37498	-2.74135	-3.65041	-3.65041	-0.902003	0.187874	0.628209	-3.65041
Alkbh4	2.47778	2.59007	2.72732	2.8385	2.81368	2.45426	2.78814	2.75663	2.91467	2.82017	2.58603	2.7328	2.80058	2.237	3.20716	2.85139	3.4295	1.59029
Alkbh5	7.43092	7.363	7.43969	7.4008	7.5429	7.35143	7.56666	7.72304	7.68285	7.54764	7.58969	7.58441	6.939	6.70413	6.69675	6.7562	7.03279	6.50966
Alkbh6	2.89781	2.99923	2.4039	2.66944	2.75456	2.62781	2.74073	2.99365	3.09727	2.89377	3.01345	3.20204	2.05513	0.973496	2.83592	1.91066	2.11472	2.31191
Alkbh7	2.08302	2.18863	1.95809	2.18437	1.73372	1.81703	2.034	1.97773	2.15525	2.15923	2.75594	2.36497	0.602449	1.76358	2.04741	1.86722	1.59055	1.73847
Alkbh8	2.76677	2.79398	2.84533	2.65217	2.93246	2.74277	2.60075	2.64615	2.69881	2.65414	2.36094	2.38442	2.20708	2.76427	1.29979	2.75934	2.83116	3.30664
Allc	-2.6613	-3.18301	-3.03033	-3.65041	-2.73497	-3.65041	-2.05031	-1.33487	-2.0046	-2.31113	-1.89859	-3.65041	3.71671	4.71309	5.98422	6.22494	5.8393	6.57683
Alms1	7.81112	7.90596	7.90656	7.86964	7.97907	7.84402	7.96597	7.91655	7.99172	7.7571	7.79993	7.80743	8.60457	8.38072	8.72168	8.5929	8.63909	8.91351
Alox12	-1.12008	-0.750056	-1.97165	-0.26406	-1.45227	-0.949102	-0.0446755	-0.880167	-1.3524	-0.232015	-1.87844	-0.1958	-3.65041	-1.70975	-3.65041	-3.65041	-3.65041	-3.65041
Alox12b	1.61369	1.63048	1.63958	2.08492	1.80829	1.89501	1.12629	1.18166	0.908461	1.33166	0.134753	1.2966	1.64928	1.2948	0.43835	-3.65041	1.04177	-1.30274
Alox8	-1.04811	-0.757469	-1.57257	-1.12632	-0.143528	-0.874747	-0.506015	-0.769789	-0.324456	-0.625183	-0.782823	-0.769877	-3.65041	-1.70975	1.6236	-3.65041	-1.73919	-1.30274
Aloxe3	0.236079	0.931938	0.76943	0.925964	0.186732	0.326194	-0.223893	0.121161	0.340965	0.42105	0.134753	-0.236808	1.97161	0.0308525	2.07886	-0.52907	-1.73919	-2.04397
Alpk1	1.92809	1.63048	1.55812	1.27857	1.6567	1.89955	1.58108	1.30449	1.30085	1.60644	1.1784	1.54146	1.92226	1.74586	2.01689	1.99582	1.43889	1.93561
Alpk2	-3.65041	-3.65041	-1.57257	-2.0905	-0.303946	-3.07372	-2.19244	-1.08526	0.0929039	-0.808041	-0.859725	-0.406894	-0.571145	-3.09152	-3.65041	-1.4802	-3.65041	2.26868
Alpk3	-0.348149	-0.474919	-0.471792	-0.394341	-0.285215	-0.765134	-0.020798	-0.609065	-0.00680129	-1.3054	0.363421	-1.47687	0.420574	-1.70975	-2.20897	-2.38716	-0.586318	1.30348
Alpl	4.58518	4.45461	4.36794	4.3345	3.97369	4.07628	4.60578	4.82727	4.45884	4.4172	4.55689	4.61934	4.00223	4.42501	3.77122	3.88212	3.57946	4.58941
Als2	7.75373	7.71681	7.69224	7.49121	7.4366	7.6821	7.65659	7.72001	7.72517	7.73952	7.73534	7.7568	7.4191	7.71862	7.51413	7.62725	7.56875	7.60729
Als2cl	3.64934	3.74625	3.73817	3.86795	3.81853	3.65435	3.37386	3.37308	3.26494	3.65339	3.52867	3.51729	3.57223	3.37746	3.46097	3.23137	2.55345	3.54134
Als2cr11	1.82006	1.87778	2.00495	1.92158	2.48132	2.06656	2.50531	2.70085	2.7858	2.17229	2.63853	2.67159	2.80182	2.84063	4.27747	4.42195	4.18466	4.19533
Als2cr12	-1.63129	-1.49872	-1.00374	0.485846	1.2681	-0.672234	-2.17126	-3.20507	-3.65041	-3.65041	-3.65041	-1.97479	-0.436313	-0.329992	2.88567	2.05316	2.38147	2.5985
Alx1	-1.85864	-1.62862	-2.26587	-0.545513	-0.285215	-0.864431	-3.65041	-3.20507	-3.65041	-3.65041	-2.68906	-3.65041	1.377	0.229381	1.9316	1.67907	1.48117	0.861398
Alx4	-0.0854819	-0.00906394	0.808701	-0.797365	-0.279025	-0.350935	-0.337277	-0.475977	-0.798939	-0.625183	-1.25477	-1.78906	0.35447	-0.199422	1.09046	1.99784	0.324745	-2.90052
Alyref	6.55535	6.43247	6.58559	6.55014	6.82101	6.52186	7.03631	7.17184	7.22631	7.05039	6.93923	6.96745	6.22635	6.16708	5.99662	5.92474	5.97326	6.20884
Alyref2	0.75501	0.760899	-0.0326237	0.834012	0.50636	0.535435	0.277627	0.759064	0.620971	-0.625183	0.485029	-1.22036	-0.122095	-1.70975	0.486049	0.664635	1.27813	-0.960363
Amacr	3.20442	3.1953	3.08083	3.01839	2.71634	3.11926	3.19222	3.29481	3.26951	3.06461	3.0793	3.14047	2.78936	2.99178	3.04941	3.13393	2.80113	2.12706
Ambra1	6.21656	6.13634	6.04564	6.12328	5.97063	6.05597	6.09904	6.24454	6.23261	6.31573	6.2756	6.17999	6.19281	6.19925	6.07475	6.1679	6.01637	5.85143
Amd1	5.05195	5.07429	5.3343	5.38292	5.70663	5.4165	5.65074	5.45512	5.75194	5.43483	5.22034	5.30201	4.90245	4.81722	4.76918	5.3744	5.008	5.10089
Amd2	0.0788921	-0.346406	0.418829	1.20943	0.963277	0.622359	0.744103	0.310625	0.559222	0.42105	1.45137	-0.447577	0.227269	-1.24292	-0.573907	-0.264647	0.832044	1.88561
Amdhd2	3.95719	3.90785	3.83169	4.23101	3.54264	3.71709	4.02318	4.17372	4.14133	4.15994	4.24596	4.15673	3.78103	3.32581	3.13419	2.66102	3.84531	3.30822
Amd-ps3	-0.134328	-0.48719	0.664357	-3.65041	1.51961	-1.16001	0.177985	-1.95348	1.03562	-3.65041	-0.920217	-2.30775	-3.65041	-3.65041	-3.65041	-3.65041	-0.924756	-2.25206
Amer1	3.42854	3.33689	3.0454	2.91215	2.8857	2.99091	3.32206	3.34882	3.32036	3.23861	3.47047	3.31984	2.58403	2.93463	3.14982	2.51526	2.62548	3.31138
Amer2	-0.762454	-0.53098	-1.99605	-1.89508	-0.981126	-1.49987	-1.43102	-0.958742	-0.724293	-1.45804	-1.39083	-1.78906	-1.18672	0.768593	3.1907	2.31804	2.01359	2.99116
Amfr	3.97169	4.01505	4.55802	4.3769	5.49628	4.61241	3.94045	3.88151	3.94247	4.03646	4.08857	3.95691	4.4087	4.61667	4.38831	3.68356	4.46878	4.28645
Amh	-1.66678	-2.31102	-0.653935	-0.714399	0.0943888	-0.0295098	-1.43102	-0.673872	-0.942001	1.18472	-0.549926	1.45213	-0.558353	-3.65041	-3.65041	-3.65041	-3.65041	-0.815494
Amhr2	1.47809	0.977299	1.35846	-1.38687	2.46297	2.49489	-1.70769	-1.83017	-1.65731	1.52529	0.632704	0.976101	-0.323796	-3.65041	-0.227697	0.0392277	-0.0600335	-3.65041
Amigo1	3.72873	3.93684	3.67049	4.0045	4.00889	4.03899	3.83645	3.74563	3.64292	3.95944	3.92984	4.01702	3.76839	3.64978	3.10393	2.96907	2.67434	3.14073
Amigo2	3.3447	3.46979	3.25248	3.20166	3.01601	3.46946	3.40549	3.65619	3.40038	3.27901	3.52442	3.5465	2.98774	3.08442	3.34935	3.5457	2.78588	2.81317
Amigo3	-0.499908	-1.07173	-0.471792	-0.627486	0.767858	-0.0883197	0.352665	-0.812932	-0.607872	-0.232015	-1.39083	-0.427092	-1.6465	-3.65041	-1.93324	-2.88472	0.935193	-3.65041
Ammecr1	4.58282	4.53113	4.65671	4.81752	4.98778	4.6262	4.96389	4.76598	5.06541	4.78216	4.74577	4.69546	4.44846	4.59659	4.45275	4.8196	4.64818	5.1084
Ammecr1l	5.62008	5.54343	5.45931	5.58798	5.36891	5.52911	5.40396	5.34443	5.47703	5.46181	5.42112	5.24145	5.45018	5.47462	5.29306	5.06283	5.36204	5.25712
Amn	-1.85864	-2.31102	-0.754426	-0.545513	-0.715699	-0.584956	-1.56273	-1.68951	-0.765285	-0.625183	-1.01599	-1.78906	-3.65041	-3.65041	-3.65041	-1.08939	-1.73919	1.09931
Amn1	4.22777	4.26552	4.40976	4.22985	4.24654	4.4209	4.01309	4.18107	4.26125	4.06264	4.20436	4.39492	5.29164	4.90202	5.33257	5.43553	4.82648	5.59758
Amot	6.97384	6.98229	6.65274	6.48153	6.16399	6.7727	6.98232	7.12709	7.00759	6.9243	7.04684	7.14004	6.08738	6.44696	6.44512	6.72901	6.65946	6.58901
Amotl1	4.69695	4.69487	4.39605	4.94441	4.14546	4.25428	4.41895	4.22706	4.18959	4.73563	4.48193	4.00419	4.28196	4.29979	4.62642	3.87884	4.64184	4.20471
Amotl2	4.65197	4.60489	4.55251	4.42344	3.99619	4.51478	3.9313	3.9479	3.74132	4.24245	4.02649	4.0961	4.81483	4.80132	4.11631	3.73883	3.95097	4.3377
Ampd2	6.23538	6.27387	6.20474	6.2363	5.9633	6.14722	6.34519	6.47031	6.45246	6.52429	6.40701	6.47526	5.37507	5.8016	5.26086	5.19827	5.46618	4.74091
Ampd3	-2.07999	-0.602597	0.576073	-0.324309	-0.634431	0.0269963	-0.743278	-0.430472	-0.850939	-0.925568	-0.472391	0.174088	-0.0309192	-1.25584	-2.99783	-1.4802	-2.14408	-3.65041
Amph	-0.86178	-0.67094	-0.862444	-1.25072	-0.285215	-0.672234	-0.279472	-0.128449	-0.607872	-1.04141	-0.631865	-0.178576	-0.219423	-3.09152	0.389019	-3.65041	0.484441	3.01073
Amt	0.538364	0.729429	0.376686	0.735797	0.230778	0.503929	0.0303815	-0.0403595	-0.162369	-0.0942644	-0.0166354	-0.813523	1.23726	1.76838	-1.98433	1.02632	1.14101	-0.563228
Amy1	-0.348149	0.271458	-0.653935	0.235267	-0.224479	-0.584956	0.62807	-0.22227	-0.146035	-1.14129	0.766657	0.381859	1.23726	2.51607	-0.0814637	1.88911	0.414756	1.33486
Amz1	0.373449	0.861103	0.656551	0.867315	-0.285215	0.6834	-0.170377	0.195609	-0.162369	-0.384321	-0.0221499	0.56344	1.56411	-2.37576	2.34772	-1.08939	-0.174717	0.903874
Amz2	4.54236	4.58671	4.63949	4.80586	4.28413	4.56335	4.69319	4.4796	4.5691	4.45536	4.70796	4.76759	6.11572	5.88619	7.07585	6.90304	6.60194	7.64944
Anapc1	8.16075	8.18659	8.23767	8.16748	8.02071	8.21874	8.27059	8.22141	8.28324	8.12041	8.18506	8.25326	8.07592	8.25355	7.89917	8.11457	8.069	7.97716
Anapc10	3.11517	2.93803	3.19234	3.23625	3.44739	2.8406	3.39221	3.22543	3.40038	3.24171	3.11114	3.30716	3.44222	3.53723	2.86327	3.9451	2.9316	2.2474
Anapc11	5.34443	5.32297	5.2239	5.29582	4.97635	5.14948	5.41812	5.44705	5.32409	5.32099	5.36717	5.51273	4.99593	5.04324	4.95671	5.1027	5.196	4.50225
Anapc13	5.47585	5.26539	5.06472	5.23144	5.10749	5.01799	5.32639	5.70137	5.5341	5.52808	5.57913	5.5292	4.66198	4.96272	4.82612	4.34369	4.49716	4.95248
Anapc15	5.84108	5.86788	5.7296	5.72734	5.53742	5.56533	6.22115	6.30837	6.22929	6.07454	6.04438	6.18699	5.108	5.34018	4.8962	5.15354	5.32057	5.55573
Anapc16	4.07602	3.98455	4.21324	4.3168	4.17845	4.09985	3.89442	3.85304	3.88435	3.78463	4.01004	4.13709	4.36572	4.45383	4.51759	4.25925	3.9448	4.45697
Anapc2	7.46023	7.39019	7.21936	7.23807	7.14143	7.20234	7.4173	7.48875	7.34451	7.44584	7.43271	7.50068	6.74577	7.02271	6.6862	6.82799	6.79038	6.45089
Anapc4	6.85673	6.84293	6.85008	6.88078	7.00156	6.8394	7.22852	7.08939	7.08167	7.01454	6.97907	7.06068	6.7855	6.69885	6.38498	6.74717	6.50164	6.63567
Anapc5	7.19894	7.19305	7.28294	7.29234	7.48874	7.14876	7.47847	7.51557	7.5144	7.35744	7.40412	7.45514	6.98089	6.83459	6.66873	6.59313	6.80644	6.46957
Anapc7	5.24663	5.25299	5.11044	5.08712	5.22539	5.01834	5.0812	5.27413	5.27692	5.21105	5.12143	5.09097	5.16455	5.16853	5.07431	4.6409	5.14311	5.40511
Angel1	4.83359	4.85321	4.82068	4.95589	4.91878	4.86191	5.1197	5.19819	5.25287	5.25484	5.22413	5.13927	5.04914	4.90474	5.14677	4.90262	5.17273	4.94028
Angel2	5.42276	5.48053	5.51959	5.60703	5.69861	5.57697	5.70482	5.54196	5.59833	5.56902	5.62945	5.77186	5.93288	5.55	5.6363	5.81385	5.99016	5.44844
Angpt1	0.0298542	-0.133736	-0.471792	-0.545513	-1.20927	0.0813724	-1.56273	-2.16079	-1.3776	-1.04141	-1.25477	-1.22036	1.377	1.97192	1.03701	1.40306	-2.70898	-0.563228
Angpt2	-1.49747	-0.897846	-1.46647	0.0419884	-1.09613	-0.663265	-1.75418	-0.741727	-0.399914	0.263983	0.701234	0.528907	-2.32536	-1.39187	-2.99783	-1.50282	0.398803	-3.65041
Angptl2	-0.0266615	-1.07173	1.09235	-1.53722	0.394631	1.87974	-1.70769	0.30054	-0.399914	2.2495	1.40281	0.597167	-0.838592	-2.6897	0.961409	-1.4802	-1.42338	1.17062
Angptl4	2.46758	2.64732	2.6508	2.5718	2.31635	2.42302	2.69027	3.02512	2.91467	2.84485	2.68157	2.66366	2.57099	1.87151	-0.573907	0.762721	1.65913	-1.51017
Angptl6	2.19846	2.32647	2.2451	2.32176	1.94677	2.13242	1.72924	1.91301	1.29488	1.8696	1.50219	1.998	2.30308	1.55741	-0.78415	0.256823	0.237739	1.76175
Ank	3.46743	3.24251	3.27177	2.64346	2.80642	3.56319	2.92965	2.97369	2.53878	2.66342	3.11742	3.03367	3.74278	3.58784	4.22572	3.76865	2.88941	3.00098
Ank1	2.30535	2.24536	2.02024	1.93592	1.94545	2.03797	3.23747	3.74625	3.31496	3.34452	3.51017	3.8208	-0.323796	0.31926	0.532222	-0.52907	1.27813	-2.90052
Ank2	1.66633	1.32308	1.77553	2.0694	2.85859	2.07194	1.08727	0.98578	0.841779	1.6463	1.78553	1.52579	2.34112	3.07154	4.05556	4.49405	4.04814	4.50156
Ank3	4.16765	4.31428	3.77739	4.21934	3.62292	4.02691	3.80673	3.46249	3.49888	3.88205	3.43166	3.46664	4.19916	3.63716	3.54219	3.92459	4.05706	3.87604
Ankar	-1.85864	-1.92984	-1.39984	-1.12632	-0.801819	-1.34842	-3.15847	-2.35968	-2.0046	-3.65041	-3.0911	-3.65041	0.712094	1.76358	2.87227	2.60922	2.16274	1.76175
Ankdd1a	-0.582226	-0.00906394	-1.76882	-0.394341	-1.46627	-1.49987	-1.31034	-0.96684	-1.65731	-1.16738	-0.71874	-1.97479	-0.436313	0.631452	0.43835	1.82244	-1.42338	1.17062
Ankdd1b	-1.08365	-2.10788	-1.24559	-1.89508	-2.73497	-0.584956	0.0258031	-0.0837322	-0.607872	-1.82243	-0.137113	0.0333558	-2.84082	-1.54207	-3.65041	-2.38716	-3.65041	-3.65041
Ankef1	2.54718	2.89789	2.53848	2.86197	2.40648	2.78516	2.39426	2.28105	1.91693	2.33212	2.29484	2.39309	7.57167	7.22236	8.29452	7.81027	7.97269	8.56604
Ankfn1	-3.65041	-3.18301	-3.65041	-3.65041	-3.65041	-1.86085	-3.65041	-3.65041	-3.65041	-3.05578	-3.65041	-3.65041	0.483781	-3.65041	0.23002	-0.927632	-0.586318	1.59029
Ankfy1	6.89341	6.9396	6.82178	6.81475	6.89448	6.86984	6.94401	6.81854	6.95359	6.82441	6.92054	6.85968	6.90837	6.88251	6.55431	6.85388	6.7278	6.75635
Ankhd1	7.40237	7.34432	7.45485	7.52851	7.85552	7.38083	7.71488	7.74057	7.80741	7.59905	7.51029	7.54153	7.44305	7.39086	7.1536	7.41429	7.58982	7.49147
Ankib1	5.95154	5.97875	6.0477	6.03487	6.37747	6.05087	5.8149	5.81303	5.95337	5.81734	5.97722	5.7599	6.27003	6.33675	5.87088	6.20119	6.02452	6.40088
Ankle1	1.4285	1.48731	1.94212	1.1368	2.62275	2.12338	1.8377	2.25778	2.06809	2.06433	2.20683	1.98659	0.103943	0.77178	0.707447	-2.01789	0.878801	1.95392
Ankle2	5.88999	5.83891	5.80977	5.79616	6.12229	5.89166	6.01931	6.12634	6.08907	6.02212	5.94101	5.87031	6.025	5.613	6.23862	5.76956	5.79447	5.16385
Ankmy1	-0.762454	-2.54753	-0.862444	0.0366755	-0.285215	-1.34842	-2.50051	-0.812932	-0.850939	-2.04619	-1.01599	-0.813523	0.658313	0.444378	0.856435	0.44586	2.01359	1.87284
Ankmy2	1.90712	2.23792	2.34805	1.9259	2.09831	2.06521	2.56649	2.11642	2.26925	2.29678	2.50688	2.35417	3.01367	2.58654	3.62175	3.40697	2.676	2.24905
Ankra2	2.6776	2.54559	2.305	2.60718	2.70858	2.62872	2.39515	2.14676	2.05285	2.59814	2.29484	2.13059	3.12293	3.37379	3.87295	2.97829	3.46919	4.21655
Ankrd10	5.57687	5.76234	5.78559	5.87809	5.96811	5.8252	5.83204	5.83976	5.92563	5.82243	5.72348	5.87083	5.658	5.4274	5.82037	5.66102	5.35431	5.66009
Ankrd11	9.02946	8.98063	8.82256	8.97967	8.7355	8.70698	8.84532	8.90495	8.8753	8.74079	8.72087	8.70651	8.80465	9.01213	8.44109	8.6338	8.61372	8.48964
Ankrd12	7.40991	7.37838	7.36714	7.55322	7.39044	7.37754	7.29807	7.02863	7.12693	6.93583	7.04483	6.97512	8.10994	8.12404	7.78311	8.1051	7.92039	8.21365
Ankrd13a	5.43131	5.40618	5.51568	5.37321	5.80751	5.69196	5.27015	5.48836	5.59914	5.55326	5.32666	5.47139	5.26085	5.23037	5.06942	5.14105	5.48047	4.96281
Ankrd13b	0.972458	0.952527	1.63958	1.34456	2.747	0.611314	0.738518	0.603689	1.23378	1.44362	1.1784	1.14523	-0.112713	0.631452	-0.306776	-0.650089	0.935193	0.772498
Ankrd13c	5.23074	5.14582	5.30495	5.46716	5.40468	5.39908	5.40473	5.31833	5.4907	5.29346	5.23212	5.35386	4.97408	4.98469	5.24396	5.08362	5.1335	4.60366
Ankrd13d	3.52312	3.5698	2.93518	2.96345	2.42556	3.25556	2.75463	2.95238	2.35972	2.81268	3.04015	2.67159	3.48146	3.93565	3.38752	3.42356	2.31926	3.26814
Ankrd16	3.6757	3.92357	3.8689	3.87615	3.92693	4.11622	3.99914	4.18929	3.93705	3.89393	3.8487	4.08396	4.14447	4.14032	4.40299	4.48402	4.21288	4.52963
Ankrd17	9.35654	9.34118	9.30128	9.35695	9.17321	9.3007	9.31486	9.26989	9.28051	9.21333	9.15352	9.13594	9.5126	9.58247	9.3134	9.48372	9.42159	9.29339
Ankrd23	1.28263	1.81795	0.404918	0.188123	1.32203	0.615005	1.62564	0.401503	2.13423	2.17229	1.79811	0.958044	0.0380872	-3.65041	0.337942	1.86943	-1.42338	0.817632
Ankrd24	3.49228	3.56201	3.48349	3.81229	3.59033	3.40642	2.97192	2.65607	2.70932	3.15225	3.11616	2.70446	3.69015	3.71457	2.62521	3.20544	3.21963	3.27624
Ankrd26	6.31714	6.328	6.12389	6.31041	6.13313	6.03632	6.35606	6.23574	6.02139	5.9108	5.95686	5.91337	6.28995	6.35479	6.06693	6.1282	6.3386	6.12144
Ankrd27	4.95877	5.06736	4.82221	4.96605	4.78281	4.88636	4.70845	5.02882	4.9656	4.89716	4.95249	4.85347	4.67896	4.77991	4.92331	4.68065	4.78833	4.42779
Ankrd28	5.51684	5.64276	5.64336	5.68403	5.65685	5.74029	5.6015	5.69135	5.64111	5.61016	5.60719	5.56703	5.9436	5.80199	6.07903	5.90272	5.87524	5.92623
Ankrd29	0.373449	-0.474919	-0.097149	0.0366755	-0.414942	-0.0883197	-0.223893	-0.375537	-0.535171	-1.16738	-0.472391	-0.569496	0.285192	-0.633022	1.15089	-0.0412639	-0.754529	0.349292
Ankrd31	6.29641	6.39221	6.2828	6.53367	6.49501	6.30407	6.42994	6.25279	6.34468	6.09603	6.12696	6.12397	7.02079	6.92951	7.11809	7.26339	7.03021	7.22591
Ankrd33b	-3.65041	-2.31102	-3.65041	-2.37205	-3.12127	-1.86085	-2.05031	-2.86527	-1.51069	-3.05578	-3.0911	-3.12543	0.712094	-0.551092	-3.65041	0.385558	-0.174717	-3.65041
Ankrd34a	-0.762454	-0.357627	-0.862444	-0.545513	-0.893409	-0.672234	-0.999124	-0.22227	-0.336761	-0.71853	-0.198223	-0.178576	-3.65041	0.82798	-0.675202	-2.01789	-3.65041	1.06228
Ankrd34b	2.84366	2.54559	2.41667	2.19633	2.21144	2.66478	2.70466	2.55294	2.44216	2.35521	2.55766	2.46791	1.08252	2.32642	2.56318	0.115465	-0.0600335	-1.75252
Ankrd35	-0.669527	-1.37955	0.0883653	-1.12632	-0.557497	-0.584956	-0.999124	-0.741727	-0.765285	-0.454861	-0.71874	-0.813523	-2.32536	-1.89952	0.703417	-3.65041	-0.944972	-1.75252
Ankrd36	-0.277865	0.0345074	1.14909	1.59823	1.98457	1.84873	-1.86885	-1.23369	-2.21564	-1.3054	-2.37498	-0.646342	4.44091	4.32279	5.42587	5.10551	5.25229	5.29751
Ankrd37	1.85176	1.73982	1.49386	1.86425	1.57192	1.64718	2.46361	2.06968	2.05167	1.56743	1.95929	2.13059	1.85453	1.42196	2.38594	0.762721	1.32109	0.220779
Ankrd39	2.38225	2.56057	2.29624	2.17231	2.09712	2.6816	2.40311	2.45858	2.77869	2.72676	2.37044	2.20903	2.91048	1.79368	2.80804	1.37231	1.65913	2.10901
Ankrd40	4.29619	4.15734	4.18027	4.36661	4.70512	4.42011	4.28239	4.24601	4.34284	4.19844	4.28556	4.24182	4.51465	4.32007	3.8467	4.38739	4.492	4.72885
Ankrd42	3.84748	4.00824	3.68448	3.78681	3.90297	3.89764	3.50259	3.427	3.36663	3.58227	3.24743	3.51905	5.17584	4.9912	5.80576	5.88459	5.70385	5.96599
Ankrd44	3.95719	4.08381	4.14513	4.09034	3.84959	4.09292	4.13581	3.90361	3.92647	3.81076	4.00327	3.7956	4.18021	3.95716	3.37491	3.53879	3.7305	3.37768
Ankrd45	3.22877	3.08565	3.25248	3.67327	3.11334	3.35272	3.1455	2.50177	3.00277	2.83749	2.95149	2.76357	3.71671	3.70084	3.4369	3.80364	3.25329	3.60065
Ankrd46	4.42373	4.37571	4.56508	4.25638	4.27311	4.46221	4.42352	4.44263	4.52047	4.33188	4.48071	4.51315	4.13465	4.47866	3.99749	4.66551	4.11436	4.24492
Ankrd49	3.40416	3.48911	3.65098	3.89095	3.87271	3.4453	3.94319	3.83277	3.64214	3.51209	3.53807	3.89691	3.66923	3.1286	3.83983	3.83779	4.60972	4.01283
Ankrd50	5.79332	5.74293	5.78659	5.69419	5.86716	5.6877	5.73283	5.83547	5.7421	5.76313	5.73282	5.69315	5.54603	5.92196	5.49744	5.47278	5.37739	5.1109
Ankrd52	4.87641	4.96158	4.94786	4.56395	5.08247	5.00416	5.0967	5.08768	4.9451	4.95006	5.10572	4.94013	5.33063	4.82663	4.95268	4.61125	5.19657	4.89046
Ankrd53	-2.07999	-2.83056	-3.65041	-3.65041	-3.12127	-2.08204	-3.65041	-3.65041	-3.13859	-3.05578	-2.37498	-2.43832	1.62145	1.85658	3.46097	3.87665	3.20823	3.93355
Ankrd54	4.50272	4.46301	4.27859	4.53786	4.49183	4.44339	4.39673	4.39247	4.19921	4.25478	4.24768	4.33946	4.36488	4.6089	4.37602	4.28671	4.19625	4.22997
Ankrd6	5.25258	5.25426	5.03718	4.92549	4.52692	5.12703	5.35587	5.09256	4.96246	5.06324	5.08999	4.92361	5.05175	5.12807	4.93754	4.66329	4.63972	4.77535
Ankrd60	-1.85864	-3.18301	-2.26587	-2.68663	-3.12127	-3.07372	-3.65041	-2.16079	-3.65041	-2.63594	-3.0911	-3.65041	4.40462	4.76399	6.2645	6.11781	5.74583	6.5899
Ankrd61	-1.20885	-1.49872	-0.653935	-1.89508	-1.61426	-1.49987	-1.43102	-3.20507	-0.850939	-1.3054	-1.54106	-1.97479	1.75555	2.07873	3.16382	3.05869	2.83116	3.52102
Ankrd63	0.65075	1.1849	0.0291387	-0.806885	0.186732	0.37054	0.491959	0.489954	0.133612	0.662324	0.523389	1.12225	-2.32536	-0.329992	0.856435	-2.01789	-0.944972	-1.51017
Ankrd66	-0.86178	-1.62862	-1.10626	-0.467948	-2.43057	-0.97107	-0.999124	-0.741727	-1.65731	-1.16738	-1.25477	-0.236808	-1.18672	-1.39187	-0.152728	-0.417421	-0.586318	-3.65041
Ankrd7	-3.0727	-3.65041	-3.03033	-3.65041	-1.33206	-3.65041	-3.65041	-3.65041	-3.65041	-3.05578	-3.65041	-3.65041	-1.18672	-1.70975	0.28499	0.714511	2.01359	1.56404
Ankrd9	1.32841	0.90871	1.09235	0.705985	1.22519	0.755405	1.03811	1.49342	1.33422	0.991931	0.701234	1.33708	1.04109	1.71473	1.15089	0.940903	1.81752	1.48231
Anks1	5.53599	5.61961	5.4337	5.62064	5.23759	5.48327	5.31997	5.19263	5.01334	5.42409	5.34552	5.25736	5.31551	5.47095	5.50325	5.24992	5.35198	5.15091
Anks1b	3.99281	4.13974	3.9755	3.9096	3.44365	4.00949	2.87151	2.74428	2.74552	3.05829	2.9648	3.16316	4.87766	4.48693	4.79545	4.79663	4.92723	4.41683
Anks3	4.30451	4.30719	4.12759	4.31543	4.48412	3.87165	3.95498	4.16957	4.01689	4.07903	4.1937	4.04417	4.26362	4.3497	4.48245	4.26804	4.15529	4.12481
Anks4b	-3.0727	-2.05213	-2.84162	-2.26321	-2.3505	-1.76179	-3.65041	-3.65041	-1.65731	-3.65041	-1.96077	-2.88296	-2.66598	-0.0854516	-0.87765	-0.417421	-3.65041	-3.65041
Anks6	2.24695	2.45229	2.59164	2.47594	3.29547	2.45426	1.97466	2.11833	2.14422	2.33096	2.10427	1.85199	2.73714	0.797029	0.532222	1.09948	2.9454	1.99575
Ankzf1	4.2196	4.08665	3.89069	4.16559	3.89717	4.1481	4.34828	4.2953	4.38794	4.2083	4.24854	4.30415	4.19822	4.40975	3.93957	3.82139	3.9448	3.90769
Anln	6.27348	6.28586	6.41028	6.34682	6.67292	6.48974	6.96228	6.84422	7.0074	6.72643	6.80379	6.92488	6.08751	5.58982	5.74788	5.77133	5.92116	6.24388
Ano1	2.41657	1.8167	2.45092	2.16014	3.37613	2.49489	1.14752	1.4621	1.33422	2.27272	2.08002	1.86589	2.21269	1.958	0.856435	0.385558	0.878801	0.522853
Ano10	4.8904	4.98217	4.93722	5.09896	4.95303	4.86559	4.73761	4.54851	4.40143	4.54545	4.68974	4.50184	5.27878	4.79526	5.01944	4.84305	4.90904	5.50834
Ano3	-1.66678	-0.67094	-0.979208	-0.324309	-1.09613	-0.864431	-0.594883	-1.33487	-2.0046	-0.925568	-0.811183	-1.34292	-0.436313	-1.70975	-0.47926	-1.4802	-2.70898	-0.815494
Ano4	0.136648	0.342517	0.534085	0.235267	0.355379	0.570075	-0.331391	0.266404	-1.3776	-0.446851	-0.0221499	0.128686	-0.323796	1.22675	0.576962	-1.08939	-0.944972	-3.65041
Ano5	-1.85864	-1.37955	-1.24559	-2.68663	-1.96544	-1.6691	-2.25792	-3.20507	-2.76156	-1.16738	-1.89859	-1.97479	-1.00218	-3.65041	-2.20897	0.44586	-0.0600335	1.27139
Ano6	3.32281	3.32334	3.42839	3.03114	3.19566	3.57081	2.64322	2.64549	2.27431	2.76347	2.70929	2.923	3.22172	2.54988	3.4823	3.28435	3.50596	3.63257
Ano8	1.37497	1.44918	0.732776	-0.257519	1.33015	0.880281	1.14752	1.14455	0.683235	1.88555	1.50219	0.381859	0.483781	0.559507	2.12479	-0.417421	0.758939	-2.90052
Ano9	-2.6613	-1.16722	-2.59805	-1.25072	-1.61426	-1.49987	-0.999124	-0.609065	-1.51069	-0.302541	-1.39083	-0.904989	-2.32536	-3.65041	-3.65041	0.385558	-2.70898	-3.65041
Anp32a	4.44518	4.09414	4.30972	4.53456	5.01606	4.39644	4.62312	4.93429	4.79474	4.83507	4.56104	4.83203	3.86058	3.45931	2.4244	2.57183	3.49756	3.95391
Anp32b	8.68325	8.57466	8.55687	8.55127	8.69783	8.48761	8.94307	9.1367	9.02313	8.8321	8.81885	8.88453	7.63661	7.83432	7.18193	7.20467	7.58976	7.30723
Anp32b-ps1	-0.36992	0.527717	-0.463262	-0.585917	0.347399	-0.267013	0.202534	0.53653	0.220161	-0.495594	0.0894475	0.346601	-0.901819	-3.65041	-3.65041	-1.72414	-1.16443	-2.90052
Anp32e	5.88799	5.57881	5.82628	6.08848	5.61747	5.8125	6.40976	6.30989	6.29251	6.36206	6.18644	6.33357	4.92369	5.29521	4.65956	4.39544	4.87413	4.88039
Anp32-ps	-1.01343	-0.415081	-0.0200579	-1.04522	-0.160496	-0.440042	-0.743278	-1.12096	-0.472731	-1.01749	-0.384536	-1.56364	-0.0309192	0.143406	-3.65041	1.05758	-0.754529	0.677758
Anpep	2.12253	2.14953	2.74583	3.14106	3.28506	2.75954	3.27653	3.29057	3.75588	3.27901	3.26055	2.89141	1.47359	1.48157	0.74322	1.09948	1.90483	-1.75252
Antxr1	3.00671	2.8066	3.11683	3.14106	2.95824	3.10621	2.24468	2.14676	1.80937	3.09716	2.78938	2.80023	3.04124	2.98493	2.06479	2.45492	2.69081	2.17986
Antxr2	0.654349	0.708061	1.30703	0.864319	0.936929	1.03432	0.560037	-0.307114	-0.108627	1.05816	0.670798	0.696973	2.9986	2.25988	3.44417	2.41173	2.49837	3.84367
Antxrl	-3.65041	-3.65041	-3.65041	-3.65041	-3.65041	-3.65041	-3.65041	-3.65041	-3.65041	-3.65041	-3.0911	-3.65041	3.09284	3.79392	5.19242	5.19168	4.99147	5.1084
Anxa1	-1.49747	-1.77138	-0.559991	-1.0118	-0.715699	-0.0295098	-3.15847	-1.98603	-2.46293	0.376602	-0.137113	-1.78906	-3.65041	-3.65041	0.337942	-3.65041	-3.65041	-3.65041
Anxa11	5.37216	5.17775	5.20646	5.50168	5.13557	5.26601	5.26434	5.29904	5.24811	5.06587	5.09206	5.07639	5.00188	4.94748	5.14082	4.76117	4.47307	5.14339
Anxa11-ps1	3.66771	3.42466	3.77107	4.02443	3.3514	3.37411	3.63625	3.35574	3.648	3.80197	3.72989	3.7476	3.50983	3.76662	2.98613	2.57048	2.62548	3.17929
Anxa2	2.90538	3.07526	3.13028	2.0325	3.171	3.72137	2.82813	3.10456	3.10866	3.50178	3.30527	3.1855	0.90455	0.182251	0.389019	0.44586	1.55501	2.76789
Anxa3	-0.422034	-0.643213	0.0291387	-0.855451	-0.401432	0.0813724	-0.823623	-1.05042	-1.25577	0.00251393	-0.262037	-0.646342	-1.39837	-2.37576	1.25644	0.809372	0.145146	1.09931
Anxa4	0.236079	-0.357627	0.656551	0.325172	1.30771	0.611314	-0.594883	0.266404	-0.00680129	0.624811	0.862538	-0.727512	-0.436313	-1.11968	1.26467	-1.54915	-0.754529	1.27139
Anxa5	0.788153	0.680897	0.446255	-0.324309	0.47007	1.18347	0.0258031	0.398354	-0.535171	1.8696	1.00219	1.43359	0.0548351	-3.09152	0.532222	0.385558	0.758939	0.576358
Anxa6	2.66873	2.49969	2.19208	2.07199	2.38715	2.69996	1.61348	1.69935	1.25444	3.05053	2.46216	2.32427	2.0129	2.51891	2.51801	2.11017	2.29791	1.30348
Anxa7	5.72863	5.72966	5.62598	5.69186	5.35169	5.66239	5.87857	5.89107	5.83074	5.85306	5.67223	5.92744	5.228	5.50247	5.53208	5.70332	5.63295	5.31748
Anxa9	-1.20885	0.196717	0.25272	-0.193685	-0.48446	-0.447722	-0.908707	-0.741727	-1.3776	-0.818338	-0.549926	-0.122604	-2.32536	-0.399993	-3.65041	-2.01789	-0.944972	-3.65041
Aoc2	1.53777	1.6697	1.85612	1.99053	1.92281	1.25382	1.85458	1.84871	1.8762	2.04884	1.83974	1.84779	1.47359	0.82798	-0.573907	1.81788	0.484441	-3.65041
Aoc3	0.534463	-0.259645	0.698972	0.401558	1.23171	1.43178	0.190312	0.741776	-0.465958	1.37298	1.67572	0.42005	-2.12345	-0.199422	1.31836	-2.88472	0.558115	-3.65041
Aox1	-0.669527	-0.474919	0.303591	-2.11394	0.0943888	0.6834	-1.70769	-1.05042	-1.82053	-0.232015	-0.71874	-0.813523	-0.558353	-1.70975	0.43835	0.256823	-0.586318	0.945136
Aox3	-1.85864	-2.31102	-1.10626	-1.89508	-2.17934	-3.65041	-3.15847	-2.16079	-2.76156	-2.04619	-2.68906	-3.65041	0.954494	-0.399993	0.961409	1.09572	1.90483	0.349292
Aox4	3.42959	3.57645	3.68496	3.55237	2.71634	3.60555	3.02565	2.38015	2.47861	2.6625	2.77196	2.82108	4.25775	4.32007	4.64309	4.48042	4.23607	3.81057
Ap1ar	6.4907	6.36041	6.32258	6.40885	6.44078	6.25538	6.62597	6.69221	6.72025	6.49334	6.53978	6.56486	5.60159	5.8531	5.62529	5.41551	5.82389	5.5539
Ap1b1	7.37789	7.39962	7.28412	7.21694	6.91377	7.16859	7.28254	7.33538	7.22889	7.35561	7.29016	7.32064	6.95958	7.36729	6.72963	7.07583	6.914	6.98375
Ap1g1	6.44986	6.51842	6.6323	6.44195	6.93273	6.59902	6.67536	6.70306	6.73796	6.54138	6.52396	6.54922	6.60263	6.61043	6.53857	6.72072	6.32943	6.47045
Ap1g2	1.89804	1.58725	1.59942	2.55239	1.13536	1.39146	1.08287	1.56538	0.518816	1.35476	1.57705	1.21206	1.08252	1.7795	2.77001	1.70398	1.23386	0.151958
Ap1m1	6.03338	5.96748	5.90344	5.91557	6.05658	5.75636	6.01354	6.01452	5.87734	6.00771	5.93569	6.05199	5.95284	6.13186	6.43064	6.18569	6.52354	6.44281
Ap1m2	1.72056	1.71325	1.77192	1.27857	1.33015	1.92505	2.97192	3.08069	2.58028	2.66342	2.81898	2.81464	1.53456	2.4707	1.05926	3.12474	2.40162	2.12706
Ap1s1	4.1889	4.00687	4.09222	4.09354	4.08915	3.9758	3.82661	4.18998	4.21694	4.45776	4.24596	4.14281	3.71671	4.46224	3.77122	3.01955	3.99209	4.36836
Ap1s2	2.08302	1.98161	2.35771	1.95012	3.05941	2.38028	1.61196	1.41769	1.64701	1.8696	1.71602	1.68951	1.34332	2.19013	1.5825	0.187874	1.14101	1.91499
Ap1s3	1.54554	1.48574	1.47178	1.95717	2.21912	1.95303	1.71224	1.60689	1.73782	1.31055	1.65859	1.39958	2.7603	2.08898	1.35991	1.78324	2.32349	2.0172
Ap2a1	7.11767	7.13615	7.15718	7.09644	6.94716	7.08913	7.12728	7.24706	7.14706	7.24908	7.18491	7.34407	6.90722	6.89018	6.89943	7.16149	7.21373	6.88649
Ap2a2	7.14031	7.13052	7.07949	7.09125	7.13311	7.05807	7.35336	7.4386	7.39626	7.3282	7.32757	7.43838	7.18313	7.12404	6.8922	7.08297	7.06371	6.99853
Ap2b1	6.5175	6.56327	6.60657	6.63872	6.70079	6.67254	6.54504	6.49631	6.4948	6.5008	6.51566	6.54323	6.97828	7.11705	7.43724	7.59703	7.41036	7.62826
Ap2m1	6.92313	6.77507	6.87089	6.77358	7.10876	6.89895	7.05462	7.21557	7.31925	7.20754	7.10397	7.14629	6.54276	6.69251	6.24834	6.04121	6.19197	6.32251
Ap2s1	4.24667	4.06318	4.20991	4.15306	4.01521	4.0007	4.25601	4.12002	4.13577	4.23935	4.09176	4.45455	4.03952	3.95681	2.99275	3.98222	4.05643	2.5972
Ap3b1	6.94198	6.93458	6.78829	6.83038	6.72606	6.70564	6.58823	6.742	6.52231	6.67929	6.62664	6.55835	6.41684	6.62697	6.38498	6.76939	6.77694	6.35081
Ap3b2	2.77092	2.19056	2.07982	1.97811	1.46534	2.18304	2.23876	2.33475	2.26111	2.13541	1.88611	2.44957	3.13282	2.95019	2.15461	3.08832	2.20922	1.64139
Ap3d1	7.09501	7.08588	6.9103	6.97493	7.22407	6.96849	6.94154	7.03184	6.94698	6.82798	6.79812	6.8695	7.0481	6.91251	7.02579	6.94282	6.88289	6.59566
Ap3m1	4.8486	4.72244	4.83588	5.10516	5.19138	5.00434	5.17296	5.00483	5.0899	5.08101	5.04009	5.05835	4.73459	4.85132	5.20868	4.95544	5.18121	4.9015
Ap3m2	3.94622	3.88987	3.82692	3.74017	3.67606	3.78829	3.48269	3.40481	3.31987	3.4704	3.29477	3.77401	3.76203	3.65021	4.15371	4.1992	4.08225	3.83327
Ap3s1	4.20095	4.08665	4.018	3.97355	4.343	4.07929	4.02318	4.13191	4.09627	4.04642	4.0097	4.02664	5.10423	4.69221	5.66352	5.17173	4.97172	6.08602
Ap3s2	5.03012	4.79106	4.88473	4.68584	4.70337	4.80042	4.79592	4.89545	5.03589	5.16622	5.02797	4.84314	4.97408	4.99496	4.95226	5.09848	4.94485	5.05569
Ap4b1	3.41694	3.5523	3.32692	3.48179	3.59792	3.50371	3.33229	3.31957	3.28465	3.16864	3.34222	3.42312	3.47525	3.66486	3.99791	4.19877	3.83867	2.91013
Ap4e1	4.32159	4.50872	4.41382	4.34394	4.59675	4.45245	4.54448	4.59722	4.63182	4.48078	4.53265	4.63282	4.78753	4.41994	4.83513	4.95284	4.98447	5.69195
Ap4m1	4.54236	4.37655	4.3499	4.62938	4.48252	4.55063	4.64288	4.72635	4.7372	4.82021	4.66099	4.70671	4.05	4.51192	4.1003	4.36921	4.75386	3.43674
Ap4s1	1.39447	1.33184	1.4266	1.25589	1.51961	1.47508	1.30696	1.47859	1.59936	1.46501	1.10694	1.48853	1.47359	0.31926	-1.70186	0.854561	1.27813	0.903874
Ap5b1	1.86735	2.12958	2.32114	2.72003	3.12506	2.3137	1.9507	2.23766	1.73782	2.05025	2.52022	2.29374	2.17488	2.17816	1.51512	1.24234	3.10139	2.73298
Ap5m1	3.56053	3.3185	3.62221	3.62497	3.7346	3.57224	3.76579	3.61913	3.6232	3.6636	3.59321	3.58609	3.63065	3.34733	3.91669	2.81642	3.13909	4.16072
Ap5s1	1.18646	1.26024	1.14909	1.48771	1.50175	1.20812	1.61196	1.18166	0.934295	0.83652	1.25106	0.693859	1.2001	1.94253	-0.573907	1.09948	-0.586318	1.02428
Ap5z1	3.69636	3.79108	3.75745	3.82776	3.55308	3.8005	3.65193	3.69263	3.35137	3.68927	3.77391	3.63602	3.35024	2.71462	3.5246	3.76629	3.06521	3.5818
Apaf1	4.03104	4.0944	4.46304	4.30966	4.80283	4.41853	4.18078	4.04724	4.21088	4.21399	4.32681	4.168	4.65822	4.29868	4.00938	4.56374	3.903	4.59558
Apba1	4.96621	4.559	5.00488	4.71107	5.27751	4.66899	4.7976	4.79919	4.74981	4.71369	4.71025	4.73198	4.49177	4.73367	4.5955	4.53036	4.39027	4.6374
Apba2	4.16607	4.13349	4.33775	4.89113	3.80111	4.08462	4.23905	3.8051	3.87505	4.01342	3.65542	3.85117	2.82397	3.60937	3.79414	3.19494	3.4157	2.56448
Apba3	4.76033	4.65635	4.57882	4.78026	4.61015	4.63258	4.54308	4.56142	4.6007	4.68641	4.46872	4.65019	4.5297	4.19209	4.50896	4.11396	3.9861	4.39466
Apbb1	5.82061	5.70972	5.53856	5.67839	5.41641	5.45408	5.15158	5.25271	5.32177	5.39095	5.35472	5.29779	5.83219	5.77683	4.92872	5.05801	5.46858	5.48072
Apbb1ip	1.00101	0.929632	1.17664	1.87024	1.68072	0.738584	0.540912	0.121161	0.0883091	0.83652	-0.137113	-0.297489	0.544335	1.10567	0.532222	0.612972	2.20922	1.80722
Apbb2	5.154	5.34043	5.27849	5.19106	4.99897	5.2015	5.27342	5.19966	5.18199	5.19818	5.2541	5.2526	5.30242	5.40063	4.70007	5.49043	4.76596	4.65958
Apc	8.32755	8.42675	8.26018	8.49619	8.28163	8.22907	8.52166	8.38387	8.4935	8.19678	8.19065	8.1873	8.57915	8.51754	8.17698	8.33556	8.28731	8.42872
Apc2	3.04903	3.21437	2.6508	3.24203	3.06002	2.69125	2.38535	2.21993	1.96785	2.33212	2.28482	1.90681	3.34344	3.667	3.23534	3.22278	2.84595	3.75944
Apcdd1	3.49278	3.01672	3.19301	3.09067	2.56111	2.90985	2.93577	2.9143	2.81391	2.77893	2.73974	2.78568	2.85059	3.51362	2.22658	2.16501	2.73913	0.903874
Apc-ps1	-0.146803	0.0768013	0.400251	-0.0175587	-1.33206	-0.280665	-0.908707	-0.375537	0.416223	-1.16738	-0.198223	-1.22036	-3.65041	-0.399993	-1.32738	1.30879	0.558115	1.51007
Apeh	3.04903	3.1265	3.21245	3.1656	4.00605	3.45871	2.87279	3.35695	3.03237	3.24851	3.27186	3.30257	1.7034	2.83226	2.30846	1.37231	1.81752	2.34312
Apex1	5.78923	5.65668	5.70131	5.79685	5.52299	5.7234	6.14667	6.23127	6.35541	6.12654	6.18637	6.20618	5.31768	5.32263	5.43349	4.82216	5.26638	4.52929
Apex2	3.59605	3.88393	3.77829	3.47149	3.5844	3.84006	3.80973	3.86393	3.88733	3.95226	3.96476	3.88603	4.24777	3.88688	3.58936	4.044	4.10455	3.57459
Aph1a	3.02142	2.83768	2.78305	3.1656	3.05329	2.98379	3.30562	3.06091	3.24392	3.36115	3.3651	3.60154	3.15241	2.99178	2.42318	1.2114	3.01246	2.10901
Aph1b	0.707291	0.429952	0.423436	0.258274	1.00446	-0.14338	-0.21303	0.227898	-0.25859	0.0141672	0.188261	0.183	-0.413097	0.987272	-0.306776	0.664635	0.406802	1.06228
Aph1c	-0.250683	-0.462751	-0.44635	0.104263	0.589902	0.495944	0.148806	-1.25337	-0.645645	0.403435	-0.342537	-1.86051	1.10682	1.22442	1.31836	-0.354357	0.0665401	0.903874
Api5	6.39316	6.50391	6.57903	6.51946	6.53404	6.5564	6.82487	6.79759	6.80224	6.57681	6.63925	6.70814	5.80569	5.95826	5.92066	6.10886	5.98249	5.88878
Apip	3.452	3.60599	3.66613	3.33207	3.43332	3.56796	3.83285	3.59217	3.58335	3.73136	3.73112	3.48927	3.1621	3.39978	2.63899	2.47097	2.13893	3.20159
Apitd1	3.27041	3.15194	3.145	3.27117	3.54743	2.97592	3.44931	3.60554	3.5453	3.49712	3.32712	3.23401	3.08267	3.53723	2.30846	3.15215	2.40162	2.70922
Aplf	5.57675	5.49911	5.30307	5.40821	5.06204	5.15662	5.48875	5.52374	5.46733	5.43605	5.40631	5.61566	4.88382	5.29202	4.5586	5.11645	5.0707	4.3842
Apln	0.18722	-0.197836	0.400251	1.08626	1.46534	0.647807	-0.223893	-0.271572	0.522226	0.662324	0.829241	-0.496538	-1.00218	-1.0171	0.486049	-0.417421	-3.65041	-3.65041
Aplnr	-3.65041	-2.10788	-2.59805	-3.08949	-3.65041	-3.65041	-3.65041	-2.59044	-3.65041	-3.65041	-3.0911	-3.65041	-3.65041	-3.65041	-0.390442	-3.65041	-0.174717	-3.65041
Aplp1	5.8785	5.81576	5.19539	5.14057	4.7341	5.26865	5.84176	6.17436	5.71637	5.79514	6.02621	5.99312	4.49561	5.36677	5.19601	5.41362	5.32822	5.12421
Aplp2	7.89426	7.85486	7.60633	7.50474	7.53279	7.64537	8.07776	8.16289	8.02666	8.07443	8.12165	8.1182	7.08501	7.38209	6.92664	6.9592	7.24404	7.11661
Apmap	3.1921	3.25638	3.53921	2.95714	3.58567	3.40109	3.09175	3.44352	3.47708	3.59251	3.40623	3.52037	3.7298	2.98493	3.44296	3.17013	2.62377	2.47575
Apoa1bp	4.2074	3.91369	4.35293	4.4032	4.5267	4.14172	4.31583	4.19452	4.3926	4.54319	4.38005	4.48865	3.86652	3.7461	3.0254	2.14696	3.79287	2.84622
Apoa2	0.136648	-0.474919	-1.76882	0.139386	-2.17934	-0.350935	-0.908707	-0.96684	-0.162369	-0.925568	-0.811183	-0.813523	-0.838592	-0.633022	-0.306776	0.854561	-2.70898	-3.65041
Apob	-1.85864	-1.62862	-1.57257	-0.394341	-2.73497	-1.08623	-1.19897	-1.44368	-1.65731	-1.62876	-0.909957	-1.78906	-2.84082	0.31926	0.28499	-0.782197	0.237739	0.817632
Apobec2	-2.07999	-1.26949	0.0291387	-3.08949	-1.77919	-2.34341	-1.56273	-2.59044	-2.76156	-1.16738	-1.70878	-3.12543	-3.65041	-0.812318	-0.152728	-3.65041	-1.16443	-3.65041
Apobec3	0.864723	1.16151	1.18481	0.954418	1.85547	1.38066	1.30696	0.966774	0.884809	1.12148	0.862538	0.724701	0.420574	-0.138317	1.77144	0.674749	1.17419	-0.451914
Apobec4	-3.65041	-3.65041	-3.65041	-2.68663	-2.73497	-3.07372	-3.65041	-3.20507	-3.65041	-3.65041	-3.65041	-3.65041	-0.838592	-1.13154	1.26467	0.762721	1.59055	2.19705
Apobr	-1.34595	-1.16722	-2.26587	-1.70508	-2.17934	-1.86085	-1.09559	-1.56137	-1.82053	-1.82243	-0.631865	-2.18802	0.35447	-0.199422	0.74322	-1.72414	-3.65041	0.467287
Apoc1	-1.49747	-1.16722	-0.653935	-1.12632	-0.801819	-0.97107	-1.86885	-1.23369	-1.65731	-0.625183	-1.89859	-1.1074	0.285192	-0.812318	-3.65041	-2.88472	-3.65041	-3.65041
Apoc2	-1.85864	-0.818179	-0.979208	-0.545513	-0.801819	-1.86085	-0.999124	-0.741727	-1.3776	-0.818338	-1.70878	-1.78906	-3.65041	-1.89952	-1.93324	-1.72414	-3.65041	1.23858
Apoe	3.27627	3.06427	2.6991	2.34344	2.70858	3.47454	2.21482	2.31484	2.21969	2.17229	2.54839	1.83795	3.86117	3.8553	4.07791	3.66465	3.76979	3.71837
Apoh	-3.65041	-3.65041	-3.65041	-2.68663	-3.65041	-3.65041	-3.65041	-3.65041	-3.65041	-3.65041	-3.65041	-3.65041	-0.436313	1.13071	3.11156	2.63535	2.91767	2.37366
Apol7d	0.85224	1.06396	0.874114	1.23285	1.28908	1.08044	1.18701	1.5081	1.31469	1.30819	1.00219	1.18791	1.9694	0.973496	1.70849	0.44586	2.09009	-3.65041
Apol9a	-3.65041	-3.65041	-3.65041	-3.65041	-3.65041	-3.65041	-3.65041	-3.65041	-3.65041	-3.65041	-3.65041	-2.74135	0.602449	-0.719886	0.703417	-2.01789	0.695054	-3.65041
Apoo	3.89769	3.42097	3.52855	3.81966	3.70758	3.61434	3.80339	3.99556	4.16307	3.90571	3.84151	4.0899	3.86652	3.45535	2.61774	3.0968	3.85995	3.24354
Apool	2.57594	2.14953	2.4396	2.65217	2.66108	2.7917	2.53058	2.63549	2.85506	2.78744	2.8941	2.74865	2.73844	2.50078	2.5565	2.5555	3.45961	3.4222
Apopt1	2.90311	2.9149	3.00677	2.76811	3.06671	2.79577	2.72528	3.07429	2.61344	2.78063	2.39029	2.46152	2.67214	3.38164	3.54614	3.53185	3.28618	3.67489
App	5.14954	5.04796	5.37352	4.95025	6.21168	5.62352	4.44747	4.8239	4.3639	5.23381	5.16894	4.86338	5.30483	4.88483	4.79568	4.77622	5.23583	5.50558
Appbp2	6.26879	6.32855	6.39782	6.45992	6.63931	6.45721	6.67987	6.6018	6.77453	6.53191	6.56016	6.66893	6.1238	6.02021	6.10179	6.1901	5.82631	5.51692
Appbp2os	-0.86178	-0.0539922	0.446255	-0.257519	-0.110178	-0.0295098	0.352665	0.804971	0.771865	0.586297	0.859543	0.128686	-3.65041	0.362183	0.113367	-2.88472	-3.65041	-0.563228
Appl1	5.73066	5.81342	5.83398	6.03952	6.17678	5.91065	5.75123	5.62235	5.6292	5.51276	5.57628	5.64064	6.13221	6.25583	5.69558	5.93779	6.10815	6.29903
Appl2	5.41257	5.5898	5.33292	5.17725	5.45336	5.49897	5.18802	5.29777	5.30813	5.23786	5.36809	5.53226	5.46963	6.05382	5.53478	5.73855	5.41505	5.59353
Aprt	4.67186	4.77348	4.65205	4.95782	4.6329	4.51922	4.84872	4.92365	5.09305	4.81272	4.85828	5.01705	3.99194	4.48426	4.44372	4.2801	3.67362	3.63194
Aptx	4.95294	4.99808	4.79957	4.97007	4.59485	4.68181	4.89887	4.98436	4.83883	4.81647	4.74211	4.88743	4.75715	4.67572	4.94886	5.00413	5.29736	5.02427
Aqp11	0.458262	0.861103	0.695167	1.53746	1.72758	0.969484	-0.118775	-0.322618	-0.465958	0.283374	0.496644	-0.360836	5.20262	4.94607	6.58715	5.8654	5.77895	6.5972
Aqp5	1.61369	1.71325	2.09434	2.40658	1.13536	1.83138	1.4675	1.18166	0.882157	1.52733	1.42527	1.07516	1.47359	-1.70975	-1.70186	-2.38716	-1.16443	1.23858
Aqp7	-3.65041	-3.65041	-3.65041	-2.68663	-3.12127	-3.65041	-3.65041	-3.65041	-3.65041	-3.65041	-3.65041	-3.65041	1.80589	1.51048	3.90533	3.70222	4.01189	3.21852
Aqp9	-3.65041	-3.65041	-3.65041	-2.11394	-3.12127	-0.584956	-3.65041	-3.65041	-3.65041	-3.65041	-3.65041	-2.18802	-1.39837	-2.37576	1.56038	1.02237	0.145146	-0.683854
Aqr	7.36932	7.37944	7.24024	7.20107	7.20522	7.19577	7.38082	7.39998	7.26401	7.28601	7.25615	7.35116	7.17058	7.22491	7.00143	7.14345	7.21587	7.01812
Ar	2.28227	2.20779	2.3697	2.44819	2.49041	2.81515	2.27393	2.01932	2.30137	2.78829	2.45324	2.32427	1.99132	1.61178	2.74081	1.65373	1.9328	2.36
Araf	4.76574	4.65181	4.46499	4.64168	4.42112	4.59523	4.88108	4.97779	4.8587	4.90578	4.73294	4.74219	4.2202	4.32279	3.97636	4.05807	4.12409	4.18719
Arap1	4.53237	4.36572	4.20991	3.99048	3.92458	4.36034	3.99417	4.03361	3.61923	4.21147	4.35101	3.97947	3.41815	4.50116	3.22132	3.97201	3.3498	4.61201
Arap2	4.22838	4.32023	4.60947	4.44139	4.85512	4.39618	4.19614	4.17832	4.14105	3.95566	4.38474	3.79923	5.15025	5.06288	5.83334	4.94764	5.53166	5.22188
Arap3	3.55187	3.46979	3.32199	3.0451	3.14246	3.60555	3.28134	3.5818	3.18057	3.14631	2.87197	3.32287	3.30895	3.64978	3.24231	3.72673	3.88164	4.0516
Arc	5.07932	5.03179	4.9679	4.69007	5.0148	4.70624	5.10078	5.03035	5.12831	4.82745	5.02129	5.26262	4.64134	4.71101	5.12245	4.91601	5.21035	4.03736
Arcn1	7.10544	7.06853	7.06744	7.04891	7.38158	7.09282	7.40394	7.43543	7.4666	7.2284	7.28375	7.42503	7.01873	6.989	6.99113	7.07416	6.78127	6.94035
Arel1	5.6886	5.7088	5.81547	5.8038	5.77627	5.68989	5.64795	5.50126	5.49124	5.59387	5.65505	5.52713	6.89565	6.70824	7.04388	6.71138	6.90952	7.17799
Arf1	6.81859	6.71784	6.96218	7.04014	7.22785	6.96443	7.08106	7.10278	7.17	6.98014	6.97388	7.15746	6.71564	6.79353	6.15256	6.40944	6.46249	6.46337
Arf2	3.47762	3.55865	3.86171	3.57591	4.83743	3.95046	4.07118	3.92592	3.99864	3.6636	3.60265	3.6425	4.05	3.9603	3.6716	3.57973	3.57058	4.2081
Arf3	6.88897	6.87302	6.90083	6.84736	6.60682	6.83945	6.86652	6.93534	6.92589	6.98491	6.88207	6.97103	6.64973	6.88669	6.37361	6.50845	6.73775	6.34301
Arf4	5.46462	5.32505	5.36516	5.4337	5.59121	5.39076	5.57921	5.62597	5.60417	5.51904	5.51335	5.52154	5.108	5.19934	4.98603	5.11483	5.45899	4.40948
Arf4os	-1.20885	-0.818179	-1.76882	-1.38687	-0.634431	-1.21138	-0.460338	-0.174597	-3.13859	-0.625183	-1.89859	-0.496538	-1.39837	-0.473565	-0.47926	-0.782197	1.14101	-3.65041
Arf5	4.95713	4.76235	4.95583	5.00432	4.47728	4.90589	4.84709	4.80218	4.86677	4.79826	4.91168	4.79872	4.6239	4.77396	4.45275	4.67908	4.73413	4.31427
Arf6	5.98774	5.75926	5.84142	5.77518	5.48041	5.72126	6.05766	6.1347	6.09481	5.99857	6.00349	6.09991	5.29363	5.30073	5.13186	4.88911	5.12201	5.32512
Arfgap1	5.21773	5.32483	5.27515	5.33463	5.2146	5.29017	5.45573	5.50364	5.49211	5.30418	5.33302	5.52811	4.81421	4.81123	4.73009	4.90799	4.59185	4.61201
Arfgap2	4.99293	4.93265	5.03737	4.89094	5.21172	4.98129	5.21993	5.37108	5.38273	5.36701	5.31591	5.17544	4.5446	4.91577	4.41936	3.99237	4.60972	4.40209
Arfgap3	4.38037	4.4506	4.47972	4.15306	4.32559	4.24448	4.17018	4.13191	4.11616	4.20767	4.29113	4.26561	4.50287	4.88483	4.43767	4.35709	4.54777	4.31859
Arfgef1	7.32558	7.33931	7.35284	7.36584	7.47565	7.30905	7.46271	7.31749	7.32206	7.28751	7.24497	7.2385	7.68725	7.69198	7.66108	7.85269	7.62763	7.6545
Arfgef2	5.4192	5.29849	5.34708	5.44126	5.59437	5.3331	5.29284	5.24276	5.07415	5.37833	5.31987	5.1407	5.6425	5.74677	5.80659	5.88173	5.77316	6.02851
Arfgef3	3.62707	3.81063	3.84334	3.7998	4.013	3.6194	3.64598	3.87841	3.81095	3.5325	3.68955	3.72642	4.18259	4.37873	4.60552	4.29657	4.06908	2.5972
Arfip1	3.18962	3.25038	3.31333	3.20935	3.7407	3.35327	3.16593	3.29438	3.20624	3.40994	3.16126	3.05446	3.25562	3.667	2.87854	3.55941	3.98075	2.28001
Arfip2	3.5172	3.56535	3.32199	3.12237	3.83003	3.45871	3.53598	3.70479	3.33498	3.4914	3.73153	3.73629	3.1908	3.54656	2.6908	1.40306	2.88941	3.22691
Arfrp1	3.84787	3.56535	3.86213	3.86158	4.15292	3.91683	3.94985	3.91192	4.0017	4.01051	4.02649	4.02942	3.86117	4.09714	3.39379	2.79455	3.66615	3.02041
Arg2	-0.348149	-0.148278	-1.57257	-0.193685	-0.414942	-0.0883197	0.944181	1.06735	1.05695	0.900707	0.320495	0.128686	0.285192	0.0308525	-0.0135543	-0.126513	-0.174717	-3.65041
Arglu1	6.80605	6.78515	6.60404	6.66489	6.68707	6.7019	6.90536	7.05168	6.96241	6.79932	6.8841	6.84295	6.39337	6.64338	6.49755	6.44403	6.46728	6.75345
Arhgap1	6.14233	6.22293	6.25488	6.13669	6.01452	6.2027	6.4015	6.36582	6.38504	6.2793	6.30679	6.49042	6.14839	6.12564	5.9926	6.15441	5.83375	5.96348
Arhgap10	5.75297	5.75438	5.80437	5.97502	5.70867	5.80049	5.66912	5.73608	5.70244	5.61794	5.64856	5.57551	5.81386	5.6429	5.42281	5.35586	5.47096	5.4629
Arhgap11a	5.23601	5.24733	5.36964	5.05464	5.49515	5.40562	5.86045	5.87629	5.99639	5.92235	5.78309	5.84044	4.69574	4.79761	4.09339	3.95655	4.38522	4.91973
Arhgap12	5.48004	5.49853	5.36665	5.38763	5.47915	5.46447	5.32452	5.40158	5.51187	5.22397	5.17678	5.49718	5.8154	5.76087	5.7841	5.75652	5.94109	5.75451
Arhgap17	5.61142	5.65668	5.7376	5.61184	5.65513	5.56903	5.54292	5.65396	5.6757	5.66617	5.4703	5.67303	5.32201	5.3838	4.95035	4.97603	5.20176	4.98771
Arhgap18	1.25918	1.06396	0.874114	0.56548	1.33015	1.76814	1.58108	1.96714	2.11063	1.83717	2.0142	1.72045	-0.691679	-2.11808	-0.0814637	-3.65041	0.820114	-2.04397
Arhgap19	4.77073	4.92587	4.92387	4.7941	5.38739	5.13364	5.59282	5.41137	5.6112	5.50762	5.41092	5.41222	4.80496	4.90855	4.59005	4.54766	4.98514	5.04813
Arhgap20	3.47304	3.69693	3.68543	3.39571	4.18434	3.71408	3.4701	3.73319	3.79624	3.69562	3.84908	3.66055	3.27362	3.14712	3.38752	2.73538	3.77753	3.49347
Arhgap20os	-1.08365	-1.77138	-3.03033	-2.11394	-3.65041	-2.66284	-3.65041	-2.35968	-3.13859	-3.65041	-2.68906	-3.12543	0.135777	0.522142	0.576962	-0.52907	1.44278	2.0345
Arhgap21	7.1996	7.26518	7.11731	7.05266	6.99507	7.08826	7.11015	7.0863	6.96953	7.04947	6.95252	7.02743	6.78629	7.05091	6.93311	6.92054	7.08801	6.62603
Arhgap22	1.63206	1.79152	1.78987	2.35415	2.24512	1.59206	1.49757	1.67353	1.2748	1.82067	1.22802	1.80946	0.998443	0.559507	0.662485	1.79951	0.878801	-3.65041
Arhgap23	4.70283	4.80055	4.88055	5.00772	5.12116	4.75305	4.06003	3.96901	3.94247	4.44464	4.54272	4.19303	4.17016	4.85132	4.60363	3.90378	4.46878	3.83821
Arhgap24	1.53387	1.44596	0.874114	1.06293	0.826445	1.58831	0.919712	0.195609	0.273755	1.07773	0.560755	0.897071	2.61682	2.58654	2.34772	2.91783	1.7872	2.71877
Arhgap25	-0.277865	-1.16722	-0.979208	-0.714399	-0.99121	-1.08623	-1.09559	-1.44368	-1.65731	-2.31113	-1.25477	-2.43832	-1.94636	-3.65041	-0.0135543	-3.65041	0.406802	-3.65041
Arhgap26	6.74036	6.93548	6.60815	6.12344	6.13509	6.63378	6.52683	6.60467	6.43685	6.46044	6.63723	6.61906	6.98492	7.15691	6.85465	7.34996	6.7417	6.91396
Arhgap27	-0.146803	-1.26949	-0.754426	-0.394341	0.854869	0.0813724	-1.70769	-0.547045	-0.765285	-0.376691	-0.909957	-1.1074	-0.436313	-0.399993	0.703417	-2.88472	-1.16443	-1.75252
Arhgap28	3.3447	3.44982	3.10182	3.12237	2.77701	3.15139	3.25713	3.48863	3.41422	3.13967	3.02017	2.96429	3.18225	2.98493	3.36218	3.34657	3.74635	1.80722
Arhgap29	6.97609	6.94175	7.09532	6.92683	7.06483	6.99255	7.08832	6.83439	6.95615	6.82338	6.80071	6.93732	7.50882	7.3847	7.61837	7.86682	7.72591	7.9168
Arhgap30	1.98064	1.9501	1.88481	1.45821	0.734592	1.77476	1.90032	1.97668	1.92854	1.7837	1.76166	2.18705	2.37152	2.11682	1.99891	3.0968	1.74996	2.12706
Arhgap31	5.89609	5.93616	5.49038	5.17936	5.26008	5.74966	5.76864	5.86057	5.50337	5.71094	5.73681	5.61854	5.03655	5.21127	5.41513	5.75056	5.17332	5.75161
Arhgap32	7.44177	7.46821	7.51677	7.61128	7.47825	7.4193	7.42593	7.3122	7.36098	7.36329	7.31015	7.28344	7.68557	7.51793	7.40406	7.42939	7.51438	7.28671
Arhgap33	4.82962	4.77348	4.57365	4.58252	4.56139	4.77405	4.89965	4.84328	4.9032	5.00585	5.1043	4.87957	4.7702	4.70477	4.73282	4.56136	4.27483	3.37013
Arhgap33os	2.39414	2.41155	2.00495	2.07199	1.74895	2.17055	1.8377	2.33145	1.80937	1.96275	1.84278	2.26255	2.67214	1.90092	2.63899	3.08737	0.695054	3.25998
Arhgap35	7.61458	7.6988	7.62767	7.449	7.47132	7.59346	7.66512	7.63513	7.58365	7.62125	7.60805	7.5989	8.01835	8.07487	8.12193	8.10522	7.9365	7.94281
Arhgap39	5.20428	5.23921	5.02188	5.22503	5.11397	4.92905	4.62369	4.8096	4.66575	4.92694	4.86277	4.59304	5.13015	5.15379	5.06393	4.94764	4.87701	5.17495
Arhgap4	2.12253	2.05749	2.05034	1.71924	1.50354	1.97904	2.12778	2.4781	2.08664	2.14605	2.76957	2.3343	1.56411	2.13054	0.172872	0.503742	1.87631	0.677758
Arhgap42	1.3057	1.3492	1.47178	1.0339	1.73372	1.66331	1.28797	1.64857	1.46581	1.42191	1.22802	0.813458	1.87824	2.11682	1.70849	2.79455	2.67434	3.74782
Arhgap44	5.93137	6.01039	5.81536	5.75003	5.53413	5.81651	5.72314	5.83401	5.74402	5.76851	5.6112	5.76083	5.79685	6.09018	6.01096	6.01955	5.78088	6.05231
Arhgap45	2.35043	2.568	2.45092	1.68738	2.26538	2.55377	2.70466	2.97897	2.59655	2.21077	2.6559	3.06414	2.94346	1.51999	1.09046	3.2484	2.36103	2.88914
Arhgap5	6.40723	6.40933	6.71037	6.71038	7.0022	6.65432	6.68669	6.40464	6.57607	6.34551	6.52041	6.47577	7.22014	6.88467	7.04677	7.30875	7.09337	7.29082
Arhgap8	0.913601	0.624987	-0.0326237	0.409801	0.273519	0.611314	0.0664946	-0.271572	0.177535	0.376602	0.701234	0.528907	1.34332	1.87151	-0.675202	0.612972	0.484441	1.89407
Arhgap9	1.836	2.32647	1.85953	1.90564	0.963277	2.09327	1.56539	1.924	1.55009	1.42191	1.46326	2.11902	1.47359	1.05424	0.781954	1.62793	2.38147	0.945136
Arhgdia	7.09633	6.88928	6.87131	6.86686	6.89939	6.83441	7.0863	7.31856	7.32267	7.308	7.16343	7.2054	6.76657	6.83125	6.65067	6.41793	6.65632	6.58256
Arhgdig	2.92786	2.8681	3.13239	3.12237	3.45251	2.90985	3.07578	3.15207	3.40501	2.98542	3.22607	3.08746	2.43687	0.403866	0.532222	-0.217118	2.23191	1.205
Arhgef1	6.51942	6.62233	6.33532	6.4534	6.0674	6.32274	6.62294	6.80593	6.70021	6.7241	6.7549	6.81756	6.00898	6.10952	5.88107	5.5172	5.96143	6.06289
Arhgef10	4.1416	4.42012	4.29753	4.21904	4.18686	4.15128	3.98241	3.97193	3.83344	4.30278	4.20525	3.77364	3.09284	3.90695	3.68699	3.26524	3.64009	3.97399
Arhgef10l	3.85532	3.73011	3.5655	3.01164	2.8288	3.60091	3.93741	4.0364	3.77388	3.94771	3.73112	4.12587	3.02008	3.35266	2.06322	3.14307	2.86058	2.0535
Arhgef11	6.76653	6.72451	6.73606	6.72795	6.79512	6.81298	6.79995	6.66262	6.66939	6.61551	6.71677	6.66113	7.07882	7.0505	6.79548	6.78187	6.8476	7.00896
Arhgef12	6.81004	6.88281	6.80599	6.67342	6.83886	6.89117	6.80204	6.786	6.8129	6.76794	6.72301	6.7992	6.85655	7.08053	6.45669	7.17653	6.68743	6.70622
Arhgef15	6.18082	6.192	6.08416	6.15481	5.42141	6.02717	5.77129	5.94176	5.90054	5.86115	5.77775	6.02266	5.99182	6.18243	6.10361	6.14739	5.75095	5.77896
Arhgef16	4.01468	4.16936	3.78725	3.58913	3.18282	3.85653	4.07118	4.33722	3.73399	4.15961	4.20525	4.19275	4.00815	4.25636	3.44296	4.21228	3.9448	3.27624
Arhgef17	6.62293	6.62736	6.51719	6.39452	6.18939	6.57013	6.5283	6.59288	6.40533	6.71983	6.73328	6.64298	6.27462	6.57375	5.82247	6.60888	5.90431	6.25346
Arhgef18	7.02422	7.08914	6.65127	6.87064	6.33894	6.726	6.76389	6.74781	6.44237	6.77919	6.70956	6.56954	6.77615	6.72581	6.55739	6.47212	6.60607	6.05596
Arhgef2	5.74307	5.7916	5.7652	5.75054	5.71838	5.74188	5.88261	5.96183	5.69999	5.89345	6.07092	6.00031	5.74893	5.78808	6.76541	6.48242	6.25605	6.50561
Arhgef25	5.26146	5.26001	4.72338	4.78818	4.32838	4.86965	4.47334	4.45348	4.06153	4.5582	4.48095	4.46121	4.60981	5.18446	4.59032	5.52246	4.84131	5.25507
Arhgef26	0.883247	0.811871	1.91129	1.75365	3.53782	1.59019	1.24922	1.10454	1.22962	1.10523	1.13694	0.600496	1.16196	0.27502	1.84279	0.854561	0.878801	-0.0767101
Arhgef28	1.00101	0.680897	-0.0326237	0.409801	0.826445	0.611314	-0.170377	0.30054	0.0415375	0.376602	0.829241	0.693859	1.47359	0.403866	1.37012	1.845	0.758939	2.09074
Arhgef3	3.58525	3.58454	3.74646	4.18343	3.66406	3.77968	3.80673	3.7702	3.8231	3.83765	3.6424	3.48478	2.9986	3.51362	2.77001	2.38117	2.34029	3.22691
Arhgef33	3.58525	3.69693	3.56498	3.8316	3.3859	3.57745	3.40593	3.28674	3.37797	3.43345	3.56176	3.22379	4.30795	4.5038	3.87788	4.38354	3.76202	3.80497
Arhgef37	-1.49747	-1.37955	-1.24559	-0.545513	-1.46627	-2.66284	-0.999124	-0.96684	-1.82053	-0.232015	-2.68906	-1.00265	-1.94636	-0.551092	-3.65041	-0.52907	-0.0600335	-3.65041
Arhgef38	-1.49747	-2.10788	-1.99605	-0.806885	-3.12127	-0.280665	-0.999124	-1.56137	-1.14342	-2.31113	-1.39083	-2.18802	-0.558353	-1.13154	-0.573907	-0.417421	-3.65041	-0.161764
Arhgef39	1.35077	0.887481	0.971713	0.60191	0.882744	0.820792	1.71367	2.03967	1.00913	1.75274	1.71602	2.26045	-1.39837	-0.633022	-0.227697	-1.72414	-3.65041	-3.65041
Arhgef4	2.55683	2.19632	2.62302	2.68395	2.02515	2.30115	2.0191	1.7222	1.63603	2.01153	2.14297	2.08496	1.87824	2.1661	2.68059	0.115465	2.11472	2.01526
Arhgef40	3.54073	3.36703	3.29836	3.10661	3.08543	3.34274	3.55239	3.8947	3.8231	4.05737	3.83161	3.76328	1.71398	1.2948	2.79105	1.81788	2.77973	-0.683854
Arhgef5	3.46998	3.7037	3.1457	3.30471	3.18786	3.58688	4.34208	4.66642	4.28629	4.41994	4.63998	4.50206	2.43687	1.94394	1.14199	2.38117	3.05125	2.98128
Arhgef6	1.8088	2.10425	2.40157	1.54683	1.26174	2.15922	1.08287	0.262946	0.207505	1.11067	1.3779	1.07516	3.49916	3.89128	5.02531	4.69656	4.72256	5.60016
Arhgef7	6.76341	6.78188	6.72158	6.87474	6.6785	6.67944	6.60464	6.71975	6.73553	6.61689	6.58298	6.57007	6.45873	6.67564	5.97662	6.49148	6.32692	6.25664
Arhgef9	3.38208	3.49964	3.14918	2.77131	2.6659	3.31974	2.33164	2.71358	2.78651	2.52976	2.61652	2.81607	3.31069	3.64109	3.25062	3.22278	3.03972	2.80198
Arid1a	8.87988	8.85546	8.61329	8.53081	8.3557	8.66531	8.58637	8.768	8.73903	8.63002	8.70157	8.70333	8.69304	8.7957	8.35915	8.62021	8.36599	8.28509
Arid1b	5.76914	5.76452	5.87755	5.73248	5.70253	5.83166	5.80666	5.74416	5.78914	5.82253	5.87635	5.53541	5.82656	5.71494	5.66158	5.09048	5.40984	5.234
Arid2	6.68199	6.72949	6.67513	6.4778	6.54275	6.82149	6.70828	6.74901	6.77547	6.59995	6.61114	6.66257	7.06086	7.23646	7.09178	7.19482	7.081	7.07835
Arid3a	6.14104	6.16346	6.15288	5.90221	5.61384	5.87049	6.04244	6.09173	5.87284	6.03549	5.91744	6.07626	5.8384	6.09376	5.37974	5.90809	5.48968	5.4816
Arid3b	6.21199	6.18911	6.1744	6.15128	6.12367	6.072	6.40145	6.44954	6.38029	6.29945	6.27553	6.48311	5.97088	6.40306	5.94113	6.28394	5.84115	6.03462
Arid4a	4.91836	4.88777	4.82286	4.55492	4.93234	4.94857	5.84022	5.93723	5.97313	5.68895	5.83167	5.81916	4.23129	4.38655	4.33396	4.71014	4.49716	4.42414
Arid4b	6.86019	6.81856	6.92748	6.9318	7.09046	6.82369	6.88005	6.75283	6.89782	6.61784	6.62493	6.60307	7.13207	7.2636	6.83216	6.87247	7.11565	7.34129
Arid5a	4.61666	4.77958	4.78532	4.45316	4.78669	4.68181	4.74999	4.76705	4.88477	4.8593	4.74293	4.88811	4.44091	4.69368	4.13513	3.89353	3.903	3.35948
Arid5b	2.17359	2.08883	2.68956	2.04579	2.63673	3.04596	1.75713	1.77414	1.85065	2.41137	2.31684	1.78039	1.30882	0.945544	1.75011	-2.01789	-0.586318	-0.0767101
Arih1	6.59622	6.65209	6.58038	6.65679	6.65863	6.5432	6.73788	6.71414	6.83449	6.63345	6.82678	6.72683	6.62751	6.6999	6.34034	6.49496	6.71084	6.5242
Arih2	5.92077	5.84336	5.92645	5.83771	5.99206	5.85272	6.05899	6.12247	6.05937	5.90377	5.9805	6.05024	6.13553	6.17704	6.17183	6.43234	6.49545	5.97473
Arl1	5.01585	4.9128	4.99117	5.08809	5.29952	5.12396	5.11876	5.10468	5.16696	4.95385	4.98051	5.04466	4.71891	4.58532	3.97301	4.16374	4.48304	4.74938
Arl10	1.70329	1.63048	1.121	1.3659	1.48366	1.47508	1.16844	1.18166	1.53329	0.803323	1.33972	1.41479	2.19391	1.61178	-0.902003	1.3409	2.4215	-0.252149
Arl11	-3.65041	-3.65041	-3.03033	-3.65041	-3.65041	-3.65041	-3.65041	-3.65041	-2.79513	-3.65041	-3.65041	-3.65041	0.44619	-0.633022	-0.33137	0.639035	-0.790659	-3.65041
Arl13a	-3.65041	-3.65041	-3.65041	-3.65041	-3.65041	-3.65041	-3.65041	-3.65041	-3.65041	-3.65041	-3.65041	-3.65041	3.90166	3.06506	4.89178	3.16117	3.68189	4.14752
Arl13b	3.95719	4.03664	3.80501	3.77648	4.10669	3.83651	3.40107	3.58872	3.56238	3.52284	3.50586	3.61806	4.51086	4.03847	4.44975	4.13655	4.44955	4.38345
Arl14ep	4.6452	4.52121	4.62731	4.60961	4.51984	4.5383	4.85373	4.62139	4.61055	4.63096	4.5615	4.63809	4.6309	4.77971	4.8962	4.83574	4.71815	3.92842
Arl14epl	4.14416	4.35136	4.14548	4.54723	4.00256	4.29626	4.24915	4.08764	4.09054	4.10549	4.16638	4.41728	4.55199	4.1217	4.29096	4.60829	4.72216	3.85292
Arl15	3.01443	2.51515	2.68956	2.40658	2.67708	2.93959	2.66841	2.5948	2.92115	2.65414	2.73158	2.69514	2.42081	1.94394	2.6703	2.8061	3.28618	3.66997
Arl16	2.00199	1.95917	2.12153	2.18916	2.4151	2.29771	2.40223	2.70596	2.45114	2.08796	2.2555	2.2615	1.98259	1.33629	1.99891	1.57491	1.9328	1.4795
Arl2	2.65891	2.22576	2.2451	2.55332	2.91906	2.49489	2.36737	2.04974	2.14312	2.58648	2.30478	2.5477	1.27349	1.66418	0.961409	2.45638	2.40761	2.51738
Arl2bp	5.28356	5.2884	5.30557	5.29039	5.18244	5.18886	5.13161	5.25031	4.9656	5.04365	5.19026	5.10744	5.43026	5.48679	6.57886	6.17237	6.26626	6.67207
Arl3	4.20126	4.04731	3.91544	4.01467	3.81637	3.98296	3.73492	3.5818	3.24392	3.87807	3.74336	3.81005	4.17016	4.5463	4.68763	4.22094	4.21914	4.1431
Arl4a	5.52902	5.34141	5.15424	5.32893	4.92315	5.07119	5.19032	5.23782	5.09291	5.32961	5.15557	5.35546	6.57677	6.76282	7.46536	7.41207	7.30282	7.92745
Arl4aos	-1.34595	-0.602597	-2.59805	-0.627486	-0.801819	-0.502659	-1.19897	-1.56137	-2.46293	-2.63594	-1.89859	-1.62454	-0.838592	1.02783	1.12099	-0.782197	0.989464	-0.960363
Arl4c	2.42607	2.18863	2.30874	2.32176	1.35026	2.05302	2.46361	2.13735	2.27128	1.83717	2.02761	1.85199	1.94714	2.49018	2.56318	2.69868	0.820114	1.87284
Arl4d	3.10271	2.96699	2.81759	2.54399	2.41605	2.78434	2.28355	2.60167	2.69805	2.38917	2.63853	2.77098	2.81417	3.25355	1.96565	2.87351	2.20922	3.02041
Arl5a	5.11044	5.26424	5.22671	5.1933	5.05624	5.16167	5.57118	5.50483	5.59094	5.30566	5.37977	5.50708	5.43787	5.45592	4.95098	5.28438	5.42715	5.43963
Arl5b	3.75914	3.74001	3.90847	3.93837	4.03304	3.98866	4.03461	3.79466	4.29004	3.68654	4.09527	4.13365	4.00223	3.87284	4.12763	4.25757	4.63292	2.92154
Arl6	2.87485	2.93285	3.02128	2.9136	2.89805	3.08041	2.95997	2.66854	2.7279	2.78744	2.64724	2.6233	3.27362	3.09081	2.88033	3.52488	2.99929	3.70643
Arl6ip1	4.6155	4.79913	5.08885	4.85969	5.51977	5.18126	5.4958	5.45086	5.74576	5.55837	5.6245	5.72315	4.09624	4.57828	3.93871	4.3762	4.202	5.02907
Arl6ip4	5.67427	5.79453	5.51838	5.34648	5.14135	5.33029	5.84591	6.11385	5.85037	5.70702	5.74596	5.70199	4.87147	4.63429	3.86486	4.91334	4.72216	4.80647
Arl6ip5	1.72056	1.67246	1.35605	1.25589	1.2681	1.98333	1.68637	1.73723	1.72308	1.85348	1.98701	2.31417	0.483781	0.083104	1.42009	2.28541	1.14101	-3.65041
Arl6ip6	3.54704	3.56201	3.55504	3.63423	3.98015	3.67792	3.64075	3.81222	3.75226	3.65433	3.90463	3.5764	3.22912	3.18348	3.26299	4.25504	3.55267	3.62751
Arl8a	3.80317	3.62749	3.5655	4.03479	3.33131	3.5817	3.46588	3.52879	3.47708	3.6166	3.60265	3.55939	2.54455	2.77066	2.06322	2.62235	2.73913	1.64139
Arl8b	4.37738	4.35072	4.29125	4.17136	4.49319	4.33595	4.45855	4.66479	4.65977	4.60687	4.69773	4.66776	4.51465	4.23602	4.67996	4.4406	4.16062	4.90491
Arl9	-3.65041	-3.65041	-3.03033	-3.65041	-1.96544	-2.08204	-3.65041	-2.59044	-2.46293	-2.63594	-2.68906	-3.12543	3.60743	2.93605	4.67996	4.36062	4.47355	4.58941
Armc1	4.6155	4.76542	4.68337	4.74608	4.65751	4.75723	4.91675	4.9412	4.98427	4.64742	4.85076	4.92858	4.52219	4.28425	4.4407	4.50932	4.70605	4.61201
Armc10	4.39389	4.40339	4.3255	4.4786	4.39474	4.55593	4.6732	4.56844	4.81209	4.62646	4.79873	4.76221	4.30314	4.27304	4.81215	4.41443	4.34416	4.04687
Armc12	-3.65041	-3.65041	-3.65041	-3.65041	-3.65041	-3.65041	-3.65041	-2.59044	-2.76156	-2.31113	-3.65041	-3.12543	2.09616	1.20333	4.50289	3.45324	3.89591	2.6972
Armc2	1.43897	1.02344	1.48507	1.95012	1.01457	1.57511	0.707406	0.780992	0.0883091	0.61719	1.10947	0.504231	2.27476	2.32751	3.04145	1.49154	2.22966	2.78731
Armc3	-2.6613	-1.62862	-0.862444	-0.714399	-0.557497	-1.08623	-1.86885	-2.59044	-3.13859	-2.63594	-2.68906	-3.65041	1.2001	0.27502	2.85421	2.21785	3.11366	1.73847
Armc4	-1.34595	-0.982171	-1.76882	-1.38687	-2.17934	-1.49987	-2.05031	-2.86527	-1.51069	-2.31113	-3.0911	-3.65041	2.78936	1.40153	3.04941	2.11017	2.27625	1.80722
Armc5	3.54219	3.57682	3.49064	3.63423	3.3859	3.38009	3.53195	3.67907	3.56652	3.55311	3.64675	3.38694	3.4737	3.20722	3.36856	3.14307	3.14986	2.97133
Armc6	3.8197	3.76318	3.96763	3.99734	3.81961	3.82022	4.14692	4.19225	4.02293	3.91351	4.05623	4.14538	3.51211	3.18348	3.29012	3.13393	3.12583	2.66175
Armc7	3.17403	3.18519	3.05136	2.9423	2.61113	2.87948	2.71963	2.947	2.87521	2.95476	2.45225	2.5477	3.10193	1.68123	2.10964	3.12474	3.03843	2.70922
Armc8	5.19613	5.24733	5.23934	5.18117	5.53961	5.39318	5.40153	5.33036	5.33964	5.24174	5.26786	5.34384	5.12669	5.34487	4.88535	5.13282	5.64272	5.57557
Armc9	5.13206	5.19032	5.01159	5.15581	4.83618	4.89131	4.6903	4.74274	4.56889	4.82848	4.74557	4.70226	5.37923	5.46444	5.35715	5.3973	5.15622	4.73797
Armcx1	2.62354	2.36879	2.84447	2.7769	2.435	2.46248	1.97584	2.14582	2.2312	2.2836	2.58512	2.18705	1.99132	2.53776	1.12099	1.60167	-0.586318	1.59029
Armcx2	4.58754	4.49611	4.66864	4.64277	4.17592	4.70624	4.06003	3.97431	4.23264	4.44706	4.30193	4.09019	4.51086	4.45729	4.44975	4.02732	4.03788	3.65139
Armcx3	2.2217	2.30795	2.29498	2.06809	2.17583	2.43246	1.8507	2.20198	1.42448	2.45371	1.95789	1.93214	0.954494	2.01291	2.24056	1.58567	0.695054	0.349292
Armcx4	5.27905	5.20386	5.30088	5.58012	4.87781	5.06951	4.45004	4.3554	4.50891	4.28816	4.31866	4.02973	4.59199	4.95661	3.33639	3.46057	3.97874	3.4222
Armcx5	3.46128	3.77318	3.59643	3.88726	4.07412	3.82022	3.90131	4.07758	4.01175	3.76666	3.89442	3.86126	3.97719	3.77498	3.25544	3.85458	4.19625	4.38194
Armcx6	0.458262	-0.0539922	0.0291387	0.637442	-0.285215	0.6834	-0.659779	-0.487581	-0.465958	0.0199587	0.0320694	-0.45447	0.75884	-3.65041	-3.65041	0.187874	0.820114	-3.65041
Armt1	3.9359	3.88987	4.03654	3.93552	4.3723	4.12628	3.63437	3.7159	3.93545	3.50127	3.80733	3.77512	3.87007	3.86167	3.91582	3.97712	3.84605	4.4782
Arnt	5.70561	5.60469	5.67269	5.74506	6.01468	5.77721	5.67104	5.68102	5.42844	5.57629	5.70639	5.60938	5.81954	5.78592	5.57255	5.96792	5.748	6.3598
Arnt2	3.27568	3.48597	3.45733	3.4959	2.94442	3.18716	2.94792	2.85811	3.00886	3.27296	2.77196	2.87775	3.62856	3.77419	3.0173	2.72325	3.83793	0.817632
Arntl	4.75614	4.59237	4.17993	4.5848	4.13594	4.63304	4.95036	4.88747	4.7478	4.82332	4.78122	4.77994	4.31622	4.61468	4.00611	4.43317	4.23045	4.11173
Arntl2	1.19884	0.887481	1.66703	1.66	0.843566	1.12513	1.22745	0.581648	0.8715	0.940947	0.807644	1.15432	1.67389	1.55741	1.16268	1.88693	1.12655	2.77592
Arpc1a	5.62341	5.65442	5.62348	5.72764	5.81413	5.57957	5.58116	5.70607	5.74858	5.7115	5.795	5.81289	5.36041	5.36677	5.35859	5.4249	5.06313	4.95526
Arpc1b	4.25973	3.94314	4.06299	4.13079	4.65145	3.76522	4.00148	4.48053	4.53088	4.52396	4.19013	4.32443	2.62946	3.32309	2.54753	2.54451	3.0281	3.01073
Arpc2	6.41918	6.29255	6.21972	6.18319	6.39633	6.31765	6.4584	6.64778	6.53867	6.51599	6.55554	6.73821	5.94163	6.10605	5.51623	6.09445	6.31356	6.25664
Arpc3	6.28346	6.35993	6.20189	6.15274	5.61944	6.04908	6.48163	6.54282	6.5307	6.48211	6.52992	6.74146	5.87157	6.09806	5.55435	5.90729	5.85419	5.84299
Arpc4	4.25559	4.40152	4.35624	4.38972	4.12723	4.29108	4.93823	5.06514	4.9909	4.98379	5.15083	5.24757	3.94104	4.25892	4.12387	4.13197	4.43886	3.93816
Arpc5	5.52743	5.37876	5.24667	5.33029	5.39467	5.29478	5.54062	5.62597	5.70975	5.40762	5.5181	5.65673	4.38406	4.93722	4.49708	3.57973	4.97172	4.34543
Arpc5l	5.25554	5.23478	5.16889	5.03329	5.30789	5.15265	5.48103	5.607	5.58697	5.38536	5.40644	5.43455	4.8593	4.87652	4.68022	4.99684	4.9981	4.96507
Arpin	-1.34595	-0.602597	-0.235561	-3.08949	-0.715699	-0.280665	-1.56273	-0.673872	-0.399914	0.330741	0.0843246	0.0818081	-0.838592	-1.13154	-1.93324	-3.65041	-3.65041	-3.65041
Arpp19	6.13992	5.92398	5.91484	5.99835	6.03252	5.88403	6.24664	6.56511	6.5062	6.29282	6.1293	6.3273	5.86787	6.28401	5.43045	5.60774	6.02614	5.98218
Arrb1	1.37715	1.22306	0.977991	1.10161	1.0321	1.51513	0.675609	0.854067	0.419885	1.42846	0.946809	0.813458	0.779139	0.666122	-1.5025	1.51706	0.145146	-2.40958
Arrb2	6.32845	6.30489	6.15799	6.19076	6.06025	6.16385	6.29495	6.3198	6.22086	6.29199	6.12228	6.33987	6.03295	6.23938	5.60005	6.0417	5.93073	5.54235
Arrdc1	2.17234	2.29098	2.50626	2.617	2.98356	2.3023	2.51515	2.44262	2.65209	2.22212	2.81125	2.40265	3.3263	2.17816	2.28168	2.63535	2.39962	2.80198
Arrdc2	4.13807	3.97088	3.99922	4.31817	3.97044	3.86391	3.73176	3.80896	4.08478	4.00029	3.79914	3.86611	4.08609	4.44262	4.07011	4.07105	3.72171	3.82722
Arrdc3	6.21877	6.28417	6.32651	6.27348	5.98444	6.47121	6.62838	6.30936	6.53392	6.42616	6.25573	6.40909	6.98431	7.08458	6.85465	6.81726	6.77993	6.71296
Arrdc4	5.09264	5.07677	4.9679	5.40821	4.83743	4.88311	5.34546	5.28173	4.98735	5.28972	5.19324	5.22671	4.6448	4.62771	4.28085	5.01138	4.6774	4.25398
Arrdc5	-1.85864	-2.31102	-2.59805	-2.68663	-1.77919	-2.66284	-2.25792	-2.35968	-2.21564	-2.63594	-3.65041	-3.12543	-1.94636	1.08019	1.74815	3.0968	3.10139	2.31191
Arsa	-0.422034	-0.537346	0.145256	0.139386	0.31503	-0.864431	-0.823623	-0.322618	-0.399914	0.330741	-0.335654	-0.727512	0.544335	0.440378	2.92514	2.92738	2.09009	-2.40958
Arsb	0.395125	0.406928	0.860587	1.2536	2.3102	1.60882	0.468533	0.195609	-0.178889	0.93176	0.239856	-0.0270203	1.55236	2.07744	2.30846	0.724283	1.89634	2.04782
Arsg	1.05647	1.31427	1.33175	1.00698	1.33015	1.76814	1.08287	0.854067	1.03324	1.52733	1.1808	1.76564	1.99132	1.2948	1.64687	1.06144	1.09224	-1.75252
Arsi	-1.20885	-1.16722	-0.559991	-1.38687	-0.557497	0.133773	-1.78602	-1.56137	-2.46293	-0.728206	-1.54106	-0.735886	-3.65041	-3.09152	-3.65041	0.187874	-3.65041	-3.65041
Arsk	1.25918	1.73718	1.71668	1.55986	1.48366	1.42969	1.12201	1.56257	1.21072	1.33166	1.5734	1.20988	2.09008	1.7312	1.82435	1.63053	1.87631	2.14487
Art1	-0.968453	-1.49872	-1.24559	-0.193685	-0.166197	-0.502659	-0.908707	-1.83017	-1.51069	-1.16738	-1.70878	-0.569496	-2.84082	-0.473565	0.892282	-0.417421	-0.754529	1.48231
Art3	0.576807	0.653213	1.49386	0.951597	1.35026	1.7346	-1.43102	-1.13915	-2.46293	-0.164777	-0.328804	-0.569496	0.862361	1.24979	2.89983	3.00959	1.47738	-0.0767101
Art5	1.3057	1.40005	1.03329	1.58191	0.767858	1.34776	0.707406	-0.128449	0.0883091	0.376602	0.320495	1.48853	2.94346	2.81768	3.07303	2.97931	2.80113	3.18446
Artn	-2.34156	-3.18301	-1.24559	-2.68663	-1.46627	-2.66284	-1.70769	-2.35968	-2.76156	-1.45804	-0.909957	-1.78906	-1.00218	-0.473565	-3.65041	1.24234	-1.42338	-3.65041
Arv1	2.39521	2.59007	2.03537	2.76088	2.35766	2.69037	2.50531	2.76277	2.80693	2.75308	2.36094	2.52247	2.61682	3.00539	2.10964	2.07242	2.58904	3.5346
Arvcf	6.42175	6.47811	6.39482	6.37169	6.14044	6.22317	6.4857	6.58809	6.46913	6.50442	6.44679	6.42268	5.86817	5.98081	6.02707	5.54847	5.74386	5.0809
Arx	-1.08365	-0.0539922	1.17664	0.28092	0.643026	1.13287	-1.19897	0.00174721	-0.684433	1.97771	1.05551	0.218105	-2.84082	-0.633022	-3.65041	-3.65041	-3.65041	-3.65041
Arxes1	1.65739	0.954797	1.09813	0.957232	1.22954	1.19831	1.37694	1.78262	1.78827	1.11067	1.90221	1.72045	2.31703	0.765399	1.60427	1.29246	1.31685	0.721163
Arxes2	2.16857	2.66822	2.50409	2.40452	2.75305	2.62323	2.74839	2.92145	2.76796	2.90007	2.60315	3.05203	0.613796	2.61077	-3.65041	0.738818	2.60824	-0.44124
As3mt	0.18722	-0.197836	-0.388676	-1.38687	-0.285215	0.535435	-0.594883	-0.487581	-0.942001	0.131159	-1.25477	-0.427092	0.483781	-1.70975	2.28168	-2.38716	-2.14408	-1.30274
Asah1	4.41526	4.48221	4.26614	4.29888	4.26042	4.6446	4.74808	4.69397	4.65025	4.76416	4.86202	4.93519	4.3674	4.30639	4.10489	4.67562	4.88133	4.24119
Asah2	2.6134	2.68199	2.98278	2.87691	2.44438	2.48484	2.34916	2.04974	1.67792	2.13274	2.15524	2.03539	3.45804	2.90736	3.04145	3.72064	3.20823	3.89195
Asap1	7.45214	7.45924	7.43324	7.39422	7.19935	7.33131	7.43468	7.29946	7.23218	7.34268	7.20644	7.38175	7.63208	7.59162	7.65919	7.7854	7.58376	7.64201
Asap2	4.51044	4.5193	4.36196	4.47099	4.39062	4.4259	4.47921	4.6153	4.70717	4.46813	4.74313	4.39204	4.1581	3.89822	3.74597	3.81797	4.01123	4.16684
Asap3	2.57594	2.76193	2.755	2.92802	3.07157	2.42302	2.32141	2.10873	1.55009	2.34371	2.09283	1.795	2.45275	2.86321	3.00917	2.45638	2.73913	3.09564
Asb1	3.22877	3.04362	3.49064	3.4014	3.61464	3.42284	2.78136	2.73245	2.69805	2.53786	3.03219	3.2135	3.70945	4.21276	4.85797	4.54077	4.30189	4.19148
Asb12	-3.65041	-3.65041	-3.65041	-3.65041	-3.65041	-1.86085	-3.65041	-3.65041	-3.65041	-3.65041	-3.65041	-3.65041	0.763941	0.483784	1.87897	2.03365	0.989464	3.10477
Asb13	0.522696	0.542883	0.949523	1.24211	0.552211	0.383583	0.26214	0.227898	0.0604285	-0.454861	0.183478	-0.367326	0.64178	-2.40425	0.683096	0.95342	-1.48125	1.9212
Asb14	-3.0727	-3.18301	-3.03033	-3.65041	-3.12127	-3.07372	-1.86885	-3.20507	-2.76156	-1.82243	-1.54106	-3.65041	0.212418	-1.70975	-3.65041	-3.65041	-0.0600335	-2.90052
Asb16	-0.968453	-0.474919	-0.097149	-0.132555	0.0943888	-0.280665	-0.908707	-0.375537	-0.607872	-0.53751	-1.13045	-0.427092	0.420574	-3.65041	-3.65041	-0.417421	1.27813	-3.65041
Asb17	-3.65041	-3.65041	-3.03033	-2.37205	-2.43057	-3.07372	-3.65041	-3.65041	-3.65041	-2.31113	-2.37498	-2.18802	2.93217	3.10352	4.93754	4.96834	4.61404	4.91169
Asb18	-2.89384	-2.2263	-1.57257	-2.11394	-2.43057	-2.40189	-2.92783	-3.20507	-2.76156	-3.05578	-3.0911	-2.74135	0.0296397	-3.09152	-0.109548	-0.506038	0.264396	-0.252149
Asb2	-2.34156	-1.37955	-0.559991	-2.11394	-0.110178	-0.864431	-1.70769	-1.83017	-2.76156	-0.302541	-0.909957	-1.62454	-2.32536	-1.54207	-0.573907	-0.782197	-3.65041	-3.65041
Asb3	2.89705	2.87471	2.90255	2.9843	3.01601	2.76785	2.82154	2.43496	2.86181	2.97875	2.77991	2.51278	2.90933	3.03222	3.33639	3.34657	2.656	3.47949
Asb4	-3.0727	-3.18301	-2.26587	-2.11394	-2.73497	-2.08204	-1.31034	-1.68951	-1.25577	-2.04619	-0.909957	-3.12543	-1.39837	-2.37576	-0.152728	-0.417421	-2.14408	-0.348576
Asb5	0.576807	0.234571	0.199988	-0.0739116	-0.634431	0.37054	0.0258031	0.734303	0.683235	0.662324	0.701234	1.02648	0.909163	-1.25584	0.892282	-0.0412639	1.40335	-3.65041
Asb6	3.99459	3.7971	3.91175	3.51751	3.63445	3.69066	4.01367	4.26667	3.80781	3.8955	4.09495	4.16181	3.48687	3.04479	3.18348	3.23906	2.11472	2.31191
Asb7	2.92041	3.034	2.87674	2.52039	2.60696	3.10621	3.04387	2.96626	2.80903	3.23488	2.99719	3.22541	3.33575	3.11736	2.5643	3.83216	3.44221	3.73023
Asb8	3.70723	3.71009	3.68543	3.7196	3.71147	3.71279	3.64411	3.54632	3.60281	3.66868	3.44171	3.79923	3.82441	3.93245	4.80041	4.59203	4.48776	4.7782
Asb9	2.89781	2.66129	2.6991	3.03181	2.45371	2.53441	2.86063	2.62206	2.82776	2.58745	2.5107	2.477	1.62145	2.05276	3.03345	3.00959	3.69827	3.79936
Ascc1	3.81166	3.7037	3.80501	3.99426	3.86259	3.52936	3.57568	3.31582	3.61524	3.51261	3.50538	3.6425	3.56421	3.91056	4.47686	4.22954	4.03142	3.70041
Ascc2	5.94705	5.99393	5.82845	5.86316	5.82198	5.75197	5.77607	5.84273	5.72472	5.78879	5.72667	5.68836	5.94303	5.869	5.79716	5.82468	5.69775	6.09647
Ascc3	6.43946	6.58952	6.54837	6.51385	6.66482	6.56906	6.32484	6.24667	6.31044	6.14819	6.38693	6.16734	7.25628	7.19932	7.11378	7.43949	7.15707	7.28481
Ascl1	-1.08365	-1.77138	-1.99605	-1.38687	-2.43057	-1.86085	-2.05031	-1.98603	-2.76156	-2.63594	-2.37498	-2.43832	0.135777	-3.65041	0.856435	-3.65041	-3.65041	-3.65041
Ascl2	2.02858	1.44918	1.95809	1.65308	2.20041	1.80092	1.71509	1.76194	1.82326	1.7871	2.0142	1.86589	1.78094	-0.473565	0.781954	-1.08939	1.55501	1.64139
Ascl4	-0.414473	-0.80276	-0.228316	-0.445469	-0.865317	-1.31995	-0.0113566	-0.256603	-0.103362	-1.29099	0.188261	0.269212	0.75372	0.82798	-1.72339	-3.65041	-0.325574	-3.65041
Asf1a	4.31678	4.30675	4.28777	4.30993	4.48184	4.27017	4.66789	4.70676	4.728	4.50757	4.42911	4.53267	4.2034	4.30639	3.79035	3.95135	3.65695	4.32993
Asf1b	4.55637	4.31118	4.36465	4.23826	4.99083	4.2421	4.70702	4.93293	4.90434	4.79383	4.83178	4.72608	4.5483	4.07118	4.44975	3.61955	4.11923	4.53977
Asgr2	-1.85864	-0.302374	-1.99605	-0.714399	-2.17934	-1.08623	-0.999124	-1.33487	-0.607872	-0.925568	-0.631865	-1.47687	-3.65041	-2.11808	-3.65041	-1.4802	-3.65041	0.627949
Ash1l	7.54977	7.7034	7.70472	7.69463	7.72396	7.71781	7.62983	7.5167	7.63907	7.46908	7.54791	7.48914	8.07551	8.22196	8.11381	8.20122	8.1187	8.37969
Ash2l	6.77549	6.78579	6.69818	6.91665	6.85646	6.64888	6.9217	6.9571	6.98328	6.88948	6.79631	6.97837	6.46863	6.48981	6.23688	6.29863	6.54634	6.39708
Asic1	0.584374	1.0869	1.43118	1.48771	1.54948	1.07777	0.701677	0.472094	-0.336761	0.292972	0.276253	0.87799	-2.28265	-2.6897	-0.152728	-2.88472	-1.21264	-0.815494
Asic2	-0.86178	-0.602597	-1.10626	-0.905709	-0.893409	-1.08623	-0.908707	-1.68951	-1.3776	-0.925568	-1.70878	-3.12543	-0.558353	-0.719886	1.46839	-3.65041	0.558115	-0.815494
Asl	3.56149	3.47771	3.46293	3.21759	3.43379	3.43333	3.59125	3.79466	3.65424	3.74059	3.51826	3.76588	3.25562	3.21894	3.53087	2.54175	3.49756	3.59418
Asna1	5.84345	5.82897	5.78771	5.92467	5.95504	5.63527	6.03434	6.18239	6.15241	6.05959	6.03951	5.94891	5.52909	5.3267	4.90281	4.80816	5.38753	5.12421
Asns	2.69344	2.64029	2.9116	3.23741	3.61879	2.60107	3.14021	3.14316	2.67449	3.04344	3.00669	3.07016	3.22819	1.92974	3.69208	3.83216	3.78522	2.93082
Asnsd1	6.31501	6.42558	6.40351	6.46426	6.0764	6.21126	6.35521	6.38389	6.39362	6.31955	6.37295	6.58491	7.00546	6.74317	7.38861	7.57032	7.30282	7.57504
Aspa	0.373449	0.836697	0.870744	0.739072	0.355379	0.785196	0.55369	0.489954	0.48775	-0.232015	0.445621	0.457256	1.03688	0.595928	0.781954	-2.38716	0.0462007	-1.67545
Aspg	1.57623	1.36635	1.47178	1.86425	0.991715	0.785196	1.10691	0.429538	0.133612	1.04969	0.829241	1.19013	0.602449	0.973496	-1.93324	1.30879	-0.174717	-0.0767101
Asph	3.9407	3.86836	3.87858	3.95642	4.11817	3.92949	4.03945	4.016	3.75805	3.77354	3.97621	3.84521	4.05417	4.12918	3.03345	3.74844	3.85776	4.08982
Asphd2	4.25855	4.22237	4.13814	3.99117	3.45715	3.91347	4.02919	3.61947	3.78811	3.81243	3.5896	3.52037	4.02843	4.23573	3.48524	4.29616	3.86722	3.8707
Aspm	6.66145	6.6538	6.84096	6.6437	7.10599	6.89307	7.39667	7.31932	7.48496	7.17563	7.26318	7.33383	6.63875	6.27695	6.06094	6.23992	6.30556	6.6172
Aspn	-1.49747	-3.18301	-3.65041	-2.11394	-2.43057	-1.86085	-3.65041	-1.83017	-2.76156	-0.454861	0.0843246	-0.646342	-3.65041	-3.65041	-3.65041	-3.65041	-3.65041	-3.65041
Aspscr1	5.76019	5.66442	5.67752	5.77826	5.60382	5.58546	5.90023	5.89442	5.9061	5.8349	5.73609	6.01129	5.79996	5.74079	6.18453	6.14421	5.92011	5.67841
Asrgl1	3.56197	3.45664	3.21643	3.47149	3.26983	3.72479	3.32718	3.33159	3.54152	3.54811	3.22375	3.33741	4.72873	4.76039	6.59601	6.46331	6.16526	6.66746
Ass1	0.679297	1.1849	1.44937	1.11175	2.535	1.9086	0.843711	0.603689	0.882157	1.33166	1.1808	1.21206	0.0548351	-3.65041	-2.99783	-3.65041	0.558115	-3.65041
Aste1	3.8237	4.09259	3.84849	4.1126	4.00889	3.96499	3.97649	3.80925	4.06182	3.73576	3.81469	3.98966	4.6239	4.05492	5.08616	4.7315	4.70969	4.57338
Astn1	0.751653	0.653213	0.732776	0.188123	0.432844	0.455342	-0.020798	0.330587	0.620971	0.283374	-0.328804	-0.569496	-1.94636	1.50091	-1.70186	1.79951	1.59406	-0.960363
Asxl1	7.87535	7.87393	7.81958	7.78231	7.69268	7.69341	7.83033	7.78827	7.72587	7.7704	7.71707	7.64872	7.77357	8.01769	7.65209	7.76554	7.73284	7.55931
Asxl2	5.03064	5.32878	5.39567	5.31089	5.71867	5.45639	5.33578	5.31081	5.41118	5.30091	5.32354	5.23544	6.03638	5.7874	5.60153	5.79122	5.87614	6.13888
Asxl3	4.39577	4.45882	4.33623	4.42522	4.354	4.39698	4.02976	3.63694	3.6012	3.62802	3.52111	3.45335	4.9804	4.87393	5.05131	4.92425	4.37608	4.42997
Asz1	5.8833	5.89989	5.74579	6.00083	5.69311	5.74672	6.04357	5.97867	5.99324	5.86518	5.90342	6.00031	6.00629	5.87457	5.62543	6.15	6.00506	5.81558
Atad1	5.06586	5.211	5.25961	5.43875	5.30738	5.04407	5.39289	5.25804	5.4836	5.2001	5.4122	5.61309	5.23053	5.52034	5.90528	5.96779	5.96989	5.92275
Atad2	7.59753	7.67018	7.52292	7.3703	7.34982	7.59437	8.02565	7.95061	7.90953	7.81724	7.83312	7.92789	7.64488	7.47696	7.43606	7.66563	7.53088	7.76167
Atad2b	5.14171	5.21349	5.32755	5.41987	5.42662	5.35809	4.90246	4.91747	5.08587	4.8942	4.7613	4.75345	5.7654	5.77415	5.35233	5.72493	5.60758	5.28752
Atad3a	6.17496	6.25787	6.01201	6.12571	5.84457	5.92215	6.31959	6.45538	6.27676	6.13432	6.21008	6.18727	5.38069	5.41191	5.18738	5.0621	5.35508	4.96707
Atad3aos	-0.210846	-1.49872	-0.471792	-0.394341	-0.285215	-0.424803	-0.594883	-0.812932	-1.15427	-0.376691	-0.549926	-0.904989	-3.65041	-0.551092	-0.573907	-3.65041	0.558115	-3.65041
Atad5	5.78411	5.94261	6.0326	5.73781	6.41858	6.05767	6.1786	6.16628	6.25515	6.00223	6.17293	6.10578	5.36881	5.13736	5.32947	5.47097	5.69387	5.23649
Atat1	3.33408	3.26051	3.0439	3.15399	2.92511	3.29579	3.25713	3.28589	2.92179	2.71877	3.05266	3.29745	3.62856	3.51267	3.34935	3.15215	4.06971	4.40209
Atcay	2.83258	2.36794	2.37921	2.58733	1.53375	2.12985	1.55907	0.776148	0.32543	1.73524	1.24878	0.869735	1.99132	2.52837	2.6495	2.03168	1.18818	-0.348576
Atcayos	-1.08365	-0.897846	-2.26587	-0.714399	-1.77919	-2.34341	-1.86885	-2.16079	-2.21564	-2.63594	-3.0911	-1.62454	-0.558353	0.631452	-1.70186	0.55939	-0.174717	-0.815494
Ate1	5.54208	5.60144	5.44649	5.46741	5.6654	5.57021	5.63373	5.69336	5.67196	5.56445	5.69131	5.55625	5.73795	5.56432	5.4815	5.72173	5.64568	5.79174
Atf1	5.6076	5.59445	5.4759	5.38554	5.9124	5.52127	5.80516	5.88039	5.75955	5.58828	5.60507	5.6751	5.37736	5.5156	5.46835	5.66658	5.29871	5.96949
Atf2	5.29499	5.38298	5.51514	5.41258	5.80878	5.52409	5.43979	5.26238	5.55632	5.28912	5.40952	5.3971	6.06663	5.88408	6.07407	6.16745	5.99614	6.34388
Atf3	-0.0266615	0.0345074	-0.388676	-1.0118	-2.73497	-0.97107	-0.743278	-1.05042	-1.3776	0.131159	-0.0784867	-0.496538	0.135777	0.858281	0.819675	-0.52907	-1.42338	-3.65041
Atf4	5.24827	5.41022	5.49121	5.40693	5.4139	5.37302	5.80224	5.75544	5.91513	5.65446	5.6267	5.88207	5.78749	5.94685	5.82398	5.59598	5.64821	6.28001
Atf5	0.883247	1.29648	1.53701	1.18562	1.11199	1.34776	0.588258	1.16323	1.29488	1.58707	1.08146	0.976101	1.12279	-1.0171	-1.5025	0.940903	0.878801	0.772498
Atf6	4.55637	4.452	4.58603	4.43611	5.08352	4.61449	4.50843	4.52145	4.63576	4.4599	4.56127	4.51513	4.73524	4.34435	4.61252	4.55555	4.40282	5.03386
Atf6b	4.58989	4.71944	4.55278	4.55724	5.0289	4.65113	4.83406	5.07541	5.01031	5.00219	5.14331	4.93519	3.99682	4.31461	4.57634	2.41173	4.06971	3.32395
Atf7	5.75433	5.78985	5.84346	5.81403	5.80305	5.88518	5.90499	5.84663	5.84357	5.88416	5.94949	5.87195	6.12442	6.14843	5.9377	5.92368	5.90977	5.82072
Atf7ip	7.18365	7.1499	7.00762	7.0962	7.03688	7.0332	7.30883	7.29198	7.24604	7.29544	7.17489	7.17334	6.94512	7.06319	6.56685	6.99047	6.96415	6.91084
Atf7ip2	4.14448	4.48044	4.69055	4.51726	4.73219	4.62391	4.39252	4.21032	4.53447	4.13448	4.5592	4.44972	5.4561	4.45655	5.29155	5.29569	5.31766	5.10681
Atg10	2.03412	2.01679	2.05331	2.30418	1.96123	2.30801	2.25938	1.87952	1.88152	1.96726	2.16982	2.21229	2.35302	2.36387	2.09125	2.56233	2.32349	1.66381
Atg101	4.86888	4.97562	4.88055	4.81752	4.57235	4.92274	4.89181	5.06911	5.19394	4.88014	5.0263	4.92858	4.71563	4.80346	4.76217	4.16822	4.67327	3.78807
Atg12	4.39039	4.46639	4.63874	4.38685	4.82921	4.63236	4.39074	4.37936	4.4842	4.1946	4.22778	4.32468	4.58444	4.68145	4.92613	5.21569	4.93278	4.71847
Atg13	4.29935	4.26871	4.43793	4.43888	4.44492	4.51922	4.19359	4.05651	4.20107	4.25478	4.22284	4.27866	4.52595	4.63648	4.40392	4.51988	4.19047	5.11045
Atg14	6.10746	6.00698	5.89112	5.89287	5.64814	5.87251	5.88119	5.86286	5.72934	5.8561	5.73895	5.69811	6.10256	6.4843	5.92272	6.2098	6.20465	6.29305
Atg16l1	6.39491	6.33374	6.30926	6.16314	6.07421	6.24217	6.33389	6.35113	6.4062	6.29558	6.32224	6.37535	6.2642	6.24505	6.02617	5.99819	5.7535	6.17239
Atg16l2	0.883247	1.28571	1.24591	2.16258	0.797449	1.36978	1.22944	0.657362	1.32253	1.1025	1.27374	0.218105	0.857596	-0.399993	1.93332	0.503742	-0.174717	-3.65041
Atg2a	6.66853	6.53633	6.57767	6.68747	6.40986	6.43617	6.38545	6.32779	6.30915	6.40211	6.28435	6.13391	6.40362	6.52677	6.38025	6.41887	6.18429	5.54235
Atg2b	6.77182	6.79615	6.76216	6.78951	6.88985	6.69919	6.84105	6.84802	6.83817	6.81523	6.83772	6.77279	6.81576	7.1653	6.91133	6.9847	7.02697	7.00385
Atg3	4.42846	4.34856	4.36495	4.49806	4.50668	4.38271	4.72884	4.59773	4.64615	4.56316	4.60015	4.67192	4.23589	4.21861	4.29766	4.12276	4.4683	3.94326
Atg4a	1.10988	1.06396	0.971713	1.58191	1.6372	1.23235	1.36248	1.27045	1.29488	1.48608	0.445621	1.12225	1.4421	0.444378	0.23002	0.898378	1.40335	1.09931
Atg4b	5.28777	5.29726	5.24829	5.10928	5.36546	5.21949	5.20836	5.30189	5.18455	5.28236	5.34016	5.19264	5.11076	5.36546	5.30524	5.04831	5.04402	4.6088
Atg4c	1.53777	1.79025	1.94212	1.68738	1.93351	1.57321	1.62715	1.63392	1.49908	1.88397	1.54011	1.03142	2.85179	2.52837	2.96777	2.52787	2.67434	2.51738
Atg4d	3.61834	3.44377	3.8502	3.50506	3.9853	3.5911	3.48269	3.427	3.63073	3.73664	3.61868	3.1855	3.26464	3.17146	3.36856	2.53483	3.37957	2.21403
Atg5	5.38981	5.16518	5.18356	5.35984	5.16991	5.02339	5.32697	5.29449	5.38285	5.13821	5.06094	5.11037	5.25565	5.31172	5.1834	5.18506	5.13411	5.1152
Atg7	3.49077	3.52354	3.38417	3.74954	3.41482	3.53424	3.39354	3.70511	3.60924	3.13634	3.44071	3.3274	3.25833	3.62047	4.05516	3.87116	3.57946	4.13465
Atg9a	3.73894	3.76674	3.81118	3.9298	3.59244	3.84871	3.49226	3.59802	3.42337	3.59494	3.29809	3.60941	7.82847	7.43551	8.62009	7.55478	7.67435	8.3685
Atg9b	-0.762454	-0.00906394	0.446255	0.325172	0.910091	0.0813724	-0.118775	-0.271572	-0.162369	-0.625183	0.0320694	0.302304	0.862361	-1.25584	0.113367	-1.08939	-2.14408	-1.75252
Athl1	0.969571	1.8167	1.49386	1.78567	1.22301	1.51513	2.11058	2.03967	1.5667	1.8696	1.54011	1.92019	1.2001	0.82798	0.819675	-1.72414	1.90483	-3.65041
Atic	6.09096	5.95038	6.05217	6.13592	6.13885	5.93448	6.17052	6.33053	6.40123	6.18224	6.36848	6.17148	5.59838	5.60543	5.23335	5.21807	5.58374	5.43239
Atl1	3.83206	3.77158	3.86255	4.03213	4.08795	3.71966	3.93893	3.60452	3.36378	3.64076	3.62795	3.61971	4.05781	4.02951	4.16181	4.81446	4.63121	3.98985
Atl2	5.32494	5.25897	5.15146	5.11874	5.49007	5.3692	5.49476	5.42681	5.53579	5.34036	5.34297	5.49215	5.83553	5.56328	5.48017	5.87557	5.78107	5.94834
Atl3	3.73299	3.75962	4.14548	3.89866	4.89159	4.33315	4.28263	4.1877	4.23004	4.25785	4.217	4.35949	7.4192	6.95865	8.49758	8.11367	7.96852	8.65325
Atm	7.30933	7.4243	7.54294	7.69181	7.75692	7.49825	7.6155	7.57441	7.61755	7.33013	7.46004	7.58594	8.07477	8.12906	7.75268	8.10942	8.03187	7.82342
Atmin	4.99489	5.10259	5.20546	4.79606	5.22675	4.99002	5.06776	5.12149	5.04332	4.91553	4.95967	5.08682	5.81371	5.72638	6.09219	6.04536	5.80188	6.26786
Atn1	3.65294	4.22965	4.29753	4.23247	4.24949	3.9435	3.62153	3.47188	3.6743	4.18077	4.01913	3.83288	5.06731	4.99257	2.84051	5.26276	4.59316	4.53674
Atoh8	5.99308	5.89989	5.52911	5.73063	5.01149	5.65781	4.97566	4.84328	4.83095	4.86615	4.80283	4.86598	6.41886	6.68576	6.26193	6.54225	6.08963	5.93943
Atox1	2.60413	2.28197	2.67997	2.39625	2.40648	2.33624	2.28355	2.26385	2.62855	2.37794	2.79567	2.65567	1.78094	2.32642	2.51801	3.10618	1.59055	1.39566
Atp10a	2.66784	2.66129	3.22635	3.10977	3.61089	3.03911	2.35829	2.5948	2.62061	2.59717	2.84193	2.77835	2.85059	0.973496	1.80568	2.03365	3.21963	2.5842
Atp10b	-3.65041	-3.65041	-3.03033	-3.08949	-3.65041	-2.08204	-3.65041	-2.16079	-3.65041	-3.65041	-1.89859	-3.65041	-0.734204	-2.6897	1.82064	1.34724	-2.14408	-3.65041
Atp10d	1.80395	2.18863	1.7148	2.2547	2.38715	2.13242	1.8507	1.82193	1.70818	1.68327	2.0142	1.90681	1.87824	1.81083	0.620357	2.11203	2.13893	0.286466
Atp11a	6.38709	6.34102	6.11662	6.25358	6.21497	6.13602	6.15861	6.26947	6.05981	6.01044	6.14714	6.11235	5.95144	6.10684	5.63339	5.90205	5.84299	5.26529
Atp11b	6.44603	6.60857	6.47613	6.3901	6.56065	6.61287	6.4493	6.54385	6.40129	6.25863	6.49469	6.48649	6.45686	6.26787	6.60751	6.77086	6.45997	6.69795
Atp11c	4.76658	4.76057	4.91776	4.83676	5.39237	5.03893	5.14235	5.03543	5.12551	4.84591	4.98223	5.01393	5.3456	4.97574	4.94182	4.72239	4.94451	4.83144
Atp12a	-0.582226	-1.26949	0.199988	-0.193685	0.963277	-0.502659	-0.743278	-1.33487	-0.218189	-0.302541	-1.25477	-0.427092	0.712094	-0.719886	-0.675202	-0.0412639	0.237739	0.220779
Atp13a1	5.977	6.06853	5.78994	5.82032	5.7604	5.72126	5.99389	6.12103	6.11542	5.89995	5.95695	6.02134	5.72656	5.51203	5.74298	5.55036	5.19022	4.87212
Atp13a2	6.07014	6.17153	6.0076	5.89287	5.72609	6.02769	6.07161	6.02547	5.86816	5.98827	5.97704	6.04742	5.59927	5.6943	5.48003	5.5853	5.32057	5.66488
Atp13a3	6.09386	6.13853	6.34726	6.14651	6.73846	6.40066	6.39258	6.4168	6.41843	6.25026	6.40643	6.30062	6.4076	6.09806	6.32313	6.60698	6.52008	6.73224
Atp13a4	-0.414473	-0.357627	-0.559991	-2.37205	-0.224479	0.451218	-2.7923	-3.65041	-3.13859	-1.16738	-1.54106	-1.78906	-1.6465	-3.65041	-1.32738	-0.52907	0.484441	-0.683854
Atp13a5	-1.34595	-0.982171	-0.979208	-2.37205	-1.96544	-1.08623	-1.86885	-1.33487	-2.21564	-1.45804	-0.71874	-1.78906	-0.558353	-1.54207	0.172872	-2.01789	-0.435689	-3.65041
Atp1a1	7.25888	7.18621	7.13449	7.1809	6.79645	7.08411	7.41727	7.43385	7.43324	7.3717	7.38305	7.42905	6.52691	6.4721	6.11038	5.67211	6.51431	5.02907
Atp1a2	1.84548	1.71057	2.05034	1.28082	2.08397	2.24628	0.10607	1.79704	1.21283	2.49692	1.86685	1.75821	2.15171	1.74099	2.40468	1.72116	2.26968	3.37088
Atp1a3	-1.66678	-1.49872	-1.10626	-0.324309	-0.110178	-1.86085	-1.31034	-1.98603	-0.942001	-1.3054	-1.70878	-3.12543	-3.65041	-3.65041	-3.65041	-0.313796	0.484441	-3.65041
Atp1a4	-3.65041	-3.18301	-3.65041	-3.65041	-3.65041	-3.65041	-3.65041	-3.65041	-3.65041	-3.65041	-3.65041	-3.65041	5.25542	5.61876	7.4864	7.34779	7.30817	7.50774
Atp1b1	4.3801	4.27554	4.2069	4.01129	4.17845	4.26136	4.35286	4.34092	4.30373	4.46839	4.44143	4.34195	3.79356	3.99822	3.79981	3.14307	4.01189	2.77935
Atp1b2	4.2907	4.36593	4.4549	4.14382	4.91034	4.64415	4.30642	4.17855	4.29877	4.74002	4.64651	4.62569	4.21787	4.05818	4.61467	4.45937	4.14934	4.5057
Atp1b3	5.51387	5.59071	5.63594	5.41719	5.62667	5.6273	5.48437	5.5204	5.58085	5.27314	5.40964	5.60171	8.11666	7.70613	8.74935	8.11599	8.36024	9.15903
Atp1b4	-0.422034	-0.148278	-1.10626	-1.89508	-0.166197	-0.0295098	-1.31034	-1.68951	-2.46293	-3.05578	-2.37498	-0.904989	-2.84082	-0.263231	-1.32738	-2.01789	-1.73919	-3.65041
Atp2a1	0.576807	-0.148278	-0.310088	0.640948	-0.110178	0.0269963	0.0709459	-0.812932	0.220161	0.283374	-0.549926	-1.34292	1.27349	1.27247	0.961409	0.385558	1.72459	-3.65041
Atp2a2	6.50454	6.44059	6.55377	6.55584	7.3477	6.61794	6.57361	6.64968	6.7579	6.67413	6.61503	6.54707	6.26667	6.13959	6.22287	5.81471	6.47918	6.12267
Atp2a3	0.65075	0.0345074	0.400251	-0.193685	0.186732	0.495944	-0.223893	0.830896	-0.765285	1.39988	0.632704	0.42005	0.602449	-2.37576	0.28499	-1.08939	-0.754529	0.349292
Atp2b1	7.11449	7.10931	7.0046	6.857	7.00537	7.01205	7.09929	7.24622	7.26976	7.02951	7.16104	7.15148	6.79184	6.93707	6.68102	6.81661	6.45889	6.75996
Atp2b2	-0.146803	0.596197	-0.164696	-0.0739116	0.230778	-0.765134	-0.0689548	0.117335	0.379085	-0.232015	-0.137113	0.457256	-0.838592	0.945544	1.72846	1.13654	-3.65041	-0.563228
Atp2b3	-0.210846	0.680897	-0.30246	0.168825	-1.19755	0.0813724	-0.279472	-0.540987	-0.571063	-0.589472	-0.0166354	-0.427092	-0.179701	1.33844	0.662485	0.55939	-0.754529	0.817632
Atp2b4	5.6864	5.62675	5.43883	5.58673	5.43818	5.69633	6.15854	6.11529	5.96697	6.29938	6.02788	6.06516	4.87383	5.08243	5.08015	4.6617	4.77719	5.08159
Atp2c1	5.70713	5.82191	5.71547	5.57784	6.15337	5.75302	5.92334	5.99054	5.96384	5.79419	5.77318	5.871	5.84864	6.01996	5.91381	6.1756	6.11427	6.20343
Atp4a	0.236079	1.04064	0.35273	0.60191	0.47007	0.535435	0.732911	-0.128449	-0.108627	0.330741	0.918303	0.218105	-0.122095	1.33844	2.21247	-1.08939	0.484441	-0.451914
Atp5a1	7.92787	7.90451	7.90466	7.9031	7.9858	7.77816	8.35743	8.49996	8.54444	8.30449	8.32433	8.37383	7.10801	7.26501	6.92718	6.82728	7.00729	6.98808
Atp5b	8.50731	8.46644	8.31489	8.21233	8.23169	8.1464	8.65422	8.87607	8.72803	8.66514	8.65616	8.66346	7.51124	7.78758	7.25	7.06812	7.33527	6.89573
Atp5c1	6.5188	6.39582	6.37124	6.47663	6.65505	6.356	6.75359	6.86935	6.93476	6.72377	6.63652	6.70524	6.36846	6.44989	6.3929	6.28807	6.39624	6.17336
Atp5d	6.05898	5.89834	5.96814	6.00738	5.92779	5.86856	6.19844	6.32126	6.36239	6.27317	6.33207	6.38992	5.21874	5.03828	5.18358	4.94764	4.6774	4.51566
Atp5e	4.88409	4.85016	4.78532	4.68159	4.72451	4.71701	4.75501	5.14634	5.12691	5.04009	5.05441	5.06137	4.26766	3.88504	4.6567	4.58166	4.41527	4.88543
Atp5f1	5.62834	5.58551	5.502	5.64626	6.18492	5.58934	5.95935	6.23629	6.21171	5.94849	5.94083	5.96256	5.19273	5.07986	4.63676	4.68409	5.224	5.681
Atp5g1	4.68798	4.67057	4.77904	4.83714	4.59527	4.6527	5.17231	5.26433	5.38765	5.09685	5.22384	5.1831	4.34757	4.16991	4.34208	4.40269	3.64178	3.77668
Atp5g2	3.54704	3.75017	3.77378	3.82737	3.86259	3.887	3.95528	3.96103	4.31115	4.07869	4.05263	4.2993	3.8842	4.20688	3.73713	3.89839	3.7305	3.28431
Atp5g3	4.87081	4.71108	4.83567	4.85366	4.66776	4.72365	4.99056	5.03796	5.0727	4.84795	4.98033	5.00909	4.28595	3.67978	4.03044	3.95135	4.03723	4.07967
Atp5h	6.25944	6.13859	5.93009	5.87298	5.84475	5.9467	6.42587	6.68379	6.48243	6.15824	6.32367	6.63574	5.38876	5.37243	5.02086	5.44351	5.60171	5.28511
Atp5j	6.1351	6.18113	5.94789	5.91004	5.89523	5.82699	6.35012	6.58234	6.36974	6.06406	6.25266	6.43788	5.93458	5.7417	5.88441	5.76098	6.04868	6.04403
Atp5j2	4.86616	4.74557	4.72338	4.73976	4.89108	4.88502	5.10621	5.25902	5.11029	5.06988	4.92356	4.97678	4.49407	4.499	4.44674	4.31204	3.64855	4.34427
Atp5k	5.01969	4.68397	4.75137	4.97684	5.0625	4.73621	4.75501	5.11767	5.1926	5.23786	4.8413	4.95467	4.93786	5.18745	4.80746	4.53731	5.27459	5.51521
Atp5l	4.19849	4.07601	4.20991	4.13515	4.41969	4.23911	4.36967	4.55754	4.6005	4.49124	4.44168	4.46487	4.31622	4.16507	3.99214	4.22653	3.58387	2.26053
Atp5o	6.21846	6.21721	6.26719	6.35043	6.32897	6.14443	6.50232	6.67332	6.76372	6.61402	6.59924	6.71962	5.76365	5.81005	5.80764	5.63374	5.41555	5.91238
Atp5s	1.55713	1.6018	1.5156	1.97672	2.0239	1.45462	1.64218	1.66045	1.33422	1.44362	1.22802	1.48853	1.92454	2.39003	0.0513017	2.14696	2.4411	2.12706
Atp5sl	4.81381	4.52294	4.49047	4.66425	4.43719	4.464	4.65794	4.5593	4.56104	4.54017	4.52628	4.56924	4.18449	4.45184	4.27747	4.48833	3.80805	4.36304
Atp6ap1	3.60352	3.40902	3.54503	3.42701	3.63199	3.49472	3.20746	3.55695	3.33885	3.75325	3.66831	3.78137	3.30895	3.57421	3.85535	3.26524	2.9316	3.09564
Atp6ap1l	-3.65041	-3.18301	-3.03033	-3.08949	-3.12127	-2.34341	-3.65041	-3.65041	-3.13859	-3.65041	-3.65041	-1.34292	-2.84082	0.31926	2.28168	1.17267	-0.0600335	2.82427
Atp6ap2	3.51275	3.42138	3.3824	3.21935	3.86259	3.56319	3.7454	3.67907	3.76311	3.79607	3.7913	3.9504	3.6145	3.70501	3.21426	3.47511	3.48817	3.30822
Atp6v0a1	3.66815	3.76027	3.73214	3.29361	4.19827	3.8122	3.72789	3.95863	3.8127	3.66776	3.78737	3.88706	3.39285	3.47014	2.55202	2.47097	2.87507	1.39566
Atp6v0a2	4.84918	4.81764	4.97753	4.85743	5.00342	4.79209	5.13573	5.19024	4.97931	5.16899	5.18727	5.04466	4.71826	4.45952	4.11175	4.43614	4.73929	4.69205
Atp6v0b	3.14809	3.35419	3.31519	3.57086	3.83075	3.62032	3.23201	3.41615	3.57064	3.65944	3.69334	3.38211	3.31765	2.98493	2.38594	3.76924	2.69081	2.3276
Atp6v0c	4.15786	4.00878	4.47418	4.15919	5.0289	4.38054	4.17252	4.38533	4.17205	4.37263	4.32301	4.36831	4.78	4.1681	4.20841	4.01692	4.26936	3.3852
Atp6v0d1	5.24365	5.18223	5.4438	5.48702	5.35293	5.24204	5.28568	5.1834	5.19928	5.13821	5.34686	5.08087	5.03338	5.29659	5.04892	4.97347	5.12201	4.77248
Atp6v0e	2.64992	2.74236	2.38158	2.2547	2.87741	3.0253	2.59304	2.65541	2.67065	2.36662	2.72336	2.84303	3.0621	2.5094	2.89895	2.78291	3.18517	3.03003
Atp6v0e2	2.01605	1.66138	1.83726	1.50897	1.73219	1.80416	1.82194	1.53559	1.7826	1.94308	1.64125	1.54146	1.83769	2.60899	2.94405	1.94031	-0.29931	-1.20923
Atp6v1a	5.10897	5.22211	5.05937	5.14042	5.44415	5.19627	5.40153	5.38775	5.31133	5.3101	5.27967	5.22239	4.87412	4.63407	4.76652	4.8233	4.98213	5.10386
Atp6v1b2	6.6286	6.55814	6.45786	6.52047	5.99629	6.37925	6.73126	6.60266	6.60098	6.66948	6.63373	6.76294	6.33671	6.29381	6.01391	6.04292	5.74957	5.27341
Atp6v1c1	4.56644	4.53834	4.53399	4.51249	4.82131	4.50462	4.71628	4.68285	4.54478	4.49748	4.7709	4.38409	4.48715	4.39174	4.34046	4.78529	4.7105	4.52284
Atp6v1c2	0.236079	0.376776	-0.090565	-0.324309	1.33015	-0.584956	0.0709459	0.195609	0.800239	0.0257271	-0.072753	0.178551	0.954494	-0.551092	-1.17123	1.70398	-0.586318	-2.40958
Atp6v1d	5.00954	5.02829	5.11223	5.06446	5.3316	5.04424	5.22056	5.16499	5.03036	5.04826	4.94474	4.95125	5.17177	5.09727	5.36195	5.40852	4.98848	5.06461
Atp6v1e1	5.00708	4.96045	4.95384	4.8948	4.92733	4.92701	5.19185	5.15208	5.11806	5.21453	5.14038	5.23303	5.38649	5.48145	5.02349	5.64841	5.23527	5.32512
Atp6v1e2	-3.65041	-3.65041	-3.65041	-2.11394	-2.73497	-3.65041	-3.65041	-2.86527	-3.65041	-3.65041	-3.65041	-3.65041	-0.0309192	0.362183	2.70094	3.40089	3.80048	2.96131
Atp6v1f	5.25998	5.08845	4.97968	5.09657	4.77744	4.72984	4.98173	5.30609	5.28836	5.33252	5.11218	5.13497	4.99322	5.46849	4.69779	5.01636	4.89916	4.79523
Atp6v1g1	4.81361	4.90987	4.77635	4.71938	4.8159	4.80245	4.8717	4.96919	4.86358	4.82104	4.88927	4.93519	4.45675	4.4674	4.5955	4.82812	4.23045	3.98886
Atp6v1g2	-0.507932	-0.810449	-0.862444	-2.23723	-0.715699	-0.155906	-1.72302	-1.56137	-0.412883	-1.62876	-1.70878	-1.34292	-1.00218	-0.250241	-2.55014	-0.882442	-2.14408	-0.0767101
Atp6v1h	5.01445	5.1091	5.03718	5.07308	5.42461	5.33604	5.27028	5.20766	5.32873	5.18035	5.22806	5.27361	5.51648	5.22063	5.30823	5.44517	5.35998	5.44053
Atp7a	4.89002	4.77509	5.0941	4.80956	5.29952	5.03549	4.98748	4.99938	5.15451	4.98194	5.05735	5.10452	4.69907	4.688	4.52017	4.24107	4.5346	4.80395
Atp7b	3.41535	3.2191	2.99057	3.3536	3.26931	3.49472	2.68302	2.65541	2.54718	2.97055	2.61207	2.38345	3.36878	4.01176	3.72724	3.23137	3.29698	3.02041
Atp8a1	3.2879	2.95002	3.0364	2.89904	3.22044	3.16215	3.21753	3.66309	3.18111	3.12631	3.38503	3.3724	2.9333	3.35797	2.51801	3.07883	2.81773	3.46538
Atp8a2	3.996	4.17107	3.97236	4.05563	3.66004	3.9851	3.42039	3.31122	3.39945	3.04982	3.07285	2.88664	4.91798	4.57555	5.42893	5.4697	5.45466	5.36424
Atp8b1	-1.66678	-0.982171	-1.10626	-1.89508	-0.893409	-1.86085	-0.999124	-1.56137	-1.0392	-1.45804	-1.89859	-1.78906	0.81399	-0.911079	0.662485	-2.88472	0.0462007	-3.65041
Atp8b2	6.63841	6.66502	6.56215	6.41264	6.26349	6.61466	6.52521	6.43713	6.43566	6.62759	6.54556	6.51489	6.64567	6.55306	6.23766	6.64308	6.62119	5.95593
Atp8b3	2.09631	2.02546	2.45092	3.36424	2.87047	2.11949	2.09973	1.99867	1.58313	2.2848	1.82753	1.97253	6.99255	7.1322	9.03192	9.00835	8.6223	9.26287
Atp8b4	-0.277865	-1.16722	-2.26587	-0.467948	-0.801819	-0.97107	-0.823623	-1.13915	-0.276257	-1.62876	-0.472391	-1.97479	0.483781	-3.09152	-1.93324	-1.72414	-3.65041	-3.65041
Atp8b5	3.04218	3.09082	3.02128	3.28859	2.73175	3.21358	2.98377	2.46612	2.85506	2.6448	2.95149	2.92499	4.14545	3.77021	3.69208	4.18601	3.64939	3.65139
Atp9a	7.00682	6.95382	6.74592	6.66962	6.27996	6.67503	6.89559	7.00877	6.92509	6.96708	6.92233	6.92322	6.47039	6.88195	6.71651	6.32174	6.44317	6.0104
Atp9b	6.08096	6.19692	5.99837	5.78798	5.77915	5.95301	5.93864	5.95816	5.88067	5.65097	5.92507	5.80218	6.28995	6.21478	6.40054	6.34657	6.34108	6.36237
Atpaf1	4.59012	4.46659	4.08461	4.27961	4.03708	4.07427	4.34622	4.53996	4.39702	4.37827	4.40363	4.26456	3.38128	3.85717	3.49983	3.13942	3.34773	3.47245
Atpaf2	3.75243	3.62358	3.60609	3.6677	3.93527	3.62261	3.71657	3.97616	3.8827	3.90101	3.81082	3.89894	3.30633	3.23577	3.2705	2.90608	3.54363	3.66504
Atpif1	7.64684	7.6064	7.34648	7.28045	6.88439	7.13195	7.89216	7.97704	7.68363	7.62363	7.67667	7.84881	6.86481	6.97473	6.55676	6.8936	7.05738	6.79776
Atr	6.97739	7.02916	7.27889	7.29668	7.66986	7.20922	7.10619	6.89928	7.09679	6.98241	6.99306	7.04048	7.46103	7.49355	7.45124	7.43065	7.49826	7.58033
Atraid	1.7545	1.85366	1.94051	1.84766	2.13238	2.28965	1.71509	1.66045	2.13311	1.77002	1.71602	1.54146	2.54455	2.28241	2.29647	2.20045	1.62525	2.48976
Atrip	3.79626	3.95396	4.02938	4.03546	4.00921	3.9851	3.76819	3.7699	3.67354	3.75456	3.93162	3.56323	4.17447	4.09077	4.15482	3.99842	3.97605	3.40011
Atrn	5.64415	5.69155	5.71887	5.67743	6.10811	5.86022	5.71561	5.58976	5.79329	5.64231	5.7276	5.72219	6.10583	6.00039	6.02919	6.10372	6.11533	6.29704
Atrnl1	3.90148	4.43645	4.16625	3.69452	3.71922	4.19509	3.63324	3.52879	3.35806	3.40053	3.70632	3.28198	4.96857	4.40719	4.79568	4.94503	4.67327	4.90124
Atrx	7.3068	7.50862	7.24488	7.30206	7.28024	7.43564	7.55621	7.53921	7.62213	7.35314	7.29841	7.32781	7.69035	7.95207	7.70495	8.10276	7.73775	8.08691
Atxn1	3.27334	3.34859	2.9384	2.9107	2.88432	3.23772	1.99354	1.64592	1.96785	1.86318	2.26232	1.58749	4.77179	4.91162	4.68405	4.71352	4.74443	5.22753
Atxn10	5.25258	5.19908	5.37708	5.14366	5.51977	5.36359	5.45168	5.48373	5.6132	5.51276	5.58764	5.61618	5.16937	4.84566	5.06864	4.97091	4.77333	5.26732
Atxn1l	4.99133	5.10387	5.18016	5.25508	5.05364	5.1623	4.88709	5.00599	5.10433	5.09942	4.93142	5.05228	5.17656	5.21698	5.63207	5.18947	5.22739	5.25712
Atxn2	6.55295	6.65463	6.53313	6.51999	6.48884	6.70385	6.6621	6.7173	6.71798	6.61683	6.59536	6.65053	6.44282	6.76427	6.40613	6.32566	6.52698	6.73746
Atxn2l	7.6606	7.65933	7.65639	7.71792	7.71877	7.67117	7.78005	7.89683	7.87296	7.81094	7.78103	7.79124	7.5361	7.47601	7.55234	7.47089	7.46543	7.27022
Atxn3	4.37329	4.29806	4.39136	4.57108	4.86022	4.41721	4.51253	4.43054	4.63832	4.38081	4.43138	4.44556	5.59677	5.42866	5.81361	5.84455	5.80567	6.00065
Atxn7	5.05212	5.05855	5.11294	5.30178	5.23718	5.07472	5.06316	5.04766	4.94541	4.88966	4.85772	5.00297	5.70102	5.73028	5.61487	5.54675	5.65032	5.70462
Atxn7l1	3.67171	3.79203	3.52855	3.66942	3.1642	3.72906	3.31925	3.11993	3.0829	3.22989	3.2044	3.12263	4.9519	4.27557	5.18882	5.40453	5.08479	4.78105
Atxn7l2	4.48262	4.48241	4.25939	4.52677	4.24734	4.302	4.60559	4.48351	4.48289	4.48131	4.49043	4.45478	4.13613	4.43259	3.88234	4.42907	4.13135	3.56138
Atxn7l3	5.75402	5.78818	5.74579	5.76014	5.6673	5.61341	5.79973	5.90853	5.77554	5.86719	5.7653	5.79484	5.24657	5.69839	5.28297	4.91334	5.19917	4.80647
Atxn7l3b	5.61662	5.46797	5.64213	5.52665	5.51421	5.56307	5.93887	5.93254	5.91594	5.80723	5.6818	5.73739	5.07733	5.0065	4.83995	4.84221	5.03114	4.80926
Auh	3.50679	3.34557	3.26409	3.17772	2.81802	3.40696	3.14127	3.47525	3.1956	3.33351	3.19076	3.17326	3.49916	3.53301	3.84396	3.76806	3.48061	3.68284
Aunip	3.99671	3.80781	3.89899	3.69452	3.96719	4.05606	4.16525	4.21032	4.2456	4.20481	4.18146	3.99852	3.64938	3.09718	3.17841	3.12474	3.7542	2.98128
Aup1	4.26504	4.13974	4.08169	4.26832	4.73047	4.23402	4.37553	4.47045	4.38302	4.40618	4.32979	4.27606	3.59317	4.31461	4.58458	4.31326	4.36996	4.71102
Aurka	4.45708	4.15734	4.58655	4.24231	4.99913	4.41747	5.30234	5.27209	5.38402	5.16948	4.94915	5.05076	3.89004	3.95681	3.74205	3.23991	4.25281	4.22076
Aurkaip1	5.70279	5.68182	5.6931	5.74495	5.57207	5.48454	5.94631	6.08047	5.82565	5.96884	6.00434	5.95867	4.73199	5.33076	5.27959	4.88067	5.05042	5.08552
Aurkb	4.78803	4.72095	4.77161	4.84057	4.97958	4.63962	5.29522	5.45256	5.36135	5.16753	5.11642	5.37236	3.80598	3.661	3.78034	3.62543	3.75342	3.69438
Aurkc	0.18722	0.293146	0.150824	0.489739	0.794517	0.133773	-0.0113566	0.30391	0.133612	0.624811	0.363421	-0.867704	0.420574	-0.263231	0.620357	0.115465	-1.73919	1.69075
Auts2	7.20271	7.348	7.22362	7.26043	7.05816	7.11641	6.97061	6.93163	6.90056	7.08685	6.94587	6.90764	7.42389	7.55534	7.28097	7.33962	7.09158	7.54403
Aven	3.55187	3.2191	3.49064	3.41119	3.10153	3.37466	3.43168	3.37308	3.06255	3.29104	3.01345	3.19655	3.8238	3.50407	5.16904	4.6598	4.21914	5.4123
Avil	-2.34156	-2.10788	-1.24559	-1.0118	-2.73497	-3.65041	-1.43102	-1.68951	-1.82053	-1.82243	-1.54106	-2.18802	-0.122095	-3.65041	-0.0814637	-1.72414	-3.65041	-3.65041
Avl9	5.06502	5.2227	5.20228	4.9975	5.34794	5.22855	5.00808	5.07541	5.11411	4.81293	5.07715	5.0416	5.64768	5.45616	5.39028	5.93398	5.67743	5.61126
Avpi1	2.24695	2.05749	2.05034	2.14787	2.20041	1.96898	2.09973	1.93491	2.05285	2.09209	2.33852	1.9466	1.53456	0.631452	2.01526	0.98221	0.628209	0.00360757
AW011738	-3.27691	-3.65041	-3.65041	-3.08949	-3.65041	-1.86085	-3.15847	-2.16079	-3.65041	-2.56486	-2.11721	-1.97479	-1.6465	-3.65041	-0.306776	0.809372	-3.65041	0.409495
Axdnd1	2.02858	1.67108	1.84243	2.39625	1.87919	1.81863	1.51728	1.47859	1.19156	1.18472	1.36106	0.950236	4.81698	4.89235	5.89758	5.73252	5.78721	6.30003
Axin1	6.81054	6.61172	6.70091	6.45738	6.73182	6.52309	6.57208	6.726	6.74888	6.55827	6.63433	6.67595	6.06301	6.29513	5.81128	5.7369	5.76929	5.93688
Axin2	4.97343	4.83792	4.8972	4.95078	4.86389	4.60547	4.68414	4.73667	4.60653	4.66831	4.53382	4.74708	4.48406	4.87189	3.62495	3.96739	4.31257	2.57108
Axl	3.90526	3.85718	4.00308	2.8917	3.90058	4.21347	3.29567	3.64958	3.3046	4.33247	4.07927	4.20647	2.43687	2.93605	2.21247	1.13654	3.48817	1.205
Azi2	5.48359	5.43278	5.40341	5.53821	5.6681	5.56653	5.47601	5.46917	5.46234	5.32084	5.36704	5.33187	5.5477	5.68799	5.64723	5.49382	5.81152	5.72949
Azin1	5.86497	5.9043	6.10251	6.07324	6.33907	6.15516	6.03641	5.92839	6.03174	5.99572	5.89987	6.03909	6.03414	5.82939	6.13583	5.81756	6.42618	6.14708
Azin2	1.47809	1.29827	1.89313	1.81855	2.2864	1.45462	1.98766	2.01829	2.11063	1.96275	1.78237	1.9466	7.84527	7.48244	8.46152	7.13255	7.84614	8.33697
B130006D01Rik	1.02066	1.43299	1.2511	0.824794	1.41277	1.13287	1.07625	0.881389	1.1303	0.86897	1.07372	1.01405	1.43252	0.403866	1.92296	2.14696	1.9328	1.76175
B230217O12Rik	-0.499908	0.234571	0.695167	0.28092	-0.557497	-0.0295098	0.114719	0.195609	-0.108627	-1.3054	-0.328804	0.34263	-1.18672	0.631452	-1.70186	-1.2716	-3.65041	-0.252149
B230354K17Rik	5.28458	5.49346	5.36351	5.44038	5.73079	5.48365	5.56459	5.39596	5.50822	5.27829	5.33854	5.21277	5.07246	5.38718	5.38824	5.44738	5.2735	5.56254
B2m	2.23498	2.26378	2.7911	2.35415	2.23326	2.84846	2.2348	2.62206	2.33084	2.09209	2.42211	2.04763	2.80182	2.74656	1.72846	2.12868	3.2753	1.30348
B330016D10Rik	0.721087	-0.0539922	0.145256	0.528107	0.141299	0.133773	0.0258031	0.195609	-0.336761	0.283374	1.00219	0.0333558	1.94714	2.0658	1.82435	1.37231	1.40335	-3.65041
B3galnt1	2.161	2.15941	2.30874	2.52514	2.40648	2.39109	2.68302	2.24644	2.65209	2.19806	2.5107	2.40265	2.17488	2.19013	2.15461	2.78291	1.96024	-1.75252
B3galnt2	4.28375	4.29873	4.46527	4.43484	4.52072	4.33957	4.13528	4.07191	4.21246	4.05244	4.0608	4.18889	4.26181	4.32387	4.04922	3.96223	3.9881	3.57459
B3galt1	2.29386	2.19824	2.12295	1.93592	2.25368	1.95449	1.68492	1.60689	1.78117	1.60644	1.61307	1.31698	2.58835	1.88629	1.09046	1.75253	1.04177	-1.12142
B3galt4	0.136648	0.506213	0.576073	1.08626	0.355379	0.647807	0.61898	1.18166	1.23378	1.28432	0.523389	0.662343	1.59306	0.82798	0.961409	0.44586	-1.73919	-0.563228
B3galt5	-2.6613	-3.18301	-2.59805	-3.65041	-2.43057	-2.66284	-2.7923	-2.16079	-2.46293	-2.04619	-2.37498	-3.65041	-3.65041	-0.551092	1.53793	0.385558	0.0462007	-1.51017
B3galt6	2.36148	1.90151	2.21884	2.09773	2.31737	2.02554	2.62366	2.62206	2.69049	2.06433	2.64724	2.52159	1.16196	1.22675	2.34772	-0.217118	0.0462007	-0.960363
B3gat1	-0.968453	-0.363271	-0.480373	-0.257519	-0.893409	0.233189	-0.667174	-0.673872	-1.3776	-1.16738	-0.549926	-0.178576	0.954494	0.945544	0.819675	0.256823	-3.65041	0.945136
B3gat3	2.89781	2.66129	2.66059	2.70336	2.63673	2.61035	2.98377	2.98423	2.96567	3.24851	2.97936	3.13474	1.67659	2.49982	2.2544	2.8402	1.40335	2.3276
B3glct	1.05647	1.29648	0.874114	1.60003	1.98585	1.18347	1.50088	1.67353	1.37252	1.15871	1.57705	1.21206	1.34332	2.01291	-0.573907	1.62793	0.758939	2.54448
B3gnt2	3.30059	3.21768	3.10254	2.9136	1.49454	2.93221	2.2749	2.2403	2.92502	2.96305	2.77991	3.00255	2.40293	3.79235	2.23917	3.51787	2.29791	3.10477
B3gnt5	2.00058	2.19824	2.151	2.59005	1.82275	2.38028	2.0888	2.23766	2.84828	2.02311	2.31684	2.44957	3.12293	2.10424	1.18019	2.34995	1.65913	2.10901
B3gnt7	1.88278	2.17798	2.19208	2.6865	1.73372	1.92505	2.56175	2.45783	2.36922	2.27272	2.15401	2.25095	1.23726	1.61178	2.18383	1.40306	1.98716	1.1354
B3gnt8	-0.582226	-1.09972	-0.164696	-0.0739116	0.302701	-0.149629	-0.118775	-1.44368	-0.108627	0.0766301	-0.398812	-0.236808	-0.558353	-0.0233629	-2.1789	0.256823	-0.944972	-0.563228
B3gnt9	-1.66678	-1.37955	-0.653935	-0.394341	-0.224479	-0.672234	-1.31034	-1.56137	-3.65041	-0.625183	-0.631865	-1.1074	-0.838592	-3.65041	-0.152728	-1.72414	0.145146	-3.65041
B3gntl1	4.52869	4.92616	4.55409	4.82813	4.43883	4.56191	4.64661	4.54068	4.69721	4.44383	4.49212	4.52546	4.65032	4.37873	4.7229	4.46812	4.32318	4.00846
B430218F22Rik	0.80768	0.644803	0.508293	0.873288	0.860487	0.925571	0.90732	1.0534	1.68706	0.72394	1.03442	0.338648	1.82554	-0.995265	1.99067	-0.428205	1.02107	2.79974
B430305J03Rik	-2.34156	-3.18301	-1.57257	-2.11394	-2.43057	-1.49987	-1.09559	-1.33487	-3.13859	-2.63594	-1.70878	-1.22036	-3.65041	-3.65041	-0.390442	-0.417421	-1.73919	-0.451914
B4galnt1	1.98637	1.72659	2.05034	1.75365	1.62404	2.26754	1.74325	1.60689	1.87753	1.68327	1.1808	1.68951	1.75555	2.1293	1.87897	1.06144	2.16274	-2.90052
B4galnt2	-2.07999	-2.54753	-2.26587	-1.70508	-1.46627	-2.66284	-1.70769	-2.35968	-1.65731	-3.05578	-3.0911	-1.78906	-1.39837	0.083104	-3.65041	-2.01789	0.145146	-1.51017
B4galnt3	2.94265	2.66129	2.46216	3.12862	3.171	2.44392	2.97192	3.0459	3.34849	3.15949	3.05332	2.94478	2.72542	2.14167	2.78915	1.20793	2.75488	0.98525
B4galnt4	4.61527	4.67385	4.36495	4.62075	4.10669	4.19509	4.74285	4.75986	4.6809	4.73585	4.57754	4.50651	3.51967	4.31188	3.43082	3.62608	4.05706	4.66545
B4galt1	4.70933	4.66677	4.54487	4.44139	4.10077	4.81253	5.19683	5.22176	5.15739	5.13321	5.32531	5.41222	4.18924	4.49418	4.05832	3.80364	4.11314	3.33175
B4galt2	4.20218	4.28143	4.33439	4.31186	4.271	4.09622	4.15166	4.1977	4.01357	4.16551	4.20643	4.09256	4.68199	4.16082	4.70058	3.76096	4.18	4.85599
B4galt3	3.17403	3.07526	3.09606	3.14106	2.79253	3.09964	3.27171	3.49233	3.17462	3.16668	3.35928	3.22864	3.20024	2.67261	2.81739	3.13393	2.55525	0.409495
B4galt4	3.35026	3.26143	3.1097	3.24203	3.08363	3.1251	3.30042	3.49602	3.15882	3.27841	3.02753	3.11158	2.5593	2.49018	1.60427	1.75253	2.51696	0.861398
B4galt5	4.95166	4.98398	4.92793	4.98376	4.93218	4.85996	4.86963	4.93578	5.00575	5.02037	4.97359	4.95808	4.62741	4.73162	4.09339	4.59836	4.57907	4.21655
B4galt6	2.63997	2.16921	2.70762	2.90269	2.1347	2.45117	2.17713	2.28531	2.29838	2.13408	2.52116	2.11554	1.46421	1.8293	1.48491	2.15782	1.90765	2.23414
B4galt7	2.02997	1.61621	1.87811	1.40971	1.97294	2.09459	1.71509	1.64725	1.70668	1.96275	1.82753	1.37646	1.6793	1.64692	-0.152728	1.34407	1.65913	1.59029
B4gat1	3.00036	3.25177	3.11683	2.78484	2.87047	3.23772	3.69583	4.02623	3.92325	3.89393	4.17545	3.90736	3.31765	3.45038	3.0652	4.19482	3.83793	2.0535
B9d1	2.09631	1.72659	1.97388	1.96418	1.73372	1.47508	1.44881	2.06968	2.07624	1.8696	1.73249	1.9466	1.99132	1.79525	0.927259	2.21785	2.06504	2.53099
B9d1os	-1.49747	-2.10788	-1.99605	-1.53722	-2.73497	-2.66284	-3.65041	-1.83017	-1.51069	-2.31113	-2.68906	-2.18802	-0.0309192	-3.65041	-3.65041	-1.4802	-0.174717	-3.65041
B9d2	2.81178	2.48406	2.47331	2.63469	2.30609	2.34738	2.57748	2.45024	2.45203	2.70895	2.76398	2.75688	1.6793	2.01291	1.99891	1.91066	2.06504	2.12706
Babam1	5.44929	5.44998	5.32093	5.34648	5.3678	5.22237	5.65714	5.79189	5.79505	5.73479	5.60898	5.88805	4.81728	4.98263	4.83051	4.90531	5.40261	5.14206
Bace1	0.625299	0.557891	0.874114	-0.150624	1.14919	1.46897	0.330561	0.921426	-0.684433	1.43281	1.56422	0.807708	0.550253	-0.180818	1.37266	0.597106	-0.84661	0.484183
Bace2	-0.86178	-1.62862	-0.388676	-1.53722	-1.09613	-1.21138	-2.50051	-1.33487	-0.850939	0.0766301	-0.0221499	-0.904989	-2.84082	-0.263231	-3.65041	-0.927632	-3.65041	-3.65041
Bach1	4.95348	5.00453	4.77184	4.7048	4.82473	4.72984	5.2071	5.286	5.25158	5.15475	5.01625	5.22388	5.108	5.14353	4.62749	5.01387	4.84131	5.04102
Bach2	4.70543	4.84283	4.6996	4.59636	4.26625	4.56835	4.22713	3.95086	3.84438	3.97889	4.06958	3.90971	5.37257	5.08227	5.05763	5.45107	4.84867	4.64118
Bach2it1	-0.968453	-1.62862	-1.10626	-1.38687	-2.17934	-0.424803	-1.31034	-1.68951	-2.46293	-1.82243	-1.54106	-2.43832	-1.18672	1.10567	0.532222	-2.88472	-2.14408	-0.0767101
Bad	2.27059	2.14953	2.49536	2.2547	2.76957	2.49489	1.39835	1.57796	1.79534	2.11932	2.15524	1.93346	1.12279	2.07873	0.576962	1.95283	1.7872	1.454
Bag1	7.50484	7.46353	7.26179	7.23009	7.17105	7.14441	7.68885	7.82904	7.67769	7.49796	7.49345	7.57714	8.0931	7.90066	8.71225	8.25809	8.4678	9.07655
Bag2	1.77117	1.72659	2.12295	1.54496	1.98585	2.19542	1.68637	2.00903	1.59936	2.21077	1.90221	1.35691	0.909163	1.05424	-1.5025	1.51987	0.145146	1.23858
Bag3	4.52255	4.17448	4.11019	3.99426	3.64384	4.04242	3.90661	3.94763	3.73766	3.85396	4.03315	3.75135	3.92462	3.88504	4.20449	4.50579	4.29652	3.45827
Bag4	5.55284	5.65572	5.69881	5.65235	5.42544	5.50308	5.64497	5.58579	5.70216	5.58034	5.67957	5.62223	5.61806	5.63242	5.8368	6.06099	5.71375	5.68603
Bag5	4.03863	3.94285	3.96763	3.72786	3.83075	3.92466	3.91901	4.20582	4.02293	3.90179	4.05623	4.00482	6.58481	6.53148	7.81208	7.22632	7.42108	7.62624
Bag6	8.29477	8.13387	8.06874	8.04608	8.05559	8.11807	8.26363	8.4656	8.4401	8.38137	8.32142	8.27863	7.6106	7.93525	8.23246	8.26019	8.18492	8.10804
Bahcc1	8.5557	8.5651	8.4682	8.60787	8.31613	8.30958	8.42645	8.42824	8.32668	8.44319	8.3608	8.31606	8.24862	8.26617	7.87745	8.13449	8.07803	7.78934
Bahd1	6.31074	6.2779	6.25811	6.17188	6.15122	6.27739	6.24288	6.37841	6.38499	6.35707	6.3116	6.25519	5.79669	5.75081	5.43349	5.46916	5.77703	5.84176
Baiap2	4.67208	4.6633	4.57882	4.40061	4.71679	4.60338	4.86803	4.9302	5.06687	4.92713	4.88228	4.96116	4.8292	5.37584	5.46046	5.23718	4.98547	4.99779
Baiap2l1	2.72886	2.58275	2.67031	2.99804	2.68502	2.29081	2.22484	1.81013	1.76687	2.02167	2.11812	2.02303	1.62145	2.07873	2.1693	3.03925	2.31926	0.349292
Baiap2l2	-1.20885	-0.302374	-1.24559	-1.53722	-0.801819	-1.49987	-0.908707	-1.32442	-1.25577	-1.45804	-0.909957	-1.62454	0.544335	-1.13154	-3.65041	-1.4802	-3.65041	-1.75252
Baiap3	1.94288	2.48328	2.23071	1.99327	2.47309	2.13242	2.00986	1.67353	1.33422	2.03603	1.93103	1.64183	2.67214	2.11682	2.90773	1.86722	1.84722	-1.30274
Bak1	-1.49747	-1.49872	-1.99605	-1.25072	-0.981126	-0.280665	-2.50051	-1.56137	-2.0046	-0.53751	-0.631865	-1.00265	0.483781	-3.65041	0.389019	-1.4802	-0.435689	-0.815494
Bambi	3.67215	3.83579	3.66126	3.71545	3.47099	3.65569	3.22254	2.90878	3.02096	3.06461	3.18479	3.39655	3.95839	3.89603	4.41628	4.01742	4.05069	1.91499
Banf1	4.77487	4.44455	4.63204	4.58707	4.7341	4.50213	4.75501	5.11431	5.26818	4.94436	5.10746	5.14498	4.4087	4.16507	4.01426	3.88212	3.71448	3.95896
Banf2	-3.65041	-3.65041	-3.65041	-3.65041	-3.65041	-3.07372	-3.15847	-3.65041	-3.65041	-2.31113	-3.65041	-3.65041	0.954494	0.133529	0.337942	0.44586	1.72459	1.51007
Bank1	2.01325	1.6432	1.73533	1.46811	1.35026	1.27963	2.28355	2.54584	2.77798	1.87121	2.19142	2.11902	0.483781	1.31678	1.74815	0.714511	0.324745	2.63552
Banp	6.36254	6.63844	6.42464	6.2334	6.37508	6.46936	6.31496	6.30406	6.20097	6.3208	6.40386	6.21849	6.35996	6.74266	6.46601	6.59146	6.22161	6.53943
Bap1	7.14348	6.98608	6.87126	6.87111	6.91639	6.87105	6.90384	7.02229	7.11812	7.02222	6.86752	6.90398	6.616	6.91917	6.26373	6.34558	6.60846	6.19704
Bard1	4.94616	4.98398	5.01063	4.94529	5.11074	5.07287	5.47181	5.42691	5.40726	5.28672	5.40194	5.36406	4.50325	4.09045	4.72786	3.96172	4.31257	4.61201
Barhl2	4.94781	4.74212	4.47529	4.19421	3.67327	4.73154	4.10576	4.20244	3.43879	4.13481	4.23329	4.37707	4.75747	4.90166	4.24561	5.31279	4.75856	4.40948
Barx1	4.05914	3.95679	3.62171	3.14723	2.49944	3.59625	2.58528	2.75725	2.14422	2.49692	2.37044	2.91834	3.54952	3.82109	3.0173	4.09007	3.95847	3.17582
Barx2	-0.86178	-0.249158	-1.10626	-0.714399	-0.0562534	-2.08204	-0.337277	-0.96684	-0.850939	-1.04141	-0.631865	-0.727512	-3.65041	-3.65041	-1.93324	-0.417421	-3.65041	-3.65041
Basp1	2.83576	3.05425	3.0364	1.30091	3.83432	4.09952	0.352665	0.807347	0.416223	3.03631	2.52967	2.71832	-0.219423	-3.65041	0.389019	-3.65041	0.0462007	-3.65041
Batf	2.0696	2.20779	1.55812	1.30091	0.643026	1.57321	0.790724	0.231441	0.683235	0.698887	1.44339	1.02648	2.89777	2.21376	2.07886	3.51083	0.558115	0.817632
Batf3	2.36038	1.80417	1.77192	2.35415	0.767858	1.68279	1.04038	1.55127	1.14807	1.54952	1.63074	1.47045	1.7034	1.35978	-0.152728	2.64824	1.75623	2.0535
Bax	4.83894	4.55152	4.74908	4.84609	4.81933	4.63531	4.64363	5.06067	5.07401	5.08533	4.8106	4.76944	4.23129	4.02851	3.30282	3.79786	4.30189	3.60065
Baz1a	3.74148	3.55828	4.39752	4.12204	5.63591	4.19478	3.69583	3.78836	3.78811	3.59251	3.61602	3.84942	4.8295	4.18613	5.28297	4.77622	5.54055	5.71644
Baz1b	8.71918	8.72351	8.59595	8.51077	8.60599	8.5542	8.70728	8.75109	8.64775	8.65684	8.59992	8.63953	8.11479	8.24192	7.86211	8.07242	8.06956	7.99747
Baz2a	8.63417	8.69712	8.5718	8.56882	8.35986	8.51653	8.46777	8.50533	8.3662	8.46319	8.39419	8.45898	8.58121	8.72734	8.3489	8.5889	8.49059	8.46857
Baz2b	6.00529	5.91665	5.87954	6.03537	5.82081	5.92466	5.8931	5.85276	5.97142	5.71373	5.67436	5.67658	6.11247	6.46227	5.83242	6.2796	6.12491	6.21402
Bbc3	0.614252	-0.249158	0.303591	0.409801	0.50636	-0.502659	0.678529	0.759064	0.45243	0.0199587	0.320495	0.693859	0.285192	0.483784	0.819675	0.898378	1.59055	1.09931
Bbip1	2.08302	1.92485	2.47331	2.27627	3.11452	2.53441	2.55382	2.33721	2.44306	2.23214	2.69002	2.3323	1.83041	2.11682	3.03345	3.17904	2.55345	1.93561
Bbof1	2.09233	1.7385	2.53209	2.6865	3.1625	2.47371	1.96273	1.69679	1.76687	1.66491	1.55869	1.53626	3.20962	3.09081	4.83766	4.28424	4.23607	5.26325
Bbs1	2.83417	2.93573	2.87422	3.1747	3.2297	3.08972	2.93638	2.78584	2.97379	3.11824	2.94232	2.51807	2.83734	2.8115	3.29146	3.36386	2.7248	3.52511
Bbs10	2.8037	2.78762	2.95122	3.10343	2.92511	2.98308	3.27171	3.31582	3.2073	3.09236	3.17277	3.20204	1.64928	2.49982	2.13978	2.11017	1.72459	2.82427
Bbs12	2.00058	2.38655	2.20552	2.29975	2.55246	2.29081	2.69027	2.56	2.58028	2.37794	2.472	2.23068	2.05513	0.945544	1.49194	1.27594	2.60651	0.945136
Bbs2	3.94291	3.5395	3.5232	3.70293	3.92425	3.93577	3.78319	3.52157	3.37702	3.36685	3.42104	3.29745	4.39643	4.34703	3.88234	4.62794	3.83052	4.18245
Bbs4	4.83002	4.81155	4.72315	4.93872	4.61473	4.71894	4.63745	4.45025	4.41983	4.45963	4.4238	4.59388	5.17704	5.37597	5.61474	5.66895	4.79673	5.52204
Bbs5	0.71765	0.734722	0.74387	0.739072	1.11199	1.25618	0.941752	0.680878	0.828065	1.21027	1.13198	0.813458	1.90158	2.07873	3.13419	3.78041	3.17349	3.23525
Bbs7	3.13527	3.059	3.25248	3.12862	3.40525	3.13863	2.92965	2.89209	2.74989	3.19831	3.11742	2.92433	3.41004	3.37903	3.83754	3.65766	3.931	3.87604
Bbs9	4.18237	4.1598	4.13499	4.07098	4.39716	4.44883	3.98801	3.75489	3.82276	3.87847	3.91585	3.69016	6.35267	6.22847	6.95557	6.11885	6.52916	6.99975
Bbx	4.88218	4.77541	4.96277	5.14844	5.58199	5.0819	4.29529	4.11978	4.27167	4.32166	4.20731	4.10873	5.29671	5.2542	5.95008	5.91877	5.78529	5.8178
BC003965	3.53244	3.51664	3.64655	3.5341	3.547	3.42284	3.8299	3.9953	3.96458	3.83765	3.67685	4.05118	3.29227	3.51362	2.41087	3.05869	2.81623	3.05852
BC027072	0.136648	-0.148278	-0.979208	-1.47519	-0.285215	-0.280665	-0.180922	-1.13915	-1.25577	-0.625183	-1.39083	-1.78906	-2.32536	-1.13154	-0.47926	-2.88472	-3.65041	-3.65041
BC031181	2.41551	2.79398	2.61096	2.59909	2.76208	2.81675	2.69027	2.82917	2.53878	2.72676	2.62094	2.65567	1.4421	3.30396	2.65994	1.51987	3.10139	3.16713
Bc1	11.0582	10.5977	10.7374	11.0641	10.473	10.4183	10.6888	10.97	11.1957	10.7628	10.6232	10.6677	11.7246	12.347	11.869	11.5654	11.6726	11.6597
Bcam	0.18722	-0.197836	-0.388676	-1.0118	0.355379	0.611314	-0.667174	-0.271572	-1.3776	1.83717	1.50219	0.528907	-3.65041	0.631452	-2.55014	-3.65041	-3.65041	-3.65041
Bcan	1.23535	1.26024	1.35846	1.44824	1.2468	1.05621	0.944181	0.603689	0.713388	2.2848	2.1674	1.67379	0.420574	-1.13154	-0.227697	0.664635	1.04177	0.817632
Bcap29	4.26415	4.36059	4.58655	4.79744	4.69081	4.43506	4.50185	4.22373	4.40166	4.17883	4.29612	4.30671	5.27342	4.90311	5.43243	5.20744	5.33112	5.5919
Bcap31	4.56381	4.53265	4.4689	4.61408	4.67953	4.61472	4.76534	4.8634	4.83627	4.83363	4.85828	4.94505	4.08609	4.12824	4.31757	4.24235	4.05069	4.67774
Bcar1	4.90124	4.87584	4.98943	4.97684	4.96008	4.87543	4.72531	4.69397	4.82578	5.01476	4.72411	4.99966	4.88323	4.54862	3.80922	4.74656	4.9034	4.54313
Bcar3	3.53927	3.53458	3.32753	3.49735	3.27142	3.29636	3.11025	3.14269	3.15608	3.23861	3.35769	3.12898	3.00938	3.53395	2.77961	3.41905	3.2025	1.78239
Bcas1	3.31658	2.9893	3.07279	2.9423	2.32755	3.01765	2.89931	2.93672	3.08001	3.02915	3.04015	2.98991	2.51611	3.21894	1.2089	1.54765	2.7071	1.73847
Bcas2	5.90659	5.78977	5.70569	5.81257	5.72657	5.65726	5.90841	5.94021	5.91456	5.8217	5.79647	5.79765	5.87629	5.73335	5.51033	5.69496	5.64779	4.97282
Bcas3	6.56561	6.57341	6.57321	6.53485	6.32071	6.41747	6.21356	6.11139	6.09352	6.24648	6.33605	6.27421	6.93293	6.75172	6.68945	7.01922	6.66583	6.59712
Bcas3os2	-3.65041	-3.18301	-3.03033	-3.08949	-3.12127	-3.07372	-3.65041	-3.20507	-3.65041	-3.65041	-1.89859	-3.65041	-2.84082	-0.473565	-0.573907	-2.38716	-0.435689	-3.65041
Bcat2	2.23498	2.50744	2.23203	1.52423	2.24405	2.87178	1.24922	1.62047	0.908461	2.10577	1.36317	1.59252	1.67659	0.82798	1.29176	-0.217118	1.9328	0.286466
Bccip	5.49015	5.37781	5.09066	5.19524	5.11808	5.01834	5.16712	5.37479	5.22711	5.41862	5.17211	4.99808	5.3068	5.46849	4.77183	4.76739	4.92375	4.72293
Bcdin3d	2.69431	2.87411	2.69719	2.95644	2.46297	3.00435	3.01875	2.90324	2.82776	2.95325	3.0735	2.95782	2.19391	2.5094	3.31013	3.20544	2.87507	2.09074
Bckdha	4.93326	4.65983	4.83156	4.86888	4.56376	4.85021	4.75501	4.7977	4.86173	5.03831	4.96491	4.78415	4.6688	4.85696	4.23273	4.61487	4.17299	3.75364
Bckdhb	3.31658	3.55454	3.28449	3.23683	3.3956	3.57271	3.41032	3.41653	3.24392	3.25466	3.18658	3.33741	3.29139	4.51097	3.22132	3.70222	3.42064	4.36836
Bckdk	3.14618	3.23599	3.42725	2.87765	3.85417	3.24845	3.76854	3.78896	3.96426	3.79986	3.90826	3.96823	2.48555	2.00209	1.44202	2.68123	2.80416	2.46586
Bcl10	4.27032	4.21765	3.99884	4.30993	4.22302	3.93208	3.86876	3.76715	3.93609	4.0076	4.08857	3.97947	4.51465	4.13754	4.20449	4.22524	3.74635	4.40209
Bcl11a	3.10007	3.06637	3.13169	3.04046	2.73252	3.00153	2.36737	2.57611	2.61424	2.22589	2.50208	2.71294	0.658313	-0.543149	0.968143	0.809372	0.0462007	0.725906
Bcl11b	1.57623	0.41024	1.35605	1.73736	2.6691	1.57321	-0.020798	-0.487581	-0.465958	-0.454861	0.0843246	0.0818081	1.2001	0.133529	0.48135	0.115465	-1.16443	1.48231
Bcl2	0.617944	-0.153158	-0.0200579	-0.687771	0.398499	0.507905	-0.165133	0.188335	-0.0366016	0.385602	0.721174	0.813458	0.0958736	-0.527393	-0.818506	-0.912411	-0.151039	-1.8909
Bcl2l1	6.06246	6.04403	5.91892	6.01525	5.88364	5.79226	5.93261	6.00743	6.03107	6.05616	5.82784	5.86574	5.87246	6.00124	5.53761	5.69232	5.35689	4.95273
Bcl2l11	4.00555	4.04917	4.24221	4.28802	4.32864	4.11817	4.06673	4.28745	4.39144	4.13047	4.10668	4.32292	3.54285	3.02154	3.79082	3.93198	3.67859	4.18547
Bcl2l12	3.45716	3.1265	3.55976	3.52891	3.38053	3.66907	3.56388	3.51795	3.54614	3.52335	3.29422	3.7249	3.25562	2.89206	2.21247	2.62235	2.64082	0.903874
Bcl2l13	5.09761	5.04103	5.15094	5.19226	5.19055	4.90193	5.20077	5.31645	5.22828	5.33107	5.07715	5.06875	4.91769	5.01997	4.86925	5.23931	5.02369	4.66792
Bcl2l14	-1.34595	-1.77138	-1.39984	-1.25072	-1.46627	-2.08204	-2.25792	-1.23369	-1.51069	-1.62876	-1.13045	-1.62454	8.36217	8.08851	8.88204	7.82031	8.49824	9.2677
Bcl2l2	2.94265	2.88188	2.70289	2.7761	3.41482	3.09964	2.30733	2.51419	2.65675	2.62689	2.90794	3.08449	3.40188	3.59685	2.62628	3.38558	3.11366	4.13866
Bcl3	-1.85864	-1.49872	-0.0326237	-0.905709	-0.0562534	-0.149629	-3.15847	-3.20507	-2.76156	-1.45804	-1.89859	-2.18802	-2.84082	-3.65041	-3.65041	-3.65041	-2.70898	-3.65041
Bcl6	3.66325	3.62393	3.8182	4.12204	3.22644	3.52446	2.94185	2.27247	2.73527	3.04344	2.59416	2.28342	4.27661	3.42023	3.54219	3.48951	3.74635	3.34722
Bcl6b	4.95348	5.00192	4.98748	4.65366	4.40703	4.89833	5.68372	5.92367	6.04455	5.83367	5.94905	6.12541	3.62856	3.89968	3.59209	4.10884	4.30189	4.85057
Bcl7a	4.2425	4.39923	4.00077	4.09066	4.20132	4.12369	3.73737	3.63159	3.34608	4.1014	3.77947	3.63074	4.44727	3.93991	3.40003	4.43093	4.31948	3.75364
Bcl7b	4.70716	4.73108	4.31902	4.7025	4.48412	4.30743	4.55882	4.62997	4.51962	4.28756	4.43365	4.57136	4.35435	4.54607	4.06619	3.43774	4.53323	4.44191
Bcl7c	5.10716	4.97296	5.04206	5.16528	5.19236	5.01013	4.72408	4.87874	4.72338	4.87036	4.64998	4.73804	4.78	4.74161	5.09234	4.71536	5.19051	4.58616
Bcl9	6.48629	6.42788	6.38606	6.33834	6.39567	6.36219	6.37531	6.45144	6.42994	6.4947	6.43809	6.37304	6.26981	6.50892	6.2033	6.11317	5.84667	5.92016
Bcl9l	6.68754	6.64943	6.62544	6.26994	6.51413	6.48829	6.60555	6.7482	6.70401	6.74965	6.5887	6.71584	6.36206	6.58852	6.10562	5.98301	6.47074	5.97349
Bclaf1	7.95154	7.93653	7.9555	8.03565	8.0909	7.92031	8.27072	8.28523	8.39573	8.16809	8.13325	8.18626	8.08573	8.00202	7.70501	7.89683	7.92388	8.08183
Bco1	1.04006	0.545897	0.313554	-0.04546	-0.572559	0.451218	0.420509	-1.26331	-0.229618	-0.184622	-0.464862	-1.07517	1.59593	1.98297	3.89123	3.65063	3.20594	4.27355
Bcor	5.94154	5.7114	5.69072	5.52546	5.25369	5.50706	5.81232	5.85642	5.9199	5.58535	5.67755	5.65072	4.74463	4.36824	3.07303	4.39544	4.076	4.74354
Bcorl1	6.65136	6.56842	6.48787	6.88268	6.24951	6.31546	6.35441	6.44573	6.41224	6.42002	6.39794	6.23859	5.42826	5.36268	5.25054	5.24971	5.26638	4.17813
Bcr	7.56715	7.58611	7.32086	7.44653	6.6063	7.24201	7.28757	7.23608	7.08751	7.37939	7.30881	7.23251	7.07439	7.32824	6.90097	7.19531	6.9959	6.86145
Bcs1l	2.65891	2.45229	2.59062	2.58096	2.68502	2.39001	2.67573	2.84081	2.61184	2.77036	2.83432	2.52159	1.67659	2.74737	1.94873	0.98221	1.84722	2.55784
Bdh1	2.7874	2.6046	2.32114	2.70336	2.36755	2.55474	2.89241	3.5374	3.33933	3.31479	3.22025	3.35772	0.0548351	2.07873	1.60211	1.65373	2.25425	1.80722
Bdkrb2	2.41551	2.23606	2.49536	2.47692	2.17809	2.42302	1.92635	1.98824	1.69313	1.56743	1.64821	1.9466	2.75134	1.79525	3.18565	1.02237	1.69223	2.23081
Bdp1	7.46981	7.51248	7.33162	7.35944	7.32276	7.36838	7.48085	7.40935	7.41501	7.17518	7.33024	7.314	7.71019	7.94479	7.4959	8.05801	7.64046	7.63568
Bean1	1.63206	1.44757	1.71668	1.46811	0.706792	0.6834	0.869492	0.273296	-0.942001	1.15608	0.511987	0.724701	1.87824	1.74748	2.15461	1.79951	1.09224	1.61607
Becn1	5.96446	6.07318	5.95815	6.03628	6.05505	5.86962	6.09645	6.15408	6.0645	5.91459	6.02955	5.97792	5.56076	5.84262	5.6322	5.57251	5.48991	5.21599
Begain	4.76241	4.59237	4.44644	4.4786	4.25002	4.31907	4.2388	4.41913	4.28629	4.24214	4.18744	4.24714	4.53344	4.08726	4.12763	4.51637	4.46878	3.66997
Bend3	4.93585	4.65408	4.95205	5.05874	5.03497	4.64595	4.81246	4.83617	5.00559	4.84591	4.7711	4.67172	4.84493	4.50643	4.72065	4.64829	4.45293	4.52318
Bend4	6.61383	6.70159	6.75132	6.68248	6.86167	6.6962	6.38534	6.50036	6.38182	6.42548	6.3349	6.38232	6.43694	6.43369	6.52236	6.41652	6.32046	6.1115
Bend5	3.77079	3.48558	3.43981	3.3748	2.92511	3.21965	3.548	3.56785	3.59149	3.62565	3.44671	3.50268	3.70349	3.79744	3.13419	2.85139	3.62217	3.06789
Bend6	0.686347	-0.357627	0.25272	0.28092	-0.285215	-0.21366	0.869492	0.460062	-0.108627	-0.71853	0.276253	0.0333558	0.909163	0.182251	-3.65041	0.115465	0.0462007	-3.65041
Bend7	3.04903	3.13603	3.1097	3.50554	2.79912	3.1322	2.84122	2.72619	2.80623	2.84567	2.82667	2.85771	2.89777	3.41004	3.0652	3.17904	2.4411	2.94105
Best1	1.35077	0.596197	1.37995	1.40766	0.57631	1.47508	1.01519	1.27045	0.882157	0.769344	0.523389	1.2966	0.998443	1.79525	3.08082	2.45638	4.29113	2.89967
Best3	0.576807	1.04277	0.534085	1.1368	-0.0042719	0.6834	0.556867	0.876871	0.220161	0.46417	0.523389	-0.0687221	0.862361	1.40153	-0.152728	0.714511	0.758939	0.903874
Bet1	2.93528	3.31055	3.34706	3.26607	3.42434	3.29061	3.46123	3.45076	3.24907	3.29642	3.48123	3.34785	3.60031	3.49446	2.98447	4.07105	3.16172	2.66051
Bet1l	3.08281	2.90495	2.76955	2.49058	2.79839	3.08174	3.03593	2.80856	3.19347	3.22049	2.91445	2.79588	3.13282	2.0396	2.61774	2.52647	3.51432	3.30822
Bex1	4.7158	4.57937	4.53426	4.72	4.29998	4.34069	4.44361	4.66446	4.6721	4.64765	4.4812	4.39276	3.48069	3.62135	3.34547	3.49237	3.68928	3.80329
Bex2	2.27059	2.29008	2.633	2.0191	3.5153	2.36392	2.23579	2.69252	2.58844	3.0834	2.70345	3.08746	1.4829	0.522142	0.012739	1.27594	1.5586	1.13183
Bex4	4.9288	4.64901	4.4608	4.83446	4.81771	4.78658	4.66034	4.81256	4.81852	4.51758	4.50272	4.6568	3.86711	4.12045	2.3164	3.97457	3.86794	2.89336
Bfar	4.46248	4.29962	4.30941	4.45091	4.35076	4.22257	3.93984	4.04372	4.15787	4.16909	4.27604	4.3156	4.30708	3.86652	4.03245	3.849	4.50136	4.21908
Bfsp1	2.51785	2.87411	2.66059	2.71172	2.2968	2.81675	2.99552	2.95773	2.99051	3.04344	3.12367	2.91165	2.21269	2.73844	2.13978	1.82244	1.72459	1.42512
Bglap3	-2.6613	-2.31102	-2.59805	-3.65041	-1.86931	-2.20682	-2.05031	-2.01933	-1.78637	-1.62876	-2.07076	-3.12543	-0.705715	0.631452	-0.902003	1.27926	1.23386	-3.65041
Bgn	1.37932	1.00822	2.43161	0.739072	2.34569	2.90533	0.660921	1.93382	0.405182	3.32535	3.09467	2.09915	-1.6465	-3.65041	-0.0676236	-3.65041	-3.65041	1.30665
Bhlhb9	4.86111	4.69131	4.57391	4.66919	4.7059	4.72813	4.79608	4.91293	4.86207	4.8052	4.95319	4.85556	4.72252	4.45209	4.54036	3.9679	4.28028	4.7318
Bhlhe40	1.08342	1.1457	1.121	0.528107	2.14394	1.41282	2.48878	3.37308	3.22311	2.81268	2.52022	3.19545	1.27349	0.133529	-0.78415	0.98221	1.32109	1.80722
Bhlhe41	5.37761	5.35436	5.25089	4.71918	4.61077	5.11307	4.87759	5.18042	4.92462	5.14816	5.04719	5.16198	5.45018	5.78474	5.0706	5.72478	5.26362	5.34645
Bicc1	6.38729	6.50961	6.01038	6.1519	5.48212	6.05019	6.29376	6.1613	5.96986	6.02356	6.1486	6.10548	5.31334	5.7796	5.30707	5.19212	5.36769	5.15531
Bicd1	2.05878	2.54257	2.46552	2.55239	3.24857	2.63873	1.65261	1.79943	1.59289	1.22037	1.88905	1.23795	3.9433	3.70084	4.08567	3.88865	3.12583	4.51429
Bicd2	7.05778	6.9941	6.94326	6.9138	6.57941	6.86137	6.95662	6.85826	6.87636	7.01861	6.91329	6.83807	6.87443	6.8497	6.18273	6.32566	6.63413	6.26583
Bicdl1	5.84611	5.92976	5.70982	5.59262	5.52642	5.63732	5.69187	5.8454	5.68628	5.60908	5.75254	5.75057	5.57299	5.08034	5.2745	5.19805	4.92619	4.61201
Bicdl2	-2.6613	-1.77138	-1.76882	-3.65041	-1.61426	-2.66284	-3.15847	-2.59044	-3.13859	-2.31113	-3.65041	-2.43832	-3.65041	-3.65041	-3.65041	-0.417421	-0.0600335	-3.65041
Bicral	5.32889	5.34682	5.13698	5.27637	5.07191	5.29779	4.91675	4.91252	4.86845	4.95951	4.83368	4.79872	5.42826	5.62142	5.3761	5.37343	5.61601	5.13762
Bid	4.64067	4.63863	4.45518	4.82909	4.68132	4.42564	4.67137	4.72101	4.68832	4.63804	4.63122	4.56754	4.55236	4.62991	4.64886	4.62501	4.202	4.98276
Bik	3.14809	3.23786	2.91977	2.89904	2.14394	3.05957	3.19731	3.16649	3.36235	3.52742	3.09276	3.01508	3.11297	3.2649	3.09627	3.50376	2.48143	2.57108
Bin1	3.7583	3.60238	3.52855	3.4959	3.08962	3.40696	4.41107	4.67783	4.66363	4.47631	4.46133	4.36195	2.21269	2.98493	2.54077	2.67368	1.87631	2.34312
Bin2	6.6536	6.46781	6.17841	6.29846	5.71276	6.01325	6.25974	6.43314	6.13894	6.36349	6.18921	6.29208	5.79654	6.17704	5.48047	5.87187	5.96533	5.10522
Bin3	3.26454	3.42997	3.33428	3.32664	3.34139	3.17096	3.06411	3.29946	3.17571	3.41159	3.15455	3.0275	3.23739	3.667	3.38186	3.15305	3.18517	3.65761
Birc2	5.54038	5.56216	5.48887	5.51762	5.68917	5.55852	5.54062	5.36333	5.29485	5.25791	5.29749	5.47887	6.01367	5.72874	5.80047	5.98453	5.985	6.09418
Birc3	2.46143	2.45229	2.35168	2.50123	2.20041	2.28618	2.28355	2.4848	2.43403	2.43432	2.42414	2.14434	2.58114	1.82163	2.12629	1.86502	1.87631	1.1066
Birc5	4.18268	4.37846	4.38812	4.16528	4.75122	4.27601	4.75846	4.83792	4.9146	4.50757	4.81448	4.99445	3.76839	3.49927	3.22835	3.29832	3.39071	3.5346
Birc6	8.89437	8.94441	8.93364	9.0548	8.83419	8.97298	8.95273	8.84082	8.81364	8.59094	8.74024	8.83011	9.48501	9.50883	9.30554	9.68189	9.36865	9.41974
Bivm	3.08947	3.03292	2.95122	3.31022	3.22044	3.26146	3.17216	2.88085	3.02638	3.19191	3.09849	3.14047	3.11297	3.5419	3.00917	2.81756	2.62377	2.37366
Blcap	4.06253	4.06869	4.01762	4.06773	4.12984	3.88738	3.92517	3.82693	3.77065	4.00029	4.0097	3.94386	3.97499	3.90332	2.77961	3.83779	3.92475	3.27624
Blm	5.49241	5.4572	5.55282	5.4858	5.72926	5.51003	5.86085	5.71859	5.85697	5.6227	5.61776	5.72009	5.78576	5.50247	5.20137	5.72021	5.56978	6.2012
Blmh	6.12937	5.96804	6.07605	6.04615	5.91342	6.07116	6.30366	6.32287	6.40296	6.20562	6.22986	6.35886	5.41616	5.51417	5.05091	5.17841	5.29924	5.29731
Blnk	-0.422034	-0.982171	-0.653935	-0.816468	-1.20927	-0.584956	-0.766915	-1.13915	0.177535	-0.625183	-1.01599	-1.00265	-1.39837	0.444378	0.28499	0.44586	-2.70898	-0.551702
Bloc1s1	4.11963	3.83363	3.63915	3.8514	3.61671	3.59063	3.80239	4.17119	4.19841	4.18303	4.00699	3.84591	3.76839	4.34703	3.92147	4.05178	3.75185	4.40948
Bloc1s2	3.86311	3.81407	3.66613	3.75238	4.03708	3.80454	3.88466	3.94493	3.86064	3.66822	3.74336	3.54218	4.17016	4.22152	4.27747	3.92512	4.29113	4.28243
Bloc1s3	-0.669527	-0.00906394	-0.310088	-0.257519	-0.715699	0.280441	-0.823623	-0.812932	-0.607872	-0.454861	0.350677	0.334655	-0.436313	0.998199	-3.65041	-0.52907	0.695054	-3.65041
Bloc1s4	2.96457	3.07526	2.92709	3.38006	2.96477	2.99729	3.09175	2.96839	3.08001	3.15949	3.22025	2.85702	1.53456	3.46029	2.77961	1.70398	2.88941	1.205
Bloc1s5	4.1448	3.99864	3.8399	4.20727	3.76861	3.99008	3.86557	3.78565	3.52036	3.6636	3.61558	3.83853	3.73631	3.92853	3.85989	3.3623	3.23094	3.06789
Bloc1s6	4.07937	4.05527	3.74186	3.94193	3.95411	3.95774	4.14745	3.93383	4.01659	3.74059	4.01946	3.92407	4.21741	4.07118	3.70221	4.54111	4.21402	3.23525
Bloc1s6os	-0.0266615	-0.100365	-1.24559	-0.627486	-0.801819	-0.97107	-0.667174	-1.05042	-1.65731	-0.925568	-0.909957	-0.496538	-0.558353	-0.633022	-2.23967	-0.217118	0.0255705	-3.65041
Blvra	2.89781	3.06479	2.8097	2.9136	3.24803	2.95496	3.00718	2.95773	3.03834	2.36776	2.62094	3.11158	2.49938	3.01147	3.41181	3.15305	3.13789	2.28001
Blvrb	-0.140552	-0.249158	0.35273	0.66869	-0.414942	0.6834	-0.020798	0.683467	0.45243	0.86897	0.481136	-0.230878	-2.32536	-1.25584	1.42009	-3.65041	-1.73919	-3.65041
Blzf1	4.24548	4.28188	4.11341	4.34689	4.41612	4.22257	4.26015	4.10778	4.17882	4.15929	4.08729	4.13967	4.30664	4.52945	4.20485	4.79344	4.76168	4.13153
Bmf	4.09601	3.94257	4.05559	3.8687	3.79452	4.00774	3.77298	3.78836	3.75189	4.01487	3.9511	3.97627	3.93597	4.73571	4.1684	3.88266	4.13135	3.81614
Bmi1	6.12695	6.07956	6.29786	6.34782	6.45263	6.21946	6.03441	5.6326	5.67684	5.63808	5.7092	5.71068	6.67551	6.7113	7.18103	7.22632	7.10961	7.08984
Bmp1	1.66811	1.04491	2.09434	1.08626	2.36755	2.05302	0.735717	1.67353	0.797427	2.72765	2.35988	2.3353	0.763941	-1.0171	-0.152728	-0.650089	0.0462007	-2.90052
Bmp2	-0.86178	-2.10788	0.303591	-1.89508	-0.715699	-2.08204	-0.397496	-0.487581	-2.0046	-1.16738	-1.39083	-0.904989	-1.18672	-1.70975	-3.65041	-3.65041	-1.16443	-3.65041
Bmp2k	4.52599	4.49299	4.81434	4.62008	5.13774	4.74465	4.47942	4.50086	4.45617	4.5293	4.27661	4.46327	4.63787	4.61734	4.59359	4.40611	4.64184	4.3827
Bmp3	-0.990768	-0.636364	-0.829181	-0.283865	-0.87462	-2.34341	-0.953207	-2.33851	-1.94687	-2.59996	-2.34703	-1.59377	1.18877	0.314897	-1.61878	0.932497	-0.407362	-2.90052
Bmp4	0.826946	0.566822	0.38143	-0.244524	0.00590338	0.864862	0.0575507	0.701464	-0.294144	0.141822	0.670798	0.346601	-3.65041	-3.65041	-3.65041	-2.88472	-1.73919	-1.98078
Bmp6	2.9286	3.05953	2.86917	3.01839	2.27698	3.05278	3.33784	3.47749	3.64683	3.32067	3.4616	3.16878	2.03417	2.10424	2.18383	1.79951	1.48117	1.17062
Bmp7	4.82962	4.74754	4.86919	4.64583	4.64128	4.59266	4.51885	4.77815	4.60251	4.53209	4.5615	4.62793	3.81215	3.89603	3.03345	3.50659	4.39178	3.69559
Bmp8a	-1.0249	-2.07047	-1.57257	-1.25072	-0.699075	-2.34341	-2.25792	-2.86527	-1.90963	-1.3054	-2.07076	-2.16522	-0.323796	-3.65041	-0.78415	0.385558	-1.73919	-3.65041
Bmp8b	-0.312579	-0.374624	-0.171628	0.389105	-0.143528	-0.0295098	-0.223893	-0.621796	-0.0315919	-0.302541	0.221307	0.256604	0.602449	-0.199422	-2.99783	-3.65041	0.0462007	-0.683854
Bmper	-2.6613	-2.31102	-0.235561	-0.806885	-1.20927	-0.765134	-1.70769	-1.98603	-2.21564	-0.818338	-1.89859	-3.65041	-0.436313	0.31926	0.113367	-0.650089	1.44278	1.93561
Bmpr1a	6.03597	6.04456	5.99344	6.01017	6.13516	6.07845	6.13203	6.3081	6.34082	6.15289	6.27967	6.28331	5.71607	5.80052	5.56091	6.08974	5.59626	5.60821
Bmpr1b	2.49795	2.76258	2.6991	2.81619	1.83707	2.65585	2.32141	2.05974	2.28037	2.14605	1.82753	2.14206	3.25562	2.92893	2.41087	3.04998	3.3704	3.83272
Bmpr2	5.44657	5.61451	5.64829	5.63499	5.91595	5.76189	5.48875	5.33664	5.54242	5.33732	5.41908	5.24078	6.03954	5.85714	5.75276	5.68936	5.73991	6.14852
Bms1	8.53642	8.46719	8.35802	8.32439	8.18454	8.29113	8.4782	8.50694	8.46303	8.38576	8.30484	8.37519	7.81525	8.13082	7.49335	7.56306	7.8548	7.52994
Bmyc	-0.277865	-0.148278	0.25272	-0.714399	0.57631	-0.280665	-0.999124	-1.05042	0.0415375	0.506038	-0.198223	-1.22036	-1.18672	-3.09152	-3.65041	-3.65041	-1.73919	-0.0767101
Bnc1	6.15509	6.14507	5.96211	5.71824	5.76133	5.93475	6.15848	6.35119	6.26669	6.11813	6.19538	6.25717	6.37785	6.41145	6.05906	6.35544	6.23711	5.67856
Bnc2	7.45717	7.48986	7.33047	7.33871	6.88288	7.29125	7.39373	7.26444	7.21739	7.29891	7.23384	7.16285	7.56767	7.6914	7.1086	7.5226	7.34961	7.21325
Bnip1	2.69431	2.47618	2.64588	2.34236	2.86349	2.61035	2.7267	2.89656	2.92179	2.67356	2.8919	2.70291	2.5593	2.71379	2.87227	2.6762	2.36103	2.82427
Bnip2	6.27238	6.37479	6.25084	6.07486	5.98034	6.02855	6.47109	6.46043	6.33435	6.33908	6.20197	6.42326	5.62858	6.05782	5.47265	5.40984	5.68341	5.64138
Bnip3	4.2907	4.27099	4.37391	4.73607	5.05364	4.31936	4.4434	4.09105	4.05536	4.12946	4.11393	3.92739	4.31622	4.21569	3.50794	3.96944	4.18466	4.23455
Bnip3l	6.55614	6.58696	6.59864	6.65998	6.48941	6.56841	6.75476	6.85111	6.83813	6.77545	6.77063	6.95766	6.58337	6.46627	6.32665	6.62143	6.46847	6.32075
Bnipl	-1.85864	-1.92984	-1.99605	-2.37205	-2.73497	-3.65041	-2.25792	-1.63688	-2.0046	-1.62876	-1.89859	-1.1293	-0.323796	-0.812318	-3.65041	-1.2716	-0.210978	1.02428
Boc	2.64088	2.39494	2.91078	1.89247	1.98585	2.74277	2.64621	2.85237	2.41581	3.13967	2.98624	2.97716	1.16196	1.44211	1.34447	1.67907	2.27625	-3.65041
Bod1	5.87175	5.85274	5.65161	5.52071	5.49515	5.50582	5.87722	5.90784	5.72287	5.68782	5.5899	5.65172	5.38338	5.53448	5.62009	5.26045	5.44692	5.43963
Bod1l	7.03077	7.15571	6.79891	6.81398	6.90662	7.02763	6.93774	6.94717	6.76381	6.80468	6.83829	6.8164	7.16456	7.46532	6.88555	7.17936	7.13466	7.42675
Bok	0.329097	0.653213	1.28188	0.834012	1.51961	0.998033	0.588258	0.98578	1.03324	1.33166	1.15904	0.923898	-0.0309192	-1.89952	-3.65041	-0.782197	-2.14408	-3.65041
Bola1	2.81178	2.70239	2.41667	2.617	2.15541	2.35843	3.4785	3.39695	3.39108	3.12631	3.50538	3.12321	1.99132	2.56557	2.39846	2.01386	2.23191	-1.12142
Bola2	4.4282	4.05236	4.15867	4.48349	4.06654	4.23162	4.55107	4.57664	4.59038	4.39508	4.51086	4.41042	3.39367	3.8364	2.99275	3.58645	3.43048	3.39193
Bola3	2.38333	2.30884	2.30874	2.36479	3.08363	2.55281	2.19457	2.88648	2.5047	2.26054	2.38196	2.15344	1.16196	1.7312	2.57426	2.4854	2.25203	2.12706
Boll	4.45966	4.40152	4.48827	4.56418	4.76832	4.63985	4.58064	4.46669	4.66363	4.43627	4.55666	4.53745	4.59557	4.83428	4.90281	5.06018	4.75347	5.05286
Bop1	5.94154	5.75438	5.82083	5.90285	5.8906	5.69861	5.92411	6.16576	6.14331	6.00852	5.8288	5.95388	5.25112	5.28395	4.96935	4.83405	5.15206	4.59591
Bora	4.46479	4.37592	4.49649	4.7371	4.74554	4.43245	4.74198	4.72714	4.89187	4.61478	4.69919	4.71997	4.48096	4.39484	4.49504	4.38431	4.16121	3.6974
Borcs5	3.04218	2.98375	3.0364	3.18374	2.91164	2.86327	2.88611	3.06539	3.06196	2.90946	3.23823	2.74112	1.87589	2.61964	3.0173	2.16322	2.51696	2.83529
Borcs6	0.943329	1.16543	1.121	0.528107	1.08825	0.910632	1.01519	1.43315	1.03324	1.39988	1.22802	0.662343	0.602449	0.917039	0.23002	0.854561	0.145146	-3.65041
Borcs7	1.45144	1.23618	0.959075	1.04452	1.94413	1.29352	1.55907	1.48603	1.5214	1.55352	1.1784	1.40149	-0.112713	-0.793352	1.44926	0.602414	1.26499	1.05476
Borcs8	3.18589	3.26097	2.65961	2.6865	2.535	2.82474	2.93577	3.09535	2.85574	3.17903	3.00669	3.15752	2.76412	3.30945	1.78676	3.5457	3.72251	2.29605
Bpgm	2.95657	3.2191	3.34038	3.3748	3.68004	3.10621	3.09722	3.20755	3.26951	3.07924	2.93095	3.06414	4.26362	4.41969	4.63041	4.44799	4.18466	4.0657
Bphl	-2.34156	-1.37955	-1.24559	-1.12632	-0.893409	-0.672234	-1.70769	-1.83017	-2.0046	-1.05352	-1.89859	-2.18802	0.0548351	-3.65041	0.43835	-3.65041	0.0462007	-3.65041
Bpi	-2.34156	-3.65041	-1.99605	-3.65041	-2.73497	-3.65041	-2.7923	-3.65041	-3.65041	-3.05578	-3.0911	-3.65041	-2.32536	-1.54207	0.856435	1.62793	-1.42338	-1.75252
Bpifa3	-3.65041	-3.65041	-3.65041	-3.65041	-3.65041	-3.65041	-3.65041	-3.65041	-3.65041	-3.65041	-3.65041	-3.65041	1.99132	3.01886	4.72786	4.785	4.02494	5.21978
Bpifa6	-3.65041	-3.65041	-3.65041	-3.65041	-3.65041	-3.65041	-3.65041	-3.65041	-3.65041	-3.65041	-3.65041	-3.65041	-3.65041	-3.65041	0.532222	-2.38716	-0.174717	-3.65041
Bpifb5	-3.0727	-1.62862	-3.03033	-3.08949	-2.43057	-3.07372	-2.05031	-2.86527	-3.65041	-3.65041	-1.70878	-1.97479	-1.39837	-3.65041	-3.65041	1.09948	-3.65041	2.4616
Bpifc	-0.669527	-0.750056	-0.653935	-1.25072	-0.414942	-1.65125	-0.743278	-0.128449	0.0883091	0.307252	-0.631865	-0.646342	0.212418	-3.09152	-2.99783	-3.65041	-1.73919	0.151958
Bpnt1	3.87087	3.90491	3.52855	3.98049	3.86259	3.91721	3.82332	3.9479	4.00445	3.81243	4.09495	3.94386	3.97499	3.23057	3.34288	3.65191	3.67362	3.08644
Bptf	8.68279	8.68501	8.48139	8.48141	8.0939	8.42873	8.5893	8.61231	8.58105	8.5286	8.44258	8.45195	8.59646	8.88371	8.35009	8.56764	8.54145	8.57367
Braf	4.08937	4.08898	4.57598	4.40423	5.12889	4.5133	4.13315	3.8441	4.10198	4.08561	3.93661	3.99757	5.15657	5.19637	5.32767	5.13099	5.50629	5.31532
Brap	6.58099	6.59472	6.46898	6.4562	6.62086	6.28696	6.59656	6.64479	6.56505	6.40806	6.3105	6.50299	6.11022	6.62152	6.46705	6.59937	6.3912	6.71587
Brat1	5.30762	5.28604	5.31009	5.36634	5.13542	5.21782	5.18121	4.99691	5.26641	5.19451	5.17075	5.11007	5.13778	5.37059	4.65383	4.83405	4.79597	3.63887
Brca1	6.92024	7.07392	7.0378	7.01478	7.20598	6.9909	7.34822	7.3487	7.36692	7.18331	7.20385	7.25606	6.75868	6.38503	6.46608	6.50721	6.48285	6.89369
Brca2	7.45398	7.53104	7.54125	7.66017	7.636	7.43661	7.53907	7.45273	7.50287	7.31674	7.33129	7.35668	7.90133	7.72347	7.66231	7.68257	7.82801	7.83238
Brcc3	3.60399	3.60166	3.53389	3.62939	3.51351	3.59063	3.79938	4.03361	3.84301	3.4914	3.55715	3.60071	4.04372	4.19506	3.98094	4.10604	3.90441	3.93867
Brd1	7.56255	7.51226	7.40807	7.41514	7.13887	7.36698	7.54027	7.51874	7.47949	7.43971	7.42228	7.34249	6.93787	7.17534	6.8317	6.9271	6.9554	6.4193
Brd2	8.45249	8.42573	8.41406	8.3174	8.42406	8.35547	8.48772	8.56206	8.59327	8.42753	8.35674	8.49059	8.38045	8.64768	8.22721	8.30384	8.09685	8.15306
Brd3	7.98259	7.95888	7.70953	7.75984	7.53199	7.65165	7.9973	8.12917	7.95293	7.90807	7.86558	7.93788	7.23336	7.40978	7.14527	7.23862	7.58371	7.47201
Brd4	8.62792	8.57625	8.40104	8.50432	8.37429	8.34923	8.52458	8.6059	8.57311	8.52749	8.45162	8.45295	8.3179	8.5533	7.92536	8.28206	8.1983	8.08143
Brd7	6.93968	6.89557	6.93773	6.8873	7.01808	6.80991	7.01518	7.03758	6.95181	6.92815	6.90704	6.9618	6.26779	6.47088	6.14969	6.02327	6.35936	6.34311
Brd8	6.84978	6.78937	6.6715	6.71964	6.84228	6.75817	7.09223	7.02216	6.94019	6.87012	6.78101	6.91697	6.85633	6.88674	6.37353	6.8139	6.60911	6.33401
Brd9	5.8187	5.76331	5.63718	5.63927	5.62047	5.50208	5.7521	5.71258	5.80568	5.63466	5.62879	5.65082	5.38773	5.54267	5.15952	5.36799	5.34679	4.80926
Brdt	5.26293	4.96566	5.38891	5.59714	5.68324	5.17158	5.1409	4.96268	5.04629	5.04009	4.89349	4.84508	5.27811	5.44373	5.79361	5.70949	5.67516	5.79033
Bre	3.67038	3.75637	4.03654	3.88061	4.08556	4.0352	4.15899	4.04599	4.14907	3.99626	3.98792	4.00419	4.21741	3.85154	3.10775	3.32184	3.77753	3.4222
Brf1	6.41924	6.56508	6.33203	6.43742	6.40043	6.42465	6.48158	6.46091	6.40071	6.28224	6.284	6.29427	6.22415	6.38964	6.0079	6.085	5.91311	5.85941
Brf2	3.83959	3.75017	3.91911	3.75602	3.88654	3.96499	3.99124	3.8383	3.96458	4.03252	3.92304	4.12269	3.54211	3.31	3.31013	3.2827	3.80805	2.26217
Bri3	3.46743	3.38397	3.18625	3.64737	3.12448	3.20748	3.0467	3.0358	2.93465	3.22989	2.90866	3.24522	3.65626	3.43539	3.72227	3.26524	2.7232	2.86784
Bri3bp	5.83356	5.76023	5.64571	5.80478	5.79253	5.45716	5.75634	6.00012	5.77741	5.66247	5.78151	5.74588	5.48013	5.84858	5.60397	5.77706	5.83597	6.26277
Brinp1	0.458262	0.271458	-0.097149	0.139386	-0.893409	0.413564	0.0709459	0.854067	0.620971	0.183702	0.485029	0.662343	-3.65041	1.08019	0.927259	-0.52907	0.0462007	1.93561
Brinp2	1.95898	2.35597	1.8286	0.951597	1.80829	1.82023	2.34365	2.61529	2.38336	2.44835	2.44926	2.79516	2.0129	2.21376	1.82435	0.54292	2.55345	3.13807
Brinp3	-3.65041	-3.65041	-3.03033	-3.65041	-3.65041	-3.65041	-3.65041	-3.65041	-3.65041	-3.05578	-3.0911	-3.65041	1.04109	0.444378	1.34447	1.40306	0.820114	0.0796887
Brip1	4.81883	4.83838	4.96573	4.70877	5.09175	5.06412	5.25287	5.19909	5.22893	5.08326	5.08005	5.19856	4.95887	4.73938	4.64991	4.96319	5.04722	5.39751
Brip1os	3.08615	2.93113	2.97024	2.97739	3.4352	3.34496	2.94973	3.07725	3.05138	2.83503	3.06051	2.73432	3.37879	2.72535	4.04485	2.63017	3.24216	3.71122
Brix1	6.17676	5.91767	5.82584	5.85526	5.89283	5.70133	6.09993	6.27876	6.20284	6.3022	5.90759	6.03809	5.97226	6.21361	5.90605	5.43739	6.02436	5.36747
Brk1	4.35017	4.38689	4.56325	4.57338	4.83386	4.52438	4.64176	4.64499	4.71483	4.48419	4.55458	4.78049	4.80186	4.8756	4.51731	4.56476	4.63121	3.60709
Brms1	5.33899	5.30407	4.94405	5.16968	4.58725	4.98111	5.14499	5.4143	5.38167	5.20646	4.96665	5.28089	4.48406	4.96359	4.73528	4.91067	4.76168	4.48836
Brms1l	4.08838	4.14248	3.94177	3.96973	4.19883	3.90218	4.077	4.26515	4.09541	3.85355	4.09845	4.3484	4.18164	3.65065	3.72724	3.85458	3.96526	4.21064
Brox	4.81783	4.91411	4.9151	4.75014	4.83029	4.93571	5.07331	4.84791	4.90973	4.83978	4.83731	5.20226	4.99891	4.76399	5.30292	4.99381	4.9918	4.5364
Brpf1	6.74253	6.77792	6.5415	6.45321	6.7517	6.55832	6.83611	6.89395	6.93244	6.78106	6.78792	6.60717	6.09853	6.55254	5.60842	5.94708	5.96854	6.23788
Brpf3	4.90143	4.8439	5.00103	4.92746	5.59004	4.97394	4.52495	4.58047	4.65996	4.93673	4.84338	4.72227	4.49561	4.4794	4.27713	4.49119	4.56127	4.42779
Brsk1	3.27627	3.45784	3.02128	3.20166	3.48015	3.29061	3.11349	3.46625	3.11432	3.34394	3.32169	3.36752	3.35193	3.66271	4.06619	3.56622	3.57946	3.5346
Brsk2	5.04699	5.03434	4.90731	4.97511	5.12233	4.96854	4.97283	5.02781	4.83095	5.07198	5.03114	4.90521	4.78031	5.11714	5.01295	5.04344	4.88491	4.60559
Brwd1	8.83824	8.88255	8.76831	8.87882	8.71535	8.7299	8.80085	8.73585	8.70265	8.57636	8.6277	8.52535	9.09447	9.33163	8.84893	9.07266	8.88014	9.00304
Brwd3	7.06629	7.06045	7.06988	6.9597	6.41082	7.0107	7.06797	6.95154	7.05255	6.8119	6.91021	6.98152	7.57381	7.61368	7.47651	7.8239	7.7113	7.65334
Bscl2	2.33144	2.88128	2.81233	3.08875	3.27194	2.96295	2.49459	2.7199	2.6552	2.67172	2.76077	2.84864	3.42622	3.70917	4.57634	4.31285	4.79787	4.6808
Bsdc1	5.08683	5.08883	4.82461	4.97667	5.07856	5.06328	4.6077	4.65641	4.64381	4.74811	4.7627	4.67745	5.81494	5.70747	5.82479	5.88036	5.58749	5.9993
Bsg	7.08933	7.07262	6.9337	6.71356	7.25476	6.85792	7.2599	7.56514	7.26213	7.22582	7.31634	7.31428	6.18796	6.36215	6.33864	5.9934	6.57202	6.32065
Bsn	-0.146803	0.0345074	1.20368	1.50705	2.60026	0.233189	0.277627	0.269854	0.379085	0.376602	0.230611	0.597167	1.64928	0.383175	1.99891	2.11017	2.30221	3.51418
Bspry	2.92041	3.06479	2.67997	2.53365	2.09712	2.35843	3.11888	3.393	3.51181	3.08547	3.14782	3.38742	5.89603	5.60207	6.99984	6.16229	6.32151	6.64962
Bst2	2.09631	1.82913	1.94212	2.00556	1.65509	1.93984	1.50088	2.06968	1.16998	2.38917	1.97322	1.93346	1.92454	0.559507	0.486049	1.60167	1.09224	-3.65041
Btaf1	6.49202	6.537	6.64838	6.61613	6.98747	6.61754	6.79365	6.78747	6.88011	6.70984	6.64687	6.74762	6.83861	6.62422	6.21316	6.69525	6.67714	6.92567
Btbd1	5.4609	5.53776	5.44946	5.50035	5.76143	5.60891	5.53961	5.55783	5.75212	5.57568	5.55097	5.5829	5.96258	5.88104	6.0865	6.20556	6.47205	6.21613
Btbd10	6.19579	6.03594	5.95606	5.86971	6.15194	5.8983	6.32379	6.40895	6.37028	6.16862	6.14183	6.1765	5.81463	5.77563	5.67115	5.81199	5.80756	5.66627
Btbd11	1.28263	1.3833	1.61964	1.87917	1.50175	1.41282	1.81134	2.17463	2.28138	2.37794	1.98701	1.75223	-0.0309192	-0.633022	0.781954	0.55939	-0.435689	1.91499
Btbd16	-1.36041	-1.68404	-0.908022	-0.577745	-0.912446	-1.08623	-1.12583	-2.35968	-1.65731	-1.04141	-3.0911	-0.638471	1.32962	1.82624	3.55343	2.82892	3.48722	3.37013
Btbd17	-0.146803	-0.249158	-0.235561	0.235267	-1.09613	0.326194	-0.118775	-1.23369	-1.82053	-0.818338	-1.01599	-1.34292	0.285192	-1.13154	0.172872	-0.126513	-2.14408	-3.65041
Btbd18	5.90612	5.75275	5.64336	5.85186	5.69901	5.64207	5.70177	5.65347	5.69952	5.75555	5.57969	5.55421	5.24429	5.36414	4.84224	5.09142	5.10675	5.20287
Btbd19	0.0842393	0.157842	0.0411801	-0.132555	-0.421745	-0.0295098	0.524778	0.921426	0.588801	0.738063	0.134753	1.82377	0.0548351	-0.399993	0.620357	-0.417421	0.935193	0.151958
Btbd2	3.65429	3.69998	3.70921	3.46656	3.99651	3.42231	3.24782	3.4243	3.21259	3.40607	3.43166	3.22918	3.79356	3.93245	3.55343	3.46786	3.26324	3.31611
Btbd3	4.80352	4.84099	4.74448	4.64714	4.75499	4.61472	4.88551	4.87336	5.08139	5.01494	5.0429	5.01689	5.06989	5.07906	4.35979	4.62468	5.06629	4.8383
Btbd35f1	-3.65041	-3.65041	-3.65041	-3.65041	-3.65041	-3.65041	-3.65041	-3.65041	-3.65041	-3.65041	-3.65041	-3.65041	-0.918069	1.07761	-3.65041	-0.264647	-0.924756	-3.65041
Btbd6	4.05914	4.09928	3.97157	3.82352	3.80548	3.78829	4.40667	4.42668	4.38349	4.4254	4.35101	4.48865	3.29139	3.7257	3.40624	3.09586	2.95906	3.64515
Btbd7	7.05926	7.12391	7.09636	6.99967	6.96079	7.0002	7.0656	6.99333	7.00581	6.91612	6.86374	6.89137	7.35001	7.44393	7.17708	7.6848	7.44555	7.55561
Btbd8	4.08271	4.12747	4.2212	4.22227	4.35226	3.91046	4.02805	3.84149	3.97364	3.77568	3.84492	3.75359	4.36782	3.89786	4.4322	4.08676	4.30671	4.17813
Btbd9	5.28661	5.33053	5.23901	5.27355	5.03155	5.31931	5.0967	5.25543	5.06175	5.13053	5.08455	5.1648	5.21199	5.60386	5.36658	5.57251	5.47072	5.24023
Btc	-3.0727	-1.49872	-2.59805	-3.08949	-2.17934	-1.49987	-3.15847	-3.65041	-3.13859	-2.31113	-2.68906	-1.78906	-1.39837	-3.65041	-0.227697	-3.65041	0.0462007	1.73847
Btd	1.16138	1.1849	1.44937	2.1355	1.44679	1.57321	1.71509	1.62047	1.23378	2.03603	1.94523	1.31698	0.602449	1.20333	1.37012	1.88911	1.23386	0.467287
Btf3	5.19257	5.04384	5.21878	5.37702	5.28536	5.26454	5.49248	5.69336	5.57162	5.55438	5.51203	5.52713	5.23972	4.75597	5.21577	4.87548	4.97811	5.36937
Btf3l4	4.85447	4.61748	4.76527	4.55166	4.79515	4.8506	5.06385	5.1234	5.14348	4.98342	4.93676	5.08593	5.24657	5.24649	5.01924	5.57454	5.04049	5.11881
Btg1	4.46479	4.40567	4.72595	4.35865	4.6372	4.52683	4.70756	4.45537	4.64028	4.67062	4.67448	4.68766	4.93221	4.89034	5.21028	5.00888	5.05042	5.02186
Btg2	3.47253	3.69693	3.71862	3.643	3.86957	3.66017	3.89411	3.74873	3.5032	3.75325	3.52914	3.94386	4.01298	4.14677	3.74205	3.83779	3.91005	3.37768
Btg3	5.60272	5.52464	5.51892	5.50889	5.55723	5.66995	5.78304	5.87168	5.91561	5.70713	5.71863	6.00675	5.93104	5.8499	5.46835	5.64985	5.92238	5.88203
Btg4	-2.07999	-2.10788	-1.99605	-2.37205	-2.17934	-2.08204	-1.43102	-1.05042	-1.0392	-3.05578	-1.70878	-1.22036	0.0548351	0.483784	0.389019	0.714511	1.36281	2.68507
Btk	-2.34156	-1.77138	-1.39984	-1.0118	-1.20927	-1.34842	-2.05031	-1.83017	-1.14342	-1.62876	-1.70878	-1.62454	-2.84082	-3.65041	-0.390442	-3.65041	0.145146	-3.65041
Btnl10	0.839648	0.896955	1.00898	-0.741528	1.46165	1.52498	-1.97497	-1.89051	-1.64195	-0.415247	-0.869632	-0.831358	-0.160242	-0.851015	-1.37772	-1.03893	-0.338887	-1.08774
Btnl7-ps	4.01082	4.10721	3.87396	4.02812	3.11334	3.89461	3.6777	3.59217	3.39574	3.57295	3.38034	3.88022	4.41277	3.92495	3.50794	3.91449	4.14934	3.84367
Btnl9	-0.35537	0.038793	-0.317757	0.276419	-0.971112	-0.584956	-0.159908	-0.565373	-0.700245	-2.04619	-0.727722	-0.510837	-3.65041	-3.65041	0.998063	-0.782197	0.29919	-3.65041
Btrc	4.85565	4.94712	4.73084	4.74057	5.27448	5.06429	4.72901	4.81684	4.63241	4.80226	4.7703	4.64536	4.89375	5.05391	4.5711	5.12154	5.18383	5.29771
Bub1	5.56855	5.67573	5.9915	5.83666	6.41196	5.96851	6.19207	6.19322	6.17351	6.03397	6.1355	6.19238	5.5896	5.20524	5.14306	5.32408	5.45899	5.61941
Bub1b	7.28073	7.22301	7.27861	7.24813	7.28311	7.22131	7.56385	7.59798	7.67511	7.51767	7.4324	7.53907	6.54795	6.45237	6.0864	6.23672	6.49099	6.3119
Bub3	5.30074	5.32724	5.17675	5.08085	5.29809	5.19827	5.60207	5.75544	5.77187	5.60113	5.47214	5.55206	4.64825	4.61401	4.58732	4.68503	4.32898	4.01332
Bud13	5.1142	5.12165	4.82939	4.95641	5.01307	5.02321	5.25189	5.42013	5.11722	5.11641	5.10176	5.22172	4.70704	5.25306	4.53555	3.71453	4.94451	4.5019
Bud31	4.85936	4.78947	4.99524	4.97996	5.25222	4.9057	5.11027	4.98121	5.19113	4.98194	4.96125	5.21996	4.69574	4.85132	4.86497	4.60465	4.86	4.05208
Bves	1.16138	1.67246	1.75374	1.84766	1.85125	1.70027	1.54953	1.00454	0.931732	1.18472	1.64821	1.35691	0.135777	1.20333	0.662485	0.55939	0.989464	1.64139
Bysl	5.22107	5.03903	5.18864	5.25508	5.19417	5.10604	5.26276	5.45749	5.44369	5.54073	5.50618	5.29766	4.4087	4.6211	3.79035	3.70222	4.01189	3.77096
Bzrap1	5.10107	5.00466	4.89306	4.60961	3.84499	4.69538	4.28503	4.08617	4.01084	4.28846	4.0198	4.24209	5.25542	5.70361	5.27433	5.27507	5.14908	5.51521
Bzw1	7.50097	7.51057	7.62283	7.65652	7.74954	7.63038	7.83718	7.83081	7.97361	7.77093	7.69246	7.85226	7.70066	7.64441	7.77272	7.98396	7.90891	8.19022
Bzw2	2.47269	2.29547	2.69529	2.91867	2.76658	2.58422	3.05852	3.07971	3.70689	3.20468	3.20794	3.25159	2.35133	1.50666	2.07731	1.10323	2.85766	0.151958
C030005K15Rik	-2.12865	-2.10788	-1.76882	-1.7595	-2.00575	-0.993377	-2.25792	-1.56137	-2.0046	-1.62876	-1.39083	-2.74135	-0.436313	-3.65041	-0.654366	-0.313796	-0.29931	-0.683854
C130060C02Rik	1.00101	0.596197	0.971713	1.3659	1.18097	1.05349	0.238592	0.429538	0.133612	0.546725	1.1808	-0.360836	0.135777	0.858281	0.337942	0.898378	1.04177	-3.65041
C1d	2.6032	2.78762	2.84361	2.36479	3.48015	2.65585	2.76703	3.03022	2.90817	2.41247	2.53906	2.44031	2.31876	3.41004	3.00098	1.86722	2.56957	3.54805
C1galt1	3.67215	3.76642	3.79171	3.7196	3.86609	3.82061	4.01164	3.77628	4.19841	3.90571	3.9511	3.79196	3.57078	3.76222	4.21161	3.17904	4.17299	4.39093
C1galt1c1	1.05647	0.999456	0.76943	1.20943	0.936929	0.998033	0.869492	0.783408	1.14807	0.83652	1.10694	1.23366	1.4421	2.31554	0.892282	1.27594	-0.435689	2.6972
C1qb	-2.6613	-3.65041	-3.65041	-3.08949	-3.65041	-1.49987	-3.65041	-3.65041	-3.65041	-3.05578	-2.68906	-3.65041	-3.65041	-1.89952	-2.55014	-0.126513	-0.435689	0.861398
C1qbp	5.5745	5.4561	5.49107	5.63817	5.60277	5.38941	5.98655	5.97279	5.95353	5.79946	5.76019	5.85532	5.42222	5.2866	4.85365	4.79373	5.42	5.4858
C1ql1	3.01443	2.64029	2.96709	2.86197	2.68502	2.63782	2.56175	2.38811	2.11063	2.56782	2.55766	2.63147	2.0129	2.27119	1.18019	2.18284	2.40162	2.19705
C1qtnf1	-1.08365	-1.80171	-0.73376	-1.38687	-1.46627	0.0813724	-2.50051	-2.35968	-2.21564	-0.302541	-1.70878	-1.1293	-3.65041	-2.6897	-2.20897	-0.897349	-3.65041	-0.960363
C1qtnf4	3.46743	3.32378	3.4517	3.7725	3.05941	3.32482	3.44031	3.55022	3.50751	3.31479	3.48609	3.67445	4.11632	3.9914	5.06668	5.26882	4.56574	4.94512
C1qtnf5	-3.65041	-0.990881	-0.471792	-0.778511	-3.65041	-0.568117	-0.268183	-0.505164	-0.850939	-1.44203	-0.811183	-0.316203	-2.32536	0.444378	-3.65041	-2.88472	-1.73919	-3.65041
C1qtnf6	0.0842393	-0.249158	1.06313	-1.38687	-0.0562534	0.37054	-0.823623	0.158865	-1.51069	0.93176	0.667376	-0.646342	-0.558353	-0.199422	-3.65041	-3.65041	-3.65041	-3.65041
C1qtnf7	-1.34595	-1.77138	0.105669	-1.89508	-0.690834	-0.137157	-3.15847	-0.700632	-3.65041	0.234399	-0.811183	-1.59377	-3.65041	-3.65041	-2.20897	-2.88472	-0.586318	-3.65041
C1qtnf9	-1.85864	-1.62862	-0.754426	-0.545513	-2.43057	-1.34842	-1.86885	-1.13915	-0.850939	-2.63594	-1.39083	-0.0687221	-1.94636	0.595928	-1.93324	1.06144	-1.16443	-3.65041
C1ra	-0.0266615	-0.197836	0.576073	-0.806885	0.737648	1.13287	-3.65041	-0.375537	-1.82053	1.35017	0.622138	0.174088	-3.65041	-3.65041	-3.65041	-3.65041	-3.65041	-3.65041
C1s1	0.75501	0.661574	1.72976	0.501357	1.71213	2.24151	-0.53955	0.353531	-2.30953	2.49484	1.43737	1.12918	-3.65041	0.182251	-1.03035	-3.65041	-3.65041	-2.04397
C2	-0.743383	-0.233569	0.644762	-0.193685	0.8464	0.998033	-1.43102	-0.430472	-0.645645	0.0710621	-0.920217	-0.646342	-3.65041	-3.65041	0.662485	-0.927632	-2.14408	-3.65041
C230088H06Rik	-1.83827	-1.31251	-3.65041	-2.0905	-2.48653	-1.23776	-3.65041	-2.17949	-3.65041	-2.09543	-1.25477	-2.18802	2.50244	0.849257	2.1693	1.01443	2.09999	0.484183
C2cd2	3.53732	3.47771	3.23293	3.39571	3.19287	3.23172	3.40152	3.48863	3.53732	3.27901	3.7229	3.48478	3.02008	2.68872	2.93377	2.69992	3.62217	1.43963
C2cd2l	3.48269	3.51279	3.55976	3.45217	3.54656	3.61065	3.29139	3.55058	3.68537	3.56356	3.60712	3.52957	3.55762	3.70084	3.12744	3.4168	3.91707	3.2995
C2cd3	6.36316	6.40311	6.19458	6.20778	6.10922	6.29777	6.07313	6.04838	5.98955	6.01443	6.05161	6.0152	6.65617	6.75096	6.49231	6.70592	6.45901	6.42542
C2cd4b	-2.07999	-2.31102	-1.24559	-1.25072	-0.414942	-1.21138	-3.15847	-3.65041	-1.3776	-1.82243	-2.37498	-3.12543	-3.65041	-3.65041	0.892282	-3.65041	-3.65041	-3.65041
C2cd5	5.25228	5.22447	5.38522	5.33571	5.70175	5.49459	5.28998	5.18671	5.34711	5.24946	5.24049	5.36381	5.73276	5.94984	5.69342	5.89504	5.74129	6.14132
C3	1.7545	2.02546	1.49386	1.96418	1.90661	0.849277	1.08287	0.964646	1.12582	1.58707	1.40281	1.27593	1.62145	0.483784	0.532222	0.385558	0.989464	0.409495
C430042M11Rik	0.115913	0.0642428	-0.144098	-0.372972	-0.183436	0.204077	-0.103647	-0.0107563	-0.57835	-0.063318	-0.590314	-0.27291	-1.94636	0.224737	-0.390442	1.15472	-3.65041	-2.58644
C4a	0.85224	1.32484	0.840056	1.36378	1.71678	1.23235	1.38768	0.912625	1.33422	1.85348	1.33541	1.35494	1.75299	0.464216	2.48904	0.10802	0.695054	0.220779
C4bp-ps1	-3.65041	-2.62677	-3.65041	-3.08949	-2.17934	-1.86085	-1.86885	-3.65041	-2.21564	-1.52392	-3.65041	-3.65041	1.4421	1.08019	0.927259	0.940903	1.65913	-0.563228
C7	-1.85864	-3.65041	-3.03033	-2.68663	-3.65041	-2.34341	-2.50051	-3.20507	-3.13859	-2.63594	-3.0911	-3.65041	-0.0309192	-3.65041	1.18019	-0.650089	-0.944972	1.06228
C730034F03Rik	0.721087	0.289553	0.910671	0.0472819	0.562589	0.266427	-0.0689548	0.143901	-0.507086	-0.993952	0.239856	0.306388	1.15809	-0.193194	1.34964	1.30554	0.861444	-3.65041
C8b	2.10948	2.28197	1.44937	1.48771	1.85125	2.21986	1.99822	1.99867	1.79534	2.06433	1.95929	1.80946	1.99132	1.85658	1.53793	1.54765	2.7232	2.86784
C8g	0.538364	0.624987	0.840056	0.979555	0.854869	0.752056	1.12629	0.709109	0.555898	0.769344	0.889222	0.813458	-0.323796	1.59388	2.71001	1.72846	2.11716	2.31191
C920021L13Rik	-1.19583	-1.33451	-1.23104	-0.855451	-1.19755	-0.672234	-2.01215	-1.16687	-2.23855	-0.616172	-1.21634	-1.22036	0.514376	-1.54207	-1.1275	0.270226	-0.684874	1.61607
CAAA01000182.1	-3.65041	-3.65041	-3.65041	-3.65041	-3.65041	-3.65041	-3.65041	-3.65041	-3.65041	-3.65041	-3.65041	-3.65041	-1.94636	-3.65041	-3.65041	-0.126513	-0.944972	1.17062
CAAA01093181.2	-0.26421	-0.80276	0.247532	0.28092	-0.160496	0.335173	-0.397496	-0.380938	0.382842	-0.925568	-0.255527	-0.727512	-1.16716	-3.65041	1.24816	0.354435	1.29547	-3.65041
CAAA01139602.1	-3.65041	-3.65041	-3.65041	-3.65041	-3.65041	-3.65041	-3.65041	-3.65041	-3.65041	-3.65041	-3.65041	-3.65041	-3.65041	-3.65041	-3.65041	-3.65041	0.0255705	-0.197241
CAAA01154573.1	0.0353859	-0.432773	0.111391	-0.3589	-0.224479	-0.447722	0.0258031	-0.00240859	-0.0315919	-1.06574	-0.623458	-0.858531	1.33648	-1.08467	0.852801	-0.255015	-0.772481	1.43963
CAAA01180111.1	1.06731	0.834234	1.10101	0.784156	0.432844	1.23715	1.27452	0.953962	0.555898	0.662324	0.977528	1.47045	0.489952	-1.39187	0.961409	2.21785	-0.944972	1.23526
CAAA01180111.2	2.05606	1.94782	1.73533	2.1355	1.70278	1.53475	1.68637	1.78624	2.07624	1.48608	2.0142	2.29374	1.92454	1.08019	1.72846	0.894055	2.11472	-2.04397
CAAA01187608.2	6.15929	4.69877	5.13856	5.7419	5.82585	5.09765	5.87221	6.43602	6.80989	6.38573	5.26659	5.16606	5.89763	6.84999	5.78124	5.18992	5.69019	6.01719
CAAA01194877.2	-3.65041	-1.92984	-1.99605	-1.89508	-2.73497	-3.07372	-3.15847	-2.86527	-2.46293	-3.05578	-1.39083	-2.74135	-2.84082	-3.09152	-0.152728	-0.782197	-0.29931	-3.65041
CAAA01201205.3	0.886311	1.44596	1.42889	1.56908	1.16062	1.68805	1.33684	1.03932	1.11683	0.810024	1.78711	1.14979	1.88059	1.74586	2.96019	1.77151	1.61147	2.72589
Caap1	3.19827	3.38818	3.34646	3.12862	3.23728	3.07974	3.28757	3.18944	3.15333	3.02915	3.02017	3.12898	3.17173	2.87808	3.37491	3.25684	3.39071	4.18245
Cab39	6.59499	6.60582	6.45941	6.49358	6.29274	6.46349	6.67942	6.73609	6.70734	6.7076	6.56643	6.67792	6.36846	6.38957	6.50002	6.6342	6.48981	6.55284
Cab39l	4.95713	5.0821	5.00488	5.05118	5.13701	4.91714	5.14618	4.92365	5.0756	5.09599	5.17332	5.1885	5.32611	5.32263	5.10232	5.44406	5.14042	5.41064
Cabin1	8.20731	8.24552	8.13041	8.11663	7.97978	8.08408	7.99435	7.97009	7.88788	7.95269	7.93632	7.87155	8.17255	8.31466	8.01166	8.32932	8.0621	8.1238
Cables1	2.42607	2.35253	2.71703	2.83926	2.84802	1.86277	1.82458	2.14582	1.87753	1.99251	2.24979	1.98532	2.57389	2.1661	2.36058	2.44165	1.09224	1.71481
Cables2	4.93862	5.08197	5.26283	5.45115	5.70008	5.08457	5.11365	4.9038	4.83593	4.99118	4.8878	4.98683	4.79845	4.61889	5.09522	4.92663	4.71009	4.18676
Cabp1	0.0298542	0.446176	0.616873	-0.714399	0.854869	1.05349	-1.31034	-0.887834	-0.607872	0.586297	0.183478	-0.646342	-0.838592	-3.65041	-0.390442	-1.72414	-0.174717	-3.65041
Cabp5	-1.03646	-0.825951	-3.65041	-0.372972	-2.00575	-1.8815	-1.28737	-1.29354	-0.393472	-0.53751	-0.631865	-0.744309	-2.12345	-0.224608	-3.65041	-3.65041	-3.65041	-2.40958
Cabs1	-3.65041	-3.65041	-3.65041	-3.65041	-3.65041	-3.65041	-3.65041	-3.65041	-3.65041	-3.65041	-3.65041	-3.65041	7.89189	7.3918	8.91113	8.36272	8.32506	9.27606
Cabyr	-0.0266615	-0.00906394	0.0883653	0.637442	0.963277	-0.0883197	0.238592	0.36648	0.48775	-0.232015	-0.549926	0.493526	5.79514	5.43496	6.84497	6.17114	6.58871	6.74471
Cacfd1	4.33595	4.43035	4.30972	4.03812	4.03397	4.2882	4.3275	4.34706	4.20903	4.34117	4.47607	4.0783	4.00223	4.06144	3.66643	3.77454	3.97941	3.88136
Cachd1	1.51815	1.51526	1.27424	0.705985	1.39159	1.22995	2.00172	2.50177	2.12416	1.6686	2.30588	2.4959	-3.65041	-1.0171	-0.902003	-3.65041	-2.14408	-0.563228
Cacna1a	5.12478	5.43013	5.2295	5.24418	4.57619	4.89777	4.25601	4.12503	3.74132	4.06824	3.94405	4.16266	5.33685	5.22413	5.11489	5.09566	4.68565	4.11173
Cacna1b	5.26646	5.43573	5.06932	5.2538	5.10379	5.0391	4.88314	4.61105	4.65977	4.88412	4.85245	4.57157	5.41251	5.46923	5.25914	5.44794	5.08261	6.08036
Cacna1c	4.61573	4.74278	4.66889	5.06756	5.07931	4.86985	3.62948	3.55695	3.49455	3.99	4.06633	3.63602	5.20989	5.0684	5.07645	4.75224	4.92375	4.62476
Cacna1d	3.79952	3.83301	3.86552	4.17438	3.29495	3.72095	2.85354	2.17647	2.12304	2.41247	2.5107	2.44031	3.42541	4.31762	3.98551	3.72734	4.29652	4.07503
Cacna1e	1.99491	2.20207	1.54338	2.32066	1.60241	1.93247	0.738518	1.18897	0.379085	0.881749	0.935474	1.29865	3.70482	3.06506	3.8357	3.34578	2.72	2.40061
Cacna1g	0.820552	1.12569	0.400251	0.409801	0.610054	1.36978	0.556867	1.49342	0.934295	1.93237	1.79654	1.78039	0.763941	1.22675	-3.65041	-1.08939	-1.73919	0.220779
Cacna1h	6.57632	6.52707	6.5145	6.85841	6.3251	6.32957	6.15586	6.04756	6.01308	6.19694	6.09389	6.0253	6.27797	6.3252	6.0442	5.88445	5.59429	5.34067
Cacna1i	0.943329	1.26024	1.121	0.637442	0.963277	0.880281	0.524778	0.231441	-0.00680129	0.86897	0.560755	-0.727512	-0.0309192	0.522142	-0.573907	0.0392277	-1.42338	-3.65041
Cacna1s	-1.49747	-2.54753	-1.39984	-2.68663	-2.17934	-2.08204	-1.43102	-1.56137	-1.82053	-0.71853	-0.811183	-1.97479	-0.219423	0.483784	-0.0814637	-2.38716	0.935193	-0.960363
Cacna2d1	3.68056	3.92531	3.82256	4.08037	3.7831	3.93651	4.04851	3.89833	3.98016	3.68654	4.13576	3.95073	3.79293	3.23635	3.9258	3.57906	3.81558	4.06102
Cacna2d2	2.49895	2.24999	2.57206	2.67458	2.61363	2.31597	2.00986	1.69807	1.90522	2.19806	1.85937	1.57739	2.02358	2.01156	2.34643	0.854561	1.62525	1.1354
Cacna2d3	0.788153	0.999456	1.40346	1.9071	2.53588	1.3027	0.76623	-0.271572	0.828065	1.28432	1.44339	0.0333558	1.56411	0.73306	0.337942	-1.08939	1.72459	0.677758
Cacna2d4	0.301816	1.08897	-0.49769	-0.351915	-0.361644	0.308066	0.0664946	0.32064	-0.288157	0.0766301	-0.66599	0.370202	1.41642	1.70976	1.51971	1.38469	0.0564063	0.682646
Cacnb1	3.76289	3.73672	3.43468	3.16499	2.90486	3.24429	3.55993	3.54632	3.28966	3.48723	3.68152	3.48478	3.6145	4.55788	4.53414	4.39506	4.48729	4.89336
Cacnb2	-0.762454	-0.537346	0.303591	-0.467948	0.96849	-1.07429	-0.526043	-1.44368	-2.0046	-0.164777	-0.125196	-2.18802	0.81399	-1.89952	-2.55014	-3.65041	-0.0600335	0.725906
Cacnb3	3.90148	4.05262	3.89111	4.60064	4.06167	3.82461	3.71728	3.55022	3.46384	3.73136	3.75952	3.70183	3.22819	2.73027	2.44747	2.03365	2.49837	2.72115
Cacnb4	1.16138	1.51218	1.06313	1.20943	0.882744	2.01161	0.968242	1.06735	0.177535	0.46417	1.29607	1.52403	1.53456	2.45095	2.59616	2.51385	1.40335	2.48976
Cacng2	-1.81817	-1.86436	-1.62869	-1.8354	-1.34493	-1.31995	-3.65041	-2.19844	-2.66531	-2.5306	-2.55512	-1.08583	-0.345609	-2.2157	-1.59874	-0.396092	-2.0535	-1.03865
Cacng3	-3.65041	-3.65041	-3.65041	-3.65041	-3.65041	-3.65041	-3.65041	-3.65041	-2.76156	-3.65041	-3.65041	-3.12543	-0.323796	-3.65041	-3.65041	-0.217118	-3.65041	-3.65041
Cacng4	4.02931	4.03073	3.684	3.8869	3.1845	3.61802	3.84069	4.23679	3.77531	3.91584	3.58189	3.82115	3.43264	3.99515	3.78416	3.2176	3.36425	4.08982
Cacng5	0.494859	-0.148278	0.35273	0.271904	0.823571	1.13287	-0.667174	-0.441714	0.220161	0.662324	0.557062	0.218105	-1.00218	1.24061	0.87447	-0.313796	-0.0600335	-0.0767101
Cacng6	0.636261	0.622134	0.588434	1.26501	0.491953	0.63332	-0.154701	-1.02484	-0.914074	-0.0210788	0.216632	0.119431	0.0211426	1.14061	0.399021	-2.88472	-1.73919	0.286466
Cacng7	3.06264	3.11639	3.0364	2.84687	2.56111	2.83269	2.22484	2.36409	1.78117	2.69996	2.6559	2.36399	2.13606	2.58382	2.94234	1.77621	2.01359	1.39566
Cacng8	0.538364	0.78661	0.76943	0.739072	0.826445	0.998033	-0.0689548	0.576085	0.133612	0.183702	0.183478	-0.569496	-3.65041	-0.0796955	-2.20897	-0.417421	-1.42338	0.349292
Cactin	5.90801	5.91162	5.61343	5.65029	5.71847	5.52801	5.68735	5.9655	6.17758	5.97919	5.8888	5.9804	4.80805	4.56938	4.1574	3.99741	4.23045	4.36075
Cacul1	6.57567	6.54737	6.50834	6.49243	6.34208	6.38196	6.56031	6.6006	6.67275	6.47244	6.46236	6.49267	6.04085	6.3488	5.92812	6.45783	6.60292	6.41003
Cacybp	7.38305	7.35225	7.17394	7.28188	7.25209	7.26715	7.8379	7.78921	7.70796	7.5648	7.58471	7.75738	7.01879	7.01058	6.99366	6.83709	7.0542	7.13962
Cad	8.28755	8.23772	8.27683	8.23588	8.12798	8.1508	8.44254	8.57739	8.50363	8.56604	8.45439	8.43834	7.48922	7.63656	7.18871	7.45727	7.49328	6.80401
Cadm1	6.54206	6.5421	6.51975	6.45843	6.75274	6.53037	6.64485	6.68625	6.71304	6.61611	6.65402	6.70906	6.56302	6.4272	6.17529	6.37137	6.62677	6.39903
Cadm2	-1.83827	-3.65041	-2.26587	-1.25072	-0.68264	-0.584956	-1.70769	-2.35968	-1.07999	-2.04619	-1.70878	-0.654257	-0.558353	-3.13862	-3.65041	-2.88472	0.506941	1.35031
Cadm3	-2.34156	-1.37955	-0.559991	-2.68663	-1.61426	0.0214442	-1.09559	-0.0403595	-1.51069	0.330741	-0.398812	-0.297489	-0.436313	-1.70975	-1.93324	-2.01789	-3.65041	-3.65041
Cadm4	3.78317	3.47376	3.54978	3.53881	3.70367	3.49472	3.60666	3.95032	4.06738	3.82116	3.85661	4.03589	2.97679	3.03222	2.81739	3.43104	3.03843	3.79372
Cadps	-0.0794907	-0.982171	0.0883653	-1.53722	-0.557497	0.189298	-0.519336	-0.481767	-1.25577	-0.454861	0.485029	0.0382749	-1.00218	-0.329992	1.49194	-2.38716	1.04177	-0.451914
Cadps2	4.52255	4.57955	4.42592	4.66726	4.96237	4.26313	4.09076	4.02547	3.71026	3.96395	3.77431	3.81543	4.33734	5.12682	4.94928	4.77122	4.8145	4.88039
Cage1	2.30535	1.95917	2.21884	2.45717	2.46205	1.95449	1.64218	1.44846	1.27682	0.900707	1.61307	1.45213	4.46068	4.88114	6.23426	5.94329	5.7828	6.32759
Calb1	-2.12865	-2.18574	-2.59805	-3.65041	-0.87462	-2.20682	-2.47433	-2.35968	-1.51069	-1.41053	-0.962002	-1.78906	-2.84082	-3.65041	-3.65041	0.0392277	-0.539456	0.522853
Calb2	0.136648	0.342517	-0.097149	0.368107	0.963277	0.0813724	0.588258	0.489954	0.882157	0.0766301	-0.0784867	0.128686	-1.18672	-0.263231	-3.65041	-0.927632	0.878801	-1.51017
Calcoco1	6.48509	6.38592	6.04676	6.04697	5.63632	6.01482	6.00054	6.18296	5.98547	6.09603	6.03702	6.00023	5.84413	5.96428	5.60126	6.01222	5.73813	4.80898
Calcoco2	-0.724562	-0.982171	-0.388676	-1.89508	-0.658334	-2.66284	-1.15673	-1.07647	-2.0046	-1.62876	-0.363384	-1.39502	-0.533105	0.31926	1.26467	0.20193	-2.1916	2.22244
Calcrl	-0.491929	-0.720782	0.189207	0.722623	0.0508244	0.409319	-0.134063	0.36002	-1.18732	-0.376691	-0.321987	-0.184295	-1.03725	-2.6897	1.67595	-2.30536	-3.65041	0.795242
Cald1	2.17234	1.58725	2.37089	2.47692	2.55246	2.95642	0.315634	2.49442	0.261563	4.14346	4.01677	3.20805	0.763941	0.083104	0.819675	-1.2716	0.558115	-3.65041
Calhm2	-0.968453	-0.742682	-0.310088	-1.0118	-0.224479	0.0269963	-1.09559	-1.33487	-2.21564	-1.62876	-0.0221499	-2.74135	-3.65041	-1.70975	-1.70186	-2.38716	-3.65041	-3.65041
Calm1	6.72439	6.71491	6.64899	6.57263	6.8805	6.74665	7.17652	7.35709	7.32938	7.09175	7.10776	7.23549	6.07973	5.76178	6.47046	5.97036	6.15342	6.35368
Calm2	8.0094	7.87745	7.8023	7.89001	8.03575	7.71534	8.45085	8.57357	8.39126	8.20393	8.16284	8.33594	6.97065	7.1263	6.81435	6.53098	7.11885	7.04493
Calm3	7.13871	7.00472	6.85967	6.93671	7.1189	6.96624	7.12594	7.36618	7.23445	7.28789	7.08746	7.19958	6.36951	6.57945	6.39204	6.32867	6.60835	6.30796
Calml4	-2.6613	-1.53648	-2.26587	-3.08949	-2.43057	-1.21138	-2.05031	-1.83017	-2.21564	-3.65041	-1.89859	-1.78906	-0.623477	-1.70975	0.74714	0.762721	1.32109	1.89407
Caln1	-1.30343	-1.53648	-1.10626	-0.696592	-2.43057	-1.07429	-1.19897	-2.16079	-0.842141	-1.62876	-0.692124	-0.694494	0.81399	-2.40425	-0.290609	-1.98568	-0.736797	1.09931
Calr	7.94703	7.83093	7.98869	7.89303	8.48387	8.05191	8.11311	8.18406	8.19253	8.04618	8.13137	8.11766	7.10864	7.31707	6.81136	6.61463	7.20945	7.38754
Calr3	1.13586	0.885103	0.347891	0.923087	1.48366	0.573873	0.3852	1.12564	0.522226	1.07773	0.667376	0.724701	2.42081	2.64594	4.58458	4.07583	4.71815	4.4383
Calr4	-0.210846	-0.302374	0.0883653	-0.627486	-0.893409	-0.584956	0.114719	-0.375537	0.0415375	-0.454861	0.320495	-0.496538	-1.6465	1.02783	-3.65041	-1.2716	-1.16443	0.903874
Calu	7.13464	7.12107	6.95519	6.9784	6.96691	6.92724	7.25774	7.33752	7.23763	7.26178	7.27303	7.26464	6.19517	6.43865	6.27557	6.28497	6.27571	6.39615
Caly	2.14829	1.88969	1.64156	1.61793	0.50636	2.20769	1.18906	0.899321	0.555898	0.83652	0.766657	1.33708	1.53456	1.9154	1.84279	2.44165	1.75623	3.02041
Camk1	-1.20885	-0.663958	-0.0326237	-0.0175587	0.882744	0.752056	0.458376	0.576085	0.713388	1.58707	1.20224	1.0989	-1.39837	-2.37576	-2.20897	-3.65041	-2.70898	0.576358
Camk1d	4.95422	4.99794	4.89824	4.72414	4.37721	4.82334	4.75328	4.70022	4.73408	4.66877	4.69437	4.75027	5.10624	5.03331	5.23527	5.14014	4.95784	3.92326
Camk1g	-1.20885	-0.602597	-0.559991	-1.70508	-1.61426	-1.34842	-1.09559	-0.887834	-1.82053	-0.302541	-1.39083	-2.18802	-2.84082	-0.329992	0.74322	-2.88472	-2.14408	-3.65041
Camk2a	-2.6613	-1.77138	-2.59805	-1.70508	-1.22109	-1.6691	-2.7923	-0.812932	-3.13859	-3.05578	-2.37498	-3.65041	-2.84082	-1.25584	-0.573907	-0.313796	-0.944972	0.286466
Camk2b	3.06534	3.22522	3.12109	3.31681	3.1659	2.85471	2.93577	3.15207	3.23511	2.75742	2.72006	3.12956	1.10682	2.36492	1.89673	1.99381	1.7749	1.78467
Camk2d	2.62354	2.56948	2.78126	2.99119	2.6667	2.80872	2.73022	2.15518	2.57207	2.8538	2.60046	2.13059	2.33771	1.98571	3.20716	2.74741	2.18617	2.0889
Camk2g	5.43092	5.50832	5.34996	5.58332	5.19916	5.34022	4.98187	4.96121	4.81748	4.91339	4.9133	5.17865	5.54381	5.81691	5.30657	5.45107	4.96801	4.05585
Camk2n1	4.99666	4.92587	4.79868	5.12501	4.54426	4.55593	4.79423	4.74445	4.95144	4.88213	4.84887	4.46829	4.6448	4.93545	4.69018	4.27595	4.83391	4.89862
Camk2n2	0.614252	1.02128	1.35605	-0.132555	0.854869	0.910632	1.18906	1.52264	1.08027	1.15871	0.918303	1.59252	-1.00218	-1.25584	0.389019	1.13654	1.62525	-2.90052
Camk4	2.47574	2.23045	2.94883	2.94868	3.45854	2.39216	2.26328	2.38731	1.89342	1.79726	1.96069	1.80946	3.07653	3.53207	4.46292	3.78742	3.94068	4.58289
[truncated: 19,219 more rows]

## Sheet: DGE_analysis_PND15_vs_PND8_all
Genes	logFC	AveExpr	t	P.Value	adj.P.Val	B
Eif4g3	1.95906	6.49322	21.7648	5.22385e-12	8.91189e-08	17.9715
Nav1	-1.3864	6.07944	-16.7006	1.72726e-10	1.47335e-06	14.5511
Med12l	1.12351	4.71252	15.1406	6.19232e-10	3.52136e-06	13.2639
Arid4a	-0.988047	5.38714	-14.7076	9.01323e-10	3.84414e-06	12.9113
Hspa8	-0.559426	10.7853	-14.3058	1.28827e-09	4.23265e-06	12.3899
Hmgcr	-0.54757	6.8322	-14.1378	1.4998e-09	4.23265e-06	12.3583
Sfrp2	-1.45522	5.74492	-13.9621	1.76126e-09	4.23265e-06	12.2334
Dnah8	1.22823	5.70214	13.4868	2.74474e-09	4.23265e-06	11.7873
Rpl39	-0.883703	4.49855	-13.3587	3.1007e-09	4.23265e-06	11.685
Hist2h3c2	-1.26624	6.2413	-13.3818	3.03295e-09	4.23265e-06	11.6666
Hspe1	-0.535122	7.45251	-13.3175	3.22535e-09	4.23265e-06	11.5444
Uggt2	1.24191	3.22004	13.3293	3.18902e-09	4.23265e-06	11.5262
Utp3	-0.608346	6.63849	-13.1732	3.70597e-09	4.51598e-06	11.4386
Aldoa	-0.842055	7.05665	-12.6548	6.17247e-09	6.58139e-06	10.898
Dnah7b	1.02923	4.86995	12.3825	8.12776e-09	7.64279e-06	10.7259
Nlrp5-ps	1.60385	2.26777	12.7349	5.69797e-09	6.48049e-06	10.6758
Dusp9	-0.849735	5.77103	-12.3501	8.40061e-09	7.64279e-06	10.6518
Hmcn1	1.01967	4.4267	12.2599	9.21517e-09	7.64279e-06	10.6097
Cfap54	1.96188	1.30447	13.7204	2.20329e-09	4.23265e-06	10.5671
Ppia	-0.607171	8.742	-12.3319	8.55855e-09	7.64279e-06	10.4828
Dync2h1	0.753742	6.93365	12.2398	9.40789e-09	7.64279e-06	10.4716
Tubg1	-0.663004	6.54533	-12.0299	1.16968e-08	8.67595e-06	10.2658
P4hb	-0.428886	8.63296	-11.9667	1.24965e-08	8.88292e-06	10.0938
Mcm10	-0.714667	6.49586	-11.86	1.39841e-08	9.38791e-06	10.0838
Syt14	0.508605	5.17136	11.734	1.59865e-08	9.52658e-06	10.0302
Ccnf	-0.581572	6.45925	-11.7729	1.53372e-08	9.52658e-06	9.99398
Sept11	-0.866497	5.83703	-11.7219	1.61941e-08	9.52658e-06	9.97647
G3bp1	-0.45749	6.78222	-11.6897	1.67608e-08	9.5313e-06	9.88289
Syn1	-1.33653	2.35547	-11.8384	1.43075e-08	9.38791e-06	9.88287
Lama3	-0.714218	4.47582	-11.5253	2.00076e-08	9.926e-06	9.83793
Plxnd1	-0.578745	6.71652	-11.6401	1.76777e-08	9.72843e-06	9.83376
Rpusd3	-1.02025	2.93695	-11.4766	2.10936e-08	9.926e-06	9.70738
Sqle	-0.510994	5.65555	-11.4417	2.19098e-08	9.926e-06	9.67751
Syngap1	0.82351	5.29446	11.4095	2.26913e-08	9.926e-06	9.66555
Bin1	-1.01342	4.03171	-11.322	2.49761e-08	1.0145e-05	9.62674
Insig1	-0.513787	6.11482	-11.4132	2.26016e-08	9.926e-06	9.61908
Sept7	-0.461684	7.29497	-11.4146	2.25667e-08	9.926e-06	9.54608
Mcm6	-0.516911	7.91568	-11.4384	2.19874e-08	9.926e-06	9.54175
Psmc1	-0.47473	7.58693	-11.4203	2.24268e-08	9.926e-06	9.53592
Pfn1	-0.540609	6.96705	-11.3609	2.39325e-08	9.95826e-06	9.50437
Sdccag8	0.63131	3.9145	11.2052	2.84119e-08	1.08352e-05	9.49952
Phf11c	-1.29068	4.07977	-11.1978	2.86446e-08	1.08352e-05	9.49146
Cacna1c	1.14955	4.32299	11.18	2.92158e-08	1.08352e-05	9.46917
Hsp90aa1	-0.402578	10.8309	-11.3689	2.37224e-08	9.95826e-06	9.35171
St14	-1.35855	2.70524	-11.1208	3.12058e-08	1.13271e-05	9.3177
Gapdh	-0.603597	8.45015	-11.2516	2.69901e-08	1.07082e-05	9.30297
Ppp1r9a	0.716285	5.37343	11.0713	3.29819e-08	1.17223e-05	9.27855
Vps13b	0.497739	7.29065	10.9857	3.63069e-08	1.26407e-05	9.05823
Nbea	0.413101	6.95288	10.9602	3.73659e-08	1.27493e-05	9.04574
Ank1	-1.40279	2.81737	-10.8038	4.46235e-08	1.33557e-05	8.98979
Ccnb1	-0.827711	6.32073	-10.8341	4.31126e-08	1.33557e-05	8.944
Pkd1	0.496325	6.61476	10.8351	4.30607e-08	1.33557e-05	8.91964
Hist1h1e	-1.29281	6.8944	-10.8121	4.42068e-08	1.33557e-05	8.87438
Arhgef5	-1.0482	3.97492	-10.6119	5.56469e-08	1.55706e-05	8.83394
Eif4a3	-0.429001	7.56256	-10.8101	4.4305e-08	1.33557e-05	8.83322
Ttbk1	1.10153	4.05958	10.5766	5.79703e-08	1.55706e-05	8.79072
Ube2s	-0.639427	6.76601	-10.71	4.9688e-08	1.46151e-05	8.76115
Fendrr	1.35234	2.75918	10.5851	5.74006e-08	1.55706e-05	8.75505
Mrpl17	-0.478017	5.375	-10.6203	5.51046e-08	1.55706e-05	8.75006
Hnrnpab	-0.549697	9.17552	-10.807	4.44618e-08	1.33557e-05	8.74573
Ltbp1	1.05958	3.62118	10.4473	6.74087e-08	1.57893e-05	8.64975
Bcl6b	-1.09276	5.4127	-10.5221	6.17658e-08	1.57272e-05	8.64048
Ap1m2	-1.21194	2.24461	-10.5436	6.02378e-08	1.55706e-05	8.6119
Rab11fip5	0.96262	3.4115	10.4153	6.99945e-08	1.57893e-05	8.60965
Pold1	-0.421081	7.38744	-10.6019	5.62953e-08	1.55706e-05	8.59518
Plekha6	1.50725	4.16548	10.4049	7.0851e-08	1.57893e-05	8.59405
Arpc4	-0.74061	4.72276	-10.4243	6.92513e-08	1.57893e-05	8.57672
Msmo1	-0.861466	5.10357	-10.415	7.00117e-08	1.57893e-05	8.53718
Hist1h3b	-0.738811	7.80098	-10.5556	5.94027e-08	1.55706e-05	8.51699
Reln	1.14163	6.96677	10.4945	6.37859e-08	1.57893e-05	8.49154
Asxl3	0.76764	4.05726	10.3155	7.87387e-08	1.64825e-05	8.48229
Aars	-0.502412	7.42829	-10.4678	6.58093e-08	1.57893e-05	8.4284
Nudt3	-0.449056	6.39473	-10.3776	7.31711e-08	1.58013e-05	8.38351
Uba1	-0.38039	7.88648	-10.428	6.89533e-08	1.57893e-05	8.35704
Kifc3	0.82848	3.28172	10.175	9.30741e-08	1.78323e-05	8.3309
Incenp	-0.61285	7.71509	-10.3864	7.24082e-08	1.58013e-05	8.31292
Atp5a1	-0.481479	8.19359	-10.4	7.12646e-08	1.57893e-05	8.30367
Impdh2	-0.455735	7.60299	-10.3533	7.52946e-08	1.60566e-05	8.27901
Uhrf1	-0.662134	7.84173	-10.3103	7.92244e-08	1.64825e-05	8.21288
Idi1	-0.927589	5.99984	-10.1931	9.10825e-08	1.78323e-05	8.19728
Cenpm	-0.882947	3.41059	-10.0589	1.07023e-07	1.94235e-05	8.19542
Mcm4	-0.471755	7.219	-10.2637	8.37304e-08	1.72101e-05	8.19417
Hn1	-0.607369	5.82694	-10.1809	9.24284e-08	1.78323e-05	8.18924
Ndufs4	-0.443137	5.76743	-10.1661	9.40743e-08	1.78323e-05	8.17023
Dhcr24	-0.588668	6.86183	-10.2193	8.82831e-08	1.78323e-05	8.15912
Cops6	-0.447913	6.2524	-10.1545	9.53943e-08	1.78838e-05	8.12655
Ptprs	0.48052	7.70039	10.1965	9.07131e-08	1.78323e-05	8.07857
Sod1	-0.496796	7.84617	-10.1921	9.11899e-08	1.78323e-05	8.06408
Atxn1	1.26951	2.51836	9.99506	1.15629e-07	2.05175e-05	8.05766
Ftl1	-0.713115	7.89929	-10.1239	9.89681e-08	1.83521e-05	7.98116
Rpl36a-ps2	-0.505285	6.46415	-10.0441	1.08958e-07	1.95665e-05	7.96681
Ndufv1	-0.535038	7.03824	-10.0746	1.05017e-07	1.92644e-05	7.96414
Trim6	-0.955675	5.8785	-9.96294	1.20234e-07	2.09305e-05	7.9136
Wdr66	1.73608	0.861759	10.5623	5.89371e-08	1.55706e-05	7.91158
Aim1	1.12782	5.41953	9.91506	1.27462e-07	2.1745e-05	7.89114
Hist2h3b	-1.31024	6.63578	-9.98776	1.16659e-07	2.05175e-05	7.87787
Tmc3	-0.907545	2.36202	-9.83464	1.40665e-07	2.32694e-05	7.84896
Lyst	0.476081	6.82711	9.94477	1.22924e-07	2.11827e-05	7.81885
Ccdc60	1.86488	0.810411	10.4504	6.71639e-08	1.57893e-05	7.80595
Wwc2	0.779943	5.69792	9.82309	1.42677e-07	2.32694e-05	7.75401
Slc25a5	-0.985019	5.16264	-9.77638	1.51133e-07	2.42885e-05	7.73878
RP23-396N4.2	0.889363	4.04894	9.66356	1.73835e-07	2.4795e-05	7.6922
Prtg	1.12047	5.54292	9.7578	1.54644e-07	2.43373e-05	7.68092
Tuba1b	-0.523228	6.16797	-9.76996	1.52337e-07	2.42885e-05	7.65276
Nf1	0.44298	7.4345	9.84373	1.39101e-07	2.32694e-05	7.651
Tmsb10	-0.516898	7.20954	-9.8257	1.42219e-07	2.32694e-05	7.64534
Fam84b	-1.41941	2.39551	-9.62449	1.8252e-07	2.4795e-05	7.62052
Sash1	0.962932	5.16581	9.65128	1.76517e-07	2.4795e-05	7.5777
Rpgrip1l	0.506674	4.98721	9.63033	1.81194e-07	2.4795e-05	7.56716
Cnpy2	-0.597218	3.95636	-9.53949	2.03052e-07	2.58047e-05	7.54564
Rfc4	-0.472807	5.68687	-9.64964	1.76879e-07	2.4795e-05	7.53274
Kpna2	-0.632604	7.4547	-9.74598	1.56923e-07	2.43373e-05	7.52816
Actb	-0.395634	9.77526	-9.82002	1.43217e-07	2.32694e-05	7.50064
Pitrm1	-0.503679	5.67084	-9.62183	1.83128e-07	2.4795e-05	7.49711
Iqub	1.70036	1.43188	9.74887	1.56363e-07	2.43373e-05	7.48782
Rpl10a-ps1	-0.352744	7.18768	-9.70155	1.65812e-07	2.4795e-05	7.47819
Txnrd1	-0.633507	6.35436	-9.64624	1.77631e-07	2.4795e-05	7.46648
Etf1	-0.551183	7.23378	-9.68825	1.68574e-07	2.4795e-05	7.4635
Ubxn2a	0.991078	2.9618	9.45569	2.25711e-07	2.63742e-05	7.45425
Aff4	0.704274	5.6503	9.58346	1.92141e-07	2.54102e-05	7.44901
Smc1a	-0.424816	7.05653	-9.66304	1.73949e-07	2.4795e-05	7.43648
Taf7	-0.440598	7.64759	-9.68834	1.68555e-07	2.4795e-05	7.43416
Wwc1	-0.617894	5.25415	-9.53839	2.03332e-07	2.58047e-05	7.42809
RP23-161B9.5	-0.465271	6.62541	-9.62718	1.81909e-07	2.4795e-05	7.41713
Cacybp	-0.403339	7.53872	-9.65671	1.75326e-07	2.4795e-05	7.40056
Agrn	0.572989	5.57711	9.5223	2.07496e-07	2.58047e-05	7.37542
Hsp90b1	-0.355772	9.41854	-9.68901	1.68415e-07	2.4795e-05	7.34459
Cpt1a	0.587645	5.29358	9.47936	2.19051e-07	2.62412e-05	7.3418
Hist1h1d	-0.721631	7.28214	-9.5948	1.89429e-07	2.52473e-05	7.33753
Hist2h2bb	-1.1631	6.06511	-9.51756	2.08737e-07	2.58047e-05	7.31996
Ccnb2	-0.716794	5.54443	-9.477	2.19707e-07	2.62412e-05	7.31924
Sulf1	0.990743	3.57679	9.33124	2.64457e-07	2.88553e-05	7.30053
Tra2b	-0.370069	7.44341	-9.57088	1.95199e-07	2.56161e-05	7.29744
Cks2	-0.547306	5.30694	-9.4271	2.34044e-07	2.71619e-05	7.28566
Dnah17	1.69679	1.42377	9.67126	1.72176e-07	2.4795e-05	7.27346
Elovl6	-0.739437	5.01945	-9.39015	2.45303e-07	2.78991e-05	7.25824
Jpt2	-0.407371	6.07212	-9.46418	2.23298e-07	2.62722e-05	7.2562
Tex19.1	-0.533408	7.02953	-9.50714	2.11498e-07	2.59321e-05	7.2401
Hnrnpu	-0.328849	9.94781	-9.60289	1.87519e-07	2.51896e-05	7.21137
Nme1	-0.696858	5.90797	-9.40247	2.41487e-07	2.76494e-05	7.19621
Pygo1	1.33942	2.6735	9.2586	2.90293e-07	3.00145e-05	7.19107
Rpl3	-0.435505	9.03149	-9.52698	2.06276e-07	2.58047e-05	7.14997
Dock8	0.582288	4.6248	9.26753	2.86978e-07	2.98638e-05	7.13226
Ywhae	-0.356048	8.78706	-9.50225	2.12808e-07	2.59321e-05	7.12907
Psmd12	-0.395386	6.41149	-9.37418	2.50345e-07	2.80979e-05	7.10879
RP23-150G4.1	-0.543124	4.53601	-9.23396	2.99654e-07	3.02491e-05	7.10724
Epcam	-0.795431	5.93028	-9.33117	2.64482e-07	2.88553e-05	7.09034
Rps2	-0.515015	8.95989	-9.47609	2.19959e-07	2.62412e-05	7.08825
Rps4l	-0.538751	7.30655	-9.38376	2.47308e-07	2.79409e-05	7.06038
Gsta3	-0.916883	2.72955	-9.14269	3.37224e-07	3.21264e-05	7.05672
Efhb	1.3846	2.71753	9.13057	3.42576e-07	3.21264e-05	7.04482
Ctsf	0.643106	4.69989	9.20185	3.12339e-07	3.06613e-05	7.04262
Hist1h3c	-0.933033	5.90796	-9.27682	2.83569e-07	2.98638e-05	7.03144
Ran	-0.492407	8.37238	-9.41205	2.38562e-07	2.74991e-05	7.03022
Mn1	-0.737361	4.93424	-9.20491	3.11104e-07	3.06613e-05	7.02308
Cacna1d	1.39403	3.13177	9.09773	3.57538e-07	3.26182e-05	7.01372
Nin	-0.716735	4.10304	-9.12182	3.46498e-07	3.21264e-05	6.99161
Hsd17b12	-0.559814	6.18617	-9.26724	2.87084e-07	2.98638e-05	6.98127
Trap1a	-0.633196	5.88255	-9.23586	2.98922e-07	3.02491e-05	6.96283
Mdh2	-0.435552	8.36488	-9.36059	2.54724e-07	2.84026e-05	6.96089
Tpm3	-0.5402	8.16621	-9.34942	2.58383e-07	2.86235e-05	6.95833
Ube2l3	-0.442763	6.25772	-9.24652	2.94843e-07	3.01244e-05	6.95567
Hist1h2an	-0.960915	5.60612	-9.21304	3.07855e-07	3.06613e-05	6.95476
Chd3	0.544334	7.63909	9.31907	2.6861e-07	2.90031e-05	6.95131
Ercc6l	-0.419622	5.56822	-9.19646	3.14522e-07	3.06614e-05	6.94945
Sf3a3	-0.349827	7.33453	-9.29978	2.75334e-07	2.93575e-05	6.94337
Slc16a13	-1.04198	2.62531	-9.04284	3.84126e-07	3.43099e-05	6.93041
Myo7a	0.645233	6.77807	9.2464	2.94888e-07	3.01244e-05	6.91103
Hist1h4d	-0.709293	8.03835	-9.3019	2.74585e-07	2.93575e-05	6.90652
Rbm3	-0.478557	6.19989	-9.20089	3.12724e-07	3.06613e-05	6.9062
Prim1	-0.729879	5.00335	-9.10727	3.53124e-07	3.23887e-05	6.89153
Dstyk	0.522176	5.08771	9.11101	3.51408e-07	3.23887e-05	6.88901
RP23-243E17.1	0.43108	9.04284	9.32802	2.6555e-07	2.88553e-05	6.885
Cct6a	-0.431889	7.84718	-9.27187	2.85379e-07	2.98638e-05	6.87833
Hecw2	0.802392	3.63498	8.9879	4.12845e-07	3.59344e-05	6.85313
Cacna1a	1.06277	4.60579	9.05129	3.79899e-07	3.41109e-05	6.84384
RP24-132A22.2	-0.622293	4.17741	-9.00275	4.0486e-07	3.56027e-05	6.83165
Rraga	-0.619892	4.80096	-9.03824	3.86444e-07	3.43372e-05	6.8156
Cdca8	-0.476401	6.05256	-9.12489	3.45116e-07	3.21264e-05	6.80731
Cpne5	0.546276	4.70852	8.99106	4.11131e-07	3.59344e-05	6.76076
Slc3a2	-0.379315	6.69271	-9.12384	3.45587e-07	3.21264e-05	6.75525
Ctps	-0.364526	7.06958	-9.13561	3.40338e-07	3.21264e-05	6.74468
Thoc6	-0.584061	4.2222	-8.91775	4.5287e-07	3.82473e-05	6.71388
Tuba3b	-0.7783	7.81644	-9.13248	3.41727e-07	3.21264e-05	6.69739
Rbm15b	-0.564435	5.16385	-8.97568	4.19533e-07	3.5966e-05	6.69237
Ncapd2	-0.412604	8.09642	-9.14461	3.36382e-07	3.21264e-05	6.69138
Tacc3	-0.499446	6.45063	-9.0589	3.76134e-07	3.39516e-05	6.68729
Ccdc39	1.0401	2.73376	8.83447	5.05803e-07	4.10905e-05	6.67236
Cry2	0.539706	5.00311	8.9444	4.37198e-07	3.71075e-05	6.66667
Cct8	-0.369682	8.10361	-9.12386	3.45578e-07	3.21264e-05	6.66108
Gpat2	-0.38813	6.01448	-9.01564	3.98067e-07	3.51867e-05	6.65979
Kdf1	-0.530608	3.75411	-8.8345	5.05779e-07	4.10905e-05	6.6454
Fgl1	-0.845794	2.51698	-8.80968	5.22795e-07	4.19063e-05	6.6339
Fam111a	-0.983304	3.20328	-8.79915	5.30201e-07	4.19063e-05	6.62475
Hist1h2bn	-0.959594	5.25914	-8.90745	4.59086e-07	3.85813e-05	6.6167
Gars	-0.378094	7.91857	-9.08225	3.64834e-07	3.31068e-05	6.61438
Ldlr	-0.759252	5.84991	-8.951	4.33407e-07	3.69697e-05	6.59042
Zfr2	0.951851	2.65286	8.77128	5.50335e-07	4.25967e-05	6.58732
Crlf1	-1.15662	3.91309	-8.79861	5.30584e-07	4.19063e-05	6.58316
Rragb	1.0159	1.68372	8.84211	5.00681e-07	4.10654e-05	6.52765
Pclaf	-0.988617	3.29383	-8.72324	5.86963e-07	4.41217e-05	6.52383
Myo6	0.620713	4.35548	8.76765	5.53011e-07	4.25967e-05	6.49612
Slc38a9	0.497047	4.43038	8.76591	5.54306e-07	4.25967e-05	6.49175
Hoxb6	-1.41489	1.59958	-8.79017	5.366e-07	4.21862e-05	6.4916
Plekhh3	-1.47689	4.09518	-8.7382	5.75289e-07	4.37764e-05	6.47939
Pif1	-1.0842	3.0255	-8.6828	6.1981e-07	4.51878e-05	6.47636
Mcm7	-0.491881	8.01509	-8.97813	4.18183e-07	3.5966e-05	6.46503
Atp8a2	0.79999	3.61712	8.69588	6.0898e-07	4.4781e-05	6.45955
Pnn	-0.43629	8.12982	-8.97673	4.18955e-07	3.5966e-05	6.45462
Apex1	-0.494294	5.99531	-8.85575	4.91681e-07	4.07188e-05	6.44708
Dlc1	-0.547006	5.50966	-8.80458	5.26369e-07	4.19063e-05	6.42439
Psmd11	-0.47504	6.58661	-8.84521	4.9862e-07	4.10654e-05	6.38632
Anapc15	-0.447252	5.98618	-8.81247	5.20856e-07	4.19063e-05	6.38066
Hoxc4	2.39178	0.23216	9.62265	1.82942e-07	2.4795e-05	6.37643
Cct7	-0.303354	7.96311	-8.88879	4.70573e-07	3.93528e-05	6.34675
Rrp15	-0.523431	5.98279	-8.77025	5.51095e-07	4.25967e-05	6.32089
Eif3d	-0.416142	8.04258	-8.86414	4.86229e-07	4.04637e-05	6.30518
Ifih1	1.72985	1.90212	8.60631	6.87384e-07	4.78644e-05	6.30084
Fbxo32	0.897044	5.44457	8.70801	5.99111e-07	4.44384e-05	6.29668
Usp22	-0.368064	7.28909	-8.80907	5.23222e-07	4.19063e-05	6.28215
Aldh16a1	-0.552773	4.71119	-8.62904	6.66521e-07	4.71016e-05	6.27147
Fem1a	-0.769572	3.88339	-8.56378	7.28297e-07	4.98986e-05	6.2659
RP23-16G3.1	-0.912774	5.54926	-8.67812	6.23737e-07	4.52806e-05	6.26243
Ung	-0.451141	5.9888	-8.71336	5.94816e-07	4.43125e-05	6.24918
Mta2	-0.356765	6.50123	-8.73553	5.77356e-07	4.37764e-05	6.23838
Hist2h2ac	-1.14648	5.71608	-8.68985	6.13945e-07	4.49524e-05	6.2343
U2af1	-0.509089	5.94616	-8.70159	6.0431e-07	4.463e-05	6.23165
Fdps	-0.561191	7.11122	-8.75808	5.60148e-07	4.28526e-05	6.22073
Actn1	-0.788766	5.4388	-8.6525	6.45693e-07	4.62713e-05	6.21811
Chmp2a	-0.420604	6.38514	-8.71765	5.91395e-07	4.42509e-05	6.21452
AC158971.1	0.421829	7.46809	8.7695	5.51643e-07	4.25967e-05	6.21176
Tmem59l	-0.883427	3.98118	-8.51727	7.76019e-07	5.21216e-05	6.19569
B4gat1	-0.874801	3.52519	-8.48681	8.09056e-07	5.37062e-05	6.19134
Wnt3	-1.05119	2.30278	-8.47125	8.26511e-07	5.46523e-05	6.17149
Poldip3	-0.345313	7.52173	-8.72309	5.87083e-07	4.41217e-05	6.14619
Ercc4	1.08421	2.1122	8.443	8.59221e-07	5.49341e-05	6.12144
Slfn5	-1.29802	3.75811	-8.43351	8.70517e-07	5.54142e-05	6.10597
Cyct	-0.599569	3.9342	-8.44678	8.54758e-07	5.49341e-05	6.09569
Rpl38	-0.490246	7.00324	-8.65891	6.40125e-07	4.60782e-05	6.08972
Sec63	-0.332683	6.91013	-8.6496	6.48233e-07	4.62713e-05	6.08015
Zbtb38	0.54229	5.0878	8.52457	7.68314e-07	5.20137e-05	6.0787
F2r	-1.10963	3.06206	-8.37279	9.46603e-07	5.80901e-05	6.05912
Parp4	0.801438	4.07728	8.39189	9.21938e-07	5.71295e-05	6.01043
Atp5g1	-0.503739	5.00286	-8.46064	8.38637e-07	5.49341e-05	6.00076
Pde4d	1.10158	1.96113	8.36567	9.55976e-07	5.8455e-05	6.0007
Armcx4	0.909364	4.81159	8.44415	8.5786e-07	5.49341e-05	5.9951
Rpl7	-0.348216	8.30499	-8.64502	6.52257e-07	4.63646e-05	5.98722
Serbp1	-0.401712	8.85101	-8.66914	6.31342e-07	4.56385e-05	5.98579
RP23-326E2.4	-0.971719	2.7838	-8.31066	1.03182e-06	6.15484e-05	5.97939
Tgfb1	-0.858452	4.62853	-8.41	8.9918e-07	5.63971e-05	5.96227
Ndc80	-0.477758	6.53616	-8.54216	7.50082e-07	5.09817e-05	5.96043
Chd5	0.756663	4.90907	8.41611	8.91628e-07	5.61298e-05	5.94774
Actn2	0.554755	4.95011	8.42821	8.76883e-07	5.5612e-05	5.94251
Cct5	-0.41689	8.7467	-8.62676	6.68585e-07	4.71016e-05	5.93402
Ddx4	-0.376201	8.41764	-8.6107	6.83295e-07	4.77747e-05	5.93002
Ddx49	-0.470126	5.44584	-8.44536	8.56432e-07	5.49341e-05	5.92971
H2afz	-0.491587	6.15723	-8.49656	7.98324e-07	5.32008e-05	5.92827
Anks1b	1.02515	3.45244	8.2802	1.07652e-06	6.29928e-05	5.90969
Bbx	0.879109	4.68587	8.36209	9.60737e-07	5.85364e-05	5.90857
Sapcd2	-0.586668	3.8114	-8.30148	1.04508e-06	6.19237e-05	5.90729
Lig1	-0.438216	8.04801	-8.56809	7.24032e-07	4.98064e-05	5.89041
Sfpq	-0.282032	8.80101	-8.59185	7.01012e-07	4.84181e-05	5.88514
Vps13d	0.339068	7.39322	8.51878	7.74419e-07	5.21216e-05	5.86722
Adam23	0.985858	3.98558	8.28253	1.07303e-06	6.29928e-05	5.85947
Arhgap11a	-0.560339	5.63192	-8.4022	9.08906e-07	5.6591e-05	5.85007
Akt3	0.422061	6.43972	8.45065	8.5023e-07	5.49341e-05	5.84021
Psmc2	-0.401879	6.22021	-8.42017	8.86657e-07	5.60236e-05	5.81453
Ncl	-0.428116	10.6105	-8.59335	6.99586e-07	4.84181e-05	5.81289
Bola1	-0.806201	2.95446	-8.17831	1.24163e-06	6.94131e-05	5.79143
Psmb4	-0.424455	6.94223	-8.44255	8.59754e-07	5.49341e-05	5.78723
Eif2s2	-0.372796	7.00574	-8.4448	8.57099e-07	5.49341e-05	5.78413
Lgals1	-0.941277	4.12631	-8.23316	1.14964e-06	6.51592e-05	5.78166
Ccdc92b	1.08211	2.22146	8.17635	1.24504e-06	6.94131e-05	5.77937
Zyg11a	-0.503384	5.59709	-8.35152	9.74903e-07	5.91881e-05	5.77923
Tmpo	-0.376278	7.46618	-8.46176	8.37351e-07	5.49341e-05	5.77545
Ubb	-0.379591	10.1338	-8.55703	7.35027e-07	5.01582e-05	5.77291
Garnl3	0.695737	4.10911	8.21013	1.18735e-06	6.70732e-05	5.75645
RP23-332O18.2	-1.83704	3.89117	-8.18146	1.23612e-06	6.93693e-05	5.7503
Aifm1	-0.365863	6.34912	-8.37983	9.3744e-07	5.77355e-05	5.74224
Wee1	-0.519315	5.97475	-8.34523	9.83451e-07	5.94953e-05	5.73689
Stk36	0.649628	3.37734	8.14752	1.29662e-06	7.20534e-05	5.72612
Cdkn3	-0.99404	2.45716	-8.12709	1.33456e-06	7.28852e-05	5.7229
Dnah7c	2.80088	0.86876	8.49731	7.97502e-07	5.32008e-05	5.71837
Psmd1	-0.39582	7.62054	-8.39008	9.24252e-07	5.71295e-05	5.66362
Ppp2r2c	-0.589942	5.21992	-8.24504	1.1307e-06	6.45144e-05	5.66072
Hist1h2af	-0.677542	5.70221	-8.28166	1.07433e-06	6.29928e-05	5.65714
Cdkn1b	0.825393	3.68421	8.11175	1.3638e-06	7.29356e-05	5.64832
Cdk4	-0.548304	6.46214	-8.31166	1.03037e-06	6.15484e-05	5.63933
Enox1	0.628971	3.94594	8.11757	1.35262e-06	7.29356e-05	5.62803
Hist1h3g	-0.819715	6.00979	-8.27019	1.09166e-06	6.29928e-05	5.62766
Mest	-0.900831	3.92563	-8.11263	1.36211e-06	7.29356e-05	5.62676
Optn	-0.852272	5.92469	-8.26934	1.09296e-06	6.29928e-05	5.61441
AC121576.1	1.11995	1.437	8.12824	1.33239e-06	7.28852e-05	5.61128
Cdca2	-0.522294	6.14276	-8.27028	1.09152e-06	6.29928e-05	5.6082
Calm1	-0.483731	7.00798	-8.32057	1.0177e-06	6.11336e-05	5.60817
Mesdc1	-0.708166	4.28265	-8.1242	1.34002e-06	7.28852e-05	5.60312
Syt17	0.790404	2.55628	8.02006	1.5534e-06	7.84055e-05	5.58185
Gpx3	-1.14829	1.66168	-8.05796	1.47186e-06	7.58607e-05	5.56458
Rims1	0.955324	3.64142	8.03515	1.52038e-06	7.74258e-05	5.55328
Ddx1	-0.357796	7.41754	-8.30128	1.04537e-06	6.19237e-05	5.55117
Fgd5	1.19977	6.39383	8.24236	1.13494e-06	6.45405e-05	5.5361
Hist1h2bf	-0.866703	4.60711	-8.09617	1.39422e-06	7.38676e-05	5.52958
Phgdh	-0.549855	6.70006	-8.2453	1.13029e-06	6.45144e-05	5.51737
Rad21	-0.324579	9.09779	-8.32624	1.00971e-06	6.08678e-05	5.4833
Tmem160	-1.29371	2.06111	-7.95998	1.69262e-06	8.26621e-05	5.46658
Kif22	-0.640069	5.30613	-8.06974	1.44743e-06	7.50888e-05	5.41033
Lmnb1	-0.508522	7.28249	-8.20007	1.20423e-06	6.78025e-05	5.40918
Hist2h4	-1.12608	4.00219	-7.96149	1.68897e-06	8.26621e-05	5.40181
Rpl6	-0.352286	9.124	-8.26995	1.09203e-06	6.29928e-05	5.40006
Rabgap1l	0.50903	5.58016	8.08921	1.40802e-06	7.39384e-05	5.39742
Cebpa	1.07931	2.7828	7.88908	1.87411e-06	8.81509e-05	5.39738
Pbx1	1.02914	3.47736	7.91329	1.80992e-06	8.62494e-05	5.3818
Ophn1	0.627328	4.02163	7.94161	1.73779e-06	8.37479e-05	5.37161
Ict1	-0.511035	4.60469	-7.99733	1.60459e-06	8.01504e-05	5.36906
Stoml2	-0.40013	5.97157	-8.10014	1.3864e-06	7.36824e-05	5.36904
Rnaseh2a	-0.394152	4.94096	-8.01314	1.56879e-06	7.89488e-05	5.36583
Rsph1	2.70053	2.03141	7.91541	1.80444e-06	8.6229e-05	5.3624
Kcna6	-1.36754	1.1792	-7.97555	1.65532e-06	8.18543e-05	5.35793
Casp3	-0.867977	2.32944	-7.85495	1.96873e-06	9.1697e-05	5.34914
AC126938.1	0.354326	6.63163	8.12595	1.33671e-06	7.28852e-05	5.34893
Myh7	1.52403	2.43278	7.85359	1.97261e-06	9.1697e-05	5.3482
Gpsm2	-0.475826	5.91108	-8.08049	1.42552e-06	7.44854e-05	5.34689
Fbxo6	-0.814973	2.74081	-7.8424	2.00479e-06	9.27278e-05	5.33073
Slfn9	-0.732834	2.40995	-7.83938	2.01355e-06	9.27278e-05	5.32889
Ildr2	0.753401	3.45858	7.8576	1.96121e-06	9.16664e-05	5.311
Snx5	-0.487138	6.71092	-8.10053	1.38562e-06	7.36824e-05	5.31069
Slc2a3	0.723023	4.18473	7.90155	1.84075e-06	8.69897e-05	5.29964
Snrpb	-0.450026	7.46033	-8.13106	1.32709e-06	7.28852e-05	5.29931
RP23-278I3.4	-0.448542	7.27545	-8.12117	1.34577e-06	7.28852e-05	5.29101
Fth1	-0.506667	7.58936	-8.12193	1.34431e-06	7.28852e-05	5.27556
Ppm1g	-0.38221	7.48705	-8.11278	1.36183e-06	7.29356e-05	5.265
Rpl27	-0.435467	7.98945	-8.12954	1.32995e-06	7.28852e-05	5.25457
H2afj	-0.687428	4.15374	-7.87783	1.90476e-06	8.92725e-05	5.25256
Mlph	1.58245	0.872618	7.95864	1.69588e-06	8.26621e-05	5.23149
Grk4	0.705664	3.66509	7.81582	2.08346e-06	9.47833e-05	5.22574
Rex2	-0.573103	5.6855	-7.97194	1.66389e-06	8.20403e-05	5.21135
Ppib	-0.468818	6.93835	-8.04621	1.49663e-06	7.6674e-05	5.20841
Snrpa	-0.418755	6.6846	-8.02449	1.54362e-06	7.81429e-05	5.19488
Usp26	-0.619581	7.20731	-8.04158	1.50653e-06	7.69502e-05	5.18918
Mcm3	-0.442723	8.16118	-8.08894	1.40856e-06	7.39384e-05	5.18651
Cherp	-0.297246	8.02768	-8.07941	1.42771e-06	7.44854e-05	5.18284
Kif18b	-0.692437	5.42117	-7.9298	1.76751e-06	8.47013e-05	5.17949
Atp5b	-0.37338	8.55313	-8.09137	1.40372e-06	7.39384e-05	5.16665
Ppa1	-0.470977	6.55996	-7.98466	1.6339e-06	8.12665e-05	5.14898
Hells	-0.473921	8.69892	-8.06943	1.44808e-06	7.50888e-05	5.12846
Mybl2	-0.380051	6.34516	-7.95543	1.70371e-06	8.2807e-05	5.12315
Epha8	0.45396	4.80911	7.84207	2.00573e-06	9.27278e-05	5.12143
Rnf26	-0.662157	5.70559	-7.9092	1.82061e-06	8.65172e-05	5.11949
Mycbp2	0.474931	8.46778	8.05483	1.4784e-06	7.59686e-05	5.11898
Cbx5	-0.486098	6.5459	-7.95886	1.69536e-06	8.26621e-05	5.11498
Fam102a	0.545272	5.4907	7.88851	1.87566e-06	8.81509e-05	5.11196
Stip1	-0.343322	7.31471	-7.99638	1.60677e-06	8.01504e-05	5.10906
Ptprn	-2.79748	0.643794	-8.02678	1.5386e-06	7.81206e-05	5.10404
Tenm2	0.902053	2.3081	7.6794	2.54204e-06	0.000109237	5.10369
Troap	-0.530089	3.82746	-7.73769	2.33425e-06	0.000103166	5.09291
Hist2h2aa1	-1.00071	9.1444	-8.06017	1.46724e-06	7.58518e-05	5.0857
Spag17	1.49991	1.02947	7.81981	2.07145e-06	9.47833e-05	5.07347
Nfkb1	0.672043	3.20962	7.65598	2.63096e-06	0.000111375	5.03824
Lpgat1	0.443949	5.18209	7.80677	2.111e-06	9.56007e-05	5.02867
RP23-460F17.1	-0.394822	8.73029	-8.00615	1.58451e-06	7.95053e-05	5.02829
Ryr3	0.881052	1.92472	7.63445	2.71564e-06	0.000112753	5.01785
Dnaic1	0.913336	1.73873	7.65145	2.64855e-06	0.000111745	5.01725
Bach2	0.644389	4.3435	7.73389	2.34721e-06	0.000103205	5.01248
RP23-108H23.2	-1.45644	1.08765	-7.72912	2.36364e-06	0.00010366	5.01138
Rbbp7	-0.487812	7.69333	-7.94416	1.73145e-06	8.36787e-05	5.00345
Prdx1	-0.736855	8.59879	-7.97854	1.64825e-06	8.17417e-05	4.9998
Dock9	0.341089	7.47024	7.93129	1.76372e-06	8.47013e-05	4.99845
Foxj2	0.485299	4.44703	7.71224	2.42265e-06	0.000105976	4.98004
Cct2	-0.287126	8.45004	-7.95051	1.71575e-06	8.31555e-05	4.96566
Tk1	-0.687341	4.01153	-7.66146	2.60987e-06	0.000111033	4.96479
Crebrf	0.677712	5.82992	7.81731	2.07896e-06	9.47833e-05	4.96462
Rpl15	-0.284053	7.65464	-7.90265	1.83785e-06	8.69897e-05	4.94648
Atp2b4	-0.504842	5.88382	-7.80462	2.1176e-06	9.56007e-05	4.94101
Wdr86	-1.0961	1.81907	-7.5773	2.95464e-06	0.000118603	4.9314
Naa38	-0.580312	5.69134	-7.78551	2.17718e-06	9.77438e-05	4.92539
Grik5	0.740132	3.48275	7.59432	2.8812e-06	0.000117592	4.92177
Gart	-0.295891	6.45136	-7.81898	2.07395e-06	9.47833e-05	4.91353
Cenpa	-0.502696	5.8793	-7.78229	2.18739e-06	9.79445e-05	4.91145
Klf3	1.07321	2.53295	7.54229	3.11195e-06	0.000122327	4.90683
Shmt1	-0.398225	6.34497	-7.80441	2.11823e-06	9.56007e-05	4.90253
Lrguk	0.895781	2.28117	7.53254	3.15731e-06	0.00012354	4.89324
Tes	-0.493374	3.7507	-7.59499	2.87835e-06	0.000117592	4.88689
Cfap65	2.01974	0.99616	7.70195	2.45944e-06	0.000106763	4.8653
Glcci1	0.582256	4.65022	7.64701	2.66589e-06	0.000111745	4.85019
Gabbr1	0.941997	2.62378	7.50133	3.3073e-06	0.000127365	4.84789
Klhl5	0.631744	3.13733	7.51066	3.26167e-06	0.000126464	4.82953
Tecr	-0.528819	5.54315	-7.70306	2.45544e-06	0.000106763	4.82842
Ska1	-0.670593	3.76009	-7.54903	3.08097e-06	0.00012167	4.82021
Atp5o	-0.372101	6.49208	-7.75715	2.26894e-06	0.000100802	4.81859
Cdh1	-0.662999	4.11596	-7.58448	2.92343e-06	0.000118347	4.81741
Fblim1	-0.801839	3.3145	-7.51451	3.24305e-06	0.000126028	4.81377
Chtf18	-0.368346	6.68025	-7.76497	2.24324e-06	9.99207e-05	4.81334
Trak1	0.865868	3.92091	7.52871	3.17533e-06	0.000123961	4.78865
Hnrnpa2b1	-0.416062	9.13335	-7.83836	2.01653e-06	9.27278e-05	4.76202
Aplp2	-0.401329	7.92781	-7.79414	2.15006e-06	9.67812e-05	4.75962
RP24-483G17.1	0.406214	5.139	7.61124	2.81011e-06	0.000115711	4.7303
Pcnx	0.460163	6.71625	7.70602	2.4448e-06	0.000106671	4.72325
Cfap57	1.23473	2.14005	7.4075	3.80538e-06	0.000139913	4.71095
Palm	0.803458	5.26224	7.60432	2.83896e-06	0.000116425	4.70874
Ncaph	-0.437977	6.03641	-7.6573	2.62588e-06	0.000111375	4.70259
Stard9	0.440676	6.47266	7.6815	2.53422e-06	0.000109176	4.70235
Gadd45gip1	-0.477005	5.0358	-7.5885	2.90611e-06	0.000118325	4.69906
Xist	1.5473	1.11633	7.50532	3.28771e-06	0.000127184	4.68615
Odc1	-0.482507	6.49184	-7.6716	2.57132e-06	0.000109667	4.68158
Ptbp1	-0.329983	7.84719	-7.73476	2.34423e-06	0.000103205	4.67933
Cs	-0.382423	6.88208	-7.68621	2.51678e-06	0.0001087	4.67913
Terc	-0.770499	3.96597	-7.45909	3.52243e-06	0.000133456	4.67112
Gmeb1	-0.441549	5.17589	-7.56895	2.99138e-06	0.000119641	4.66084
Slc1a2	1.23355	1.60112	7.40021	3.84729e-06	0.000140847	4.65392
Hmx1	1.48903	2.1548	7.36683	4.04534e-06	0.000146525	4.64301
Mfge8	-0.415743	6.52098	-7.64735	2.66457e-06	0.000111745	4.64113
Rpl26	-0.375241	9.36301	-7.76822	2.23264e-06	9.9709e-05	4.63877
Lrba	0.324615	7.28514	7.67475	2.55943e-06	0.000109463	4.62905
Pcnxl2	2.02091	0.596779	7.54609	3.09445e-06	0.00012192	4.62424
Eif3c	-0.23717	8.98716	-7.74154	2.32117e-06	0.000102855	4.6185
Hlx	-1.66163	0.676161	-7.52492	3.19325e-06	0.000124376	4.61597
Psmc3	-0.363076	7.96505	-7.69888	2.4705e-06	0.000106972	4.61232
RP23-381B19.2	-0.568426	2.78927	-7.35133	4.14094e-06	0.000146905	4.60856
Ddx39b	-0.278191	6.91645	-7.63834	2.70011e-06	0.000112626	4.59753
Btbd6	-0.464706	4.20727	-7.44199	3.61365e-06	0.000135539	4.59507
RP23-321M9.3	1.78005	0.831449	7.49912	3.31821e-06	0.000127497	4.59351
Vps8	0.355713	6.05622	7.58571	2.91812e-06	0.000118347	4.59317
Lrriq1	1.01582	1.55409	7.35701	4.10564e-06	0.000146635	4.592
Epha1	-0.699321	3.23062	-7.35927	4.09167e-06	0.000146635	4.58389
Zfp534	-0.555029	4.66823	-7.4689	3.47117e-06	0.000132184	4.57414
Fam81a	-0.96554	4.07125	-7.41633	3.75527e-06	0.000138943	4.56697
Calm2	-0.447759	8.16359	-7.67457	2.56012e-06	0.000109463	4.56254
Irf2bp1	-0.602004	4.35498	-7.41698	3.75162e-06	0.000138943	4.54558
Rnaseh2b	-0.464805	4.41103	-7.41501	3.76271e-06	0.000138943	4.54155
Ift57	0.640107	2.94385	7.30911	4.41375e-06	0.000154003	4.53746
Tmem62	-1.15908	0.779185	-7.45802	3.52806e-06	0.000133456	4.52566
Hmgb3	-0.435299	6.84969	-7.58355	2.92746e-06	0.000118347	4.52351
Arhgap23	0.718668	4.574	7.41242	3.77738e-06	0.000139184	4.52217
Msh6	-0.276412	7.95561	-7.63427	2.71637e-06	0.000112753	4.51717
Chaf1b	-0.630887	4.85733	-7.44238	3.61156e-06	0.000135539	4.51123
Tub	0.474898	5.36958	7.48508	3.38836e-06	0.000129789	4.50956
Elfn1	-0.990717	3.81693	-7.35323	4.12914e-06	0.000146905	4.50657
Mgat4a	-0.647893	4.9316	-7.43688	3.64142e-06	0.000136234	4.4949
Atad2	-0.373632	7.75686	-7.61012	2.81479e-06	0.000115711	4.49056
Pdx1	4.07408	-1.23191	9.22482	3.03209e-07	3.04279e-05	4.48863
Kif11	-0.684392	6.96161	-7.56137	3.02516e-06	0.000120582	4.48058
Mcm5	-0.516544	7.2746	-7.57756	2.95349e-06	0.000118603	4.48023
Zeb1	0.451188	5.17309	7.44176	3.61491e-06	0.000135539	4.47048
Gfpt2	-0.861713	5.04495	-7.42934	3.68276e-06	0.000137479	4.4642
Gm9	-0.798376	2.74211	-7.2427	4.88189e-06	0.000162165	4.45225
Acat2	-0.427679	4.44637	-7.35729	4.10391e-06	0.000146635	4.44262
Pphln1	-0.480223	7.15226	-7.55186	3.06809e-06	0.000121442	4.44225
Nfat5	0.434527	7.32527	7.55235	3.06587e-06	0.000121442	4.43817
Upf3b	-0.905609	4.65358	-7.38151	3.95695e-06	0.000143935	4.43665
AC127333.1	0.407088	5.53127	7.45059	3.56744e-06	0.000134647	4.43509
Dut	-0.448259	5.80706	-7.46437	3.49474e-06	0.000132785	4.43108
Synj2	0.952878	3.74418	7.29066	4.53882e-06	0.000156746	4.42991
Isyna1	-0.485339	7.61383	-7.55941	3.03393e-06	0.00012065	4.42575
Ubr4	0.389481	10.026	7.6451	2.67339e-06	0.000111784	4.42368
Kif2c	-0.60803	6.23209	-7.48265	3.40067e-06	0.000129789	4.42328
Ptma	-0.509875	9.53035	-7.62745	2.74377e-06	0.000113338	4.42118
Actr3	-0.339111	7.3703	-7.54012	3.12197e-06	0.000122438	4.41284
RP23-153F8.13	-0.682329	3.31297	-7.24657	4.85318e-06	0.000161951	4.41257
Myom1	0.947211	3.01154	7.22466	5.01788e-06	0.000163699	4.40755
Ube2c	-0.888274	4.89455	-7.37154	4.01677e-06	0.0001458	4.40513
Pnkp	-0.467616	4.49584	-7.33543	4.24151e-06	0.000149196	4.39767
Crmp1	-1.62155	0.759225	-7.33328	4.25533e-06	0.000149374	4.39365
Ccdc34	-0.346644	5.4239	-7.42022	3.73347e-06	0.000138825	4.39343
Stk39	0.518318	4.83426	7.35932	4.09139e-06	0.000146635	4.3834
Ranbp1	-0.471843	6.82678	-7.48411	3.39326e-06	0.000129789	4.36573
Apc2	0.85005	2.61121	7.17904	5.38001e-06	0.000173087	4.3636
Myo15	0.742769	2.79631	7.18672	5.31716e-06	0.000171476	4.36094
Sec61a1	-0.272181	7.35652	-7.50263	3.30092e-06	0.000127365	4.35801
Nr2e1	1.64656	1.07903	7.24595	4.85778e-06	0.000161951	4.35152
Dnmt1	-0.353837	9.06614	-7.56824	2.99453e-06	0.000119641	4.34683
Prr11	-0.835652	3.61155	-7.219	5.0614e-06	0.000164366	4.34563
Zdbf2	0.85638	5.19306	7.35026	4.14763e-06	0.000146905	4.3421
Ddx19b	-0.323778	6.23017	-7.41993	3.73509e-06	0.000138825	4.32269
Fam227a	0.798236	2.02964	7.13653	5.74239e-06	0.000178554	4.31492
Ccdc158	0.550567	3.85836	7.22472	5.01742e-06	0.000163699	4.31455
Edaradd	1.29628	0.947674	7.24766	4.84513e-06	0.000161951	4.31145
Oasl2	0.882533	4.15199	7.24559	4.86043e-06	0.000161951	4.3041
E2f8	-0.491029	4.61476	-7.27942	4.61691e-06	0.000157845	4.28827
Capg	-0.856433	4.10252	-7.23083	4.97091e-06	0.000163398	4.28515
Lrp10	-0.663428	5.70455	-7.35985	4.08813e-06	0.000146635	4.27893
Prmt6	-0.607758	3.36583	-7.15874	5.55001e-06	0.000176319	4.27127
Ccdc13	1.33702	2.05421	7.10223	6.0535e-06	0.000185077	4.26528
Coq7	-0.434058	5.72937	-7.34842	4.15916e-06	0.000146905	4.25238
Hk2	-0.615957	6.13907	-7.36531	4.05462e-06	0.00014655	4.24483
Trmt2a	-0.491504	4.53983	-7.24032	4.89958e-06	0.000162305	4.24329
Adgrv1	0.598143	5.73768	7.34084	4.20706e-06	0.00014829	4.24287
Adam22	0.572973	3.58434	7.14714	5.64957e-06	0.000177679	4.23747
Sepn1	1.21229	2.51589	7.08555	6.21125e-06	0.000187215	4.2343
Mroh4	7.41091	-1.85755	10.8971	4.0133e-08	1.33557e-05	4.23389
Tor4a	-0.89011	1.89905	-7.08196	6.24571e-06	0.000187591	4.23317
Phf19	-1.03551	2.53936	-7.0879	6.18873e-06	0.000187175	4.23186
Rec114	-0.514133	3.79647	-7.16593	5.48912e-06	0.00017471	4.23046
Cd109	1.04629	2.83987	7.10034	6.07119e-06	0.000185285	4.22599
Bard1	-0.364578	5.24312	-7.28226	4.597e-06	0.00015748	4.21519
Ddx20	-0.413828	6.18913	-7.34951	4.15237e-06	0.000146905	4.21434
Spag6	2.26965	-0.128684	7.58025	2.94176e-06	0.000118603	4.21332
Mtx2	-0.346431	5.15415	-7.26737	4.70214e-06	0.00015948	4.20672
RP23-3K10.3	1.00481	0.84683	7.14648	5.65532e-06	0.000177679	4.1985
Dtna	0.741233	4.8069	7.23438	4.94413e-06	0.000162832	4.19458
Hist1h4h	-0.755835	5.31794	-7.25115	4.81948e-06	0.000161951	4.187
Hs6st1	0.600667	3.44559	7.10314	6.04509e-06	0.000185077	4.18512
Stxbp2	-0.417776	4.06993	-7.13923	5.71868e-06	0.000178356	4.15481
Cdc5l	-0.323287	7.70694	-7.38399	3.94222e-06	0.000143706	4.14413
Zfp536	0.775285	2.16919	7.0218	6.85495e-06	0.000199566	4.1421
RP23-387F9.3	-0.398718	5.83832	-7.26352	4.72973e-06	0.000160097	4.10845
Adgb	1.72996	0.235537	7.21988	5.05456e-06	0.000164366	4.10327
Bhlhe40	-1.70981	2.10461	-6.98318	7.27896e-06	0.000206621	4.08636
Nucks1	-0.445961	6.1266	-7.26022	4.75347e-06	0.000160582	4.08348
Exosc10	-0.32505	6.8918	-7.30581	4.43583e-06	0.000154125	4.08072
Cpne1	-1.68544	3.72111	-7.04685	6.59398e-06	0.000194625	4.08057
RP24-201C14.10	-1.18321	2.96802	-7.00934	6.98886e-06	0.000200724	4.07452
Alyref	-0.470172	6.86389	-7.29412	4.5151e-06	0.000156243	4.07092
Hnrnpf	-0.393934	9.44226	-7.40177	3.83824e-06	0.000140818	4.06978
Adrbk2	0.906706	3.25721	7.0174	6.90199e-06	0.000200468	4.06568
RP23-342N8.2	1.50974	0.421044	7.21817	5.06778e-06	0.000164366	4.0635
Psme3	-0.305551	7.24788	-7.30832	4.41902e-06	0.000154003	4.06325
Mt2	-0.557712	6.1053	-7.24216	4.88585e-06	0.000162165	4.05831
Dgki	0.719962	3.97797	7.07581	6.3053e-06	0.000188057	4.05214
Rhoa	-0.28077	6.95023	-7.28741	4.56128e-06	0.000157083	4.05105
Ccna2	-0.765911	6.18057	-7.23766	4.91944e-06	0.000162647	4.04858
Rpap3	-0.461987	5.98283	-7.23633	4.92948e-06	0.000162663	4.04596
Psmc3ip	-0.626494	4.9392	-7.1498	5.62656e-06	0.000177679	4.03936
Nkap	-0.50509	4.24583	-7.08683	6.19895e-06	0.000187175	4.03537
Ivd	0.510026	3.21276	6.99432	7.1539e-06	0.000203749	4.03243
Oxct1	0.582855	4.9423	7.13613	5.74596e-06	0.000178554	4.03036
Prpf19	-0.25817	7.00557	-7.27201	4.66906e-06	0.000159308	4.0218
Atp5d	-0.339896	6.17579	-7.22459	5.01845e-06	0.000163699	4.02023
Bag1	-0.312037	7.50434	-7.29421	4.51451e-06	0.000156243	4.01207
Ubxn1	-0.308027	7.48673	-7.28658	4.567e-06	0.000157083	4.00549
Wdr7	0.358285	5.48406	7.16892	5.46405e-06	0.000174237	4.00483
Npm1	-0.443309	9.43823	-7.35654	4.10854e-06	0.000146635	4.00029
Cxxc1	-0.294886	7.22867	-7.26916	4.68937e-06	0.000159364	3.99738
Rab12	0.561092	3.1982	6.96287	7.5129e-06	0.000210806	3.98533
Zyx	-0.473886	5.76493	-7.17814	5.38742e-06	0.000173087	3.98341
Atoh8	0.805689	5.29131	7.14731	5.64811e-06	0.000177679	3.98155
Hivep1	0.4815	4.76166	7.09525	6.11902e-06	0.000186412	3.98056
Hist1h1c	-0.828089	9.07708	-7.32595	4.30275e-06	0.000150729	3.96682
Gltscr2	-0.375923	6.73655	-7.22474	5.01731e-06	0.000163699	3.96402
Lrp3	1.16216	0.76497	7.0167	6.90944e-06	0.000200468	3.96155
Bend4	0.335506	6.60202	7.20881	5.14072e-06	0.0001661	3.95552
RP23-235M8.1	5.70606	-2.99014	12.1263	1.05794e-08	8.20382e-06	3.94893
Sars2	-0.413602	4.95906	-7.09346	6.13593e-06	0.000186594	3.94643
Bicral	0.385176	5.10287	7.10277	6.04846e-06	0.000185077	3.94295
Dhrs3	-1.01042	1.54249	-6.89918	8.29934e-06	0.000227631	3.94162
Rps3	-0.270107	8.21839	-7.27	4.68336e-06	0.000159364	3.93586
Spc25	-0.508885	5.67314	-7.13966	5.71488e-06	0.000178356	3.93578
Rrp1b	-0.327853	6.2004	-7.17107	5.44608e-06	0.000174237	3.92992
U2af1l4	-0.452207	4.79702	-7.06524	6.40913e-06	0.000190487	3.92811
Aurkb	-0.490393	5.0826	-7.08399	6.22619e-06	0.000187335	3.92242
Tbc1d12	0.643938	2.76122	6.88842	8.44059e-06	0.000229294	3.91156
Hist1h2ab	-0.633449	4.80183	-7.05672	6.49406e-06	0.000192676	3.91006
Psd	0.972329	1.40226	6.89275	8.3835e-06	0.000228174	3.90688
Ap2a2	-0.255586	7.28553	-7.20991	5.13208e-06	0.0001661	3.90174
Fam92a	1.28352	1.89632	6.85748	8.86102e-06	0.000236202	3.89319
Faap20	0.821666	2.88143	6.87901	8.56626e-06	0.000230551	3.88273
Rasgef1b	0.694857	4.1374	6.97442	7.37887e-06	0.000208683	3.88219
Iqgap3	-0.49934	4.29056	-6.99022	7.19966e-06	0.00020471	3.8801
Psmb1	-0.346972	7.00233	-7.16951	5.45911e-06	0.000174237	3.86518
Dusp5	-0.652677	5.37531	-7.07837	6.28043e-06	0.000187972	3.86288
Mrpl48	-0.369486	4.64925	-7.00964	6.98561e-06	0.000200724	3.86056
Lyar	-0.356139	6.61254	-7.14903	5.63324e-06	0.000177679	3.85971
Ulk4	0.569435	3.5645	6.90244	8.25713e-06	0.000226907	3.85033
Hnrnpa1	-0.350123	9.06052	-7.24798	4.84276e-06	0.000161951	3.85025
RP23-354M9.1	-0.394614	5.56262	-7.0656	6.40553e-06	0.000190487	3.83413
Slc23a2	-0.433418	6.59582	-7.13436	5.7616e-06	0.000178714	3.83358
Sez6l	1.39516	0.637175	6.87788	8.58147e-06	0.000230551	3.80732
Ak6	-0.416579	6.27941	-7.0908	6.16115e-06	0.000186695	3.79673
Dlgap2	1.61975	0.676588	6.88659	8.46489e-06	0.000229588	3.79591
Zfp385b	0.467525	4.18661	6.92474	7.97374e-06	0.000221912	3.79469
Nusap1	-0.863029	4.72133	-6.95976	7.54945e-06	0.000211484	3.78779
Sf3b4	-0.408387	5.69055	-7.0474	6.58841e-06	0.000194625	3.7867
Zfyve28	-0.576269	5.24444	-7.01536	6.92385e-06	0.000200545	3.78551
Cox6a1	-0.361973	5.62962	-7.04054	6.6587e-06	0.000195521	3.78489
Cbx3	-0.394875	7.45676	-7.14403	5.67666e-06	0.000177695	3.78197
Dnmbp	0.792135	4.24393	6.91988	8.03468e-06	0.000222657	3.77949
Rpl24	-0.2643	7.21494	-7.12893	5.80983e-06	0.000179883	3.77292
Cfap46	1.6579	0.644639	6.91741	8.06578e-06	0.000222657	3.76704
Rfwd3	-0.261704	7.82142	-7.148	5.6422e-06	0.000177679	3.7664
Atad2b	0.446889	5.14074	6.97254	7.40053e-06	0.000208683	3.74168
Nsg1	-0.914131	1.44524	-6.76325	1.0283e-05	0.000257876	3.73497
Gins1	-0.785777	3.77718	-6.84584	9.02481e-06	0.000239073	3.73364
Ints7	-0.324199	6.76172	-7.07651	6.29852e-06	0.000188057	3.72978
Ifitm2	-1.96877	-0.344099	-7.30768	4.42329e-06	0.000154003	3.72182
Zbtb20	0.626648	5.81868	7.01162	6.96414e-06	0.00020069	3.72107
Ndufb7	-0.491329	5.52134	-6.9975	7.11863e-06	0.000203147	3.71969
Cdk1	-0.666385	4.72433	-6.91968	8.03714e-06	0.000222657	3.71877
Wbscr27	-0.595132	2.79037	-6.76002	1.03357e-05	0.000257876	3.71002
Irf9	0.567389	3.19669	6.78228	9.97753e-06	0.000252547	3.70416
Dgkd	0.354617	7.37716	7.09094	6.15977e-06	0.000186695	3.70328
Dazap1	-0.421943	5.87962	-7.00654	7.01935e-06	0.000200923	3.70117
Dnah14	0.663168	5.15851	6.95113	7.65168e-06	0.000213996	3.69793
Sept3	0.785697	2.53735	6.73651	1.07289e-05	0.000263359	3.69746
Ctnnd2	0.643296	4.51042	6.89256	8.38599e-06	0.000228174	3.69528
Nadk2	-0.398804	5.45748	-6.97264	7.39934e-06	0.000208683	3.68653
Golgb1	0.396044	8.88716	7.14435	5.67383e-06	0.000177695	3.68638
Htt	0.27346	7.47367	7.08003	6.2644e-06	0.000187822	3.68134
Cnbp	-0.431303	8.03042	-7.10429	6.03434e-06	0.000185077	3.68086
Fsip2	6.50413	-1.33197	9.53692	2.0371e-07	2.58047e-05	3.67942
Uqcrc1	-0.272788	6.74425	-7.04446	6.61843e-06	0.000194942	3.6789
Rpl36a-ps3	-0.431626	5.60205	-6.98035	7.31101e-06	0.000207186	3.67599
Tufm	-0.301763	6.68351	-7.03759	6.68926e-06	0.00019608	3.67103
Cnn3	-0.552535	6.64764	-7.03504	6.71576e-06	0.000196519	3.66579
Rsph3b	0.505446	4.55746	6.88458	8.49158e-06	0.000229947	3.66489
Kcnn1	1.08108	1.12474	6.7526	1.04581e-05	0.000260141	3.66471
Nup37	-0.392832	4.04266	-6.82599	9.31166e-06	0.000241791	3.65725
Slbp	-0.384813	7.15321	-7.05263	6.53534e-06	0.000193564	3.65672
Hsp90ab1	-0.313885	11.152	-7.17614	5.404e-06	0.000173294	3.65651
Hspbp1	-0.444805	4.07799	-6.82331	9.35107e-06	0.000242078	3.65485
Fthl17f	-0.903144	2.85205	-6.72886	1.08601e-05	0.000264799	3.65272
Shcbp1l	0.6809	4.59712	6.87875	8.56968e-06	0.000230551	3.65077
Zzef1	0.339859	6.46687	7.0075	7.00885e-06	0.000200923	3.64369
Rps3a1	-0.33119	8.91259	-7.10632	6.01551e-06	0.000185077	3.63579
Tubb4b	-0.729493	9.12179	-7.11232	5.96021e-06	0.000183872	3.63297
Lhx1	-1.1021	4.42944	-6.84806	8.99334e-06	0.000238982	3.62344
Dgkz	-0.409688	7.02619	-7.02487	6.82243e-06	0.000198958	3.62117
Larp7	-0.347275	6.80285	-7.01288	6.95056e-06	0.00020069	3.61885
Use1	-0.39979	5.03297	-6.89452	8.36026e-06	0.000228174	3.61865
Zfp189	0.965536	2.35644	6.67957	1.17477e-05	0.000279127	3.61325
Rpf2	-0.500377	4.20262	-6.81363	9.49503e-06	0.000244522	3.61071
Ecm1	-1.23318	2.20168	-6.67069	1.19155e-05	0.00028155	3.60989
Mtx1	-0.398989	5.03195	-6.883	8.51273e-06	0.000230042	3.60864
Ankrd24	0.712251	3.25467	6.71956	1.10221e-05	0.000266719	3.60238
Reep3	-0.520113	4.33358	-6.81387	9.49146e-06	0.000244522	3.58524
Pus1	-0.590694	4.36896	-6.81208	9.51835e-06	0.000244522	3.58279
Ssu72	-0.337041	5.31634	-6.89501	8.35383e-06	0.000228174	3.58268
Ankrd36	3.11238	-0.42889	7.39755	3.86265e-06	0.000141107	3.57743
Pbk	-0.627451	4.73762	-6.82808	9.28106e-06	0.000241663	3.57548
RP23-214L4.1	-0.294838	6.19379	-6.9427	7.75309e-06	0.000216477	3.56018
Gpx1	-0.58691	5.35412	-6.8823	8.52206e-06	0.000230042	3.55118
Cntfr	0.999886	3.10283	6.6787	1.17639e-05	0.000279127	3.55036
Rtkn2	-0.470658	4.66263	-6.81199	9.5197e-06	0.000244522	3.54922
Eml3	-0.638232	3.04077	-6.66313	1.20604e-05	0.000283793	3.54575
Myt1l	-0.443097	4.4401	-6.79628	9.75891e-06	0.000248488	3.54495
Mmp9	-0.946049	3.67315	-6.72433	1.09386e-05	0.000266095	3.53874
Morf4l2	-0.394296	6.34179	-6.93413	7.85761e-06	0.000219037	3.53001
Mcm2	-0.371669	8.19664	-7.0123	6.95683e-06	0.00020069	3.51875
Rbm28	-0.375482	6.00261	-6.90224	8.25964e-06	0.000226907	3.51629
Naa10	-0.513527	4.07195	-6.74491	1.05866e-05	0.000260994	3.51611
Smg1	0.362933	9.09228	7.04357	6.62756e-06	0.000194942	3.51591
Tmcc3	0.786733	3.95483	6.72095	1.09977e-05	0.000266507	3.51508
Lonrf2	0.750307	4.09496	6.74847	1.0527e-05	0.000260141	3.5138
Gsta4	-0.867291	5.18627	-6.83238	9.21833e-06	0.000240834	3.5094
Rps9	-0.41947	7.9597	-6.99729	7.12087e-06	0.000203147	3.50897
Plaur	-2.0508	0.244915	-6.79465	9.78414e-06	0.000248759	3.50837
Tubb5	-0.576136	8.80217	-7.02798	6.78958e-06	0.000198339	3.50715
Cfap69	1.59017	1.2283	6.64292	1.2457e-05	0.000287322	3.49644
Rpl28	-0.29608	7.55376	-6.96915	7.43965e-06	0.00020944	3.49481
Trib1	-0.617874	4.56798	-6.77702	1.0061e-05	0.000253907	3.48867
Nono	-0.425058	7.57681	-6.96653	7.47019e-06	0.000209953	3.48768
Wdr62	0.374275	5.83898	6.87041	8.6827e-06	0.000232538	3.48454
Pycard	-1.02874	1.7903	-6.58508	1.36694e-05	0.000305449	3.48212
Cdkn1c	-0.703757	5.30182	-6.83487	9.18214e-06	0.000240257	3.48164
Insr	0.763471	3.42184	6.66034	1.21144e-05	0.000284671	3.47678
Pqbp1	-0.355658	5.25512	-6.82729	9.29254e-06	0.000241663	3.47495
B4galt1	-0.677113	4.93362	-6.79009	9.85499e-06	0.000250188	3.46809
Pyurf	-0.498984	3.02683	-6.62492	1.28216e-05	0.000292428	3.46055
Large	0.423418	4.29987	6.71767	1.10552e-05	0.00026714	3.4522
Spata13	-0.334286	5.66343	-6.83845	9.13051e-06	0.000240257	3.44779
RP23-226O20.9	1.0563	0.855023	6.64262	1.2463e-05	0.000287322	3.44524
Suclg1	-0.378103	5.73747	-6.83874	9.1263e-06	0.000240257	3.44239
Psmb7	-0.345803	6.40338	-6.87615	8.60476e-06	0.000230813	3.43908
Gk5	0.565715	3.03327	6.60012	1.33426e-05	0.000301429	3.4386
Cfap74	0.569532	3.58262	6.64697	1.23764e-05	0.000287322	3.43479
Ell3	-0.653346	4.2281	-6.71305	1.11369e-05	0.000268356	3.43138
Cdk14	0.645723	3.6904	6.64574	1.24007e-05	0.000287322	3.42982
Kcnma1	1.91888	0.831339	6.65394	1.2239e-05	0.000286024	3.42888
Bub1b	-0.280442	7.44775	-6.91925	8.04255e-06	0.000222657	3.42231
Prelid1	-0.293585	6.40986	-6.86659	8.73502e-06	0.000233573	3.42199
Ly75	0.541544	4.4623	6.70891	1.12105e-05	0.000269748	3.40958
Faxc	0.868818	2.4319	6.54602	1.45582e-05	0.000320468	3.40607
Map9	0.505002	3.0135	6.58605	1.3648e-05	0.000305449	3.40208
Ror2	-1.14144	2.02158	-6.53087	1.4919e-05	0.000326725	3.39857
Rcbtb1	-0.372688	5.38859	-6.78338	9.9602e-06	0.000252483	3.39811
Elob	-0.335316	6.27716	-6.83519	9.17757e-06	0.000240257	3.37979
Myh6	0.554592	6.64595	6.85781	8.85635e-06	0.000236202	3.37348
Hist1h4b	-1.11916	4.00872	-6.63608	1.25942e-05	0.000289175	3.37322
Angel1	-0.303511	5.07656	-6.73745	1.07128e-05	0.000263343	3.36776
Naca	-0.429886	8.04655	-6.91216	8.13233e-06	0.000224132	3.36576
Bmi1	0.538817	6.03561	6.8072	9.59196e-06	0.000245704	3.3621
Trp53inp1	0.611916	5.60126	6.77335	1.01197e-05	0.000255011	3.36146
Rfx3	0.390796	4.58013	6.69215	1.15141e-05	0.000274664	3.35843
Acaca	0.242902	7.83483	6.89557	8.34648e-06	0.000228174	3.35617
Pgp	-0.574444	5.2822	-6.74811	1.05329e-05	0.000260141	3.35594
Dscc1	-0.633463	4.35035	-6.66559	1.2013e-05	0.000283069	3.3525
Celsr2	0.532872	4.90188	6.71661	1.1074e-05	0.000267216	3.34627
AC157774.6	-0.642071	3.80902	-6.61218	1.30865e-05	0.000297076	3.34568
Afap1l1	-0.697628	4.54038	-6.68694	1.16102e-05	0.000276247	3.34437
Hist1h1b	-0.846541	4.76766	-6.70688	1.12468e-05	0.000269992	3.34294
Nabp2	-0.499445	3.33637	-6.56934	1.40205e-05	0.000311041	3.3388
Zc3h12b	0.669583	2.57126	6.51434	1.53235e-05	0.000332171	3.33635
RP23-204N19.8	1.08612	1.76724	6.49337	1.58533e-05	0.00033892	3.33559
Cadps2	0.696605	4.27171	6.65094	1.2298e-05	0.000286618	3.33304
Usp3	-0.39839	6.72677	-6.82984	9.25533e-06	0.000241431	3.32895
Notch1	-0.606331	6.25566	-6.7968	9.75093e-06	0.000248488	3.31659
Map6	0.746332	2.80718	6.51824	1.5227e-05	0.000331342	3.31084
Rad23b	-0.30423	6.94505	-6.82387	9.34281e-06	0.000242078	3.30719
Cox4i1	-0.324264	7.51879	-6.84964	8.97101e-06	0.00023876	3.29754
Pa2g4	-0.353762	7.36364	-6.83746	9.14477e-06	0.000240257	3.29112
Pcdhgc4	-2.74902	0.861343	-6.58996	1.35625e-05	0.000304442	3.2905
Hnrnpd	-0.258416	7.41094	-6.83582	9.16839e-06	0.000240257	3.28803
Trrap	0.455966	9.63545	6.91783	8.06044e-06	0.000222657	3.28611
Ahcyl1	-0.290984	6.29583	-6.77709	1.00598e-05	0.000253907	3.28551
Ndufab1	-0.376273	6.02915	-6.76237	1.02973e-05	0.000257876	3.28143
Zmynd10	4.15728	-1.95951	9.5393	2.03102e-07	2.58047e-05	3.27552
Slc7a1	-0.334388	5.87811	-6.73889	1.06884e-05	0.000263123	3.27399
Slc41a1	-0.425177	4.85652	-6.67154	1.18993e-05	0.00028155	3.27186
Timm23	-0.343462	5.94602	-6.74788	1.05368e-05	0.000260141	3.26857
Txnl1	-0.305741	6.2192	-6.7615	1.03116e-05	0.000257876	3.26584
Ptges3	-0.336382	7.84192	-6.83836	9.13181e-06	0.000240257	3.26375
Tcp11l1	1.12718	1.86823	6.44107	1.72603e-05	0.000354103	3.2589
Puf60	-0.317314	8.10426	-6.84647	9.01595e-06	0.000239073	3.25301
RP23-214M22.3	0.958646	1.76197	6.42992	1.7577e-05	0.00035698	3.24113
Nol7	-0.31409	6.18945	-6.7485	1.05265e-05	0.000260141	3.23808
Gramd3	-0.651594	3.22899	-6.50133	1.56498e-05	0.000336367	3.23707
Tomm20	-0.304313	6.00896	-6.73071	1.08283e-05	0.000264658	3.23172
Miip	-0.450783	4.0327	-6.55959	1.42426e-05	0.000314913	3.22502
Adsl	-0.289409	6.14249	-6.73279	1.07925e-05	0.000264161	3.22373
Nudt21	-0.310407	6.76887	-6.7639	1.02724e-05	0.000257876	3.22215
Gtf2f1	-0.338231	7.49815	-6.79814	9.73025e-06	0.000248488	3.21709
Fam234b	-0.788938	3.4011	-6.49536	1.58021e-05	0.000338249	3.21545
Rufy1	0.535851	3.90278	6.54357	1.46159e-05	0.000321324	3.21409
Ptprg	-0.54381	6.09799	-6.72371	1.09495e-05	0.000266095	3.21007
Rhox4a	-1.29361	1.12722	-6.43745	1.73626e-05	0.000354103	3.20906
Shmt2	-0.514588	6.82941	-6.75981	1.03392e-05	0.000257876	3.20473
Syce3	0.598057	3.16117	6.4671	1.65444e-05	0.000346303	3.20377
Cenpe	-0.417698	8.25268	-6.81965	9.40528e-06	0.000243112	3.19952
Ppih	-0.401389	5.24629	-6.65621	1.21946e-05	0.000285769	3.19928
Scarna2	0.509218	5.15354	6.63831	1.25493e-05	0.000288532	3.19629
RP23-67C3.2	1.44088	0.743889	6.49245	1.58768e-05	0.000338998	3.19035
Fkbp3	-0.37166	6.38348	-6.7213	1.09916e-05	0.000266507	3.18616
Tgfbr3	0.954827	3.30891	6.4724	1.64025e-05	0.000345039	3.1848
Ldhc	2.05753	1.10204	6.46214	1.66783e-05	0.000346426	3.18311
Rexo2	-0.371378	5.50469	-6.66579	1.20091e-05	0.000283069	3.17757
Bub3	-0.376133	5.46917	-6.65943	1.21321e-05	0.000284694	3.17743
Cfap44	1.39514	0.748112	6.45714	1.68145e-05	0.000348125	3.17465
Aspm	-0.511221	7.10689	-6.74933	1.05126e-05	0.000260141	3.17416
Scube3	0.585783	5.17168	6.63097	1.26979e-05	0.000290773	3.17023
Rps11	-0.367772	8.40241	-6.8112	9.53149e-06	0.000244522	3.16957
Lmo2	1.41289	0.717415	6.43688	1.73787e-05	0.000354103	3.16649
RP24-333C3.5	4.5785	0.830058	6.5986	1.33753e-05	0.000301429	3.16556
Wdr19	0.871278	3.39988	6.4644	1.66172e-05	0.000346303	3.16287
Hmcn2	1.50428	0.850802	6.41134	1.81182e-05	0.000364072	3.14746
Acox3	0.584911	3.07154	6.41919	1.78874e-05	0.000361563	3.14571
Wdr33	-0.226263	6.99119	-6.72857	1.08651e-05	0.000264799	3.14406
Pkm	-0.563016	8.62477	-6.79869	9.72175e-06	0.000248488	3.14198
Fam64a	-0.648485	2.71359	-6.39065	1.87416e-05	0.000374394	3.1393
Ndufb10	-0.423696	5.6815	-6.64528	1.24098e-05	0.000287322	3.13416
Syt16	1.36254	0.726643	6.41998	1.78645e-05	0.000361528	3.13399
Grap2	0.805783	1.78393	6.35527	1.98606e-05	0.000386557	3.12375
Hccs	-0.405556	5.17261	-6.59447	1.34645e-05	0.00030304	3.11562
Gng5	-0.297863	5.95902	-6.65474	1.22233e-05	0.000286024	3.11533
Sez6	-0.969371	4.93297	-6.58138	1.37511e-05	0.000306258	3.1136
Hspg2	0.599541	7.03745	6.70381	1.1302e-05	0.000270424	3.10782
Erich3	1.32076	0.0777628	6.46839	1.65097e-05	0.000346303	3.09596
Ncoa2	0.332684	6.86894	6.69142	1.15275e-05	0.000274664	3.09283
Dbi	-0.409536	5.29418	-6.59136	1.35319e-05	0.000304156	3.09126
Ppp4r1l-ps	0.599318	3.75601	6.43815	1.73429e-05	0.000354103	3.08642
Anp32b	-0.329936	8.80881	-6.77039	1.01673e-05	0.000255831	3.08518
Fkbp9	0.383591	5.34248	6.58636	1.36414e-05	0.000305449	3.08405
Lsm6	-0.33884	5.84372	-6.62835	1.27513e-05	0.000291604	3.07564
Kcna1	-1.44365	1.38258	-6.32896	2.07382e-05	0.00039752	3.07051
Ndufa9	-0.293669	5.58089	-6.59862	1.33749e-05	0.000301429	3.06943
RP24-297H17.3	0.569548	3.75151	6.43828	1.73392e-05	0.000354103	3.06912
Eml5	0.360492	5.22187	6.57067	1.39904e-05	0.000310777	3.06258
AC110186.1	-0.534747	8.50494	-6.74817	1.05319e-05	0.000260141	3.0618
Agfg2	-0.437833	4.38444	-6.48393	1.6098e-05	0.000341422	3.06011
Mael	-0.336569	7.43815	-6.69504	1.14612e-05	0.00027385	3.05733
Cep290	0.411886	5.98515	6.6222	1.28777e-05	0.000293317	3.05565
Ctso	1.61676	1.08434	6.33784	2.04375e-05	0.000393971	3.05174
Ptpn21	0.654636	3.05734	6.36653	1.94972e-05	0.000383936	3.0407
Rcor1	0.596849	2.92863	6.34023	2.03572e-05	0.000393311	3.03742
Hnrnpul1	-0.285997	8.73479	-6.73338	1.07824e-05	0.000264161	3.02773
Rpl41	-0.494117	8.16914	-6.70658	1.12523e-05	0.000269992	3.02348
RP23-127B8.5	-0.341721	4.35041	-6.47152	1.6426e-05	0.000345108	3.02181
Kif20a	-0.592778	6.83474	-6.64389	1.24376e-05	0.000287322	3.0215
Pgam1	-0.309739	6.80066	-6.64273	1.24607e-05	0.000287322	3.02
Fdft1	-0.419017	6.75039	-6.64326	1.24501e-05	0.000287322	3.0198
Fbl	-0.360276	7.03377	-6.65242	1.22688e-05	0.000286328	3.01632
Atp7b	0.680228	2.99756	6.33858	2.04127e-05	0.000393937	3.00919
M6pr	-0.331065	6.2815	-6.61178	1.3095e-05	0.000297076	3.00846
Sap25	-0.910977	2.11892	-6.28712	2.22182e-05	0.000416095	3.00535
Phc3	0.724456	4.29586	6.43635	1.73938e-05	0.000354103	2.99599
Trim54	-1.3113	0.624831	-6.3088	2.14378e-05	0.000406817	2.99081
Cpxm1	-0.399106	4.97613	-6.50635	1.55231e-05	0.000335449	2.99054
Txnl4a	-0.342658	5.22206	-6.5262	1.50322e-05	0.00032794	2.98897
Map4	-0.247973	7.985	-6.6774	1.17884e-05	0.000279321	2.98628
Morc2b	5.95619	-2.89991	9.52427	2.06981e-07	2.58047e-05	2.9803
Mpp5	0.319243	6.06784	6.57953	1.37922e-05	0.000306772	2.97953
Mpnd	-1.05998	3.36789	-6.34826	2.00904e-05	0.000389479	2.97513
Anln	-0.446748	6.68797	-6.60309	1.32791e-05	0.000300454	2.96583
Bcl6	1.05173	3.18633	6.32214	2.09723e-05	0.000400657	2.96515
Idh2	-0.967892	2.36081	-6.26273	2.31323e-05	0.000428954	2.96098
Zfp600	-0.61022	5.07638	-6.49845	1.57231e-05	0.00033698	2.96003
Negr1	1.09801	1.05106	6.27039	2.28411e-05	0.000424477	2.9532
Gnl2	-0.286695	7.37663	-6.63281	1.26603e-05	0.000290302	2.95082
Ybx2	1.60415	2.9609	6.27303	2.27416e-05	0.000423742	2.95055
Gapvd1	0.475909	5.401	6.50479	1.55625e-05	0.000335646	2.93597
Hprt	-0.359684	4.91428	-6.466	1.65739e-05	0.000346303	2.93398
Rtel1	-0.314775	5.86489	-6.53444	1.48331e-05	0.000325261	2.92707
Cep128	0.530043	5.06265	6.47327	1.63791e-05	0.000344973	2.92654
H3f3b	-0.6009	7.99005	-6.63923	1.25308e-05	0.000288495	2.92384
Vstm2l	-2.22884	-0.752293	-6.70382	1.13018e-05	0.000270424	2.92282
Preb	-0.266012	5.72436	-6.52265	1.51186e-05	0.000329404	2.92215
Drp2	1.26932	1.06069	6.24974	2.36348e-05	0.000435431	2.92102
Abhd8	1.02429	1.25899	6.24855	2.36813e-05	0.000435818	2.91571
Mroh1	0.329979	6.00972	6.53787	1.47511e-05	0.000323878	2.91515
Rfc3	-0.399911	4.2654	-6.39731	1.85388e-05	0.000371011	2.91415
Eef1d	-0.39052	7.48937	-6.61399	1.30487e-05	0.000296813	2.90944
Ak8	0.873573	2.07865	6.21728	2.4942e-05	0.000453636	2.90068
Dlgap5	-0.399034	5.62638	-6.50113	1.56551e-05	0.000336367	2.90019
Rangap1	-0.435832	6.58497	-6.55925	1.42505e-05	0.000314913	2.89698
Cnot3	-0.27056	7.09798	-6.58465	1.36789e-05	0.000305449	2.89445
Timm8b	-0.356882	5.75292	-6.50593	1.55337e-05	0.000335449	2.88126
Psmd3	-0.401909	6.07653	-6.51616	1.52783e-05	0.000331612	2.87616
Cstf3	-0.33923	5.66458	-6.48637	1.60345e-05	0.000341082	2.87384
Hspa9	-0.261108	8.00646	-6.61067	1.31182e-05	0.000297207	2.87015
Fbxo9	-0.389521	6.00563	-6.51327	1.535e-05	0.000332323	2.869
Fam83d	-0.74661	4.24659	-6.35545	1.98549e-05	0.000386557	2.86798
Efcab6	0.827454	2.88593	6.25214	2.35413e-05	0.000434497	2.86713
Hmgn1	-0.370297	8.41561	-6.62548	1.28101e-05	0.000292428	2.86595
Stk25	0.355944	6.18919	6.51689	1.52603e-05	0.000331612	2.86272
Wipi1	0.757338	4.64932	6.39929	1.84788e-05	0.000370445	2.85976
Klf2	0.822653	2.00088	6.18887	2.61481e-05	0.000468087	2.85948
Phax	-0.331366	5.31993	-6.46427	1.66206e-05	0.000346303	2.85783
Gbp2	1.00837	1.2942	6.19554	2.58596e-05	0.000464842	2.8576
Lsm2	-0.314862	5.17301	-6.43768	1.7356e-05	0.000354103	2.85464
Dock3	0.295549	7.187	6.56484	1.41226e-05	0.000312897	2.85414
Rnf39	1.69204	-0.0264185	6.42356	1.77603e-05	0.00036007	2.85147
Snu13	-0.328681	6.06614	-6.49948	1.56968e-05	0.000336841	2.85031
Lsm8	-0.438754	5.29737	-6.44675	1.71014e-05	0.000353207	2.85015
Snrpe	-0.379614	5.91225	-6.49156	1.58999e-05	0.000339065	2.84528
Cops7a	-0.344929	6.62378	-6.52904	1.49632e-05	0.000327271	2.8418
Tbl1xr1	-0.306936	5.81382	-6.47926	1.62207e-05	0.000342906	2.83987
Ldhal6b	1.7225	0.00234052	6.45777	1.67973e-05	0.000348125	2.835
Csrp2	-0.691019	3.03009	-6.24116	2.39733e-05	0.000439767	2.83348
Cdc123	-0.466442	4.76348	-6.38352	1.89617e-05	0.000377024	2.83345
Pir	-1.03582	1.51063	-6.16987	2.69891e-05	0.00047664	2.83206
Msl3l2	-0.759522	3.69404	-6.29437	2.1954e-05	0.000413236	2.82567
Mdh1	-0.380675	4.90098	-6.39692	1.85505e-05	0.000371011	2.81652
Sohlh2	-0.459651	5.56973	-6.43752	1.73607e-05	0.000354103	2.80823
Ddx39	-0.401176	6.2329	-6.48168	1.61571e-05	0.000341985	2.80168
Pop7	-0.629519	2.81728	-6.19533	2.58687e-05	0.000464842	2.80131
Rarg	0.814518	4.41461	6.33453	2.05489e-05	0.000395671	2.80056
Art3	2.40837	-0.0445669	6.44393	1.71801e-05	0.000354103	2.79971
Nckap1l	-0.90009	1.99143	-6.1556	2.7639e-05	0.000481636	2.79941
Snap91	0.931513	1.18158	6.15091	2.78563e-05	0.000483827	2.79775
Mapre3	0.560244	3.33963	6.23127	2.43694e-05	0.000446075	2.79666
Babam1	-0.365306	5.59401	-6.43877	1.73253e-05	0.000354103	2.79631
Gas2l3	-0.491127	4.49863	-6.34394	2.02335e-05	0.000391364	2.79454
Gtpbp4	-0.369409	7.83243	-6.55828	1.42729e-05	0.000315	2.79397
Hmgb2	-0.637774	8.4892	-6.58245	1.37273e-05	0.000306128	2.79391
Rnps1	-0.259	7.71754	-6.54937	1.44795e-05	0.000319148	2.78963
P4ha2	0.733727	2.53157	6.16782	2.70811e-05	0.000477277	2.78583
Pax7	-0.948634	2.66302	-6.18725	2.62189e-05	0.000468371	2.78537
Lss	-0.315064	5.37962	-6.40975	1.81655e-05	0.000364592	2.78474
Anp32e	-0.499637	6.10065	-6.46164	1.66918e-05	0.000346426	2.78196
Irs4	0.623277	2.26097	6.15292	2.7763e-05	0.00048281	2.78106
Kifc1	-0.635475	5.48341	-6.41635	1.79708e-05	0.000361962	2.77367
Kansl1l	0.666384	2.9385	6.18273	2.64166e-05	0.000470916	2.77317
Slc7a8	1.06982	2.21879	6.13972	2.8382e-05	0.00048761	2.77192
Cacna1e	1.08917	1.4246	6.1276	2.89627e-05	0.000492136	2.76396
Lypd1	-2.2137	-0.432994	-6.46266	1.66641e-05	0.000346426	2.75715
Sumo2	-0.353559	7.15785	-6.50314	1.56041e-05	0.000336118	2.75274
Hist1h3a	-0.87596	5.87688	-6.42318	1.77713e-05	0.00036007	2.7508
Fev	-2.54353	-0.156052	-6.36536	1.95344e-05	0.000383936	2.74661
Zfyve26	0.379466	6.51866	6.46411	1.6625e-05	0.000346303	2.74095
AC114558.6	0.795827	2.2252	6.12519	2.908e-05	0.000493208	2.74062
Mrps22	-0.42172	6.03041	-6.43557	1.74158e-05	0.000354127	2.73668
Nid2	-0.513612	6.78539	-6.47772	1.62613e-05	0.000343338	2.73665
Nlgn2	0.638604	3.99407	6.25324	2.34983e-05	0.000434497	2.73503
Thada	0.258757	6.39303	6.45156	1.69681e-05	0.000350879	2.73465
Ccdc171	0.451963	5.3611	6.38062	1.9052e-05	0.000377939	2.73072
Pgap1	0.383338	5.35043	6.37745	1.91512e-05	0.000378596	2.72654
Cacna1b	0.485966	5.00949	6.35237	1.99553e-05	0.00038765	2.72294
Cotl1	-0.519309	4.51359	-6.30486	2.15777e-05	0.000409017	2.72206
Cdca3	-0.640603	5.54298	-6.38723	1.88469e-05	0.000375618	2.72092
Triml2	-0.934163	2.28325	-6.12511	2.90837e-05	0.000493208	2.71678
Calu	-0.236907	7.18555	-6.48346	1.61105e-05	0.000341422	2.71593
Tfap2a	0.673514	2.79236	6.14783	2.79999e-05	0.000484952	2.70626
H2-Q6	0.950967	0.890464	6.11505	2.95778e-05	0.000500096	2.70496
Fut8	0.396235	5.28745	6.35833	1.97611e-05	0.000386168	2.7027
Rusc1	-0.675996	2.06891	-6.0947	3.06037e-05	0.000510322	2.70219
Cdca7	-0.338036	7.51545	-6.48939	1.59561e-05	0.000339839	2.70021
Shprh	0.30098	6.13182	6.41638	1.79698e-05	0.000361962	2.69994
Tmem164	-0.561707	4.78424	-6.3152	2.12131e-05	0.000404285	2.69554
Zbed4	-0.242122	6.52352	-6.4394	1.73075e-05	0.000354103	2.69483
Mpv17l2	-0.631741	2.43728	-6.11315	2.96717e-05	0.000501187	2.69463
Cdc25b	-0.633873	3.5774	-6.19016	2.60922e-05	0.000467577	2.69212
Hmmr	-0.917273	5.30249	-6.34432	2.0221e-05	0.000391364	2.69161
Pcsk1n	2.83636	0.0139366	6.38239	1.8997e-05	0.000377287	2.68638
AC107815.5	-0.391792	6.74052	-6.4417	1.72427e-05	0.000354103	2.68456
Hist1h3d	-0.528518	5.86214	-6.38932	1.87826e-05	0.000374773	2.67452
Cdc45	-0.439811	5.65345	-6.36771	1.94595e-05	0.000383791	2.67279
Ccdc124	-0.545854	5.13372	-6.32657	2.08199e-05	0.00039864	2.66077
C1qbp	-0.347036	5.74813	-6.35994	1.97089e-05	0.000386168	2.6435
Hdac1	-0.291985	6.69513	-6.41434	1.80297e-05	0.000362721	2.64104
Cep55	-0.486933	5.41663	-6.32933	2.07256e-05	0.00039752	2.63795
Mrps18b	-0.41694	5.03132	-6.29394	2.19698e-05	0.000413236	2.63605
Celsr1	-0.477931	3.92427	-6.19887	2.57166e-05	0.000463768	2.63485
Chaf1a	-0.369812	6.88498	-6.41834	1.79125e-05	0.000361642	2.63396
Mrpl30	-0.36257	4.93688	-6.29232	2.20285e-05	0.000413883	2.63228
RP24-176G22.2	5.25232	-3.25091	9.46818	2.22169e-07	2.62722e-05	2.63004
Hjurp	-0.296428	8.021	-6.46451	1.66141e-05	0.000346303	2.62532
Psma5	-0.376281	6.07151	-6.3692	1.94121e-05	0.000383298	2.62284
Sfi1	0.662952	2.6223	6.06072	3.24017e-05	0.000531512	2.61527
Cad	-0.258308	8.40118	-6.47343	1.6375e-05	0.000344973	2.61435
RP23-314A12.1	0.471638	5.45698	6.31424	2.12467e-05	0.000404285	2.60997
Smc3	-0.262591	8.77797	-6.48547	1.60579e-05	0.000341156	2.60958
Scml4	2.00605	-0.724887	6.52754	1.49996e-05	0.000327648	2.6067
Cstf2t	-0.314321	6.39666	-6.37743	1.91517e-05	0.000378596	2.60411
Msn	-0.73425	6.02581	-6.36037	1.96952e-05	0.000386168	2.60051
Camk2g	0.463527	5.22219	6.29439	2.19536e-05	0.000413236	2.59863
Stox2	0.742133	4.02979	6.17513	2.67533e-05	0.000474628	2.58799
Ifi30	-0.387711	4.03886	-6.17046	2.69626e-05	0.00047664	2.58304
Bach1	-0.335847	5.05115	-6.27139	2.28031e-05	0.000424232	2.57831
H1f0	-0.687772	5.28469	-6.28105	2.24421e-05	0.000418887	2.5782
Bsdc1	0.364419	4.89133	6.25169	2.35586e-05	0.000434497	2.57649
Steap2	1.35294	1.29835	6.01526	3.49812e-05	0.000562678	2.57524
Ino80b	-0.374692	4.47014	-6.21158	2.51791e-05	0.000457339	2.57225
Tbc1d4	0.661476	3.23421	6.10077	3.02937e-05	0.000508171	2.5708
Dennd1b	0.558943	3.86232	6.14188	2.82795e-05	0.000486831	2.57013
Gnl3	-0.322703	6.59739	-6.36559	1.95271e-05	0.000383936	2.5662
Cdkn2a	-0.389283	4.53626	-6.20005	2.56664e-05	0.00046344	2.56495
Mboat7	0.369896	4.24234	6.17563	2.67312e-05	0.000474628	2.56215
Prkdc	0.47587	7.04726	6.37982	1.90771e-05	0.000377998	2.5539
Mroh2b	4.57557	-2.24963	8.27783	1.08009e-06	6.29928e-05	2.55218
Ndufa4	-0.411771	4.69632	-6.2111	2.51992e-05	0.000457339	2.54225
RP24-333C3.1	7.66491	-1.74183	7.6319	2.72583e-06	0.000112871	2.53825
Ralgapa1	0.343174	6.82194	6.35656	1.98187e-05	0.000386557	2.53508
Letm2	0.795277	2.29907	5.99994	3.58987e-05	0.000572901	2.53125
Rer1	-0.307628	4.85523	-6.22225	2.47367e-05	0.000450383	2.52839
Slc24a3	1.28456	0.432582	6.05034	3.29725e-05	0.000538803	2.52572
Sorcs3	0.944824	1.44497	5.97558	3.74094e-05	0.000590384	2.52163
Psma6	-0.439991	5.9624	-6.29717	2.18531e-05	0.000412861	2.52011
Abca13	1.54904	0.775692	6.01504	3.49942e-05	0.000562678	2.52008
Nek2	-0.307678	6.59111	-6.33344	2.05859e-05	0.000395936	2.51292
Uqcrq	-0.348043	5.69857	-6.2828	2.23773e-05	0.000418134	2.51188
Nans	-0.341401	6.26827	-6.31395	2.1257e-05	0.000404285	2.51124
Gm25395	0.477614	5.42915	6.25187	2.35516e-05	0.000434497	2.511
Zmynd11	0.639194	3.74536	6.09824	3.04228e-05	0.000508836	2.50345
Cd2bp2	-0.289822	6.17752	-6.30162	2.16931e-05	0.000410748	2.50002
Hist1h4a	-0.565807	7.36096	-6.35493	1.98717e-05	0.000386557	2.49904
Gpx4	-0.46472	5.79607	-6.26924	2.28845e-05	0.000424821	2.49146
Mb21d2	-0.433237	5.10157	-6.22459	2.46411e-05	0.000449289	2.49005
Zfp773	0.603765	5.37297	6.23768	2.41119e-05	0.000441836	2.48494
Chd7	0.564925	7.28816	6.35182	1.99733e-05	0.00038765	2.47785
Nsmce1	-0.336534	4.72423	-6.18733	2.62153e-05	0.000468371	2.47729
Frem1	1.12918	2.12182	5.96646	3.79925e-05	0.000597926	2.4741
Mdk	-1.17065	2.14558	-5.95744	3.85776e-05	0.000603504	2.47198
Xpo6	0.29438	6.59606	6.30964	2.14083e-05	0.000406711	2.4705
Fgd3	1.10559	1.27427	5.94213	3.95938e-05	0.000614623	2.46789
Samd10	-0.457617	3.13265	-6.02231	3.45676e-05	0.00055845	2.46701
Uty	0.429086	4.13788	6.10878	2.989e-05	0.000503379	2.46081
Ano10	0.406306	4.80254	6.17489	2.67639e-05	0.000474628	2.45664
Plekhh1	-0.348472	6.10251	-6.27275	2.27519e-05	0.000423742	2.45384
Gpd1l	-0.58454	3.62102	-6.06204	3.23298e-05	0.000530843	2.45354
Ankrd12	0.362721	7.2831	6.33167	2.06459e-05	0.000396642	2.45194
Paics	-0.295297	5.7721	-6.24419	2.38531e-05	0.000438506	2.44717
Snrpa1	-0.412885	5.53462	-6.22631	2.45708e-05	0.000448799	2.44465
Ppan	-0.316924	7.18831	-6.32502	2.0873e-05	0.000399208	2.44334
RP23-189N15.2	5.62429	-3.06719	8.6242	6.70908e-07	4.71016e-05	2.43572
Rars	-0.26628	6.77598	-6.29394	2.19696e-05	0.000413236	2.42592
Msh4	0.639728	3.06512	5.99023	3.64931e-05	0.000580217	2.41992
Hnrnpk	-0.357488	9.19107	-6.3845	1.89313e-05	0.000376858	2.4171
Ier3ip1	-0.503788	4.96863	-6.15992	2.74407e-05	0.000480373	2.41629
RP23-235M8.7	2.93778	0.253523	6.11199	2.97297e-05	0.00050167	2.41485
Akap7	0.714603	2.95877	5.97823	3.72419e-05	0.00058883	2.41345
Cyp51	-0.433798	4.76773	-6.13691	2.85153e-05	0.000487935	2.40511
Dusp26	1.38663	0.749938	5.92188	4.09804e-05	0.000626926	2.4007
Mrpl1	-0.398764	4.54465	-6.11791	2.94366e-05	0.000498202	2.40064
Rps15	-0.314609	7.63284	-6.31445	2.12392e-05	0.000404285	2.39743
Dnah7a	4.92675	-1.45968	7.28429	4.5829e-06	0.000157312	2.39677
Bambi	0.567826	3.43534	6.00593	3.55372e-05	0.000569798	2.39028
Rcc1	-0.337615	5.60469	-6.19431	2.59123e-05	0.000464842	2.38572
Stat1	0.504576	4.74628	6.12323	2.91753e-05	0.00049427	2.37771
RP24-93B5.3	-0.776451	2.70233	-5.93167	4.03039e-05	0.000623376	2.37374
RP24-185O19.6	-0.354267	4.45029	-6.08745	3.09785e-05	0.000513598	2.3707
Camkv	0.464904	4.58297	6.11006	2.98258e-05	0.000502795	2.37041
Ndufa11	-0.369455	5.7618	-6.19993	2.56712e-05	0.00046344	2.36404
Focad	0.340345	5.00133	6.1302	2.88372e-05	0.000491519	2.36222
Map3k8	0.622407	1.96449	5.88423	4.36962e-05	0.000652765	2.35825
Cdc20	-0.715061	5.75799	-6.18394	2.63637e-05	0.000470465	2.35027
Clec16a	0.367979	5.14181	6.14211	2.82686e-05	0.000486831	2.34959
Aebp1	-0.559006	6.06308	-6.20833	2.53154e-05	0.000458473	2.34444
Trp53bp1	0.197471	7.74752	6.28902	2.21487e-05	0.000415683	2.34369
Dnaaf1	0.643905	2.89179	5.91959	4.11406e-05	0.000627572	2.33975
Gria4	1.14972	0.144381	5.9506	3.90283e-05	0.000608057	2.33846
RP23-214M22.2	0.502051	2.86808	5.92815	4.05458e-05	0.000625508	2.33752
Mastl	-0.389349	5.15359	-6.13014	2.884e-05	0.000491519	2.33622
Dennd6b	0.753379	1.83801	5.86241	4.53554e-05	0.000669925	2.33342
RP23-175J8.3	0.341777	5.50655	6.15801	2.75282e-05	0.000480686	2.33151
Rab8b	0.578157	3.29798	5.95197	3.89379e-05	0.000608057	2.33093
Rpa1	-0.258137	6.67409	-6.22946	2.44429e-05	0.00044694	2.32789
Mlxipl	0.917587	3.33675	5.94751	3.92335e-05	0.00061014	2.32772
Tyms	-0.36931	4.82663	-6.10165	3.02495e-05	0.000507929	2.3276
Dapk3	-0.484938	5.39812	-6.15044	2.78782e-05	0.000483827	2.32694
Hnrnpc	-0.282064	7.26269	-6.2553	2.34183e-05	0.000433786	2.32693
Prmt1	-0.336911	6.31499	-6.20443	2.54802e-05	0.000460966	2.3208
Katnal1	0.388986	3.85238	6.00319	3.57023e-05	0.000570671	2.31671
Bdh1	-0.705558	2.94767	-5.91926	4.11637e-05	0.000627572	2.31445
Msl1	0.268411	6.69399	6.22436	2.46503e-05	0.000449289	2.31329
Cdc37	-0.45064	7.9513	-6.28467	2.23084e-05	0.000417304	2.31238
Gbp3	0.557827	3.59688	5.98883	3.65795e-05	0.000581048	2.31127
Mybbp1a	-0.297981	8.18339	-6.28709	2.22194e-05	0.000416095	2.31112
Ddr1	-0.684672	5.67557	-6.15963	2.74539e-05	0.000480373	2.30628
Rps18	-0.310461	8.60976	-6.30002	2.17505e-05	0.000411379	2.30353
Rpl35a	-0.341259	7.40536	-6.24343	2.38833e-05	0.000438588	2.29687
Ttf2	-0.269515	5.75622	-6.15565	2.76367e-05	0.000481636	2.29517
Psmb2	-0.357829	5.68416	-6.1492	2.7936e-05	0.000484338	2.29344
Etnk1	0.426024	6.00392	6.16784	2.70806e-05	0.000477277	2.29269
Orc6	-0.40442	5.09772	-6.10009	3.03284e-05	0.000508254	2.28815
Psma7	-0.305906	6.44782	-6.19795	2.5756e-05	0.000463989	2.28472
Prdx2	-0.536538	4.57588	-6.03906	3.36051e-05	0.000547045	2.28366
Phka1	0.623567	3.94353	5.98311	3.69354e-05	0.000585068	2.28288
Ckmt1	-1.42395	-0.18241	-5.95851	3.85083e-05	0.000603261	2.27888
Wdr6	-0.333754	5.6992	-6.13731	2.84963e-05	0.000487935	2.27242
AC160535.1	-0.367738	5.91283	-6.15852	2.75045e-05	0.000480686	2.27053
Havcr1	1.61104	-0.402727	6.03752	3.36922e-05	0.00054794	2.26652
Plekho1	0.594547	2.82309	5.88227	4.3842e-05	0.000653797	2.26315
Hdac11	0.631687	3.76607	5.95871	3.8495e-05	0.000603261	2.26087
Cirbp	-0.331221	6.35675	-6.17176	2.69038e-05	0.000476613	2.25654
Ankrd42	0.445365	3.6837	5.95098	3.90034e-05	0.000608057	2.25034
Mapk11	-0.788572	3.80845	-5.9685	3.78608e-05	0.000596404	2.25013
Ovol2	-0.675008	3.06781	-5.89809	4.26749e-05	0.000644278	2.24369
Fam234a	0.331839	4.96307	6.06789	3.20129e-05	0.000527936	2.23948
Hnrnpl	-0.297267	7.48528	-6.20865	2.5302e-05	0.000458473	2.22911
Smndc1	-0.3417	6.2	-6.14634	2.80695e-05	0.000485569	2.22847
March10	1.74482	0.166249	5.92121	4.10274e-05	0.000626926	2.22747
Ahsa1	-0.336175	6.20148	-6.1433	2.82126e-05	0.000486661	2.2245
Mrpl3	-0.28476	5.47426	-6.09357	3.06621e-05	0.000510322	2.22388
Afg3l1	-0.355607	5.06033	-6.05503	3.27131e-05	0.000536105	2.22334
Rbm8a	-0.31594	6.15822	-6.1327	2.87168e-05	0.00049088	2.22319
Rpl36	-0.475649	6.44538	-6.15328	2.77463e-05	0.00048281	2.22115
Mif	-0.283024	5.98734	-6.12819	2.89343e-05	0.000492136	2.22003
Zfp830	-0.299345	4.77493	-6.03971	3.35684e-05	0.000546969	2.21622
Ncapg	-0.423201	6.34394	-6.14412	2.81738e-05	0.000486483	2.21533
Spocd1	0.862848	3.67615	5.92488	4.07722e-05	0.000626926	2.20941
Relb	0.632078	3.35773	5.88763	4.34432e-05	0.000650123	2.20863
Lamtor1	-0.359119	5.64084	-6.09751	3.04597e-05	0.000508955	2.20712
Xrn1	0.324635	6.26093	6.12935	2.88783e-05	0.00049168	2.19793
RP23-377I11.1	0.520132	3.76784	5.93574	4.00258e-05	0.000619637	2.19408
RP23-37J21.3	-0.518637	4.07508	-5.95923	3.8461e-05	0.000603261	2.1933
Eif3i	-0.236706	7.27449	-6.17943	2.65624e-05	0.000472621	2.18991
Ppp2r5c	0.345596	5.74977	6.09659	3.05068e-05	0.000509242	2.18853
Atf4	-0.365072	5.62295	-6.07879	3.14321e-05	0.000520108	2.18233
Ramp2	-0.812517	2.57253	-5.80461	5.0078e-05	0.00071672	2.17582
Kif19a	0.960267	2.55707	5.8083	4.97618e-05	0.000713392	2.17559
Aco2	-0.278214	7.16279	-6.16388	2.72598e-05	0.000478449	2.17542
Prkar1a	-0.345479	7.87189	-6.19452	2.59036e-05	0.000464842	2.17141
Foxm1	-0.440631	6.75134	-6.13896	2.84179e-05	0.000487736	2.17038
Gli3	-0.250781	6.5499	-6.13211	2.8745e-05	0.00049088	2.1679
Irx2	0.939747	1.03859	5.76091	5.3989e-05	0.000758068	2.16778
Psmd7	-0.442432	7.19529	-6.16581	2.71724e-05	0.000478151	2.16626
Glud1	-0.410592	5.9401	-6.09248	3.0718e-05	0.000510322	2.16058
Sprtn	0.374508	5.21341	6.02983	3.41318e-05	0.000552981	2.15805
Tex19.2	-0.45609	4.49969	-5.97272	3.75911e-05	0.000592702	2.15648
Fam229b	0.917826	0.719067	5.77798	5.24247e-05	0.000744064	2.15544
Pml	0.556555	3.5477	5.8847	4.36612e-05	0.000652765	2.15445
Sox10	0.802355	3.01437	5.8225	4.85634e-05	0.000702111	2.15148
Srsf2	-0.444337	7.48059	-6.16313	2.72941e-05	0.000478558	2.14977
Ddx3x	-0.464341	7.62843	-6.17055	2.69581e-05	0.00047664	2.14861
RP23-250E1.1	5.49402	-3.13254	8.24728	1.12716e-06	6.45144e-05	2.14176
Acaa2	0.437146	3.86274	5.90277	4.23361e-05	0.000640928	2.14099
Upf2	0.302851	7.06984	6.13984	2.83761e-05	0.00048761	2.13823
Ss18l1	0.378385	4.35448	5.95148	3.89702e-05	0.000608057	2.13621
Ccdc22	-0.435217	4.50107	-5.9596	3.84367e-05	0.000603261	2.13299
Crebl2	0.416259	3.43737	5.85426	4.59919e-05	0.000676166	2.13035
RP23-37G19.2	0.989871	0.663167	5.76389	5.37126e-05	0.000754994	2.12841
Fhad1	0.956343	3.40466	5.85896	4.56236e-05	0.000672721	2.12696
Lrrc8b	0.592063	3.16091	5.82856	4.80617e-05	0.00069663	2.12255
Fry	0.499824	5.37436	6.03468	3.38539e-05	0.000549522	2.12254
Tbc1d9b	0.601472	4.31039	5.92753	4.05884e-05	0.000625508	2.11967
Cage1	0.855271	1.82358	5.73536	5.64223e-05	0.000781937	2.11862
Nsfl1c	-0.293218	6.12506	-6.07486	3.16406e-05	0.000522545	2.11752
Zfp687	-0.409981	6.02679	-6.0676	3.20289e-05	0.000527936	2.11677
Usp31	0.31675	5.96009	6.06336	3.22578e-05	0.000530683	2.11376
Ago2	-0.610254	4.36011	-5.92438	4.08067e-05	0.000626926	2.1137
Sfmbt2	-0.245942	6.43236	-6.09365	3.06579e-05	0.000510322	2.1135
Arl6ip1	-0.563808	5.34609	-6.0029	3.57195e-05	0.000570671	2.10869
Nxph4	-1.44212	2.14532	-5.75084	5.49351e-05	0.000766306	2.108
RP23-121M22.10	0.860254	1.59163	5.72353	5.75879e-05	0.000793423	2.1076
Ctdspl	0.548443	3.57026	5.85041	4.62958e-05	0.000676784	2.10474
Erbb3	-0.649861	5.39153	-6.02133	3.46249e-05	0.00055854	2.10368
Vps13c	0.271263	7.70408	6.14585	2.80924e-05	0.000485569	2.10095
Ddx21	-0.337553	8.1702	-6.16475	2.72202e-05	0.000478246	2.09966
Ivns1abp	-0.258572	7.54583	-6.13835	2.84468e-05	0.000487741	2.09843
Ikzf1	1.33974	1.04048	5.72088	5.78529e-05	0.000795943	2.09677
Bzw2	-0.620759	2.968	-5.7758	5.26214e-05	0.000744378	2.09033
Fkbp4	-0.427292	8.73661	-6.17931	2.65676e-05	0.000472621	2.08814
Hist1h2bc	-0.563951	5.68034	-6.02239	3.4563e-05	0.00055845	2.0863
Ubtf	-0.289358	8.35281	-6.16549	2.71868e-05	0.000478151	2.08528
Irf2bpl	0.437641	6.06847	6.05392	3.27743e-05	0.000536593	2.08304
Alkbh2	-0.461703	3.92409	-5.88362	4.37411e-05	0.000652863	2.08033
Agbl2	1.62733	0.507473	5.75463	5.45766e-05	0.000763177	2.08
Ccdc94	-0.538136	3.94114	-5.87408	4.44598e-05	0.000661854	2.07575
Tbcc	-0.375301	4.24629	-5.90331	4.22971e-05	0.000640928	2.07181
Dscaml1	0.896403	2.60969	5.75924	5.41447e-05	0.000759005	2.07092
Mrpl12	-0.402677	5.65411	-6.0211	3.46386e-05	0.00055854	2.06781
Setd7	0.728443	4.97137	5.95719	3.85945e-05	0.000603504	2.06441
Mrpl24	-0.2713	5.38625	-5.99724	3.60633e-05	0.000574991	2.06415
Ccdc3	-0.669096	2.07326	-5.71545	5.83987e-05	0.000799761	2.06319
Sephs1	-0.526596	4.01891	-5.86338	4.528e-05	0.00066963	2.05473
Pik3c2b	-0.432396	6.25598	-6.05049	3.29641e-05	0.000538803	2.0534
RP23-440F7.2	5.04041	-2.30477	7.25814	4.76853e-06	0.000160773	2.04785
Mpdz	0.331686	6.63428	6.06473	3.2184e-05	0.000529979	2.04615
Dnaja1	-0.355405	7.13925	-6.08249	3.12374e-05	0.000517388	2.03698
Cdkn1a	-1.07528	1.6562	-5.67772	6.23442e-05	0.000828988	2.03237
Hmox1	-0.420957	5.92894	-6.01697	3.48808e-05	0.000561914	2.02741
Dstn	-0.504842	7.70919	-6.10488	3.00859e-05	0.00050568	2.02401
Ndufs8	-0.356917	5.6531	-5.995	3.62002e-05	0.000576096	2.02303
Srcin1	0.639909	4.1714	5.86362	4.52619e-05	0.00066963	2.01404
Trf	-0.830224	3.99026	-5.8464	4.66147e-05	0.000679699	2.01177
Was	-0.949903	1.88817	-5.67574	6.25587e-05	0.00083086	2.00874
Wrn	0.405851	4.61612	5.89429	4.29521e-05	0.000646343	2.00641
Rad51	-0.344405	6.00029	-6.00607	3.55286e-05	0.000569798	2.00403
Mvp	-0.504662	3.15499	-5.74278	5.57038e-05	0.000774497	1.99876
Rrs1	-0.385305	5.90666	-5.99555	3.61661e-05	0.000576091	1.99597
Slc35d1	0.593793	2.44621	5.68985	6.1046e-05	0.000823277	1.99533
Sgsh	0.623309	2.41336	5.69638	6.03593e-05	0.000816196	1.99383
Coro1a	-0.694777	3.22193	-5.75833	5.42293e-05	0.000759566	1.99068
Stmn1	-0.331555	7.98411	-6.09242	3.0721e-05	0.000510322	1.98662
Dip2c	0.289831	4.85576	5.90961	4.18455e-05	0.000635129	1.98375
RP23-398O19.1	5.1663	-3.31984	8.40342	9.07378e-07	5.6591e-05	1.98209
Ptrh2	-0.495357	3.99332	-5.82307	4.85162e-05	0.000702024	1.98145
Nploc4	-0.23771	6.99102	-6.04337	3.33618e-05	0.000544644	1.97886
Nek11	1.00811	0.987345	5.64392	6.61151e-05	0.000861011	1.97713
Mrps16	-0.314054	4.8824	-5.90175	4.24095e-05	0.000640928	1.9765
Txndc9	-0.34041	5.15584	-5.92214	4.09622e-05	0.000626926	1.96836
Sgms2	0.525464	2.50341	5.67912	6.21924e-05	0.000828988	1.9679
Tcp11l2	0.675781	2.5171	5.67788	6.23268e-05	0.000828988	1.9669
Lsm4	-0.438788	6.06466	-5.98492	3.68225e-05	0.000584365	1.96204
Ercc5	0.761039	3.05533	5.71439	5.85054e-05	0.000799761	1.96136
Rab6b	0.415255	4.62216	5.87252	4.45786e-05	0.000662467	1.96065
Ywhaz	-0.318151	8.68047	-6.10589	3.00352e-05	0.000505327	1.96043
Ppfia1	-0.212893	8.51284	-6.09941	3.03628e-05	0.000508332	1.959
Bicd1	1.05843	2.09499	5.6479	6.56593e-05	0.000857038	1.95768
Cttnbp2	0.94972	0.941313	5.63438	6.72225e-05	0.000869459	1.95694
Filip1l	-0.65307	2.71822	-5.67826	6.22855e-05	0.000828988	1.95401
RP24-280B23.1	1.18126	0.561085	5.65143	6.52567e-05	0.000853088	1.951
Igf2r	0.249905	7.27886	6.04096	3.34975e-05	0.000546336	1.94805
Hist1h2bg	-0.503771	6.55394	-6.0028	3.57255e-05	0.000570671	1.94803
Sae1	-0.221803	7.22022	-6.03607	3.37749e-05	0.000548762	1.94592
Ythdf1	-0.226086	6.73912	-6.00597	3.5535e-05	0.000569798	1.94
Retreg1	0.591785	2.69943	5.67808	6.23046e-05	0.000828988	1.93991
Ddah1	0.569098	4.43375	5.84001	4.7128e-05	0.000685425	1.93983
Cenpt	-0.312894	5.02295	-5.8966	4.27833e-05	0.000644884	1.93913
Mgarp	1.10319	1.73969	5.62451	6.83875e-05	0.000881186	1.93852
Mpped1	0.673237	2.04964	5.63776	6.68275e-05	0.000865817	1.93709
Mrpl35	-0.396639	5.11178	-5.8965	4.27907e-05	0.000644884	1.93647
Tsga8	-1.52941	-0.985476	-5.93751	3.99058e-05	0.000618341	1.93334
Tm6sf1	0.827419	1.42272	5.6132	6.97499e-05	0.000892673	1.93124
Zkscan1	0.307174	5.68935	5.94096	3.96723e-05	0.000615282	1.92811
Tgfbi	0.870606	1.76425	5.61828	6.91349e-05	0.000887212	1.92553
RP23-356D13.9	0.516849	4.09883	5.79863	5.05952e-05	0.0007217	1.92493
Nphp1	0.426336	4.738	5.85396	4.60158e-05	0.000676166	1.91922
Lgals7	-0.799021	0.651149	-5.61647	6.9353e-05	0.000888928	1.91737
Slc5a1	1.34024	0.0920065	5.67936	6.21664e-05	0.000828988	1.91419
Plekhg1	0.573099	4.64942	5.8514	4.62176e-05	0.000676784	1.91417
Zcwpw2	0.61735	2.36311	5.64036	6.65266e-05	0.000864389	1.9115
Ascc3	0.310434	6.45127	5.97731	3.73004e-05	0.000589208	1.91108
Syt5	1.25622	0.587092	5.61981	6.8951e-05	0.000887107	1.9077
Ncaph2	-0.38402	6.58995	-5.98394	3.68835e-05	0.000584789	1.907
Tuba1c	-0.979112	2.75288	-5.66498	6.37378e-05	0.00083782	1.90623
Gne	0.5039	3.26077	5.71468	5.84758e-05	0.000799761	1.90467
Ttc6	1.72739	0.487395	5.64854	6.55854e-05	0.000856728	1.90174
Hydin	0.973984	3.36209	5.71442	5.85023e-05	0.000799761	1.90062
Ccnh	-0.320165	5.76326	-5.92799	4.05569e-05	0.000625508	1.89682
Emc8	-0.267387	6.23997	-5.96142	3.83183e-05	0.000602498	1.89403
Herc1	0.259099	9.3855	6.08832	3.09333e-05	0.000513349	1.89374
Hoxb8	-1.17157	2.01328	-5.61008	7.01312e-05	0.000896489	1.8924
Efnb3	0.468175	3.49571	5.71819	5.81219e-05	0.000798357	1.88944
Mrpl57	-0.46102	4.30387	-5.80895	4.97059e-05	0.000713392	1.88909
D930015E06Rik	-0.260269	6.77978	-5.98171	3.70232e-05	0.000585914	1.88846
Ano6	0.678892	3.01741	5.67504	6.26345e-05	0.00083086	1.8859
Nek4	0.311354	4.56103	5.81756	4.89772e-05	0.000706896	1.88325
Gmpr	-0.641538	3.59509	-5.73696	5.6267e-05	0.000781054	1.88038
Prkcb	-0.770811	2.56058	-5.63336	6.73413e-05	0.000870336	1.87766
Dmrt3	-0.670845	3.60874	-5.73632	5.63288e-05	0.000781276	1.87764
RP23-285N14.6	-0.531849	5.3758	-5.89114	4.31836e-05	0.000647699	1.8746
Olfml2b	0.619215	3.05129	5.66645	6.35753e-05	0.00083782	1.87422
Mvk	-0.605402	4.08593	-5.76579	5.35367e-05	0.000753797	1.86615
Map7d3	-0.885302	2.66297	-5.63879	6.6708e-05	0.00086569	1.86611
Zufsp	0.519303	3.23367	5.67484	6.26561e-05	0.00083086	1.8656
Pcsk4	1.12544	1.16029	5.57152	7.50194e-05	0.00094057	1.86124
Abtb2	-0.550883	4.13893	-5.76374	5.37258e-05	0.000754994	1.85607
Atpif1	-0.445741	7.59258	-6.00497	3.55948e-05	0.000570185	1.85241
RP23-240G3.2	1.72357	-0.467965	5.7514	5.48817e-05	0.000766189	1.8454
Rin2	1.00765	5.19659	5.85334	4.60644e-05	0.000676299	1.83829
Rpl8	-0.405561	9.66789	-6.06278	3.22896e-05	0.000530695	1.83714
Dock6	0.360737	6.65791	5.94833	3.91788e-05	0.000609846	1.83373
AC165086.3	0.312591	5.48462	5.87257	4.45744e-05	0.000662467	1.83144
Hdac9	0.661466	2.66695	5.61863	6.90925e-05	0.000887212	1.83052
Esd	-0.350026	6.142	-5.91088	4.1755e-05	0.00063432	1.83029
Slc25a39	-0.267312	5.96389	-5.90167	4.24155e-05	0.000640928	1.8296
Dennd4a	0.606137	4.85664	5.81146	4.94925e-05	0.000713126	1.82904
Mapk1ip1	0.488627	2.96742	5.64199	6.63376e-05	0.000862896	1.82734
Hist2h2ab	-0.705932	3.3135	-5.6807	6.20224e-05	0.000828988	1.82598
Ly6g6e	1.33973	-0.326985	5.70209	5.97644e-05	0.000809834	1.82217
Fgd1	-0.439368	6.30667	-5.92324	4.0886e-05	0.000626926	1.82185
Sap30l	-0.623729	3.83034	-5.7302	5.69275e-05	0.000785747	1.82143
Syn2	0.669235	3.80546	5.71655	5.82873e-05	0.000799342	1.81875
Aurka	-0.700567	4.87225	-5.80697	4.98751e-05	0.000714415	1.81785
Ropn1l	0.777823	3.29972	5.66662	6.35571e-05	0.00083782	1.81738
Terf1	-0.368837	5.86601	-5.8906	4.32237e-05	0.000647699	1.81325
Gps2	-0.386206	5.88603	-5.89033	4.32432e-05	0.000647699	1.81169
RP24-227O16.1	0.487789	8.89822	6.02395	3.44725e-05	0.00055797	1.81143
Psma1	-0.466707	4.98689	-5.80985	4.96294e-05	0.000713392	1.8066
Tlk1	0.267404	6.47993	5.92141	4.10136e-05	0.000626926	1.80584
Rbm20	1.08629	1.34413	5.53506	7.9969e-05	0.000984034	1.80133
Mrpl52	-0.570841	5.62814	-5.86327	4.52884e-05	0.00066963	1.80028
Fkbp2	-0.389685	4.69651	-5.78744	5.15782e-05	0.00073327	1.79711
Nbeal1	0.386004	6.68993	5.92332	4.08799e-05	0.000626926	1.79673
Cenpf	-0.410176	9.47083	-6.03273	3.39656e-05	0.000550811	1.7939
Isy1	-0.42021	6.07225	-5.89242	4.30895e-05	0.000647671	1.79178
Tbc1d30	0.828918	2.65929	5.58744	7.29587e-05	0.000922666	1.7852
Tubb6	-0.83957	2.43497	-5.57138	7.50372e-05	0.00094057	1.7849
Stk33	1.95774	0.115239	5.64503	6.59872e-05	0.000860001	1.78227
Ndufc2	-0.429009	5.05042	-5.80969	4.96428e-05	0.000713392	1.78194
Zic4	1.29663	0.0613903	5.56774	7.55171e-05	0.000943826	1.77265
Aldh3a2	0.329329	4.05794	5.70414	5.95524e-05	0.000808888	1.76807
Bcl11b	1.88644	0.642772	5.55101	7.77624e-05	0.000963418	1.76489
Gnb2	-0.337121	5.71277	-5.85083	4.6263e-05	0.000676784	1.76439
Akap6	0.942748	1.22569	5.51132	8.33735e-05	0.00100809	1.76401
Nsun5	-0.330848	4.90434	-5.77846	5.23809e-05	0.000744062	1.7626
Pigyl	0.831267	1.53921	5.51452	8.29071e-05	0.00100597	1.76021
RP24-408B13.1	0.250951	6.6893	5.90178	4.24075e-05	0.000640928	1.75407
Dcaf6	0.301321	6.52064	5.89414	4.29632e-05	0.000646343	1.75403
Raver1	-0.412053	6.04947	-5.85731	4.57527e-05	0.00067346	1.74796
Tubg2	-0.822146	4.65434	-5.76562	5.35522e-05	0.000753797	1.7471
Rps16	-0.307911	7.79011	-5.9469	3.92746e-05	0.000610223	1.74616
Agtpbp1	0.360946	5.90716	5.85206	4.61651e-05	0.000676784	1.74335
Ssbp1	-0.331464	5.93069	-5.85173	4.61911e-05	0.000676784	1.74022
Smarce1	-0.251734	7.2043	-5.91752	4.12854e-05	0.000628865	1.73914
Plaa	-0.341724	7.40605	-5.92091	4.10479e-05	0.000626926	1.73362
Gga2	-0.232387	5.97351	-5.84947	4.63704e-05	0.000676971	1.73274
Atcay	1.297	1.70636	5.50472	8.43475e-05	0.00101622	1.73156
Idh1	-0.360829	5.08051	-5.77641	5.25662e-05	0.000744215	1.72855
Dnajc19	-0.508239	4.20365	-5.69623	6.03744e-05	0.000816196	1.72417
Fstl3	1.10494	1.02481	5.4908	8.64404e-05	0.00103268	1.72252
Zranb2	-0.284627	6.03991	-5.84578	4.66643e-05	0.000679841	1.7195
RP23-413G8.2	0.704524	2.81521	5.57346	7.47641e-05	0.00094057	1.71908
[truncated: 15,819 more rows]

## Sheet: DGE_analysis_Adult_PND15_all
Genes	logFC	AveExpr	t	P.Value	adj.P.Val	B
[truncated: 20,832 more rows]

## Sheet: DGE_analysis_PND15_vs_PND8_down
Genes	logFC	AveExpr	t	P.Value	adj.P.Val	B
[truncated: 146 more rows]

[truncated: 7 more sheets: DGE_analysis_PND15_vs_PND8_up, DGE_analysis_Adult_PND15_down, DGE_analysis_Adult_PND15_up, DGE_specific_and_shared, Expression_germ_cell_markers, DGE_histones_pnd8_vs_pnd15, DGE_histones_adult_vs_pnd15]
