# Supplementary material for: Dynamics of transcriptional programs and chromatin accessibility in mouse spermatogonial cells from early postnatal to adult life
Source: bioRxiv preprint, doi:10.1101/2020.08.20.259374, version 3 (2024-05-29)
Supplement: Table S3 [file 259374_file09.xls]

## Sheet: all_atac_peaks
Peak-seqnames	Peak-start	Peak-end	Peak-width	Peak-strand	Peak-Name	Peak-Score	Peak-FoldChange	Peak-negLog10pvalue	Peak-negLog10qvalue	Peak-Summit	Peak-annotation	Peak-geneChr	Peak-geneStart	Peak-geneEnd	Peak-geneLength	Peak-geneStrand	Peak-geneId	Peak-transcriptId	Peak-distanceToTSS	Peak-ENSEMBL	Peak-SYMBOL	Peak-GENENAME	Peak-distance2nearestTSS_pa	Peak-nearestTSS.gene_name_pa	Peak-nearestTSS_pa	Peak-overlap_pa	Peak-class_pa	diffAccessibility-logFC	diffAccessibility-logCPM	diffAccessibility-F	diffAccessibility-PValue	diffAccessibility-qvalue
chr1	3117990	3118204	215	*	PND_Adult_NF_peak_1667	2519	38.3549	255.224	251.997	133	Distal Intergenic	1	3214482	3671498	457017	2	497097	ENSMUST00000070533.4	553294	ENSMUSG00000051951	Xkr4	X-linked Kx blood group related 4	15974	Gm26206	ENSMUST00000082908.1	intergenic	intergenic	0.0557465	1.17502	0.0823762	0.776425	0.889492
chr1	3119615	3119764	150	*	PND_Adult_NF_peak_1668	109	5.06147	13.003	10.937	30	Distal Intergenic	1	3214482	3671498	457017	2	497097	ENSMUST00000070533.4	551734	ENSMUSG00000051951	Xkr4	X-linked Kx blood group related 4	17599	Gm26206	ENSMUST00000082908.1	intergenic	intergenic	-0.945497	-0.895003	3.34881	0.0825916	0.26147
chr1	3147442	3147619	178	*	PND_Adult_NF_peak_1670	194	8.37832	21.6771	19.4682	93	Distal Intergenic	1	3214482	3671498	457017	2	497097	ENSMUST00000070533.4	523879	ENSMUSG00000051951	Xkr4	X-linked Kx blood group related 4	45426	Gm26206	ENSMUST00000082908.1	intergenic	intergenic	0.1702	-1.07956	0.192676	0.664246	0.824071
chr1	3184920	3185318	399	*	PND_Adult_NF_peak_1671	88	5.40537	10.872	8.85172	342	Distal Intergenic	1	3214482	3671498	457017	2	497097	ENSMUST00000070533.4	486180	ENSMUSG00000051951	Xkr4	X-linked Kx blood group related 4	-30314	Xkr4	ENSMUST00000159265.1	intergenic	intergenic	0.265714	0.424677	1.59227	0.217962	0.454269
chr1	3185397	3185586	190	*	PND_Adult_NF_peak_1672	134	6.75671	15.5317	13.4158	106	Distal Intergenic	1	3214482	3671498	457017	2	497097	ENSMUST00000070533.4	485912	ENSMUSG00000051951	Xkr4	X-linked Kx blood group related 4	-30046	Xkr4	ENSMUST00000159265.1	intergenic	intergenic	-0.0393298	-0.0580143	0.0301138	0.863547	0.935828
chr1	3185868	3185986	119	*	PND_Adult_NF_peak_1673	34	3.51349	5.2676	3.43108	83	Distal Intergenic	1	3214482	3671498	457017	2	497097	ENSMUST00000070533.4	485512	ENSMUSG00000051951	Xkr4	X-linked Kx blood group related 4	-29646	Xkr4	ENSMUST00000159265.1	intergenic	intergenic	0.304775	-0.573421	1.31103	0.262414	0.503495
chr1	3361013	3361253	241	*	PND_Adult_NF_peak_1676	370	11.9921	39.4504	37.0638	62	Intron (ENSMUST00000070533.4/497097, intron 2 of 2)	1	3214482	3671498	457017	2	497097	ENSMUST00000070533.4	310245	ENSMUSG00000051951	Xkr4	X-linked Kx blood group related 4	-7296	RP23-317L18.4	ENSMUST00000195335.1	intronic	intronic	-0.289507	0.446963	1.71563	0.201465	0.434662
chr1	3361364	3361551	188	*	PND_Adult_NF_peak_1677	654	17.5048	67.9748	65.4065	73	Intron (ENSMUST00000070533.4/497097, intron 2 of 2)	1	3214482	3671498	457017	2	497097	ENSMUST00000070533.4	309947	ENSMUSG00000051951	Xkr4	X-linked Kx blood group related 4	-6998	RP23-317L18.4	ENSMUST00000195335.1	intronic	intronic	-0.0894159	0.640604	0.153456	0.698517	0.844761
chr1	3445634	3445735	102	*	PND_Adult_NF_peak_1678	88	5.40537	10.872	8.85172	46	Intron (ENSMUST00000070533.4/497097, intron 1 of 2)	1	3214482	3671498	457017	2	497097	ENSMUST00000070533.4	225763	ENSMUSG00000051951	Xkr4	X-linked Kx blood group related 4	-20852	RP23-115I1.1	ENSMUST00000161581.1	intronic	intronic	0.336404	-1.09747	0.968207	0.334	0.574785
chr1	3445915	3446174	260	*	PND_Adult_NF_peak_1679	34	3.51349	5.2676	3.43108	29	Intron (ENSMUST00000070533.4/497097, intron 1 of 2)	1	3214482	3671498	457017	2	497097	ENSMUST00000070533.4	225324	ENSMUSG00000051951	Xkr4	X-linked Kx blood group related 4	-20413	RP23-115I1.1	ENSMUST00000161581.1	intronic	intronic	-0.222731	-0.594022	0.281321	0.601676	0.783889
chr1	3449540	3449697	158	*	PND_Adult_NF_peak_1681	416	13.5134	44.0637	41.6413	42	Intron (ENSMUST00000070533.4/497097, intron 1 of 2)	1	3214482	3671498	457017	2	497097	ENSMUST00000070533.4	221801	ENSMUSG00000051951	Xkr4	X-linked Kx blood group related 4	-16890	RP23-115I1.1	ENSMUST00000161581.1	intronic	intronic	0.863523	-0.798457	9.03349	0.00572431	0.0540275
chr1	3502382	3502600	219	*	PND_Adult_NF_peak_1683	115	6.21617	13.6121	11.532	150	Intron (ENSMUST00000161581.1/ENSMUST00000161581.1, intron 1 of 1)	1	3214482	3671498	457017	2	497097	ENSMUST00000070533.4	168898	ENSMUSG00000051951	Xkr4	X-linked Kx blood group related 4	-11907	RP23-115I1.5	ENSMUST00000192973.1	intronic	intronic	-0.261496	-1.49221	0.395562	0.534758	0.73764
chr1	3531636	3531864	229	*	PND_Adult_NF_peak_1685	115	5.3204	13.6355	11.555	116	Exon (ENSMUST00000192183.1/ENSMUST00000192183.1, exon 1 of 1)	1	3214482	3671498	457017	2	497097	ENSMUST00000070533.4	139634	ENSMUSG00000051951	Xkr4	X-linked Kx blood group related 4	0	RP23-115I1.2	ENSMUST00000192183.1	exonic	TSS	0.295288	0.167436	1.59781	0.217187	0.453327
chr1	3531965	3532097	133	*	PND_Adult_NF_peak_1686	49	3.61284	6.87531	4.97406	87	Exon (ENSMUST00000192183.1/ENSMUST00000192183.1, exon 1 of 1)	1	3214482	3671498	457017	2	497097	ENSMUST00000070533.4	139401	ENSMUSG00000051951	Xkr4	X-linked Kx blood group related 4	170	RP23-115I1.2	ENSMUST00000192183.1	exonic	proximal <=1000bp	0.255055	-0.223269	1.13893	0.295476	0.537639
chr1	3532303	3532471	169	*	PND_Adult_NF_peak_1687	70	4.18924	8.98129	7.01633	84	Exon (ENSMUST00000192183.1/ENSMUST00000192183.1, exon 1 of 1)	1	3214482	3671498	457017	2	497097	ENSMUST00000070533.4	139027	ENSMUSG00000051951	Xkr4	X-linked Kx blood group related 4	508	RP23-115I1.2	ENSMUST00000192183.1	exonic	proximal <=1000bp	-0.109234	0.17411	0.237803	0.629796	0.802524
chr1	3532598	3532771	174	*	PND_Adult_NF_peak_1688	70	4.18328	8.96757	7.00289	70	Exon (ENSMUST00000192183.1/ENSMUST00000192183.1, exon 1 of 1)	1	3214482	3671498	457017	2	497097	ENSMUST00000070533.4	138727	ENSMUSG00000051951	Xkr4	X-linked Kx blood group related 4	803	RP23-115I1.2	ENSMUST00000192183.1	exonic	proximal <=1000bp	-0.133518	0.205719	0.454506	0.506024	0.716182
chr1	3532952	3533109	158	*	PND_Adult_NF_peak_1689	62	3.97055	8.19854	6.25785	51	Intron (ENSMUST00000070533.4/497097, intron 1 of 2)	1	3214482	3671498	457017	2	497097	ENSMUST00000070533.4	138389	ENSMUSG00000051951	Xkr4	X-linked Kx blood group related 4	1157	RP23-115I1.2	ENSMUST00000192183.1	intronic	intronic	-0.183976	0.120514	0.8441	0.366489	0.604502
chr1	3533192	3533297	106	*	PND_Adult_NF_peak_1690	20	2.66209	3.83854	2.09988	66	Intron (ENSMUST00000070533.4/497097, intron 1 of 2)	1	3214482	3671498	457017	2	497097	ENSMUST00000070533.4	138201	ENSMUSG00000051951	Xkr4	X-linked Kx blood group related 4	1397	RP23-115I1.2	ENSMUST00000192183.1	intronic	intronic	0.122107	-0.132681	0.268676	0.60851	0.788424
chr1	3533469	3533667	199	*	PND_Adult_NF_peak_1691	176	6.66945	19.8189	17.6362	87	Intron (ENSMUST00000070533.4/497097, intron 1 of 2)	1	3214482	3671498	457017	2	497097	ENSMUST00000070533.4	137831	ENSMUSG00000051951	Xkr4	X-linked Kx blood group related 4	1674	RP23-115I1.2	ENSMUST00000192183.1	intronic	intronic	-0.114269	0.199649	0.299478	0.588776	0.775438
chr1	3556781	3557050	270	*	PND_Adult_NF_peak_1695	854	21.5622	88.075	85.4092	142	Intron (ENSMUST00000070533.4/497097, intron 1 of 2)	1	3214482	3671498	457017	2	497097	ENSMUST00000070533.4	114448	ENSMUSG00000051951	Xkr4	X-linked Kx blood group related 4	24986	RP23-115I1.2	ENSMUST00000192183.1	intronic	intronic	0.198324	0.0538255	0.677182	0.417881	0.648312
chr1	3566891	3567149	259	*	PND_Adult_NF_peak_1696	441	14.054	46.6254	44.1848	161	Intron (ENSMUST00000070533.4/497097, intron 1 of 2)	1	3214482	3671498	457017	2	497097	ENSMUST00000070533.4	104349	ENSMUSG00000051951	Xkr4	X-linked Kx blood group related 4	-28754	RP23-115I1.3	ENSMUST00000195166.1	intronic	intronic	0.419138	0.0551373	2.54481	0.12276	0.328522
chr1	3567310	3567468	159	*	PND_Adult_NF_peak_1697	260	9.99993	28.3188	26.0322	70	Intron (ENSMUST00000070533.4/497097, intron 1 of 2)	1	3214482	3671498	457017	2	497097	ENSMUST00000070533.4	104030	ENSMUSG00000051951	Xkr4	X-linked Kx blood group related 4	-28435	RP23-115I1.3	ENSMUST00000195166.1	intronic	intronic	0.137125	-0.407495	0.251907	0.619868	0.795798
chr1	3583973	3584414	442	*	PND_Adult_NF_peak_1698	106	5.9459	12.6794	10.6183	406	Intron (ENSMUST00000070533.4/497097, intron 1 of 2)	1	3214482	3671498	457017	2	497097	ENSMUST00000070533.4	87084	ENSMUSG00000051951	Xkr4	X-linked Kx blood group related 4	-11489	RP23-115I1.3	ENSMUST00000195166.1	intronic	intronic	0.35631	0.619525	3.76791	0.0629173	0.22308
chr1	3670707	3671071	365	*	PND_Adult_NF_peak_1700	2456	19.649	248.811	245.602	145	Promoter	1	3214482	3671498	457017	2	497097	ENSMUST00000070533.4	427	ENSMUSG00000051951	Xkr4	X-linked Kx blood group related 4	-427	Xkr4	ENSMUST00000070533.4	exonic	proximal <=1000bp	0.0894539	2.53846	0.573927	0.455367	0.678335
chr1	3671422	3672645	1224	*	PND_Adult_NF_peak_1701	1270	12.6919	129.88	127.048	340	Promoter	1	3214482	3671498	457017	2	497097	ENSMUST00000070533.4	0	ENSMUSG00000051951	Xkr4	X-linked Kx blood group related 4	0	Xkr4	ENSMUST00000070533.4	exonic	TSS	0.146907	3.33963	1.90492	0.179027	0.406564
chr1	3691303	3691631	329	*	PND_Adult_NF_peak_1702	184	8.10805	20.6158	18.4212	186	Distal Intergenic	1	3214482	3671498	457017	2	497097	ENSMUST00000070533.4	-19805	ENSMUSG00000051951	Xkr4	X-linked Kx blood group related 4	11148	RP23-122M2.2	ENSMUST00000193244.1	intergenic	intergenic	0.311126	0.0908749	2.15424	0.153911	0.373422
chr1	3754409	3754662	254	*	PND_Adult_NF_peak_1706	106	5.9459	12.6794	10.6183	145	Distal Intergenic	1	3214482	3671498	457017	2	497097	ENSMUST00000070533.4	-82911	ENSMUSG00000051951	Xkr4	X-linked Kx blood group related 4	2399	RP23-122M2.1	ENSMUST00000194454.1	intergenic	intergenic	0.40277	-0.737392	1.74509	0.197755	0.430138
chr1	3878101	3878368	268	*	PND_Adult_NF_peak_1709	41	3.78376	5.98892	4.12049	200	Distal Intergenic	1	3214482	3671498	457017	2	497097	ENSMUST00000070533.4	-206603	ENSMUSG00000051951	Xkr4	X-linked Kx blood group related 4	94168	Gm27396	ENSMUST00000157708.2	intergenic	intergenic	-0.0313366	-1.00324	0.00926436	0.924043	0.965511
chr1	3916258	3916384	127	*	PND_Adult_NF_peak_1711	153	7.29725	17.5188	15.3698	56	Intron (ENSMUST00000194643.1/ENSMUST00000194643.1, intron 2 of 2)	1	3214482	3671498	457017	2	497097	ENSMUST00000070533.4	-244760	ENSMUSG00000051951	Xkr4	X-linked Kx blood group related 4	-69600	RP23-333I7.1	ENSMUST00000192427.1	intronic	intronic	0.414927	-1.18733	0.9551	0.337309	0.577921
chr1	3934260	3934505	246	*	PND_Adult_NF_peak_1712	4627	50.0147	466.583	462.764	110	Intron (ENSMUST00000194643.1/ENSMUST00000194643.1, intron 2 of 2)	1	3214482	3671498	457017	2	497097	ENSMUST00000070533.4	-262762	ENSMUSG00000051951	Xkr4	X-linked Kx blood group related 4	-51479	RP23-333I7.1	ENSMUST00000192427.1	intronic	intronic	-0.0311009	2.3214	0.0538511	0.81827	0.912461
chr1	3934622	3934821	200	*	PND_Adult_NF_peak_1713	63	3.58597	8.26983	6.32756	39	Intron (ENSMUST00000194643.1/ENSMUST00000194643.1, intron 2 of 2)	1	3214482	3671498	457017	2	497097	ENSMUST00000070533.4	-263124	ENSMUSG00000051951	Xkr4	X-linked Kx blood group related 4	-51163	RP23-333I7.1	ENSMUST00000192427.1	intronic	intronic	-0.217645	1.02227	1.69626	0.20395	0.437755
chr1	4142060	4142240	181	*	PND_Adult_NF_peak_1720	216	8.91886	23.8403	21.6041	107	Intron (ENSMUST00000208660.1/19888, intron 22 of 29)	1	4344146	4360314	16169	2	19888	ENSMUST00000027032.5	218074	ENSMUSG00000025900	Rp1	retinitis pigmentosa 1 (human)	-118279	RP23-177A20.1	ENSMUST00000195384.1	intronic	intronic	0.227176	-0.98042	0.417649	0.523654	0.729433
chr1	4142650	4142827	178	*	PND_Adult_NF_peak_1721	391	12.9729	41.5363	39.1328	64	Exon (ENSMUST00000208660.1/19888, exon 22 of 30)	1	4344146	4360314	16169	2	19888	ENSMUST00000027032.5	217487	ENSMUSG00000025900	Rp1	retinitis pigmentosa 1 (human)	-117692	RP23-177A20.1	ENSMUST00000195384.1	exonic	exonic	0.105568	-0.333385	0.175633	0.678521	0.833056
chr1	4143045	4143163	119	*	PND_Adult_NF_peak_1722	115	6.21617	13.6121	11.532	61	Intron (ENSMUST00000208660.1/19888, intron 21 of 29)	1	4344146	4360314	16169	2	19888	ENSMUST00000027032.5	217151	ENSMUSG00000025900	Rp1	retinitis pigmentosa 1 (human)	-117356	RP23-177A20.1	ENSMUST00000195384.1	intronic	intronic	-0.0795263	-0.637506	0.0562872	0.814283	0.910448
chr1	4345286	4345395	110	*	PND_Adult_NF_peak_1727	55	4.32429	7.51705	5.59157	64	Exon (ENSMUST00000027032.5/19888, exon 4 of 4)	1	4344146	4360314	16169	2	19888	ENSMUST00000027032.5	14919	ENSMUSG00000025900	Rp1	retinitis pigmentosa 1 (human)	-14919	Rp1	ENSMUST00000027032.5	exonic	exonic	0.658968	-1.14013	3.98477	0.056252	0.208974
chr1	4346255	4346462	208	*	PND_Adult_NF_peak_1728	260	9.99993	28.3188	26.0322	110	Exon (ENSMUST00000027032.5/19888, exon 4 of 4)	1	4344146	4360314	16169	2	19888	ENSMUST00000027032.5	13852	ENSMUSG00000025900	Rp1	retinitis pigmentosa 1 (human)	-13852	Rp1	ENSMUST00000027032.5	exonic	exonic	0.246399	-0.390971	1.16222	0.290691	0.532928
chr1	4347611	4347801	191	*	PND_Adult_NF_peak_1729	163	6.88324	18.5062	16.3453	111	Exon (ENSMUST00000027032.5/19888, exon 4 of 4)	1	4344146	4360314	16169	2	19888	ENSMUST00000027032.5	12513	ENSMUSG00000025900	Rp1	retinitis pigmentosa 1 (human)	-12513	Rp1	ENSMUST00000027032.5	exonic	exonic	0.0155739	-1.05936	0.0015203	0.969189	0.986457
chr1	4352290	4352731	442	*	PND_Adult_NF_peak_1730	454	13.639	47.8971	45.449	183	Exon (ENSMUST00000208660.1/19888, exon 2 of 30)	1	4344146	4360314	16169	2	19888	ENSMUST00000027032.5	7583	ENSMUSG00000025900	Rp1	retinitis pigmentosa 1 (human)	-7583	Rp1	ENSMUST00000027032.5	exonic	exonic	0.859683	0.908325	5.14507	0.0438978	0.180657
chr1	4388227	4388465	239	*	PND_Adult_NF_peak_1732	184	8.10805	20.6158	18.4212	177	Intron (ENSMUST00000208660.1/19888, intron 1 of 29)	1	4292981	4409187	116207	2	19888	ENSMUST00000194992.6	20722	ENSMUSG00000025900	Rp1	retinitis pigmentosa 1 (human)	-20722	Rp1	ENSMUST00000194992.6	intronic	intronic	0.025578	-1.27088	0.00401742	0.949936	0.977728
chr1	4394859	4394943	85	*	PND_Adult_NF_peak_1733	71	4.86483	9.14834	7.17275	37	Intron (ENSMUST00000208660.1/19888, intron 1 of 29)	1	4292981	4409187	116207	2	19888	ENSMUST00000194992.6	14244	ENSMUSG00000025900	Rp1	retinitis pigmentosa 1 (human)	-14244	Rp1	ENSMUST00000194992.6	intronic	intronic	-0.267091	-0.50915	0.927514	0.34419	0.584296
chr1	4395023	4395459	437	*	PND_Adult_NF_peak_1734	1008	24.8647	103.569	100.837	120	Intron (ENSMUST00000208660.1/19888, intron 1 of 29)	1	4292981	4409187	116207	2	19888	ENSMUST00000194992.6	13728	ENSMUSG00000025900	Rp1	retinitis pigmentosa 1 (human)	-13728	Rp1	ENSMUST00000194992.6	intronic	intronic	0.0373863	1.26123	0.0456282	0.832483	0.920178
chr1	4412396	4412759	364	*	PND_Adult_NF_peak_1735	237	9.45939	26.0552	23.7932	177	Distal Intergenic	1	4290846	4409241	118396	2	19888	ENSMUST00000208793.1	-3155	ENSMUSG00000025900	Rp1	retinitis pigmentosa 1 (human)	3155	Rp1	ENSMUST00000208660.1	intergenic	intergenic	-0.164678	-0.16838	0.539745	0.468971	0.68885
chr1	4416815	4416979	165	*	PND_Adult_NF_peak_1736	560	16.4864	58.5453	56.0288	110	Distal Intergenic	1	4290846	4409241	118396	2	19888	ENSMUST00000208793.1	-7574	ENSMUSG00000025900	Rp1	retinitis pigmentosa 1 (human)	7574	Rp1	ENSMUST00000208660.1	intergenic	intergenic	0.37536	-0.575534	1.47417	0.235367	0.474154
chr1	4456478	4457133	656	*	PND_Adult_NF_peak_1739	222	8.94569	24.4432	22.2013	351	Distal Intergenic	1	4492465	4493735	1271	2	20671	ENSMUST00000191939.1	36602	ENSMUSG00000025902	Sox17	SRY (sex determining region Y)-box 17	-36471	Sox17	ENSMUST00000192505.1	intergenic	intergenic	-0.000711387	1.46483	2.4345e-05	0.9961	0.998281
chr1	4471404	4471764	361	*	PND_Adult_NF_peak_1741	55	4.32429	7.51705	5.59157	307	Distal Intergenic	1	4492465	4493735	1271	2	20671	ENSMUST00000191939.1	21971	ENSMUSG00000025902	Sox17	SRY (sex determining region Y)-box 17	-21840	Sox17	ENSMUST00000192505.1	intergenic	intergenic	-0.0734508	-0.387879	0.0686207	0.795375	0.90022
chr1	4479218	4479371	154	*	PND_Adult_NF_peak_1742	78	5.03373	9.8051	7.81689	44	Distal Intergenic	1	4492465	4493735	1271	2	20671	ENSMUST00000191939.1	14364	ENSMUSG00000025902	Sox17	SRY (sex determining region Y)-box 17	-14233	Sox17	ENSMUST00000192505.1	intergenic	intergenic	-0.07661	-0.575588	0.0861709	0.771383	0.886412
chr1	4479674	4479962	289	*	PND_Adult_NF_peak_1743	237	9.45939	26.0552	23.7932	217	Distal Intergenic	1	4492465	4493735	1271	2	20671	ENSMUST00000191939.1	13773	ENSMUSG00000025902	Sox17	SRY (sex determining region Y)-box 17	-13642	Sox17	ENSMUST00000192505.1	intergenic	intergenic	-0.126708	0.466898	0.44731	0.509383	0.718618
chr1	4491657	4491947	291	*	PND_Adult_NF_peak_1744	165	4.03468	18.7432	16.5761	116	3' UTR	1	4492465	4493735	1271	2	20671	ENSMUST00000191939.1	1788	ENSMUSG00000025902	Sox17	SRY (sex determining region Y)-box 17	-1657	Sox17	ENSMUST00000192505.1	exonic	exonic	0.0258332	1.35469	0.0388301	0.845285	0.92659
chr1	4492031	4493237	1207	*	PND_Adult_NF_peak_1745	695	8.01284	72.1158	69.5259	502	Promoter	1	4492465	4493735	1271	2	20671	ENSMUST00000191939.1	498	ENSMUSG00000025902	Sox17	SRY (sex determining region Y)-box 17	-367	Sox17	ENSMUST00000192505.1	exonic	proximal <=1000bp	0.0832379	3.87658	0.855845	0.363227	0.601618
chr1	4493365	4493561	197	*	PND_Adult_NF_peak_1746	80	2.81604	10.0354	8.03624	119	Promoter	1	4492465	4493735	1271	2	20671	ENSMUST00000191939.1	174	ENSMUSG00000025902	Sox17	SRY (sex determining region Y)-box 17	-43	Sox17	ENSMUST00000192505.1	exonic	proximal <=1000bp	0.124905	1.35181	0.723294	0.402662	0.63565
chr1	4496535	4496626	92	*	PND_Adult_NF_peak_1747	32	2.14306	5.04553	3.2292	17	Promoter	1	4490931	4496413	5483	2	20671	ENSMUST00000027035.9	-122	ENSMUSG00000025902	Sox17	SRY (sex determining region Y)-box 17	0	RP23-285G23.2	ENSMUST00000193450.1	exonic	TSS	-0.457741	0.45937	5.4873	0.0269032	0.134921
chr1	4497023	4497135	113	*	PND_Adult_NF_peak_1748	77	2.8866	9.68857	7.70263	35	Promoter	1	4491390	4497354	5965	2	20671	ENSMUST00000192650.5	219	ENSMUSG00000025902	Sox17	SRY (sex determining region Y)-box 17	-219	Sox17	ENSMUST00000192650.5	exonic	proximal <=1000bp	0.158946	1.06647	0.799838	0.379169	0.61551
chr1	4497344	4497635	292	*	PND_Adult_NF_peak_1749	85	3.24118	10.5115	8.50382	179	Promoter	1	4491390	4497354	5965	2	20671	ENSMUST00000192650.5	0	ENSMUSG00000025902	Sox17	SRY (sex determining region Y)-box 17	0	Sox17	ENSMUST00000192650.5	exonic	TSS	0.0912404	1.55872	0.277462	0.602874	0.784717
chr1	4522955	4523131	177	*	PND_Adult_NF_peak_1752	41	3.21304	5.96231	4.10578	131	Exon (ENSMUST00000195361.1/ENSMUST00000195361.1, exon 1 of 2)	1	4491390	4497354	5965	2	20671	ENSMUST00000192650.5	-25601	ENSMUSG00000025902	Sox17	SRY (sex determining region Y)-box 17	50	RP23-285G23.3	ENSMUST00000195361.1	exonic	proximal <=1000bp	-0.539149	-0.221874	4.8448	0.0366033	0.162632
chr1	4523227	4523453	227	*	PND_Adult_NF_peak_1753	175	6.3008	19.7493	17.5674	128	Exon (ENSMUST00000195361.1/ENSMUST00000195361.1, exon 1 of 2)	1	4491390	4497354	5965	2	20671	ENSMUST00000192650.5	-25873	ENSMUSG00000025902	Sox17	SRY (sex determining region Y)-box 17	322	RP23-285G23.3	ENSMUST00000195361.1	exonic	proximal <=1000bp	0.291407	0.380706	2.27021	0.143676	0.359185
chr1	4525727	4525887	161	*	PND_Adult_NF_peak_1754	143	5.68846	16.4734	14.3453	70	Exon (ENSMUST00000195361.1/ENSMUST00000195361.1, exon 2 of 2)	1	4491390	4497354	5965	2	20671	ENSMUST00000192650.5	-28373	ENSMUSG00000025902	Sox17	SRY (sex determining region Y)-box 17	2822	RP23-285G23.3	ENSMUST00000195361.1	exonic	exonic	-0.0329734	-0.027802	0.0187037	0.89225	0.950126
chr1	4526088	4526287	200	*	PND_Adult_NF_peak_1755	153	5.91421	17.4655	15.3208	55	Exon (ENSMUST00000195361.1/ENSMUST00000195361.1, exon 2 of 2)	1	4491390	4497354	5965	2	20671	ENSMUST00000192650.5	-28734	ENSMUSG00000025902	Sox17	SRY (sex determining region Y)-box 17	-2730	Gm22307	ENSMUST00000180019.1	exonic	exonic	-0.0466505	-0.0242372	0.0300253	0.863752	0.935928
chr1	4543874	4544515	642	*	PND_Adult_NF_peak_1756	434	13.064	45.9131	43.4781	427	Distal Intergenic	1	4491390	4497354	5965	2	20671	ENSMUST00000192650.5	-46520	ENSMUSG00000025902	Sox17	SRY (sex determining region Y)-box 17	8588	RP23-285G23.4	ENSMUST00000193889.1	intergenic	intergenic	-0.176439	1.15765	1.0435	0.316218	0.55795
chr1	4571348	4572174	827	*	PND_Adult_NF_peak_1758	591	13.3945	61.6631	59.1287	306	Distal Intergenic	1	4491390	4497354	5965	2	20671	ENSMUST00000192650.5	-73994	ENSMUSG00000025902	Sox17	SRY (sex determining region Y)-box 17	-14078	RP23-37D15.1	ENSMUST00000195771.1	intergenic	intergenic	-0.143921	2.12077	1.50653	0.230429	0.468706
chr1	4591044	4591495	452	*	PND_Adult_NF_peak_1761	321	10.6271	34.5098	32.1645	304	Distal Intergenic	1	4491390	4497354	5965	2	20671	ENSMUST00000192650.5	-93690	ENSMUSG00000025902	Sox17	SRY (sex determining region Y)-box 17	4792	RP23-37D15.1	ENSMUST00000195771.1	intergenic	intergenic	0.616101	1.06837	17.3848	0.000289478	0.00881621
chr1	4604505	4605043	539	*	PND_Adult_NF_peak_1763	1130	23.2007	115.841	113.061	406	Distal Intergenic	1	4491390	4497354	5965	2	20671	ENSMUST00000192650.5	-107151	ENSMUSG00000025902	Sox17	SRY (sex determining region Y)-box 17	-5428	RP23-37D15.2	ENSMUST00000192738.1	intergenic	intergenic	0.239683	1.1742	1.85937	0.184136	0.412809
chr1	4610042	4610149	108	*	PND_Adult_NF_peak_1764	30	2.80944	4.81909	3.01004	6	Distal Intergenic	1	4491390	4497354	5965	2	20671	ENSMUST00000192650.5	-112688	ENSMUSG00000025902	Sox17	SRY (sex determining region Y)-box 17	-322	RP23-37D15.2	ENSMUST00000192738.1	intergenic	proximal <=1000bp	-0.225061	-0.859342	0.369846	0.54825	0.747664
chr1	4610295	4610463	169	*	PND_Adult_NF_peak_1765	99	4.55288	12.0252	9.97992	73	Distal Intergenic	1	4491390	4497354	5965	2	20671	ENSMUST00000192650.5	-112941	ENSMUSG00000025902	Sox17	SRY (sex determining region Y)-box 17	-8	RP23-37D15.2	ENSMUST00000192738.1	intergenic	proximal <=1000bp	0.121367	-0.0406701	0.21984	0.642985	0.810784
chr1	4614122	4614453	332	*	PND_Adult_NF_peak_1766	2401	33.1787	243.351	240.159	145	Distal Intergenic	1	4491390	4497354	5965	2	20671	ENSMUST00000192650.5	-116768	ENSMUSG00000025902	Sox17	SRY (sex determining region Y)-box 17	3651	RP23-37D15.2	ENSMUST00000192738.1	intergenic	intergenic	-0.23956	1.67493	3.11078	0.0892687	0.273544
chr1	4653804	4654403	600	*	PND_Adult_NF_peak_1769	237	9.45939	26.0552	23.7932	272	Distal Intergenic	1	4783572	4785692	2121	2	27395	ENSMUST00000132625.1	131289	ENSMUSG00000033845	Mrpl15	mitochondrial ribosomal protein L15	-35000	RP23-34E15.1	ENSMUST00000182774.1	intergenic	intergenic	-0.391829	0.986122	6.26704	0.0187562	0.109104
chr1	4673563	4673797	235	*	PND_Adult_NF_peak_1770	2522	43.9419	255.512	252.285	104	Distal Intergenic	1	4783572	4785692	2121	2	27395	ENSMUST00000132625.1	111895	ENSMUSG00000033845	Mrpl15	mitochondrial ribosomal protein L15	-15606	RP23-34E15.1	ENSMUST00000182774.1	intergenic	intergenic	0.116437	0.712526	0.518549	0.477746	0.695447
chr1	4688119	4688373	255	*	PND_Adult_NF_peak_1772	336	8.533	36.0322	33.6742	122	Exon (ENSMUST00000182774.1/ENSMUST00000182774.1, exon 1 of 1)	1	4783572	4785692	2121	2	27395	ENSMUST00000132625.1	97319	ENSMUSG00000033845	Mrpl15	mitochondrial ribosomal protein L15	-1030	RP23-34E15.1	ENSMUST00000182774.1	exonic	exonic	-0.0514637	0.589674	0.0669752	0.797786	0.901562
chr1	4688482	4688599	118	*	PND_Adult_NF_peak_1773	43	3.1561	6.23775	4.36276	60	Exon (ENSMUST00000182774.1/ENSMUST00000182774.1, exon 1 of 1)	1	4783572	4785692	2121	2	27395	ENSMUST00000132625.1	97093	ENSMUSG00000033845	Mrpl15	mitochondrial ribosomal protein L15	-804	RP23-34E15.1	ENSMUST00000182774.1	exonic	proximal <=1000bp	-0.0271114	-0.375865	0.0123962	0.912185	0.959967
chr1	4688800	4688998	199	*	PND_Adult_NF_peak_1774	162	5.67596	18.4151	16.2553	150	Exon (ENSMUST00000182774.1/ENSMUST00000182774.1, exon 1 of 1)	1	4783572	4785692	2121	2	27395	ENSMUST00000132625.1	96694	ENSMUSG00000033845	Mrpl15	mitochondrial ribosomal protein L15	-405	RP23-34E15.1	ENSMUST00000182774.1	exonic	proximal <=1000bp	0.542011	0.478888	8.82402	0.00623506	0.0567947
chr1	4689203	4689432	230	*	PND_Adult_NF_peak_1775	222	6.72529	24.5082	22.2657	164	Exon (ENSMUST00000182774.1/ENSMUST00000182774.1, exon 1 of 1)	1	4783572	4785692	2121	2	27395	ENSMUST00000132625.1	96260	ENSMUSG00000033845	Mrpl15	mitochondrial ribosomal protein L15	0	RP23-34E15.1	ENSMUST00000182774.1	exonic	TSS	-0.345817	0.599144	4.02594	0.0550786	0.206482
chr1	4692678	4692818	141	*	PND_Adult_NF_peak_1777	374	8.86942	39.8543	37.4649	62	Exon (ENSMUST00000193443.1/ENSMUST00000193443.1, exon 1 of 1)	1	4783572	4785692	2121	2	27395	ENSMUST00000132625.1	92874	ENSMUSG00000033845	Mrpl15	mitochondrial ribosomal protein L15	-606	RP23-34E15.2	ENSMUST00000193443.1	exonic	proximal <=1000bp	0.0706673	-0.878551	0.0427078	0.837851	0.922831
chr1	4706574	4706978	405	*	PND_Adult_NF_peak_1779	1597	30.4393	162.709	159.765	270	Distal Intergenic	1	4783572	4785692	2121	2	27395	ENSMUST00000132625.1	78714	ENSMUSG00000033845	Mrpl15	mitochondrial ribosomal protein L15	13150	RP23-34E15.2	ENSMUST00000193443.1	intergenic	intergenic	0.370508	1.04782	4.66305	0.0400117	0.171091
chr1	4766715	4767004	290	*	PND_Adult_NF_peak_1781	462	10.1606	48.6939	46.2399	179	Distal Intergenic	1	4783572	4785692	2121	2	27395	ENSMUST00000132625.1	18688	ENSMUSG00000033845	Mrpl15	mitochondrial ribosomal protein L15	-4127	RP23-34E15.4	ENSMUST00000193658.1	intergenic	intergenic	0.142878	1.26141	0.818707	0.373687	0.610715
chr1	4767186	4767666	481	*	PND_Adult_NF_peak_1782	244	6.99385	26.7147	24.4468	62	Distal Intergenic	1	4783572	4785692	2121	2	27395	ENSMUST00000132625.1	18026	ENSMUSG00000033845	Mrpl15	mitochondrial ribosomal protein L15	-3465	RP23-34E15.4	ENSMUST00000193658.1	intergenic	intergenic	-0.0729185	1.51772	0.257534	0.616004	0.793414
chr1	4768507	4768635	129	*	PND_Adult_NF_peak_1783	208	6.5434	23.0654	20.8396	29	Distal Intergenic	1	4783572	4785692	2121	2	27395	ENSMUST00000132625.1	17057	ENSMUSG00000033845	Mrpl15	mitochondrial ribosomal protein L15	-2496	RP23-34E15.4	ENSMUST00000193658.1	intergenic	intergenic	0.848699	-0.918309	6.99111	0.0135698	0.0898126
chr1	4769981	4770222	242	*	PND_Adult_NF_peak_1784	62	3.64591	8.18451	6.24415	54	Downstream (2-3kb)	1	4783572	4785692	2121	2	27395	ENSMUST00000132625.1	15470	ENSMUSG00000033845	Mrpl15	mitochondrial ribosomal protein L15	-909	RP23-34E15.4	ENSMUST00000193658.1	intergenic	proximal <=1000bp	0.342376	-0.528153	1.43624	0.241325	0.480794
chr1	4785340	4786019	680	*	PND_Adult_NF_peak_1787	1741	24.0003	177.144	174.152	406	Promoter	1	4783572	4785692	2121	2	27395	ENSMUST00000132625.1	0	ENSMUSG00000033845	Mrpl15	mitochondrial ribosomal protein L15	0	Mrpl15	ENSMUST00000132625.1	exonic	TSS	0.406931	3.07257	13.4453	0.00108011	0.0198307
chr1	4802669	4802847	179	*	PND_Adult_NF_peak_1788	69	3.83925	8.94989	6.98558	99	Distal Intergenic	1	4807788	4848410	40623	1	18777	ENSMUST00000134384.7	-4941	ENSMUSG00000025903	Lypla1	lysophospholipase 1	-4941	Lypla1	ENSMUST00000134384.7	intergenic	intergenic	0.951087	-0.726225	11.6163	0.00209621	0.0296092
chr1	4807462	4808216	755	*	PND_Adult_NF_peak_1789	2822	24.4828	285.516	282.202	274	Promoter	1	4807788	4848410	40623	1	18777	ENSMUST00000134384.7	0	ENSMUSG00000025903	Lypla1	lysophospholipase 1	0	Lypla1	ENSMUST00000134384.7	exonic	TSS	0.0900001	3.84726	0.950773	0.338314	0.578844
chr1	4835725	4835966	242	*	PND_Adult_NF_peak_1792	283	10.5405	30.6286	28.3187	108	Promoter	1	4836905	4842827	5923	1	18777	ENSMUST00000141278.1	-939	ENSMUSG00000025903	Lypla1	lysophospholipase 1	-939	Lypla1	ENSMUST00000141278.1	intronic	proximal <=1000bp	-0.0747012	-1.14208	0.0338455	0.855432	0.931737
chr1	4847120	4847348	229	*	PND_Adult_NF_peak_1793	216	8.91886	23.8403	21.6041	163	Intron (ENSMUST00000134384.7/18777, intron 9 of 9)	1	4836905	4842827	5923	1	18777	ENSMUST00000141278.1	10215	ENSMUSG00000025903	Lypla1	lysophospholipase 1	10215	Lypla1	ENSMUST00000141278.1	intronic	intronic	0.565453	-0.890674	2.90902	0.0997463	0.291572
chr1	4855436	4855666	231	*	PND_Adult_NF_peak_1794	993	7.17589	102.096	99.3703	113	Intron (ENSMUST00000155020.1/18777, intron 7 of 9)	1	4857814	4897905	40092	1	21399	ENSMUST00000081551.13	-2148	ENSMUSG00000033813	Tcea1	transcription elongation factor A (SII) 1	-2148	Tcea1	ENSMUST00000081551.13	intronic	intronic	-0.488103	1.90306	11.3855	0.00228523	0.0312088
chr1	4856293	4856383	91	*	PND_Adult_NF_peak_1795	41	1.98191	6.02663	4.1572	71	Intron (ENSMUST00000155020.1/18777, intron 7 of 9)	1	4857814	4897905	40092	1	21399	ENSMUST00000081551.13	-1431	ENSMUSG00000033813	Tcea1	transcription elongation factor A (SII) 1	-1431	Tcea1	ENSMUST00000081551.13	intronic	intronic	-0.189889	-0.173293	0.674886	0.418661	0.648945
chr1	4857423	4858421	999	*	PND_Adult_NF_peak_1796	4910	19.6018	494.948	491.051	274	Promoter	1	4857814	4897905	40092	1	21399	ENSMUST00000081551.13	0	ENSMUSG00000033813	Tcea1	transcription elongation factor A (SII) 1	0	Tcea1	ENSMUST00000081551.13	exonic	TSS	0.174532	4.95979	4.1401	0.0519659	0.199325
chr1	4882592	4882835	244	*	PND_Adult_NF_peak_1799	462	14.0293	48.7497	46.2954	115	Intron (ENSMUST00000155020.1/18777, intron 9 of 9)	1	4858038	4897909	39872	1	21399	ENSMUST00000165720.2	24554	ENSMUSG00000033813	Tcea1	transcription elongation factor A (SII) 1	1941	RP24-426M1.2	ENSMUST00000078030.4	intronic	intronic	0.0731663	0.034336	0.0825362	0.776117	0.889322
chr1	4911957	4912317	361	*	PND_Adult_NF_peak_1801	146	6.71318	16.7781	14.6421	258	3' UTR	1	4858038	4897909	39872	1	21399	ENSMUST00000165720.2	53919	ENSMUSG00000033813	Tcea1	transcription elongation factor A (SII) 1	5096	RP24-426M1.4	ENSMUST00000194052.1	exonic	exonic	0.104153	0.834358	0.260366	0.614119	0.792185
chr1	4923713	4924011	299	*	PND_Adult_NF_peak_1802	263	9.066	28.5959	26.307	210	5' UTR	1	4858038	4897909	39872	1	21399	ENSMUST00000165720.2	65675	ENSMUSG00000033813	Tcea1	transcription elongation factor A (SII) 1	-3288	RP24-141F9.1	ENSMUST00000168963.1	exonic	exonic	-0.414798	0.493005	3.94247	0.057487	0.211839
chr1	4924181	4924374	194	*	PND_Adult_NF_peak_1803	35	3.35848	5.41969	3.57887	147	Intron (ENSMUST00000002533.14/58175, intron 1 of 4)	1	4858038	4897909	39872	1	21399	ENSMUST00000165720.2	66143	ENSMUSG00000033813	Tcea1	transcription elongation factor A (SII) 1	-2925	RP24-141F9.1	ENSMUST00000168963.1	intronic	intronic	-0.213309	0.277315	1.0029	0.32564	0.56681
chr1	4924456	4924637	182	*	PND_Adult_NF_peak_1804	483	13.3668	50.8497	48.381	120	Intron (ENSMUST00000002533.14/58175, intron 1 of 4)	1	4858038	4897909	39872	1	21399	ENSMUST00000165720.2	66418	ENSMUSG00000033813	Tcea1	transcription elongation factor A (SII) 1	-2662	RP24-141F9.1	ENSMUST00000168963.1	intronic	intronic	-0.460383	-0.235823	3.6612	0.0665212	0.230644
chr1	4931915	4932140	226	*	PND_Adult_NF_peak_1805	670	18.6485	69.6245	67.0469	121	Intron (ENSMUST00000002533.14/58175, intron 1 of 4)	1	4858038	4897909	39872	1	21399	ENSMUST00000165720.2	73877	ENSMUSG00000033813	Tcea1	transcription elongation factor A (SII) 1	4616	RP24-141F9.1	ENSMUST00000168963.1	intronic	intronic	1.40631	-0.859299	16.6925	0.000361269	0.0100992
chr1	4938837	4939032	196	*	PND_Adult_NF_peak_1806	391	12.9729	41.5363	39.1328	103	Exon (ENSMUST00000194114.1/ENSMUST00000194114.1, exon 1 of 1)	1	4910402	5018735	108334	2	58175	ENSMUST00000119256.7	79703	ENSMUSG00000002459	Rgs20	regulator of G-protein signaling 20	-1678	RP24-141F9.2	ENSMUST00000194114.1	exonic	exonic	-0.482693	-0.870805	2.23771	0.14646	0.363171
chr1	4947156	4947618	463	*	PND_Adult_NF_peak_1808	294	10.8107	31.8	29.4789	106	Intron (ENSMUST00000002533.14/58175, intron 1 of 4)	1	4910402	5018735	108334	2	58175	ENSMUST00000119256.7	71117	ENSMUSG00000002459	Rgs20	regulator of G-protein signaling 20	6446	RP24-141F9.2	ENSMUST00000194114.1	intronic	intronic	-0.0155628	0.102351	0.00501505	0.944074	0.975154
chr1	4959244	4959361	118	*	PND_Adult_NF_peak_1809	194	8.37832	21.6771	19.4682	39	Intron (ENSMUST00000002533.14/58175, intron 1 of 4)	1	4910402	5018735	108334	2	58175	ENSMUST00000119256.7	59374	ENSMUSG00000002459	Rgs20	regulator of G-protein signaling 20	-11496	AC102242.1	ENSMUST00000144339.1	intronic	intronic	-0.912464	-1.34634	4.00036	0.0558042	0.208019
chr1	4976590	4976788	199	*	PND_Adult_NF_peak_1811	784	20.8107	81.1039	78.4697	128	Exon (ENSMUST00000144339.1/ENSMUST00000144339.1, exon 3 of 3)	1	4910402	5018735	108334	2	58175	ENSMUST00000119256.7	41947	ENSMUSG00000002459	Rgs20	regulator of G-protein signaling 20	5733	AC102242.1	ENSMUST00000144339.1	exonic	exonic	0.274088	-0.458987	1.24685	0.274148	0.516032
chr1	4991620	4991942	323	*	PND_Adult_NF_peak_1812	6094	46.4347	613.659	609.433	187	Intron (ENSMUST00000002533.14/58175, intron 1 of 4)	1	4910402	5018735	108334	2	58175	ENSMUST00000119256.7	26793	ENSMUSG00000002459	Rgs20	regulator of G-protein signaling 20	20763	AC102242.1	ENSMUST00000144339.1	intronic	intronic	-0.135063	3.00214	1.5554	0.223217	0.460315
chr1	5009541	5009659	119	*	PND_Adult_NF_peak_1813	153	7.29725	17.5188	15.3698	51	Intron (ENSMUST00000002533.14/58175, intron 1 of 4)	1	4910402	5018735	108334	2	58175	ENSMUST00000119256.7	9076	ENSMUSG00000002459	Rgs20	regulator of G-protein signaling 20	-9076	Rgs20	ENSMUST00000119256.7	intronic	intronic	0.0300133	-0.90845	0.00945451	0.92327	0.965223
chr1	5017975	5018197	223	*	PND_Adult_NF_peak_1814	60	2.73519	7.95262	6.01746	172	Promoter	1	4910402	5018735	108334	2	58175	ENSMUST00000119256.7	538	ENSMUSG00000002459	Rgs20	regulator of G-protein signaling 20	-538	Rgs20	ENSMUST00000119256.7	intronic	proximal <=1000bp	0.0887076	0.807258	0.241559	0.627117	0.800776
chr1	5018444	5018607	164	*	PND_Adult_NF_peak_1815	78	2.98693	9.79329	7.80532	105	Promoter	1	4910402	5018735	108334	2	58175	ENSMUST00000119256.7	128	ENSMUSG00000002459	Rgs20	regulator of G-protein signaling 20	-128	Rgs20	ENSMUST00000119256.7	exonic	proximal <=1000bp	0.0670453	0.789921	0.173307	0.680532	0.834465
chr1	5018731	5018832	102	*	PND_Adult_NF_peak_1816	65	2.79417	8.55188	6.59585	21	Promoter	1	4910402	5018735	108334	2	58175	ENSMUST00000119256.7	0	ENSMUSG00000002459	Rgs20	regulator of G-protein signaling 20	0	Rgs20	ENSMUST00000119256.7	exonic	TSS	-0.129313	0.358957	0.374086	0.545982	0.746019
chr1	5019305	5019698	394	*	PND_Adult_NF_peak_1817	1498	13.6165	152.811	149.899	83	Promoter	1	4910474	5019379	108906	2	58175	ENSMUST00000170566.1	0	ENSMUSG00000002459	Rgs20	regulator of G-protein signaling 20	0	Rgs20	ENSMUST00000170566.1	exonic	TSS	-0.0252505	2.34146	0.0435996	0.836192	0.922175
chr1	5022838	5022990	153	*	PND_Adult_NF_peak_1818	1561	14.0196	159.055	156.123	57	Intron (ENSMUST00000118000.7/58175, intron 1 of 5)	1	4909576	5019539	109964	2	58175	ENSMUST00000002533.14	-3299	ENSMUSG00000002459	Rgs20	regulator of G-protein signaling 20	3299	Rgs20	ENSMUST00000002533.14	intronic	intronic	0.00225034	1.75546	0.000279519	0.986786	0.99436
chr1	5083007	5083603	597	*	PND_Adult_NF_peak_1819	1926	19.4201	195.733	192.683	88	Promoter	1	5083080	5162529	79450	1	108664	ENSMUST00000044369.12	0	ENSMUSG00000033793	Atp6v1h	ATPase, H+ transporting, lysosomal V1 subunit H	0	Atp6v1h	ENSMUST00000044369.12	exonic	TSS	0.363701	3.6759	10.141	0.00368122	0.0414141
chr1	5109396	5109796	401	*	PND_Adult_NF_peak_1820	80	4.14023	10.0169	8.01804	328	Intron (ENSMUST00000192847.5/108664, intron 7 of 12)	1	5083164	5099777	16614	1	108664	ENSMUST00000192142.1	26232	ENSMUSG00000033793	Atp6v1h	ATPase, H+ transporting, lysosomal V1 subunit H	26232	Atp6v1h	ENSMUST00000192142.1	intronic	intronic	0.822933	-0.864575	5.4065	0.0279497	0.13807
chr1	5109927	5110364	438	*	PND_Adult_NF_peak_1821	244	6.44286	26.7427	24.4745	382	Intron (ENSMUST00000192847.5/108664, intron 7 of 12)	1	5083164	5099777	16614	1	108664	ENSMUST00000192142.1	26763	ENSMUSG00000033793	Atp6v1h	ATPase, H+ transporting, lysosomal V1 subunit H	26763	Atp6v1h	ENSMUST00000192142.1	intronic	intronic	0.564696	-0.44837	5.23138	0.030376	0.145455
chr1	5114945	5115127	183	*	PND_Adult_NF_peak_1823	1521	21.9737	155.077	152.158	119	Intron (ENSMUST00000192847.5/108664, intron 7 of 12)	1	5083164	5099777	16614	1	108664	ENSMUST00000192142.1	31781	ENSMUSG00000033793	Atp6v1h	ATPase, H+ transporting, lysosomal V1 subunit H	31781	Atp6v1h	ENSMUST00000192142.1	intronic	intronic	0.0813195	0.578277	0.179362	0.67533	0.831209
chr1	5129621	5129771	151	*	PND_Adult_NF_peak_1825	97	5.67564	11.7657	9.72455	36	Intron (ENSMUST00000192847.5/108664, intron 9 of 12)	1	5083164	5099777	16614	1	108664	ENSMUST00000192142.1	46457	ENSMUSG00000033793	Atp6v1h	ATPase, H+ transporting, lysosomal V1 subunit H	46457	Atp6v1h	ENSMUST00000192142.1	intronic	intronic	0.826038	-0.851889	6.29872	0.0184884	0.108228
chr1	5137198	5137397	200	*	PND_Adult_NF_peak_1827	194	8.37832	21.6771	19.4682	101	Intron (ENSMUST00000192847.5/108664, intron 10 of 12)	1	5083164	5099777	16614	1	108664	ENSMUST00000192142.1	54034	ENSMUSG00000033793	Atp6v1h	ATPase, H+ transporting, lysosomal V1 subunit H	54034	Atp6v1h	ENSMUST00000192142.1	intronic	intronic	0.953642	-1.07301	9.26127	0.00522009	0.0510892
chr1	5158705	5159034	330	*	PND_Adult_NF_peak_1830	4343	47.2416	438.091	434.352	223	Intron (ENSMUST00000192847.5/108664, intron 12 of 12)	1	5083164	5099777	16614	1	108664	ENSMUST00000192142.1	75541	ENSMUSG00000033793	Atp6v1h	ATPase, H+ transporting, lysosomal V1 subunit H	75541	Atp6v1h	ENSMUST00000192142.1	intronic	intronic	-0.506437	2.20872	17.8764	0.000247928	0.00803732
chr1	5164093	5164250	158	*	PND_Adult_NF_peak_1831	173	7.11118	19.4817	17.306	66	Distal Intergenic	1	5083164	5099777	16614	1	108664	ENSMUST00000192142.1	80929	ENSMUSG00000033793	Atp6v1h	ATPase, H+ transporting, lysosomal V1 subunit H	80929	Atp6v1h	ENSMUST00000192142.1	intergenic	intergenic	0.460361	-0.788674	2.80883	0.105472	0.300942
chr1	5165807	5166266	460	*	PND_Adult_NF_peak_1832	89	4.78471	10.9704	8.94843	210	Distal Intergenic	1	5083164	5099777	16614	1	108664	ENSMUST00000192142.1	82643	ENSMUSG00000033793	Atp6v1h	ATPase, H+ transporting, lysosomal V1 subunit H	82643	Atp6v1h	ENSMUST00000192142.1	intergenic	intergenic	0.753517	0.470187	12.312	0.00162189	0.0254336
chr1	5170477	5170631	155	*	PND_Adult_NF_peak_1833	127	5.83898	14.8528	12.7505	67	Distal Intergenic	1	5083164	5099777	16614	1	108664	ENSMUST00000192142.1	87313	ENSMUSG00000033793	Atp6v1h	ATPase, H+ transporting, lysosomal V1 subunit H	87313	Atp6v1h	ENSMUST00000192142.1	intergenic	intergenic	0.707051	-0.890816	3.85707	0.0600747	0.217299
chr1	5170830	5171037	208	*	PND_Adult_NF_peak_1834	100	5.29817	12.1138	10.0671	158	Distal Intergenic	1	5083164	5099777	16614	1	108664	ENSMUST00000192142.1	87666	ENSMUSG00000033793	Atp6v1h	ATPase, H+ transporting, lysosomal V1 subunit H	87666	Atp6v1h	ENSMUST00000192142.1	intergenic	intergenic	0.88634	-0.604227	9.32432	0.00508923	0.0503406
chr1	5183512	5183875	364	*	PND_Adult_NF_peak_1836	106	5.9459	12.6794	10.6183	264	Distal Intergenic	1	5083164	5099777	16614	1	108664	ENSMUST00000192142.1	100348	ENSMUSG00000033793	Atp6v1h	ATPase, H+ transporting, lysosomal V1 subunit H	-93462	RP23-267J18.11	ENSMUST00000193351.1	intergenic	intergenic	-0.0478251	-0.109303	0.0290385	0.865995	0.937114
chr1	5206670	5207061	392	*	PND_Adult_NF_peak_1837	237	9.45939	26.0552	23.7932	306	Distal Intergenic	1	5083164	5099777	16614	1	108664	ENSMUST00000192142.1	123506	ENSMUSG00000033793	Atp6v1h	ATPase, H+ transporting, lysosomal V1 subunit H	-70276	RP23-267J18.11	ENSMUST00000193351.1	intergenic	intergenic	0.437218	0.397794	4.95143	0.0347548	0.157885
chr1	5226057	5226413	357	*	PND_Adult_NF_peak_1838	97	5.47592	11.7481	9.71285	180	Distal Intergenic	1	5083164	5099777	16614	1	108664	ENSMUST00000192142.1	142893	ENSMUSG00000033793	Atp6v1h	ATPase, H+ transporting, lysosomal V1 subunit H	-50924	RP23-267J18.11	ENSMUST00000193351.1	intergenic	intergenic	0.142214	0.22329	0.557507	0.46182	0.683561
chr1	5226777	5226920	144	*	PND_Adult_NF_peak_1839	370	11.9809	39.426	37.0396	78	Distal Intergenic	1	5083164	5099777	16614	1	108664	ENSMUST00000192142.1	143613	ENSMUSG00000033793	Atp6v1h	ATPase, H+ transporting, lysosomal V1 subunit H	-50417	RP23-267J18.11	ENSMUST00000193351.1	intergenic	intergenic	0.18817	-0.833762	0.387735	0.538798	0.740696
chr1	5227929	5228135	207	*	PND_Adult_NF_peak_1840	234	8.76103	25.6933	23.4372	99	Distal Intergenic	1	5083164	5099777	16614	1	108664	ENSMUST00000192142.1	144765	ENSMUSG00000033793	Atp6v1h	ATPase, H+ transporting, lysosomal V1 subunit H	-49202	RP23-267J18.11	ENSMUST00000193351.1	intergenic	intergenic	0.220375	-0.710043	0.488564	0.49064	0.704941
chr1	5261346	5261727	382	*	PND_Adult_NF_peak_1844	153	7.29725	17.5188	15.3698	79	Distal Intergenic	1	5083164	5099777	16614	1	108664	ENSMUST00000192142.1	178182	ENSMUSG00000033793	Atp6v1h	ATPase, H+ transporting, lysosomal V1 subunit H	-15610	RP23-267J18.11	ENSMUST00000193351.1	intergenic	intergenic	0.393873	-0.63085	2.28168	0.142708	0.357757
chr1	5283210	5283365	156	*	PND_Adult_NF_peak_1845	285	9.07279	30.8628	28.5511	66	Distal Intergenic	1	5083164	5099777	16614	1	108664	ENSMUST00000192142.1	200046	ENSMUSG00000033793	Atp6v1h	ATPase, H+ transporting, lysosomal V1 subunit H	5873	RP23-267J18.11	ENSMUST00000193351.1	intergenic	intergenic	0.160214	-0.811989	0.29672	0.590487	0.776539
chr1	5285856	5286098	243	*	PND_Adult_NF_peak_1846	1288	21.5534	131.671	128.833	81	Distal Intergenic	1	5083164	5099777	16614	1	108664	ENSMUST00000192142.1	202692	ENSMUSG00000033793	Atp6v1h	ATPase, H+ transporting, lysosomal V1 subunit H	8519	RP23-267J18.11	ENSMUST00000193351.1	intergenic	intergenic	-0.150001	0.783871	0.720134	0.403678	0.636457
chr1	5288163	5288245	83	*	PND_Adult_NF_peak_1847	21	2.59067	3.84141	2.10262	69	Distal Intergenic	1	5083164	5099777	16614	1	108664	ENSMUST00000192142.1	204999	ENSMUSG00000033793	Atp6v1h	ATPase, H+ transporting, lysosomal V1 subunit H	10826	RP23-267J18.11	ENSMUST00000193351.1	intergenic	intergenic	0.380834	-1.19483	1.20017	0.283114	0.525359
chr1	5288340	5288445	106	*	PND_Adult_NF_peak_1848	89	4.66094	11.0102	8.98758	82	Distal Intergenic	1	5083164	5099777	16614	1	108664	ENSMUST00000192142.1	205176	ENSMUSG00000033793	Atp6v1h	ATPase, H+ transporting, lysosomal V1 subunit H	11003	RP23-267J18.11	ENSMUST00000193351.1	intergenic	intergenic	-0.221703	-0.149328	1.06647	0.31105	0.552842
chr1	5288635	5289020	386	*	PND_Adult_NF_peak_1849	165	6.41038	18.7313	16.5643	79	Distal Intergenic	1	5083164	5099777	16614	1	108664	ENSMUST00000192142.1	205471	ENSMUSG00000033793	Atp6v1h	ATPase, H+ transporting, lysosomal V1 subunit H	11298	RP23-267J18.11	ENSMUST00000193351.1	intergenic	intergenic	-0.223621	0.803863	1.81969	0.18873	0.418758
chr1	5516383	5516505	123	*	PND_Adult_NF_peak_1855	71	4.86483	9.14834	7.17275	36	Distal Intergenic	1	5588493	5606131	17639	1	18387	ENSMUST00000160777.7	-71988	ENSMUSG00000025905	Oprk1	opioid receptor, kappa 1	-71961	Oprk1	ENSMUST00000192685.1	intergenic	intergenic	-0.0155316	-0.940593	0.00181576	0.96633	0.985139
chr1	5588272	5588996	725	*	PND_Adult_NF_peak_1857	3813	37.856	384.948	381.357	132	Promoter	1	5588493	5606131	17639	1	18387	ENSMUST00000160777.7	0	ENSMUSG00000025905	Oprk1	opioid receptor, kappa 1	0	Oprk1	ENSMUST00000192685.1	exonic	TSS	0.0724688	3.06452	0.457314	0.504724	0.715177
chr1	5602396	5602730	335	*	PND_Adult_NF_peak_1858	71	4.86483	9.14834	7.17275	275	Exon (ENSMUST00000160777.7/18387, exon 4 of 4)	1	5596518	5603153	6636	1	18387	ENSMUST00000159083.1	5878	ENSMUSG00000025905	Oprk1	opioid receptor, kappa 1	5878	Oprk1	ENSMUST00000159083.1	exonic	exonic	0.51837	-0.270158	3.9671	0.0567642	0.210164
chr1	5616508	5616678	171	*	PND_Adult_NF_peak_1859	480	14.8648	50.5296	48.0627	71	Distal Intergenic	1	5596518	5603153	6636	1	18387	ENSMUST00000159083.1	19990	ENSMUSG00000025905	Oprk1	opioid receptor, kappa 1	-1552	RP23-238E7.2	ENSMUST00000193797.1	intergenic	intergenic	0.32649	-0.514321	1.5295	0.227004	0.464583
chr1	5788412	5788648	237	*	PND_Adult_NF_peak_1863	1132	27.0268	115.994	113.214	171	Distal Intergenic	1	5913707	5917398	3692	2	226304	ENSMUST00000044180.4	128750	ENSMUSG00000033774	Npbwr1	neuropeptides B/W receptor 1	-56024	RP23-354J2.1	ENSMUST00000193807.1	intergenic	intergenic	0.0630364	0.363961	0.0909372	0.765336	0.883119
chr1	5828995	5829085	91	*	PND_Adult_NF_peak_1865	15	2.70268	3.29982	1.58339	73	Distal Intergenic	1	5913707	5917398	3692	2	226304	ENSMUST00000044180.4	88313	ENSMUSG00000033774	Npbwr1	neuropeptides B/W receptor 1	-15587	RP23-354J2.1	ENSMUST00000193807.1	intergenic	intergenic	0.494468	-0.972883	2.16672	0.152769	0.371815
chr1	5829246	5829369	124	*	PND_Adult_NF_peak_1866	106	5.9459	12.6794	10.6183	76	Distal Intergenic	1	5913707	5917398	3692	2	226304	ENSMUST00000044180.4	88029	ENSMUSG00000033774	Npbwr1	neuropeptides B/W receptor 1	-15303	RP23-354J2.1	ENSMUST00000193807.1	intergenic	intergenic	0.433274	-0.340412	3.18434	0.0857668	0.26727
chr1	5915445	5915593	149	*	PND_Adult_NF_peak_1867	136	4.93163	15.7975	13.6782	37	3' UTR	1	5913707	5917398	3692	2	226304	ENSMUST00000044180.4	1805	ENSMUSG00000033774	Npbwr1	neuropeptides B/W receptor 1	-1805	Npbwr1	ENSMUST00000044180.4	exonic	exonic	-0.31208	-0.519803	0.973545	0.332695	0.573451
chr1	5915800	5915925	126	*	PND_Adult_NF_peak_1868	93	4.10938	11.3678	9.3391	46	3' UTR	1	5913707	5917398	3692	2	226304	ENSMUST00000044180.4	1473	ENSMUSG00000033774	Npbwr1	neuropeptides B/W receptor 1	-1473	Npbwr1	ENSMUST00000044180.4	exonic	exonic	-0.280419	-0.353253	1.1651	0.290108	0.532376
chr1	5916314	5916419	106	*	PND_Adult_NF_peak_1869	66	3.54749	8.64525	6.68728	28	Promoter	1	5913707	5917398	3692	2	226304	ENSMUST00000044180.4	979	ENSMUSG00000033774	Npbwr1	neuropeptides B/W receptor 1	-979	Npbwr1	ENSMUST00000044180.4	exonic	proximal <=1000bp	-0.605229	0.420733	9.78389	0.00423653	0.0450181
chr1	5916572	5917171	600	*	PND_Adult_NF_peak_1870	184	5.75142	20.6376	18.4427	534	Promoter	1	5913707	5917398	3692	2	226304	ENSMUST00000044180.4	227	ENSMUSG00000033774	Npbwr1	neuropeptides B/W receptor 1	-227	Npbwr1	ENSMUST00000044180.4	exonic	proximal <=1000bp	-0.0683818	1.63884	0.241337	0.627274	0.800857
chr1	5917273	5917546	274	*	PND_Adult_NF_peak_1871	109	4.44501	12.9806	10.9151	178	Promoter	1	5913707	5917398	3692	2	226304	ENSMUST00000044180.4	0	ENSMUSG00000033774	Npbwr1	neuropeptides B/W receptor 1	0	Npbwr1	ENSMUST00000044180.4	exonic	TSS	-0.176226	0.881124	0.914317	0.347588	0.587554
chr1	5917648	5917991	344	*	PND_Adult_NF_peak_1872	103	4.36083	12.4182	10.3666	291	Promoter	1	5913707	5917398	3692	2	226304	ENSMUST00000044180.4	-250	ENSMUSG00000033774	Npbwr1	neuropeptides B/W receptor 1	250	Npbwr1	ENSMUST00000044180.4	intergenic	proximal <=1000bp	-0.092655	0.921033	0.209415	0.65099	0.815664
chr1	6082676	6083051	376	*	PND_Adult_NF_peak_1880	124	6.48644	14.5631	12.4648	311	Distal Intergenic	1	6206197	6234311	28115	1	12421	ENSMUST00000159906.7	-123146	ENSMUSG00000025907	Rb1cc1	RB1-inducible coiled-coil 1	32631	RP23-74E8.1	ENSMUST00000191956.1	intergenic	intergenic	-0.134063	-0.0555754	0.349051	0.559641	0.755695
chr1	6089796	6089934	139	*	PND_Adult_NF_peak_1881	88	5.40537	10.872	8.85172	91	Distal Intergenic	1	6206197	6234311	28115	1	12421	ENSMUST00000159906.7	-116263	ENSMUSG00000025907	Rb1cc1	RB1-inducible coiled-coil 1	39751	RP23-74E8.1	ENSMUST00000191956.1	intergenic	intergenic	-0.182924	-1.09558	0.256793	0.61651	0.79378
chr1	6133169	6133313	145	*	PND_Adult_NF_peak_1883	115	6.21617	13.6121	11.532	95	Distal Intergenic	1	6206197	6234311	28115	1	12421	ENSMUST00000159906.7	-72884	ENSMUSG00000025907	Rb1cc1	RB1-inducible coiled-coil 1	-72884	Rb1cc1	ENSMUST00000159906.7	intergenic	intergenic	0.0176624	-0.887521	0.00323819	0.955046	0.980015
chr1	6192849	6193056	208	*	PND_Adult_NF_peak_1886	92	4.90914	11.253	9.22626	88	Distal Intergenic	1	6206197	6234311	28115	1	12421	ENSMUST00000159906.7	-13141	ENSMUSG00000025907	Rb1cc1	RB1-inducible coiled-coil 1	-13141	Rb1cc1	ENSMUST00000159906.7	intergenic	intergenic	0.962742	-1.22316	5.96084	0.0215763	0.118324
chr1	6194448	6194654	207	*	PND_Adult_NF_peak_1887	1539	28.1415	156.898	153.972	94	Distal Intergenic	1	6206197	6234311	28115	1	12421	ENSMUST00000159906.7	-11543	ENSMUSG00000025907	Rb1cc1	RB1-inducible coiled-coil 1	-11543	Rb1cc1	ENSMUST00000159906.7	intergenic	intergenic	0.411437	0.520024	4.10816	0.0528165	0.201175
chr1	6214321	6215441	1121	*	PND_Adult_NF_peak_1889	2817	22.8276	285.03	281.718	305	Promoter	1	6214645	6276648	62004	1	12421	ENSMUST00000027040.12	0	ENSMUSG00000025907	Rb1cc1	RB1-inducible coiled-coil 1	0	AC139064.2	ENSMUST00000159618.1	exonic	TSS	0.273769	4.11352	9.90522	0.00403828	0.0437536
chr1	6225854	6226014	161	*	PND_Adult_NF_peak_1890	416	13.5134	44.0637	41.6413	70	Intron (ENSMUST00000159906.7/12421, intron 2 of 5)	1	6228002	6249029	21028	1	12421	ENSMUST00000162795.7	-1988	ENSMUSG00000025907	Rb1cc1	RB1-inducible coiled-coil 1	-1988	Rb1cc1	ENSMUST00000162795.7	intronic	intronic	-0.346855	-0.570213	1.40222	0.246834	0.486736
chr1	6226256	6226332	77	*	PND_Adult_NF_peak_1891	21	2.97295	3.92059	2.1586	37	Intron (ENSMUST00000159906.7/12421, intron 2 of 5)	1	6228002	6249029	21028	1	12421	ENSMUST00000162795.7	-1670	ENSMUSG00000025907	Rb1cc1	RB1-inducible coiled-coil 1	-1670	Rb1cc1	ENSMUST00000162795.7	intronic	intronic	0.025239	-1.27544	0.00408847	0.949496	0.977472
chr1	6257833	6258033	201	*	PND_Adult_NF_peak_1893	115	6.21617	13.6121	11.532	133	Intron (ENSMUST00000027040.12/12421, intron 15 of 23)	1	6260785	6262854	2070	1	12421	ENSMUST00000161183.1	-2752	ENSMUSG00000025907	Rb1cc1	RB1-inducible coiled-coil 1	-2752	Rb1cc1	ENSMUST00000161183.1	intronic	intronic	0.313447	-1.1403	0.873709	0.358345	0.597309
chr1	6276753	6276993	241	*	PND_Adult_NF_peak_1897	450	13.132	47.4711	45.0255	56	Distal Intergenic	1	6270678	6275575	4898	1	12421	ENSMUST00000159656.1	6075	ENSMUSG00000025907	Rb1cc1	RB1-inducible coiled-coil 1	6075	Rb1cc1	ENSMUST00000159656.1	intergenic	intergenic	0.303507	-0.179533	1.61256	0.215137	0.450822
chr1	6277171	6277352	182	*	PND_Adult_NF_peak_1898	328	10.6562	35.1966	32.8462	75	Distal Intergenic	1	6270678	6275575	4898	1	12421	ENSMUST00000159656.1	6493	ENSMUSG00000025907	Rb1cc1	RB1-inducible coiled-coil 1	6493	Rb1cc1	ENSMUST00000159656.1	intergenic	intergenic	0.645842	-0.138169	6.55097	0.0165002	0.10107
chr1	6282495	6283117	623	*	PND_Adult_NF_peak_1899	902	19.1392	92.8984	90.2116	139	Distal Intergenic	1	6270678	6275575	4898	1	12421	ENSMUST00000159656.1	11817	ENSMUSG00000025907	Rb1cc1	RB1-inducible coiled-coil 1	11817	Rb1cc1	ENSMUST00000159656.1	intergenic	intergenic	-0.3832	1.70474	6.16857	0.0196162	0.111884
chr1	6357000	6357264	265	*	PND_Adult_NF_peak_1902	772	15.3253	79.9133	77.2848	127	Distal Intergenic	1	6359218	6394731	35514	1	620393	ENSMUST00000133144.3	-1954	ENSMUSG00000087247	Alkal1	ALK and LTK ligand 1	-1954	Fam150a	ENSMUST00000133144.3	intergenic	intergenic	-0.206533	0.0989233	0.888623	0.35434	0.593559
chr1	6358857	6359400	544	*	PND_Adult_NF_peak_1903	255	7.71552	27.847	25.5668	357	Promoter	1	6359218	6394731	35514	1	620393	ENSMUST00000133144.3	0	ENSMUSG00000087247	Alkal1	ALK and LTK ligand 1	0	Fam150a	ENSMUST00000133144.3	exonic	TSS	0.349901	1.38322	5.06224	0.0329429	0.15284
chr1	6359508	6359613	106	*	PND_Adult_NF_peak_1904	78	4.17489	9.81679	7.82836	40	Promoter	1	6359218	6394731	35514	1	620393	ENSMUST00000133144.3	290	ENSMUSG00000087247	Alkal1	ALK and LTK ligand 1	290	Fam150a	ENSMUST00000133144.3	exonic	proximal <=1000bp	-0.187052	0.0902847	0.850083	0.364822	0.603023
chr1	6360172	6360284	113	*	PND_Adult_NF_peak_1905	47	3.31247	6.63061	4.74533	38	Promoter	1	6359218	6394731	35514	1	620393	ENSMUST00000133144.3	954	ENSMUSG00000087247	Alkal1	ALK and LTK ligand 1	954	Fam150a	ENSMUST00000133144.3	intronic	proximal <=1000bp	-0.053233	-0.796143	0.0287048	0.866745	0.937498
chr1	6382662	6383259	598	*	PND_Adult_NF_peak_1908	330	11.6215	35.3775	33.0241	433	Exon (ENSMUST00000192950.1/ENSMUST00000192950.1, exon 1 of 1)	1	6359218	6394731	35514	1	620393	ENSMUST00000133144.3	23444	ENSMUSG00000087247	Alkal1	ALK and LTK ligand 1	0	RP23-76C20.2	ENSMUST00000192950.1	exonic	TSS	0.761723	1.13837	8.3216	0.0109061	0.0790199
chr1	6400667	6401168	502	*	PND_Adult_NF_peak_1909	88	5.40537	10.872	8.85172	452	Distal Intergenic	1	6359218	6394731	35514	1	620393	ENSMUST00000133144.3	41449	ENSMUSG00000087247	Alkal1	ALK and LTK ligand 1	17561	RP23-76C20.2	ENSMUST00000192950.1	intergenic	intergenic	0.438073	0.185343	4.28691	0.0482491	0.190729
chr1	6406463	6406725	263	*	PND_Adult_NF_peak_1910	772	19.8393	79.8768	77.2485	115	Distal Intergenic	1	6359218	6394731	35514	1	620393	ENSMUST00000133144.3	47245	ENSMUSG00000087247	Alkal1	ALK and LTK ligand 1	23357	RP23-76C20.2	ENSMUST00000192950.1	intergenic	intergenic	0.239062	0.135902	1.00338	0.325526	0.566699
chr1	6417985	6418185	201	*	PND_Adult_NF_peak_1911	143	7.02698	16.5171	14.3843	119	Distal Intergenic	1	6359218	6394731	35514	1	620393	ENSMUST00000133144.3	58767	ENSMUSG00000087247	Alkal1	ALK and LTK ligand 1	-23111	RP23-76C20.4	ENSMUST00000194240.1	intergenic	intergenic	0.171928	-0.888983	0.289943	0.594738	0.779528
chr1	6440489	6440606	118	*	PND_Adult_NF_peak_1912	160	5.2477	18.24	16.0824	68	Exon (ENSMUST00000194240.1/ENSMUST00000194240.1, exon 1 of 2)	1	6487231	6860934	373704	1	240690	ENSMUST00000140079.7	-46625	ENSMUSG00000033740	St18	suppression of tumorigenicity 18	-690	RP23-76C20.4	ENSMUST00000194240.1	exonic	proximal <=1000bp	-0.216273	-0.614575	0.516045	0.478801	0.696274
chr1	6441056	6441870	815	*	PND_Adult_NF_peak_1913	661	12.063	68.7008	66.1284	481	Exon (ENSMUST00000194240.1/ENSMUST00000194240.1, exon 1 of 2)	1	6487231	6860934	373704	1	240690	ENSMUST00000140079.7	-45361	ENSMUSG00000033740	St18	suppression of tumorigenicity 18	0	RP23-76C20.4	ENSMUST00000194240.1	exonic	TSS	0.264572	2.54195	5.65459	0.0248713	0.128717
chr1	6466794	6467340	547	*	PND_Adult_NF_peak_1915	682	14.8329	70.8329	68.2497	444	Distal Intergenic	1	6487231	6860934	373704	1	240690	ENSMUST00000140079.7	-19891	ENSMUSG00000033740	St18	suppression of tumorigenicity 18	-19891	St18	ENSMUST00000140079.7	intergenic	intergenic	0.276894	1.94155	4.15147	0.0516667	0.198677
chr1	6483237	6483517	281	*	PND_Adult_NF_peak_1917	441	14.054	46.6254	44.1848	131	Distal Intergenic	1	6487231	6860934	373704	1	240690	ENSMUST00000140079.7	-3714	ENSMUSG00000033740	St18	suppression of tumorigenicity 18	-3714	St18	ENSMUST00000140079.7	intergenic	intergenic	0.40596	-0.374003	2.51919	0.124295	0.330972
chr1	6594902	6595070	169	*	PND_Adult_NF_peak_1920	216	8.91886	23.8403	21.6041	55	Intron (ENSMUST00000140079.7/240690, intron 2 of 23)	1	6487331	6860940	373610	1	240690	ENSMUST00000131494.7	107571	ENSMUSG00000033740	St18	suppression of tumorigenicity 18	107571	St18	ENSMUST00000131494.7	intronic	intronic	0.514072	-1.23529	1.74811	0.197379	0.42962
chr1	6638838	6639010	173	*	PND_Adult_NF_peak_1923	124	6.48644	14.5631	12.4648	79	Intron (ENSMUST00000140079.7/240690, intron 2 of 23)	1	6730051	6860940	130890	1	240690	ENSMUST00000043578.12	-91041	ENSMUSG00000033740	St18	suppression of tumorigenicity 18	-91041	St18	ENSMUST00000043578.12	intronic	intronic	0.477282	-1.10809	1.64995	0.210048	0.444866
chr1	6661760	6661933	174	*	PND_Adult_NF_peak_1925	106	5.9459	12.6794	10.6183	105	Intron (ENSMUST00000140079.7/240690, intron 2 of 23)	1	6730051	6860940	130890	1	240690	ENSMUST00000043578.12	-68118	ENSMUSG00000033740	St18	suppression of tumorigenicity 18	-68118	St18	ENSMUST00000043578.12	intronic	intronic	0.219585	-1.2252	0.268899	0.608362	0.788297
chr1	6747700	6747886	187	*	PND_Adult_NF_peak_1930	153	7.29725	17.5188	15.3698	33	Intron (ENSMUST00000140079.7/240690, intron 3 of 23)	1	6737575	6860940	123366	1	240690	ENSMUST00000163727.3	10125	ENSMUSG00000033740	St18	suppression of tumorigenicity 18	10125	St18	ENSMUST00000163727.3	intronic	intronic	0.681502	-0.809459	4.73419	0.0386371	0.167785
chr1	6760528	6760951	424	*	PND_Adult_NF_peak_1931	506	15.4053	53.1717	50.6878	267	Intron (ENSMUST00000140079.7/240690, intron 4 of 23)	1	6737575	6860940	123366	1	240690	ENSMUST00000163727.3	22953	ENSMUSG00000033740	St18	suppression of tumorigenicity 18	22953	St18	ENSMUST00000163727.3	intronic	intronic	-0.11843	1.04792	0.599236	0.445701	0.670781
chr1	6959806	6960087	282	*	PND_Adult_NF_peak_1936	573	16.7566	59.9067	57.3822	122	Distal Intergenic	1	6857341	6859604	2264	1	240690	ENSMUST00000130338.1	102465	ENSMUSG00000033740	St18	suppression of tumorigenicity 18	30047	RP23-76C20.5	ENSMUST00000191703.1	intergenic	intergenic	2.25545	-0.812868	32.6195	6.80939e-06	0.00091431
chr1	7010924	7011100	177	*	PND_Adult_NF_peak_1939	68	4.67615	8.78853	6.82758	76	Distal Intergenic	1	7088920	7173628	84709	1	319263	ENSMUST00000061280.16	-77820	ENSMUSG00000051285	Pcmtd1	protein-L-isoaspartate (D-aspartate) O-methyltransferase domain containing 1	-2662	RP23-5K7.2	ENSMUST00000191883.1	intergenic	intergenic	-0.386567	-0.506675	1.51481	0.229187	0.467257
chr1	7011252	7011373	122	*	PND_Adult_NF_peak_1940	60	4.42496	8.00021	6.06399	80	Distal Intergenic	1	7088920	7173628	84709	1	319263	ENSMUST00000061280.16	-77547	ENSMUSG00000051285	Pcmtd1	protein-L-isoaspartate (D-aspartate) O-methyltransferase domain containing 1	-2389	RP23-5K7.2	ENSMUST00000191883.1	intergenic	intergenic	0.176194	-0.357351	0.313489	0.580413	0.770064
chr1	7011471	7011561	91	*	PND_Adult_NF_peak_1941	20	2.8744	3.75069	2.01567	44	Distal Intergenic	1	7088920	7173628	84709	1	319263	ENSMUST00000061280.16	-77359	ENSMUSG00000051285	Pcmtd1	protein-L-isoaspartate (D-aspartate) O-methyltransferase domain containing 1	-2201	RP23-5K7.2	ENSMUST00000191883.1	intergenic	intergenic	0.289194	-0.742045	0.961306	0.335698	0.57636
chr1	7013597	7013912	316	*	PND_Adult_NF_peak_1942	235	9.32811	25.7867	23.5297	80	Exon (ENSMUST00000191883.1/ENSMUST00000191883.1, exon 1 of 1)	1	7088920	7173628	84709	1	319263	ENSMUST00000061280.16	-75008	ENSMUSG00000051285	Pcmtd1	protein-L-isoaspartate (D-aspartate) O-methyltransferase domain containing 1	0	RP23-5K7.2	ENSMUST00000191883.1	exonic	TSS	-0.0867187	-0.283723	0.132971	0.718256	0.856582
chr1	7088490	7089284	795	*	PND_Adult_NF_peak_1944	5467	24.6719	550.762	546.712	317	Promoter	1	7088920	7173628	84709	1	319263	ENSMUST00000061280.16	0	ENSMUSG00000051285	Pcmtd1	protein-L-isoaspartate (D-aspartate) O-methyltransferase domain containing 1	0	Pcmtd1	ENSMUST00000061280.16	exonic	TSS	0.37172	4.96007	15.0895	0.000612868	0.0140019
chr1	7089839	7089980	142	*	PND_Adult_NF_peak_1945	104	2.79897	12.5078	10.4547	52	Promoter	1	7089166	7172122	82957	1	319263	ENSMUST00000182823.1	673	ENSMUSG00000051285	Pcmtd1	protein-L-isoaspartate (D-aspartate) O-methyltransferase domain containing 1	673	Pcmtd1	ENSMUST00000182823.1	intronic	proximal <=1000bp	0.381709	0.347236	3.66633	0.0663427	0.230325
chr1	7098322	7098686	365	*	PND_Adult_NF_peak_1946	323	8.62461	34.6663	32.3198	204	Intron (ENSMUST00000061280.16/319263, intron 1 of 5)	1	7089166	7172122	82957	1	319263	ENSMUST00000182823.1	9156	ENSMUSG00000051285	Pcmtd1	protein-L-isoaspartate (D-aspartate) O-methyltransferase domain containing 1	9156	Pcmtd1	ENSMUST00000182823.1	intronic	intronic	0.912794	0.448654	24.6503	3.48318e-05	0.00246659
chr1	7102567	7102887	321	*	PND_Adult_NF_peak_1947	1489	22.9791	151.878	148.97	73	Intron (ENSMUST00000061280.16/319263, intron 1 of 5)	1	7089166	7172122	82957	1	319263	ENSMUST00000182823.1	13401	ENSMUSG00000051285	Pcmtd1	protein-L-isoaspartate (D-aspartate) O-methyltransferase domain containing 1	13401	Pcmtd1	ENSMUST00000182823.1	intronic	intronic	0.471972	0.986777	6.12276	0.0200673	0.113379
chr1	7106133	7106305	173	*	PND_Adult_NF_peak_1948	75	4.29705	9.52567	7.54288	34	Intron (ENSMUST00000061280.16/319263, intron 1 of 5)	1	7089166	7172122	82957	1	319263	ENSMUST00000182823.1	16967	ENSMUSG00000051285	Pcmtd1	protein-L-isoaspartate (D-aspartate) O-methyltransferase domain containing 1	16967	Pcmtd1	ENSMUST00000182823.1	intronic	intronic	1.09909	-0.943568	10.0974	0.00374454	0.041843
chr1	7126001	7126321	321	*	PND_Adult_NF_peak_1950	3202	37.4687	323.716	320.295	143	Intron (ENSMUST00000061280.16/319263, intron 2 of 5)	1	7147637	7170076	22440	1	319263	ENSMUST00000182675.7	-21316	ENSMUSG00000051285	Pcmtd1	protein-L-isoaspartate (D-aspartate) O-methyltransferase domain containing 1	-10265	RP24-149G24.1	ENSMUST00000182051.1	intronic	intronic	0.14455	2.16307	1.17149	0.288817	0.531126
chr1	7177580	7178069	490	*	PND_Adult_NF_peak_1951	550	11.3341	57.5527	55.0423	281	Exon (ENSMUST00000029124.7/ENSMUST00000029124.7, exon 1 of 1)	1	7160557	7172659	12103	1	319263	ENSMUST00000183204.1	17023	ENSMUSG00000051285	Pcmtd1	protein-L-isoaspartate (D-aspartate) O-methyltransferase domain containing 1	0	RP23-278C19.3	ENSMUST00000029124.7	exonic	TSS	-0.158066	0.0709459	0.45335	0.506561	0.716547
chr1	7178516	7178787	272	*	PND_Adult_NF_peak_1952	84	4.1021	10.4878	8.48052	183	Exon (ENSMUST00000029124.7/ENSMUST00000029124.7, exon 1 of 1)	1	7160557	7172659	12103	1	319263	ENSMUST00000183204.1	17959	ENSMUSG00000051285	Pcmtd1	protein-L-isoaspartate (D-aspartate) O-methyltransferase domain containing 1	777	RP23-278C19.3	ENSMUST00000029124.7	exonic	proximal <=1000bp	0.150455	-1.0687	0.198822	0.659285	0.82092
chr1	7178883	7179030	148	*	PND_Adult_NF_peak_1953	84	4.10885	10.5066	8.49895	100	Exon (ENSMUST00000029124.7/ENSMUST00000029124.7, exon 1 of 1)	1	7160557	7172659	12103	1	319263	ENSMUST00000183204.1	18326	ENSMUSG00000051285	Pcmtd1	protein-L-isoaspartate (D-aspartate) O-methyltransferase domain containing 1	1144	RP23-278C19.3	ENSMUST00000029124.7	exonic	exonic	0.0917241	-0.508656	0.106623	0.74658	0.872892
chr1	7186904	7187005	102	*	PND_Adult_NF_peak_1954	55	4.32429	7.51705	5.59157	77	Distal Intergenic	1	7160557	7172659	12103	1	319263	ENSMUST00000183204.1	26347	ENSMUSG00000051285	Pcmtd1	protein-L-isoaspartate (D-aspartate) O-methyltransferase domain containing 1	-2914	Nras-ps2	ENSMUST00000195269.1	intergenic	intergenic	0.637384	-1.1797	2.60805	0.118132	0.321148
chr1	7206148	7206889	742	*	PND_Adult_NF_peak_1956	496	11.7368	52.1592	49.682	627	Distal Intergenic	1	7160557	7172659	12103	1	319263	ENSMUST00000183204.1	45591	ENSMUSG00000051285	Pcmtd1	protein-L-isoaspartate (D-aspartate) O-methyltransferase domain containing 1	16229	Nras-ps2	ENSMUST00000195269.1	intergenic	intergenic	0.210334	1.94867	2.84863	0.103153	0.297156
chr1	7271591	7272136	546	*	PND_Adult_NF_peak_1959	467	14.5945	49.2202	46.762	126	Distal Intergenic	1	7160557	7172659	12103	1	319263	ENSMUST00000183204.1	111034	ENSMUSG00000051285	Pcmtd1	protein-L-isoaspartate (D-aspartate) O-methyltransferase domain containing 1	5788	Gm23274	ENSMUST00000104056.1	intergenic	intergenic	0.00802923	0.672729	0.00194253	0.965175	0.984685
chr1	7293426	7293677	252	*	PND_Adult_NF_peak_1960	433	13.3034	45.7383	43.3044	158	Distal Intergenic	1	7160557	7172659	12103	1	319263	ENSMUST00000183204.1	132869	ENSMUSG00000051285	Pcmtd1	protein-L-isoaspartate (D-aspartate) O-methyltransferase domain containing 1	-21774	RP23-278C19.1	ENSMUST00000192649.1	intergenic	intergenic	0.4657	-0.0583135	4.72457	0.03882	0.16823
chr1	7319388	7319669	282	*	PND_Adult_NF_peak_1962	1802	32.7178	183.298	180.287	116	Distal Intergenic	1	7160557	7172659	12103	1	319263	ENSMUST00000183204.1	158831	ENSMUSG00000051285	Pcmtd1	protein-L-isoaspartate (D-aspartate) O-methyltransferase domain containing 1	3937	RP23-278C19.1	ENSMUST00000192649.1	intergenic	intergenic	-0.333478	0.882587	4.22689	0.0497314	0.194231
chr1	7397278	7397473	196	*	PND_Adult_NF_peak_1965	266	3.90794	28.9131	26.6216	135	Intron (ENSMUST00000181554.1/ENSMUST00000181554.1, intron 1 of 2)	1	7160557	7172659	12103	1	319263	ENSMUST00000183204.1	236721	ENSMUSG00000051285	Pcmtd1	protein-L-isoaspartate (D-aspartate) O-methyltransferase domain containing 1	-322	RP24-263A16.1	ENSMUST00000193106.5	intronic	proximal <=1000bp	1.13964	1.64423	38.0571	2.64821e-06	0.000519967
chr1	7397624	7398437	814	*	PND_Adult_NF_peak_1966	4625	20.2858	466.384	462.566	412	Exon (ENSMUST00000181554.1/ENSMUST00000181554.1, exon 1 of 3)	1	7160557	7172659	12103	1	319263	ENSMUST00000183204.1	237067	ENSMUSG00000051285	Pcmtd1	protein-L-isoaspartate (D-aspartate) O-methyltransferase domain containing 1	0	RP24-263A16.1	ENSMUST00000193106.5	exonic	TSS	0.384038	5.05508	15.5901	0.00051837	0.0126163
chr1	7414875	7415062	188	*	PND_Adult_NF_peak_1968	143	7.02698	16.5171	14.3843	71	Distal Intergenic	1	7160557	7172659	12103	1	319263	ENSMUST00000183204.1	254318	ENSMUSG00000051285	Pcmtd1	protein-L-isoaspartate (D-aspartate) O-methyltransferase domain containing 1	4196	RP24-263A16.2	ENSMUST00000193998.1	intergenic	intergenic	0.231874	-0.798217	0.488909	0.490488	0.704792
chr1	7518479	7518658	180	*	PND_Adult_NF_peak_1974	71	4.86483	9.14834	7.17275	118	Distal Intergenic	1	7160557	7172659	12103	1	319263	ENSMUST00000183204.1	357922	ENSMUSG00000051285	Pcmtd1	protein-L-isoaspartate (D-aspartate) O-methyltransferase domain containing 1	20511	RP24-181G14.2	ENSMUST00000194886.1	intergenic	intergenic	-0.330374	-0.467213	1.2227	0.27874	0.520908
chr1	7518800	7519063	264	*	PND_Adult_NF_peak_1975	249	9.72966	27.1811	24.9065	145	Distal Intergenic	1	7160557	7172659	12103	1	319263	ENSMUST00000183204.1	358243	ENSMUSG00000051285	Pcmtd1	protein-L-isoaspartate (D-aspartate) O-methyltransferase domain containing 1	20832	RP24-181G14.2	ENSMUST00000194886.1	intergenic	intergenic	0.0800125	0.253716	0.15187	0.69986	0.845554
chr1	7549934	7550112	179	*	PND_Adult_NF_peak_1976	106	5.9459	12.6794	10.6183	59	Distal Intergenic	1	7160557	7172659	12103	1	319263	ENSMUST00000183204.1	389377	ENSMUSG00000051285	Pcmtd1	protein-L-isoaspartate (D-aspartate) O-methyltransferase domain containing 1	-41534	RP24-181G14.1	ENSMUST00000195081.1	intergenic	intergenic	0.106576	0.00664426	0.17652	0.677758	0.832569
chr1	7550234	7550326	93	*	PND_Adult_NF_peak_1977	88	5.40537	10.872	8.85172	58	Distal Intergenic	1	7160557	7172659	12103	1	319263	ENSMUST00000183204.1	389677	ENSMUSG00000051285	Pcmtd1	protein-L-isoaspartate (D-aspartate) O-methyltransferase domain containing 1	-41320	RP24-181G14.1	ENSMUST00000195081.1	intergenic	intergenic	0.060514	-0.509262	0.0410613	0.840963	0.924254
chr1	7550504	7550613	110	*	PND_Adult_NF_peak_1978	134	6.75671	15.5317	13.4158	50	Distal Intergenic	1	7160557	7172659	12103	1	319263	ENSMUST00000183204.1	389947	ENSMUSG00000051285	Pcmtd1	protein-L-isoaspartate (D-aspartate) O-methyltransferase domain containing 1	-41033	RP24-181G14.1	ENSMUST00000195081.1	intergenic	intergenic	0.218585	-0.653188	0.526615	0.474375	0.693059
chr1	7777251	7777583	333	*	PND_Adult_NF_peak_1986	2016	28.3873	204.754	201.677	111	Distal Intergenic	1	7160557	7172659	12103	1	319263	ENSMUST00000183204.1	616694	ENSMUSG00000051285	Pcmtd1	protein-L-isoaspartate (D-aspartate) O-methyltransferase domain containing 1	46686	RP23-408B17.1	ENSMUST00000194872.1	intergenic	intergenic	-0.256418	1.89493	2.91817	0.0992416	0.290707
chr1	7781042	7781188	147	*	PND_Adult_NF_peak_1987	142	5.23114	16.3477	14.2211	49	Distal Intergenic	1	7160557	7172659	12103	1	319263	ENSMUST00000183204.1	620485	ENSMUSG00000051285	Pcmtd1	protein-L-isoaspartate (D-aspartate) O-methyltransferase domain containing 1	50477	RP23-408B17.1	ENSMUST00000194872.1	intergenic	intergenic	0.105835	-0.965148	0.101724	0.752263	0.875814
chr1	7915172	7915875	704	*	PND_Adult_NF_peak_1990	271	10.2702	29.4681	27.1697	373	Distal Intergenic	1	8363425	8470479	107055	2	71096	ENSMUST00000135046.3	554604	ENSMUSG00000025909	Sntg1	syntrophin, gamma 1	184607	RP23-408B17.1	ENSMUST00000194872.1	intergenic	intergenic	-0.0806123	0.746757	0.142581	0.708779	0.850921
chr1	8123028	8123342	315	*	PND_Adult_NF_peak_1997	184	8.10805	20.6158	18.4212	206	Distal Intergenic	1	8363425	8470479	107055	2	71096	ENSMUST00000135046.3	347137	ENSMUSG00000025909	Sntg1	syntrophin, gamma 1	-330149	RP23-241G23.1	ENSMUST00000192338.1	intergenic	intergenic	0.353388	-0.597414	0.93527	0.343234	0.583363
chr1	8288220	8288557	338	*	PND_Adult_NF_peak_2002	271	10.2702	29.4681	27.1697	114	Distal Intergenic	1	8363425	8470479	107055	2	71096	ENSMUST00000135046.3	181922	ENSMUSG00000025909	Sntg1	syntrophin, gamma 1	-164934	RP23-241G23.1	ENSMUST00000192338.1	intergenic	intergenic	-0.102792	0.379256	0.242202	0.62666	0.800481
chr1	8468342	8468490	149	*	PND_Adult_NF_peak_2007	60	4.12626	7.98482	6.04893	85	Exon (ENSMUST00000140995.1/ENSMUST00000140995.1, exon 1 of 1)	1	8363425	8470479	107055	2	71096	ENSMUST00000135046.3	1989	ENSMUSG00000025909	Sntg1	syntrophin, gamma 1	-335	AC102786.2	ENSMUST00000140995.1	exonic	proximal <=1000bp	0.334816	-0.524069	1.72204	0.20065	0.43364
chr1	8468707	8469029	323	*	PND_Adult_NF_peak_2008	352	10.6256	37.6167	35.2458	97	Exon (ENSMUST00000140995.1/ENSMUST00000140995.1, exon 1 of 1)	1	8363425	8470479	107055	2	71096	ENSMUST00000135046.3	1450	ENSMUSG00000025909	Sntg1	syntrophin, gamma 1	0	AC102786.2	ENSMUST00000140995.1	exonic	TSS	0.220075	0.888442	1.78189	0.193239	0.424624
chr1	8470508	8470621	114	*	PND_Adult_NF_peak_2010	148	6.40079	16.9702	14.8318	51	Promoter	1	8363183	8470520	107338	2	71096	ENSMUST00000115484.8	0	ENSMUSG00000025909	Sntg1	syntrophin, gamma 1	0	Sntg1	ENSMUST00000115484.8	exonic	TSS	1.51329	-0.989149	20.2736	0.00011953	0.00518066
chr1	8489937	8490175	239	*	PND_Adult_NF_peak_2012	573	16.7566	59.9067	57.3822	79	Intron (ENSMUST00000132064.7/71096, intron 14 of 19)	1	8363183	8470520	107338	2	71096	ENSMUST00000115484.8	-19417	ENSMUSG00000025909	Sntg1	syntrophin, gamma 1	19417	Sntg1	ENSMUST00000115484.8	intronic	intronic	-0.749449	-0.951249	4.11001	0.0527667	0.201068
chr1	8490280	8490524	245	*	PND_Adult_NF_peak_2013	260	9.99993	28.3188	26.0322	54	Intron (ENSMUST00000132064.7/71096, intron 14 of 19)	1	8363183	8470520	107338	2	71096	ENSMUST00000115484.8	-19760	ENSMUSG00000025909	Sntg1	syntrophin, gamma 1	19760	Sntg1	ENSMUST00000115484.8	intronic	intronic	0.573786	-0.957506	2.64997	0.115349	0.316872
chr1	8564214	8564676	463	*	PND_Adult_NF_peak_2015	583	16.8409	60.8815	58.3519	303	Intron (ENSMUST00000132064.7/71096, intron 13 of 19)	1	8363183	8470520	107338	2	71096	ENSMUST00000115484.8	-93694	ENSMUSG00000025909	Sntg1	syntrophin, gamma 1	-24048	Gm23358	ENSMUST00000103887.2	intronic	intronic	0.257201	0.564914	1.34699	0.256257	0.497025
chr1	8805575	8805778	204	*	PND_Adult_NF_peak_2020	3696	54.3749	373.212	369.654	115	Intron (ENSMUST00000132064.7/71096, intron 3 of 19)	1	8363475	8803943	440469	2	71096	ENSMUST00000115488.2	-1632	ENSMUSG00000025909	Sntg1	syntrophin, gamma 1	1632	Sntg1	ENSMUST00000115488.2	intronic	intronic	0.194443	1.31814	1.76949	0.194747	0.426418
chr1	8822185	8822518	334	*	PND_Adult_NF_peak_2022	1178	27.7836	120.61	117.812	186	Intron (ENSMUST00000132064.7/71096, intron 3 of 19)	1	8363475	8803943	440469	2	71096	ENSMUST00000115488.2	-18242	ENSMUSG00000025909	Sntg1	syntrophin, gamma 1	6047	Gm24276	ENSMUST00000102181.1	intronic	intronic	0.519081	0.530781	7.29727	0.0118695	0.0830174
chr1	8855409	8855678	270	*	PND_Adult_NF_peak_2024	213	6.14206	23.5579	21.3272	161	Intron (ENSMUST00000132064.7/71096, intron 3 of 19)	1	8363475	8803943	440469	2	71096	ENSMUST00000115488.2	-51466	ENSMUSG00000025909	Sntg1	syntrophin, gamma 1	-589	AC118192.1	ENSMUST00000151704.1	intronic	proximal <=1000bp	-0.454083	-0.109166	3.46432	0.0738005	0.244976
chr1	8859281	8859556	276	*	PND_Adult_NF_peak_2026	1871	24.1399	190.143	187.111	158	Intron (ENSMUST00000132064.7/71096, intron 3 of 19)	1	8363475	8803943	440469	2	71096	ENSMUST00000115488.2	-55338	ENSMUSG00000025909	Sntg1	syntrophin, gamma 1	2518	RP23-200C17.1	ENSMUST00000192115.1	intronic	intronic	0.28805	1.62491	4.34999	0.0467445	0.187367
chr1	8860186	8860312	127	*	PND_Adult_NF_peak_2027	119	4.59633	14.0814	11.9946	50	Intron (ENSMUST00000132064.7/71096, intron 3 of 19)	1	8363475	8803943	440469	2	71096	ENSMUST00000115488.2	-56243	ENSMUSG00000025909	Sntg1	syntrophin, gamma 1	3423	RP23-200C17.1	ENSMUST00000192115.1	intronic	intronic	0.107977	-0.621666	0.104648	0.748866	0.874138
chr1	8925049	8925301	253	*	PND_Adult_NF_peak_2028	506	15.4053	53.1717	50.6878	97	Intron (ENSMUST00000132064.7/71096, intron 3 of 19)	1	8363475	8803943	440469	2	71096	ENSMUST00000115488.2	-121106	ENSMUSG00000025909	Sntg1	syntrophin, gamma 1	-27121	Sntg1	ENSMUST00000194098.1	intronic	intronic	1.75176	0.0592356	9.07592	0.0127827	0.0866778
chr1	8925482	8925912	431	*	PND_Adult_NF_peak_2029	153	7.29725	17.5188	15.3698	312	Intron (ENSMUST00000132064.7/71096, intron 3 of 19)	1	8363475	8803943	440469	2	71096	ENSMUST00000115488.2	-121539	ENSMUSG00000025909	Sntg1	syntrophin, gamma 1	-26510	Sntg1	ENSMUST00000194098.1	intronic	intronic	0.179336	0.470471	0.753689	0.393082	0.627306
chr1	8936447	8936784	338	*	PND_Adult_NF_peak_2030	146	6.92011	16.7583	14.6226	281	Intron (ENSMUST00000132064.7/71096, intron 3 of 19)	1	8363475	8803943	440469	2	71096	ENSMUST00000115488.2	-132504	ENSMUSG00000025909	Sntg1	syntrophin, gamma 1	-15638	Sntg1	ENSMUST00000194098.1	intronic	intronic	0.201401	0.193112	0.787035	0.382955	0.618712
chr1	8936975	8937063	89	*	PND_Adult_NF_peak_2031	74	4.83726	9.42407	7.44322	32	Intron (ENSMUST00000132064.7/71096, intron 3 of 19)	1	8363475	8803943	440469	2	71096	ENSMUST00000115488.2	-133032	ENSMUSG00000025909	Sntg1	syntrophin, gamma 1	-15359	Sntg1	ENSMUST00000194098.1	intronic	intronic	-0.175494	-0.551649	0.26416	0.611623	0.790648
chr1	8938989	8939103	115	*	PND_Adult_NF_peak_2034	181	7.98756	20.3726	18.1838	64	Intron (ENSMUST00000132064.7/71096, intron 3 of 19)	1	8363475	8803943	440469	2	71096	ENSMUST00000115488.2	-135046	ENSMUSG00000025909	Sntg1	syntrophin, gamma 1	-13319	Sntg1	ENSMUST00000194098.1	intronic	intronic	-0.137912	-1.15083	0.148376	0.703157	0.847647
chr1	8963502	8963643	142	*	PND_Adult_NF_peak_2036	194	8.37832	21.6771	19.4682	77	Exon (ENSMUST00000085919.2/ENSMUST00000085919.2, exon 1 of 1)	1	8363475	8803943	440469	2	71096	ENSMUST00000115488.2	-159559	ENSMUSG00000025909	Sntg1	syntrophin, gamma 1	0	AC122738.1	ENSMUST00000085919.2	exonic	TSS	-0.117852	-0.495191	0.178233	0.676292	0.831751
chr1	9150542	9150735	194	*	PND_Adult_NF_peak_2038	406	11.5324	43.0168	40.6024	115	Intron (ENSMUST00000132064.7/71096, intron 2 of 19)	1	8950572	9298236	347665	2	71096	ENSMUST00000126083.1	147501	ENSMUSG00000025909	Sntg1	syntrophin, gamma 1	-41381	RP23-331M15.1	ENSMUST00000193635.1	intronic	intronic	0.965342	-0.701245	12.1715	0.00170738	0.0261853
chr1	9151406	9151631	226	*	PND_Adult_NF_peak_2039	1923	34.0561	195.392	192.343	111	Intron (ENSMUST00000132064.7/71096, intron 2 of 19)	1	8950572	9298236	347665	2	71096	ENSMUST00000126083.1	146605	ENSMUSG00000025909	Sntg1	syntrophin, gamma 1	-40485	RP23-331M15.1	ENSMUST00000193635.1	intronic	intronic	0.23509	0.884027	1.50274	0.231001	0.469234
chr1	9163755	9163987	233	*	PND_Adult_NF_peak_2040	260	9.99993	28.3188	26.0322	106	Intron (ENSMUST00000132064.7/71096, intron 2 of 19)	1	8950572	9298236	347665	2	71096	ENSMUST00000126083.1	134249	ENSMUSG00000025909	Sntg1	syntrophin, gamma 1	-28129	RP23-331M15.1	ENSMUST00000193635.1	intronic	intronic	0.00693702	-0.977231	0.000437955	0.98346	0.992764
chr1	9224519	9224857	339	*	PND_Adult_NF_peak_2043	1204	25.0557	123.271	120.464	209	Intron (ENSMUST00000132064.7/71096, intron 1 of 19)	1	8950572	9298236	347665	2	71096	ENSMUST00000126083.1	73379	ENSMUSG00000025909	Sntg1	syntrophin, gamma 1	32403	RP23-331M15.1	ENSMUST00000193635.1	intronic	intronic	-0.170715	1.03085	0.548992	0.466803	0.687237
chr1	9225062	9225196	135	*	PND_Adult_NF_peak_2044	35	3.32508	5.35389	3.51493	87	Intron (ENSMUST00000132064.7/71096, intron 1 of 19)	1	8950572	9298236	347665	2	71096	ENSMUST00000126083.1	73040	ENSMUSG00000025909	Sntg1	syntrophin, gamma 1	32946	RP23-331M15.1	ENSMUST00000193635.1	intronic	intronic	0.60547	-1.35217	1.70769	0.202739	0.436097
chr1	9298472	9298923	452	*	PND_Adult_NF_peak_2046	4079	36.0744	411.592	407.927	129	Promoter	1	8361475	9298573	937099	2	71096	ENSMUST00000132064.7	0	ENSMUSG00000025909	Sntg1	syntrophin, gamma 1	0	Sntg1	ENSMUST00000132064.7	exonic	TSS	-0.156999	2.74932	1.88864	0.180833	0.408657
chr1	9299322	9299424	103	*	PND_Adult_NF_peak_2047	34	2.57103	5.28801	3.45092	79	Promoter	1	8675973	9299282	623310	2	71096	ENSMUST00000144593.7	-40	ENSMUSG00000025909	Sntg1	syntrophin, gamma 1	40	Sntg1	ENSMUST00000144593.7	exonic	proximal <=1000bp	0.239941	0.0305378	1.14573	0.294069	0.536332
chr1	9299588	9300088	501	*	PND_Adult_NF_peak_2048	657	10.2881	68.286	65.7155	330	Promoter	1	8362678	9299878	937201	2	71096	ENSMUST00000140302.7	0	ENSMUSG00000025909	Sntg1	syntrophin, gamma 1	0	Sntg1	ENSMUST00000140302.7	exonic	TSS	-0.0177863	1.97816	0.0164647	0.898866	0.95339
chr1	9313173	9313473	301	*	PND_Adult_NF_peak_2049	127	6.41981	14.8584	12.756	49	Distal Intergenic	1	8362678	9299878	937201	2	71096	ENSMUST00000140302.7	-13295	ENSMUSG00000025909	Sntg1	syntrophin, gamma 1	13295	Sntg1	ENSMUST00000140302.7	intergenic	intergenic	0.340604	-0.956209	1.04267	0.316407	0.558071
chr1	9313685	9313857	173	*	PND_Adult_NF_peak_2050	145	6.88055	16.6774	14.5426	76	Distal Intergenic	1	8362678	9299878	937201	2	71096	ENSMUST00000140302.7	-13807	ENSMUSG00000025909	Sntg1	syntrophin, gamma 1	13807	Sntg1	ENSMUST00000140302.7	intergenic	intergenic	1.01483	-0.560149	3.32558	0.092166	0.278599
chr1	9314019	9314497	479	*	PND_Adult_NF_peak_2051	58	4.31165	7.78348	5.85212	306	Distal Intergenic	1	8362678	9299878	937201	2	71096	ENSMUST00000140302.7	-14141	ENSMUSG00000025909	Sntg1	syntrophin, gamma 1	14141	Sntg1	ENSMUST00000140302.7	intergenic	intergenic	0.234904	0.253294	1.32324	0.260255	0.501228
chr1	9356815	9356931	117	*	PND_Adult_NF_peak_2052	63	4.59456	8.32052	6.36926	77	Distal Intergenic	1	8362678	9299878	937201	2	71096	ENSMUST00000140302.7	-56937	ENSMUSG00000025909	Sntg1	syntrophin, gamma 1	-41756	RP23-411P10.5	ENSMUST00000040649.6	intergenic	intergenic	0.0522964	-0.908206	0.027378	0.869832	0.938963
chr1	9357028	9357170	143	*	PND_Adult_NF_peak_2053	173	7.83778	19.5687	17.3886	85	Distal Intergenic	1	8362678	9299878	937201	2	71096	ENSMUST00000140302.7	-57150	ENSMUSG00000025909	Sntg1	syntrophin, gamma 1	-41517	RP23-411P10.5	ENSMUST00000040649.6	intergenic	intergenic	-0.110241	-0.528666	0.161557	0.690941	0.840569
chr1	9468799	9469210	412	*	PND_Adult_NF_peak_2057	118	5.7971	13.9622	11.8771	193	Distal Intergenic	1	9545408	9547455	2048	1	59014	ENSMUST00000072079.8	-76198	ENSMUSG00000061024	Rrs1	ribosome biogenesis regulator 1	10129	Gm24765	ENSMUST00000083691.1	intergenic	intergenic	0.135719	-0.0977035	0.256777	0.616521	0.79378
chr1	9469598	9469898	301	*	PND_Adult_NF_peak_2058	265	9.17218	28.8404	26.5495	234	Distal Intergenic	1	9545408	9547455	2048	1	59014	ENSMUST00000072079.8	-75510	ENSMUSG00000061024	Rrs1	ribosome biogenesis regulator 1	10928	Gm24765	ENSMUST00000083691.1	intergenic	intergenic	0.31922	0.587736	3.0928	0.0901492	0.27514
chr1	9470005	9470249	245	*	PND_Adult_NF_peak_2059	263	9.10364	28.6827	26.3932	112	Distal Intergenic	1	9545408	9547455	2048	1	59014	ENSMUST00000072079.8	-75159	ENSMUSG00000061024	Rrs1	ribosome biogenesis regulator 1	11335	Gm24765	ENSMUST00000083691.1	intergenic	intergenic	0.333541	0.581143	3.19278	0.085375	0.266519
chr1	9515640	9515731	92	*	PND_Adult_NF_peak_2062	63	4.59456	8.32052	6.36926	41	Distal Intergenic	1	9545408	9547455	2048	1	59014	ENSMUST00000072079.8	-29677	ENSMUSG00000061024	Rrs1	ribosome biogenesis regulator 1	14118	RP24-361E12.1	ENSMUST00000192792.1	intergenic	intergenic	0.103978	-1.17541	0.0995152	0.754876	0.877353
chr1	9516747	9516995	249	*	PND_Adult_NF_peak_2063	41	3.78376	5.98892	4.12049	64	Distal Intergenic	1	9545408	9547455	2048	1	59014	ENSMUST00000072079.8	-28413	ENSMUSG00000061024	Rrs1	ribosome biogenesis regulator 1	15225	RP24-361E12.1	ENSMUST00000192792.1	intergenic	intergenic	-0.677621	-1.28196	2.30472	0.140787	0.354959
chr1	9545119	9545815	697	*	PND_Adult_NF_peak_2065	8869	33.6498	891.965	886.909	182	Promoter	1	9545408	9547455	2048	1	59014	ENSMUST00000072079.8	0	ENSMUSG00000061024	Rrs1	ribosome biogenesis regulator 1	0	Rrs1	ENSMUST00000072079.8	exonic	TSS	0.44629	5.1039	20.6369	0.0001074	0.00488568
chr1	9546044	9546136	93	*	PND_Adult_NF_peak_2066	41	2.08319	6.03301	4.16341	44	Promoter	1	9545408	9547455	2048	1	59014	ENSMUST00000072079.8	636	ENSMUSG00000061024	Rrs1	ribosome biogenesis regulator 1	636	Rrs1	ENSMUST00000072079.8	exonic	proximal <=1000bp	0.0549018	-0.148923	0.0543802	0.817396	0.912032
chr1	9547978	9548128	151	*	PND_Adult_NF_peak_2067	211	3.64791	23.3977	21.1686	73	Promoter	1	9548055	9576901	28847	1	76187	ENSMUST00000027044.14	0	ENSMUSG00000025911	Adhfe1	alcohol dehydrogenase, iron containing, 1	0	Adhfe1	ENSMUST00000027044.14	exonic	TSS	0.202517	0.569478	0.892146	0.353404	0.592834
chr1	9570717	9571097	381	*	PND_Adult_NF_peak_2068	850	18.7682	87.669	85.0049	111	Intron (ENSMUST00000144177.7/76187, intron 13 of 13)	1	9548119	9580673	32555	1	76187	ENSMUST00000190654.1	22598	ENSMUSG00000025911	Adhfe1	alcohol dehydrogenase, iron containing, 1	-3451	AC103620.1	ENSMUST00000121942.1	intronic	intronic	-0.0112324	0.491123	0.00274593	0.958601	0.981688
chr1	9573348	9573505	158	*	PND_Adult_NF_peak_2069	531	13.8463	55.6055	53.1072	55	Intron (ENSMUST00000144177.7/76187, intron 13 of 13)	1	9548119	9580673	32555	1	76187	ENSMUST00000190654.1	25229	ENSMUSG00000025911	Adhfe1	alcohol dehydrogenase, iron containing, 1	-1043	AC103620.1	ENSMUST00000121942.1	intronic	intronic	-0.35516	-0.545103	1.33957	0.257405	0.498329
chr1	9601136	9601273	138	*	PND_Adult_NF_peak_2071	34	3.29503	5.2945	3.45719	32	Promoter	1	9601199	9627143	25945	1	76982	ENSMUST00000088666.3	0	ENSMUSG00000067879	Vxn	vexin	0	AC103620.3	ENSMUST00000088666.3	exonic	TSS	0.629866	-0.832685	5.30558	0.0293207	0.142244
chr1	9601445	9601688	244	*	PND_Adult_NF_peak_2072	218	8.04188	24.0722	21.8338	151	Promoter	1	9601199	9627143	25945	1	76982	ENSMUST00000088666.3	246	ENSMUSG00000067879	Vxn	vexin	246	AC103620.3	ENSMUST00000088666.3	exonic	proximal <=1000bp	0.396434	0.739375	3.96693	0.0567693	0.210164
chr1	9601869	9602213	345	*	PND_Adult_NF_peak_2073	218	8.02883	24.042	21.8039	55	Promoter	1	9601199	9627143	25945	1	76982	ENSMUST00000088666.3	670	ENSMUSG00000067879	Vxn	vexin	670	AC103620.3	ENSMUST00000088666.3	exonic	proximal <=1000bp	0.10857	0.843191	0.32525	0.573259	0.765106
chr1	9609831	9610397	567	*	PND_Adult_NF_peak_2074	113	5.70737	13.3747	11.3031	263	Intron (ENSMUST00000088666.3/76982, intron 2 of 5)	1	9601199	9627143	25945	1	76982	ENSMUST00000088666.3	8632	ENSMUSG00000067879	Vxn	vexin	8632	AC103620.3	ENSMUST00000088666.3	intronic	intronic	0.230373	0.855201	1.76955	0.194739	0.426414
chr1	9610538	9610779	242	*	PND_Adult_NF_peak_2075	303	10.1054	32.7222	30.394	70	Intron (ENSMUST00000088666.3/76982, intron 2 of 5)	1	9601199	9627143	25945	1	76982	ENSMUST00000088666.3	9339	ENSMUSG00000067879	Vxn	vexin	9339	AC103620.3	ENSMUST00000088666.3	intronic	intronic	0.947649	0.113235	10.1831	0.00437915	0.0459167
chr1	9636475	9636769	295	*	PND_Adult_NF_peak_2078	937	20.5645	96.4965	93.794	215	Distal Intergenic	1	9601018	9631175	30158	2	72481	ENSMUST00000153239.7	-5300	ENSMUSG00000079671	2610203C22Rik	RIKEN cDNA 2610203C22 gene	-3813	RP24-219C22.3	ENSMUST00000191209.1	intergenic	intergenic	0.329275	0.505745	2.93791	0.0981628	0.288893
chr1	9648559	9649096	538	*	PND_Adult_NF_peak_2079	100	5.28073	12.076	10.0298	102	Distal Intergenic	1	9601018	9631175	30158	2	72481	ENSMUST00000153239.7	-17384	ENSMUSG00000079671	2610203C22Rik	RIKEN cDNA 2610203C22 gene	7977	RP24-219C22.3	ENSMUST00000191209.1	intergenic	intergenic	0.39615	1.0577	4.53717	0.042613	0.177586
chr1	9649312	9649645	334	*	PND_Adult_NF_peak_2080	466	12.9498	49.1528	46.6961	104	Distal Intergenic	1	9601018	9631175	30158	2	72481	ENSMUST00000153239.7	-18137	ENSMUSG00000079671	2610203C22Rik	RIKEN cDNA 2610203C22 gene	8730	RP24-219C22.3	ENSMUST00000191209.1	intergenic	intergenic	-0.131699	0.966579	0.695246	0.411817	0.64309
chr1	9658507	9658690	184	*	PND_Adult_NF_peak_2081	297	10.3386	32.0307	29.7078	94	Distal Intergenic	1	9676132	9678610	2479	2	17864	ENSMUST00000160022.1	19920	ENSMUSG00000025912	Mybl1	myeloblastosis oncogene-like 1	17925	RP24-219C22.3	ENSMUST00000191209.1	intergenic	intergenic	0.0867926	0.284764	0.171703	0.681928	0.835226
chr1	9659021	9659348	328	*	PND_Adult_NF_peak_2082	310	10.6632	33.3495	31.0146	207	Distal Intergenic	1	9676132	9678610	2479	2	17864	ENSMUST00000160022.1	19262	ENSMUSG00000025912	Mybl1	myeloblastosis oncogene-like 1	18439	RP24-219C22.3	ENSMUST00000191209.1	intergenic	intergenic	0.402668	0.531521	5.75439	0.0237403	0.125168
chr1	9682883	9683200	318	*	PND_Adult_NF_peak_2084	1225	28.5928	125.376	122.561	177	Promoter	1	9678272	9683452	5181	2	17864	ENSMUST00000160451.1	252	ENSMUSG00000025912	Mybl1	myeloblastosis oncogene-like 1	-252	Mybl1	ENSMUST00000160451.1	exonic	proximal <=1000bp	0.556899	0.528898	8.7313	0.00647681	0.0580423
chr1	9699220	9699529	310	*	PND_Adult_NF_peak_2086	3050	18.1996	308.4	305.022	125	Promoter	1	9681863	9699654	17792	2	17864	ENSMUST00000188212.1	125	ENSMUSG00000025912	Mybl1	myeloblastosis oncogene-like 1	-125	Mybl1	ENSMUST00000188212.1	intronic	proximal <=1000bp	0.380983	2.88772	12.4896	0.00152042	0.0245071
chr1	9700127	9700854	728	*	PND_Adult_NF_peak_2087	1166	9.77074	119.432	116.639	282	Promoter	1	9667415	9700209	32795	2	17864	ENSMUST00000088658.10	0	ENSMUSG00000025912	Mybl1	myeloblastosis oncogene-like 1	0	Mybl1	ENSMUST00000088658.10	exonic	TSS	0.3565	3.43281	3.03322	0.10527	0.30063
chr1	9702660	9702904	245	*	PND_Adult_NF_peak_2088	667	7.06015	69.3359	66.7605	107	Distal Intergenic	1	9667415	9700209	32795	2	17864	ENSMUST00000088658.10	-2451	ENSMUSG00000025912	Mybl1	myeloblastosis oncogene-like 1	2451	Mybl1	ENSMUST00000088658.10	intergenic	intergenic	0.345527	1.67013	5.72156	0.0241059	0.126412
chr1	9716690	9716823	134	*	PND_Adult_NF_peak_2089	28	3.09315	4.6956	2.89042	51	Downstream (1-2kb)	1	9667415	9700209	32795	2	17864	ENSMUST00000088658.10	-16481	ENSMUSG00000025912	Mybl1	myeloblastosis oncogene-like 1	16481	Mybl1	ENSMUST00000088658.10	intergenic	intergenic	0.367743	-0.128082	2.30763	0.140546	0.354679
chr1	9716948	9717242	295	*	PND_Adult_NF_peak_2090	783	18.46	80.9774	78.3442	94	Downstream (1-2kb)	1	9667415	9700209	32795	2	17864	ENSMUST00000088658.10	-16739	ENSMUSG00000025912	Mybl1	myeloblastosis oncogene-like 1	16739	Mybl1	ENSMUST00000088658.10	intergenic	intergenic	0.1777	0.758306	0.888448	0.354387	0.593612
chr1	9747866	9747995	130	*	PND_Adult_NF_peak_2092	330	4.36379	35.4531	33.0992	57	Promoter	1	9747956	9791318	43363	1	73331	ENSMUST00000181358.7	0		1700034P13Rik	RIKEN cDNA 1700034P13 gene	0	RP23-228O9.1	ENSMUST00000181358.7	exonic	TSS	0.398322	1.75938	7.76754	0.00969466	0.0737788
chr1	9748228	9748725	498	*	PND_Adult_NF_peak_2093	11217	38.8083	1127.35	1121.73	232	Promoter	1	9718622	9748382	29761	2	70675	ENSMUST00000057438.6	0	ENSMUSG00000045210	Vcpip1	valosin containing protein (p97)/p47 complex interacting protein 1	0	Vcpip1	ENSMUST00000057438.6	exonic	TSS	0.343911	5.0039	17.4534	0.000283259	0.00870678
chr1	9768402	9769305	904	*	PND_Adult_NF_peak_2096	1243	14.8023	127.187	124.365	512	Intron (ENSMUST00000181821.7/73331, intron 2 of 3)	1	9748626	9770751	22126	1	73331	ENSMUST00000209020.1	19776		1700034P13Rik	RIKEN cDNA 1700034P13 gene	-14473	RP23-228O9.1	ENSMUST00000189322.1	intronic	intronic	0.315723	3.00488	5.7906	0.023455	0.124267
chr1	9769687	9769843	157	*	PND_Adult_NF_peak_2097	107	3.80087	12.7813	10.7188	102	Intron (ENSMUST00000181821.7/73331, intron 2 of 3)	1	9748626	9770751	22126	1	73331	ENSMUST00000209020.1	21061		1700034P13Rik	RIKEN cDNA 1700034P13 gene	-13935	RP23-228O9.1	ENSMUST00000189322.1	intronic	intronic	0.33654	-0.386953	1.51469	0.229204	0.467274
chr1	9772871	9773001	131	*	PND_Adult_NF_peak_2098	678	10.0866	70.4665	67.8851	63	Intron (ENSMUST00000181821.7/73331, intron 2 of 3)	1	9748626	9770751	22126	1	73331	ENSMUST00000209020.1	24245		1700034P13Rik	RIKEN cDNA 1700034P13 gene	-10777	RP23-228O9.1	ENSMUST00000189322.1	intronic	intronic	-0.0684344	0.168858	0.105641	0.747707	0.873503
chr1	9785118	9785325	208	*	PND_Adult_NF_peak_2099	87	3.59945	10.759	8.74675	49	Intron (ENSMUST00000181821.7/73331, intron 2 of 3)	1	9798107	9900843	102737	1	170755	ENSMUST00000166384.7	-12782	ENSMUSG00000025915	Sgk3	serum/glucocorticoid regulated kinase 3	1340	RP23-228O9.1	ENSMUST00000189322.1	intronic	intronic	0.0688024	-0.774888	0.0454221	0.832856	0.92034
chr1	9787605	9787783	179	*	PND_Adult_NF_peak_2100	147	4.5548	16.8422	14.7054	91	Intron (ENSMUST00000181821.7/73331, intron 2 of 3)	1	9798107	9900843	102737	1	170755	ENSMUST00000166384.7	-10324	ENSMUSG00000025915	Sgk3	serum/glucocorticoid regulated kinase 3	3827	RP23-228O9.1	ENSMUST00000189322.1	intronic	intronic	-0.0174319	0.54516	0.00647425	0.936472	0.971715
chr1	9787917	9788402	486	*	PND_Adult_NF_peak_2101	3518	32.2602	355.393	351.883	179	Intron (ENSMUST00000181821.7/73331, intron 2 of 3)	1	9798107	9900843	102737	1	170755	ENSMUST00000166384.7	-9705	ENSMUSG00000025915	Sgk3	serum/glucocorticoid regulated kinase 3	4139	RP23-228O9.1	ENSMUST00000189322.1	intronic	intronic	0.261183	2.58244	2.77886	0.109059	0.307021
chr1	9788911	9789060	150	*	PND_Adult_NF_peak_2102	321	6.81637	34.4957	32.1505	67	Intron (ENSMUST00000181821.7/73331, intron 2 of 3)	1	9798107	9900843	102737	1	170755	ENSMUST00000166384.7	-9047	ENSMUSG00000025915	Sgk3	serum/glucocorticoid regulated kinase 3	5133	RP23-228O9.1	ENSMUST00000189322.1	intronic	intronic	1.07328	-0.483492	13.9155	0.000916077	0.017911
chr1	9795154	9795460	307	*	PND_Adult_NF_peak_2103	150	4.7432	17.2111	15.0697	258	Distal Intergenic	1	9798107	9900843	102737	1	170755	ENSMUST00000166384.7	-2647	ENSMUSG00000025915	Sgk3	serum/glucocorticoid regulated kinase 3	-2647	Sgk3	ENSMUST00000166384.7	intergenic	intergenic	0.657127	0.54461	14.0087	0.000886881	0.0175432
chr1	9795594	9795672	79	*	PND_Adult_NF_peak_2104	66	3.31058	8.60261	6.64552	34	Distal Intergenic	1	9798107	9900843	102737	1	170755	ENSMUST00000166384.7	-2435	ENSMUSG00000025915	Sgk3	serum/glucocorticoid regulated kinase 3	-2435	Sgk3	ENSMUST00000166384.7	intergenic	intergenic	0.497446	-0.56639	2.93449	0.0983485	0.289236
chr1	9797801	9798633	833	*	PND_Adult_NF_peak_2105	462	8.68917	48.6841	46.2302	143	Promoter	1	9798107	9900843	102737	1	170755	ENSMUST00000166384.7	0	ENSMUSG00000025915	Sgk3	serum/glucocorticoid regulated kinase 3	0	Sgk3	ENSMUST00000166384.7	exonic	TSS	0.192407	2.90416	3.1481	0.087472	0.270337
chr1	9799176	9799272	97	*	PND_Adult_NF_peak_2106	105	3.97959	12.6352	10.58	36	Promoter	1	9798208	9900008	101801	1	170755	ENSMUST00000188298.6	968	ENSMUSG00000025915	Sgk3	serum/glucocorticoid regulated kinase 3	968	Sgk3	ENSMUST00000188298.6	intronic	proximal <=1000bp	0.162778	-0.0445663	0.456907	0.504912	0.715297
chr1	9806036	9806158	123	*	PND_Adult_NF_peak_2107	81	4.18508	10.1338	8.13291	63	Intron (ENSMUST00000166384.7/170755, intron 1 of 16)	1	9798208	9900008	101801	1	170755	ENSMUST00000188298.6	7828	ENSMUSG00000025915	Sgk3	serum/glucocorticoid regulated kinase 3	3483	RP23-228O9.3	ENSMUST00000063059.4	intronic	intronic	0.0429239	-1.29392	0.0148563	0.903906	0.955872
chr1	9806701	9807118	418	*	PND_Adult_NF_peak_2108	1742	26.4121	177.216	174.224	334	Intron (ENSMUST00000166384.7/170755, intron 1 of 16)	1	9798208	9900008	101801	1	170755	ENSMUST00000188298.6	8493	ENSMUSG00000025915	Sgk3	serum/glucocorticoid regulated kinase 3	4148	RP23-228O9.3	ENSMUST00000063059.4	intronic	intronic	0.33009	1.70962	6.42103	0.0174933	0.104583
chr1	9807406	9807592	187	*	PND_Adult_NF_peak_2109	95	4.52335	11.6283	9.59508	43	Intron (ENSMUST00000166384.7/170755, intron 1 of 16)	1	9798208	9900008	101801	1	170755	ENSMUST00000188298.6	9198	ENSMUSG00000025915	Sgk3	serum/glucocorticoid regulated kinase 3	4853	RP23-228O9.3	ENSMUST00000063059.4	intronic	intronic	0.397065	-0.0395828	2.93355	0.0983999	0.289293
chr1	9814451	9814744	294	*	PND_Adult_NF_peak_2110	366	12.4323	39.0446	36.6607	204	Intron (ENSMUST00000166384.7/170755, intron 1 of 16)	1	9798208	9900008	101801	1	170755	ENSMUST00000188298.6	16243	ENSMUSG00000025915	Sgk3	serum/glucocorticoid regulated kinase 3	11898	RP23-228O9.3	ENSMUST00000063059.4	intronic	intronic	0.246669	-0.315064	0.838984	0.367923	0.605774
chr1	9825700	9826085	386	*	PND_Adult_NF_peak_2111	1223	24.2658	125.164	122.349	150	Intron (ENSMUST00000166384.7/170755, intron 1 of 16)	1	9848272	9900843	52572	1	170755	ENSMUST00000171265.7	-22187	ENSMUSG00000025915	Sgk3	serum/glucocorticoid regulated kinase 3	-8517	Gm22607	ENSMUST00000158291.1	intronic	intronic	-0.0187367	0.142397	0.00545394	0.941685	0.974013
chr1	9847729	9848708	980	*	PND_Adult_NF_peak_2112	1266	12.9849	129.48	126.65	663	Promoter	1	9848272	9900843	52572	1	170755	ENSMUST00000171265.7	0	ENSMUSG00000025915	Sgk3	serum/glucocorticoid regulated kinase 3	0	Sgk3	ENSMUST00000171265.7	exonic	TSS	0.332263	3.71576	7.69501	0.0100988	0.0755418
chr1	9853150	9853277	128	*	PND_Adult_NF_peak_2113	202	4.29095	22.4626	20.2457	73	Intron (ENSMUST00000166384.7/170755, intron 1 of 16)	1	9848397	9899853	51457	1	170755	ENSMUST00000097826.5	4753	ENSMUSG00000025915	Sgk3	serum/glucocorticoid regulated kinase 3	4753	Sgk3	ENSMUST00000097826.5	intronic	intronic	0.369659	1.29084	6.14595	0.0198198	0.112581
chr1	9853367	9854024	658	*	PND_Adult_NF_peak_2114	2760	23.5073	279.342	276.046	175	Intron (ENSMUST00000166384.7/170755, intron 1 of 16)	1	9848397	9899853	51457	1	170755	ENSMUST00000097826.5	4970	ENSMUSG00000025915	Sgk3	serum/glucocorticoid regulated kinase 3	4970	Sgk3	ENSMUST00000097826.5	intronic	intronic	0.0507524	3.03974	0.235806	0.63123	0.803392
chr1	9907081	9907358	278	*	PND_Adult_NF_peak_2119	949	10.1263	97.6716	94.9641	218	Distal Intergenic	1	9908638	9922525	13888	1	240697	ENSMUST00000052843.11	-1280	ENSMUSG00000046101	Mcmdc2	minichromosome maintenance domain containing 2	-1280	Mcmdc2	ENSMUST00000052843.11	intergenic	intergenic	0.123944	1.64931	0.547121	0.466073	0.686812
chr1	9907929	9908006	78	*	PND_Adult_NF_peak_2120	36	2.30637	5.53274	3.68866	24	Promoter	1	9908638	9922525	13888	1	240697	ENSMUST00000052843.11	-632	ENSMUSG00000046101	Mcmdc2	minichromosome maintenance domain containing 2	-632	Mcmdc2	ENSMUST00000052843.11	intergenic	proximal <=1000bp	0.965097	-0.523497	8.89572	0.00616804	0.0564235
chr1	9908547	9908841	295	*	PND_Adult_NF_peak_2121	2175	17.6225	220.689	217.564	81	Promoter	1	9908638	9922525	13888	1	240697	ENSMUST00000052843.11	0	ENSMUSG00000046101	Mcmdc2	minichromosome maintenance domain containing 2	0	Mcmdc2	ENSMUST00000052843.11	exonic	TSS	0.453663	2.61627	12.2029	0.00168784	0.0260039
chr1	9909162	9909518	357	*	PND_Adult_NF_peak_2122	1321	12.8415	135.02	132.17	161	Promoter	1	9908670	9942085	33416	1	240697	ENSMUST00000140948.8	492	ENSMUSG00000046101	Mcmdc2	minichromosome maintenance domain containing 2	492	Mcmdc2	ENSMUST00000140948.8	intronic	proximal <=1000bp	-0.0355294	2.22089	0.0880233	0.769011	0.885162
chr1	9938610	9938713	104	*	PND_Adult_NF_peak_2125	32	3.00201	5.0814	3.26393	39	Intron (ENSMUST00000171802.7/240697, intron 14 of 14)	1	9942463	9942549	87	2	266793	ENSMUST00000175437.1	3836	ENSMUSG00000093178	Snord87	small nucleolar RNA, C/D box 87	-3836	Snord87	ENSMUST00000175437.1	intronic	intronic	1.05594	-1.03154	9.06874	0.00564292	0.0535327
chr1	9938800	9938925	126	*	PND_Adult_NF_peak_2126	40	3.10709	5.91245	4.05738	53	Intron (ENSMUST00000171802.7/240697, intron 14 of 14)	1	9942463	9942549	87	2	266793	ENSMUST00000175437.1	3624	ENSMUSG00000093178	Snord87	small nucleolar RNA, C/D box 87	-3624	Snord87	ENSMUST00000175437.1	intronic	intronic	0.855994	-0.610001	10.2343	0.00354955	0.040533
chr1	9943690	9944279	590	*	PND_Adult_NF_peak_2127	4934	31.6931	497.401	493.497	488	Promoter	1	9942025	9944103	2079	2	73824	ENSMUST00000182498.7	0	ENSMUSG00000098234	Snhg6	small nucleolar RNA host gene 6	0	Snhg6	ENSMUST00000182498.7	exonic	TSS	0.416499	3.94712	18.4062	0.000210236	0.00727677
chr1	9957307	9957426	120	*	PND_Adult_NF_peak_2129	71	4.86483	9.14834	7.17275	45	Downstream (2-3kb)	1	9960163	9967932	7770	2	100039596	ENSMUST00000185184.1	10506	ENSMUSG00000099032	Tcf24	transcription factor 24	-5383	Tcf24	ENSMUST00000097824.2	intergenic	intergenic	0.867512	-1.1155	6.74461	0.0151332	0.0959079
chr1	9967189	9967608	420	*	PND_Adult_NF_peak_2130	185	4.56531	20.7496	18.5536	361	Promoter	1	9960163	9967932	7770	2	100039596	ENSMUST00000185184.1	324	ENSMUSG00000099032	Tcf24	transcription factor 24	0	RP23-228G18.3	ENSMUST00000192299.1	exonic	TSS	0.494238	1.63206	11.964	0.00184273	0.0273788
chr1	9967688	9968333	646	*	PND_Adult_NF_peak_2131	3322	26.2746	335.677	332.222	282	Promoter	1	9960163	9967932	7770	2	100039596	ENSMUST00000185184.1	0	ENSMUSG00000099032	Tcf24	transcription factor 24	0	Tcf24	ENSMUST00000185184.1	exonic	TSS	0.374948	3.53701	16.9426	0.000333335	0.00964209
chr1	9969056	9969202	147	*	PND_Adult_NF_peak_2132	524	7.93923	54.9612	52.4665	66	Intron (ENSMUST00000147000.8/69312, intron 2 of 2)	1	9960163	9967932	7770	2	100039596	ENSMUST00000185184.1	-1124	ENSMUSG00000099032	Tcf24	transcription factor 24	1124	Tcf24	ENSMUST00000185184.1	intronic	intronic	0.62113	0.551621	6.03933	0.0223153	0.120742
chr1	9983506	9983769	264	*	PND_Adult_NF_peak_2134	628	17.8377	65.4203	62.8651	94	Intron (ENSMUST00000134692.1/ENSMUST00000134692.1, intron 1 of 1)	1	9968624	9985692	17069	2	69312	ENSMUST00000147000.8	1923	ENSMUSG00000025916	Ppp1r42	protein phosphatase 1, regulatory subunit 42	1119	AC102570.3	ENSMUST00000134692.1	intronic	intronic	-0.248053	-0.519457	0.706053	0.408252	0.640066
chr1	9999173	9999397	225	*	PND_Adult_NF_peak_2135	148	7.02104	16.9638	14.8255	65	Intron (ENSMUST00000124874.7/69312, intron 3 of 7)	1	9968624	10003453	34830	2	69312	ENSMUST00000124874.7	4056	ENSMUSG00000025916	Ppp1r42	protein phosphatase 1, regulatory subunit 42	-4056	Ppp1r42	ENSMUST00000124874.7	intronic	intronic	-0.0275408	-0.126184	0.0125003	0.911818	0.959757
chr1	10000128	10000441	314	*	PND_Adult_NF_peak_2136	81	5.05336	10.186	8.18417	107	5' UTR	1	9968624	10003453	34830	2	69312	ENSMUST00000124874.7	3012	ENSMUSG00000025916	Ppp1r42	protein phosphatase 1, regulatory subunit 42	-3012	Ppp1r42	ENSMUST00000124874.7	exonic	exonic	0.58923	-0.724488	4.05455	0.0542791	0.204729
chr1	10008812	10009278	467	*	PND_Adult_NF_peak_2137	680	15.0385	70.6354	68.0531	351	Promoter	1	9968825	10009130	40306	2	69312	ENSMUST00000130102.7	0	ENSMUSG00000025916	Ppp1r42	protein phosphatase 1, regulatory subunit 42	0	Ppp1r42	ENSMUST00000130102.7	exonic	TSS	0.534541	1.77605	8.99498	0.00634605	0.0573722
chr1	10009362	10009518	157	*	PND_Adult_NF_peak_2138	67	4.05638	8.67314	6.7146	44	Promoter	1	9968624	10009136	40513	2	69312	ENSMUST00000027049.9	-226	ENSMUSG00000025916	Ppp1r42	protein phosphatase 1, regulatory subunit 42	226	Ppp1r42	ENSMUST00000027049.9	intergenic	proximal <=1000bp	0.161827	0.580008	0.821868	0.37278	0.61008
chr1	10013984	10014193	210	*	PND_Adult_NF_peak_2139	153	5.63531	17.5104	15.3652	109	Distal Intergenic	1	9968624	10009136	40513	2	69312	ENSMUST00000027049.9	-4848	ENSMUSG00000025916	Ppp1r42	protein phosphatase 1, regulatory subunit 42	4067	Gm24674	ENSMUST00000179194.1	intergenic	intergenic	0.218792	-0.447968	0.673323	0.419194	0.649325
chr1	10014543	10014850	308	*	PND_Adult_NF_peak_2140	225	7.68797	24.748	22.5032	159	Distal Intergenic	1	9968624	10009136	40513	2	69312	ENSMUST00000027049.9	-5407	ENSMUSG00000025916	Ppp1r42	protein phosphatase 1, regulatory subunit 42	4626	Gm24674	ENSMUST00000179194.1	intergenic	intergenic	-0.0912556	-0.429358	0.136455	0.714757	0.854347
chr1	10016051	10016453	403	*	PND_Adult_NF_peak_2141	378	10.6702	40.2284	37.8365	86	Distal Intergenic	1	9968624	10009136	40513	2	69312	ENSMUST00000027049.9	-6915	ENSMUSG00000025916	Ppp1r42	protein phosphatase 1, regulatory subunit 42	6134	Gm24674	ENSMUST00000179194.1	intergenic	intergenic	0.338648	1.15804	4.7027	0.0392391	0.169244
chr1	10037522	10037637	116	*	PND_Adult_NF_peak_2142	170	3.31821	19.2035	17.031	46	Promoter	1	10030920	10037938	7019	2	26754	ENSMUST00000139578.7	301	ENSMUSG00000025917	Cops5	COP9 signalosome subunit 5	-301	Cops5	ENSMUST00000139578.7	exonic	proximal <=1000bp	0.446299	0.904397	7.99552	0.00880055	0.0695861
chr1	10037902	10037986	85	*	PND_Adult_NF_peak_2143	124	2.93301	14.5143	12.4212	32	Promoter	1	10030920	10037938	7019	2	26754	ENSMUST00000139578.7	0	ENSMUSG00000025917	Cops5	COP9 signalosome subunit 5	0	Cops5	ENSMUST00000139578.7	exonic	TSS	0.370623	1.98085	6.57333	0.0163357	0.100457
chr1	10038074	10038283	210	*	PND_Adult_NF_peak_2144	1338	9.50028	136.691	133.836	111	Promoter	1	10024601	10038127	13527	2	26754	ENSMUST00000027050.9	0	ENSMUSG00000025917	Cops5	COP9 signalosome subunit 5	0	Cops5	ENSMUST00000027050.9	exonic	TSS	0.329302	3.06587	8.91956	0.00599619	0.0554823
chr1	10038416	10038626	211	*	PND_Adult_NF_peak_2145	1031	8.14609	105.891	103.15	97	Promoter	1	10038262	10067118	28857	1	211660	ENSMUST00000117415.7	154	ENSMUSG00000056763	Cspp1	centrosome and spindle pole associated protein 1	154	Cspp1	ENSMUST00000117415.7	exonic	proximal <=1000bp	0.402428	2.56284	12.6163	0.00145221	0.0238586
chr1	10039079	10039378	300	*	PND_Adult_NF_peak_2146	1499	10.1803	152.884	149.972	111	Promoter	1	10039767	10058872	19106	1	211660	ENSMUST00000191521.6	-389	ENSMUSG00000056763	Cspp1	centrosome and spindle pole associated protein 1	-389	Cspp1	ENSMUST00000191521.6	exonic	proximal <=1000bp	0.276571	2.65483	6.86573	0.0143417	0.0929462
chr1	10039551	10040260	710	*	PND_Adult_NF_peak_2147	2181	12.8946	221.252	218.125	166	Promoter	1	10039767	10058872	19106	1	211660	ENSMUST00000191521.6	0	ENSMUSG00000056763	Cspp1	centrosome and spindle pole associated protein 1	0	Cspp1	ENSMUST00000191521.6	exonic	TSS	0.381359	4.06211	16.928	0.000334893	0.00967144
chr1	10049428	10049674	247	*	PND_Adult_NF_peak_2148	862	21.5292	88.903	86.2334	118	Intron (ENSMUST00000071087.11/211660, intron 3 of 29)	1	10046493	10136145	89653	1	211660	ENSMUST00000186294.6	2935	ENSMUSG00000056763	Cspp1	centrosome and spindle pole associated protein 1	2935	Cspp1	ENSMUST00000186294.6	intronic	intronic	0.247192	-0.387859	0.885252	0.35524	0.594465
chr1	10062140	10062572	433	*	PND_Adult_NF_peak_2149	2232	35.7241	226.409	223.266	293	Intron (ENSMUST00000071087.11/211660, intron 4 of 29)	1	10056924	10066575	9652	1	211660	ENSMUST00000149214.2	5216	ENSMUSG00000056763	Cspp1	centrosome and spindle pole associated protein 1	4196	RP23-228G18.5	ENSMUST00000194474.1	intronic	intronic	0.528248	1.79842	12.1542	0.00171824	0.0262812
chr1	10089638	10089812	175	*	PND_Adult_NF_peak_2152	318	11.3513	34.1747	31.8318	99	Intron (ENSMUST00000071087.11/211660, intron 14 of 29)	1	10087747	10090317	2571	1	211660	ENSMUST00000123261.1	1891	ENSMUSG00000056763	Cspp1	centrosome and spindle pole associated protein 1	1891	Cspp1	ENSMUST00000123261.1	intronic	intronic	0.368863	-1.06648	1.23047	0.27725	0.519283
chr1	10095190	10095374	185	*	PND_Adult_NF_peak_2153	184	8.10805	20.6158	18.4212	90	Promoter	1	10095864	10108554	12691	1	211660	ENSMUST00000185422.1	-490	ENSMUSG00000056763	Cspp1	centrosome and spindle pole associated protein 1	-490	Cspp1	ENSMUST00000185422.1	intronic	proximal <=1000bp	-0.678353	-0.883882	3.10844	0.0893823	0.273734
chr1	10102165	10102325	161	*	PND_Adult_NF_peak_2155	342	11.8918	36.5902	34.2265	101	Intron (ENSMUST00000071087.11/211660, intron 16 of 29)	1	10104228	10108543	4316	1	211660	ENSMUST00000190625.1	-1903	ENSMUSG00000056763	Cspp1	centrosome and spindle pole associated protein 1	-1903	Cspp1	ENSMUST00000190625.1	intronic	intronic	0.0763286	-0.900897	0.0518783	0.82157	0.914275
chr1	10143903	10144106	204	*	PND_Adult_NF_peak_2156	349	11.922	37.3122	34.9435	110	Intron (ENSMUST00000088615.10/211673, intron 34 of 37)	1	10138690	10141701	3012	2	211673	ENSMUST00000187417.1	-2202	ENSMUSG00000067851	Arfgef1	ADP-ribosylation factor guanine nucleotide-exchange factor 1(brefeldin A-inhibited)	2202	Arfgef1	ENSMUST00000187417.1	intronic	intronic	0.101323	-0.515047	0.157479	0.694657	0.842629
chr1	10164400	10164745	346	*	PND_Adult_NF_peak_2158	207	8.26284	23.0059	20.7807	263	Intron (ENSMUST00000088615.10/211673, intron 21 of 37)	1	10160757	10161306	550	2	211673	ENSMUST00000128834.1	-3094	ENSMUSG00000067851	Arfgef1	ADP-ribosylation factor guanine nucleotide-exchange factor 1(brefeldin A-inhibited)	-1794	Gm26348	ENSMUST00000157528.1	intronic	intronic	0.204242	-0.11103	0.571938	0.45614	0.678953
chr1	10164837	10164930	94	*	PND_Adult_NF_peak_2159	34	3.36867	5.22242	3.4004	66	Intron (ENSMUST00000088615.10/211673, intron 21 of 37)	1	10160757	10161306	550	2	211673	ENSMUST00000128834.1	-3531	ENSMUSG00000067851	Arfgef1	ADP-ribosylation factor guanine nucleotide-exchange factor 1(brefeldin A-inhibited)	-1609	Gm26348	ENSMUST00000157528.1	intronic	intronic	0.359743	-1.01397	0.894248	0.352846	0.592398
chr1	10191833	10192199	367	*	PND_Adult_NF_peak_2161	216	8.91886	23.8403	21.6041	252	Intron (ENSMUST00000088615.10/211673, intron 10 of 37)	1	10209161	10214213	5053	2	211673	ENSMUST00000186720.1	22014	ENSMUSG00000067851	Arfgef1	ADP-ribosylation factor guanine nucleotide-exchange factor 1(brefeldin A-inhibited)	-6603	RP24-327F2.1	ENSMUST00000192111.1	intronic	intronic	0.18471	-0.72695	0.328392	0.571424	0.763833
chr1	10218799	10219010	212	*	PND_Adult_NF_peak_2164	226	9.18913	24.9415	22.6922	102	Intron (ENSMUST00000088615.10/211673, intron 1 of 37)	1	10209161	10214213	5053	2	211673	ENSMUST00000186720.1	-4586	ENSMUSG00000067851	Arfgef1	ADP-ribosylation factor guanine nucleotide-exchange factor 1(brefeldin A-inhibited)	4586	Arfgef1	ENSMUST00000186720.1	intronic	intronic	0.52904	-0.792219	2.57526	0.120364	0.32457
chr1	10232015	10232485	471	*	PND_Adult_NF_peak_2165	368	6.84238	39.2519	36.8666	343	Promoter	1	10137571	10232670	95100	2	211673	ENSMUST00000088615.10	185	ENSMUSG00000067851	Arfgef1	ADP-ribosylation factor guanine nucleotide-exchange factor 1(brefeldin A-inhibited)	-185	Arfgef1	ENSMUST00000131556.1	exonic	proximal <=1000bp	0.416388	2.07763	8.97733	0.00585661	0.0547203
chr1	10232629	10233445	817	*	PND_Adult_NF_peak_2166	1221	14.1875	124.963	122.149	492	Promoter	1	10137571	10232670	95100	2	211673	ENSMUST00000088615.10	0	ENSMUSG00000067851	Arfgef1	ADP-ribosylation factor guanine nucleotide-exchange factor 1(brefeldin A-inhibited)	0	Arfgef1	ENSMUST00000088615.10	exonic	TSS	0.138707	3.18848	0.865308	0.36253	0.601019
chr1	10259276	10260002	727	*	PND_Adult_NF_peak_2167	1541	25.6562	157.109	154.183	479	Distal Intergenic	1	10173075	10232670	59596	2	211673	ENSMUST00000131556.1	-26606	ENSMUSG00000067851	Arfgef1	ADP-ribosylation factor guanine nucleotide-exchange factor 1(brefeldin A-inhibited)	26606	Arfgef1	ENSMUST00000088615.10	intergenic	intergenic	0.00843486	2.2692	0.00441444	0.947524	0.976573
chr1	10282160	10282351	192	*	PND_Adult_NF_peak_2168	451	13.8535	47.6456	45.199	126	Distal Intergenic	1	10173075	10232670	59596	2	211673	ENSMUST00000131556.1	-49490	ENSMUSG00000067851	Arfgef1	ADP-ribosylation factor guanine nucleotide-exchange factor 1(brefeldin A-inhibited)	49490	Arfgef1	ENSMUST00000088615.10	intergenic	intergenic	0.247901	-0.808945	0.557205	0.46194	0.683649
chr1	10291952	10292113	162	*	PND_Adult_NF_peak_2170	544	10.4008	56.9262	54.42	76	Distal Intergenic	1	10173075	10232670	59596	2	211673	ENSMUST00000131556.1	-59282	ENSMUSG00000067851	Arfgef1	ADP-ribosylation factor guanine nucleotide-exchange factor 1(brefeldin A-inhibited)	59282	Arfgef1	ENSMUST00000088615.10	intergenic	intergenic	-0.549891	-0.287585	3.50405	0.0722615	0.242117
chr1	10294648	10295027	380	*	PND_Adult_NF_peak_2171	3172	34.7692	320.686	317.273	198	Distal Intergenic	1	10173075	10232670	59596	2	211673	ENSMUST00000131556.1	-61978	ENSMUSG00000067851	Arfgef1	ADP-ribosylation factor guanine nucleotide-exchange factor 1(brefeldin A-inhibited)	61978	Arfgef1	ENSMUST00000088615.10	intergenic	intergenic	0.534057	2.30965	15.0564	0.000619749	0.0141034
chr1	10379301	10379521	221	*	PND_Adult_NF_peak_2175	2472	39.1578	250.477	247.264	97	Intron (ENSMUST00000153695.7/329093, intron 7 of 9)	1	10472475	10477823	5349	2	329093	ENSMUST00000147575.1	98302	ENSMUSG00000042501	Cpa6	carboxypeptidase A6	-72468	RP23-418C16.1	ENSMUST00000194845.1	intronic	intronic	-0.0341775	1.18851	0.0468283	0.830329	0.919197
chr1	10507219	10507422	204	*	PND_Adult_NF_peak_2180	601	17.2972	62.6501	60.1101	97	Intron (ENSMUST00000153695.7/329093, intron 2 of 9)	1	10472475	10477823	5349	2	329093	ENSMUST00000147575.1	-29396	ENSMUSG00000042501	Cpa6	carboxypeptidase A6	29396	Cpa6	ENSMUST00000147575.1	intronic	intronic	0.221118	-0.533233	0.60831	0.442315	0.668034
chr1	10622637	10622762	126	*	PND_Adult_NF_peak_2185	88	5.40537	10.872	8.85172	50	Intron (ENSMUST00000153695.7/329093, intron 1 of 9)	1	10595366	10719905	124540	2	329093	ENSMUST00000140938.1	97143	ENSMUSG00000042501	Cpa6	carboxypeptidase A6	66977	Gm25253	ENSMUST00000179958.1	intronic	intronic	0.185753	-1.19518	0.275715	0.603876	0.785378
chr1	10656269	10656469	201	*	PND_Adult_NF_peak_2188	184	8.10805	20.6158	18.4212	101	Intron (ENSMUST00000153695.7/329093, intron 1 of 9)	1	10595366	10719905	124540	2	329093	ENSMUST00000140938.1	63436	ENSMUSG00000042501	Cpa6	carboxypeptidase A6	-38654	AC102426.1	ENSMUST00000119252.1	intronic	intronic	-0.242682	-0.974398	0.376017	0.544954	0.745299
chr1	10695075	10695629	555	*	PND_Adult_NF_peak_2189	481	12.9942	50.6632	48.1955	80	Exon (ENSMUST00000119252.1/ENSMUST00000119252.1, exon 1 of 1)	1	10595366	10719905	124540	2	329093	ENSMUST00000140938.1	24276	ENSMUSG00000042501	Cpa6	carboxypeptidase A6	0	AC102426.1	ENSMUST00000119252.1	exonic	TSS	0.268914	1.53333	2.66195	0.114568	0.315748
chr1	10719873	10720055	183	*	PND_Adult_NF_peak_2190	63	4.59456	8.32052	6.36926	96	Promoter	1	10595366	10719905	124540	2	329093	ENSMUST00000140938.1	0	ENSMUSG00000042501	Cpa6	carboxypeptidase A6	0	Cpa6	ENSMUST00000140938.1	exonic	TSS	0.471298	-0.754787	1.78282	0.193194	0.424602
chr1	10805215	10806203	989	*	PND_Adult_NF_peak_2192	466	12.3546	49.0789	46.6227	142	Exon (ENSMUST00000189483.1/ENSMUST00000189483.1, exon 1 of 1)	1	10324727	10719945	395219	2	329093	ENSMUST00000035577.6	-85270	ENSMUSG00000042501	Cpa6	carboxypeptidase A6	0	RP24-88A10.1	ENSMUST00000189483.1	exonic	TSS	-0.0129042	0.770988	0.00460609	0.946398	0.976055
chr1	10877488	10877689	202	*	PND_Adult_NF_peak_2193	106	5.9459	12.6794	10.6183	124	Distal Intergenic	1	10993465	11303681	310217	1	109294	ENSMUST00000027056.11	-115776	ENSMUSG00000048960	Prex2	phosphatidylinositol-3,4,5-trisphosphate-dependent Rac exchange factor 2	8800	RP24-467J24.1	ENSMUST00000188013.1	intergenic	intergenic	-0.60994	-1.30537	1.6663	0.20787	0.4424
chr1	10880059	10880281	223	*	PND_Adult_NF_peak_2194	63	4.59456	8.32052	6.36926	19	Distal Intergenic	1	10993465	11303681	310217	1	109294	ENSMUST00000027056.11	-113184	ENSMUSG00000048960	Prex2	phosphatidylinositol-3,4,5-trisphosphate-dependent Rac exchange factor 2	11371	RP24-467J24.1	ENSMUST00000188013.1	intergenic	intergenic	0.454025	-0.304958	3.92331	0.0580564	0.213091
chr1	10880379	10880614	236	*	PND_Adult_NF_peak_2195	173	7.83778	19.5687	17.3886	125	Distal Intergenic	1	10993465	11303681	310217	1	109294	ENSMUST00000027056.11	-112851	ENSMUSG00000048960	Prex2	phosphatidylinositol-3,4,5-trisphosphate-dependent Rac exchange factor 2	11691	RP24-467J24.1	ENSMUST00000188013.1	intergenic	intergenic	0.0748322	-0.153398	0.107791	0.745246	0.872063
chr1	10932854	10933107	254	*	PND_Adult_NF_peak_2196	57	4.10231	7.65486	5.72636	38	Distal Intergenic	1	10993465	11303681	310217	1	109294	ENSMUST00000027056.11	-60358	ENSMUSG00000048960	Prex2	phosphatidylinositol-3,4,5-trisphosphate-dependent Rac exchange factor 2	11184	Gm22963	ENSMUST00000157960.1	intergenic	intergenic	0.418675	-0.299571	2.74773	0.10915	0.307145
chr1	10933416	10933556	141	*	PND_Adult_NF_peak_2197	63	4.28276	8.31054	6.36737	86	Distal Intergenic	1	10993465	11303681	310217	1	109294	ENSMUST00000027056.11	-59909	ENSMUSG00000048960	Prex2	phosphatidylinositol-3,4,5-trisphosphate-dependent Rac exchange factor 2	11746	Gm22963	ENSMUST00000157960.1	intergenic	intergenic	0.522069	-0.739906	2.76429	0.108139	0.305517
chr1	10933848	10934172	325	*	PND_Adult_NF_peak_2198	157	6.81395	17.8963	15.7428	271	Distal Intergenic	1	10993465	11303681	310217	1	109294	ENSMUST00000027056.11	-59293	ENSMUSG00000048960	Prex2	phosphatidylinositol-3,4,5-trisphosphate-dependent Rac exchange factor 2	12178	Gm22963	ENSMUST00000157960.1	intergenic	intergenic	0.148837	0.254781	0.385961	0.539738	0.741546
chr1	10957158	10957330	173	*	PND_Adult_NF_peak_2200	391	12.9729	41.5363	39.1328	68	Distal Intergenic	1	10993465	11303681	310217	1	109294	ENSMUST00000027056.11	-36135	ENSMUSG00000048960	Prex2	phosphatidylinositol-3,4,5-trisphosphate-dependent Rac exchange factor 2	35488	Gm22963	ENSMUST00000157960.1	intergenic	intergenic	-0.0483541	-1.05502	0.0227071	0.881359	0.944749
chr1	10993382	10993694	313	*	PND_Adult_NF_peak_2204	146	5.1444	16.8145	14.6781	220	Promoter	1	10993465	11303681	310217	1	109294	ENSMUST00000027056.11	0	ENSMUSG00000048960	Prex2	phosphatidylinositol-3,4,5-trisphosphate-dependent Rac exchange factor 2	0	Prex2	ENSMUST00000027056.11	exonic	TSS	-0.0933991	0.85279	0.26776	0.609118	0.788788
chr1	10993805	10993960	156	*	PND_Adult_NF_peak_2205	132	4.88601	15.3105	13.2019	49	Promoter	1	10993465	11303681	310217	1	109294	ENSMUST00000027056.11	340	ENSMUSG00000048960	Prex2	phosphatidylinositol-3,4,5-trisphosphate-dependent Rac exchange factor 2	287	Prex2	ENSMUST00000190935.1	exonic	proximal <=1000bp	0.0299876	0.177667	0.0201071	0.888308	0.948125
chr1	10996686	10996989	304	*	PND_Adult_NF_peak_2206	1589	21.3126	161.895	158.953	127	Intron (ENSMUST00000027056.11/109294, intron 1 of 39)	1	10993465	11303681	310217	1	109294	ENSMUST00000027056.11	3221	ENSMUSG00000048960	Prex2	phosphatidylinositol-3,4,5-trisphosphate-dependent Rac exchange factor 2	3168	Prex2	ENSMUST00000190935.1	intronic	intronic	0.655243	1.37696	13.5537	0.00107697	0.0198011
chr1	11065278	11065671	394	*	PND_Adult_NF_peak_2211	366	12.4323	39.0446	36.6607	64	Intron (ENSMUST00000027056.11/109294, intron 2 of 39)	1	11098530	11150071	51542	1	109294	ENSMUST00000189822.1	-32859	ENSMUSG00000048960	Prex2	phosphatidylinositol-3,4,5-trisphosphate-dependent Rac exchange factor 2	-32859	Prex2	ENSMUST00000189822.1	intronic	intronic	0.107184	0.173008	0.291777	0.593581	0.778755
chr1	11107916	11108080	165	*	PND_Adult_NF_peak_2212	134	6.75671	15.5317	13.4158	81	Intron (ENSMUST00000027056.11/109294, intron 9 of 39)	1	11098530	11150071	51542	1	109294	ENSMUST00000189822.1	9386	ENSMUSG00000048960	Prex2	phosphatidylinositol-3,4,5-trisphosphate-dependent Rac exchange factor 2	9386	Prex2	ENSMUST00000189822.1	intronic	intronic	-0.10846	-0.641375	0.0695151	0.794579	0.899757
chr1	11177746	11178062	317	*	PND_Adult_NF_peak_2217	163	7.56752	18.5361	16.3714	131	Intron (ENSMUST00000027056.11/109294, intron 25 of 39)	1	11140691	11160596	19906	1	109294	ENSMUST00000187694.1	37055	ENSMUSG00000048960	Prex2	phosphatidylinositol-3,4,5-trisphosphate-dependent Rac exchange factor 2	37055	Prex2	ENSMUST00000187694.1	intronic	intronic	0.280957	-0.206613	1.23823	0.275775	0.517807
chr1	11295176	11296016	841	*	PND_Adult_NF_peak_2221	290	10.3204	31.3843	29.0685	167	Intron (ENSMUST00000027056.11/109294, intron 39 of 39)	1	11283993	11298204	14212	1	109294	ENSMUST00000188154.1	11183	ENSMUSG00000048960	Prex2	phosphatidylinositol-3,4,5-trisphosphate-dependent Rac exchange factor 2	11183	Prex2	ENSMUST00000188154.1	intronic	intronic	0.267661	1.51091	3.8907	0.0590404	0.21511
chr1	11324414	11324592	179	*	PND_Adult_NF_peak_2222	783	17.4443	80.9535	78.3205	106	Distal Intergenic	1	11283993	11298204	14212	1	109294	ENSMUST00000188154.1	40421	ENSMUSG00000048960	Prex2	phosphatidylinositol-3,4,5-trisphosphate-dependent Rac exchange factor 2	40421	Prex2	ENSMUST00000188154.1	intergenic	intergenic	0.0754683	1.01137	0.142453	0.708953	0.851018
chr1	11324685	11324761	77	*	PND_Adult_NF_peak_2223	50	3.26235	6.93515	5.03249	25	Distal Intergenic	1	11283993	11298204	14212	1	109294	ENSMUST00000188154.1	40692	ENSMUSG00000048960	Prex2	phosphatidylinositol-3,4,5-trisphosphate-dependent Rac exchange factor 2	40692	Prex2	ENSMUST00000188154.1	intergenic	intergenic	-0.0649984	0.545199	0.0924518	0.763451	0.882149
chr1	11329388	11329802	415	*	PND_Adult_NF_peak_2224	1501	21.9344	153.097	150.184	275	Distal Intergenic	1	11283993	11298204	14212	1	109294	ENSMUST00000188154.1	45395	ENSMUSG00000048960	Prex2	phosphatidylinositol-3,4,5-trisphosphate-dependent Rac exchange factor 2	-37162	RP23-366M5.2	ENSMUST00000193623.1	intergenic	intergenic	0.241842	1.9387	2.7524	0.108864	0.306675
chr1	11330102	11330198	97	*	PND_Adult_NF_peak_2225	116	4.8093	13.7197	11.638	36	Distal Intergenic	1	11283993	11298204	14212	1	109294	ENSMUST00000188154.1	46109	ENSMUSG00000048960	Prex2	phosphatidylinositol-3,4,5-trisphosphate-dependent Rac exchange factor 2	-36766	RP23-366M5.2	ENSMUST00000193623.1	intergenic	intergenic	0.463484	-0.682483	2.48803	0.126543	0.334374
chr1	11413887	11414521	635	*	PND_Adult_NF_peak_2227	1117	18.0773	114.488	111.713	470	Promoter	1	11414105	11601811	187707	1	320492	ENSMUST00000171690.8	0	ENSMUSG00000057715	A830018L16Rik	RIKEN cDNA A830018L16 gene	0	AC103635.1	ENSMUST00000171690.8	exonic	TSS	-0.159225	2.42352	1.64201	0.211116	0.446012
chr1	11444218	11444468	251	*	PND_Adult_NF_peak_2230	249	9.72966	27.1811	24.9065	68	Intron (ENSMUST00000171690.8/320492, intron 1 of 7)	1	11414509	11975397	560889	1	320492	ENSMUST00000179089.7	29709	ENSMUSG00000057715	A830018L16Rik	RIKEN cDNA A830018L16 gene	27300	RP23-2K13.1	ENSMUST00000194502.1	intronic	intronic	-0.036475	-0.659158	0.0147574	0.904225	0.956013
chr1	11444709	11444998	290	*	PND_Adult_NF_peak_2231	237	9.45939	26.0552	23.7932	118	Intron (ENSMUST00000171690.8/320492, intron 1 of 7)	1	11414509	11975397	560889	1	320492	ENSMUST00000179089.7	30200	ENSMUSG00000057715	A830018L16Rik	RIKEN cDNA A830018L16 gene	27791	RP23-2K13.1	ENSMUST00000194502.1	intronic	intronic	-0.609462	-1.08684	2.93553	0.0982919	0.289115
chr1	11521711	11522198	488	*	PND_Adult_NF_peak_2234	546	16.2161	57.1911	54.6825	53	Intron (ENSMUST00000171690.8/320492, intron 3 of 7)	1	11518671	11599993	81323	1	320492	ENSMUST00000141339.2	3040	ENSMUSG00000057715	A830018L16Rik	RIKEN cDNA A830018L16 gene	3040	AC103635.1	ENSMUST00000141339.2	intronic	intronic	-0.0322234	0.62604	0.0299416	0.863934	0.936011
chr1	11564945	11565235	291	*	PND_Adult_NF_peak_2236	124	6.48644	14.5631	12.4648	230	Intron (ENSMUST00000171690.8/320492, intron 5 of 7)	1	11579306	11596631	17326	1	320492	ENSMUST00000191437.1	-14071	ENSMUSG00000057715	A830018L16Rik	RIKEN cDNA A830018L16 gene	-14071	AC103635.1	ENSMUST00000191437.1	intronic	intronic	0.0837011	-0.0691927	0.141711	0.709574	0.851327
chr1	11588038	11588232	195	*	PND_Adult_NF_peak_2238	55	4.32429	7.51705	5.59157	43	Intron (ENSMUST00000171690.8/320492, intron 5 of 7)	1	11579306	11596631	17326	1	320492	ENSMUST00000191437.1	8732	ENSMUSG00000057715	A830018L16Rik	RIKEN cDNA A830018L16 gene	8732	AC103635.1	ENSMUST00000191437.1	intronic	intronic	-0.830851	-0.210024	6.99178	0.0137661	0.0906611
chr1	11588363	11588597	235	*	PND_Adult_NF_peak_2239	719	19.3785	74.5682	71.9658	134	3' UTR	1	11579306	11596631	17326	1	320492	ENSMUST00000191437.1	9057	ENSMUSG00000057715	A830018L16Rik	RIKEN cDNA A830018L16 gene	9057	AC103635.1	ENSMUST00000191437.1	exonic	exonic	-0.219688	0.998018	1.1483	0.293861	0.536069
chr1	11656628	11656957	330	*	PND_Adult_NF_peak_2241	260	9.99993	28.3188	26.0322	239	Intron (ENSMUST00000048613.13/320492, intron 7 of 13)	1	11579306	11596631	17326	1	320492	ENSMUST00000191437.1	77322	ENSMUSG00000057715	A830018L16Rik	RIKEN cDNA A830018L16 gene	-47250	RP24-239K20.1	ENSMUST00000195360.1	intronic	intronic	0.502147	-0.863564	1.98949	0.169991	0.394848
chr1	11657825	11657969	145	*	PND_Adult_NF_peak_2242	480	14.8648	50.5296	48.0627	56	Intron (ENSMUST00000048613.13/320492, intron 7 of 13)	1	11579306	11596631	17326	1	320492	ENSMUST00000191437.1	78519	ENSMUSG00000057715	A830018L16Rik	RIKEN cDNA A830018L16 gene	-46238	RP24-239K20.1	ENSMUST00000195360.1	intronic	intronic	0.503295	-0.708971	3.23131	0.083613	0.263387
chr1	11757961	11758116	156	*	PND_Adult_NF_peak_2246	194	8.37832	21.6771	19.4682	69	Intron (ENSMUST00000048613.13/320492, intron 8 of 13)	1	11579306	11596631	17326	1	320492	ENSMUST00000191437.1	178655	ENSMUSG00000057715	A830018L16Rik	RIKEN cDNA A830018L16 gene	53754	RP24-239K20.1	ENSMUST00000195360.1	intronic	intronic	0.276511	-0.690912	0.789484	0.382227	0.618049
chr1	11972487	11972648	162	*	PND_Adult_NF_peak_2248	55	4.32429	7.51705	5.59157	117	Intron (ENSMUST00000048613.13/320492, intron 13 of 13)	1	11579306	11596631	17326	1	320492	ENSMUST00000191437.1	393181	ENSMUSG00000057715	A830018L16Rik	RIKEN cDNA A830018L16 gene	-148312	RP23-334J7.1	ENSMUST00000187748.1	intronic	intronic	0.684688	-0.564225	6.48875	0.0169678	0.102806
chr1	12184290	12184630	341	*	PND_Adult_NF_peak_2254	1736	35.4405	176.62	173.63	249	Distal Intergenic	1	12425986	12426106	121	1	102465961	ENSMUST00000183490.1	-241356	ENSMUSG00000098555	Mir6341	microRNA 6341	63330	RP23-334J7.1	ENSMUST00000187748.1	intergenic	intergenic	0.533497	0.112141	7.12173	0.0128138	0.0868148
chr1	12232070	12232295	226	*	PND_Adult_NF_peak_2255	1361	20.7353	139.035	136.171	147	Distal Intergenic	1	12425986	12426106	121	1	102465961	ENSMUST00000183490.1	-193691	ENSMUSG00000098555	Mir6341	microRNA 6341	111110	RP23-334J7.1	ENSMUST00000187748.1	intergenic	intergenic	0.496959	0.844157	8.96958	0.00587515	0.0548165
chr1	12233286	12233647	362	*	PND_Adult_NF_peak_2256	903	15.7883	93.0703	90.3824	124	Distal Intergenic	1	12425986	12426106	121	1	102465961	ENSMUST00000183490.1	-192339	ENSMUSG00000098555	Mir6341	microRNA 6341	112326	RP23-334J7.1	ENSMUST00000187748.1	intergenic	intergenic	0.902635	1.04411	19.233	0.000196505	0.00698567
chr1	12234360	12234646	287	*	PND_Adult_NF_peak_2257	163	5.69504	18.4707	16.3103	185	Distal Intergenic	1	12425986	12426106	121	1	102465961	ENSMUST00000183490.1	-191340	ENSMUSG00000098555	Mir6341	microRNA 6341	113400	RP23-334J7.1	ENSMUST00000187748.1	intergenic	intergenic	0.473868	0.432976	5.08288	0.0326172	0.151896
chr1	12334251	12334415	165	*	PND_Adult_NF_peak_2258	237	9.45939	26.0552	23.7932	62	Distal Intergenic	1	12425986	12426106	121	1	102465961	ENSMUST00000183490.1	-91571	ENSMUSG00000098555	Mir6341	microRNA 6341	-40521	Gm22633	ENSMUST00000179834.1	intergenic	intergenic	0.435609	-1.10333	1.47277	0.235583	0.474383
chr1	12422436	12422603	168	*	PND_Adult_NF_peak_2261	106	5.9459	12.6794	10.6183	101	Distal Intergenic	1	12425986	12426106	121	1	102465961	ENSMUST00000183490.1	-3383	ENSMUSG00000098555	Mir6341	microRNA 6341	-3383	Mir6341	ENSMUST00000183490.1	intergenic	intergenic	0.145427	-0.562138	0.290057	0.594666	0.779496
chr1	12510690	12510775	86	*	PND_Adult_NF_peak_2262	55	4.32429	7.51705	5.59157	36	Distal Intergenic	1	12425986	12426106	121	1	102465961	ENSMUST00000183490.1	84704	ENSMUSG00000098555	Mir6341	microRNA 6341	-54802	RP23-138D5.1	ENSMUST00000181461.1	intergenic	intergenic	0.305748	-1.10134	0.513506	0.480022	0.697212
chr1	12551008	12551246	239	*	PND_Adult_NF_peak_2264	54	4.26428	7.40538	5.49134	25	Distal Intergenic	1	12667563	12673090	5528	1	329096	ENSMUST00000181272.1	-116317	ENSMUSG00000097171	Gm17644	predicted gene, 17644	-14331	RP23-138D5.1	ENSMUST00000181461.1	intergenic	intergenic	0.336431	-0.190655	1.29829	0.265082	0.506366
chr1	12551394	12551538	145	*	PND_Adult_NF_peak_2265	215	8.90152	23.8052	21.5721	68	Distal Intergenic	1	12667563	12673090	5528	1	329096	ENSMUST00000181272.1	-116025	ENSMUSG00000097171	Gm17644	predicted gene, 17644	-14039	RP23-138D5.1	ENSMUST00000181461.1	intergenic	intergenic	0.0435551	-0.0462811	0.0242982	0.877334	0.942589
chr1	12551807	12552186	380	*	PND_Adult_NF_peak_2266	55	4.32429	7.51705	5.59157	233	Distal Intergenic	1	12667563	12673090	5528	1	329096	ENSMUST00000181272.1	-115377	ENSMUSG00000097171	Gm17644	predicted gene, 17644	-13391	RP23-138D5.1	ENSMUST00000181461.1	intergenic	intergenic	0.121665	0.0319433	0.311639	0.581348	0.770663
chr1	12577037	12577199	163	*	PND_Adult_NF_peak_2268	134	6.75671	15.5317	13.4158	73	Distal Intergenic	1	12667563	12673090	5528	1	329096	ENSMUST00000181272.1	-90364	ENSMUSG00000097171	Gm17644	predicted gene, 17644	11460	RP23-138D5.1	ENSMUST00000181461.1	intergenic	intergenic	0.177753	-0.744292	0.246796	0.623477	0.79824
chr1	12587330	12587651	322	*	PND_Adult_NF_peak_2270	216	8.91886	23.8403	21.6041	67	Distal Intergenic	1	12667563	12673090	5528	1	329096	ENSMUST00000181272.1	-79912	ENSMUSG00000097171	Gm17644	predicted gene, 17644	21753	RP23-138D5.1	ENSMUST00000181461.1	intergenic	intergenic	-0.0193709	0.014758	0.00739533	0.932114	0.969465
chr1	12620950	12621180	231	*	PND_Adult_NF_peak_2271	2085	34.775	211.601	208.503	95	Distal Intergenic	1	12667563	12673090	5528	1	329096	ENSMUST00000181272.1	-46383	ENSMUSG00000097171	Gm17644	predicted gene, 17644	-34687	RP24-331K22.1	ENSMUST00000182390.1	intergenic	intergenic	0.00472826	1.26115	0.000936263	0.975818	0.989543
chr1	12643838	12643965	128	*	PND_Adult_NF_peak_2272	35	3.14314	5.39282	3.55274	38	Distal Intergenic	1	12667563	12673090	5528	1	329096	ENSMUST00000181272.1	-23598	ENSMUSG00000097171	Gm17644	predicted gene, 17644	-11902	RP24-331K22.1	ENSMUST00000182390.1	intergenic	intergenic	-0.290357	0.266471	1.67134	0.207204	0.44163
chr1	12644095	12644537	443	*	PND_Adult_NF_peak_2273	2020	32.0161	205.167	202.088	118	Distal Intergenic	1	12667563	12673090	5528	1	329096	ENSMUST00000181272.1	-23026	ENSMUSG00000097171	Gm17644	predicted gene, 17644	-11330	RP24-331K22.1	ENSMUST00000182390.1	intergenic	intergenic	-0.410695	2.15599	7.97928	0.00886115	0.0698947
chr1	12692234	12692653	420	*	PND_Adult_NF_peak_2276	688	13.9946	71.4116	68.8251	229	Promoter	1	12692277	12861192	168916	1	240725	ENSMUST00000177608.7	0	ENSMUSG00000016918	Sulf1	sulfatase 1	0	Sulf1	ENSMUST00000177608.7	exonic	TSS	0.189997	1.49691	1.40568	0.246265	0.48617
chr1	12692925	12693141	217	*	PND_Adult_NF_peak_2277	85	4.01959	10.5365	8.52833	122	Promoter	1	12692532	12852489	159958	1	240725	ENSMUST00000186051.6	393	ENSMUSG00000016918	Sulf1	sulfatase 1	393	Sulf1	ENSMUST00000186051.6	intronic	proximal <=1000bp	-0.0690907	0.186544	0.105786	0.74754	0.873418
chr1	12697623	12697833	211	*	PND_Adult_NF_peak_2278	230	7.91551	25.3143	23.0616	105	Intron (ENSMUST00000177608.7/240725, intron 1 of 21)	1	12692532	12852489	159958	1	240725	ENSMUST00000186051.6	5091	ENSMUSG00000016918	Sulf1	sulfatase 1	5091	Sulf1	ENSMUST00000186051.6	intronic	intronic	0.253205	-0.61731	0.557748	0.461814	0.683559
chr1	12697920	12698212	293	*	PND_Adult_NF_peak_2279	687	16.2026	71.3408	68.7546	92	Intron (ENSMUST00000177608.7/240725, intron 1 of 21)	1	12692532	12852489	159958	1	240725	ENSMUST00000186051.6	5388	ENSMUSG00000016918	Sulf1	sulfatase 1	5388	Sulf1	ENSMUST00000186051.6	intronic	intronic	-0.000774114	0.272892	8.83454e-06	0.997651	0.999039
chr1	12707680	12707900	221	*	PND_Adult_NF_peak_2280	567	15.0803	59.3006	56.7801	108	Intron (ENSMUST00000177608.7/240725, intron 1 of 21)	1	12718459	12822916	104458	1	240725	ENSMUST00000187376.6	-10559	ENSMUSG00000016918	Sulf1	sulfatase 1	-10559	Sulf1	ENSMUST00000187376.6	intronic	intronic	0.364432	0.0797552	3.51975	0.0716635	0.240977
chr1	12711371	12711900	530	*	PND_Adult_NF_peak_2281	121	6.12571	14.2564	12.1671	410	Intron (ENSMUST00000177608.7/240725, intron 1 of 21)	1	12718459	12822916	104458	1	240725	ENSMUST00000187376.6	-6559	ENSMUSG00000016918	Sulf1	sulfatase 1	-6559	Sulf1	ENSMUST00000187376.6	intronic	intronic	0.160153	0.365792	0.678406	0.417465	0.647942
chr1	12717965	12718687	723	*	PND_Adult_NF_peak_2282	1377	23.9771	140.655	137.786	288	Promoter	1	12718459	12822916	104458	1	240725	ENSMUST00000187376.6	0	ENSMUSG00000016918	Sulf1	sulfatase 1	0	Sulf1	ENSMUST00000187376.6	exonic	TSS	0.182564	2.30564	1.92195	0.177161	0.404172
chr1	12729264	12729944	681	*	PND_Adult_NF_peak_2283	5535	34.7657	557.61	553.541	505	Intron (ENSMUST00000177608.7/240725, intron 2 of 21)	1	12728119	12786639	58521	1	240725	ENSMUST00000186405.6	1145	ENSMUSG00000016918	Sulf1	sulfatase 1	1145	Sulf1	ENSMUST00000186405.6	intronic	intronic	0.349481	3.84924	12.3205	0.00161686	0.0253922
chr1	12730195	12730437	243	*	PND_Adult_NF_peak_2284	647	8.36304	67.3564	64.791	121	Intron (ENSMUST00000177608.7/240725, intron 2 of 21)	1	12728119	12786639	58521	1	240725	ENSMUST00000186405.6	2076	ENSMUSG00000016918	Sulf1	sulfatase 1	2076	Sulf1	ENSMUST00000186405.6	intronic	intronic	0.224762	1.71899	2.90465	0.0999885	0.291948
chr1	12751324	12751620	297	*	PND_Adult_NF_peak_2287	1357	26.8868	138.575	135.713	176	Intron (ENSMUST00000177608.7/240725, intron 2 of 21)	1	12728119	12786639	58521	1	240725	ENSMUST00000186405.6	23205	ENSMUSG00000016918	Sulf1	sulfatase 1	23205	Sulf1	ENSMUST00000186405.6	intronic	intronic	-0.279984	0.595344	1.58093	0.219677	0.456109
chr1	12776532	12776842	311	*	PND_Adult_NF_peak_2290	2195	34.3524	222.633	219.502	168	Intron (ENSMUST00000177608.7/240725, intron 2 of 21)	1	12785443	12788818	3376	1	240725	ENSMUST00000186674.1	-8601	ENSMUSG00000016918	Sulf1	sulfatase 1	-8601	Sulf1	ENSMUST00000186674.1	intronic	intronic	-0.0913073	1.35355	0.361765	0.552623	0.7506
chr1	12808141	12808875	735	*	PND_Adult_NF_peak_2291	1520	25.6073	155	152.081	81	Intron (ENSMUST00000177608.7/240725, intron 7 of 21)	1	12785443	12788818	3376	1	240725	ENSMUST00000186674.1	22698	ENSMUSG00000016918	Sulf1	sulfatase 1	22698	Sulf1	ENSMUST00000186674.1	intronic	intronic	0.267856	2.33311	4.45634	0.0443249	0.181784
chr1	12814457	12814604	148	*	PND_Adult_NF_peak_2293	153	7.29725	17.5188	15.3698	71	Intron (ENSMUST00000177608.7/240725, intron 7 of 21)	1	12836028	12840497	4470	1	240725	ENSMUST00000189447.1	-21424	ENSMUSG00000016918	Sulf1	sulfatase 1	-21424	Sulf1	ENSMUST00000189447.1	intronic	intronic	-1.20884	-1.22323	7.14617	0.0126775	0.0862299
chr1	12831873	12832051	179	*	PND_Adult_NF_peak_2295	434	11.9002	45.9116	43.4766	75	Intron (ENSMUST00000177608.7/240725, intron 12 of 21)	1	12836028	12840497	4470	1	240725	ENSMUST00000189447.1	-3977	ENSMUSG00000016918	Sulf1	sulfatase 1	-3977	Sulf1	ENSMUST00000189447.1	intronic	intronic	0.195076	-0.61008	0.338773	0.565462	0.759873
chr1	12835394	12835515	122	*	PND_Adult_NF_peak_2296	43	3.32663	6.22646	4.35177	49	Promoter	1	12836028	12840497	4470	1	240725	ENSMUST00000189447.1	-513	ENSMUSG00000016918	Sulf1	sulfatase 1	-513	Sulf1	ENSMUST00000189447.1	intronic	proximal <=1000bp	0.391611	-0.600403	1.68676	0.205183	0.439044
chr1	12836051	12836227	177	*	PND_Adult_NF_peak_2297	48	2.72941	6.77306	4.87431	74	Promoter	1	12836028	12840497	4470	1	240725	ENSMUST00000189447.1	23	ENSMUSG00000016918	Sulf1	sulfatase 1	23	Sulf1	ENSMUST00000189447.1	exonic	proximal <=1000bp	0.0861365	-0.26067	0.142379	0.708924	0.850995
chr1	12840478	12840792	315	*	PND_Adult_NF_peak_2299	5136	40.6162	517.56	513.601	139	Exon (ENSMUST00000177608.7/240725, exon 16 of 22)	1	12842791	12861192	18402	1	240725	ENSMUST00000185780.1	-1999	ENSMUSG00000016918	Sulf1	sulfatase 1	-1999	Sulf1	ENSMUST00000185780.1	exonic	exonic	0.364261	0.438915	3.52258	0.0715563	0.240826
chr1	12850889	12851155	267	*	PND_Adult_NF_peak_2300	1609	26.6283	163.875	160.926	124	3' UTR	1	12842791	12861192	18402	1	240725	ENSMUST00000185780.1	8098	ENSMUSG00000016918	Sulf1	sulfatase 1	8098	Sulf1	ENSMUST00000185780.1	exonic	exonic	-0.0694422	1.46084	0.248109	0.622506	0.797546
chr1	12851329	12851462	134	*	PND_Adult_NF_peak_2301	273	7.17872	29.6824	27.3824	62	3' UTR	1	12842791	12861192	18402	1	240725	ENSMUST00000185780.1	8538	ENSMUSG00000016918	Sulf1	sulfatase 1	8538	Sulf1	ENSMUST00000185780.1	exonic	exonic	0.137107	0.489813	0.341426	0.564125	0.758935
chr1	12856258	12856496	239	*	PND_Adult_NF_peak_2302	3799	43.515	383.491	379.905	126	Intron (ENSMUST00000177608.7/240725, intron 21 of 21)	1	12842791	12861192	18402	1	240725	ENSMUST00000185780.1	13467	ENSMUSG00000016918	Sulf1	sulfatase 1	13467	Sulf1	ENSMUST00000185780.1	intronic	intronic	0.348607	1.64602	5.18409	0.0310707	0.147423
chr1	12864989	12865623	635	*	PND_Adult_NF_peak_2304	1154	18.7054	118.261	115.472	302	Downstream (<1kb)	1	12842791	12861192	18402	1	240725	ENSMUST00000185780.1	22198	ENSMUSG00000016918	Sulf1	sulfatase 1	22198	Sulf1	ENSMUST00000185780.1	intergenic	intergenic	-0.0127702	2.4358	0.00859793	0.926817	0.966869
chr1	12866089	12866212	124	*	PND_Adult_NF_peak_2305	168	5.75144	19.0349	16.8644	67	Downstream (<1kb)	1	12842791	12861192	18402	1	240725	ENSMUST00000185780.1	23298	ENSMUSG00000016918	Sulf1	sulfatase 1	23298	Sulf1	ENSMUST00000185780.1	intergenic	intergenic	-0.16489	-0.336344	0.398142	0.533439	0.736615
chr1	12875345	12875889	545	*	PND_Adult_NF_peak_2306	163	7.56752	18.5361	16.3714	222	Intron (ENSMUST00000188454.6/240726, intron 9 of 9)	1	12842791	12861192	18402	1	240725	ENSMUST00000185780.1	32554	ENSMUSG00000016918	Sulf1	sulfatase 1	32554	Sulf1	ENSMUST00000185780.1	intronic	intronic	0.0643193	0.722254	0.16063	0.69178	0.840969
chr1	12931910	12932138	229	*	PND_Adult_NF_peak_2309	1007	21.1943	103.436	100.705	97	Intron (ENSMUST00000188454.6/240726, intron 4 of 9)	1	12881330	12925043	43714	2	240726	ENSMUST00000133201.2	-6867	ENSMUSG00000025938	Slco5a1	solute carrier organic anion transporter family, member 5A1	6867	Slco5a1	ENSMUST00000133201.2	intronic	intronic	0.931258	0.233645	22.5475	6.20643e-05	0.00349889
chr1	12935892	12936045	154	*	PND_Adult_NF_peak_2310	987	16.3987	101.461	98.7379	83	Intron (ENSMUST00000188454.6/240726, intron 4 of 9)	1	12881330	12925043	43714	2	240726	ENSMUST00000133201.2	-10849	ENSMUSG00000025938	Slco5a1	solute carrier organic anion transporter family, member 5A1	10849	Slco5a1	ENSMUST00000133201.2	intronic	intronic	0.192765	-0.0691507	0.554549	0.462999	0.684464
chr1	12939607	12939865	259	*	PND_Adult_NF_peak_2311	2117	31.6562	214.871	211.763	146	Intron (ENSMUST00000188454.6/240726, intron 3 of 9)	1	12881330	12925043	43714	2	240726	ENSMUST00000133201.2	-14564	ENSMUSG00000025938	Slco5a1	solute carrier organic anion transporter family, member 5A1	14564	Slco5a1	ENSMUST00000133201.2	intronic	intronic	0.264927	1.04216	2.28033	0.142821	0.357863
chr1	12966856	12967118	263	*	PND_Adult_NF_peak_2313	354	12.1621	37.8126	35.4387	202	Intron (ENSMUST00000188454.6/240726, intron 2 of 9)	1	12879683	12990914	111232	2	240726	ENSMUST00000146763.7	23796	ENSMUSG00000025938	Slco5a1	solute carrier organic anion transporter family, member 5A1	-23796	Slco5a1	ENSMUST00000147606.2	intronic	intronic	-0.597255	-0.955251	2.82275	0.104654	0.29953
chr1	12990266	12990562	297	*	PND_Adult_NF_peak_2316	2437	22.2024	246.952	243.749	139	Promoter	1	12879683	12990914	111232	2	240726	ENSMUST00000146763.7	352	ENSMUSG00000025938	Slco5a1	solute carrier organic anion transporter family, member 5A1	-352	Slco5a1	ENSMUST00000147606.2	exonic	proximal <=1000bp	0.102179	2.39048	0.708771	0.407363	0.639528
chr1	12991024	12991212	189	*	PND_Adult_NF_peak_2317	204	4.90081	22.6229	20.4045	108	Promoter	1	12866552	12991135	124584	2	240726	ENSMUST00000115403.8	0	ENSMUSG00000025938	Slco5a1	solute carrier organic anion transporter family, member 5A1	0	Slco5a1	ENSMUST00000115403.8	exonic	TSS	0.541048	0.316601	7.05229	0.0132098	0.08842
chr1	12992155	12992335	181	*	PND_Adult_NF_peak_2318	268	5.07549	29.138	26.8446	47	Promoter	1	12866549	12992650	126102	2	240726	ENSMUST00000188454.6	315	ENSMUSG00000025938	Slco5a1	solute carrier organic anion transporter family, member 5A1	-315	Slco5a1	ENSMUST00000188454.6	intronic	proximal <=1000bp	-0.402961	1.03631	6.86849	0.0143242	0.0928867
chr1	12992457	12992567	111	*	PND_Adult_NF_peak_2319	170	4.01105	19.1794	17.0073	64	Promoter	1	12866549	12992650	126102	2	240726	ENSMUST00000188454.6	83	ENSMUSG00000025938	Slco5a1	solute carrier organic anion transporter family, member 5A1	-83	Slco5a1	ENSMUST00000188454.6	exonic	proximal <=1000bp	-0.607446	0.57404	8.49955	0.00712691	0.0613685
chr1	12992698	12992839	142	*	PND_Adult_NF_peak_2320	393	6.04564	41.7173	39.3126	60	Promoter	1	12866549	12992650	126102	2	240726	ENSMUST00000188454.6	-48	ENSMUSG00000025938	Slco5a1	solute carrier organic anion transporter family, member 5A1	48	Slco5a1	ENSMUST00000188454.6	intergenic	proximal <=1000bp	-0.309327	0.812901	2.51271	0.124758	0.33174
chr1	12996231	12996601	371	*	PND_Adult_NF_peak_2321	1092	14.1369	112.031	109.266	242	Distal Intergenic	1	12866549	12992650	126102	2	240726	ENSMUST00000188454.6	-3581	ENSMUSG00000025938	Slco5a1	solute carrier organic anion transporter family, member 5A1	3581	Slco5a1	ENSMUST00000188454.6	intergenic	intergenic	-0.44777	0.931239	6.01765	0.0210197	0.116552
chr1	12997296	12997433	138	*	PND_Adult_NF_peak_2323	209	5.89536	23.1441	20.9176	63	Distal Intergenic	1	12866549	12992650	126102	2	240726	ENSMUST00000188454.6	-4646	ENSMUSG00000025938	Slco5a1	solute carrier organic anion transporter family, member 5A1	4646	Slco5a1	ENSMUST00000188454.6	intergenic	intergenic	0.0847615	-0.0952752	0.113836	0.738469	0.86811
chr1	13012430	13012586	157	*	PND_Adult_NF_peak_2325	53	3.306	7.27078	5.36008	96	Distal Intergenic	1	12866549	12992650	126102	2	240726	ENSMUST00000188454.6	-19780	ENSMUSG00000025938	Slco5a1	solute carrier organic anion transporter family, member 5A1	19780	Slco5a1	ENSMUST00000188454.6	intergenic	intergenic	0.0586411	0.241323	0.0694878	0.794117	0.899504
chr1	13012675	13012933	259	*	PND_Adult_NF_peak_2326	2796	33.2328	282.953	279.647	133	Distal Intergenic	1	12866549	12992650	126102	2	240726	ENSMUST00000188454.6	-20025	ENSMUSG00000025938	Slco5a1	solute carrier organic anion transporter family, member 5A1	20025	Slco5a1	ENSMUST00000188454.6	intergenic	intergenic	0.0467039	1.93454	0.0711844	0.79197	0.898356
chr1	13015318	13015494	177	*	PND_Adult_NF_peak_2327	188	5.52538	21.0668	18.8674	76	Distal Intergenic	1	12866549	12992650	126102	2	240726	ENSMUST00000188454.6	-22668	ENSMUSG00000025938	Slco5a1	solute carrier organic anion transporter family, member 5A1	22668	Slco5a1	ENSMUST00000188454.6	intergenic	intergenic	0.142122	-0.37231	0.32642	0.572574	0.764636
chr1	13019482	13019752	271	*	PND_Adult_NF_peak_2328	996	21.1504	102.425	99.6975	185	Distal Intergenic	1	12866549	12992650	126102	2	240726	ENSMUST00000188454.6	-26832	ENSMUSG00000025938	Slco5a1	solute carrier organic anion transporter family, member 5A1	26832	Slco5a1	ENSMUST00000188454.6	intergenic	intergenic	0.217617	0.507532	1.03322	0.318566	0.56012
chr1	13029052	13029606	555	*	PND_Adult_NF_peak_2329	354	12.1621	37.8126	35.4387	490	Distal Intergenic	1	12866549	12992650	126102	2	240726	ENSMUST00000188454.6	-36402	ENSMUSG00000025938	Slco5a1	solute carrier organic anion transporter family, member 5A1	-30345	RP24-178B14.2	ENSMUST00000191708.1	intergenic	intergenic	-0.0218784	0.893557	0.011947	0.913787	0.960629
chr1	13042443	13042576	134	*	PND_Adult_NF_peak_2331	249	9.72966	27.1811	24.9065	64	Distal Intergenic	1	12866549	12992650	126102	2	240726	ENSMUST00000188454.6	-49793	ENSMUSG00000025938	Slco5a1	solute carrier organic anion transporter family, member 5A1	-17375	RP24-178B14.2	ENSMUST00000191708.1	intergenic	intergenic	-0.247291	-1.42813	0.299516	0.588752	0.775431
chr1	13050248	13050429	182	*	PND_Adult_NF_peak_2332	219	7.09354	24.1664	21.9271	99	Distal Intergenic	1	12866549	12992650	126102	2	240726	ENSMUST00000188454.6	-57598	ENSMUSG00000025938	Slco5a1	solute carrier organic anion transporter family, member 5A1	-9522	RP24-178B14.2	ENSMUST00000191708.1	intergenic	intergenic	-0.15815	0.347181	0.459824	0.503567	0.714258
chr1	13050509	13050636	128	*	PND_Adult_NF_peak_2333	149	5.78256	17.119	14.9787	80	Distal Intergenic	1	12866549	12992650	126102	2	240726	ENSMUST00000188454.6	-57859	ENSMUSG00000025938	Slco5a1	solute carrier organic anion transporter family, member 5A1	-9315	RP24-178B14.2	ENSMUST00000191708.1	intergenic	intergenic	-0.508736	0.0408664	5.62269	0.0252453	0.129835
chr1	13052109	13052597	489	*	PND_Adult_NF_peak_2334	460	11.1257	48.4576	46.005	102	Distal Intergenic	1	12866549	12992650	126102	2	240726	ENSMUST00000188454.6	-59459	ENSMUSG00000025938	Slco5a1	solute carrier organic anion transporter family, member 5A1	-7354	RP24-178B14.2	ENSMUST00000191708.1	intergenic	intergenic	0.373517	0.988101	5.02389	0.0335579	0.154492
chr1	13057834	13058044	211	*	PND_Adult_NF_peak_2335	306	11.081	32.9821	30.65	110	Distal Intergenic	1	12866549	12992650	126102	2	240726	ENSMUST00000188454.6	-65184	ENSMUSG00000025938	Slco5a1	solute carrier organic anion transporter family, member 5A1	-1907	RP24-178B14.2	ENSMUST00000191708.1	intergenic	intergenic	-0.797945	-0.484203	7.1719	0.0125358	0.0857088
chr1	13069497	13069940	444	*	PND_Adult_NF_peak_2336	1044	13.5525	107.18	104.434	326	Intron (ENSMUST00000187394.1/ENSMUST00000187394.1, intron 1 of 3)	1	13113457	13127163	13707	2	383491	ENSMUST00000047577.6	57223	ENSMUSG00000042414	Prdm14	PR domain containing 14	659	RP24-178B14.1	ENSMUST00000187394.1	intronic	proximal <=1000bp	0.344952	1.84719	1.97965	0.180967	0.408824
chr1	13070946	13071257	312	*	PND_Adult_NF_peak_2337	385	7.33512	40.9731	38.5748	201	Intron (ENSMUST00000187394.1/ENSMUST00000187394.1, intron 1 of 3)	1	13113457	13127163	13707	2	383491	ENSMUST00000047577.6	55906	ENSMUSG00000042414	Prdm14	PR domain containing 14	2108	RP24-178B14.1	ENSMUST00000187394.1	intronic	intronic	0.358643	0.934971	3.09753	0.0904009	0.27558
chr1	13071424	13071614	191	*	PND_Adult_NF_peak_2338	118	3.81744	13.9015	11.8172	125	Intron (ENSMUST00000187394.1/ENSMUST00000187394.1, intron 1 of 3)	1	13113457	13127163	13707	2	383491	ENSMUST00000047577.6	55549	ENSMUSG00000042414	Prdm14	PR domain containing 14	2586	RP24-178B14.1	ENSMUST00000187394.1	intronic	intronic	1.23576	-0.388551	23.4174	4.8718e-05	0.00299032
chr1	13073885	13074004	120	*	PND_Adult_NF_peak_2339	88	3.38035	10.868	8.85172	33	Intron (ENSMUST00000187394.1/ENSMUST00000187394.1, intron 1 of 3)	1	13113457	13127163	13707	2	383491	ENSMUST00000047577.6	53159	ENSMUSG00000042414	Prdm14	PR domain containing 14	5047	RP24-178B14.1	ENSMUST00000187394.1	intronic	intronic	-0.356374	-0.840414	1.06957	0.310361	0.552265
chr1	13075921	13076273	353	*	PND_Adult_NF_peak_2340	151	4.68351	17.325	15.1822	266	Intron (ENSMUST00000187394.1/ENSMUST00000187394.1, intron 2 of 3)	1	13113457	13127163	13707	2	383491	ENSMUST00000047577.6	50890	ENSMUSG00000042414	Prdm14	PR domain containing 14	7083	RP24-178B14.1	ENSMUST00000187394.1	intronic	intronic	0.117638	0.996145	0.501235	0.48512	0.701248
chr1	13076396	13076565	170	*	PND_Adult_NF_peak_2341	446	8.69537	47.0455	44.6024	85	Exon (ENSMUST00000187394.1/ENSMUST00000187394.1, exon 3 of 4)	1	13113457	13127163	13707	2	383491	ENSMUST00000047577.6	50598	ENSMUSG00000042414	Prdm14	PR domain containing 14	7558	RP24-178B14.1	ENSMUST00000187394.1	exonic	exonic	0.183024	1.0844	1.49439	0.232266	0.470595
chr1	13079077	13079444	368	*	PND_Adult_NF_peak_2342	1358	19.1352	138.724	135.861	255	Distal Intergenic	1	13113457	13127163	13707	2	383491	ENSMUST00000047577.6	47719	ENSMUSG00000042414	Prdm14	PR domain containing 14	10239	RP24-178B14.1	ENSMUST00000187394.1	intergenic	intergenic	-0.255623	1.22896	1.69877	0.204252	0.4381
chr1	13084714	13085394	681	*	PND_Adult_NF_peak_2343	1123	18.2766	115.147	112.37	171	Distal Intergenic	1	13113457	13127163	13707	2	383491	ENSMUST00000047577.6	41769	ENSMUSG00000042414	Prdm14	PR domain containing 14	15876	RP24-178B14.1	ENSMUST00000187394.1	intergenic	intergenic	-0.171891	2.26092	1.35675	0.254502	0.495118
chr1	13095026	13095304	279	*	PND_Adult_NF_peak_2345	258	9.89071	28.0947	25.8123	153	Distal Intergenic	1	13113457	13127163	13707	2	383491	ENSMUST00000047577.6	31859	ENSMUSG00000042414	Prdm14	PR domain containing 14	26188	RP24-178B14.1	ENSMUST00000187394.1	intergenic	intergenic	-0.153757	-0.539044	0.282056	0.599767	0.782711
chr1	13095623	13095786	164	*	PND_Adult_NF_peak_2346	182	8.01149	20.421	18.2317	93	Distal Intergenic	1	13113457	13127163	13707	2	383491	ENSMUST00000047577.6	31377	ENSMUSG00000042414	Prdm14	PR domain containing 14	26785	RP24-178B14.1	ENSMUST00000187394.1	intergenic	intergenic	-0.197381	-1.15493	0.228578	0.636489	0.806804
chr1	13103529	13104371	843	*	PND_Adult_NF_peak_2347	620	11.1202	64.6405	62.0898	594	Distal Intergenic	1	13113457	13127163	13707	2	383491	ENSMUST00000047577.6	22792	ENSMUSG00000042414	Prdm14	PR domain containing 14	-22792	Prdm14	ENSMUST00000047577.6	intergenic	intergenic	-0.179249	2.00586	1.75996	0.195915	0.427761
chr1	13105154	13105261	108	*	PND_Adult_NF_peak_2348	56	3.12338	7.573	5.64629	48	Distal Intergenic	1	13113457	13127163	13707	2	383491	ENSMUST00000047577.6	21902	ENSMUSG00000042414	Prdm14	PR domain containing 14	-21902	Prdm14	ENSMUST00000047577.6	intergenic	intergenic	-0.259332	-0.226551	1.08608	0.306727	0.548634
chr1	13108792	13108912	121	*	PND_Adult_NF_peak_2349	292	7.0395	31.5963	29.2788	49	Distal Intergenic	1	13113457	13127163	13707	2	383491	ENSMUST00000047577.6	18251	ENSMUSG00000042414	Prdm14	PR domain containing 14	-18251	Prdm14	ENSMUST00000047577.6	intergenic	intergenic	0.0870324	0.908311	0.284868	0.597963	0.781553
chr1	13108988	13109231	244	*	PND_Adult_NF_peak_2350	1764	23.3191	179.495	176.496	107	Distal Intergenic	1	13113457	13127163	13707	2	383491	ENSMUST00000047577.6	17932	ENSMUSG00000042414	Prdm14	PR domain containing 14	-17932	Prdm14	ENSMUST00000047577.6	intergenic	intergenic	0.0177596	1.70638	0.0206468	0.886829	0.947559
chr1	13118540	13118630	91	*	PND_Adult_NF_peak_2352	45	3.21943	6.39785	4.51868	17	Intron (ENSMUST00000047577.6/383491, intron 6 of 7)	1	13113457	13127163	13707	2	383491	ENSMUST00000047577.6	8533	ENSMUSG00000042414	Prdm14	PR domain containing 14	-8533	Prdm14	ENSMUST00000047577.6	intronic	intronic	0.791885	-1.2136	3.49828	0.0725418	0.242637
chr1	13121753	13121966	214	*	PND_Adult_NF_peak_2353	2820	30.1691	285.314	282.001	99	Intron (ENSMUST00000047577.6/383491, intron 5 of 7)	1	13113457	13127163	13707	2	383491	ENSMUST00000047577.6	5197	ENSMUSG00000042414	Prdm14	PR domain containing 14	-5197	Prdm14	ENSMUST00000047577.6	intronic	intronic	-0.111729	1.34977	0.435181	0.515133	0.723032
chr1	13124767	13124980	214	*	PND_Adult_NF_peak_2354	54	2.88619	7.3437	5.43122	61	Intron (ENSMUST00000047577.6/383491, intron 2 of 7)	1	13113457	13127163	13707	2	383491	ENSMUST00000047577.6	2183	ENSMUSG00000042414	Prdm14	PR domain containing 14	-2183	Prdm14	ENSMUST00000047577.6	intronic	intronic	0.166248	-0.151283	0.235329	0.632737	0.804296
chr1	13127042	13127498	457	*	PND_Adult_NF_peak_2355	106	4.26	12.7125	10.651	36	Promoter	1	13113457	13127163	13707	2	383491	ENSMUST00000047577.6	0	ENSMUSG00000042414	Prdm14	PR domain containing 14	0	Prdm14	ENSMUST00000047577.6	exonic	TSS	0.0877543	1.26673	0.354393	0.556672	0.753539
chr1	13128509	13128653	145	*	PND_Adult_NF_peak_2356	200	5.76195	22.2788	20.0638	53	Distal Intergenic	1	13113457	13127163	13707	2	383491	ENSMUST00000047577.6	-1346	ENSMUSG00000042414	Prdm14	PR domain containing 14	1346	Prdm14	ENSMUST00000047577.6	intergenic	intergenic	-0.495726	0.438112	5.97889	0.0213976	0.117736
chr1	13268207	13268685	479	*	PND_Adult_NF_peak_2369	124	6.48644	14.5631	12.4648	37	Intron (ENSMUST00000081713.10/17978, intron 2 of 21)	1	13190106	13299722	109617	2	17978	ENSMUST00000145280.1	31037	ENSMUSG00000005886	Ncoa2	nuclear receptor coactivator 2	6009	Gm27881	ENSMUST00000183805.1	intronic	intronic	-0.300171	-1.16172	0.525531	0.474826	0.69342
chr1	13335949	13336168	220	*	PND_Adult_NF_peak_2371	34	3.51349	5.2676	3.43108	90	Intron (ENSMUST00000081713.10/17978, intron 1 of 21)	1	13190106	13299722	109617	2	17978	ENSMUST00000145280.1	-36227	ENSMUSG00000005886	Ncoa2	nuclear receptor coactivator 2	1340	Gm23169	ENSMUST00000157157.1	intronic	intronic	0.142737	-1.15545	0.125116	0.726341	0.861463
chr1	13360713	13361117	405	*	PND_Adult_NF_peak_2373	2644	34.5984	267.729	264.467	93	Intron (ENSMUST00000081713.10/17978, intron 1 of 21)	1	13182284	13372429	190146	2	17978	ENSMUST00000139970.7	11312	ENSMUSG00000005886	Ncoa2	nuclear receptor coactivator 2	3983	RP23-125I14.1	ENSMUST00000195718.1	intronic	intronic	0.0442537	2.23781	0.115858	0.736246	0.867002
chr1	13372391	13373301	911	*	PND_Adult_NF_peak_2375	8449	26.5219	849.844	844.913	162	Promoter	1	13182284	13372429	190146	2	17978	ENSMUST00000139970.7	0	ENSMUSG00000005886	Ncoa2	nuclear receptor coactivator 2	0	Ncoa2	ENSMUST00000139970.7	exonic	TSS	0.349801	5.07364	14.2042	0.000828848	0.016813
chr1	13373455	13373921	467	*	PND_Adult_NF_peak_2376	300	3.74706	32.395	30.0694	154	Promoter	1	13165925	13374029	208105	2	17978	ENSMUST00000143603.7	108	ENSMUSG00000005886	Ncoa2	nuclear receptor coactivator 2	-108	Ncoa2	ENSMUST00000124088.1	intronic	proximal <=1000bp	0.18044	3.00267	2.43431	0.130534	0.340069
chr1	13374024	13374188	165	*	PND_Adult_NF_peak_2377	598	5.19134	62.3445	59.8068	65	Promoter	1	13165925	13374029	208105	2	17978	ENSMUST00000143603.7	0	ENSMUSG00000005886	Ncoa2	nuclear receptor coactivator 2	0	Ncoa2	ENSMUST00000143603.7	exonic	TSS	-0.0366274	2.13792	0.0885518	0.76834	0.884799
chr1	13399812	13399923	112	*	PND_Adult_NF_peak_2379	59	3.96656	7.91759	5.98321	59	Distal Intergenic	1	13164501	13374083	209583	2	17978	ENSMUST00000147927.7	-25729	ENSMUSG00000005886	Ncoa2	nuclear receptor coactivator 2	-7732	RP23-125I14.6	ENSMUST00000187246.1	intergenic	intergenic	-0.299511	-0.512572	1.32474	0.259992	0.500957
chr1	13400306	13400474	169	*	PND_Adult_NF_peak_2380	122	5.61566	14.3362	12.2457	67	Distal Intergenic	1	13164501	13374083	209583	2	17978	ENSMUST00000147927.7	-26223	ENSMUSG00000005886	Ncoa2	nuclear receptor coactivator 2	-7181	RP23-125I14.6	ENSMUST00000187246.1	intergenic	intergenic	0.252179	0.00758558	1.39179	0.248554	0.488559
chr1	13400560	13400671	112	*	PND_Adult_NF_peak_2381	18	2.58401	3.53138	1.80543	7	Distal Intergenic	1	13164501	13374083	209583	2	17978	ENSMUST00000147927.7	-26477	ENSMUSG00000005886	Ncoa2	nuclear receptor coactivator 2	-6984	RP23-125I14.6	ENSMUST00000187246.1	intergenic	intergenic	0.52637	-0.747225	3.56769	0.0698717	0.237438
chr1	13401386	13401689	304	*	PND_Adult_NF_peak_2382	659	15.4199	68.5689	65.9971	138	Distal Intergenic	1	13164501	13374083	209583	2	17978	ENSMUST00000147927.7	-27303	ENSMUSG00000005886	Ncoa2	nuclear receptor coactivator 2	-5966	RP23-125I14.6	ENSMUST00000187246.1	intergenic	intergenic	-0.706455	0.47322	12.2368	0.00166705	0.0258132
chr1	13407711	13407978	268	*	PND_Adult_NF_peak_2383	2878	34.3106	291.19	287.861	127	Distal Intergenic	1	13164501	13374083	209583	2	17978	ENSMUST00000147927.7	-33628	ENSMUSG00000005886	Ncoa2	nuclear receptor coactivator 2	56	RP23-125I14.6	ENSMUST00000187246.1	intergenic	proximal <=1000bp	0.437864	1.45357	10.575	0.00311044	0.0373789
chr1	13411210	13411399	190	*	PND_Adult_NF_peak_2384	1272	19.3911	130.066	127.234	99	Distal Intergenic	1	13164501	13374083	209583	2	17978	ENSMUST00000147927.7	-37127	ENSMUSG00000005886	Ncoa2	nuclear receptor coactivator 2	3555	RP23-125I14.6	ENSMUST00000187246.1	intergenic	intergenic	-0.628339	0.623127	9.22059	0.00530647	0.0515845
chr1	13426497	13427297	801	*	PND_Adult_NF_peak_2385	1272	21.637	130.095	127.263	99	Distal Intergenic	1	13164501	13374083	209583	2	17978	ENSMUST00000147927.7	-52414	ENSMUSG00000005886	Ncoa2	nuclear receptor coactivator 2	18842	RP23-125I14.6	ENSMUST00000187246.1	intergenic	intergenic	-0.283146	2.69945	6.93301	0.0139216	0.0912866
chr1	13427401	13427503	103	*	PND_Adult_NF_peak_2386	24	2.69549	4.22517	2.4523	40	Distal Intergenic	1	13164501	13374083	209583	2	17978	ENSMUST00000147927.7	-53318	ENSMUSG00000005886	Ncoa2	nuclear receptor coactivator 2	19746	RP23-125I14.6	ENSMUST00000187246.1	intergenic	intergenic	-0.259703	-0.106065	1.12196	0.299028	0.541032
chr1	13487856	13488382	527	*	PND_Adult_NF_peak_2390	1350	24.708	137.87	135.01	298	Distal Intergenic	1	13576144	13579798	3655	2	72265	ENSMUST00000185447.1	91416	ENSMUSG00000025935	Tram1	translocating chain-associating membrane protein 1	80201	RP23-125I14.6	ENSMUST00000187246.1	intergenic	intergenic	0.00780681	1.81429	0.00258838	0.959805	0.982212
chr1	13494739	13495001	263	*	PND_Adult_NF_peak_2391	378	12.7026	40.2859	37.8921	209	Distal Intergenic	1	13576144	13579798	3655	2	72265	ENSMUST00000185447.1	84797	ENSMUSG00000025935	Tram1	translocating chain-associating membrane protein 1	-84797	Tram1	ENSMUST00000185447.1	intergenic	intergenic	-0.103419	0.417922	0.254464	0.618106	0.794782
chr1	13518464	13518671	208	*	PND_Adult_NF_peak_2393	48	4.05403	6.73932	4.84135	25	Distal Intergenic	1	13576144	13579798	3655	2	72265	ENSMUST00000185447.1	61127	ENSMUSG00000025935	Tram1	translocating chain-associating membrane protein 1	-61127	Tram1	ENSMUST00000185447.1	intergenic	intergenic	0.652012	-0.939246	3.03922	0.0928489	0.27968
chr1	13530845	13531032	188	*	PND_Adult_NF_peak_2394	95	4.38802	11.5758	9.54354	93	Distal Intergenic	1	13576144	13579798	3655	2	72265	ENSMUST00000185447.1	48766	ENSMUSG00000025935	Tram1	translocating chain-associating membrane protein 1	-48766	Tram1	ENSMUST00000185447.1	intergenic	intergenic	-0.492398	-0.204849	3.91598	0.0582761	0.21351
chr1	13531206	13531337	132	*	PND_Adult_NF_peak_2395	28	2.72052	4.6066	2.80427	15	Distal Intergenic	1	13576144	13579798	3655	2	72265	ENSMUST00000185447.1	48461	ENSMUSG00000025935	Tram1	translocating chain-associating membrane protein 1	-48461	Tram1	ENSMUST00000185447.1	intergenic	intergenic	-0.467021	0.112133	4.45185	0.044424	0.182012
chr1	13531598	13531783	186	*	PND_Adult_NF_peak_2396	1640	24.1143	166.961	164.002	77	Distal Intergenic	1	13576144	13579798	3655	2	72265	ENSMUST00000185447.1	48015	ENSMUSG00000025935	Tram1	translocating chain-associating membrane protein 1	-48015	Tram1	ENSMUST00000185447.1	intergenic	intergenic	-0.201638	1.05629	1.71739	0.20124	0.434386
chr1	13535061	13535168	108	*	PND_Adult_NF_peak_2397	87	4.29691	10.7225	8.71095	38	Distal Intergenic	1	13576144	13579798	3655	2	72265	ENSMUST00000185447.1	44630	ENSMUSG00000025935	Tram1	translocating chain-associating membrane protein 1	-44630	Tram1	ENSMUST00000185447.1	intergenic	intergenic	0.141821	-0.540546	0.201636	0.657043	0.819625
chr1	13535271	13535430	160	*	PND_Adult_NF_peak_2398	201	6.61149	22.3654	20.1496	51	Distal Intergenic	1	13576144	13579798	3655	2	72265	ENSMUST00000185447.1	44368	ENSMUSG00000025935	Tram1	translocating chain-associating membrane protein 1	-44368	Tram1	ENSMUST00000185447.1	intergenic	intergenic	0.155471	0.121331	0.537011	0.470088	0.689725
chr1	13589107	13589872	766	*	PND_Adult_NF_peak_2401	826	11.801	85.2753	82.6222	718	Promoter	1	13578118	13589875	11758	2	72265	ENSMUST00000188377.1	3	ENSMUSG00000025935	Tram1	translocating chain-associating membrane protein 1	-3	Tram1	ENSMUST00000188377.1	exonic	proximal <=1000bp	0.240283	2.82524	4.30548	0.0478006	0.189623
chr1	13589954	13590217	264	*	PND_Adult_NF_peak_2402	1477	17.2802	150.624	147.72	123	Promoter	1	13564698	13589910	25213	2	72265	ENSMUST00000027068.10	-44	ENSMUSG00000025935	Tram1	translocating chain-associating membrane protein 1	44	Tram1	ENSMUST00000027068.10	intergenic	proximal <=1000bp	0.109179	1.87827	0.805708	0.377451	0.613898
chr1	13590300	13590388	89	*	PND_Adult_NF_peak_2403	85	3.54761	10.5729	8.56407	42	Promoter	1	13564698	13589910	25213	2	72265	ENSMUST00000027068.10	-390	ENSMUSG00000025935	Tram1	translocating chain-associating membrane protein 1	390	Tram1	ENSMUST00000027068.10	intergenic	proximal <=1000bp	0.0170864	1.1495	0.0103063	0.9199	0.963689
chr1	13621637	13621853	217	*	PND_Adult_NF_peak_2405	205	8.64859	22.752	20.5293	140	Downstream (1-2kb)	1	13629995	13638411	8417	2	212442	ENSMUST00000156222.1	16558	ENSMUSG00000025937	Lactb2	lactamase, beta 2	-16558	Lactb2	ENSMUST00000156222.1	intergenic	intergenic	-0.0490809	0.123856	0.0477151	0.828756	0.918287
chr1	13622265	13622376	112	*	PND_Adult_NF_peak_2406	27	3.24322	4.5774	2.77599	6	Downstream (<1kb)	1	13629995	13638411	8417	2	212442	ENSMUST00000156222.1	16035	ENSMUSG00000025937	Lactb2	lactamase, beta 2	-16035	Lactb2	ENSMUST00000156222.1	intergenic	intergenic	0.22603	-0.931703	0.371016	0.547622	0.747189
chr1	13659570	13659724	155	*	PND_Adult_NF_peak_2407	45	3.33367	6.46271	4.58185	113	Promoter	1	13623330	13660546	37217	2	212442	ENSMUST00000027071.6	822	ENSMUSG00000025937	Lactb2	lactamase, beta 2	-822	Lactb2	ENSMUST00000027071.6	intronic	proximal <=1000bp	0.27401	-0.0403278	1.67651	0.206524	0.440756
chr1	13659905	13660254	350	*	PND_Adult_NF_peak_2408	320	8.7362	34.4382	32.0934	271	Promoter	1	13623330	13660546	37217	2	212442	ENSMUST00000027071.6	292	ENSMUSG00000025937	Lactb2	lactamase, beta 2	-292	Lactb2	ENSMUST00000027071.6	intronic	proximal <=1000bp	0.279774	1.23811	3.6956	0.0653346	0.228322
chr1	13660343	13660718	376	*	PND_Adult_NF_peak_2409	677	13.8825	70.3398	67.759	267	Promoter	1	13623330	13660546	37217	2	212442	ENSMUST00000027071.6	0	ENSMUSG00000025937	Lactb2	lactamase, beta 2	0	Lactb2	ENSMUST00000027071.6	exonic	TSS	0.843611	1.55911	25.9052	2.55488e-05	0.002039
chr1	13706408	13706590	183	*	PND_Adult_NF_peak_2411	670	18.6485	69.6245	67.0469	85	Distal Intergenic	1	13668771	13701723	32953	1	381246	ENSMUST00000088542.3	37637	ENSMUSG00000067813	Xkr9	X-linked Kx blood group related 9	37637	Xkr9	ENSMUST00000088542.3	intergenic	intergenic	0.825459	-0.353678	3.16081	0.0969659	0.287028
chr1	13774928	13775153	226	*	PND_Adult_NF_peak_2412	642	18.108	66.8153	64.2526	96	Distal Intergenic	1	13785883	13786879	997	2	433273	ENSMUST00000180415.1	11726	ENSMUSG00000097711	Gm5523	glyceraldehyde-3-phosphate dehydrogenase pseudogene	464	Gm26273	ENSMUST00000104180.1	intergenic	proximal <=1000bp	-0.106207	-0.616713	0.0399729	0.844318	0.926061
chr1	13789345	13789682	338	*	PND_Adult_NF_peak_2414	250	9.52878	27.3425	25.0666	94	Distal Intergenic	1	13785883	13786879	997	2	433273	ENSMUST00000180415.1	-2466	ENSMUSG00000097711	Gm5523	glyceraldehyde-3-phosphate dehydrogenase pseudogene	2466	RP23-70F22.1	ENSMUST00000180415.1	intergenic	intergenic	-0.32034	0.373523	2.87798	0.101481	0.294523
chr1	13789842	13789969	128	*	PND_Adult_NF_peak_2415	71	4.86483	9.14834	7.17275	39	Distal Intergenic	1	13785883	13786879	997	2	433273	ENSMUST00000180415.1	-2963	ENSMUSG00000097711	Gm5523	glyceraldehyde-3-phosphate dehydrogenase pseudogene	2963	RP23-70F22.1	ENSMUST00000180415.1	intergenic	intergenic	-0.315065	-0.583649	1.26062	0.271574	0.513299
chr1	13839759	13839920	162	*	PND_Adult_NF_peak_2417	572	14.9387	59.7251	57.2024	64	Distal Intergenic	1	13785883	13786879	997	2	433273	ENSMUST00000180415.1	-52880	ENSMUSG00000097711	Gm5523	glyceraldehyde-3-phosphate dehydrogenase pseudogene	-9199	RP23-74B7.1	ENSMUST00000194709.1	intergenic	intergenic	-0.516778	0.134256	5.43359	0.0275938	0.136937
chr1	13840090	13840274	185	*	PND_Adult_NF_peak_2418	84	4.84466	10.4356	8.42926	125	Distal Intergenic	1	13785883	13786879	997	2	433273	ENSMUST00000180415.1	-53211	ENSMUSG00000097711	Gm5523	glyceraldehyde-3-phosphate dehydrogenase pseudogene	-8845	RP23-74B7.1	ENSMUST00000194709.1	intergenic	intergenic	-0.220682	0.145948	0.801712	0.378619	0.614967
chr1	13843008	13843396	389	*	PND_Adult_NF_peak_2419	73	4.32156	9.28344	7.30529	135	Distal Intergenic	1	13785883	13786879	997	2	433273	ENSMUST00000180415.1	-56129	ENSMUSG00000097711	Gm5523	glyceraldehyde-3-phosphate dehydrogenase pseudogene	-5723	RP23-74B7.1	ENSMUST00000194709.1	intergenic	intergenic	0.143379	0.38275	0.485581	0.491955	0.705905
chr1	13846668	13846833	166	*	PND_Adult_NF_peak_2420	218	8.5136	24.0744	21.836	98	Distal Intergenic	1	13785883	13786879	997	2	433273	ENSMUST00000180415.1	-59789	ENSMUSG00000097711	Gm5523	glyceraldehyde-3-phosphate dehydrogenase pseudogene	-2286	RP23-74B7.1	ENSMUST00000194709.1	intergenic	intergenic	0.208689	-0.855298	0.46334	0.501954	0.713188
chr1	13858739	13859119	381	*	PND_Adult_NF_peak_2421	2889	35.2639	292.275	288.942	196	Distal Intergenic	1	13785883	13786879	997	2	433273	ENSMUST00000180415.1	-71860	ENSMUSG00000097711	Gm5523	glyceraldehyde-3-phosphate dehydrogenase pseudogene	9620	RP23-74B7.1	ENSMUST00000194709.1	intergenic	intergenic	0.077459	2.00774	0.287417	0.596339	0.780479
chr1	13881732	13882337	606	*	PND_Adult_NF_peak_2423	2539	30.8612	257.178	253.945	493	Distal Intergenic	1	13785883	13786879	997	2	433273	ENSMUST00000180415.1	-94853	ENSMUSG00000097711	Gm5523	glyceraldehyde-3-phosphate dehydrogenase pseudogene	32613	RP23-74B7.1	ENSMUST00000194709.1	intergenic	intergenic	0.144725	2.51225	1.35516	0.25472	0.495381
chr1	13915003	13915179	177	*	PND_Adult_NF_peak_2425	47	3.40801	6.6397	4.75418	159	Distal Intergenic	1	13785883	13786879	997	2	433273	ENSMUST00000180415.1	-128124	ENSMUSG00000097711	Gm5523	glyceraldehyde-3-phosphate dehydrogenase pseudogene	-17199	Gm25491	ENSMUST00000158733.1	intergenic	intergenic	-0.728119	0.325591	8.43203	0.00735466	0.0626524
chr1	13915321	13915539	219	*	PND_Adult_NF_peak_2426	3604	46.571	363.966	360.433	116	Distal Intergenic	1	13785883	13786879	997	2	433273	ENSMUST00000180415.1	-128442	ENSMUSG00000097711	Gm5523	glyceraldehyde-3-phosphate dehydrogenase pseudogene	-16839	Gm25491	ENSMUST00000158733.1	intergenic	intergenic	-0.365004	1.90719	6.21884	0.0191719	0.110484
chr1	13937173	13937503	331	*	PND_Adult_NF_peak_2428	685	17.838	71.1835	68.598	205	Distal Intergenic	1	13785883	13786879	997	2	433273	ENSMUST00000180415.1	-150294	ENSMUSG00000097711	Gm5523	glyceraldehyde-3-phosphate dehydrogenase pseudogene	4795	Gm25491	ENSMUST00000158733.1	intergenic	intergenic	0.110583	0.402506	0.277583	0.602659	0.78454
chr1	13940852	13940985	134	*	PND_Adult_NF_peak_2429	44	3.81163	6.28965	4.41331	117	Distal Intergenic	1	13785883	13786879	997	2	433273	ENSMUST00000180415.1	-153973	ENSMUSG00000097711	Gm5523	glyceraldehyde-3-phosphate dehydrogenase pseudogene	8474	Gm25491	ENSMUST00000158733.1	intergenic	intergenic	-0.566529	-1.36319	2.4419	0.129962	0.33925
chr1	14001920	14002178	259	*	PND_Adult_NF_peak_2431	143	7.02698	16.5171	14.3843	73	Distal Intergenic	1	13785883	13786879	997	2	433273	ENSMUST00000180415.1	-215041	ENSMUSG00000097711	Gm5523	glyceraldehyde-3-phosphate dehydrogenase pseudogene	69542	Gm25491	ENSMUST00000158733.1	intergenic	intergenic	0.939875	-1.07712	6.03792	0.0208249	0.115961
chr1	14097954	14098164	211	*	PND_Adult_NF_peak_2435	503	14.894	52.8377	50.3567	83	Distal Intergenic	1	14207926	14231492	23567	2	14048	ENSMUST00000189526.1	133328	ENSMUSG00000025932	Eya1	EYA transcriptional coactivator and phosphatase 1	-14655	RP24-335B5.1	ENSMUST00000193148.1	intergenic	intergenic	0.156648	0.143254	0.48236	0.493382	0.707078
chr1	14132805	14133026	222	*	PND_Adult_NF_peak_2439	249	9.72966	27.1811	24.9065	81	Distal Intergenic	1	14207926	14231492	23567	2	14048	ENSMUST00000189526.1	98466	ENSMUSG00000025932	Eya1	EYA transcriptional coactivator and phosphatase 1	19986	RP24-335B5.1	ENSMUST00000193148.1	intergenic	intergenic	0.217477	-0.799865	0.569622	0.457044	0.679654
chr1	14133244	14133385	142	*	PND_Adult_NF_peak_2440	41	3.78376	5.98892	4.12049	97	Distal Intergenic	1	14207926	14231492	23567	2	14048	ENSMUST00000189526.1	98107	ENSMUSG00000025932	Eya1	EYA transcriptional coactivator and phosphatase 1	20425	RP24-335B5.1	ENSMUST00000193148.1	intergenic	intergenic	-0.0399514	-0.793504	0.0159528	0.900442	0.954088
chr1	14186639	14186872	234	*	PND_Adult_NF_peak_2442	97	5.67564	11.7657	9.72455	139	Intron (ENSMUST00000027066.12/14048, intron 12 of 17)	1	14207926	14231492	23567	2	14048	ENSMUST00000189526.1	44620	ENSMUSG00000025932	Eya1	EYA transcriptional coactivator and phosphatase 1	4061	Gm22616	ENSMUST00000179783.1	intronic	intronic	0.645531	-1.24843	3.24886	0.0828246	0.261884
chr1	14287978	14288637	660	*	PND_Adult_NF_peak_2444	420	12.1416	44.4817	42.0568	583	Intron (ENSMUST00000027066.12/14048, intron 3 of 17)	1	14170643	14304570	133928	2	14048	ENSMUST00000190337.6	15933	ENSMUSG00000025932	Eya1	EYA transcriptional coactivator and phosphatase 1	-15933	Eya1	ENSMUST00000190337.6	intronic	intronic	-0.426899	1.70528	7.4508	0.0111059	0.0798087
chr1	14288729	14288933	205	*	PND_Adult_NF_peak_2445	189	7.41394	21.1242	18.9242	125	Intron (ENSMUST00000027066.12/14048, intron 3 of 17)	1	14170643	14304570	133928	2	14048	ENSMUST00000190337.6	15637	ENSMUSG00000025932	Eya1	EYA transcriptional coactivator and phosphatase 1	-15637	Eya1	ENSMUST00000190337.6	intronic	intronic	-0.382858	0.41132	3.43645	0.0749025	0.246979
chr1	14304622	14304806	185	*	PND_Adult_NF_peak_2446	226	9.18913	24.9415	22.6922	79	Promoter	1	14270707	14304628	33922	2	14048	ENSMUST00000185453.6	0	ENSMUSG00000025932	Eya1	EYA transcriptional coactivator and phosphatase 1	0	Eya1	ENSMUST00000185453.6	exonic	TSS	0.47919	-0.343843	4.24075	0.0493847	0.193438
chr1	14305143	14305266	124	*	PND_Adult_NF_peak_2447	76	4.12085	9.67971	7.69394	83	Promoter	1	14270707	14304628	33922	2	14048	ENSMUST00000185453.6	-515	ENSMUSG00000025932	Eya1	EYA transcriptional coactivator and phosphatase 1	515	Eya1	ENSMUST00000185453.6	intronic	proximal <=1000bp	0.0798848	-0.460058	0.0886515	0.768213	0.884704
chr1	14309603	14310320	718	*	PND_Adult_NF_peak_2448	976	18.1519	100.394	97.675	269	Promoter	1	14270775	14309836	39062	2	14048	ENSMUST00000187790.1	0	ENSMUSG00000025932	Eya1	EYA transcriptional coactivator and phosphatase 1	0	Eya1	ENSMUST00000187790.1	exonic	TSS	-0.0328533	2.03703	0.0570195	0.813102	0.909838
chr1	14363350	14363596	247	*	PND_Adult_NF_peak_2449	520	15.6756	54.5041	52.0119	156	Distal Intergenic	1	14168958	14310235	141278	2	14048	ENSMUST00000168081.8	-53115	ENSMUSG00000025932	Eya1	EYA transcriptional coactivator and phosphatase 1	53115	Eya1	ENSMUST00000168081.8	intergenic	intergenic	0.0725635	-0.00363936	0.107902	0.745119	0.872027
chr1	14391272	14391542	271	*	PND_Adult_NF_peak_2451	260	9.99993	28.3188	26.0322	87	Distal Intergenic	1	14168958	14310235	141278	2	14048	ENSMUST00000168081.8	-81037	ENSMUSG00000025932	Eya1	EYA transcriptional coactivator and phosphatase 1	81037	Eya1	ENSMUST00000168081.8	intergenic	intergenic	0.383849	-0.681043	1.4312	0.242131	0.481645
chr1	14405686	14406128	443	*	PND_Adult_NF_peak_2452	3423	44.2262	345.802	342.319	139	Distal Intergenic	1	14168958	14310235	141278	2	14048	ENSMUST00000168081.8	-95451	ENSMUSG00000025932	Eya1	EYA transcriptional coactivator and phosphatase 1	95451	Eya1	ENSMUST00000168081.8	intergenic	intergenic	0.114781	2.03015	0.851106	0.364539	0.602735
chr1	14464887	14465066	180	*	PND_Adult_NF_peak_2453	163	7.56752	18.5361	16.3714	42	Distal Intergenic	1	14168958	14310235	141278	2	14048	ENSMUST00000168081.8	-154652	ENSMUSG00000025932	Eya1	EYA transcriptional coactivator and phosphatase 1	154652	Eya1	ENSMUST00000168081.8	intergenic	intergenic	0.0739459	-0.203169	0.0639035	0.802425	0.90416
chr1	14465257	14465405	149	*	PND_Adult_NF_peak_2454	163	7.56752	18.5361	16.3714	43	Distal Intergenic	1	14168958	14310235	141278	2	14048	ENSMUST00000168081.8	-155022	ENSMUSG00000025932	Eya1	EYA transcriptional coactivator and phosphatase 1	155022	Eya1	ENSMUST00000168081.8	intergenic	intergenic	-0.427418	-0.641143	2.37227	0.135329	0.347015
chr1	14496619	14496920	302	*	PND_Adult_NF_peak_2455	6497	26.9457	654.102	649.762	130	Distal Intergenic	1	14168958	14310235	141278	2	14048	ENSMUST00000168081.8	-186384	ENSMUSG00000025932	Eya1	EYA transcriptional coactivator and phosphatase 1	186384	Eya1	ENSMUST00000168081.8	intergenic	intergenic	0.0278239	4.14148	0.0750188	0.786282	0.895188
chr1	14497946	14498210	265	*	PND_Adult_NF_peak_2456	7257	29.15	730.296	725.731	137	Distal Intergenic	1	14168958	14310235	141278	2	14048	ENSMUST00000168081.8	-187711	ENSMUSG00000025932	Eya1	EYA transcriptional coactivator and phosphatase 1	187711	Eya1	ENSMUST00000168081.8	intergenic	intergenic	-0.382008	1.58295	7.63965	0.0102394	0.0761247
chr1	14504388	14504621	234	*	PND_Adult_NF_peak_2457	221	6.39844	24.3911	22.1497	147	Distal Intergenic	1	14168958	14310235	141278	2	14048	ENSMUST00000168081.8	-194153	ENSMUSG00000025932	Eya1	EYA transcriptional coactivator and phosphatase 1	194153	Eya1	ENSMUST00000168081.8	intergenic	intergenic	0.0125061	0.0339814	0.00266328	0.959228	0.981938
chr1	14506506	14506946	441	*	PND_Adult_NF_peak_2458	481	9.9978	50.5956	48.1283	165	Distal Intergenic	1	14168958	14310235	141278	2	14048	ENSMUST00000168081.8	-196271	ENSMUSG00000025932	Eya1	EYA transcriptional coactivator and phosphatase 1	196271	Eya1	ENSMUST00000168081.8	intergenic	intergenic	-0.0266095	1.40953	0.0381437	0.84664	0.927325
chr1	14507245	14507579	335	*	PND_Adult_NF_peak_2459	88	4.01865	10.8133	8.80013	35	Distal Intergenic	1	14168958	14310235	141278	2	14048	ENSMUST00000168081.8	-197010	ENSMUSG00000025932	Eya1	EYA transcriptional coactivator and phosphatase 1	197010	Eya1	ENSMUST00000168081.8	intergenic	intergenic	0.263935	0.832379	2.75008	0.109006	0.306929
chr1	14508317	14508440	124	*	PND_Adult_NF_peak_2460	103	4.37196	12.4515	10.3993	96	Distal Intergenic	1	14168958	14310235	141278	2	14048	ENSMUST00000168081.8	-198082	ENSMUSG00000025932	Eya1	EYA transcriptional coactivator and phosphatase 1	198082	Eya1	ENSMUST00000168081.8	intergenic	intergenic	0.12833	-0.557053	0.192683	0.66424	0.824071
chr1	14508899	14509064	166	*	PND_Adult_NF_peak_2461	88	3.93202	10.8274	8.81393	84	Distal Intergenic	1	14168958	14310235	141278	2	14048	ENSMUST00000168081.8	-198664	ENSMUSG00000025932	Eya1	EYA transcriptional coactivator and phosphatase 1	198664	Eya1	ENSMUST00000168081.8	intergenic	intergenic	-0.128983	-0.648336	0.137553	0.713694	0.853752
chr1	14513573	14514109	537	*	PND_Adult_NF_peak_2462	153	7.29725	17.5188	15.3698	59	Distal Intergenic	1	14168958	14310235	141278	2	14048	ENSMUST00000168081.8	-203338	ENSMUSG00000025932	Eya1	EYA transcriptional coactivator and phosphatase 1	203338	Eya1	ENSMUST00000168081.8	intergenic	intergenic	0.393422	0.310623	2.60882	0.118471	0.321707
chr1	14551214	14551578	365	*	PND_Adult_NF_peak_2463	294	10.8107	31.8	29.4789	99	Distal Intergenic	1	14753746	14755353	1608	2	17681	ENSMUST00000190719.1	203775	ENSMUSG00000025930	Msc	musculin	-201359	RP24-356G6.1	ENSMUST00000187401.1	intergenic	intergenic	0.805989	-0.214234	10.2683	0.00350286	0.0401863
chr1	14609194	14609468	275	*	PND_Adult_NF_peak_2465	563	16.2807	58.8952	56.3768	139	Distal Intergenic	1	14753746	14755353	1608	2	17681	ENSMUST00000190719.1	145885	ENSMUSG00000025930	Msc	musculin	-143469	RP24-356G6.1	ENSMUST00000187401.1	intergenic	intergenic	-0.398535	-0.451417	1.87866	0.181951	0.410057
chr1	14616028	14616574	547	*	PND_Adult_NF_peak_2468	1701	27.0458	173.117	170.139	453	Distal Intergenic	1	14753746	14755353	1608	2	17681	ENSMUST00000190719.1	138779	ENSMUSG00000025930	Msc	musculin	-136363	RP24-356G6.1	ENSMUST00000187401.1	intergenic	intergenic	-0.295429	1.61919	4.49727	0.0434312	0.179574
chr1	14631733	14631872	140	*	PND_Adult_NF_peak_2469	124	6.48644	14.5631	12.4648	97	Distal Intergenic	1	14753746	14755353	1608	2	17681	ENSMUST00000190719.1	123481	ENSMUSG00000025930	Msc	musculin	-121065	RP24-356G6.1	ENSMUST00000187401.1	intergenic	intergenic	0.261318	-0.757716	0.774725	0.386648	0.621793
chr1	14632080	14632203	124	*	PND_Adult_NF_peak_2470	71	4.86483	9.14834	7.17275	41	Distal Intergenic	1	14753746	14755353	1608	2	17681	ENSMUST00000190719.1	123150	ENSMUSG00000025930	Msc	musculin	-120734	RP24-356G6.1	ENSMUST00000187401.1	intergenic	intergenic	0.922763	-0.849823	7.64749	0.010205	0.0759623
chr1	14687340	14687541	202	*	PND_Adult_NF_peak_2474	216	8.91886	23.8403	21.6041	64	Distal Intergenic	1	14753746	14755353	1608	2	17681	ENSMUST00000190719.1	67812	ENSMUSG00000025930	Msc	musculin	-65396	RP24-356G6.1	ENSMUST00000187401.1	intergenic	intergenic	-0.115269	-1.20361	0.117756	0.734181	0.865762
chr1	14696869	14697084	216	*	PND_Adult_NF_peak_2475	354	12.1621	37.8126	35.4387	94	Distal Intergenic	1	14753746	14755353	1608	2	17681	ENSMUST00000190719.1	58269	ENSMUSG00000025930	Msc	musculin	-55853	RP24-356G6.1	ENSMUST00000187401.1	intergenic	intergenic	0.392865	-0.922535	1.71448	0.201611	0.434824
chr1	14734061	14734566	506	*	PND_Adult_NF_peak_2480	121	6.3333	14.2604	12.171	376	Distal Intergenic	1	14753746	14755353	1608	2	17681	ENSMUST00000190719.1	20787	ENSMUSG00000025930	Msc	musculin	-18371	RP24-356G6.1	ENSMUST00000187401.1	intergenic	intergenic	0.0806049	-0.594843	0.0805175	0.778796	0.890935
chr1	14739443	14739528	86	*	PND_Adult_NF_peak_2481	40	3.48323	5.89157	4.03711	41	Distal Intergenic	1	14753746	14755353	1608	2	17681	ENSMUST00000190719.1	15825	ENSMUSG00000025930	Msc	musculin	-13409	RP24-356G6.1	ENSMUST00000187401.1	intergenic	intergenic	0.179607	-1.47574	0.125016	0.72656	0.861584
chr1	14739681	14740048	368	*	PND_Adult_NF_peak_2482	184	7.39485	20.5958	18.4046	59	Distal Intergenic	1	14753746	14755353	1608	2	17681	ENSMUST00000190719.1	15305	ENSMUSG00000025930	Msc	musculin	-12889	RP24-356G6.1	ENSMUST00000187401.1	intergenic	intergenic	-0.22326	0.578179	1.61265	0.215125	0.450803
chr1	14740138	14740333	196	*	PND_Adult_NF_peak_2483	1239	25.6966	126.769	123.949	76	Distal Intergenic	1	14753746	14755353	1608	2	17681	ENSMUST00000190719.1	15020	ENSMUSG00000025930	Msc	musculin	-12604	RP24-356G6.1	ENSMUST00000187401.1	intergenic	intergenic	-0.712479	0.245741	9.74212	0.00430722	0.0454315
chr1	14755117	14756001	885	*	PND_Adult_NF_peak_2485	629	10.5182	65.5064	62.9508	285	Promoter	1	14753746	14755353	1608	2	17681	ENSMUST00000190719.1	0	ENSMUSG00000025930	Msc	musculin	0	Msc	ENSMUST00000190719.1	exonic	TSS	-0.100701	2.68552	0.629216	0.434667	0.661825
chr1	14756943	14757104	162	*	PND_Adult_NF_peak_2486	218	5.71475	24.1132	21.8744	52	Promoter	1	14753346	14755990	2645	2	17681	ENSMUST00000027062.6	-953	ENSMUSG00000025930	Msc	musculin	951	Msc	ENSMUST00000190471.1	exonic	proximal <=1000bp	-0.17704	0.502277	0.560003	0.461062	0.683021
chr1	14757211	14757357	147	*	PND_Adult_NF_peak_2487	77	3.52546	9.77557	7.78796	93	Exon (ENSMUST00000067599.1/ENSMUST00000067599.1, exon 1 of 1)	1	14753346	14755990	2645	2	17681	ENSMUST00000027062.6	-1221	ENSMUSG00000025930	Msc	musculin	1219	Msc	ENSMUST00000190471.1	exonic	exonic	0.054684	0.163149	0.0738771	0.787873	0.896006
chr1	14787410	14787621	212	*	PND_Adult_NF_peak_2488	312	10.763	33.5653	31.2288	108	Distal Intergenic	1	14753346	14755990	2645	2	17681	ENSMUST00000027062.6	-31420	ENSMUSG00000025930	Msc	musculin	-1024	RP23-398C14.1	ENSMUST00000194866.1	intergenic	intergenic	0.188655	-1.05964	0.264905	0.611023	0.790181
chr1	14788259	14788456	198	*	PND_Adult_NF_peak_2489	1477	30.6769	150.673	147.769	81	Distal Intergenic	1	14753346	14755990	2645	2	17681	ENSMUST00000027062.6	-32269	ENSMUSG00000025930	Msc	musculin	-189	RP23-398C14.1	ENSMUST00000194866.1	intergenic	proximal <=1000bp	0.111095	0.427633	0.31502	0.579318	0.769484
chr1	14793698	14793888	191	*	PND_Adult_NF_peak_2490	1676	31.9542	170.655	167.684	103	Distal Intergenic	1	14753346	14755990	2645	2	17681	ENSMUST00000027062.6	-37708	ENSMUSG00000025930	Msc	musculin	5053	RP23-398C14.1	ENSMUST00000194866.1	intergenic	intergenic	-0.955988	0.446106	14.9952	0.000638205	0.0143532
chr1	14797979	14798191	213	*	PND_Adult_NF_peak_2491	252	8.83757	27.5121	25.2348	79	Distal Intergenic	1	14753346	14755990	2645	2	17681	ENSMUST00000027062.6	-41989	ENSMUSG00000025930	Msc	musculin	9334	RP23-398C14.1	ENSMUST00000194866.1	intergenic	intergenic	-0.769265	-0.691958	6.06736	0.0205455	0.115027
chr1	14798396	14798482	87	*	PND_Adult_NF_peak_2492	41	3.53795	6.00169	4.13292	64	Distal Intergenic	1	14753346	14755990	2645	2	17681	ENSMUST00000027062.6	-42406	ENSMUSG00000025930	Msc	musculin	9751	RP23-398C14.1	ENSMUST00000194866.1	intergenic	intergenic	-0.753087	-1.56503	2.39107	0.133855	0.344939
chr1	14840096	14840312	217	*	PND_Adult_NF_peak_2494	712	19.4593	73.8848	71.2856	127	Exon (ENSMUST00000121569.1/ENSMUST00000121569.1, exon 1 of 1)	1	14873506	14918835	45330	2	277328	ENSMUST00000235071.1	78523	ENSMUSG00000032769	Trpa1	transient receptor potential cation channel, subfamily A, member 1	0	Smt3h2-ps4	ENSMUST00000121569.1	exonic	TSS	-0.0952731	0.410793	0.248067	0.622536	0.797556
chr1	14864935	14865082	148	*	PND_Adult_NF_peak_2495	48	4.05403	6.73932	4.84135	44	Exon (ENSMUST00000121367.1/ENSMUST00000121367.1, exon 1 of 1)	1	14873506	14918835	45330	2	277328	ENSMUST00000235071.1	53753	ENSMUSG00000032769	Trpa1	transient receptor potential cation channel, subfamily A, member 1	0	Rpl5-ps1	ENSMUST00000121367.1	exonic	TSS	0.830148	-1.20297	5.45917	0.0272625	0.135969
chr1	14918013	14918171	159	*	PND_Adult_NF_peak_2496	179	6.61037	20.1192	17.9331	87	Promoter	1	14873506	14918835	45330	2	277328	ENSMUST00000235071.1	664	ENSMUSG00000032769	Trpa1	transient receptor potential cation channel, subfamily A, member 1	-691	Trpa1	ENSMUST00000041447.4	intronic	proximal <=1000bp	-0.0952511	-0.518564	0.125035	0.726426	0.861497
chr1	14918645	14919029	385	*	PND_Adult_NF_peak_2497	520	12.6074	54.562	52.0695	193	Promoter	1	14873506	14918835	45330	2	277328	ENSMUST00000235071.1	0	ENSMUSG00000032769	Trpa1	transient receptor potential cation channel, subfamily A, member 1	0	Trpa1	ENSMUST00000041447.4	exonic	TSS	-0.109401	1.09915	0.526283	0.474513	0.693188
chr1	14919373	14919542	170	*	PND_Adult_NF_peak_2498	82	4.46827	10.2339	8.23125	109	Promoter	1	14872648	14918862	46215	2	277328	ENSMUST00000041447.4	-511	ENSMUSG00000032769	Trpa1	transient receptor potential cation channel, subfamily A, member 1	511	Trpa1	ENSMUST00000041447.4	intergenic	proximal <=1000bp	-0.263711	0.0631834	1.11316	0.300893	0.542974
chr1	14919907	14920020	114	*	PND_Adult_NF_peak_2499	245	7.88489	26.775	24.5066	47	Distal Intergenic	1	14872648	14918862	46215	2	277328	ENSMUST00000041447.4	-1045	ENSMUSG00000032769	Trpa1	transient receptor potential cation channel, subfamily A, member 1	1045	Trpa1	ENSMUST00000041447.4	intergenic	intergenic	-0.244224	0.159319	1.07673	0.308779	0.550647
chr1	14932329	14932593	265	*	PND_Adult_NF_peak_2500	216	8.91886	23.8403	21.6041	89	Distal Intergenic	1	14872648	14918862	46215	2	277328	ENSMUST00000041447.4	-13467	ENSMUSG00000032769	Trpa1	transient receptor potential cation channel, subfamily A, member 1	13467	Trpa1	ENSMUST00000041447.4	intergenic	intergenic	-0.0832307	-0.875349	0.0788152	0.781083	0.892267
chr1	15136069	15136212	144	*	PND_Adult_NF_peak_2509	283	10.5405	30.6286	28.3187	73	Distal Intergenic	1	15287254	15712548	425295	1	98741	ENSMUST00000175681.2	-151042	ENSMUSG00000092083	Kcnb2	potassium voltage gated channel, Shab-related subfamily, member 2	116910	Gm26345	ENSMUST00000157534.1	intergenic	intergenic	-0.153359	-0.055395	0.48653	0.491536	0.705641
chr1	15136338	15136529	192	*	PND_Adult_NF_peak_2510	173	7.83778	19.5687	17.3886	134	Distal Intergenic	1	15287254	15712548	425295	1	98741	ENSMUST00000175681.2	-150725	ENSMUSG00000092083	Kcnb2	potassium voltage gated channel, Shab-related subfamily, member 2	117179	Gm26345	ENSMUST00000157534.1	intergenic	intergenic	-0.0221828	0.108394	0.011614	0.914989	0.961116
chr1	15146027	15146371	345	*	PND_Adult_NF_peak_2511	1001	23.2777	102.91	100.181	116	Distal Intergenic	1	15287254	15712548	425295	1	98741	ENSMUST00000175681.2	-140883	ENSMUSG00000092083	Kcnb2	potassium voltage gated channel, Shab-related subfamily, member 2	-123426	RP23-143L15.1	ENSMUST00000086739.5	intergenic	intergenic	0.258842	1.02558	1.63813	0.212242	0.447339
chr1	15146455	15146536	82	*	PND_Adult_NF_peak_2512	48	3.91329	6.73978	4.84179	58	Distal Intergenic	1	15287254	15712548	425295	1	98741	ENSMUST00000175681.2	-140718	ENSMUSG00000092083	Kcnb2	potassium voltage gated channel, Shab-related subfamily, member 2	-123261	RP23-143L15.1	ENSMUST00000086739.5	intergenic	intergenic	0.355783	-0.33568	1.43501	0.241631	0.481101
chr1	15152413	15152734	322	*	PND_Adult_NF_peak_2513	684	18.9188	71.0384	68.4536	181	Distal Intergenic	1	15287254	15712548	425295	1	98741	ENSMUST00000175681.2	-134520	ENSMUSG00000092083	Kcnb2	potassium voltage gated channel, Shab-related subfamily, member 2	-117063	RP23-143L15.1	ENSMUST00000086739.5	intergenic	intergenic	0.497352	0.352547	6.41208	0.0175641	0.104832
chr1	15202484	15202832	349	*	PND_Adult_NF_peak_2514	585	16.9255	61.0608	58.5303	215	Distal Intergenic	1	15287254	15712548	425295	1	98741	ENSMUST00000175681.2	-84422	ENSMUSG00000092083	Kcnb2	potassium voltage gated channel, Shab-related subfamily, member 2	-66965	RP23-143L15.1	ENSMUST00000086739.5	intergenic	intergenic	-0.826207	0.0102345	10.5948	0.00308681	0.0371909
chr1	15219499	15219973	475	*	PND_Adult_NF_peak_2515	184	8.10805	20.6158	18.4212	115	Distal Intergenic	1	15287254	15712548	425295	1	98741	ENSMUST00000175681.2	-67281	ENSMUSG00000092083	Kcnb2	potassium voltage gated channel, Shab-related subfamily, member 2	-49824	RP23-143L15.1	ENSMUST00000086739.5	intergenic	intergenic	0.294133	0.358531	2.12869	0.156281	0.37642
chr1	15220312	15220577	266	*	PND_Adult_NF_peak_2516	63	4.59456	8.32052	6.36926	159	Distal Intergenic	1	15287254	15712548	425295	1	98741	ENSMUST00000175681.2	-66677	ENSMUSG00000092083	Kcnb2	potassium voltage gated channel, Shab-related subfamily, member 2	-49220	RP23-143L15.1	ENSMUST00000086739.5	intergenic	intergenic	0.549309	-0.753626	2.29461	0.14197	0.356604
chr1	15286377	15287110	734	*	PND_Adult_NF_peak_2520	695	13.3019	72.1693	69.5792	459	Promoter	1	15287254	15712548	425295	1	98741	ENSMUST00000175681.2	-144	ENSMUSG00000092083	Kcnb2	potassium voltage gated channel, Shab-related subfamily, member 2	-144	Kcnb2	ENSMUST00000175681.2	intergenic	proximal <=1000bp	-0.131961	2.22873	1.17951	0.287208	0.529486
chr1	15287413	15287550	138	*	PND_Adult_NF_peak_2521	99	4.43642	12.0199	9.97462	40	Promoter	1	15287254	15712548	425295	1	98741	ENSMUST00000175681.2	159	ENSMUSG00000092083	Kcnb2	potassium voltage gated channel, Shab-related subfamily, member 2	159	Kcnb2	ENSMUST00000175681.2	exonic	proximal <=1000bp	0.0478605	0.29185	0.0631261	0.803554	0.90463
chr1	15312569	15313248	680	*	PND_Adult_NF_peak_2523	157	7.27401	17.9441	15.79	50	Promoter	1	15312452	15723750	411299	1	98741	ENSMUST00000170146.2	117	ENSMUSG00000092083	Kcnb2	potassium voltage gated channel, Shab-related subfamily, member 2	117	Kcnb2	ENSMUST00000170146.2	exonic	proximal <=1000bp	0.181213	1.48335	1.81653	0.189102	0.419266
chr1	15313336	15313522	187	*	PND_Adult_NF_peak_2524	282	10.2129	30.5511	28.2439	121	Promoter	1	15312452	15723750	411299	1	98741	ENSMUST00000170146.2	884	ENSMUSG00000092083	Kcnb2	potassium voltage gated channel, Shab-related subfamily, member 2	884	Kcnb2	ENSMUST00000170146.2	intronic	proximal <=1000bp	-0.17285	0.184976	0.641277	0.430349	0.658514
chr1	15423678	15424194	517	*	PND_Adult_NF_peak_2531	3166	36.7445	320.026	316.615	157	Intron (ENSMUST00000175681.2/98741, intron 2 of 2)	1	15312452	15723750	411299	1	98741	ENSMUST00000170146.2	111226	ENSMUSG00000092083	Kcnb2	potassium voltage gated channel, Shab-related subfamily, member 2	59376	RP23-445B17.1	ENSMUST00000193873.1	intronic	intronic	-0.269534	2.23374	5.0906	0.0324963	0.151597
chr1	15427378	15427488	111	*	PND_Adult_NF_peak_2532	137	5.07132	15.8727	13.7524	67	Intron (ENSMUST00000175681.2/98741, intron 2 of 2)	1	15312452	15723750	411299	1	98741	ENSMUST00000170146.2	114926	ENSMUSG00000092083	Kcnb2	potassium voltage gated channel, Shab-related subfamily, member 2	63076	RP23-445B17.1	ENSMUST00000193873.1	intronic	intronic	0.153393	-1.37568	0.155854	0.696153	0.843559
chr1	15553822	15553982	161	*	PND_Adult_NF_peak_2539	467	14.5945	49.2202	46.762	68	Intron (ENSMUST00000175681.2/98741, intron 2 of 2)	1	15312452	15723750	411299	1	98741	ENSMUST00000170146.2	241370	ENSMUSG00000092083	Kcnb2	potassium voltage gated channel, Shab-related subfamily, member 2	-2267	RP24-66C10.4	ENSMUST00000194564.1	intronic	intronic	-0.876037	-0.165481	8.33109	0.0077041	0.0644385
chr1	15634861	15635047	187	*	PND_Adult_NF_peak_2541	741	19.9999	76.755	74.1417	79	Intron (ENSMUST00000175681.2/98741, intron 2 of 2)	1	15805646	15844052	38407	1	21749	ENSMUST00000188371.6	-170599	ENSMUSG00000025925	Terf1	telomeric repeat binding factor 1	-50999	Gm25227	ENSMUST00000158204.1	intronic	intronic	0.272125	-0.384967	1.11949	0.299549	0.541586
chr1	15643965	15644498	534	*	PND_Adult_NF_peak_2543	730	18.3461	75.6663	73.0584	436	Intron (ENSMUST00000175681.2/98741, intron 2 of 2)	1	15805646	15844052	38407	1	21749	ENSMUST00000188371.6	-161148	ENSMUSG00000025925	Terf1	telomeric repeat binding factor 1	-41548	Gm25227	ENSMUST00000158204.1	intronic	intronic	-0.248183	1.14112	2.30521	0.140746	0.354875
chr1	15651009	15651450	442	*	PND_Adult_NF_peak_2544	710	17.1483	73.6711	71.0734	246	Intron (ENSMUST00000175681.2/98741, intron 2 of 2)	1	15805646	15844052	38407	1	21749	ENSMUST00000188371.6	-154196	ENSMUSG00000025925	Terf1	telomeric repeat binding factor 1	-34596	Gm25227	ENSMUST00000158204.1	intronic	intronic	-0.159914	0.819847	0.646258	0.428585	0.65717
chr1	15651735	15652030	296	*	PND_Adult_NF_peak_2545	110	5.58345	13.1072	11.0397	231	Intron (ENSMUST00000175681.2/98741, intron 2 of 2)	1	15805646	15844052	38407	1	21749	ENSMUST00000188371.6	-153616	ENSMUSG00000025925	Terf1	telomeric repeat binding factor 1	-34016	Gm25227	ENSMUST00000158204.1	intronic	intronic	0.342608	-0.0577168	1.91275	0.178167	0.405437
chr1	15659349	15660079	731	*	PND_Adult_NF_peak_2546	389	11.9282	41.3052	38.9047	585	Intron (ENSMUST00000175681.2/98741, intron 2 of 2)	1	15805646	15844052	38407	1	21749	ENSMUST00000188371.6	-145567	ENSMUSG00000025925	Terf1	telomeric repeat binding factor 1	-25967	Gm25227	ENSMUST00000158204.1	intronic	intronic	-0.206139	1.41633	1.49302	0.232474	0.470835
chr1	15710334	15710445	112	*	PND_Adult_NF_peak_2548	33	3.34759	5.18264	3.3619	89	Exon (ENSMUST00000175681.2/98741, exon 3 of 3)	1	15805646	15844052	38407	1	21749	ENSMUST00000188371.6	-95201	ENSMUSG00000025925	Terf1	telomeric repeat binding factor 1	24288	Gm25227	ENSMUST00000158204.1	exonic	exonic	-0.542087	-0.981631	1.55987	0.22299	0.460067
chr1	15710807	15710905	99	*	PND_Adult_NF_peak_2549	40	3.62888	5.94367	4.08768	55	Exon (ENSMUST00000175681.2/98741, exon 3 of 3)	1	15805646	15844052	38407	1	21749	ENSMUST00000188371.6	-94741	ENSMUSG00000025925	Terf1	telomeric repeat binding factor 1	24761	Gm25227	ENSMUST00000158204.1	exonic	exonic	0.455191	-0.494624	2.82595	0.104467	0.299213
chr1	15710988	15711181	194	*	PND_Adult_NF_peak_2550	188	7.81228	21.016	18.8171	69	Exon (ENSMUST00000175681.2/98741, exon 3 of 3)	1	15805646	15844052	38407	1	21749	ENSMUST00000188371.6	-94465	ENSMUSG00000025925	Terf1	telomeric repeat binding factor 1	24942	Gm25227	ENSMUST00000158204.1	exonic	exonic	0.470791	0.0662303	5.3154	0.029184	0.141819
chr1	15711356	15711500	145	*	PND_Adult_NF_peak_2551	44	3.8044	6.27608	4.40008	34	Exon (ENSMUST00000175681.2/98741, exon 3 of 3)	1	15805646	15844052	38407	1	21749	ENSMUST00000188371.6	-94146	ENSMUSG00000025925	Terf1	telomeric repeat binding factor 1	25310	Gm25227	ENSMUST00000158204.1	exonic	exonic	0.0837404	-0.89668	0.062633	0.804306	0.905118
chr1	15711876	15712159	284	*	PND_Adult_NF_peak_2552	147	6.98032	16.8811	14.7438	220	3' UTR	1	15805646	15844052	38407	1	21749	ENSMUST00000188371.6	-93487	ENSMUSG00000025925	Terf1	telomeric repeat binding factor 1	25830	Gm25227	ENSMUST00000158204.1	exonic	exonic	0.229454	-0.804819	0.582458	0.452071	0.675942
chr1	15791681	15791946	266	*	PND_Adult_NF_peak_2558	432	11.8276	45.7306	43.2967	136	Distal Intergenic	1	15805646	15844052	38407	1	21749	ENSMUST00000188371.6	-13700	ENSMUSG00000025925	Terf1	telomeric repeat binding factor 1	-13700	Terf1	ENSMUST00000188371.6	intergenic	intergenic	0.307331	-0.565757	0.878633	0.357098	0.596218
chr1	15793159	15793321	163	*	PND_Adult_NF_peak_2560	54	3.81922	7.32925	5.41712	107	Distal Intergenic	1	15805646	15844052	38407	1	21749	ENSMUST00000188371.6	-12325	ENSMUSG00000025925	Terf1	telomeric repeat binding factor 1	-12325	Terf1	ENSMUST00000188371.6	intergenic	intergenic	-0.216337	-0.0502389	0.945673	0.33959	0.580065
chr1	15793416	15793623	208	*	PND_Adult_NF_peak_2561	348	10.2209	37.2403	34.872	80	Distal Intergenic	1	15805646	15844052	38407	1	21749	ENSMUST00000188371.6	-12023	ENSMUSG00000025925	Terf1	telomeric repeat binding factor 1	-12023	Terf1	ENSMUST00000188371.6	intergenic	intergenic	-0.290356	0.36702	1.94633	0.174532	0.400686
chr1	15805391	15806384	994	*	PND_Adult_NF_peak_2563	6048	27.8704	609.066	604.853	175	Promoter	1	15805646	15844052	38407	1	21749	ENSMUST00000188371.6	0	ENSMUSG00000025925	Terf1	telomeric repeat binding factor 1	0	Terf1	ENSMUST00000188371.6	exonic	TSS	0.386359	4.83168	21.0567	9.50149e-05	0.00454908
chr1	15841186	15841309	124	*	PND_Adult_NF_peak_2564	249	9.72966	27.1811	24.9065	80	Intron (ENSMUST00000188371.6/21749, intron 9 of 9)	1	15807641	15822103	14463	1	21749	ENSMUST00000188684.1	33545	ENSMUSG00000025925	Terf1	telomeric repeat binding factor 1	-12022	RP23-325F17.4	ENSMUST00000194867.1	intronic	intronic	0.690262	-1.22353	3.68229	0.0657909	0.229175
chr1	15883256	15883369	114	*	PND_Adult_NF_peak_2565	63	3.70483	8.33864	6.38698	62	Intron (ENSMUST00000040695.4/226866, intron 2 of 4)	1	15853862	15892722	38861	2	226866	ENSMUST00000040695.4	9353	ENSMUSG00000032719	Sbspon	somatomedin B and thrombospondin, type 1 domain containing	3726	Gm23259	ENSMUST00000158318.1	intronic	intronic	0.0850344	0.319952	0.184157	0.671283	0.828489
chr1	15883469	15884109	641	*	PND_Adult_NF_peak_2566	2092	29.1419	212.365	209.264	283	Exon (ENSMUST00000040695.4/226866, exon 2 of 5)	1	15853862	15892722	38861	2	226866	ENSMUST00000040695.4	8613	ENSMUSG00000032719	Sbspon	somatomedin B and thrombospondin, type 1 domain containing	3939	Gm23259	ENSMUST00000158318.1	exonic	exonic	-0.120354	2.64697	0.917552	0.346751	0.586706
chr1	15892339	15893030	692	*	PND_Adult_NF_peak_2567	843	16.6664	86.9908	84.3296	212	Promoter	1	15853862	15892722	38861	2	226866	ENSMUST00000040695.4	0	ENSMUSG00000032719	Sbspon	somatomedin B and thrombospondin, type 1 domain containing	0	Sbspon	ENSMUST00000040695.4	exonic	TSS	-0.0241788	2.26094	0.0440446	0.835371	0.921788
chr1	15902517	15902703	187	*	PND_Adult_NF_peak_2568	237	8.21962	26.0556	23.7936	132	Distal Intergenic	1	15853862	15892722	38861	2	226866	ENSMUST00000040695.4	-9795	ENSMUSG00000032719	Sbspon	somatomedin B and thrombospondin, type 1 domain containing	9795	Sbspon	ENSMUST00000040695.4	intergenic	intergenic	-0.160961	-0.613112	0.348046	0.560203	0.756125
chr1	15907310	15907529	220	*	PND_Adult_NF_peak_2569	1530	26.3091	155.993	153.071	118	Distal Intergenic	1	15853862	15892722	38861	2	226866	ENSMUST00000040695.4	-14588	ENSMUSG00000032719	Sbspon	somatomedin B and thrombospondin, type 1 domain containing	14588	Sbspon	ENSMUST00000040695.4	intergenic	intergenic	-0.30818	0.970727	2.63549	0.116302	0.318438
chr1	15921892	15922096	205	*	PND_Adult_NF_peak_2571	1929	37.0554	195.986	192.935	126	Distal Intergenic	1	15853862	15892722	38861	2	226866	ENSMUST00000040695.4	-29170	ENSMUSG00000032719	Sbspon	somatomedin B and thrombospondin, type 1 domain containing	29170	Sbspon	ENSMUST00000040695.4	intergenic	intergenic	-0.49407	0.380978	6.5066	0.0168322	0.102261
chr1	15985827	15986186	360	*	PND_Adult_NF_peak_2573	173	7.83778	19.5687	17.3886	304	Distal Intergenic	1	15853862	15892722	38861	2	226866	ENSMUST00000040695.4	-93105	ENSMUSG00000032719	Sbspon	somatomedin B and thrombospondin, type 1 domain containing	-67149	RP24-178O17.1	ENSMUST00000185778.1	intergenic	intergenic	0.686414	-0.906541	3.98898	0.0561306	0.208767
chr1	16015039	16015210	172	*	PND_Adult_NF_peak_2575	2095	39.3201	212.692	209.59	101	Distal Intergenic	1	16065979	16081212	15234	2	75799	ENSMUST00000115367.7	66002	ENSMUSG00000067795	4930444P10Rik	RIKEN cDNA 4930444P10 gene	-38125	RP24-178O17.1	ENSMUST00000185778.1	intergenic	intergenic	0.14094	0.389747	0.460097	0.503441	0.714152
chr1	16062054	16062178	125	*	PND_Adult_NF_peak_2577	670	18.6485	69.6245	67.0469	61	Distal Intergenic	1	16065979	16081212	15234	2	75799	ENSMUST00000115367.7	19034	ENSMUSG00000067795	4930444P10Rik	RIKEN cDNA 4930444P10 gene	8719	RP24-178O17.1	ENSMUST00000185778.1	intergenic	intergenic	-0.0530995	-0.596006	0.038171	0.846586	0.927302
chr1	16068478	16068824	347	*	PND_Adult_NF_peak_2578	880	19.3057	90.7371	88.0595	245	Exon (ENSMUST00000115367.7/75799, exon 3 of 4)	1	16065979	16081212	15234	2	75799	ENSMUST00000115367.7	12388	ENSMUSG00000067795	4930444P10Rik	RIKEN cDNA 4930444P10 gene	-12388	AC162442.2	ENSMUST00000115367.7	exonic	exonic	0.0340452	0.629927	0.0138108	0.907746	0.957635
chr1	16086970	16087799	830	*	PND_Adult_NF_peak_2580	118	5.44022	13.9224	11.8378	780	Intron (ENSMUST00000145070.7/75799, intron 1 of 5)	1	16065979	16093325	27347	2	75799	ENSMUST00000145070.7	5526	ENSMUSG00000067795	4930444P10Rik	RIKEN cDNA 4930444P10 gene	-5526	AC162442.2	ENSMUST00000151004.1	intronic	intronic	0.862917	-1.10251	5.95062	0.0216781	0.118635
chr1	16092874	16093532	659	*	PND_Adult_NF_peak_2581	2085	18.9776	211.696	208.597	476	Promoter	1	16065979	16093325	27347	2	75799	ENSMUST00000145070.7	0	ENSMUSG00000067795	4930444P10Rik	RIKEN cDNA 4930444P10 gene	0	AC162442.2	ENSMUST00000145070.7	exonic	TSS	0.311186	3.35333	5.82533	0.0232831	0.123738
chr1	16093639	16094235	597	*	PND_Adult_NF_peak_2582	291	5.51573	31.4908	29.1742	380	Promoter	1	16065979	16093325	27347	2	75799	ENSMUST00000151004.1	-314	ENSMUSG00000067795	4930444P10Rik	RIKEN cDNA 4930444P10 gene	314	AC162442.2	ENSMUST00000145070.7	intergenic	proximal <=1000bp	0.640728	2.28143	27.9968	1.46059e-05	0.00144046
chr1	16098861	16099128	268	*	PND_Adult_NF_peak_2583	843	15.3606	86.9985	84.3373	103	Downstream (2-3kb)	1	16101295	16102082	788	2	19989	ENSMUST00000140597.7	2954	ENSMUSG00000043716	Rpl7	ribosomal protein L7	-2954	Rpl7	ENSMUST00000140597.7	intergenic	intergenic	0.660976	0.709843	11.4141	0.00226086	0.0310199
chr1	16104115	16104548	434	*	PND_Adult_NF_peak_2584	580	6.51719	60.5482	58.0204	304	Promoter	1	16101780	16104227	2448	2	19989	ENSMUST00000149566.1	0	ENSMUSG00000043716	Rpl7	ribosomal protein L7	0	Rpl7	ENSMUST00000149566.1	exonic	TSS	0.663824	2.82387	38.7531	1.25385e-06	0.000317412
chr1	16104635	16105416	782	*	PND_Adult_NF_peak_2585	2077	14.0796	210.855	207.759	95	Promoter	1	16101295	16104662	3368	2	19989	ENSMUST00000058437.13	0	ENSMUSG00000043716	Rpl7	ribosomal protein L7	0	Rpl7	ENSMUST00000058437.13	exonic	TSS	0.268569	3.80328	7.8765	0.00925553	0.0717734
chr1	16105813	16105942	130	*	PND_Adult_NF_peak_2586	26	1.98043	4.48038	2.69828	7	Promoter	1	16105774	16133734	27961	1	98711	ENSMUST00000027053.7	39	ENSMUSG00000025921	Rdh10	retinol dehydrogenase 10 (all-trans)	39	Rdh10	ENSMUST00000027053.7	exonic	proximal <=1000bp	-0.194017	0.798639	1.23014	0.277314	0.519341
chr1	16106058	16106262	205	*	PND_Adult_NF_peak_2587	130	3.23753	15.1831	13.0762	133	Promoter	1	16105774	16133734	27961	1	98711	ENSMUST00000027053.7	284	ENSMUSG00000025921	Rdh10	retinol dehydrogenase 10 (all-trans)	284	Rdh10	ENSMUST00000027053.7	exonic	proximal <=1000bp	-0.0541176	1.48801	0.127594	0.723761	0.860066
chr1	16106630	16106812	183	*	PND_Adult_NF_peak_2588	849	8.19082	87.6632	84.9992	107	Promoter	1	16105774	16133734	27961	1	98711	ENSMUST00000027053.7	856	ENSMUSG00000025921	Rdh10	retinol dehydrogenase 10 (all-trans)	856	Rdh10	ENSMUST00000027053.7	intronic	proximal <=1000bp	0.206329	1.72829	1.93228	0.176041	0.402733
chr1	16107028	16107124	97	*	PND_Adult_NF_peak_2589	56	2.41287	7.56459	5.63807	52	Intron (ENSMUST00000027053.7/98711, intron 1 of 5)	1	16105774	16133734	27961	1	98711	ENSMUST00000027053.7	1254	ENSMUSG00000025921	Rdh10	retinol dehydrogenase 10 (all-trans)	1254	Rdh10	ENSMUST00000027053.7	intronic	intronic	-0.108505	-0.557556	0.143184	0.708142	0.850565
chr1	16116199	16116360	162	*	PND_Adult_NF_peak_2590	441	14.054	46.6254	44.1848	100	Intron (ENSMUST00000027053.7/98711, intron 2 of 5)	1	16105774	16133734	27961	1	98711	ENSMUST00000027053.7	10425	ENSMUSG00000025921	Rdh10	retinol dehydrogenase 10 (all-trans)	10425	Rdh10	ENSMUST00000027053.7	intronic	intronic	-0.484386	0.0451075	4.87613	0.0360492	0.161315
chr1	16125166	16125391	226	*	PND_Adult_NF_peak_2591	533	15.9458	55.8439	53.3435	74	Intron (ENSMUST00000027053.7/98711, intron 2 of 5)	1	16130502	16132547	2046	1	98711	ENSMUST00000152626.1	-5111	ENSMUSG00000025921	Rdh10	retinol dehydrogenase 10 (all-trans)	-5111	Rdh10	ENSMUST00000152626.1	intronic	intronic	0.451227	-0.283537	2.83495	0.103943	0.298403
chr1	16131220	16131480	261	*	PND_Adult_NF_peak_2593	863	19.3257	89.0611	86.3908	93	Promoter	1	16130502	16132547	2046	1	98711	ENSMUST00000152626.1	718	ENSMUSG00000025921	Rdh10	retinol dehydrogenase 10 (all-trans)	718	Rdh10	ENSMUST00000152626.1	exonic	proximal <=1000bp	0.0832777	0.313245	0.10119	0.753129	0.87627
chr1	16136636	16137027	392	*	PND_Adult_NF_peak_2594	97	5.67564	11.7657	9.72455	121	Distal Intergenic	1	16130502	16132547	2046	1	98711	ENSMUST00000152626.1	6134	ENSMUSG00000025921	Rdh10	retinol dehydrogenase 10 (all-trans)	6134	Rdh10	ENSMUST00000152626.1	intergenic	intergenic	-0.0654165	-0.724434	0.0310492	0.86151	0.934729
chr1	16154814	16154940	127	*	PND_Adult_NF_peak_2595	83	4.17275	10.3924	8.38688	40	Distal Intergenic	1	16130502	16132547	2046	1	98711	ENSMUST00000152626.1	24312	ENSMUSG00000025921	Rdh10	retinol dehydrogenase 10 (all-trans)	24312	Rdh10	ENSMUST00000152626.1	intergenic	intergenic	-0.467712	-1.307	1.55902	0.222694	0.459689
chr1	16157085	16157268	184	*	PND_Adult_NF_peak_2596	752	12.8794	77.8551	75.2369	88	Distal Intergenic	1	16130502	16132547	2046	1	98711	ENSMUST00000152626.1	26583	ENSMUSG00000025921	Rdh10	retinol dehydrogenase 10 (all-trans)	26583	Rdh10	ENSMUST00000152626.1	intergenic	intergenic	0.114048	0.0450413	0.188207	0.667949	0.826474
chr1	16158805	16158886	82	*	PND_Adult_NF_peak_2597	95	4.0782	11.5583	9.52631	44	Distal Intergenic	1	16130502	16132547	2046	1	98711	ENSMUST00000152626.1	28303	ENSMUSG00000025921	Rdh10	retinol dehydrogenase 10 (all-trans)	28303	Rdh10	ENSMUST00000152626.1	intergenic	intergenic	-0.308339	-0.657625	1.07094	0.310057	0.551991
chr1	16159057	16159379	323	*	PND_Adult_NF_peak_2598	534	10.1411	55.9832	53.482	205	Distal Intergenic	1	16130502	16132547	2046	1	98711	ENSMUST00000152626.1	28555	ENSMUSG00000025921	Rdh10	retinol dehydrogenase 10 (all-trans)	28555	Rdh10	ENSMUST00000152626.1	intergenic	intergenic	-0.302491	1.26107	3.76766	0.0629255	0.223094
chr1	16159662	16159772	111	*	PND_Adult_NF_peak_2599	138	4.78778	16.0201	13.8979	60	Distal Intergenic	1	16130502	16132547	2046	1	98711	ENSMUST00000152626.1	29160	ENSMUSG00000025921	Rdh10	retinol dehydrogenase 10 (all-trans)	29160	Rdh10	ENSMUST00000152626.1	intergenic	intergenic	-0.073976	0.49851	0.139519	0.711722	0.852587
chr1	16160160	16160338	179	*	PND_Adult_NF_peak_2600	797	13.3432	82.3918	79.7519	96	Distal Intergenic	1	16130502	16132547	2046	1	98711	ENSMUST00000152626.1	29658	ENSMUSG00000025921	Rdh10	retinol dehydrogenase 10 (all-trans)	29658	Rdh10	ENSMUST00000152626.1	intergenic	intergenic	-0.0909414	0.884426	0.286484	0.596933	0.78089
chr1	16172055	16172266	212	*	PND_Adult_NF_peak_2602	234	8.51529	25.6849	23.4289	131	Distal Intergenic	1	16130502	16132547	2046	1	98711	ENSMUST00000152626.1	41553	ENSMUSG00000025921	Rdh10	retinol dehydrogenase 10 (all-trans)	-38251	RP24-178O17.2	ENSMUST00000192560.1	intergenic	intergenic	-0.0207469	-0.142244	0.00708557	0.933547	0.970188
chr1	16172465	16172868	404	*	PND_Adult_NF_peak_2603	262	9.05103	28.5613	26.2727	126	Distal Intergenic	1	16130502	16132547	2046	1	98711	ENSMUST00000152626.1	41963	ENSMUSG00000025921	Rdh10	retinol dehydrogenase 10 (all-trans)	-37649	RP24-178O17.2	ENSMUST00000192560.1	intergenic	intergenic	0.068763	1.04639	0.175944	0.678254	0.832915
chr1	16177607	16177952	346	*	PND_Adult_NF_peak_2604	294	10.8107	31.8	29.4789	221	Distal Intergenic	1	16130502	16132547	2046	1	98711	ENSMUST00000152626.1	47105	ENSMUSG00000025921	Rdh10	retinol dehydrogenase 10 (all-trans)	-32565	RP24-178O17.2	ENSMUST00000192560.1	intergenic	intergenic	0.102269	-0.171945	0.202225	0.656576	0.819287
chr1	16186594	16186809	216	*	PND_Adult_NF_peak_2605	378	12.7026	40.2859	37.8921	80	Distal Intergenic	1	16130502	16132547	2046	1	98711	ENSMUST00000152626.1	56092	ENSMUSG00000025921	Rdh10	retinol dehydrogenase 10 (all-trans)	-23708	RP24-178O17.2	ENSMUST00000192560.1	intergenic	intergenic	0.407472	-0.928721	2.07646	0.161264	0.383319
chr1	16214952	16215347	396	*	PND_Adult_NF_peak_2608	3440	40.3164	347.502	344.014	229	Distal Intergenic	1	16130502	16132547	2046	1	98711	ENSMUST00000152626.1	84450	ENSMUSG00000025921	Rdh10	retinol dehydrogenase 10 (all-trans)	4435	RP24-178O17.2	ENSMUST00000192560.1	intergenic	intergenic	-0.103794	2.02047	0.546578	0.466198	0.686888
chr1	16228017	16228239	223	*	PND_Adult_NF_peak_2609	712	19.4593	73.8848	71.2856	109	Downstream (<1kb)	1	16130502	16132547	2046	1	98711	ENSMUST00000152626.1	97515	ENSMUSG00000025921	Rdh10	retinol dehydrogenase 10 (all-trans)	-267	RP24-73D23.1	ENSMUST00000186343.1	intergenic	proximal <=1000bp	-0.0502093	0.0532378	0.0413377	0.840436	0.924009
chr1	16228324	16228469	146	*	PND_Adult_NF_peak_2610	134	6.75671	15.5317	13.4158	79	Downstream (<1kb)	1	16130502	16132547	2046	1	98711	ENSMUST00000152626.1	97822	ENSMUSG00000025921	Rdh10	retinol dehydrogenase 10 (all-trans)	-37	RP24-73D23.1	ENSMUST00000186343.1	intergenic	proximal <=1000bp	-0.463199	-0.51299	2.84968	0.103093	0.297054
chr1	16241027	16241305	279	*	PND_Adult_NF_peak_2612	467	14.5945	49.2202	46.762	175	Intron (ENSMUST00000186343.1/ENSMUST00000186343.1, intron 1 of 2)	1	16130502	16132547	2046	1	98711	ENSMUST00000152626.1	110525	ENSMUSG00000025921	Rdh10	retinol dehydrogenase 10 (all-trans)	-12287	AC167117.2	ENSMUST00000161626.1	intronic	intronic	0.554862	-0.498765	4.22435	0.0497953	0.194383
chr1	16295021	16295262	242	*	PND_Adult_NF_peak_2613	86	5.28296	10.6357	8.62576	146	Intron (ENSMUST00000162751.7/29819, intron 12 of 13)	1	16344198	16375395	31198	2	29819	ENSMUST00000115360.7	80133	ENSMUSG00000025920	Stau2	staufen double-stranded RNA binding protein 2	41392	AC167117.2	ENSMUST00000159190.1	intronic	intronic	-0.407557	-0.49648	2.3892	0.134	0.345163
chr1	16295434	16295673	240	*	PND_Adult_NF_peak_2614	421	13.4317	44.6003	42.1746	128	Intron (ENSMUST00000162751.7/29819, intron 12 of 13)	1	16344198	16375395	31198	2	29819	ENSMUST00000115360.7	79722	ENSMUSG00000025920	Stau2	staufen double-stranded RNA binding protein 2	41805	AC167117.2	ENSMUST00000159190.1	intronic	intronic	-0.162939	-0.37525	0.285882	0.597326	0.781134
chr1	16303440	16303630	191	*	PND_Adult_NF_peak_2616	318	11.3513	34.1747	31.8318	102	Intron (ENSMUST00000162751.7/29819, intron 12 of 13)	1	16344198	16375395	31198	2	29819	ENSMUST00000115360.7	71765	ENSMUSG00000025920	Stau2	staufen double-stranded RNA binding protein 2	49811	AC167117.2	ENSMUST00000159190.1	intronic	intronic	0.22672	-0.632056	0.693367	0.412441	0.643572
chr1	16400340	16400535	196	*	PND_Adult_NF_peak_2621	391	12.9729	41.5363	39.1328	98	Intron (ENSMUST00000162751.7/29819, intron 5 of 13)	1	16344198	16375395	31198	2	29819	ENSMUST00000115360.7	-24945	ENSMUSG00000025920	Stau2	staufen double-stranded RNA binding protein 2	24945	Stau2	ENSMUST00000115360.7	intronic	intronic	0.573315	-0.648682	3.37695	0.0773178	0.2514
chr1	16440352	16440562	211	*	PND_Adult_NF_peak_2622	271	10.2702	29.4681	27.1697	98	5' UTR	1	16344198	16375395	31198	2	29819	ENSMUST00000115360.7	-64957	ENSMUSG00000025920	Stau2	staufen double-stranded RNA binding protein 2	64957	Stau2	ENSMUST00000115360.7	exonic	exonic	-0.405763	-1.05204	1.04268	0.316402	0.558069
chr1	16489033	16489146	114	*	PND_Adult_NF_peak_2625	365	12.0693	38.9508	36.5691	45	Intron (ENSMUST00000162751.7/29819, intron 2 of 13)	1	16343407	16519211	175805	2	29819	ENSMUST00000159558.7	30065	ENSMUSG00000025920	Stau2	staufen double-stranded RNA binding protein 2	-30065	Stau2	ENSMUST00000159558.7	intronic	intronic	-0.166147	-0.913394	0.225888	0.638472	0.808073
chr1	16491253	16491557	305	*	PND_Adult_NF_peak_2626	695	19.0175	72.094	69.5043	83	Intron (ENSMUST00000162751.7/29819, intron 2 of 13)	1	16343407	16519211	175805	2	29819	ENSMUST00000159558.7	27654	ENSMUSG00000025920	Stau2	staufen double-stranded RNA binding protein 2	-27654	Stau2	ENSMUST00000159558.7	intronic	intronic	0.23037	0.501554	1.4531	0.238653	0.477823
chr1	16510194	16510378	185	*	PND_Adult_NF_peak_2628	106	5.9459	12.6794	10.6183	85	Intron (ENSMUST00000162751.7/29819, intron 1 of 13)	1	16343407	16519211	175805	2	29819	ENSMUST00000159558.7	8833	ENSMUSG00000025920	Stau2	staufen double-stranded RNA binding protein 2	-8833	Stau2	ENSMUST00000159558.7	intronic	intronic	0.274504	-0.97738	0.673768	0.419042	0.649229
chr1	16518570	16519506	937	*	PND_Adult_NF_peak_2629	836	12.2018	86.3392	83.6812	599	Promoter	1	16343407	16519211	175805	2	29819	ENSMUST00000159558.7	0	ENSMUSG00000025920	Stau2	staufen double-stranded RNA binding protein 2	0	Stau2	ENSMUST00000159558.7	exonic	TSS	0.257909	2.49785	4.58454	0.0415922	0.175125
chr1	16519731	16520129	399	*	PND_Adult_NF_peak_2630	524	9.12977	54.9945	52.4996	133	Promoter	1	16460213	16520020	59808	2	29819	ENSMUST00000144138.3	0	ENSMUSG00000025920	Stau2	staufen double-stranded RNA binding protein 2	0	Stau2	ENSMUST00000144138.3	exonic	TSS	0.306689	1.74211	4.87745	0.0360259	0.16124
chr1	16533245	16533442	198	*	PND_Adult_NF_peak_2633	205	8.64859	22.752	20.5293	54	Distal Intergenic	1	16228816	16520112	291297	2	29819	ENSMUST00000162435.7	-13133	ENSMUSG00000025920	Stau2	staufen double-stranded RNA binding protein 2	13133	Stau2	ENSMUST00000162435.7	intergenic	intergenic	-0.963789	-1.19529	5.95142	0.0216701	0.118599
chr1	16534286	16534451	166	*	PND_Adult_NF_peak_2635	63	4.59456	8.32052	6.36926	46	Distal Intergenic	1	16228816	16520112	291297	2	29819	ENSMUST00000162435.7	-14174	ENSMUSG00000025920	Stau2	staufen double-stranded RNA binding protein 2	14174	Stau2	ENSMUST00000162435.7	intergenic	intergenic	-0.272954	-1.2077	0.590536	0.448986	0.673469
chr1	16540191	16540382	192	*	PND_Adult_NF_peak_2636	359	12.0911	38.3308	35.9534	81	Downstream (<1kb)	1	16228816	16520112	291297	2	29819	ENSMUST00000162435.7	-20079	ENSMUSG00000025920	Stau2	staufen double-stranded RNA binding protein 2	20079	Stau2	ENSMUST00000162435.7	intergenic	intergenic	-0.214172	-0.906206	0.456401	0.505146	0.715431
chr1	16554035	16554214	180	*	PND_Adult_NF_peak_2638	456	14.0694	48.1094	45.6588	85	Intron (ENSMUST00000182554.8/66799, intron 5 of 6)	1	16564338	16585398	21061	2	66799	ENSMUST00000182080.1	31184	ENSMUSG00000025939	Ube2w	ubiquitin-conjugating enzyme E2W (putative)	-31184	Ube2w	ENSMUST00000182080.1	intronic	intronic	0.287763	-0.888017	0.929299	0.343734	0.583783
chr1	16555828	16556131	304	*	PND_Adult_NF_peak_2639	164	7.3482	18.5714	16.4062	73	Intron (ENSMUST00000182554.8/66799, intron 5 of 6)	1	16564338	16585398	21061	2	66799	ENSMUST00000182080.1	29267	ENSMUSG00000025939	Ube2w	ubiquitin-conjugating enzyme E2W (putative)	-29267	Ube2w	ENSMUST00000182080.1	intronic	intronic	0.0297553	-0.541841	0.0108889	0.917675	0.962498
chr1	16587656	16587792	137	*	PND_Adult_NF_peak_2640	163	7.56752	18.5361	16.3714	81	Intron (ENSMUST00000182554.8/66799, intron 3 of 6)	1	16564338	16585398	21061	2	66799	ENSMUST00000182080.1	-2258	ENSMUSG00000025939	Ube2w	ubiquitin-conjugating enzyme E2W (putative)	2258	Ube2w	ENSMUST00000182080.1	intronic	intronic	-0.461053	-0.931434	1.64555	0.21064	0.445479
chr1	16608291	16608441	151	*	PND_Adult_NF_peak_2644	290	10.0338	31.3624	29.0468	74	Intron (ENSMUST00000182554.8/66799, intron 1 of 6)	1	16581936	16619259	37324	2	66799	ENSMUST00000133639.1	10818	ENSMUSG00000025939	Ube2w	ubiquitin-conjugating enzyme E2W (putative)	-10119	RP23-382H8.2	ENSMUST00000195710.1	intronic	intronic	0.12038	-0.544091	0.184661	0.670861	0.828318
chr1	16611090	16611349	260	*	PND_Adult_NF_peak_2645	106	5.76237	12.709	10.6475	164	Intron (ENSMUST00000182554.8/66799, intron 1 of 6)	1	16581936	16619259	37324	2	66799	ENSMUST00000133639.1	7910	ENSMUSG00000025939	Ube2w	ubiquitin-conjugating enzyme E2W (putative)	-7211	RP23-382H8.2	ENSMUST00000195710.1	intronic	intronic	0.980966	-0.592581	14.5886	0.000726362	0.015546
chr1	16618629	16619714	1086	*	PND_Adult_NF_peak_2646	4462	26.7097	449.979	446.206	771	Promoter	1	16581936	16619259	37324	2	66799	ENSMUST00000133639.1	0	ENSMUSG00000025939	Ube2w	ubiquitin-conjugating enzyme E2W (putative)	0	Ube2w	ENSMUST00000133639.1	exonic	TSS	0.388997	4.25443	17.9705	0.000240728	0.00789408
chr1	16631898	16632057	160	*	PND_Adult_NF_peak_2647	330	10.7493	35.4072	33.0536	78	Distal Intergenic	1	16569782	16619489	49708	2	66799	ENSMUST00000117146.8	-12409	ENSMUSG00000025939	Ube2w	ubiquitin-conjugating enzyme E2W (putative)	12409	Ube2w	ENSMUST00000117146.7	intergenic	intergenic	0.572773	-0.0366928	7.004	0.013493	0.0895207
chr1	16632178	16632500	323	*	PND_Adult_NF_peak_2648	318	10.5065	34.2389	31.8955	256	Distal Intergenic	1	16569782	16619489	49708	2	66799	ENSMUST00000117146.8	-12689	ENSMUSG00000025939	Ube2w	ubiquitin-conjugating enzyme E2W (putative)	12689	Ube2w	ENSMUST00000117146.7	intergenic	intergenic	0.104395	0.38006	0.317267	0.577976	0.768504
chr1	16656479	16657605	1127	*	PND_Adult_NF_peak_2650	4965	20.3728	500.482	496.569	587	Promoter	1	16643472	16656625	13154	2	67923	ENSMUST00000186701.1	0	ENSMUSG00000079658	Eloc	elongin C	0	Eloc	ENSMUST00000186701.1	exonic	TSS	0.273608	5.40254	11.8535	0.00191948	0.0280602
chr1	16665011	16665704	694	*	PND_Adult_NF_peak_2651	2168	22.1999	219.958	216.834	164	Promoter	1	16665207	16678195	12989	1	70397	ENSMUST00000177501.1	0	ENSMUSG00000025940	Tmem70	transmembrane protein 70	0	Tmem70	ENSMUST00000177501.1	exonic	TSS	0.371317	3.19815	11.8943	0.00189071	0.0278084
chr1	16668020	16668160	141	*	PND_Adult_NF_peak_2652	80	3.41059	10.074	8.07413	104	Intron (ENSMUST00000177501.1/70397, intron 2 of 2)	1	16665236	16665811	576	1	70397	ENSMUST00000176451.1	2784	ENSMUSG00000025940	Tmem70	transmembrane protein 70	2784	Tmem70	ENSMUST00000176451.1	intronic	intronic	0.470545	-0.943364	2.11354	0.157708	0.378334
chr1	16668274	16668424	151	*	PND_Adult_NF_peak_2653	364	7.07228	38.8663	36.4851	79	Intron (ENSMUST00000177501.1/70397, intron 2 of 2)	1	16665236	16665811	576	1	70397	ENSMUST00000176451.1	3038	ENSMUSG00000025940	Tmem70	transmembrane protein 70	3038	Tmem70	ENSMUST00000176451.1	intronic	intronic	0.736556	-0.299176	10.0703	0.00378454	0.0420695
chr1	16682332	16682567	236	*	PND_Adult_NF_peak_2654	71	4.86483	9.14834	7.17275	104	Distal Intergenic	1	16688051	16691947	3897	1	17087	ENSMUST00000191260.1	-5484	ENSMUSG00000025779	Ly96	lymphocyte antigen 96	-5484	Ly96	ENSMUST00000191260.1	intergenic	intergenic	0.539848	-1.03725	2.87214	0.101811	0.295024
chr1	16687782	16688218	437	*	PND_Adult_NF_peak_2656	185	6.34638	20.7398	18.5438	337	Promoter	1	16688051	16691947	3897	1	17087	ENSMUST00000191260.1	0	ENSMUSG00000025779	Ly96	lymphocyte antigen 96	0	Ly96	ENSMUST00000191260.1	exonic	TSS	0.45551	0.866651	6.04942	0.0207152	0.115581
chr1	16688364	16688460	97	*	PND_Adult_NF_peak_2657	152	5.71983	17.3495	15.2063	43	Promoter	1	16688433	16709611	21179	1	17087	ENSMUST00000026881.10	0	ENSMUSG00000025779	Ly96	lymphocyte antigen 96	0	Ly96	ENSMUST00000026881.10	exonic	TSS	-0.171881	0.684055	0.713833	0.405715	0.638157
chr1	16688612	16689021	410	*	PND_Adult_NF_peak_2658	817	16.0551	84.4141	81.7647	113	Promoter	1	16688508	16709537	21030	1	17087	ENSMUST00000190366.1	104	ENSMUSG00000025779	Ly96	lymphocyte antigen 96	104	Ly96	ENSMUST00000190366.1	exonic	proximal <=1000bp	-0.2153	1.60234	2.00926	0.167958	0.39233
chr1	16723677	16723841	165	*	PND_Adult_NF_peak_2659	55	4.32429	7.51705	5.59157	57	Distal Intergenic	1	16688508	16709537	21030	1	17087	ENSMUST00000190366.1	35169	ENSMUSG00000025779	Ly96	lymphocyte antigen 96	-34782	RP23-470P10.1	ENSMUST00000185649.1	intergenic	intergenic	0.729837	-0.677348	6.44948	0.0172705	0.10376
chr1	16723934	16724027	94	*	PND_Adult_NF_peak_2660	97	5.67564	11.7657	9.72455	65	Distal Intergenic	1	16688508	16709537	21030	1	17087	ENSMUST00000190366.1	35426	ENSMUSG00000025779	Ly96	lymphocyte antigen 96	-34596	RP23-470P10.1	ENSMUST00000185649.1	intergenic	intergenic	0.809447	-0.466503	5.45935	0.0284083	0.139504
chr1	16724139	16724324	186	*	PND_Adult_NF_peak_2661	163	7.56752	18.5361	16.3714	54	Distal Intergenic	1	16688508	16709537	21030	1	17087	ENSMUST00000190366.1	35631	ENSMUSG00000025779	Ly96	lymphocyte antigen 96	-34299	RP23-470P10.1	ENSMUST00000185649.1	intergenic	intergenic	0.326538	-0.625421	1.75854	0.19609	0.427926
chr1	16758322	16758589	268	*	PND_Adult_NF_peak_2662	205	8.64859	22.752	20.5293	62	Exon (ENSMUST00000185649.1/ENSMUST00000185649.1, exon 1 of 1)	1	16688508	16709537	21030	1	17087	ENSMUST00000190366.1	69814	ENSMUSG00000025779	Ly96	lymphocyte antigen 96	-34	RP23-470P10.1	ENSMUST00000185649.1	exonic	proximal <=1000bp	-0.236704	-0.326264	0.611762	0.441068	0.667066
chr1	16798278	16798595	318	*	PND_Adult_NF_peak_2663	952	19.7664	97.998	95.2892	160	Distal Intergenic	1	16688508	16709537	21030	1	17087	ENSMUST00000190366.1	109770	ENSMUSG00000025779	Ly96	lymphocyte antigen 96	28140	RP23-470P10.2	ENSMUST00000071842.9	intergenic	intergenic	-0.059874	1.11494	0.138171	0.713053	0.853413
chr1	16916334	16916650	317	*	PND_Adult_NF_peak_2669	813	21.3512	84.0313	81.3835	90	Intron (ENSMUST00000186604.1/ENSMUST00000186604.1, intron 1 of 2)	1	16964560	17004219	39660	2	57339	ENSMUST00000186024.1	87569	ENSMUSG00000042686	Jph1	junctophilin 1	-14320	RP24-254D14.1	ENSMUST00000194790.1	intronic	intronic	0.378645	0.214577	3.39173	0.0767093	0.250336
chr1	17030458	17030723	266	*	PND_Adult_NF_peak_2674	642	18.108	66.8153	64.2526	184	Intron (ENSMUST00000186604.1/ENSMUST00000186604.1, intron 1 of 2)	1	16964560	17004219	39660	2	57339	ENSMUST00000186024.1	-26239	ENSMUSG00000042686	Jph1	junctophilin 1	26239	Jph1	ENSMUST00000186024.1	intronic	intronic	-0.215113	-0.00414013	0.893671	0.352999	0.592531
chr1	17091460	17092078	619	*	PND_Adult_NF_peak_2676	260	8.07989	28.3233	26.0367	502	Exon (ENSMUST00000186604.1/ENSMUST00000186604.1, exon 3 of 3)	1	16994938	17097889	102952	2	57339	ENSMUST00000038382.4	5811	ENSMUSG00000042686	Jph1	junctophilin 1	-5811	Jph1	ENSMUST00000038382.4	exonic	exonic	-0.0506562	1.70891	0.16111	0.691345	0.840724
chr1	17096720	17098156	1437	*	PND_Adult_NF_peak_2677	2119	18.6539	215.049	211.94	1207	Promoter	1	16994938	17097889	102952	2	57339	ENSMUST00000038382.4	0	ENSMUSG00000042686	Jph1	junctophilin 1	0	Jph1	ENSMUST00000038382.4	exonic	TSS	0.432627	3.97264	26.5283	2.12347e-05	0.00181473
chr1	17122922	17123033	112	*	PND_Adult_NF_peak_2679	424	5.28873	44.8289	42.4018	52	Distal Intergenic	1	17145362	17164271	18910	1	14545	ENSMUST00000026879.7	-22329	ENSMUSG00000025777	Gdap1	ganglioside-induced differentiation-associated-protein 1	-1714	RP23-110G23.2	ENSMUST00000188872.1	intergenic	intergenic	0.708768	0.924582	19.1845	0.000165641	0.00630339
chr1	17123541	17123830	290	*	PND_Adult_NF_peak_2680	303	4.47571	32.6347	30.3072	213	Distal Intergenic	1	17145362	17164271	18910	1	14545	ENSMUST00000026879.7	-21532	ENSMUSG00000025777	Gdap1	ganglioside-induced differentiation-associated-protein 1	-917	RP23-110G23.2	ENSMUST00000188872.1	intergenic	proximal <=1000bp	0.505536	2.02105	16.873	0.000340857	0.0097655
chr1	17124482	17124839	358	*	PND_Adult_NF_peak_2681	9130	36.9785	918.134	913.001	145	Exon (ENSMUST00000188872.1/ENSMUST00000188872.1, exon 1 of 2)	1	17145362	17164271	18910	1	14545	ENSMUST00000026879.7	-20523	ENSMUSG00000025777	Gdap1	ganglioside-induced differentiation-associated-protein 1	0	RP23-110G23.2	ENSMUST00000188872.1	exonic	TSS	0.652719	4.37417	40.6876	8.43395e-07	0.000247286
chr1	17145271	17145751	481	*	PND_Adult_NF_peak_2684	2747	31.8743	278.019	274.727	71	Promoter	1	17145362	17164271	18910	1	14545	ENSMUST00000026879.7	0	ENSMUSG00000025777	Gdap1	ganglioside-induced differentiation-associated-protein 1	0	Gdap1	ENSMUST00000026879.7	exonic	TSS	0.113328	3.05658	0.920261	0.346052	0.586016
chr1	17150766	17151206	441	*	PND_Adult_NF_peak_2685	184	8.10805	20.6158	18.4212	291	Intron (ENSMUST00000026879.7/14545, intron 2 of 5)	1	17145468	17161631	16164	1	14545	ENSMUST00000189736.1	5298	ENSMUSG00000025777	Gdap1	ganglioside-induced differentiation-associated-protein 1	5298	Gdap1	ENSMUST00000189736.1	intronic	intronic	0.858768	0.0178024	15.8689	0.000472652	0.0119348
chr1	17207499	17207785	287	*	PND_Adult_NF_peak_2689	294	10.8107	31.8	29.4789	139	Distal Intergenic	1	17145468	17161631	16164	1	14545	ENSMUST00000189736.1	62031	ENSMUSG00000025777	Gdap1	ganglioside-induced differentiation-associated-protein 1	39096	RP24-317E22.1	ENSMUST00000187817.1	intergenic	intergenic	0.640906	-0.212346	6.90205	0.0141132	0.0920755
chr1	17373996	17374320	325	*	PND_Adult_NF_peak_2692	441	14.054	46.6254	44.1848	196	Distal Intergenic	1	17601901	17630939	29039	1	94227	ENSMUST00000088476.3	-227581	ENSMUSG00000067780	Pi15	peptidase inhibitor 15	-20638	RP23-215C21.1	ENSMUST00000188959.1	intergenic	intergenic	0.149919	-0.248229	0.382841	0.541353	0.742639
chr1	17449342	17449596	255	*	PND_Adult_NF_peak_2694	294	10.8107	31.8	29.4789	87	Distal Intergenic	1	17601901	17630939	29039	1	94227	ENSMUST00000088476.3	-152305	ENSMUSG00000067780	Pi15	peptidase inhibitor 15	19814	RP23-215C21.3	ENSMUST00000186816.1	intergenic	intergenic	0.300972	-0.493652	1.16257	0.29062	0.532857
chr1	17482837	17483624	788	*	PND_Adult_NF_peak_2695	342	11.6114	36.6566	34.2923	402	Distal Intergenic	1	17601901	17630939	29039	1	94227	ENSMUST00000088476.3	-118277	ENSMUSG00000067780	Pi15	peptidase inhibitor 15	-36377	Gm25166	ENSMUST00000158909.1	intergenic	intergenic	0.372517	1.51152	6.87555	0.0142795	0.0927348
chr1	17489318	17489837	520	*	PND_Adult_NF_peak_2696	161	7.19816	18.259	16.1011	291	Distal Intergenic	1	17601901	17630939	29039	1	94227	ENSMUST00000088476.3	-112064	ENSMUSG00000067780	Pi15	peptidase inhibitor 15	-30164	Gm25166	ENSMUST00000158909.1	intergenic	intergenic	-0.0430282	0.398279	0.056723	0.813579	0.910116
chr1	17489920	17490107	188	*	PND_Adult_NF_peak_2697	1036	23.9875	106.4	103.658	99	Distal Intergenic	1	17601901	17630939	29039	1	94227	ENSMUST00000088476.3	-111794	ENSMUSG00000067780	Pi15	peptidase inhibitor 15	-29894	Gm25166	ENSMUST00000158909.1	intergenic	intergenic	-0.197073	0.428903	0.986149	0.32964	0.570612
chr1	17647437	17647669	233	*	PND_Adult_NF_peak_2702	1647	34.9247	167.742	164.781	117	Distal Intergenic	1	17601901	17630939	29039	1	94227	ENSMUST00000088476.3	45536	ENSMUSG00000067780	Pi15	peptidase inhibitor 15	6356	RP23-329F7.2	ENSMUST00000186267.1	intergenic	intergenic	0.185839	0.764804	1.11987	0.29947	0.541504
chr1	17655719	17656004	286	*	PND_Adult_NF_peak_2703	1077	25.8522	110.519	107.759	152	Distal Intergenic	1	17601901	17630939	29039	1	94227	ENSMUST00000088476.3	53818	ENSMUSG00000067780	Pi15	peptidase inhibitor 15	14638	RP23-329F7.2	ENSMUST00000186267.1	intergenic	intergenic	0.0730221	0.226443	0.101871	0.752091	0.875723
chr1	17727130	17727884	755	*	PND_Adult_NF_peak_2708	996	18.5331	102.358	99.6311	230	Promoter	1	17724984	17727255	2272	2	102634913	ENSMUST00000149914.1	0	ENSMUSG00000085125	Gm16070	predicted gene 16070	0	AC104917.1	ENSMUST00000149914.1	exonic	TSS	0.138941	2.30487	1.30854	0.262856	0.503844
chr1	17734300	17734536	237	*	PND_Adult_NF_peak_2709	153	7.29725	17.5188	15.3698	117	Intron (ENSMUST00000159958.7/83691, intron 2 of 14)	1	17692904	17727646	34743	2	102634913	ENSMUST00000127328.1	-6654	ENSMUSG00000085125	Gm16070	predicted gene 16070	6654	AC104917.1	ENSMUST00000127328.1	intronic	intronic	0.449595	-0.606602	1.99365	0.169561	0.394382
chr1	18016389	18016626	238	*	PND_Adult_NF_peak_2716	2177	37.9419	220.855	217.729	88	Intron (ENSMUST00000209898.1/ENSMUST00000209898.1, intron 1 of 2)	1	18115204	18137051	21848	2	78081	ENSMUST00000115340.7	120425	ENSMUSG00000025774	Crisp4	cysteine-rich secretory protein 4	203	RP24-571A14.2	ENSMUST00000185773.1	intronic	proximal <=1000bp	0.441071	0.828886	7.69857	0.0099844	0.0750896
chr1	18057163	18057276	114	*	PND_Adult_NF_peak_2717	160	5.34214	18.1713	16.0145	43	Intron (ENSMUST00000209405.1/ENSMUST00000209405.1, intron 1 of 3)	1	18115204	18137051	21848	2	78081	ENSMUST00000115340.7	79775	ENSMUSG00000025774	Crisp4	cysteine-rich secretory protein 4	-993	RP24-571A14.5	ENSMUST00000188360.1	intronic	proximal <=1000bp	0.0517371	-0.0790877	0.0418492	0.839466	0.92362
chr1	18057791	18058736	946	*	PND_Adult_NF_peak_2718	429	9.34588	45.4175	42.9855	464	Exon (ENSMUST00000209405.1/ENSMUST00000209405.1, exon 1 of 4)	1	18115204	18137051	21848	2	78081	ENSMUST00000115340.7	78315	ENSMUSG00000025774	Crisp4	cysteine-rich secretory protein 4	0	RP24-571A14.5	ENSMUST00000188360.1	exonic	TSS	0.128762	2.63077	0.926797	0.344373	0.584506
chr1	18058842	18059006	165	*	PND_Adult_NF_peak_2719	142	5.12844	16.4041	14.2768	78	Exon (ENSMUST00000209405.1/ENSMUST00000209405.1, exon 1 of 4)	1	18115204	18137051	21848	2	78081	ENSMUST00000115340.7	78045	ENSMUSG00000025774	Crisp4	cysteine-rich secretory protein 4	-50	RP24-571A14.6	ENSMUST00000209405.1	exonic	proximal <=1000bp	0.235773	0.0983376	1.20676	0.281826	0.52416
chr1	18099476	18099600	125	*	PND_Adult_NF_peak_2723	80	5.1351	9.99922	8.00071	35	Distal Intergenic	1	18115204	18137051	21848	2	78081	ENSMUST00000115340.7	37451	ENSMUSG00000025774	Crisp4	cysteine-rich secretory protein 4	-37451	Crisp4	ENSMUST00000115340.7	intergenic	intergenic	0.256843	-1.20039	0.460362	0.503319	0.714072
chr1	18213262	18213665	404	*	PND_Adult_NF_peak_2729	115	6.21617	13.6121	11.532	341	Intron (ENSMUST00000126871.1/654454, intron 1 of 1)	1	18210053	18223564	13512	2	654454	ENSMUST00000126871.1	9899	ENSMUSG00000070977	Defb44-ps	defensin beta 44, pseudogene	-9899	Defb44-ps	ENSMUST00000126871.1	intronic	intronic	0.628087	0.0170861	7.22284	0.0122603	0.0846002
chr1	18214164	18214413	250	*	PND_Adult_NF_peak_2730	63	4.59456	8.32052	6.36926	87	Intron (ENSMUST00000126871.1/654454, intron 1 of 1)	1	18210053	18223564	13512	2	654454	ENSMUST00000126871.1	9151	ENSMUSG00000070977	Defb44-ps	defensin beta 44, pseudogene	-9151	Defb44-ps	ENSMUST00000126871.1	intronic	intronic	0.666968	-0.752478	4.58109	0.0416631	0.175323
chr1	18288984	18289140	157	*	PND_Adult_NF_peak_2731	656	18.3783	68.2167	65.6466	50	Distal Intergenic	1	18250980	18265138	14159	2	77673	ENSMUST00000088463.1	-23846	ENSMUSG00000067773	Defb41	defensin beta 41	23846	Defb41	ENSMUST00000088463.1	intergenic	intergenic	0.228766	-0.92853	0.375223	0.545376	0.745576
chr1	18315699	18315888	190	*	PND_Adult_NF_peak_2733	216	8.91886	23.8403	21.6041	95	Distal Intergenic	1	18250980	18265138	14159	2	77673	ENSMUST00000088463.1	-50561	ENSMUSG00000067773	Defb41	defensin beta 41	50561	Defb41	ENSMUST00000088463.1	intergenic	intergenic	-0.625188	-1.08513	3.08311	0.0906277	0.275948
chr1	18323011	18323115	105	*	PND_Adult_NF_peak_2735	38	3.08995	5.67162	3.82351	13	Distal Intergenic	1	18250980	18265138	14159	2	77673	ENSMUST00000088463.1	-57873	ENSMUSG00000067773	Defb41	defensin beta 41	57873	Defb41	ENSMUST00000088463.1	intergenic	intergenic	0.312459	-0.961401	1.10954	0.301664	0.543679
chr1	18323259	18323597	339	*	PND_Adult_NF_peak_2736	205	6.74987	22.7524	20.5296	123	Distal Intergenic	1	18250980	18265138	14159	2	77673	ENSMUST00000088463.1	-58121	ENSMUSG00000067773	Defb41	defensin beta 41	58121	Defb41	ENSMUST00000088463.1	intergenic	intergenic	0.350814	0.969042	5.07699	0.0327097	0.152188
chr1	18323702	18323820	119	*	PND_Adult_NF_peak_2737	70	3.9609	8.99471	7.02944	91	Distal Intergenic	1	18250980	18265138	14159	2	77673	ENSMUST00000088463.1	-58564	ENSMUSG00000067773	Defb41	defensin beta 41	58564	Defb41	ENSMUST00000088463.1	intergenic	intergenic	0.100909	-0.255363	0.163498	0.689191	0.839492
chr1	18324351	18324509	159	*	PND_Adult_NF_peak_2738	120	5.08167	14.1195	12.0321	74	Distal Intergenic	1	18250980	18265138	14159	2	77673	ENSMUST00000088463.1	-59213	ENSMUSG00000067773	Defb41	defensin beta 41	59213	Defb41	ENSMUST00000088463.1	intergenic	intergenic	0.36991	0.12343	3.60268	0.0685963	0.234896
chr1	18324693	18324894	202	*	PND_Adult_NF_peak_2739	872	16.3164	89.9729	87.2985	79	Distal Intergenic	1	18250980	18265138	14159	2	77673	ENSMUST00000088463.1	-59555	ENSMUSG00000067773	Defb41	defensin beta 41	59555	Defb41	ENSMUST00000088463.1	intergenic	intergenic	0.0909206	0.726854	0.200775	0.657727	0.819974
chr1	18392391	18392615	225	*	PND_Adult_NF_peak_2740	115	6.21617	13.6121	11.532	145	Distal Intergenic	1	18250980	18265138	14159	2	77673	ENSMUST00000088463.1	-127253	ENSMUSG00000067773	Defb41	defensin beta 41	127253	Defb41	ENSMUST00000088463.1	intergenic	intergenic	0.0106493	-0.792247	0.00115943	0.973091	0.988322
chr1	18408671	18408989	319	*	PND_Adult_NF_peak_2741	1697	35.1806	172.719	169.741	209	Distal Intergenic	1	18250980	18265138	14159	2	77673	ENSMUST00000088463.1	-143533	ENSMUSG00000067773	Defb41	defensin beta 41	143533	Defb41	ENSMUST00000088463.1	intergenic	intergenic	0.279779	1.02223	2.95963	0.0969912	0.287055
chr1	18424702	18425013	312	*	PND_Adult_NF_peak_2742	1281	27.9443	131.033	128.197	181	Distal Intergenic	1	18250980	18265138	14159	2	77673	ENSMUST00000088463.1	-159564	ENSMUSG00000067773	Defb41	defensin beta 41	159564	Defb41	ENSMUST00000088463.1	intergenic	intergenic	0.435513	0.377336	3.88633	0.0591736	0.215438
chr1	18437062	18437259	198	*	PND_Adult_NF_peak_2743	271	10.2702	29.4681	27.1697	35	Distal Intergenic	1	18250980	18265138	14159	2	77673	ENSMUST00000088463.1	-171924	ENSMUSG00000067773	Defb41	defensin beta 41	171924	Defb41	ENSMUST00000088463.1	intergenic	intergenic	-0.667182	-1.16254	3.01378	0.0941396	0.281928
chr1	18630525	18630807	283	*	PND_Adult_NF_peak_2752	1247	27.3233	127.61	124.787	91	Distal Intergenic	1	18250980	18265138	14159	2	77673	ENSMUST00000088463.1	-365387	ENSMUSG00000067773	Defb41	defensin beta 41	-77621	RP24-284D7.1	ENSMUST00000189030.1	intergenic	intergenic	0.426318	0.202721	3.08475	0.0905976	0.275888
chr1	18639527	18639867	341	*	PND_Adult_NF_peak_2753	71	4.86483	9.14834	7.17275	70	Distal Intergenic	1	18250980	18265138	14159	2	77673	ENSMUST00000088463.1	-374389	ENSMUSG00000067773	Defb41	defensin beta 41	-68561	RP24-284D7.1	ENSMUST00000189030.1	intergenic	intergenic	0.309474	0.205255	1.74053	0.198325	0.430833
chr1	18775801	18776055	255	*	PND_Adult_NF_peak_2757	546	16.2161	57.1911	54.6825	152	Distal Intergenic	1	19103022	19166346	63325	1	226896	ENSMUST00000037294.7	-326967	ENSMUSG00000042596	Tfap2d	transcription factor AP-2, delta	67373	RP24-284D7.1	ENSMUST00000189030.1	intergenic	intergenic	-0.505795	-0.15242	3.57031	0.0697752	0.237227
chr1	18899821	18900013	193	*	PND_Adult_NF_peak_2761	318	11.3513	34.1747	31.8318	84	Distal Intergenic	1	19103022	19166346	63325	1	226896	ENSMUST00000037294.7	-203009	ENSMUSG00000042596	Tfap2d	transcription factor AP-2, delta	-69820	Gm24075	ENSMUST00000158175.1	intergenic	intergenic	0.308637	-0.869054	0.4991	0.487438	0.702728
chr1	18972825	18973090	266	*	PND_Adult_NF_peak_2762	184	8.10805	20.6158	18.4212	218	Distal Intergenic	1	19103022	19166346	63325	1	226896	ENSMUST00000037294.7	-129932	ENSMUSG00000042596	Tfap2d	transcription factor AP-2, delta	2992	Gm24075	ENSMUST00000158175.1	intergenic	intergenic	0.293911	-0.0568689	1.57806	0.219969	0.456449
chr1	19037372	19037862	491	*	PND_Adult_NF_peak_2767	88	5.40537	10.872	8.85172	90	Exon (ENSMUST00000185386.1/ENSMUST00000185386.1, exon 1 of 1)	1	19103022	19166346	63325	1	226896	ENSMUST00000037294.7	-65160	ENSMUSG00000042596	Tfap2d	transcription factor AP-2, delta	106	RP23-122B3.1	ENSMUST00000185386.1	exonic	proximal <=1000bp	0.657388	0.300315	11.4954	0.002193	0.0304509
chr1	19088256	19088423	168	*	PND_Adult_NF_peak_2769	330	11.6215	35.3775	33.0241	35	Intron (ENSMUST00000159108.2/102635013, intron 1 of 3)	1	19103022	19166346	63325	1	226896	ENSMUST00000037294.7	-14599	ENSMUSG00000042596	Tfap2d	transcription factor AP-2, delta	-14599	Tfap2d	ENSMUST00000037294.7	intronic	intronic	0.0306084	-0.881038	0.010249	0.920122	0.96377
chr1	19096954	19097176	223	*	PND_Adult_NF_peak_2770	504	14.2829	52.9713	50.4895	75	Intron (ENSMUST00000159108.2/102635013, intron 1 of 3)	1	19103022	19166346	63325	1	226896	ENSMUST00000037294.7	-5846	ENSMUSG00000042596	Tfap2d	transcription factor AP-2, delta	-5846	Tfap2d	ENSMUST00000037294.7	intronic	intronic	0.0676184	0.189707	0.11517	0.737001	0.867395
chr1	19099020	19099158	139	*	PND_Adult_NF_peak_2771	323	10.1576	34.6546	32.3082	60	Intron (ENSMUST00000159108.2/102635013, intron 1 of 3)	1	19103022	19166346	63325	1	226896	ENSMUST00000037294.7	-3864	ENSMUSG00000042596	Tfap2d	transcription factor AP-2, delta	-3864	Tfap2d	ENSMUST00000037294.7	intronic	intronic	0.356451	-1.0579	0.93367	0.342621	0.582753
chr1	19103865	19104021	157	*	PND_Adult_NF_peak_2772	96	4.7873	11.6436	9.61015	78	Promoter	1	19063300	19104840	41541	2	102635013	ENSMUST00000159108.2	819	ENSMUSG00000089787	Gm15825	predicted gene 15825	-819	AC098736.3	ENSMUST00000159108.2	intronic	proximal <=1000bp	0.00105463	0.0483709	2.44711e-05	0.99609	0.998281
chr1	19104141	19104861	721	*	PND_Adult_NF_peak_2773	451	12.0335	47.5894	45.143	72	Promoter	1	19063300	19104840	41541	2	102635013	ENSMUST00000159108.2	0	ENSMUSG00000089787	Gm15825	predicted gene 15825	0	AC098736.3	ENSMUST00000159108.2	exonic	TSS	-0.282993	1.6672	4.11749	0.0525662	0.200655
chr1	19109763	19109962	200	*	PND_Adult_NF_peak_2774	1253	26.295	128.202	125.376	102	Intron (ENSMUST00000037294.7/226896, intron 3 of 7)	1	19107181	19148367	41187	1	226896	ENSMUST00000149505.1	2582	ENSMUSG00000042596	Tfap2d	transcription factor AP-2, delta	2582	Tfap2d	ENSMUST00000149505.1	intronic	intronic	-0.381161	0.640265	4.40002	0.0455882	0.184678
chr1	19110052	19110141	90	*	PND_Adult_NF_peak_2775	98	5.38879	11.9398	9.89586	44	Intron (ENSMUST00000037294.7/226896, intron 3 of 7)	1	19107181	19148367	41187	1	226896	ENSMUST00000149505.1	2871	ENSMUSG00000042596	Tfap2d	transcription factor AP-2, delta	2871	Tfap2d	ENSMUST00000149505.1	intronic	intronic	-0.494892	0.0454826	4.40315	0.045517	0.184498
chr1	19111117	19111243	127	*	PND_Adult_NF_peak_2776	64	4.49284	8.43316	6.47957	84	Intron (ENSMUST00000037294.7/226896, intron 3 of 7)	1	19107181	19148367	41187	1	226896	ENSMUST00000149505.1	3936	ENSMUSG00000042596	Tfap2d	transcription factor AP-2, delta	3936	Tfap2d	ENSMUST00000149505.1	intronic	intronic	0.0466808	-0.985314	0.0196044	0.889703	0.948882
chr1	19139292	19139469	178	*	PND_Adult_NF_peak_2777	533	15.9458	55.8439	53.3435	70	Intron (ENSMUST00000037294.7/226896, intron 5 of 7)	1	19107181	19148367	41187	1	226896	ENSMUST00000149505.1	32111	ENSMUSG00000042596	Tfap2d	transcription factor AP-2, delta	-14497	AC098736.2	ENSMUST00000162030.1	intronic	intronic	0.094754	-0.475041	0.108671	0.744247	0.871587
chr1	19154579	19154811	233	*	PND_Adult_NF_peak_2781	573	16.7566	59.9067	57.3822	102	Intron (ENSMUST00000037294.7/226896, intron 7 of 7)	1	19107181	19148367	41187	1	226896	ENSMUST00000149505.1	47398	ENSMUSG00000042596	Tfap2d	transcription factor AP-2, delta	613	AC098736.2	ENSMUST00000162030.1	intronic	proximal <=1000bp	0.121923	-0.332737	0.238287	0.629449	0.802319
chr1	19179163	19179298	136	*	PND_Adult_NF_peak_2782	741	19.9999	76.755	74.1417	66	Distal Intergenic	1	19208914	19238576	29663	1	21419	ENSMUST00000027059.10	-29616	ENSMUSG00000025927	Tfap2b	transcription factor AP-2 beta	25197	AC098736.2	ENSMUST00000162030.1	intergenic	intergenic	-0.0821108	-0.786446	0.0655409	0.799914	0.902775
chr1	19205697	19205932	236	*	PND_Adult_NF_peak_2783	129	6.51363	15.0475	12.9426	91	Distal Intergenic	1	19208914	19238576	29663	1	21419	ENSMUST00000027059.10	-2982	ENSMUSG00000025927	Tfap2b	transcription factor AP-2 beta	-2982	Tfap2b	ENSMUST00000027059.10	intergenic	intergenic	0.0578838	-1.12515	0.021424	0.884734	0.946465
chr1	19210349	19210455	107	*	PND_Adult_NF_peak_2784	110	4.59497	13.1069	11.0394	49	Intron (ENSMUST00000027059.10/21419, intron 1 of 6)	1	19208960	19238083	29124	1	21419	ENSMUST00000187754.6	1389	ENSMUSG00000025927	Tfap2b	transcription factor AP-2 beta	1389	Tfap2b	ENSMUST00000187754.6	intronic	intronic	-0.186331	-0.057064	0.574618	0.455098	0.67819
chr1	19210722	19210886	165	*	PND_Adult_NF_peak_2785	104	4.48752	12.4781	10.4255	27	Intron (ENSMUST00000027059.10/21419, intron 1 of 6)	1	19212054	19234624	22571	1	21419	ENSMUST00000064976.5	-1168	ENSMUSG00000025927	Tfap2b	transcription factor AP-2 beta	-1168	Tfap2b	ENSMUST00000064976.5	intronic	intronic	-0.336643	0.228214	2.75259	0.108852	0.306665
chr1	19211153	19211303	151	*	PND_Adult_NF_peak_2786	48	3.28976	6.79111	4.89189	107	Promoter	1	19212054	19234624	22571	1	21419	ENSMUST00000064976.5	-751	ENSMUSG00000025927	Tfap2b	transcription factor AP-2 beta	-751	Tfap2b	ENSMUST00000064976.5	intronic	proximal <=1000bp	-0.586803	-0.518972	4.37648	0.0461281	0.185922
chr1	19211710	19211876	167	*	PND_Adult_NF_peak_2787	59	3.53156	7.88188	5.94831	112	Promoter	1	19212054	19234624	22571	1	21419	ENSMUST00000064976.5	-178	ENSMUSG00000025927	Tfap2b	transcription factor AP-2 beta	-178	Tfap2b	ENSMUST00000064976.5	intronic	proximal <=1000bp	-0.332665	-0.331451	1.76509	0.195285	0.426991
chr1	19214095	19214381	287	*	PND_Adult_NF_peak_2788	179	5.99478	20.1599	17.9734	194	Promoter	1	19213879	19219253	5375	1	21419	ENSMUST00000186972.1	216	ENSMUSG00000025927	Tfap2b	transcription factor AP-2 beta	216	Tfap2b	ENSMUST00000186972.1	exonic	proximal <=1000bp	-0.427759	0.152903	2.97895	0.0959623	0.285338
chr1	19225342	19225479	138	*	PND_Adult_NF_peak_2789	127	6.04021	14.8978	12.7949	71	Intron (ENSMUST00000027059.10/21419, intron 3 of 6)	1	19213879	19219253	5375	1	21419	ENSMUST00000186972.1	11463	ENSMUSG00000025927	Tfap2b	transcription factor AP-2 beta	11463	Tfap2b	ENSMUST00000186972.1	intronic	intronic	0.154167	-0.298566	0.398084	0.533469	0.736643
chr1	19226078	19226218	141	*	PND_Adult_NF_peak_2790	62	3.98746	8.23716	6.29563	81	Intron (ENSMUST00000027059.10/21419, intron 3 of 6)	1	19213879	19219253	5375	1	21419	ENSMUST00000186972.1	12199	ENSMUSG00000025927	Tfap2b	transcription factor AP-2 beta	12199	Tfap2b	ENSMUST00000186972.1	intronic	intronic	0.711163	-0.902419	4.35263	0.0466824	0.187199
chr1	19226714	19227023	310	*	PND_Adult_NF_peak_2791	561	12.8401	58.6929	56.1755	145	Intron (ENSMUST00000027059.10/21419, intron 4 of 6)	1	19213879	19219253	5375	1	21419	ENSMUST00000186972.1	12835	ENSMUSG00000025927	Tfap2b	transcription factor AP-2 beta	12835	Tfap2b	ENSMUST00000186972.1	intronic	intronic	0.348008	0.869153	3.57314	0.0696713	0.237031
chr1	19230922	19231099	178	*	PND_Adult_NF_peak_2792	270	6.92486	29.31	27.0151	51	Exon (ENSMUST00000027059.10/21419, exon 6 of 7)	1	19213879	19219253	5375	1	21419	ENSMUST00000186972.1	17043	ENSMUSG00000025927	Tfap2b	transcription factor AP-2 beta	-11626	RP24-119I6.2	ENSMUST00000189218.1	exonic	exonic	-0.248543	0.320107	1.32496	0.259954	0.500933
chr1	19231371	19231471	101	*	PND_Adult_NF_peak_2793	24	2.50129	4.21403	2.44154	80	Intron (ENSMUST00000027059.10/21419, intron 6 of 6)	1	19213879	19219253	5375	1	21419	ENSMUST00000186972.1	17492	ENSMUSG00000025927	Tfap2b	transcription factor AP-2 beta	-11254	RP24-119I6.2	ENSMUST00000189218.1	intronic	intronic	-0.0991054	-0.307066	0.142916	0.708402	0.850691
chr1	19233796	19233988	193	*	PND_Adult_NF_peak_2794	92	4.06904	11.2461	9.21941	55	Intron (ENSMUST00000027059.10/21419, intron 6 of 6)	1	19213879	19219253	5375	1	21419	ENSMUST00000186972.1	19917	ENSMUSG00000025927	Tfap2b	transcription factor AP-2 beta	-8737	RP24-119I6.2	ENSMUST00000189218.1	intronic	intronic	0.107762	0.0340994	0.222127	0.641269	0.809667
chr1	19234080	19234255	176	*	PND_Adult_NF_peak_2795	142	4.9903	16.3315	14.2051	102	Exon (ENSMUST00000027059.10/21419, exon 7 of 7)	1	19213879	19219253	5375	1	21419	ENSMUST00000186972.1	20201	ENSMUSG00000025927	Tfap2b	transcription factor AP-2 beta	-8470	RP24-119I6.2	ENSMUST00000189218.1	exonic	exonic	0.0752417	0.166759	0.123791	0.727733	0.862239
chr1	19234841	19235174	334	*	PND_Adult_NF_peak_2796	165	5.38692	18.6905	16.5239	58	3' UTR	1	19213879	19219253	5375	1	21419	ENSMUST00000186972.1	20962	ENSMUSG00000025927	Tfap2b	transcription factor AP-2 beta	-7551	RP24-119I6.2	ENSMUST00000189218.1	exonic	exonic	0.145404	0.436808	0.497515	0.48673	0.702261
chr1	19236708	19236886	179	*	PND_Adult_NF_peak_2797	390	7.56662	41.4607	39.0592	81	3' UTR	1	19213879	19219253	5375	1	21419	ENSMUST00000186972.1	22829	ENSMUSG00000025927	Tfap2b	transcription factor AP-2 beta	-5839	RP24-119I6.2	ENSMUST00000189218.1	exonic	exonic	-0.104203	0.87925	0.367611	0.549453	0.748566
chr1	19241444	19241691	248	*	PND_Adult_NF_peak_2798	2192	28.1151	222.331	219.201	101	Distal Intergenic	1	19213879	19219253	5375	1	21419	ENSMUST00000186972.1	27565	ENSMUSG00000025927	Tfap2b	transcription factor AP-2 beta	-1034	RP24-119I6.2	ENSMUST00000189218.1	intergenic	intergenic	0.246907	1.55064	3.50414	0.0722583	0.242112
chr1	19264777	19265178	402	*	PND_Adult_NF_peak_2800	183	8.05169	20.5022	18.312	130	Distal Intergenic	1	19213879	19219253	5375	1	21419	ENSMUST00000186972.1	50898	ENSMUSG00000025927	Tfap2b	transcription factor AP-2 beta	22052	RP24-119I6.2	ENSMUST00000189218.1	intergenic	intergenic	0.0689236	0.340586	0.152829	0.73054	0.864013
chr1	19265331	19265776	446	*	PND_Adult_NF_peak_2801	221	8.91937	24.3889	22.1475	82	Distal Intergenic	1	19213879	19219253	5375	1	21419	ENSMUST00000186972.1	51452	ENSMUSG00000025927	Tfap2b	transcription factor AP-2 beta	22606	RP24-119I6.2	ENSMUST00000189218.1	intergenic	intergenic	-0.0811548	0.711394	0.190396	0.666111	0.825276
chr1	19290058	19290138	81	*	PND_Adult_NF_peak_2803	63	4.59456	8.32052	6.36926	49	Distal Intergenic	1	19213879	19219253	5375	1	21419	ENSMUST00000186972.1	76179	ENSMUSG00000025927	Tfap2b	transcription factor AP-2 beta	-30559	RP24-119I6.4	ENSMUST00000190883.1	intergenic	intergenic	-0.241152	-1.1678	0.482512	0.493314	0.707019
chr1	19290261	19290363	103	*	PND_Adult_NF_peak_2804	163	7.56752	18.5361	16.3714	49	Distal Intergenic	1	19213879	19219253	5375	1	21419	ENSMUST00000186972.1	76382	ENSMUSG00000025927	Tfap2b	transcription factor AP-2 beta	-30334	RP24-119I6.4	ENSMUST00000190883.1	intergenic	intergenic	0.148313	-0.936486	0.196197	0.661392	0.822204
chr1	19330936	19331137	202	*	PND_Adult_NF_peak_2805	213	8.53427	23.5846	21.3537	55	Exon (ENSMUST00000188428.1/ENSMUST00000188428.1, exon 1 of 1)	1	19213879	19219253	5375	1	21419	ENSMUST00000186972.1	117057	ENSMUSG00000025927	Tfap2b	transcription factor AP-2 beta	0	RP24-119I6.5	ENSMUST00000188428.1	exonic	TSS	-0.215245	0.241755	1.15372	0.292427	0.534662
chr1	19331213	19331648	436	*	PND_Adult_NF_peak_2806	114	5.97373	13.5358	11.4618	56	Exon (ENSMUST00000188428.1/ENSMUST00000188428.1, exon 1 of 1)	1	19213879	19219253	5375	1	21419	ENSMUST00000186972.1	117334	ENSMUSG00000025927	Tfap2b	transcription factor AP-2 beta	274	RP24-119I6.5	ENSMUST00000188428.1	exonic	proximal <=1000bp	-0.206196	0.995175	1.26264	0.271198	0.512941
chr1	19344558	19344879	322	*	PND_Adult_NF_peak_2807	1451	26.3222	148.081	145.186	135	Distal Intergenic	1	19213879	19219253	5375	1	21419	ENSMUST00000186972.1	130679	ENSMUSG00000025927	Tfap2b	transcription factor AP-2 beta	13619	RP24-119I6.5	ENSMUST00000188428.1	intergenic	intergenic	0.043822	1.50124	0.0862433	0.771289	0.886374
chr1	19345224	19345349	126	*	PND_Adult_NF_peak_2808	65	4.08313	8.45418	6.50015	55	Distal Intergenic	1	19213879	19219253	5375	1	21419	ENSMUST00000186972.1	131345	ENSMUSG00000025927	Tfap2b	transcription factor AP-2 beta	14285	RP24-119I6.5	ENSMUST00000188428.1	intergenic	intergenic	-0.0275926	0.0478891	0.0148546	0.903911	0.955872
chr1	19460248	19460448	201	*	PND_Adult_NF_peak_2813	134	6.75671	15.5317	13.4158	124	Distal Intergenic	1	19213879	19219253	5375	1	21419	ENSMUST00000186972.1	246369	ENSMUSG00000025927	Tfap2b	transcription factor AP-2 beta	-53471	Gm24633	ENSMUST00000122719.1	intergenic	intergenic	-0.130005	-0.0253573	0.16403	0.689505	0.839674
chr1	19531556	19531859	304	*	PND_Adult_NF_peak_2815	2151	38.744	218.238	215.12	176	Distal Intergenic	1	19213879	19219253	5375	1	21419	ENSMUST00000186972.1	317677	ENSMUSG00000025927	Tfap2b	transcription factor AP-2 beta	17637	Gm24633	ENSMUST00000122719.1	intergenic	intergenic	-0.0856189	1.12092	0.253283	0.618918	0.795226
chr1	19540773	19540941	169	*	PND_Adult_NF_peak_2816	143	7.02698	16.5171	14.3843	65	Distal Intergenic	1	19213879	19219253	5375	1	21419	ENSMUST00000186972.1	326894	ENSMUSG00000025927	Tfap2b	transcription factor AP-2 beta	26854	Gm24633	ENSMUST00000122719.1	intergenic	intergenic	0.335735	-0.625353	1.41897	0.244101	0.483828
chr1	19636648	19636898	251	*	PND_Adult_NF_peak_2818	260	9.99993	28.3188	26.0322	80	Distal Intergenic	1	19213879	19219253	5375	1	21419	ENSMUST00000186972.1	422769	ENSMUSG00000025927	Tfap2b	transcription factor AP-2 beta	22379	RP24-132H2.1	ENSMUST00000193790.1	intergenic	intergenic	0.0380317	-0.624767	0.020448	0.887372	0.947771
chr1	19767253	19768204	952	*	PND_Adult_NF_peak_2823	377	12.326	40.1711	37.7796	675	Distal Intergenic	1	19213879	19219253	5375	1	21419	ENSMUST00000186972.1	553374	ENSMUSG00000025927	Tfap2b	transcription factor AP-2 beta	152984	RP24-132H2.1	ENSMUST00000193790.1	intergenic	intergenic	-0.536847	1.22412	12.1235	0.00173771	0.0264564
chr1	19868927	19869086	160	*	PND_Adult_NF_peak_2827	71	4.86483	9.14834	7.17275	97	Distal Intergenic	1	20356452	20392300	35849	1	75028	ENSMUST00000161509.2	-487366	ENSMUSG00000089914	4930486I03Rik	RIKEN cDNA 4930486I03 gene	-196462	RP23-245C4.1	ENSMUST00000194347.1	intergenic	intergenic	-0.0237888	-0.869777	0.00648164	0.936436	0.971703
chr1	19899627	19899745	119	*	PND_Adult_NF_peak_2828	49	3.96404	6.83742	4.9371	68	Distal Intergenic	1	20356452	20392300	35849	1	75028	ENSMUST00000161509.2	-456707	ENSMUSG00000089914	4930486I03Rik	RIKEN cDNA 4930486I03 gene	-165803	RP23-245C4.1	ENSMUST00000194347.1	intergenic	intergenic	-0.261501	-0.542495	0.987154	0.329398	0.570398
chr1	19899849	19900267	419	*	PND_Adult_NF_peak_2829	307	10.5266	33.052	30.7194	102	Distal Intergenic	1	20356452	20392300	35849	1	75028	ENSMUST00000161509.2	-456185	ENSMUSG00000089914	4930486I03Rik	RIKEN cDNA 4930486I03 gene	-165281	RP23-245C4.1	ENSMUST00000194347.1	intergenic	intergenic	-0.0948718	1.01872	0.390572	0.537327	0.739435
chr1	19929604	19929797	194	*	PND_Adult_NF_peak_2832	391	12.9729	41.5363	39.1328	100	Distal Intergenic	1	20356452	20392300	35849	1	75028	ENSMUST00000161509.2	-426655	ENSMUSG00000089914	4930486I03Rik	RIKEN cDNA 4930486I03 gene	-135751	RP23-245C4.1	ENSMUST00000194347.1	intergenic	intergenic	-1.61422	-0.804239	21.0165	9.61313e-05	0.00457292
chr1	19950493	19950864	372	*	PND_Adult_NF_peak_2833	237	9.45939	26.0552	23.7932	272	Distal Intergenic	1	20356452	20392300	35849	1	75028	ENSMUST00000161509.2	-405588	ENSMUSG00000089914	4930486I03Rik	RIKEN cDNA 4930486I03 gene	-114684	RP23-245C4.1	ENSMUST00000194347.1	intergenic	intergenic	0.719583	-0.430834	6.37757	0.0178401	0.105871
chr1	19951367	19951951	585	*	PND_Adult_NF_peak_2834	330	11.6215	35.3775	33.0241	65	Distal Intergenic	1	20356452	20392300	35849	1	75028	ENSMUST00000161509.2	-404501	ENSMUSG00000089914	4930486I03Rik	RIKEN cDNA 4930486I03 gene	-113597	RP23-245C4.1	ENSMUST00000194347.1	intergenic	intergenic	-0.207978	0.607853	1.16423	0.290285	0.532541
chr1	19968843	19969017	175	*	PND_Adult_NF_peak_2835	288	9.95376	31.185	28.8708	73	Distal Intergenic	1	20356452	20392300	35849	1	75028	ENSMUST00000161509.2	-387435	ENSMUSG00000089914	4930486I03Rik	RIKEN cDNA 4930486I03 gene	-96531	RP23-245C4.1	ENSMUST00000194347.1	intergenic	intergenic	-0.354183	0.141746	2.42667	0.131114	0.340961
chr1	19969162	19969290	129	*	PND_Adult_NF_peak_2836	26	3.06193	4.44477	2.66395	15	Distal Intergenic	1	20356452	20392300	35849	1	75028	ENSMUST00000161509.2	-387162	ENSMUSG00000089914	4930486I03Rik	RIKEN cDNA 4930486I03 gene	-96258	RP23-245C4.1	ENSMUST00000194347.1	intergenic	intergenic	-0.274993	-0.584832	0.982392	0.330546	0.571483
chr1	19969386	19969538	153	*	PND_Adult_NF_peak_2837	267	9.52197	29.0561	26.7634	84	Distal Intergenic	1	20356452	20392300	35849	1	75028	ENSMUST00000161509.2	-386914	ENSMUSG00000089914	4930486I03Rik	RIKEN cDNA 4930486I03 gene	-96010	RP23-245C4.1	ENSMUST00000194347.1	intergenic	intergenic	-0.0272815	-0.219888	0.0098707	0.921605	0.964366
chr1	19991277	19991686	410	*	PND_Adult_NF_peak_2838	493	15.135	51.8468	49.3713	187	Distal Intergenic	1	20356452	20392300	35849	1	75028	ENSMUST00000161509.2	-364766	ENSMUSG00000089914	4930486I03Rik	RIKEN cDNA 4930486I03 gene	-73862	RP23-245C4.1	ENSMUST00000194347.1	intergenic	intergenic	-0.654144	0.157229	7.59237	0.0104491	0.0769863
chr1	20035434	20035530	97	*	PND_Adult_NF_peak_2840	55	4.32429	7.51705	5.59157	46	Distal Intergenic	1	20356452	20392300	35849	1	75028	ENSMUST00000161509.2	-320922	ENSMUSG00000089914	4930486I03Rik	RIKEN cDNA 4930486I03 gene	-30018	RP23-245C4.1	ENSMUST00000194347.1	intergenic	intergenic	-0.11424	-0.672535	0.156722	0.695353	0.843024
chr1	20035648	20035766	119	*	PND_Adult_NF_peak_2841	80	5.1351	9.99922	8.00071	40	Distal Intergenic	1	20356452	20392300	35849	1	75028	ENSMUST00000161509.2	-320686	ENSMUSG00000089914	4930486I03Rik	RIKEN cDNA 4930486I03 gene	-29782	RP23-245C4.1	ENSMUST00000194347.1	intergenic	intergenic	0.158958	-0.640179	0.316978	0.578148	0.768632
chr1	20190460	20190730	271	*	PND_Adult_NF_peak_2844	153	7.29725	17.5188	15.3698	222	Intron (ENSMUST00000088448.11/241035, intron 60 of 66)	1	20356452	20392300	35849	1	75028	ENSMUST00000161509.2	-165722	ENSMUSG00000089914	4930486I03Rik	RIKEN cDNA 4930486I03 gene	124912	RP23-245C4.1	ENSMUST00000194347.1	intronic	intronic	0.549787	-0.224119	5.27829	0.029704	0.143404
chr1	20224702	20224878	177	*	PND_Adult_NF_peak_2847	106	5.9459	12.6794	10.6183	90	Intron (ENSMUST00000088448.11/241035, intron 53 of 66)	1	20356452	20392300	35849	1	75028	ENSMUST00000161509.2	-131574	ENSMUSG00000089914	4930486I03Rik	RIKEN cDNA 4930486I03 gene	-131574	AC101789.2	ENSMUST00000161509.2	intronic	intronic	0.0812486	-0.930975	0.058069	0.811423	0.908926
chr1	20254053	20254203	151	*	PND_Adult_NF_peak_2849	41	3.78376	5.98892	4.12049	89	Intron (ENSMUST00000088448.11/241035, intron 52 of 66)	1	20356452	20392300	35849	1	75028	ENSMUST00000161509.2	-102249	ENSMUSG00000089914	4930486I03Rik	RIKEN cDNA 4930486I03 gene	-102249	AC101789.2	ENSMUST00000161509.2	intronic	intronic	-0.343125	-0.917984	1.04468	0.315949	0.557683
chr1	20273670	20274407	738	*	PND_Adult_NF_peak_2851	4578	32.6056	461.681	457.876	374	Intron (ENSMUST00000088448.11/241035, intron 52 of 66)	1	20356452	20392300	35849	1	75028	ENSMUST00000161509.2	-82045	ENSMUSG00000089914	4930486I03Rik	RIKEN cDNA 4930486I03 gene	-82045	AC101789.2	ENSMUST00000161509.2	intronic	intronic	0.151114	3.68654	2.12508	0.15662	0.376899
chr1	20450469	20450626	158	*	PND_Adult_NF_peak_2856	587	17.0269	61.275	58.7426	82	Intron (ENSMUST00000088448.11/241035, intron 35 of 66)	1	20374722	20409448	34727	2	241035	ENSMUST00000132647.1	-41021	ENSMUSG00000043760	Pkhd1	polycystic kidney and hepatic disease 1	5557	Gm24162	ENSMUST00000093665.1	intronic	intronic	-0.195965	0.304845	0.520538	0.477784	0.695463
chr1	20450803	20450899	97	*	PND_Adult_NF_peak_2857	55	4.32429	7.51705	5.59157	52	Intron (ENSMUST00000088448.11/241035, intron 35 of 66)	1	20374722	20409448	34727	2	241035	ENSMUST00000132647.1	-41355	ENSMUSG00000043760	Pkhd1	polycystic kidney and hepatic disease 1	5891	Gm24162	ENSMUST00000093665.1	intronic	intronic	-0.736205	-1.03013	4.3825	0.0459895	0.185647
chr1	20477529	20477614	86	*	PND_Adult_NF_peak_2858	23	3.00927	4.16299	2.3923	66	Intron (ENSMUST00000088448.11/241035, intron 35 of 66)	1	20374722	20409448	34727	2	241035	ENSMUST00000132647.1	-68081	ENSMUSG00000043760	Pkhd1	polycystic kidney and hepatic disease 1	32617	Gm24162	ENSMUST00000093665.1	intronic	intronic	-0.637119	-0.781595	3.51818	0.0717233	0.24113
chr1	20477841	20478287	447	*	PND_Adult_NF_peak_2859	407	12.7416	43.1163	40.7013	89	Intron (ENSMUST00000088448.11/241035, intron 35 of 66)	1	20374722	20409448	34727	2	241035	ENSMUST00000132647.1	-68393	ENSMUSG00000043760	Pkhd1	polycystic kidney and hepatic disease 1	32929	Gm24162	ENSMUST00000093665.1	intronic	intronic	-0.267741	0.953517	2.46768	0.128038	0.33654
chr1	20515885	20516144	260	*	PND_Adult_NF_peak_2863	2692	41.2658	272.535	269.258	140	Intron (ENSMUST00000088448.11/241035, intron 33 of 66)	1	20606297	20618040	11744	2	241035	ENSMUST00000128051.1	101896	ENSMUSG00000043760	Pkhd1	polycystic kidney and hepatic disease 1	70973	Gm24162	ENSMUST00000093665.1	intronic	intronic	-0.245874	1.31048	1.8348	0.187032	0.416489
chr1	20544650	20544843	194	*	PND_Adult_NF_peak_2864	828	21.6215	85.5032	82.8487	65	Intron (ENSMUST00000088448.11/241035, intron 27 of 66)	1	20606297	20618040	11744	2	241035	ENSMUST00000128051.1	73197	ENSMUSG00000043760	Pkhd1	polycystic kidney and hepatic disease 1	-73197	Pkhd1	ENSMUST00000128051.1	intronic	intronic	0.0574137	-0.407442	0.0393941	0.84418	0.925974
chr1	20546491	20546730	240	*	PND_Adult_NF_peak_2865	226	9.18913	24.9415	22.6922	120	Intron (ENSMUST00000088448.11/241035, intron 27 of 66)	1	20606297	20618040	11744	2	241035	ENSMUST00000128051.1	71310	ENSMUSG00000043760	Pkhd1	polycystic kidney and hepatic disease 1	-71310	Pkhd1	ENSMUST00000128051.1	intronic	intronic	-0.436531	-1.06128	1.13144	0.297037	0.538982
chr1	20554433	20554679	247	*	PND_Adult_NF_peak_2866	1131	26.5479	115.948	113.167	139	Intron (ENSMUST00000088448.11/241035, intron 22 of 66)	1	20606297	20618040	11744	2	241035	ENSMUST00000128051.1	63361	ENSMUSG00000043760	Pkhd1	polycystic kidney and hepatic disease 1	-63361	Pkhd1	ENSMUST00000128051.1	intronic	intronic	0.0595182	0.0270249	0.0674382	0.797105	0.901137
chr1	20593456	20593832	377	*	PND_Adult_NF_peak_2870	2394	35.5164	242.639	239.449	198	Exon (ENSMUST00000147480.7/241035, exon 6 of 6)	1	20606297	20618040	11744	2	241035	ENSMUST00000128051.1	24208	ENSMUSG00000043760	Pkhd1	polycystic kidney and hepatic disease 1	-24208	Pkhd1	ENSMUST00000128051.1	exonic	exonic	-0.155898	1.65596	1.03993	0.31703	0.558715
chr1	20612794	20612935	142	*	PND_Adult_NF_peak_2871	71	4.86483	9.14834	7.17275	45	Exon (ENSMUST00000088448.11/241035, exon 4 of 67)	1	20606297	20618040	11744	2	241035	ENSMUST00000128051.1	5105	ENSMUSG00000043760	Pkhd1	polycystic kidney and hepatic disease 1	-5105	Pkhd1	ENSMUST00000128051.1	exonic	exonic	0.161645	-1.06869	0.23462	0.632086	0.803909
chr1	20617691	20617859	169	*	PND_Adult_NF_peak_2873	124	6.48644	14.5631	12.4648	40	Promoter	1	20606297	20618040	11744	2	241035	ENSMUST00000128051.1	181	ENSMUSG00000043760	Pkhd1	polycystic kidney and hepatic disease 1	-181	Pkhd1	ENSMUST00000128051.1	intronic	proximal <=1000bp	0.00426134	-0.572188	0.000190019	0.989105	0.995398
chr1	20665594	20665890	297	*	PND_Adult_NF_peak_2876	1902	32.3934	193.265	190.223	117	Distal Intergenic	1	20669882	20682958	13077	1	105661730	ENSMUST00000227082.1	-3992	ENSMUSG00000099906	Lincmd1	long intergenic non-protein coding RNA of muscle differentiation 1	-3992	Lincmd1	ENSMUST00000227082.1	intergenic	intergenic	-0.386301	0.827534	4.5261	0.0428138	0.178063
chr1	20666609	20666702	94	*	PND_Adult_NF_peak_2877	50	3.6335	6.92128	5.01893	18	Distal Intergenic	1	20669882	20682958	13077	1	105661730	ENSMUST00000227082.1	-3180	ENSMUSG00000099906	Lincmd1	long intergenic non-protein coding RNA of muscle differentiation 1	-3180	Lincmd1	ENSMUST00000227082.1	intergenic	intergenic	-1.44057	-1.13616	9.75178	0.00429075	0.045334
chr1	20693279	20693416	138	*	PND_Adult_NF_peak_2880	153	7.29725	17.5188	15.3698	81	Distal Intergenic	1	20682769	20682887	119	1	723817	ENSMUST00000083546.1	10510	ENSMUSG00000065480	Mir133b	microRNA 133b	10510	Mir133b	ENSMUST00000083546.1	intergenic	intergenic	0.701918	-1.31175	1.84234	0.188415	0.418369
chr1	20705418	20705629	212	*	PND_Adult_NF_peak_2881	194	8.37832	21.6771	19.4682	155	Distal Intergenic	1	20682769	20682887	119	1	723817	ENSMUST00000083546.1	22649	ENSMUSG00000065480	Mir133b	microRNA 133b	22649	Mir133b	ENSMUST00000083546.1	intergenic	intergenic	-0.233842	-1.14523	0.418939	0.523018	0.72903
chr1	20728706	20729149	444	*	PND_Adult_NF_peak_2882	747	15.78	77.3201	74.7043	194	Distal Intergenic	1	20730905	20734496	3592	1	16171	ENSMUST00000027061.4	-1756	ENSMUSG00000025929	Il17a	interleukin 17A	-1756	Il17a	ENSMUST00000027061.4	intergenic	intergenic	-0.637048	1.16625	11.9555	0.00184849	0.0274286
chr1	20733635	20733888	254	*	PND_Adult_NF_peak_2883	313	9.27773	33.6567	31.3195	138	3' UTR	1	20730905	20734496	3592	1	16171	ENSMUST00000027061.4	2730	ENSMUSG00000025929	Il17a	interleukin 17A	2730	Il17a	ENSMUST00000027061.4	exonic	exonic	-0.0372349	0.108754	0.0222157	0.88264	0.945353
chr1	20743866	20744272	407	*	PND_Adult_NF_peak_2884	342	11.8918	36.5902	34.2265	105	Distal Intergenic	1	20730905	20734496	3592	1	16171	ENSMUST00000027061.4	12961	ENSMUSG00000025929	Il17a	interleukin 17A	12961	Il17a	ENSMUST00000027061.4	intergenic	intergenic	0.481851	-0.84297	1.95407	0.173706	0.39961
chr1	20751353	20751697	345	*	PND_Adult_NF_peak_2885	1461	27.0805	149.08	146.181	118	Distal Intergenic	1	20730905	20734496	3592	1	16171	ENSMUST00000027061.4	20448	ENSMUSG00000025929	Il17a	interleukin 17A	20448	Il17a	ENSMUST00000027061.4	intergenic	intergenic	-0.0943813	0.97995	0.320571	0.576014	0.767128
chr1	20756636	20757101	466	*	PND_Adult_NF_peak_2886	6161	41.8511	620.378	616.132	207	Distal Intergenic	1	20777679	20779554	1876	2	257630	ENSMUST00000191111.1	22453	ENSMUSG00000041872	Il17f	interleukin 17F	-22453	Il17f	ENSMUST00000191111.1	intergenic	intergenic	0.073124	3.54009	0.438323	0.513632	0.721906
chr1	20761709	20761918	210	*	PND_Adult_NF_peak_2887	223	6.47091	24.6226	22.379	126	Distal Intergenic	1	20777679	20779554	1876	2	257630	ENSMUST00000191111.1	17636	ENSMUSG00000041872	Il17f	interleukin 17F	-17636	Il17f	ENSMUST00000191111.1	intergenic	intergenic	0.13401	-0.522875	0.247037	0.623255	0.798092
chr1	20769862	20770048	187	*	PND_Adult_NF_peak_2889	63	4.59456	8.32052	6.36926	125	Distal Intergenic	1	20777679	20779554	1876	2	257630	ENSMUST00000191111.1	9506	ENSMUSG00000041872	Il17f	interleukin 17F	-9506	Il17f	ENSMUST00000191111.1	intergenic	intergenic	0.0208546	-0.44009	0.00698895	0.934001	0.970386
chr1	20786483	20786613	131	*	PND_Adult_NF_peak_2891	350	10.2747	37.3749	35.0057	50	Intron (ENSMUST00000189301.1/257630, intron 1 of 4)	1	20777146	20784270	7125	2	257630	ENSMUST00000039046.9	-2213	ENSMUSG00000041872	Il17f	interleukin 17F	2213	Il17f	ENSMUST00000039046.9	intronic	intronic	-0.0525302	-0.401857	0.0371883	0.848548	0.928306
chr1	20786781	20787032	252	*	PND_Adult_NF_peak_2892	121	5.58633	14.2675	12.178	193	Intron (ENSMUST00000189301.1/257630, intron 1 of 4)	1	20777146	20784270	7125	2	257630	ENSMUST00000039046.9	-2511	ENSMUSG00000041872	Il17f	interleukin 17F	2511	Il17f	ENSMUST00000039046.9	intronic	intronic	0.197126	-0.0175157	0.545507	0.466709	0.687227
chr1	20787137	20787370	234	*	PND_Adult_NF_peak_2893	315	9.59088	33.8725	31.5337	74	Intron (ENSMUST00000189301.1/257630, intron 1 of 4)	1	20777146	20784270	7125	2	257630	ENSMUST00000039046.9	-2867	ENSMUSG00000041872	Il17f	interleukin 17F	2867	Il17f	ENSMUST00000039046.9	intronic	intronic	1.18083	-0.0306169	32.8688	4.53539e-06	0.000714785
chr1	20795620	20795798	179	*	PND_Adult_NF_peak_2895	213	8.07388	23.6288	21.3974	94	Distal Intergenic	1	20777783	20790617	12835	2	257630	ENSMUST00000189301.1	-5003	ENSMUSG00000041872	Il17f	interleukin 17F	5003	Il17f	ENSMUST00000189301.1	intergenic	intergenic	-0.57575	-1.06614	2.62409	0.117058	0.319484
chr1	20797189	20797318	130	*	PND_Adult_NF_peak_2896	122	5.77454	14.3084	12.2183	63	Distal Intergenic	1	20777783	20790617	12835	2	257630	ENSMUST00000189301.1	-6572	ENSMUSG00000041872	Il17f	interleukin 17F	-6403	Mcm3	ENSMUST00000188112.1	intergenic	intergenic	0.210291	-1.06427	0.30742	0.583903	0.772393
chr1	20820112	20820526	415	*	PND_Adult_NF_peak_2897	10502	55.1133	1055.75	1050.28	277	Promoter	1	20802973	20820260	17288	2	17215	ENSMUST00000185296.1	0	ENSMUSG00000041859	Mcm3	minichromosome maintenance complex component 3	0	Mcm3	ENSMUST00000185296.1	exonic	TSS	0.633167	4.15919	35.9879	2.25854e-06	0.000465829
chr1	20859878	20860149	272	*	PND_Adult_NF_peak_2898	6000	53.5001	604.207	600.008	139	Distal Intergenic	1	20888650	20890473	1824	2	77741	ENSMUST00000181654.1	30324	ENSMUSG00000097934	6720483E21Rik	RIKEN cDNA 6720483E21 gene	17212	Gm24723	ENSMUST00000158233.1	intergenic	intergenic	0.0363357	2.57892	0.080985	0.778172	0.890517
chr1	20867551	20867890	340	*	PND_Adult_NF_peak_2899	58	3.60034	7.8202	5.88802	135	Distal Intergenic	1	20888650	20890473	1824	2	77741	ENSMUST00000181654.1	22583	ENSMUSG00000097934	6720483E21Rik	RIKEN cDNA 6720483E21 gene	-22583	RP23-191A12.5	ENSMUST00000181654.1	intergenic	intergenic	0.248409	0.380231	1.65734	0.20906	0.443814
chr1	20868152	20868617	466	*	PND_Adult_NF_peak_2900	516	11.4995	54.1216	51.6325	394	Distal Intergenic	1	20888650	20890473	1824	2	77741	ENSMUST00000181654.1	21856	ENSMUSG00000097934	6720483E21Rik	RIKEN cDNA 6720483E21 gene	-21856	RP23-191A12.5	ENSMUST00000181654.1	intergenic	intergenic	0.172	1.47492	0.505595	0.48723	0.702574
chr1	20868808	20868973	166	*	PND_Adult_NF_peak_2901	246	7.37331	26.8802	24.6108	68	Distal Intergenic	1	20888650	20890473	1824	2	77741	ENSMUST00000181654.1	21500	ENSMUSG00000097934	6720483E21Rik	RIKEN cDNA 6720483E21 gene	-21500	RP23-191A12.5	ENSMUST00000181654.1	intergenic	intergenic	1.40573	-0.408838	10.742	0.00479588	0.0485148
chr1	20871275	20871449	175	*	PND_Adult_NF_peak_2902	154	5.67852	17.6316	15.4813	76	Distal Intergenic	1	20888650	20890473	1824	2	77741	ENSMUST00000181654.1	19024	ENSMUSG00000097934	6720483E21Rik	RIKEN cDNA 6720483E21 gene	-19024	RP23-191A12.5	ENSMUST00000181654.1	intergenic	intergenic	0.462046	-1.03591	1.6963	0.203945	0.437749
chr1	20890357	20891114	758	*	PND_Adult_NF_peak_2903	2944	25.7178	297.821	294.473	177	Promoter	1	20888650	20890473	1824	2	77741	ENSMUST00000181654.1	0	ENSMUSG00000097934	6720483E21Rik	RIKEN cDNA 6720483E21 gene	0	RP23-191A12.5	ENSMUST00000181654.1	exonic	TSS	-0.0637406	3.20552	0.306	0.584768	0.772882
chr1	20891263	20891387	125	*	PND_Adult_NF_peak_2904	163	4.48496	18.4748	16.3143	46	Promoter	1	20890606	20939650	49045	1	74229	ENSMUST00000189400.6	657	ENSMUSG00000025931	Paqr8	progestin and adipoQ receptor family member VIII	657	Paqr8	ENSMUST00000189400.6	intronic	proximal <=1000bp	-0.492381	1.27034	7.48448	0.0109457	0.0791738
chr1	20891517	20891605	89	*	PND_Adult_NF_peak_2905	65	3.03552	8.45914	6.50501	39	Promoter	1	20890606	20939650	49045	1	74229	ENSMUST00000189400.6	911	ENSMUSG00000025931	Paqr8	progestin and adipoQ receptor family member VIII	911	Paqr8	ENSMUST00000189400.6	intronic	proximal <=1000bp	-0.0416634	0.715336	0.0615079	0.806034	0.906031
chr1	20892063	20892211	149	*	PND_Adult_NF_peak_2906	172	4.56334	19.4516	17.2763	75	Intron (ENSMUST00000189400.6/74229, intron 1 of 2)	1	20890606	20939650	49045	1	74229	ENSMUST00000189400.6	1457	ENSMUSG00000025931	Paqr8	progestin and adipoQ receptor family member VIII	1457	Paqr8	ENSMUST00000189400.6	intronic	intronic	0.24616	-0.00686184	1.36243	0.253482	0.494052
chr1	20898874	20899085	212	*	PND_Adult_NF_peak_2908	546	16.2161	57.1911	54.6825	86	Intron (ENSMUST00000189400.6/74229, intron 1 of 2)	1	20890606	20939650	49045	1	74229	ENSMUST00000189400.6	8268	ENSMUSG00000025931	Paqr8	progestin and adipoQ receptor family member VIII	8268	Paqr8	ENSMUST00000189400.6	intronic	intronic	0.381257	-0.58512	1.33355	0.258534	0.499468
chr1	20907391	20907505	115	*	PND_Adult_NF_peak_2909	52	3.12304	7.16615	5.25792	50	Intron (ENSMUST00000189400.6/74229, intron 1 of 2)	1	20917840	20939055	21216	1	74229	ENSMUST00000068880.13	-10335	ENSMUSG00000025931	Paqr8	progestin and adipoQ receptor family member VIII	-8035	Gm24171	ENSMUST00000104126.1	intronic	intronic	0.460242	-1.10645	1.59839	0.217106	0.453239
chr1	20907979	20908231	253	*	PND_Adult_NF_peak_2910	871	11.2218	89.8547	87.1812	127	Intron (ENSMUST00000189400.6/74229, intron 1 of 2)	1	20917840	20939055	21216	1	74229	ENSMUST00000068880.13	-9609	ENSMUSG00000025931	Paqr8	progestin and adipoQ receptor family member VIII	-7309	Gm24171	ENSMUST00000104126.1	intronic	intronic	-0.171265	0.908741	0.822262	0.372667	0.609958
chr1	20908555	20908923	369	*	PND_Adult_NF_peak_2911	1320	14.3779	134.936	132.087	144	Intron (ENSMUST00000189400.6/74229, intron 1 of 2)	1	20917840	20939055	21216	1	74229	ENSMUST00000068880.13	-8917	ENSMUSG00000025931	Paqr8	progestin and adipoQ receptor family member VIII	-6617	Gm24171	ENSMUST00000104126.1	intronic	intronic	-0.228173	1.78026	2.59691	0.118885	0.322284
chr1	20912602	20912878	277	*	PND_Adult_NF_peak_2912	1456	15.3626	148.519	145.623	106	Intron (ENSMUST00000189400.6/74229, intron 1 of 2)	1	20917840	20939055	21216	1	74229	ENSMUST00000068880.13	-4962	ENSMUSG00000025931	Paqr8	progestin and adipoQ receptor family member VIII	-2662	Gm24171	ENSMUST00000104126.1	intronic	intronic	0.187824	1.6429	1.40614	0.246191	0.486126
chr1	20933564	20933721	158	*	PND_Adult_NF_peak_2913	244	8.06078	26.7099	24.4421	74	Intron (ENSMUST00000189400.6/74229, intron 2 of 2)	1	20922259	20935756	13498	1	74229	ENSMUST00000187651.1	11305	ENSMUSG00000025931	Paqr8	progestin and adipoQ receptor family member VIII	11305	Paqr8	ENSMUST00000187651.1	intronic	intronic	0.0314791	-0.920634	0.00834326	0.927906	0.967443
chr1	20934355	20934453	99	*	PND_Adult_NF_peak_2914	61	3.80949	8.08716	6.149	33	Intron (ENSMUST00000189400.6/74229, intron 2 of 2)	1	20922259	20935756	13498	1	74229	ENSMUST00000187651.1	12096	ENSMUSG00000025931	Paqr8	progestin and adipoQ receptor family member VIII	-11258	RP23-191A12.6	ENSMUST00000185639.1	intronic	intronic	1.22885	-0.758135	15.2132	0.000587905	0.0136404
chr1	20934605	20934865	261	*	PND_Adult_NF_peak_2915	136	5.55908	15.7458	13.6272	73	5' UTR	1	20922259	20935756	13498	1	74229	ENSMUST00000187651.1	12346	ENSMUSG00000025931	Paqr8	progestin and adipoQ receptor family member VIII	-10846	RP23-191A12.6	ENSMUST00000185639.1	exonic	exonic	0.736901	0.696182	6.23529	0.0238296	0.125479
chr1	20934954	20935362	409	*	PND_Adult_NF_peak_2916	225	7.3392	24.8324	22.5867	198	Exon (ENSMUST00000189400.6/74229, exon 3 of 3)	1	20922259	20935756	13498	1	74229	ENSMUST00000187651.1	12695	ENSMUSG00000025931	Paqr8	progestin and adipoQ receptor family member VIII	-10349	RP23-191A12.6	ENSMUST00000185639.1	exonic	exonic	0.0664209	1.04517	0.146764	0.704694	0.848525
chr1	20939163	20939289	127	*	PND_Adult_NF_peak_2917	457	9.63511	48.1598	45.7089	60	3' UTR	1	20951626	20955527	3902	1	71877	ENSMUST00000160782.1	-12337	ENSMUSG00000041809	Efhc1	EF-hand domain (C-terminal) containing 1	-6422	RP23-191A12.6	ENSMUST00000185639.1	exonic	exonic	0.711469	-0.640558	5.83407	0.0228779	0.122547
chr1	20940192	20940722	531	*	PND_Adult_NF_peak_2918	602	13.528	62.7557	60.2151	193	Distal Intergenic	1	20951626	20955527	3902	1	71877	ENSMUST00000160782.1	-10904	ENSMUSG00000041809	Efhc1	EF-hand domain (C-terminal) containing 1	-4989	RP23-191A12.6	ENSMUST00000185639.1	intergenic	intergenic	0.139574	1.49951	1.0255	0.320349	0.561989
chr1	20951221	20952138	918	*	PND_Adult_NF_peak_2920	4630	22.6107	466.87	463.051	232	Promoter	1	20951626	20955527	3902	1	71877	ENSMUST00000160782.1	0	ENSMUSG00000041809	Efhc1	EF-hand domain (C-terminal) containing 1	0	Efhc1	ENSMUST00000160782.1	exonic	TSS	0.228217	4.98613	7.45686	0.0110769	0.079668
chr1	20981881	20982071	191	*	PND_Adult_NF_peak_2921	194	8.37832	21.6771	19.4682	115	Intron (ENSMUST00000038447.5/71877, intron 9 of 10)	1	20951688	20990841	39154	1	71877	ENSMUST00000038447.5	30193	ENSMUSG00000041809	Efhc1	EF-hand domain (C-terminal) containing 1	30193	Efhc1	ENSMUST00000038447.5	intronic	intronic	0.252044	-1.26823	0.46362	0.501826	0.713152
chr1	21008951	21009102	152	*	PND_Adult_NF_peak_2924	226	9.18913	24.9415	22.6922	45	Intron (ENSMUST00000037998.5/170829, intron 4 of 10)	1	21004313	21043656	39344	2	170829	ENSMUST00000187210.1	34554	ENSMUSG00000041779	Tram2	translocating chain-associating membrane protein 2	-34554	Tram2	ENSMUST00000187210.1	intronic	intronic	-0.619484	-1.02243	0.894496	0.359893	0.598692
chr1	21050525	21050738	214	*	PND_Adult_NF_peak_2925	743	17.4774	76.9253	74.3112	85	Intron (ENSMUST00000037998.5/170829, intron 1 of 10)	1	21004313	21043656	39344	2	170829	ENSMUST00000187210.1	-6869	ENSMUSG00000041779	Tram2	translocating chain-associating membrane protein 2	6869	Tram2	ENSMUST00000187210.1	intronic	intronic	0.12431	-0.0186534	0.321152	0.575671	0.766867
chr1	21050818	21050947	130	*	PND_Adult_NF_peak_2926	74	4.50572	9.38491	7.40483	31	Intron (ENSMUST00000037998.5/170829, intron 1 of 10)	1	21004313	21043656	39344	2	170829	ENSMUST00000187210.1	-7162	ENSMUSG00000041779	Tram2	translocating chain-associating membrane protein 2	7162	Tram2	ENSMUST00000187210.1	intronic	intronic	0.487804	-0.904062	2.15082	0.154226	0.373855
chr1	21070555	21070634	80	*	PND_Adult_NF_peak_2927	18	2.66006	3.52688	1.80112	13	Intron (ENSMUST00000037998.5/170829, intron 1 of 10)	1	20996299	21079229	82931	2	170829	ENSMUST00000037998.5	8595	ENSMUSG00000041779	Tram2	translocating chain-associating membrane protein 2	-8595	Tram2	ENSMUST00000037998.5	intronic	intronic	-0.0590094	-0.850088	0.024562	0.876654	0.942288
chr1	21070718	21071173	456	*	PND_Adult_NF_peak_2928	340	10.6402	36.4049	34.0442	173	Intron (ENSMUST00000037998.5/170829, intron 1 of 10)	1	20996299	21079229	82931	2	170829	ENSMUST00000037998.5	8056	ENSMUSG00000041779	Tram2	translocating chain-associating membrane protein 2	-8056	Tram2	ENSMUST00000037998.5	intronic	intronic	0.100393	0.890559	0.143925	0.708823	0.850921
chr1	21078806	21079832	1027	*	PND_Adult_NF_peak_2929	1919	16.287	195.033	191.986	520	Promoter	1	20996299	21079229	82931	2	170829	ENSMUST00000037998.5	0	ENSMUSG00000041779	Tram2	translocating chain-associating membrane protein 2	0	Tram2	ENSMUST00000037998.5	exonic	TSS	0.149717	4.06955	2.52561	0.123837	0.330247
chr1	21080494	21080651	158	*	PND_Adult_NF_peak_2930	238	4.84758	26.1509	23.888	77	Intron (ENSMUST00000186612.1/ENSMUST00000186612.1, intron 1 of 2)	1	20996299	21079229	82931	2	170829	ENSMUST00000037998.5	-1265	ENSMUSG00000041779	Tram2	translocating chain-associating membrane protein 2	380	RP24-278K16.1	ENSMUST00000186612.1	intronic	proximal <=1000bp	-0.0259466	0.282553	0.0174917	0.895778	0.951982
chr1	21093416	21093710	295	*	PND_Adult_NF_peak_2931	2508	28.351	254.06	250.837	140	Distal Intergenic	1	20996299	21079229	82931	2	170829	ENSMUST00000037998.5	-14187	ENSMUSG00000041779	Tram2	translocating chain-associating membrane protein 2	13302	RP24-278K16.1	ENSMUST00000186612.1	intergenic	intergenic	0.027743	1.26575	0.0296665	0.864554	0.936363
chr1	21096998	21097203	206	*	PND_Adult_NF_peak_2932	362	7.02393	38.656	36.2763	90	Distal Intergenic	1	20996299	21079229	82931	2	170829	ENSMUST00000037998.5	-17769	ENSMUSG00000041779	Tram2	translocating chain-associating membrane protein 2	16884	RP24-278K16.1	ENSMUST00000186612.1	intergenic	intergenic	-0.491632	0.471339	4.09023	0.0536563	0.203254
chr1	21097350	21097441	92	*	PND_Adult_NF_peak_2933	62	3.06136	8.16284	6.22296	65	Distal Intergenic	1	20996299	21079229	82931	2	170829	ENSMUST00000037998.5	-18121	ENSMUSG00000041779	Tram2	translocating chain-associating membrane protein 2	17236	RP24-278K16.1	ENSMUST00000186612.1	intergenic	intergenic	-0.510635	-0.0611009	4.9338	0.0350531	0.158562
chr1	21097671	21097797	127	*	PND_Adult_NF_peak_2934	101	3.71773	12.2007	10.1526	62	Distal Intergenic	1	20996299	21079229	82931	2	170829	ENSMUST00000037998.5	-18442	ENSMUSG00000041779	Tram2	translocating chain-associating membrane protein 2	17557	RP24-278K16.1	ENSMUST00000186612.1	intergenic	intergenic	-0.31317	0.130655	2.25637	0.144853	0.360889
chr1	21101351	21101539	189	*	PND_Adult_NF_peak_2935	1173	17.7711	120.154	117.358	91	Distal Intergenic	1	20996299	21079229	82931	2	170829	ENSMUST00000037998.5	-22122	ENSMUSG00000041779	Tram2	translocating chain-associating membrane protein 2	21237	RP24-278K16.1	ENSMUST00000186612.1	intergenic	intergenic	-0.295737	1.12194	2.3293	0.138926	0.352415
chr1	21101624	21102002	379	*	PND_Adult_NF_peak_2936	153	5.23999	17.4779	15.3331	282	Distal Intergenic	1	20996299	21079229	82931	2	170829	ENSMUST00000037998.5	-22395	ENSMUSG00000041779	Tram2	translocating chain-associating membrane protein 2	21510	RP24-278K16.1	ENSMUST00000186612.1	intergenic	intergenic	0.121939	1.11817	0.602986	0.444297	0.669633
chr1	21124891	21125317	427	*	PND_Adult_NF_peak_2939	196	7.98354	21.8887	19.6777	339	Distal Intergenic	1	20996299	21079229	82931	2	170829	ENSMUST00000037998.5	-45662	ENSMUSG00000041779	Tram2	translocating chain-associating membrane protein 2	44777	RP24-278K16.1	ENSMUST00000186612.1	intergenic	intergenic	0.0616001	0.4673	0.123277	0.728275	0.862637
chr1	21154242	21154968	727	*	PND_Adult_NF_peak_2943	237	9.16533	26.0106	23.7515	440	Distal Intergenic	1	21218575	21230167	11593	1	75712	ENSMUST00000027065.11	-63607	ENSMUSG00000025933	Tmem14a	transmembrane protein 14A	-24020	RP23-80N7.1	ENSMUST00000189119.1	intergenic	intergenic	0.0863494	1.15434	0.311203	0.581611	0.770814
chr1	21155108	21155194	87	*	PND_Adult_NF_peak_2944	58	4.31575	7.79135	5.85981	35	Distal Intergenic	1	21218575	21230167	11593	1	75712	ENSMUST00000027065.11	-63381	ENSMUSG00000025933	Tmem14a	transmembrane protein 14A	-23794	RP23-80N7.1	ENSMUST00000189119.1	intergenic	intergenic	0.0628724	-0.700464	0.0408233	0.841418	0.924469
chr1	21161880	21162077	198	*	PND_Adult_NF_peak_2946	824	12.7544	85.1421	82.4896	101	Distal Intergenic	1	21218575	21230167	11593	1	75712	ENSMUST00000027065.11	-56498	ENSMUSG00000025933	Tmem14a	transmembrane protein 14A	-16911	RP23-80N7.1	ENSMUST00000189119.1	intergenic	intergenic	-0.222524	0.687368	1.14565	0.294084	0.536332
chr1	21162653	21163019	367	*	PND_Adult_NF_peak_2947	130	4.27332	15.1556	13.0492	211	Distal Intergenic	1	21218575	21230167	11593	1	75712	ENSMUST00000027065.11	-55556	ENSMUSG00000025933	Tmem14a	transmembrane protein 14A	-15969	RP23-80N7.1	ENSMUST00000189119.1	intergenic	intergenic	-0.108114	1.04839	0.462804	0.502199	0.713342
chr1	21166277	21166714	438	*	PND_Adult_NF_peak_2948	1049	14.162	107.665	104.917	150	Distal Intergenic	1	21218575	21230167	11593	1	75712	ENSMUST00000027065.11	-51861	ENSMUSG00000025933	Tmem14a	transmembrane protein 14A	-12274	RP23-80N7.1	ENSMUST00000189119.1	intergenic	intergenic	-0.108064	1.88872	0.663037	0.422725	0.652295
chr1	21167173	21167331	159	*	PND_Adult_NF_peak_2949	210	5.939	23.2941	21.0661	86	Distal Intergenic	1	21218575	21230167	11593	1	75712	ENSMUST00000027065.11	-51244	ENSMUSG00000025933	Tmem14a	transmembrane protein 14A	-11657	RP23-80N7.1	ENSMUST00000189119.1	intergenic	intergenic	-0.0610158	-0.115144	0.076107	0.784778	0.894315
chr1	21191792	21191988	197	*	PND_Adult_NF_peak_2950	306	11.081	32.9821	30.65	95	Distal Intergenic	1	21218575	21230167	11593	1	75712	ENSMUST00000027065.11	-26587	ENSMUSG00000025933	Tmem14a	transmembrane protein 14A	12804	RP23-80N7.1	ENSMUST00000189119.1	intergenic	intergenic	0.379018	-0.276132	2.39537	0.13352	0.344489
chr1	21213609	21213784	176	*	PND_Adult_NF_peak_2955	1463	18.5225	149.256	146.357	108	Distal Intergenic	1	21218575	21230167	11593	1	75712	ENSMUST00000027065.11	-4791	ENSMUSG00000025933	Tmem14a	transmembrane protein 14A	-4791	Tmem14a	ENSMUST00000027065.11	intergenic	intergenic	-0.0571096	-0.553972	0.0395082	0.843958	0.925864
chr1	21218378	21218911	534	*	PND_Adult_NF_peak_2956	1826	20.9013	185.681	182.663	419	Promoter	1	21218575	21230167	11593	1	75712	ENSMUST00000027065.11	0	ENSMUSG00000025933	Tmem14a	transmembrane protein 14A	0	Tmem14a	ENSMUST00000027065.11	exonic	TSS	0.0410873	3.14475	0.168299	0.684916	0.836836
chr1	21240003	21240123	121	*	PND_Adult_NF_peak_2958	84	4.20679	10.4834	8.47622	26	Promoter	1	21240589	21265661	25073	1	14859	ENSMUST00000027067.14	-466	ENSMUSG00000025934	Gsta3	glutathione S-transferase, alpha 3	-466	Gsta3	ENSMUST00000027067.14	intergenic	proximal <=1000bp	-0.532787	-0.681638	3.11903	0.0888676	0.272905
chr1	21240294	21240617	324	*	PND_Adult_NF_peak_2959	2440	32.3525	247.239	244.035	137	Promoter	1	21240589	21265661	25073	1	14859	ENSMUST00000027067.14	0	ENSMUSG00000025934	Gsta3	glutathione S-transferase, alpha 3	0	Gsta3	ENSMUST00000027067.14	exonic	TSS	-0.510725	1.74029	11.9483	0.00185338	0.0274631
chr1	21252363	21252841	479	*	PND_Adult_NF_peak_2960	3292	26.6387	332.669	329.223	153	Intron (ENSMUST00000027067.14/14859, intron 2 of 6)	1	21240629	21264846	24218	1	14859	ENSMUST00000124990.2	11734	ENSMUSG00000025934	Gsta3	glutathione S-transferase, alpha 3	-680	Gsta3	ENSMUST00000190711.1	intronic	proximal <=1000bp	0.056521	3.51833	0.230477	0.635098	0.805902
chr1	21271404	21271718	315	*	PND_Adult_NF_peak_2962	853	11.5158	87.9856	85.3201	261	Exon (ENSMUST00000185842.1/ENSMUST00000185842.1, exon 1 of 2)	1	21285608	21298127	12520	2	241041	ENSMUST00000178869.7	26409	ENSMUSG00000025936	Gm4956	predicted gene 4956	0	RP23-80N7.2	ENSMUST00000185842.1	exonic	TSS	-0.231253	1.68355	2.89724	0.100401	0.292694
chr1	21271815	21271998	184	*	PND_Adult_NF_peak_2963	518	8.46648	54.3236	51.8334	101	Distal Intergenic	1	21285608	21298127	12520	2	241041	ENSMUST00000178869.7	26129	ENSMUSG00000025936	Gm4956	predicted gene 4956	222	RP23-80N7.2	ENSMUST00000185842.1	intergenic	proximal <=1000bp	0.0510576	1.6329	0.14383	0.707516	0.850159
chr1	21272149	21272423	275	*	PND_Adult_NF_peak_2964	1337	15.1595	136.609	133.754	136	Exon (ENSMUST00000178379.2/ENSMUST00000178379.2, exon 1 of 2)	1	21285608	21298127	12520	2	241041	ENSMUST00000178869.7	25704	ENSMUSG00000025936	Gm4956	predicted gene 4956	0	RP23-278E1.5	ENSMUST00000178379.2	exonic	TSS	-0.185538	2.0714	2.01764	0.167106	0.391335
chr1	21276285	21276428	144	*	PND_Adult_NF_peak_2965	1411	15.8709	144.008	141.127	77	Distal Intergenic	1	21285608	21298127	12520	2	241041	ENSMUST00000178869.7	21699	ENSMUSG00000025936	Gm4956	predicted gene 4956	3882	RP23-278E1.5	ENSMUST00000178379.2	intergenic	intergenic	0.223204	-0.907957	0.467327	0.500136	0.711946
chr1	21279797	21279979	183	*	PND_Adult_NF_peak_2966	161	6.41635	18.3101	16.1515	64	Distal Intergenic	1	21285608	21298127	12520	2	241041	ENSMUST00000178869.7	18148	ENSMUSG00000025936	Gm4956	predicted gene 4956	7394	RP23-278E1.5	ENSMUST00000178379.2	intergenic	intergenic	0.970947	-0.980793	7.09955	0.0129388	0.0873086
chr1	21303342	21303580	239	*	PND_Adult_NF_peak_2969	378	12.3498	40.2219	37.83	141	Distal Intergenic	1	21285246	21298312	13067	2	241041	ENSMUST00000082032.12	-5030	ENSMUSG00000025936	Gm4956	predicted gene 4956	5030	RP23-278E1.2	ENSMUST00000082032.12	intergenic	intergenic	0.243241	-0.687663	0.762068	0.3905	0.62516
chr1	21333249	21333410	162	*	PND_Adult_NF_peak_2972	109	5.72848	13.0294	10.963	119	Distal Intergenic	1	21349641	21352200	2560	1	368204	ENSMUST00000088407.3	-16231	ENSMUSG00000067750	Khdc1a	KH domain containing 1A	-16231	Khdc1a	ENSMUST00000088407.3	intergenic	intergenic	-0.077051	-1.06802	0.0555525	0.815475	0.911071
chr1	21333591	21333791	201	*	PND_Adult_NF_peak_2973	130	6.34169	15.1243	13.0183	154	Distal Intergenic	1	21349641	21352200	2560	1	368204	ENSMUST00000088407.3	-15850	ENSMUSG00000067750	Khdc1a	KH domain containing 1A	-15850	Khdc1a	ENSMUST00000088407.3	intergenic	intergenic	0.571012	-0.488046	5.13356	0.0318324	0.149675
chr1	21365143	21365522	380	*	PND_Adult_NF_peak_2979	2166	28.5694	219.788	216.665	198	Distal Intergenic	1	21368331	21370845	2515	1	433278	ENSMUST00000070223.5	-2809	ENSMUSG00000041722	Khdc1c	KH domain containing 1C	340	AC115920.7	ENSMUST00000137146.1	intergenic	proximal <=1000bp	0.0285325	1.64472	0.026271	0.872525	0.940307
chr1	21370787	21371006	220	*	PND_Adult_NF_peak_2981	216	8.91886	23.8403	21.6041	142	3' UTR	1	21368331	21370845	2515	1	433278	ENSMUST00000070223.5	2456	ENSMUSG00000041722	Khdc1c	KH domain containing 1C	-1664	AC115920.8	ENSMUST00000142979.1	exonic	exonic	-0.0285646	-1.41424	0.0043403	0.947966	0.976755
chr1	21379877	21380511	635	*	PND_Adult_NF_peak_2983	3370	32.338	340.533	337.064	208	Distal Intergenic	1	21383556	21386373	2818	1	98582	ENSMUST00000147615.1	-3045	ENSMUSG00000085079	Khdc1b	KH domain containing 1B	322	AC115920.9	ENSMUST00000140035.1	intergenic	proximal <=1000bp	0.116195	2.5895	0.88817	0.354461	0.593693
chr1	21393356	21393565	210	*	PND_Adult_NF_peak_2984	2090	34.1503	212.143	209.044	116	Distal Intergenic	1	21383556	21386373	2818	1	98582	ENSMUST00000147615.1	9800	ENSMUSG00000085079	Khdc1b	KH domain containing 1B	2450	AC115920.4	ENSMUST00000126985.2	intergenic	intergenic	-0.157403	1.63204	1.28603	0.266906	0.50843
chr1	21393663	21393751	89	*	PND_Adult_NF_peak_2985	153	6.26749	17.5174	15.3698	41	Distal Intergenic	1	21383556	21386373	2818	1	98582	ENSMUST00000147615.1	10107	ENSMUSG00000085079	Khdc1b	KH domain containing 1B	2757	AC115920.4	ENSMUST00000126985.2	intergenic	intergenic	-0.159548	0.759249	0.839917	0.367661	0.605566
chr1	21402075	21403111	1037	*	PND_Adult_NF_peak_2986	676	16.7085	70.1892	67.6091	919	3' UTR	1	21383556	21386373	2818	1	98582	ENSMUST00000147615.1	18519	ENSMUSG00000085079	Khdc1b	KH domain containing 1B	11169	AC115920.4	ENSMUST00000126985.2	exonic	exonic	-0.0574456	1.85385	0.180209	0.67461	0.830724
chr1	21411315	21411465	151	*	PND_Adult_NF_peak_2987	441	14.054	46.6254	44.1848	75	Intron (ENSMUST00000029667.12/226922, intron 11 of 13)	1	21383556	21386373	2818	1	98582	ENSMUST00000147615.1	27759	ENSMUSG00000085079	Khdc1b	KH domain containing 1B	20409	AC115920.4	ENSMUST00000126985.2	intronic	intronic	0.121168	-0.412771	0.189883	0.666533	0.825522
chr1	21440193	21440470	278	*	PND_Adult_NF_peak_2988	194	8.37832	21.6771	19.4682	104	Intron (ENSMUST00000029667.12/226922, intron 10 of 13)	1	21383556	21386373	2818	1	98582	ENSMUST00000147615.1	56637	ENSMUSG00000085079	Khdc1b	KH domain containing 1B	-16547	RP24-496H1.1	ENSMUST00000192487.1	intronic	intronic	0.243855	-0.503078	0.932581	0.342898	0.583011
chr1	21443439	21443598	160	*	PND_Adult_NF_peak_2989	354	12.1621	37.8126	35.4387	89	Intron (ENSMUST00000029667.12/226922, intron 10 of 13)	1	21383556	21386373	2818	1	98582	ENSMUST00000147615.1	59883	ENSMUSG00000085079	Khdc1b	KH domain containing 1B	-13419	RP24-496H1.1	ENSMUST00000192487.1	intronic	intronic	0.405239	-1.09382	1.38249	0.250102	0.490295
chr1	21460929	21461322	394	*	PND_Adult_NF_peak_2990	759	17.7936	78.5251	75.9034	97	Intron (ENSMUST00000029667.12/226922, intron 9 of 13)	1	21383556	21386373	2818	1	98582	ENSMUST00000147615.1	77373	ENSMUSG00000085079	Khdc1b	KH domain containing 1B	3912	RP24-496H1.1	ENSMUST00000192487.1	intronic	intronic	0.362637	1.25723	4.27072	0.0486439	0.191655
chr1	21461435	21461751	317	*	PND_Adult_NF_peak_2991	69	4.42244	8.90016	6.93689	268	Exon (ENSMUST00000115300.7/226922, exon 10 of 15)	1	21383556	21386373	2818	1	98582	ENSMUST00000147615.1	77879	ENSMUSG00000085079	Khdc1b	KH domain containing 1B	4418	RP24-496H1.1	ENSMUST00000192487.1	exonic	exonic	0.139069	0.677577	0.598378	0.446023	0.671037
chr1	21505666	21505833	168	*	PND_Adult_NF_peak_2992	1093	25.243	112.092	109.327	70	3' UTR	1	21383556	21386373	2818	1	98582	ENSMUST00000147615.1	122110	ENSMUSG00000085079	Khdc1b	KH domain containing 1B	-7223	AC115920.2	ENSMUST00000119064.1	exonic	exonic	-0.310052	0.69244	3.11905	0.0888667	0.272905
chr1	21506259	21506498	240	*	PND_Adult_NF_peak_2993	73	4.77812	9.30809	7.32947	104	Intron (ENSMUST00000029667.12/226922, intron 3 of 13)	1	21383556	21386373	2818	1	98582	ENSMUST00000147615.1	122703	ENSMUSG00000085079	Khdc1b	KH domain containing 1B	-6558	AC115920.2	ENSMUST00000119064.1	intronic	intronic	-0.502148	-0.533602	3.02954	0.0933278	0.280488
chr1	21512473	21512837	365	*	PND_Adult_NF_peak_2994	184	8.10805	20.6158	18.4212	256	Exon (ENSMUST00000119064.1/ENSMUST00000119064.1, exon 1 of 1)	1	21383556	21386373	2818	1	98582	ENSMUST00000147615.1	128917	ENSMUSG00000085079	Khdc1b	KH domain containing 1B	-219	AC115920.2	ENSMUST00000119064.1	exonic	proximal <=1000bp	-0.314415	0.493467	1.7078	0.202889	0.436326
chr1	21513002	21513127	126	*	PND_Adult_NF_peak_2995	260	9.99993	28.3188	26.0322	81	Exon (ENSMUST00000119064.1/ENSMUST00000119064.1, exon 1 of 1)	1	21383556	21386373	2818	1	98582	ENSMUST00000147615.1	129446	ENSMUSG00000085079	Khdc1b	KH domain containing 1B	0	AC115920.2	ENSMUST00000119064.1	exonic	TSS	-0.568012	-0.306069	4.83499	0.0367788	0.163088
chr1	21522132	21522295	164	*	PND_Adult_NF_peak_2997	153	7.29725	17.5188	15.3698	61	Intron (ENSMUST00000029667.12/226922, intron 3 of 13)	1	21383556	21386373	2818	1	98582	ENSMUST00000147615.1	138576	ENSMUSG00000085079	Khdc1b	KH domain containing 1B	9076	AC115920.2	ENSMUST00000119064.1	intronic	intronic	0.369985	-0.939544	1.42548	0.24305	0.482674
chr1	21829954	21830107	154	*	PND_Adult_NF_peak_3006	124	6.48644	14.5631	12.4648	115	Intron (ENSMUST00000029667.12/226922, intron 1 of 13)	1	21577644	21855902	278259	2	226922	ENSMUST00000134505.1	25795	ENSMUSG00000028033	Kcnq5	potassium voltage-gated channel, subfamily Q, member 5	-10407	RP23-322P13.2	ENSMUST00000194737.1	intronic	intronic	0.0278003	-0.343079	0.0107792	0.918089	0.962681
chr1	21830240	21830388	149	*	PND_Adult_NF_peak_3007	106	5.9459	12.6794	10.6183	88	Intron (ENSMUST00000029667.12/226922, intron 1 of 13)	1	21577644	21855902	278259	2	226922	ENSMUST00000134505.1	25514	ENSMUSG00000028033	Kcnq5	potassium voltage-gated channel, subfamily Q, member 5	-10126	RP23-322P13.2	ENSMUST00000194737.1	intronic	intronic	0.0212747	-0.429975	0.00669743	0.935389	0.971121
chr1	21849372	21849594	223	*	PND_Adult_NF_peak_3008	366	12.4323	39.0446	36.6607	111	Intron (ENSMUST00000029667.12/226922, intron 1 of 13)	1	21577644	21855902	278259	2	226922	ENSMUST00000134505.1	6308	ENSMUSG00000028033	Kcnq5	potassium voltage-gated channel, subfamily Q, member 5	-6308	Kcnq5	ENSMUST00000134505.1	intronic	intronic	0.535345	-0.71653	3.25452	0.0825719	0.261463
chr1	21896542	21896780	239	*	PND_Adult_NF_peak_3010	1669	35.9457	169.964	166.996	155	Intron (ENSMUST00000029667.12/226922, intron 1 of 13)	1	21577644	21855902	278259	2	226922	ENSMUST00000134505.1	-40640	ENSMUSG00000028033	Kcnq5	potassium voltage-gated channel, subfamily Q, member 5	40640	Kcnq5	ENSMUST00000134505.1	intronic	intronic	0.12942	0.795777	0.530571	0.472736	0.691797
chr1	21904895	21905128	234	*	PND_Adult_NF_peak_3012	226	9.18913	24.9415	22.6922	139	Intron (ENSMUST00000029667.12/226922, intron 1 of 13)	1	21577644	21855902	278259	2	226922	ENSMUST00000134505.1	-48993	ENSMUSG00000028033	Kcnq5	potassium voltage-gated channel, subfamily Q, member 5	48993	Kcnq5	ENSMUST00000134505.1	intronic	intronic	1.22977	-0.800787	17.4633	0.000282372	0.00869225
chr1	21960694	21960882	189	*	PND_Adult_NF_peak_3014	90	3.60659	11.0307	9.00767	121	Promoter	1	21398403	21961581	563179	2	226922	ENSMUST00000029667.12	699	ENSMUSG00000028033	Kcnq5	potassium voltage-gated channel, subfamily Q, member 5	-699	Kcnq5	ENSMUST00000173404.1	exonic	proximal <=1000bp	-0.208688	0.776662	1.02965	0.319389	0.560968
chr1	21960987	21961560	574	*	PND_Adult_NF_peak_3015	742	10.9504	76.8859	74.272	302	Promoter	1	21398403	21961581	563179	2	226922	ENSMUST00000029667.12	21	ENSMUSG00000028033	Kcnq5	potassium voltage-gated channel, subfamily Q, member 5	-21	Kcnq5	ENSMUST00000173404.1	exonic	proximal <=1000bp	-0.319403	2.19855	6.65255	0.015767	0.0983255
chr1	21961942	21962115	174	*	PND_Adult_NF_peak_3016	121	4.1214	14.2863	12.1965	92	Promoter	1	21398408	21961942	563535	2	226922	ENSMUST00000115300.7	0	ENSMUSG00000028033	Kcnq5	potassium voltage-gated channel, subfamily Q, member 5	0	Kcnq5	ENSMUST00000115300.7	exonic	TSS	0.0575642	0.483951	0.111528	0.741031	0.869778
chr1	21963210	21963392	183	*	PND_Adult_NF_peak_3017	324	6.78342	34.8227	32.4751	105	Distal Intergenic	1	21398408	21961942	563535	2	226922	ENSMUST00000115300.7	-1268	ENSMUSG00000028033	Kcnq5	potassium voltage-gated channel, subfamily Q, member 5	1268	Kcnq5	ENSMUST00000115300.7	intergenic	intergenic	-0.192672	0.54765	1.17167	0.28878	0.531081
chr1	21963651	21963754	104	*	PND_Adult_NF_peak_3018	47	2.83916	6.64615	4.76044	43	Distal Intergenic	1	21398408	21961942	563535	2	226922	ENSMUST00000115300.7	-1709	ENSMUSG00000028033	Kcnq5	potassium voltage-gated channel, subfamily Q, member 5	1709	Kcnq5	ENSMUST00000115300.7	intergenic	intergenic	-0.384286	-0.147083	2.4341	0.130551	0.340095
chr1	21964085	21964200	116	*	PND_Adult_NF_peak_3019	63	3.14574	8.25945	6.31742	29	Distal Intergenic	1	21398408	21961942	563535	2	226922	ENSMUST00000115300.7	-2143	ENSMUSG00000028033	Kcnq5	potassium voltage-gated channel, subfamily Q, member 5	2143	Kcnq5	ENSMUST00000115300.7	intergenic	intergenic	0.574683	-0.808397	3.48247	0.073093	0.243722
chr1	21973223	21973422	200	*	PND_Adult_NF_peak_3020	226	9.18913	24.9415	22.6922	70	Distal Intergenic	1	21398408	21961942	563535	2	226922	ENSMUST00000115300.7	-11281	ENSMUSG00000028033	Kcnq5	potassium voltage-gated channel, subfamily Q, member 5	11281	Kcnq5	ENSMUST00000115300.7	intergenic	intergenic	0.603653	-0.730365	3.9041	0.0586337	0.214253
chr1	22030377	22030611	235	*	PND_Adult_NF_peak_3021	55	4.32429	7.51705	5.59157	99	Exon (ENSMUST00000189850.1/ENSMUST00000189850.1, exon 1 of 1)	1	21398408	21961942	563535	2	226922	ENSMUST00000115300.7	-68435	ENSMUSG00000028033	Kcnq5	potassium voltage-gated channel, subfamily Q, member 5	-4	RP24-78G8.1	ENSMUST00000189850.1	exonic	proximal <=1000bp	0.261545	-0.381098	0.55334	0.464768	0.685715
chr1	22030813	22031005	193	*	PND_Adult_NF_peak_3022	48	4.05403	6.73932	4.84135	24	Distal Intergenic	1	21398408	21961942	563535	2	226922	ENSMUST00000115300.7	-68871	ENSMUSG00000028033	Kcnq5	potassium voltage-gated channel, subfamily Q, member 5	198	RP24-78G8.1	ENSMUST00000189850.1	intergenic	proximal <=1000bp	0.0165224	-0.978204	0.00206657	0.964081	0.984239
chr1	22945056	22945195	140	*	PND_Adult_NF_peak_3045	173	7.83778	19.5687	17.3886	59	Distal Intergenic	1	22533955	22805994	272040	2	116837	ENSMUST00000218140.1	-139062	ENSMUSG00000041670	Rims1	regulating synaptic membrane exocytosis 1	-41930	RP24-495G2.1	ENSMUST00000190510.1	intergenic	intergenic	-0.484812	-0.905895	2.24044	0.146224	0.362834
chr1	22959927	22960103	177	*	PND_Adult_NF_peak_3046	271	10.2702	29.4681	27.1697	96	Distal Intergenic	1	23100473	23102253	1781	2	66755	ENSMUST00000073179.5	142150	ENSMUSG00000073730	Ppp1r14bl	protein phosphatase 1, regulatory inhibitor subunit 14B like	-27022	RP24-495G2.1	ENSMUST00000190510.1	intergenic	intergenic	1.01454	-0.881763	8.89564	0.00605506	0.0558171
chr1	23011982	23012305	324	*	PND_Adult_NF_peak_3048	106	5.9459	12.6794	10.6183	249	Distal Intergenic	1	23100473	23102253	1781	2	66755	ENSMUST00000073179.5	89948	ENSMUSG00000073730	Ppp1r14bl	protein phosphatase 1, regulatory inhibitor subunit 14B like	24857	RP24-495G2.1	ENSMUST00000190510.1	intergenic	intergenic	0.0134762	-1.2339	0.00119158	0.972721	0.988136
chr1	23049611	23049988	378	*	PND_Adult_NF_peak_3051	294	10.8107	31.8	29.4789	202	Exon (ENSMUST00000191045.1/ENSMUST00000191045.1, exon 4 of 4)	1	23100473	23102253	1781	2	66755	ENSMUST00000073179.5	52265	ENSMUSG00000073730	Ppp1r14bl	protein phosphatase 1, regulatory inhibitor subunit 14B like	-52265	RP24-163I14.1	ENSMUST00000073179.5	exonic	exonic	0.325489	0.280416	1.35446	0.257106	0.497987
chr1	23062047	23062304	258	*	PND_Adult_NF_peak_3053	1633	28.233	166.333	163.376	157	Intron (ENSMUST00000191045.1/ENSMUST00000191045.1, intron 3 of 3)	1	23100473	23102253	1781	2	66755	ENSMUST00000073179.5	39949	ENSMUSG00000073730	Ppp1r14bl	protein phosphatase 1, regulatory inhibitor subunit 14B like	-39949	RP24-163I14.1	ENSMUST00000073179.5	intronic	intronic	-0.252855	1.10658	1.97232	0.17178	0.39713
chr1	23100874	23101073	200	*	PND_Adult_NF_peak_3055	247	7.59064	26.9975	24.727	105	3' UTR	1	23100473	23102253	1781	2	66755	ENSMUST00000073179.5	1180	ENSMUSG00000073730	Ppp1r14bl	protein phosphatase 1, regulatory inhibitor subunit 14B like	-1180	RP24-163I14.1	ENSMUST00000073179.5	exonic	exonic	-0.0281828	0.188027	0.0171632	0.896755	0.95246
chr1	23101747	23102363	617	*	PND_Adult_NF_peak_3056	592	12.9232	61.7463	59.2116	531	Promoter	1	23100473	23102253	1781	2	66755	ENSMUST00000073179.5	0	ENSMUSG00000073730	Ppp1r14bl	protein phosphatase 1, regulatory inhibitor subunit 14B like	0	RP24-163I14.1	ENSMUST00000073179.5	exonic	TSS	0.352845	2.0049	1.60883	0.228863	0.466848
chr1	23114963	23115093	131	*	PND_Adult_NF_peak_3058	230	8.84534	25.3296	23.0768	54	Intron (ENSMUST00000191045.1/ENSMUST00000191045.1, intron 3 of 3)	1	23100473	23102253	1781	2	66755	ENSMUST00000073179.5	-12710	ENSMUSG00000073730	Ppp1r14bl	protein phosphatase 1, regulatory inhibitor subunit 14B like	12710	RP24-163I14.1	ENSMUST00000073179.5	intronic	intronic	-0.0451418	-1.13191	0.016671	0.898238	0.953094
chr1	23115369	23115499	131	*	PND_Adult_NF_peak_3059	17	2.71772	3.47753	1.75379	112	Intron (ENSMUST00000191045.1/ENSMUST00000191045.1, intron 3 of 3)	1	23100473	23102253	1781	2	66755	ENSMUST00000073179.5	-13116	ENSMUSG00000073730	Ppp1r14bl	protein phosphatase 1, regulatory inhibitor subunit 14B like	13116	RP24-163I14.1	ENSMUST00000073179.5	intronic	intronic	0.0622145	-0.65425	0.0503631	0.824149	0.915581
chr1	23115875	23116237	363	*	PND_Adult_NF_peak_3060	306	10.5074	33.01	30.6776	270	Intron (ENSMUST00000191045.1/ENSMUST00000191045.1, intron 3 of 3)	1	23100473	23102253	1781	2	66755	ENSMUST00000073179.5	-13622	ENSMUSG00000073730	Ppp1r14bl	protein phosphatase 1, regulatory inhibitor subunit 14B like	13622	RP24-163I14.1	ENSMUST00000073179.5	intronic	intronic	0.199543	1.00118	0.873277	0.359387	0.598294
chr1	23187970	23188176	207	*	PND_Adult_NF_peak_3065	97	5.67564	11.7657	9.72455	76	Intron (ENSMUST00000191045.1/ENSMUST00000191045.1, intron 2 of 3)	1	23272269	23272339	71	1	387225	ENSMUST00000083471.3	-84093	ENSMUSG00000065405	Mir30a	microRNA 30a	-47497	RP24-495G2.2	ENSMUST00000191045.1	intronic	intronic	-0.335046	-1.47368	0.18706	0.671794	0.828862
chr1	23214484	23214752	269	*	PND_Adult_NF_peak_3067	294	10.8107	31.8	29.4789	137	Exon (ENSMUST00000191045.1/ENSMUST00000191045.1, exon 2 of 4)	1	23272269	23272339	71	1	387225	ENSMUST00000083471.3	-57517	ENSMUSG00000065405	Mir30a	microRNA 30a	-20921	RP24-495G2.2	ENSMUST00000191045.1	exonic	exonic	-0.611368	-0.299253	3.59884	0.0691657	0.236072
chr1	23214874	23215005	132	*	PND_Adult_NF_peak_3068	80	5.1351	9.99922	8.00071	90	Intron (ENSMUST00000191045.1/ENSMUST00000191045.1, intron 1 of 3)	1	23272269	23272339	71	1	387225	ENSMUST00000083471.3	-57264	ENSMUSG00000065405	Mir30a	microRNA 30a	-20668	RP24-495G2.2	ENSMUST00000191045.1	intronic	intronic	-0.34752	-1.02461	1.0419	0.316581	0.558236
chr1	23246950	23247221	272	*	PND_Adult_NF_peak_3069	257	9.84153	27.9933	25.7118	108	Distal Intergenic	1	23272269	23272339	71	1	387225	ENSMUST00000083471.3	-25048	ENSMUSG00000065405	Mir30a	microRNA 30a	1739	Gm24176	ENSMUST00000158928.1	intergenic	intergenic	0.19189	0.422967	1.06755	0.31081	0.552675
chr1	23255936	23256992	1057	*	PND_Adult_NF_peak_3070	7568	30.45	761.509	756.85	197	Exon (ENSMUST00000193885.1/ENSMUST00000193885.1, exon 1 of 1)	1	23272269	23272339	71	1	387225	ENSMUST00000083471.3	-15277	ENSMUSG00000065405	Mir30a	microRNA 30a	0	RP23-28L24.5	ENSMUST00000195365.1	exonic	TSS	0.36668	4.9311	15.1266	0.000605268	0.0138912
chr1	23263893	23264057	165	*	PND_Adult_NF_peak_3071	41	3.78376	5.98892	4.12049	116	Distal Intergenic	1	23272269	23272339	71	1	387225	ENSMUST00000083471.3	-8212	ENSMUSG00000065405	Mir30a	microRNA 30a	7486	RP23-28L24.5	ENSMUST00000193885.1	intergenic	intergenic	0.906933	-1.02094	4.70771	0.0396636	0.170201
chr1	23264199	23264400	202	*	PND_Adult_NF_peak_3072	106	5.9459	12.6794	10.6183	60	Distal Intergenic	1	23272269	23272339	71	1	387225	ENSMUST00000083471.3	-7869	ENSMUSG00000065405	Mir30a	microRNA 30a	7792	RP23-28L24.5	ENSMUST00000193885.1	intergenic	intergenic	0.539924	-0.933507	2.26442	0.144167	0.359882
chr1	23321248	23321654	407	*	PND_Adult_NF_peak_3076	264	9.3965	28.778	26.4877	279	Distal Intergenic	1	23291701	23291784	84	1	723964	ENSMUST00000083633.1	29547	ENSMUSG00000065567	Mir30c-2	microRNA 30c-2	-24945	RP23-28L24.9	ENSMUST00000189078.1	intergenic	intergenic	0.282592	0.641897	1.76875	0.194927	0.426609
chr1	23323396	23323547	152	*	PND_Adult_NF_peak_3077	305	9.90952	32.8698	30.5404	67	Distal Intergenic	1	23291701	23291784	84	1	723964	ENSMUST00000083633.1	31695	ENSMUSG00000065567	Mir30c-2	microRNA 30c-2	-23052	RP23-28L24.9	ENSMUST00000189078.1	intergenic	intergenic	0.240475	0.035645	1.10107	0.303478	0.545539
chr1	23330226	23330767	542	*	PND_Adult_NF_peak_3078	4930	33.0197	496.946	493.043	339	Distal Intergenic	1	23291701	23291784	84	1	723964	ENSMUST00000083633.1	38525	ENSMUSG00000065567	Mir30c-2	microRNA 30c-2	-15832	RP23-28L24.9	ENSMUST00000189078.1	intergenic	intergenic	-0.170301	3.70357	3.12159	0.0887437	0.272729
chr1	23335537	23336021	485	*	PND_Adult_NF_peak_3079	4698	31.8799	473.704	469.866	152	Distal Intergenic	1	23291701	23291784	84	1	723964	ENSMUST00000083633.1	43836	ENSMUSG00000065567	Mir30c-2	microRNA 30c-2	-10578	RP23-28L24.9	ENSMUST00000189078.1	intergenic	intergenic	0.0996897	3.50457	0.848563	0.365245	0.603319
chr1	23354532	23354700	169	*	PND_Adult_NF_peak_3080	52	3.97953	7.13446	5.22698	110	Distal Intergenic	1	23369724	23380801	11078	2	70155	ENSMUST00000186064.6	26101	ENSMUSG00000026158	Ogfrl1	opioid growth factor receptor-like 1	7933	RP23-28L24.9	ENSMUST00000189078.1	intergenic	intergenic	0.265307	-0.793708	0.678888	0.417302	0.6478
chr1	23354904	23354996	93	*	PND_Adult_NF_peak_3081	133	6.29289	15.4458	13.3353	28	Distal Intergenic	1	23369724	23380801	11078	2	70155	ENSMUST00000186064.6	25805	ENSMUSG00000026158	Ogfrl1	opioid growth factor receptor-like 1	8305	RP23-28L24.9	ENSMUST00000189078.1	intergenic	intergenic	0.00353531	-0.259381	0.00020472	0.988691	0.995239
chr1	23355925	23356220	296	*	PND_Adult_NF_peak_3082	712	17.5487	73.8105	71.2122	167	Distal Intergenic	1	23369724	23380801	11078	2	70155	ENSMUST00000186064.6	24581	ENSMUSG00000026158	Ogfrl1	opioid growth factor receptor-like 1	9326	RP23-28L24.9	ENSMUST00000189078.1	intergenic	intergenic	0.537268	0.343292	8.19944	0.00807672	0.0662209
chr1	23366853	23367001	149	*	PND_Adult_NF_peak_3084	454	14.3242	47.9188	45.4693	81	3' UTR	1	23369724	23380801	11078	2	70155	ENSMUST00000186064.6	13800	ENSMUSG00000026158	Ogfrl1	opioid growth factor receptor-like 1	-13800	Ogfrl1	ENSMUST00000186064.6	exonic	exonic	0.100676	-1.1747	0.0669249	0.797861	0.901591
chr1	23382545	23383608	1064	*	PND_Adult_NF_peak_3085	4725	31.0931	476.39	472.545	859	Promoter	1	23366424	23383175	16752	2	70155	ENSMUST00000027343.5	0	ENSMUSG00000026158	Ogfrl1	opioid growth factor receptor-like 1	0	Ogfrl1	ENSMUST00000027343.5	exonic	TSS	-0.125873	3.93551	1.3965	0.247775	0.487734
chr1	23392077	23392180	104	*	PND_Adult_NF_peak_3086	95	5.24183	11.6301	9.5969	52	Exon (ENSMUST00000189537.1/ENSMUST00000189537.1, exon 2 of 2)	1	23370268	23397541	27274	2	70155	ENSMUST00000188677.1	5361	ENSMUSG00000026158	Ogfrl1	opioid growth factor receptor-like 1	-5361	Ogfrl1	ENSMUST00000188677.1	exonic	exonic	-0.331949	-0.125731	1.62953	0.212808	0.447986
chr1	23392368	23392651	284	*	PND_Adult_NF_peak_3087	406	12.1307	43.108	40.6931	127	Exon (ENSMUST00000189537.1/ENSMUST00000189537.1, exon 2 of 2)	1	23370268	23397541	27274	2	70155	ENSMUST00000188677.1	4890	ENSMUSG00000026158	Ogfrl1	opioid growth factor receptor-like 1	-4890	Ogfrl1	ENSMUST00000188677.1	exonic	exonic	-0.498692	0.822199	8.96014	0.00589779	0.0549479
chr1	23392749	23393110	362	*	PND_Adult_NF_peak_3088	148	6.61491	17.0108	14.8719	252	5' UTR	1	23370268	23397541	27274	2	70155	ENSMUST00000188677.1	4431	ENSMUSG00000026158	Ogfrl1	opioid growth factor receptor-like 1	-4431	Ogfrl1	ENSMUST00000188677.1	exonic	exonic	0.0497608	0.283762	0.0664941	0.798498	0.901934
chr1	23403023	23403303	281	*	PND_Adult_NF_peak_3090	48	4.05403	6.73932	4.84135	32	Distal Intergenic	1	23370268	23397541	27274	2	70155	ENSMUST00000188677.1	-5482	ENSMUSG00000026158	Ogfrl1	opioid growth factor receptor-like 1	5251	Ogfrl1	ENSMUST00000189537.1	intergenic	intergenic	0.605737	-0.937457	2.59899	0.118744	0.322068
chr1	23425763	23425852	90	*	PND_Adult_NF_peak_3091	63	4.59456	8.32052	6.36926	18	Distal Intergenic	1	23370268	23397541	27274	2	70155	ENSMUST00000188677.1	-28222	ENSMUSG00000026158	Ogfrl1	opioid growth factor receptor-like 1	27991	Ogfrl1	ENSMUST00000189537.1	intergenic	intergenic	0.748539	-1.20251	2.67401	0.114708	0.315938
chr1	23474867	23475199	333	*	PND_Adult_NF_peak_3093	698	19.1891	72.4586	69.8666	243	Distal Intergenic	1	23370268	23397541	27274	2	70155	ENSMUST00000188677.1	-77326	ENSMUSG00000026158	Ogfrl1	opioid growth factor receptor-like 1	-4340	RP24-361E14.1	ENSMUST00000180769.1	intergenic	intergenic	0.0612374	0.14412	0.0710183	0.791916	0.898344
chr1	23524450	23525124	675	*	PND_Adult_NF_peak_3096	762	18.2889	78.8862	76.2628	187	Distal Intergenic	1	23574587	23596664	22078	1	105243890	ENSMUST00000191140.1	-49463	ENSMUSG00000099503	Gm28822	predicted gene 28822	44911	RP24-361E14.1	ENSMUST00000180769.1	intergenic	intergenic	0.510157	1.73545	13.1886	0.00118289	0.020974
chr1	23537012	23537289	278	*	PND_Adult_NF_peak_3097	1912	26.443	194.298	191.253	64	Distal Intergenic	1	23574587	23596664	22078	1	105243890	ENSMUST00000191140.1	-37298	ENSMUSG00000099503	Gm28822	predicted gene 28822	-37298	RP23-25K16.1	ENSMUST00000191140.1	intergenic	intergenic	-0.192547	1.1495	1.68321	0.205647	0.439669
chr1	23539715	23539887	173	*	PND_Adult_NF_peak_3098	1776	23.1146	180.638	177.635	86	Distal Intergenic	1	23574587	23596664	22078	1	105243890	ENSMUST00000191140.1	-34700	ENSMUSG00000099503	Gm28822	predicted gene 28822	-34700	RP23-25K16.1	ENSMUST00000191140.1	intergenic	intergenic	-0.619751	0.969741	13.801	0.000953368	0.0183492
chr1	23542509	23542653	145	*	PND_Adult_NF_peak_3099	66	4.02861	8.6081	6.6509	72	Distal Intergenic	1	23574587	23596664	22078	1	105243890	ENSMUST00000191140.1	-31934	ENSMUSG00000099503	Gm28822	predicted gene 28822	-31934	RP23-25K16.1	ENSMUST00000191140.1	intergenic	intergenic	-0.151555	-0.489788	0.32206	0.575134	0.76654
chr1	23573926	23574013	88	*	PND_Adult_NF_peak_3101	80	5.1351	9.99922	8.00071	47	Promoter	1	23574587	23596664	22078	1	105243890	ENSMUST00000191140.1	-574	ENSMUSG00000099503	Gm28822	predicted gene 28822	-574	RP23-25K16.1	ENSMUST00000191140.1	intergenic	proximal <=1000bp	0.0170161	-0.541334	0.00362471	0.952442	0.978934
chr1	23574461	23574751	291	*	PND_Adult_NF_peak_3102	173	7.83778	19.5687	17.3886	214	Promoter	1	23574587	23596664	22078	1	105243890	ENSMUST00000191140.1	0	ENSMUSG00000099503	Gm28822	predicted gene 28822	0	RP23-25K16.1	ENSMUST00000191140.1	exonic	TSS	-0.0980594	0.00943128	0.115513	0.736822	0.867319
chr1	23604086	23604466	381	*	PND_Adult_NF_peak_3106	205	8.64859	22.752	20.5293	259	Distal Intergenic	1	23574587	23596664	22078	1	105243890	ENSMUST00000191140.1	29499	ENSMUSG00000099503	Gm28822	predicted gene 28822	29499	RP23-25K16.1	ENSMUST00000191140.1	intergenic	intergenic	-0.471073	0.154443	3.69521	0.0653478	0.228332
chr1	23656324	23656618	295	*	PND_Adult_NF_peak_3107	163	7.56752	18.5361	16.3714	215	Distal Intergenic	1	23574587	23596664	22078	1	105243890	ENSMUST00000191140.1	81737	ENSMUSG00000099503	Gm28822	predicted gene 28822	81737	RP23-25K16.1	ENSMUST00000191140.1	intergenic	intergenic	0.257014	-0.301959	1.14735	0.293734	0.535958
chr1	23657051	23657164	114	*	PND_Adult_NF_peak_3108	63	4.59456	8.32052	6.36926	28	Distal Intergenic	1	23574587	23596664	22078	1	105243890	ENSMUST00000191140.1	82464	ENSMUSG00000099503	Gm28822	predicted gene 28822	82464	RP23-25K16.1	ENSMUST00000191140.1	intergenic	intergenic	-0.195975	-1.08516	0.322917	0.574629	0.766144
chr1	23673361	23673658	298	*	PND_Adult_NF_peak_3109	110	5.60216	13.1478	11.0797	35	Distal Intergenic	1	23761753	23815740	53988	1	280645	ENSMUST00000144602.1	-88095	ENSMUSG00000026156	B3gat2	beta-1,3-glucuronyltransferase 2 (glucuronosyltransferase S)	-88095	B3gat2	ENSMUST00000144602.1	intergenic	intergenic	-0.203278	0.320308	0.882061	0.356095	0.595262
chr1	23674104	23674588	485	*	PND_Adult_NF_peak_3110	302	10.0622	32.6239	30.2965	86	Distal Intergenic	1	23761753	23815740	53988	1	280645	ENSMUST00000144602.1	-87165	ENSMUSG00000026156	B3gat2	beta-1,3-glucuronyltransferase 2 (glucuronosyltransferase S)	-87165	B3gat2	ENSMUST00000144602.1	intergenic	intergenic	0.0200875	0.971352	0.0128384	0.910639	0.959095
chr1	23705528	23705767	240	*	PND_Adult_NF_peak_3113	813	21.3312	83.9888	81.3416	167	Distal Intergenic	1	23761753	23815740	53988	1	280645	ENSMUST00000144602.1	-55986	ENSMUSG00000026156	B3gat2	beta-1,3-glucuronyltransferase 2 (glucuronosyltransferase S)	-55986	B3gat2	ENSMUST00000144602.1	intergenic	intergenic	0.209938	-0.107234	0.879516	0.356778	0.595866
chr1	23758760	23759107	348	*	PND_Adult_NF_peak_3115	378	7.17763	40.2864	37.8926	107	Distal Intergenic	1	23761753	23815740	53988	1	280645	ENSMUST00000144602.1	-2646	ENSMUSG00000026156	B3gat2	beta-1,3-glucuronyltransferase 2 (glucuronosyltransferase S)	-2646	B3gat2	ENSMUST00000144602.1	intergenic	intergenic	-0.109625	0.672026	0.28071	0.600634	0.78321
chr1	23761796	23762041	246	*	PND_Adult_NF_peak_3116	184	4.84642	20.6636	18.4685	113	Promoter	1	23761926	23849158	87233	1	280645	ENSMUST00000063663.5	0	ENSMUSG00000026156	B3gat2	beta-1,3-glucuronyltransferase 2 (glucuronosyltransferase S)	0	B3gat2	ENSMUST00000063663.5	exonic	TSS	-0.240163	0.691828	1.41265	0.245128	0.484925
chr1	23762844	23763200	357	*	PND_Adult_NF_peak_3117	2412	22.8138	244.445	241.25	100	Promoter	1	23762011	23815739	53729	1	280645	ENSMUST00000140583.1	833	ENSMUSG00000026156	B3gat2	beta-1,3-glucuronyltransferase 2 (glucuronosyltransferase S)	833	B3gat2	ENSMUST00000140583.1	exonic	proximal <=1000bp	-0.225486	2.16409	3.10929	0.0893412	0.273659
chr1	23776350	23776484	135	*	PND_Adult_NF_peak_3118	85	4.90524	10.565	8.55634	94	Intron (ENSMUST00000144602.1/280645, intron 2 of 2)	1	23762011	23815739	53729	1	280645	ENSMUST00000140583.1	14339	ENSMUSG00000026156	B3gat2	beta-1,3-glucuronyltransferase 2 (glucuronosyltransferase S)	14339	B3gat2	ENSMUST00000140583.1	intronic	intronic	0.0380621	-0.585952	0.0180386	0.894171	0.951063
chr1	23776640	23776956	317	*	PND_Adult_NF_peak_3119	1033	22.2781	106.124	103.382	169	Intron (ENSMUST00000144602.1/280645, intron 2 of 2)	1	23762011	23815739	53729	1	280645	ENSMUST00000140583.1	14629	ENSMUSG00000026156	B3gat2	beta-1,3-glucuronyltransferase 2 (glucuronosyltransferase S)	14629	B3gat2	ENSMUST00000140583.1	intronic	intronic	-0.059625	0.875325	0.130269	0.721006	0.858383
chr1	23785398	23785525	128	*	PND_Adult_NF_peak_3121	105	5.36826	12.6353	10.5802	88	Intron (ENSMUST00000144602.1/280645, intron 2 of 2)	1	23762011	23815739	53729	1	280645	ENSMUST00000140583.1	23387	ENSMUSG00000026156	B3gat2	beta-1,3-glucuronyltransferase 2 (glucuronosyltransferase S)	23387	B3gat2	ENSMUST00000140583.1	intronic	intronic	-0.125906	-1.17665	0.118891	0.732954	0.865131
chr1	23792835	23793049	215	*	PND_Adult_NF_peak_3124	2288	34.1493	231.997	228.838	113	Intron (ENSMUST00000144602.1/280645, intron 2 of 2)	1	23762011	23815739	53729	1	280645	ENSMUST00000140583.1	30824	ENSMUSG00000026156	B3gat2	beta-1,3-glucuronyltransferase 2 (glucuronosyltransferase S)	30824	B3gat2	ENSMUST00000140583.1	intronic	intronic	-0.193005	1.25746	1.48564	0.233601	0.472101
chr1	23793298	23793534	237	*	PND_Adult_NF_peak_3125	100	4.82525	12.0724	10.0263	70	Intron (ENSMUST00000144602.1/280645, intron 2 of 2)	1	23762011	23815739	53729	1	280645	ENSMUST00000140583.1	31287	ENSMUSG00000026156	B3gat2	beta-1,3-glucuronyltransferase 2 (glucuronosyltransferase S)	31287	B3gat2	ENSMUST00000140583.1	intronic	intronic	0.154528	0.720579	0.638644	0.431286	0.659151
chr1	23793899	23793995	97	*	PND_Adult_NF_peak_3126	76	4.20757	9.60675	7.62241	60	Intron (ENSMUST00000144602.1/280645, intron 2 of 2)	1	23762011	23815739	53729	1	280645	ENSMUST00000140583.1	31888	ENSMUSG00000026156	B3gat2	beta-1,3-glucuronyltransferase 2 (glucuronosyltransferase S)	31888	B3gat2	ENSMUST00000140583.1	intronic	intronic	0.245596	-1.1725	0.46822	0.49973	0.711653
chr1	23794724	23794905	182	*	PND_Adult_NF_peak_3127	182	6.56849	20.4578	18.2681	102	Intron (ENSMUST00000144602.1/280645, intron 2 of 2)	1	23762011	23815739	53729	1	280645	ENSMUST00000140583.1	32713	ENSMUSG00000026156	B3gat2	beta-1,3-glucuronyltransferase 2 (glucuronosyltransferase S)	32713	B3gat2	ENSMUST00000140583.1	intronic	intronic	0.395034	-0.896019	0.713328	0.408351	0.64013
chr1	23826442	23826673	232	*	PND_Adult_NF_peak_3128	3786	30.2942	382.234	378.651	131	Intron (ENSMUST00000063663.5/280645, intron 2 of 3)	1	23846178	23847777	1600	2	98366	ENSMUST00000136506.1	21104	ENSMUSG00000026155	Smap1	small ArfGAP 1	-21104	Smap1	ENSMUST00000136506.1	intronic	intronic	-0.0780125	2.03729	0.339371	0.565102	0.759607
chr1	23827178	23827338	161	*	PND_Adult_NF_peak_3129	734	10.0953	76.0207	73.4112	94	Intron (ENSMUST00000063663.5/280645, intron 2 of 3)	1	23846178	23847777	1600	2	98366	ENSMUST00000136506.1	20439	ENSMUSG00000026155	Smap1	small ArfGAP 1	-20439	Smap1	ENSMUST00000136506.1	intronic	intronic	-0.157968	1.54269	1.35699	0.254408	0.495046
chr1	23827478	23827652	175	*	PND_Adult_NF_peak_3130	979	12.0472	100.68	97.9599	109	Intron (ENSMUST00000063663.5/280645, intron 2 of 3)	1	23846178	23847777	1600	2	98366	ENSMUST00000136506.1	20125	ENSMUSG00000026155	Smap1	small ArfGAP 1	-20125	Smap1	ENSMUST00000136506.1	intronic	intronic	-0.628259	1.45977	17.3819	0.00028975	0.00881991
chr1	23829114	23829230	117	*	PND_Adult_NF_peak_3131	71	3.09425	9.08185	7.11475	71	Intron (ENSMUST00000063663.5/280645, intron 2 of 3)	1	23846178	23847777	1600	2	98366	ENSMUST00000136506.1	18547	ENSMUSG00000026155	Smap1	small ArfGAP 1	-18547	Smap1	ENSMUST00000136506.1	intronic	intronic	-0.325563	-0.00247243	2.40456	0.132808	0.343466
chr1	23867538	23867768	231	*	PND_Adult_NF_peak_3132	237	9.45939	26.0552	23.7932	107	Intron (ENSMUST00000149737.7/98366, intron 4 of 10)	1	23848280	23869974	21695	2	98366	ENSMUST00000148710.7	2206	ENSMUSG00000026155	Smap1	small ArfGAP 1	-2206	Smap1	ENSMUST00000148710.7	intronic	intronic	-0.0324546	-0.757738	0.0102825	0.919992	0.963701
chr1	23869324	23869445	122	*	PND_Adult_NF_peak_3133	163	7.56752	18.5361	16.3714	36	Promoter	1	23848280	23869974	21695	2	98366	ENSMUST00000148710.7	529	ENSMUSG00000026155	Smap1	small ArfGAP 1	-529	Smap1	ENSMUST00000148710.7	intronic	proximal <=1000bp	0.322082	-1.18926	0.870712	0.359158	0.598093
chr1	23915591	23915941	351	*	PND_Adult_NF_peak_3137	1059	20.7874	108.667	105.915	182	Intron (ENSMUST00000027339.13/98366, intron 1 of 9)	1	23844846	23909736	64891	2	98366	ENSMUST00000149737.7	-5855	ENSMUSG00000026155	Smap1	small ArfGAP 1	5855	Smap1	ENSMUST00000149737.7	intronic	intronic	0.113577	1.08908	0.444709	0.510606	0.719491
chr1	23916126	23916243	118	*	PND_Adult_NF_peak_3138	141	5.94109	16.3078	14.1818	27	Intron (ENSMUST00000027339.13/98366, intron 1 of 9)	1	23845625	23922317	76693	2	98366	ENSMUST00000027339.13	6074	ENSMUSG00000026155	Smap1	small ArfGAP 1	-6074	Smap1	ENSMUST00000027339.13	intronic	intronic	0.0807873	-0.436603	0.103357	0.750353	0.87487
chr1	23916974	23917089	116	*	PND_Adult_NF_peak_3139	146	5.37122	16.7567	14.621	57	Intron (ENSMUST00000027339.13/98366, intron 1 of 9)	1	23845625	23922317	76693	2	98366	ENSMUST00000027339.13	5228	ENSMUSG00000026155	Smap1	small ArfGAP 1	-5228	Smap1	ENSMUST00000027339.13	intronic	intronic	0.950245	-1.22333	5.84886	0.0227216	0.122026
chr1	23921593	23922555	963	*	PND_Adult_NF_peak_3140	2066	24.9619	209.733	206.641	828	Promoter	1	23845625	23922317	76693	2	98366	ENSMUST00000027339.13	0	ENSMUSG00000026155	Smap1	small ArfGAP 1	0	Smap1	ENSMUST00000027339.13	exonic	TSS	0.314865	2.90833	6.49766	0.0169	0.102523
chr1	23928584	23928800	217	*	PND_Adult_NF_peak_3142	828	21.6215	85.5032	82.8487	101	Distal Intergenic	1	23845625	23922317	76693	2	98366	ENSMUST00000027339.13	-6267	ENSMUSG00000026155	Smap1	small ArfGAP 1	6267	Smap1	ENSMUST00000027339.13	intergenic	intergenic	0.37374	-0.242091	2.2488	0.145502	0.361788
chr1	23934792	23935051	260	*	PND_Adult_NF_peak_3143	824	16.5775	85.124	82.4716	54	Distal Intergenic	1	23845625	23922317	76693	2	98366	ENSMUST00000027339.13	-12475	ENSMUSG00000026155	Smap1	small ArfGAP 1	12475	Smap1	ENSMUST00000027339.13	intergenic	intergenic	-0.330493	1.59298	6.71909	0.0153061	0.0965033
chr1	23935189	23935557	369	*	PND_Adult_NF_peak_3144	525	12.2801	55.0414	52.5464	74	Distal Intergenic	1	23845625	23922317	76693	2	98366	ENSMUST00000027339.13	-12872	ENSMUSG00000026155	Smap1	small ArfGAP 1	12872	Smap1	ENSMUST00000027339.13	intergenic	intergenic	-0.0879744	1.86512	0.430012	0.517619	0.724977
chr1	23947143	23947471	329	*	PND_Adult_NF_peak_3145	283	10.5405	30.6286	28.3187	79	Distal Intergenic	1	23845625	23922317	76693	2	98366	ENSMUST00000027339.13	-24826	ENSMUSG00000026155	Smap1	small ArfGAP 1	24826	Smap1	ENSMUST00000027339.13	intergenic	intergenic	-0.171823	0.723059	0.863879	0.36102	0.599655
chr1	23953552	23953727	176	*	PND_Adult_NF_peak_3146	121	5.94582	14.285	12.1952	68	Distal Intergenic	1	23845625	23922317	76693	2	98366	ENSMUST00000027339.13	-31235	ENSMUSG00000026155	Smap1	small ArfGAP 1	31235	Smap1	ENSMUST00000027339.13	intergenic	intergenic	0.427805	-0.615949	2.23357	0.146819	0.363686
chr1	23954186	23954485	300	*	PND_Adult_NF_peak_3147	127	5.10298	14.892	12.7892	242	Distal Intergenic	1	23845625	23922317	76693	2	98366	ENSMUST00000027339.13	-31869	ENSMUSG00000026155	Smap1	small ArfGAP 1	31869	Smap1	ENSMUST00000027339.13	intergenic	intergenic	0.101863	0.637507	0.301484	0.587537	0.774622
chr1	23958450	23958740	291	*	PND_Adult_NF_peak_3148	133	4.8211	15.4504	13.3399	40	Distal Intergenic	1	23845625	23922317	76693	2	98366	ENSMUST00000027339.13	-36133	ENSMUSG00000026155	Smap1	small ArfGAP 1	36133	Smap1	ENSMUST00000027339.13	intergenic	intergenic	-0.494493	0.622159	7.83472	0.00942129	0.072602
chr1	23958937	23959129	193	*	PND_Adult_NF_peak_3149	1276	19.2474	130.442	127.609	107	Distal Intergenic	1	23845625	23922317	76693	2	98366	ENSMUST00000027339.13	-36620	ENSMUSG00000026155	Smap1	small ArfGAP 1	36620	Smap1	ENSMUST00000027339.13	intergenic	intergenic	-0.420161	1.37641	8.16819	0.0081833	0.0667298
chr1	23959466	23959710	245	*	PND_Adult_NF_peak_3150	471	10.6637	49.6497	47.189	69	Distal Intergenic	1	23845625	23922317	76693	2	98366	ENSMUST00000027339.13	-37149	ENSMUSG00000026155	Smap1	small ArfGAP 1	37149	Smap1	ENSMUST00000027339.13	intergenic	intergenic	0.060307	1.1753	0.11667	0.73536	0.866436
chr1	23968212	23968977	766	*	PND_Adult_NF_peak_3151	602	13.546	62.806	60.2652	309	Distal Intergenic	1	24002966	24005630	2665	2	68002	ENSMUST00000155767.2	36653	ENSMUSG00000026154	Sdhaf4	succinate dehydrogenase complex assembly factor 4	-36528	RP24-287C19.1	ENSMUST00000192339.1	intergenic	intergenic	0.0277325	2.05049	0.0411227	0.840845	0.924224
chr1	24005387	24005809	423	*	PND_Adult_NF_peak_3152	2515	27.5074	254.782	251.556	275	Promoter	1	24002966	24005630	2665	2	68002	ENSMUST00000155767.2	0	ENSMUSG00000026154	Sdhaf4	succinate dehydrogenase complex assembly factor 4	0	RP24-287C19.1	ENSMUST00000192339.1	exonic	TSS	0.392818	2.81348	8.41754	0.00744715	0.0630993
chr1	24050567	24050910	344	*	PND_Adult_NF_peak_3157	1265	28.0993	129.361	126.531	123	Intron (ENSMUST00000188712.6/68187, intron 8 of 20)	1	24011604	24029086	17483	2	68187	ENSMUST00000186331.1	-21481	ENSMUSG00000026153	Fam135a	family with sequence similarity 135, member A	21481	Fam135a	ENSMUST00000186331.1	intronic	intronic	0.700775	1.01162	15.3428	0.000562919	0.0133093
chr1	24086157	24086340	184	*	PND_Adult_NF_peak_3159	134	6.75671	15.5317	13.4158	71	Promoter	1	24011093	24086526	75434	2	68187	ENSMUST00000188712.6	186	ENSMUSG00000026153	Fam135a	family with sequence similarity 135, member A	-186	Fam135a	ENSMUST00000188712.6	intronic	proximal <=1000bp	0.907915	-0.796714	6.97691	0.0136549	0.0901507
chr1	24099471	24100729	1259	*	PND_Adult_NF_peak_3160	2272	16.7359	230.422	227.267	799	Promoter	1	24011591	24100182	88592	2	68187	ENSMUST00000187369.6	0	ENSMUSG00000026153	Fam135a	family with sequence similarity 135, member A	0	Fam135a	ENSMUST00000187369.6	exonic	TSS	0.280806	4.32648	10.3651	0.00337352	0.0392588
chr1	24101018	24101392	375	*	PND_Adult_NF_peak_3161	135	3.50393	15.6319	13.5148	129	Promoter	1	24051764	24100341	48578	2	68187	ENSMUST00000185525.1	-677	ENSMUSG00000026153	Fam135a	family with sequence similarity 135, member A	393	RP23-255J24.2	ENSMUST00000192408.1	exonic	proximal <=1000bp	0.24865	1.56466	3.04083	0.092751	0.279528
chr1	24107400	24107921	522	*	PND_Adult_NF_peak_3162	248	8.88833	27.0759	24.8047	465	Distal Intergenic	1	24051764	24100341	48578	2	68187	ENSMUST00000185525.1	-7059	ENSMUSG00000026153	Fam135a	family with sequence similarity 135, member A	6775	RP23-255J24.2	ENSMUST00000192408.1	intergenic	intergenic	0.0194622	1.02737	0.0159449	0.900466	0.954095
chr1	24108077	24108217	141	*	PND_Adult_NF_peak_3163	31	3.22643	4.95236	3.13904	85	Distal Intergenic	1	24051764	24100341	48578	2	68187	ENSMUST00000185525.1	-7736	ENSMUSG00000026153	Fam135a	family with sequence similarity 135, member A	7452	RP23-255J24.2	ENSMUST00000192408.1	intergenic	intergenic	0.0740761	-0.757984	0.0652272	0.800383	0.903024
chr1	24133779	24134271	493	*	PND_Adult_NF_peak_3166	817	15.2691	84.3852	81.736	221	Distal Intergenic	1	24051764	24100341	48578	2	68187	ENSMUST00000185525.1	-33438	ENSMUSG00000026153	Fam135a	family with sequence similarity 135, member A	8504	RP23-255J24.1	ENSMUST00000180661.1	intergenic	intergenic	-0.209396	1.51155	1.3884	0.249458	0.489578
chr1	24134980	24135120	141	*	PND_Adult_NF_peak_3167	169	5.93449	19.1598	16.9878	76	Distal Intergenic	1	24051764	24100341	48578	2	68187	ENSMUST00000185525.1	-34639	ENSMUSG00000026153	Fam135a	family with sequence similarity 135, member A	9705	RP23-255J24.1	ENSMUST00000180661.1	intergenic	intergenic	0.129136	-1.01833	0.119677	0.732109	0.864824
chr1	24137196	24137413	218	*	PND_Adult_NF_peak_3168	1502	23.3726	153.125	150.213	109	Distal Intergenic	1	24051764	24100341	48578	2	68187	ENSMUST00000185525.1	-36855	ENSMUSG00000026153	Fam135a	family with sequence similarity 135, member A	11921	RP23-255J24.1	ENSMUST00000180661.1	intergenic	intergenic	-0.0769495	1.56306	0.267632	0.609203	0.78886
chr1	24153134	24153594	461	*	PND_Adult_NF_peak_3169	106	5.9459	12.6794	10.6183	86	Distal Intergenic	1	24177610	24252684	75075	1	12839	ENSMUST00000054588.14	-24016	ENSMUSG00000026147	Col9a1	collagen, type IX, alpha 1	-24016	Col9a1	ENSMUST00000054588.14	intergenic	intergenic	0.169621	-0.18191	0.496972	0.486965	0.702435
chr1	24175998	24176389	392	*	PND_Adult_NF_peak_3173	842	17.5219	86.9294	84.2689	106	Distal Intergenic	1	24177610	24252684	75075	1	12839	ENSMUST00000054588.14	-1221	ENSMUSG00000026147	Col9a1	collagen, type IX, alpha 1	-1221	Col9a1	ENSMUST00000054588.14	intergenic	intergenic	-0.16848	1.33577	1.41514	0.244722	0.484495
chr1	24176631	24176832	202	*	PND_Adult_NF_peak_3174	584	13.9587	61.0072	58.477	104	Promoter	1	24177610	24252684	75075	1	12839	ENSMUST00000054588.14	-778	ENSMUSG00000026147	Col9a1	collagen, type IX, alpha 1	-778	Col9a1	ENSMUST00000054588.14	intergenic	proximal <=1000bp	-0.114528	0.787005	0.439659	0.512997	0.721357
chr1	24195241	24195754	514	*	PND_Adult_NF_peak_3176	129	6.12735	15.0881	12.9826	369	Promoter	1	24195187	24252684	57498	1	12839	ENSMUST00000088349.2	54	ENSMUSG00000026147	Col9a1	collagen, type IX, alpha 1	54	Col9a1	ENSMUST00000088349.2	exonic	proximal <=1000bp	0.105087	1.06261	0.468379	0.499658	0.711595
chr1	24195879	24196332	454	*	PND_Adult_NF_peak_3177	195	7.70938	21.7922	19.5822	82	Promoter	1	24197017	24220785	23769	1	12839	ENSMUST00000124600.1	-685	ENSMUSG00000026147	Col9a1	collagen, type IX, alpha 1	-685	Col9a1	ENSMUST00000124600.1	intronic	proximal <=1000bp	-0.0779558	1.07984	0.227971	0.636935	0.807119
chr1	24218517	24218705	189	*	PND_Adult_NF_peak_3178	500	12.3739	52.5556	50.0762	108	Intron (ENSMUST00000054588.14/12839, intron 20 of 37)	1	24229517	24230955	1439	1	12839	ENSMUST00000147902.1	-10812	ENSMUSG00000026147	Col9a1	collagen, type IX, alpha 1	-10812	Col9a1	ENSMUST00000147902.1	intronic	intronic	0.700108	-0.296319	7.44899	0.0111145	0.0798403
chr1	24219149	24219366	218	*	PND_Adult_NF_peak_3179	2376	36.457	240.811	237.626	63	Intron (ENSMUST00000054588.14/12839, intron 20 of 37)	1	24229517	24230955	1439	1	12839	ENSMUST00000147902.1	-10151	ENSMUSG00000026147	Col9a1	collagen, type IX, alpha 1	-10151	Col9a1	ENSMUST00000147902.1	intronic	intronic	-0.00510557	1.7395	0.00120447	0.972574	0.988057
chr1	24245815	24245992	178	*	PND_Adult_NF_peak_3181	4083	45.7973	412.048	408.382	65	Intron (ENSMUST00000054588.14/12839, intron 37 of 37)	1	24229517	24230955	1439	1	12839	ENSMUST00000147902.1	16298	ENSMUSG00000026147	Col9a1	collagen, type IX, alpha 1	16298	Col9a1	ENSMUST00000147902.1	intronic	intronic	-0.338585	2.32384	6.52873	0.0166657	0.101664
chr1	24246133	24246226	94	*	PND_Adult_NF_peak_3182	226	6.69879	24.884	22.6379	42	Intron (ENSMUST00000054588.14/12839, intron 37 of 37)	1	24229517	24230955	1439	1	12839	ENSMUST00000147902.1	16616	ENSMUSG00000026147	Col9a1	collagen, type IX, alpha 1	16616	Col9a1	ENSMUST00000147902.1	intronic	intronic	-0.510217	1.32236	9.20749	0.00533463	0.0517423
chr1	24249260	24249410	151	*	PND_Adult_NF_peak_3183	216	6.65769	23.8523	21.616	83	Intron (ENSMUST00000054588.14/12839, intron 37 of 37)	1	24229517	24230955	1439	1	12839	ENSMUST00000147902.1	19743	ENSMUSG00000026147	Col9a1	collagen, type IX, alpha 1	19743	Col9a1	ENSMUST00000147902.1	intronic	intronic	0.40319	-0.988696	1.18315	0.28648	0.52869
chr1	24263274	24263611	338	*	PND_Adult_NF_peak_3184	182	7.55703	20.4666	18.2767	250	Exon (ENSMUST00000144297.1/12823, exon 40 of 40)	1	24229517	24230955	1439	1	12839	ENSMUST00000147902.1	33757	ENSMUSG00000026147	Col9a1	collagen, type IX, alpha 1	33757	Col9a1	ENSMUST00000147902.1	exonic	exonic	-0.478273	0.867325	6.96699	0.0137147	0.0904139
chr1	24264621	24265141	521	*	PND_Adult_NF_peak_3185	427	12.4394	45.1808	42.7515	455	3' UTR	1	24229517	24230955	1439	1	12839	ENSMUST00000147902.1	35104	ENSMUSG00000026147	Col9a1	collagen, type IX, alpha 1	35104	Col9a1	ENSMUST00000147902.1	exonic	exonic	-0.520262	1.05628	9.09818	0.00557594	0.0531159
chr1	24288926	24289124	199	*	PND_Adult_NF_peak_3186	69	4.44449	8.94647	6.98225	37	Intron (ENSMUST00000144297.1/12823, intron 33 of 39)	1	24229517	24230955	1439	1	12839	ENSMUST00000147902.1	59409	ENSMUSG00000026147	Col9a1	collagen, type IX, alpha 1	59409	Col9a1	ENSMUST00000147902.1	intronic	intronic	0.267932	-0.59603	0.78688	0.383001	0.618738
chr1	24289229	24289689	461	*	PND_Adult_NF_peak_3187	172	7.10528	19.4684	17.2929	329	Exon (ENSMUST00000144297.1/12823, exon 33 of 40)	1	24229517	24230955	1439	1	12839	ENSMUST00000147902.1	59712	ENSMUSG00000026147	Col9a1	collagen, type IX, alpha 1	59712	Col9a1	ENSMUST00000147902.1	exonic	exonic	0.0584303	0.777045	0.0870253	0.770285	0.885837
chr1	24289957	24290105	149	*	PND_Adult_NF_peak_3188	93	5.13677	11.4061	9.37671	78	Intron (ENSMUST00000144297.1/12823, intron 31 of 39)	1	24229517	24230955	1439	1	12839	ENSMUST00000147902.1	60440	ENSMUSG00000026147	Col9a1	collagen, type IX, alpha 1	60440	Col9a1	ENSMUST00000147902.1	intronic	intronic	-0.397729	0.00703785	2.72124	0.110791	0.309859
chr1	24290230	24290423	194	*	PND_Adult_NF_peak_3189	365	11.1762	38.921	36.5395	49	Intron (ENSMUST00000144297.1/12823, intron 31 of 39)	1	24229517	24230955	1439	1	12839	ENSMUST00000147902.1	60713	ENSMUSG00000026147	Col9a1	collagen, type IX, alpha 1	60713	Col9a1	ENSMUST00000147902.1	intronic	intronic	-0.244487	-0.0407678	0.972269	0.333006	0.573701
chr1	24300844	24300962	119	*	PND_Adult_NF_peak_3191	298	8.93654	32.203	29.8788	51	Intron (ENSMUST00000144297.1/12823, intron 28 of 39)	1	24229517	24230955	1439	1	12839	ENSMUST00000147902.1	71327	ENSMUSG00000026147	Col9a1	collagen, type IX, alpha 1	71327	Col9a1	ENSMUST00000147902.1	intronic	intronic	-0.423218	-1.36311	1.11569	0.300355	0.542427
chr1	24302736	24302998	263	*	PND_Adult_NF_peak_3192	2752	42.6232	278.556	275.262	113	Intron (ENSMUST00000144297.1/12823, intron 26 of 39)	1	24229517	24230955	1439	1	12839	ENSMUST00000147902.1	73219	ENSMUSG00000026147	Col9a1	collagen, type IX, alpha 1	73219	Col9a1	ENSMUST00000147902.1	intronic	intronic	-0.265471	1.53666	3.75195	0.0634422	0.224126
chr1	24311034	24311140	107	*	PND_Adult_NF_peak_3193	66	4.58266	8.60803	6.65084	35	Intron (ENSMUST00000144297.1/12823, intron 23 of 39)	1	24229517	24230955	1439	1	12839	ENSMUST00000147902.1	81517	ENSMUSG00000026147	Col9a1	collagen, type IX, alpha 1	81517	Col9a1	ENSMUST00000147902.1	intronic	intronic	0.259617	-1.10349	0.219123	0.645319	0.812253
chr1	24311546	24311746	201	*	PND_Adult_NF_peak_3194	678	17.8713	70.4324	67.8512	117	Intron (ENSMUST00000144297.1/12823, intron 23 of 39)	1	24229517	24230955	1439	1	12839	ENSMUST00000147902.1	82029	ENSMUSG00000026147	Col9a1	collagen, type IX, alpha 1	82029	Col9a1	ENSMUST00000147902.1	intronic	intronic	-0.547683	0.523947	5.42363	0.0278812	0.137867
chr1	24312021	24312221	201	*	PND_Adult_NF_peak_3195	71	4.66837	9.09117	7.12388	72	Exon (ENSMUST00000144297.1/12823, exon 23 of 40)	1	24229517	24230955	1439	1	12839	ENSMUST00000147902.1	82504	ENSMUSG00000026147	Col9a1	collagen, type IX, alpha 1	82504	Col9a1	ENSMUST00000147902.1	exonic	exonic	-0.385855	0.383651	2.77081	0.107744	0.304846
chr1	24312324	24312503	180	*	PND_Adult_NF_peak_3196	178	7.56815	20.0003	17.8155	68	Exon (ENSMUST00000144297.1/12823, exon 21 of 40)	1	24229517	24230955	1439	1	12839	ENSMUST00000147902.1	82807	ENSMUSG00000026147	Col9a1	collagen, type IX, alpha 1	82807	Col9a1	ENSMUST00000147902.1	exonic	exonic	-0.164291	-0.0517595	0.453521	0.506482	0.716503
chr1	24319641	24319853	213	*	PND_Adult_NF_peak_3197	857	22.162	88.4631	85.7953	81	Intron (ENSMUST00000144297.1/12823, intron 16 of 39)	1	24229517	24230955	1439	1	12839	ENSMUST00000147902.1	90124	ENSMUSG00000026147	Col9a1	collagen, type IX, alpha 1	90124	Col9a1	ENSMUST00000147902.1	intronic	intronic	0.53541	-0.477483	3.88507	0.0592121	0.215538
chr1	24330175	24330465	291	*	PND_Adult_NF_peak_3199	81	4.58194	10.1828	8.18106	269	Intron (ENSMUST00000144297.1/12823, intron 8 of 39)	1	24229517	24230955	1439	1	12839	ENSMUST00000147902.1	100658	ENSMUSG00000026147	Col9a1	collagen, type IX, alpha 1	100658	Col9a1	ENSMUST00000147902.1	intronic	intronic	0.0614997	0.424122	0.113429	0.738918	0.868418
chr1	24330549	24330951	403	*	PND_Adult_NF_peak_3200	447	12.1613	47.2341	44.7899	310	Intron (ENSMUST00000144297.1/12823, intron 8 of 39)	1	24229517	24230955	1439	1	12839	ENSMUST00000147902.1	101032	ENSMUSG00000026147	Col9a1	collagen, type IX, alpha 1	101032	Col9a1	ENSMUST00000147902.1	intronic	intronic	0.0301806	1.61456	0.0541017	0.817856	0.912253
chr1	24331087	24331283	197	*	PND_Adult_NF_peak_3201	358	10.6353	38.2642	35.8872	71	Intron (ENSMUST00000144297.1/12823, intron 8 of 39)	1	24229517	24230955	1439	1	12839	ENSMUST00000147902.1	101570	ENSMUSG00000026147	Col9a1	collagen, type IX, alpha 1	101570	Col9a1	ENSMUST00000147902.1	intronic	intronic	0.160132	0.262735	0.615993	0.43948	0.665805
chr1	24337431	24337813	383	*	PND_Adult_NF_peak_3202	558	15.317	58.3209	55.8063	322	Intron (ENSMUST00000144297.1/12823, intron 7 of 39)	1	24229517	24230955	1439	1	12839	ENSMUST00000147902.1	107914	ENSMUSG00000026147	Col9a1	collagen, type IX, alpha 1	107914	Col9a1	ENSMUST00000147902.1	intronic	intronic	-0.330833	1.32292	4.83227	0.0368276	0.163204
chr1	24338251	24338367	117	*	PND_Adult_NF_peak_3203	67	4.50289	8.75981	6.79947	91	Intron (ENSMUST00000144297.1/12823, intron 6 of 39)	1	24229517	24230955	1439	1	12839	ENSMUST00000147902.1	108734	ENSMUSG00000026147	Col9a1	collagen, type IX, alpha 1	108734	Col9a1	ENSMUST00000147902.1	intronic	intronic	0.563712	-0.853635	3.32874	0.0793398	0.255352
chr1	24338505	24338613	109	*	PND_Adult_NF_peak_3204	33	3.33863	5.16572	3.34554	16	Intron (ENSMUST00000144297.1/12823, intron 6 of 39)	1	24229517	24230955	1439	1	12839	ENSMUST00000147902.1	108988	ENSMUSG00000026147	Col9a1	collagen, type IX, alpha 1	108988	Col9a1	ENSMUST00000147902.1	intronic	intronic	0.193783	-0.520593	0.444247	0.510824	0.719677
chr1	24349795	24349997	203	*	PND_Adult_NF_peak_3205	656	18.3783	68.2167	65.6466	98	Intron (ENSMUST00000144297.1/12823, intron 6 of 39)	1	24261890	24452745	190856	2	12823	ENSMUST00000144297.1	102748	ENSMUSG00000026141	Col19a1	collagen, type XIX, alpha 1	-102748	Col19a1	ENSMUST00000144297.1	intronic	intronic	-0.0115335	-0.209345	0.00185485	0.965969	0.984952
chr1	24361213	24361297	85	*	PND_Adult_NF_peak_3206	41	3.78376	5.98892	4.12049	38	Intron (ENSMUST00000144297.1/12823, intron 5 of 39)	1	24261890	24452745	190856	2	12823	ENSMUST00000144297.1	91448	ENSMUSG00000026141	Col19a1	collagen, type XIX, alpha 1	-91448	Col19a1	ENSMUST00000144297.1	intronic	intronic	-0.156475	-0.950589	0.204852	0.654505	0.817953
chr1	24361385	24361697	313	*	PND_Adult_NF_peak_3207	343	11.6339	36.7043	34.3398	207	Intron (ENSMUST00000144297.1/12823, intron 5 of 39)	1	24261890	24452745	190856	2	12823	ENSMUST00000144297.1	91048	ENSMUSG00000026141	Col19a1	collagen, type XIX, alpha 1	-91048	Col19a1	ENSMUST00000144297.1	intronic	intronic	-0.0619965	0.442104	0.0871915	0.770073	0.885717
chr1	24362375	24362507	133	*	PND_Adult_NF_peak_3208	59	4.36129	7.8787	5.9452	63	Intron (ENSMUST00000144297.1/12823, intron 5 of 39)	1	24261890	24452745	190856	2	12823	ENSMUST00000144297.1	90238	ENSMUSG00000026141	Col19a1	collagen, type XIX, alpha 1	-90238	Col19a1	ENSMUST00000144297.1	intronic	intronic	-0.509283	-0.930948	2.30675	0.140619	0.354711
chr1	24368696	24368839	144	*	PND_Adult_NF_peak_3211	115	6.21617	13.6121	11.532	32	Intron (ENSMUST00000144297.1/12823, intron 5 of 39)	1	24261890	24452745	190856	2	12823	ENSMUST00000144297.1	83906	ENSMUSG00000026141	Col19a1	collagen, type XIX, alpha 1	-83906	Col19a1	ENSMUST00000144297.1	intronic	intronic	0.22299	-0.321082	0.687951	0.414249	0.645089
chr1	24375987	24376141	155	*	PND_Adult_NF_peak_3213	88	3.70008	10.8621	8.84801	71	Intron (ENSMUST00000144297.1/12823, intron 4 of 39)	1	24261890	24452745	190856	2	12823	ENSMUST00000144297.1	76604	ENSMUSG00000026141	Col19a1	collagen, type XIX, alpha 1	-76604	Col19a1	ENSMUST00000144297.1	intronic	intronic	-0.529098	0.274396	6.42875	0.0174326	0.104362
chr1	24376295	24376561	267	*	PND_Adult_NF_peak_3214	6719	54.2409	676.345	671.943	121	Intron (ENSMUST00000144297.1/12823, intron 4 of 39)	1	24261890	24452745	190856	2	12823	ENSMUST00000144297.1	76184	ENSMUSG00000026141	Col19a1	collagen, type XIX, alpha 1	-76184	Col19a1	ENSMUST00000144297.1	intronic	intronic	-0.287131	3.06128	5.51886	0.0265062	0.133669
chr1	24376917	24377060	144	*	PND_Adult_NF_peak_3215	60	3.17403	7.94176	6.00685	18	Intron (ENSMUST00000144297.1/12823, intron 4 of 39)	1	24261890	24452745	190856	2	12823	ENSMUST00000144297.1	75685	ENSMUSG00000026141	Col19a1	collagen, type XIX, alpha 1	-75685	Col19a1	ENSMUST00000144297.1	intronic	intronic	0.199558	-0.451856	0.504199	0.483844	0.700189
chr1	24433207	24433447	241	*	PND_Adult_NF_peak_3218	260	9.99993	28.3188	26.0322	77	Intron (ENSMUST00000144297.1/12823, intron 2 of 39)	1	24261890	24452745	190856	2	12823	ENSMUST00000144297.1	19298	ENSMUSG00000026141	Col19a1	collagen, type XIX, alpha 1	-19298	Col19a1	ENSMUST00000144297.1	intronic	intronic	0.131907	-1.1699	0.154108	0.69777	0.844333
chr1	24452324	24452456	133	*	PND_Adult_NF_peak_3219	216	8.91886	23.8403	21.6041	43	Promoter	1	24261890	24452745	190856	2	12823	ENSMUST00000144297.1	289	ENSMUSG00000026141	Col19a1	collagen, type XIX, alpha 1	-289	Col19a1	ENSMUST00000144297.1	intronic	proximal <=1000bp	-0.794137	-0.310272	10.4507	0.00326338	0.0384642
chr1	24452594	24452815	222	*	PND_Adult_NF_peak_3220	63	4.59456	8.32052	6.36926	36	Promoter	1	24261890	24452745	190856	2	12823	ENSMUST00000144297.1	0	ENSMUSG00000026141	Col19a1	collagen, type XIX, alpha 1	0	Col19a1	ENSMUST00000144297.1	exonic	TSS	0.396211	-0.197754	2.05299	0.163565	0.386533
chr1	24453335	24453507	173	*	PND_Adult_NF_peak_3221	97	5.67564	11.7657	9.72455	130	Promoter	1	24261890	24452745	190856	2	12823	ENSMUST00000144297.1	-590	ENSMUSG00000026141	Col19a1	collagen, type XIX, alpha 1	590	Col19a1	ENSMUST00000144297.1	intronic	proximal <=1000bp	0.222146	-0.597852	0.623947	0.436575	0.663408
chr1	24550090	24550320	231	*	PND_Adult_NF_peak_3224	82	4.77777	10.2918	8.2881	27	Intron (ENSMUST00000115244.8/12823, intron 4 of 50)	1	24279770	24587411	307642	2	12823	ENSMUST00000051344.5	37091	ENSMUSG00000026141	Col19a1	collagen, type XIX, alpha 1	1113	Gm26418	ENSMUST00000104275.1	intronic	intronic	-0.0234365	0.501746	0.013529	0.908278	0.957903
chr1	24550409	24550726	318	*	PND_Adult_NF_peak_3225	240	8.54603	26.2935	24.0293	115	Intron (ENSMUST00000115244.8/12823, intron 4 of 50)	1	24279770	24587411	307642	2	12823	ENSMUST00000051344.5	36685	ENSMUSG00000026141	Col19a1	collagen, type XIX, alpha 1	1432	Gm26418	ENSMUST00000104275.1	intronic	intronic	0.0798926	0.530416	0.13189	0.719366	0.857309
chr1	24551162	24551378	217	*	PND_Adult_NF_peak_3226	948	21.3685	97.5498	94.8427	125	Intron (ENSMUST00000115244.8/12823, intron 4 of 50)	1	24279770	24587411	307642	2	12823	ENSMUST00000051344.5	36033	ENSMUSG00000026141	Col19a1	collagen, type XIX, alpha 1	2185	Gm26418	ENSMUST00000104275.1	intronic	intronic	0.0673858	0.426283	0.111854	0.740668	0.869619
chr1	24558109	24558334	226	*	PND_Adult_NF_peak_3227	205	8.64859	22.752	20.5293	117	Intron (ENSMUST00000115244.8/12823, intron 4 of 50)	1	24279770	24587411	307642	2	12823	ENSMUST00000051344.5	29077	ENSMUSG00000026141	Col19a1	collagen, type XIX, alpha 1	9132	Gm26418	ENSMUST00000104275.1	intronic	intronic	0.0720163	0.0245998	0.0735606	0.788341	0.896268
chr1	24584078	24584204	127	*	PND_Adult_NF_peak_3228	133	5.29272	15.4158	13.3058	42	Intron (ENSMUST00000115244.8/12823, intron 1 of 50)	1	24279770	24587411	307642	2	12823	ENSMUST00000051344.5	3207	ENSMUSG00000026141	Col19a1	collagen, type XIX, alpha 1	-3207	Col19a1	ENSMUST00000051344.5	intronic	intronic	0.467128	-1.3435	1.48279	0.234038	0.47263
chr1	24585127	24585231	105	*	PND_Adult_NF_peak_3229	17	2.40578	3.43954	1.71735	0	Intron (ENSMUST00000115244.8/12823, intron 1 of 50)	1	24279770	24587411	307642	2	12823	ENSMUST00000051344.5	2180	ENSMUSG00000026141	Col19a1	collagen, type XIX, alpha 1	-2180	Col19a1	ENSMUST00000051344.5	intronic	intronic	-0.219383	-0.654751	0.359949	0.553801	0.751605
chr1	24586434	24587022	589	*	PND_Adult_NF_peak_3230	314	8.52087	33.8173	31.4789	134	Promoter	1	24279770	24587411	307642	2	12823	ENSMUST00000051344.5	389	ENSMUSG00000026141	Col19a1	collagen, type XIX, alpha 1	-389	Col19a1	ENSMUST00000051344.5	intronic	proximal <=1000bp	-0.187205	1.46691	2.07752	0.161161	0.383196
chr1	24587303	24587497	195	*	PND_Adult_NF_peak_3231	174	6.10564	19.6416	17.4609	83	Promoter	1	24279770	24587411	307642	2	12823	ENSMUST00000051344.5	0	ENSMUSG00000026141	Col19a1	collagen, type XIX, alpha 1	0	Col19a1	ENSMUST00000051344.5	exonic	TSS	-0.171984	0.365636	0.571292	0.456392	0.67914
chr1	24594071	24594310	240	*	PND_Adult_NF_peak_3232	165	6.76812	18.7	16.5333	149	Exon (ENSMUST00000187481.1/ENSMUST00000187481.1, exon 1 of 1)	1	24263994	24587472	323479	2	12823	ENSMUST00000115244.8	-6599	ENSMUSG00000026141	Col19a1	collagen, type XIX, alpha 1	-1113	Tubb4b-ps2	ENSMUST00000187481.1	exonic	exonic	-0.054158	-0.161727	0.0491887	0.826176	0.916751
chr1	24594816	24594928	113	*	PND_Adult_NF_peak_3233	26	2.97517	4.46515	2.68357	83	Exon (ENSMUST00000187481.1/ENSMUST00000187481.1, exon 1 of 1)	1	24263994	24587472	323479	2	12823	ENSMUST00000115244.8	-7344	ENSMUSG00000026141	Col19a1	collagen, type XIX, alpha 1	-495	Tubb4b-ps2	ENSMUST00000187481.1	exonic	proximal <=1000bp	0.239895	-0.643972	0.766491	0.389148	0.624001
chr1	24595031	24595118	88	*	PND_Adult_NF_peak_3234	44	3.59841	6.36153	4.4833	51	Exon (ENSMUST00000187481.1/ENSMUST00000187481.1, exon 1 of 1)	1	24263994	24587472	323479	2	12823	ENSMUST00000115244.8	-7559	ENSMUSG00000026141	Col19a1	collagen, type XIX, alpha 1	-305	Tubb4b-ps2	ENSMUST00000187481.1	exonic	proximal <=1000bp	0.257303	-0.595454	0.694967	0.411909	0.643154
chr1	24595201	24595688	488	*	PND_Adult_NF_peak_3235	234	8.28797	25.6913	23.4351	235	Exon (ENSMUST00000187481.1/ENSMUST00000187481.1, exon 1 of 1)	1	24263994	24587472	323479	2	12823	ENSMUST00000115244.8	-7729	ENSMUSG00000026141	Col19a1	collagen, type XIX, alpha 1	0	Tubb4b-ps2	ENSMUST00000187481.1	exonic	TSS	-0.284799	1.11509	3.15446	0.0871701	0.269815
chr1	24595772	24595853	82	*	PND_Adult_NF_peak_3236	45	3.64456	6.45687	4.57613	34	Distal Intergenic	1	24263994	24587472	323479	2	12823	ENSMUST00000115244.8	-8300	ENSMUSG00000026141	Col19a1	collagen, type XIX, alpha 1	349	Tubb4b-ps2	ENSMUST00000187481.1	intergenic	proximal <=1000bp	-0.452876	-0.884757	1.93527	0.175719	0.402329
chr1	24601576	24601808	233	*	PND_Adult_NF_peak_3237	96	5.46067	11.7173	9.68254	167	Distal Intergenic	1	24263994	24587472	323479	2	12823	ENSMUST00000115244.8	-14104	ENSMUSG00000026141	Col19a1	collagen, type XIX, alpha 1	6153	Tubb4b-ps2	ENSMUST00000187481.1	intergenic	intergenic	-0.204664	-0.287611	0.743758	0.396174	0.630042
chr1	24602900	24603086	187	*	PND_Adult_NF_peak_3238	1327	29.5296	135.602	132.75	81	Distal Intergenic	1	24263994	24587472	323479	2	12823	ENSMUST00000115244.8	-15428	ENSMUSG00000026141	Col19a1	collagen, type XIX, alpha 1	7477	Tubb4b-ps2	ENSMUST00000187481.1	intergenic	intergenic	0.345014	0.387057	2.6559	0.114962	0.31634
chr1	24633648	24633759	112	*	PND_Adult_NF_peak_3242	283	10.5405	30.6286	28.3187	63	Distal Intergenic	1	24678630	24765448	86819	1	68421	ENSMUST00000191471.6	-44871	ENSMUSG00000073725	Lmbrd1	LMBR1 domain containing 1	17451	RP23-8J15.1	ENSMUST00000187117.1	intergenic	intergenic	-0.19976	0.871172	1.23436	0.27651	0.518568
chr1	24633849	24634051	203	*	PND_Adult_NF_peak_3243	727	19.7296	75.3169	72.7107	101	Distal Intergenic	1	24678630	24765448	86819	1	68421	ENSMUST00000191471.6	-44579	ENSMUSG00000073725	Lmbrd1	LMBR1 domain containing 1	17652	RP23-8J15.1	ENSMUST00000187117.1	intergenic	intergenic	-0.0727314	1.2983	0.200856	0.657663	0.819929
chr1	24648039	24648497	459	*	PND_Adult_NF_peak_3245	834	18.8207	86.0964	83.4394	90	Distal Intergenic	1	24678630	24765448	86819	1	68421	ENSMUST00000191471.6	-30133	ENSMUSG00000073725	Lmbrd1	LMBR1 domain containing 1	-30133	Lmbrd1	ENSMUST00000191471.6	intergenic	intergenic	-0.129835	1.63741	1.04625	0.315592	0.557285
chr1	24676225	24676326	102	*	PND_Adult_NF_peak_3247	120	3.81509	14.1553	12.0674	41	Distal Intergenic	1	24678630	24765448	86819	1	68421	ENSMUST00000191471.6	-2304	ENSMUSG00000073725	Lmbrd1	LMBR1 domain containing 1	-2304	Lmbrd1	ENSMUST00000191471.6	intergenic	intergenic	0.463112	-0.454745	3.32068	0.0796835	0.256045
chr1	24677752	24677890	139	*	PND_Adult_NF_peak_3248	84	3.29076	10.5024	8.49482	97	Promoter	1	24678630	24765448	86819	1	68421	ENSMUST00000191471.6	-740	ENSMUSG00000073725	Lmbrd1	LMBR1 domain containing 1	-740	Lmbrd1	ENSMUST00000191471.6	intergenic	proximal <=1000bp	0.431555	0.199239	4.56329	0.0420317	0.176225
chr1	24678448	24678967	520	*	PND_Adult_NF_peak_3249	1840	17.8942	187.032	184.009	143	Promoter	1	24678630	24765448	86819	1	68421	ENSMUST00000191471.6	0	ENSMUSG00000073725	Lmbrd1	LMBR1 domain containing 1	0	Lmbrd1	ENSMUST00000191471.6	exonic	TSS	0.453573	3.27991	13.6511	0.00100879	0.0189532
chr1	24679198	24679286	89	*	PND_Adult_NF_peak_3250	76	2.92132	9.67362	7.68797	49	Promoter	1	24678926	24766301	87376	1	68421	ENSMUST00000095062.9	272	ENSMUSG00000073725	Lmbrd1	LMBR1 domain containing 1	272	Lmbrd1	ENSMUST00000095062.9	intronic	proximal <=1000bp	0.690268	0.438417	4.76256	0.0440152	0.180957
chr1	24699416	24699663	248	*	PND_Adult_NF_peak_3252	7395	57.0551	744.175	739.568	125	Intron (ENSMUST00000191471.6/68421, intron 3 of 15)	1	24678926	24766301	87376	1	68421	ENSMUST00000095062.9	20490	ENSMUSG00000073725	Lmbrd1	LMBR1 domain containing 1	20490	Lmbrd1	ENSMUST00000095062.9	intronic	intronic	-0.119829	2.94502	1.29423	0.265421	0.50672
chr1	24741058	24741178	121	*	PND_Adult_NF_peak_3254	249	9.72966	27.1811	24.9065	84	Intron (ENSMUST00000191471.6/68421, intron 9 of 15)	1	24744873	24762393	17521	1	68421	ENSMUST00000190195.1	-3695	ENSMUSG00000073725	Lmbrd1	LMBR1 domain containing 1	-3695	Lmbrd1	ENSMUST00000190195.1	intronic	intronic	0.162508	-1.343	0.154652	0.697265	0.844025
chr1	24766728	24766888	161	*	PND_Adult_NF_peak_3256	34	3.51349	5.2676	3.43108	141	Distal Intergenic	1	24744873	24762393	17521	1	68421	ENSMUST00000190195.1	21855	ENSMUSG00000073725	Lmbrd1	LMBR1 domain containing 1	21855	Lmbrd1	ENSMUST00000190195.1	intergenic	intergenic	0.988138	-0.928098	8.03386	0.00865923	0.068952
chr1	24767173	24767340	168	*	PND_Adult_NF_peak_3257	342	11.8918	36.5902	34.2265	64	Distal Intergenic	1	24744873	24762393	17521	1	68421	ENSMUST00000190195.1	22300	ENSMUSG00000073725	Lmbrd1	LMBR1 domain containing 1	22300	Lmbrd1	ENSMUST00000190195.1	intergenic	intergenic	0.759446	-0.624702	4.83462	0.0371453	0.164011
chr1	24774620	24774789	170	*	PND_Adult_NF_peak_3258	546	16.2161	57.1911	54.6825	76	Distal Intergenic	1	24744873	24762393	17521	1	68421	ENSMUST00000190195.1	29747	ENSMUSG00000073725	Lmbrd1	LMBR1 domain containing 1	29747	Lmbrd1	ENSMUST00000190195.1	intergenic	intergenic	-0.180371	-0.3753	0.358564	0.554374	0.752022
chr1	24783073	24783269	197	*	PND_Adult_NF_peak_3259	68	4.13042	8.84547	6.88336	157	Distal Intergenic	1	24744873	24762393	17521	1	68421	ENSMUST00000190195.1	38200	ENSMUSG00000073725	Lmbrd1	LMBR1 domain containing 1	38200	Lmbrd1	ENSMUST00000190195.1	intergenic	intergenic	0.258687	-0.474389	0.966283	0.334472	0.575156
chr1	24784936	24785337	402	*	PND_Adult_NF_peak_3260	1247	23.0182	127.562	124.738	192	Distal Intergenic	1	24744873	24762393	17521	1	68421	ENSMUST00000190195.1	40063	ENSMUSG00000073725	Lmbrd1	LMBR1 domain containing 1	40063	Lmbrd1	ENSMUST00000190195.1	intergenic	intergenic	1.09677	0.591054	26.3128	2.31936e-05	0.00192008
chr1	24793067	24793149	83	*	PND_Adult_NF_peak_3261	48	4.05403	6.73932	4.84135	40	Distal Intergenic	1	24744873	24762393	17521	1	68421	ENSMUST00000190195.1	48194	ENSMUSG00000073725	Lmbrd1	LMBR1 domain containing 1	48194	Lmbrd1	ENSMUST00000190195.1	intergenic	intergenic	-0.341271	-1.38239	0.763493	0.390064	0.624757
chr1	24793409	24793766	358	*	PND_Adult_NF_peak_3262	366	12.4323	39.0446	36.6607	274	Distal Intergenic	1	24744873	24762393	17521	1	68421	ENSMUST00000190195.1	48536	ENSMUSG00000073725	Lmbrd1	LMBR1 domain containing 1	48536	Lmbrd1	ENSMUST00000190195.1	intergenic	intergenic	0.16412	0.725773	0.757644	0.39186	0.626379
chr1	24869756	24870110	355	*	PND_Adult_NF_peak_3266	226	9.18913	24.9415	22.6922	280	Distal Intergenic	1	24744873	24762393	17521	1	68421	ENSMUST00000190195.1	124883	ENSMUSG00000073725	Lmbrd1	LMBR1 domain containing 1	-41549	RP23-109H7.1	ENSMUST00000187022.1	intergenic	intergenic	0.0299729	-0.0990705	0.0181077	0.89397	0.950976
chr1	24926398	24926669	272	*	PND_Adult_NF_peak_3267	283	10.5405	30.6286	28.3187	51	Distal Intergenic	1	24744873	24762393	17521	1	68421	ENSMUST00000190195.1	181525	ENSMUSG00000073725	Lmbrd1	LMBR1 domain containing 1	14739	RP23-109H7.1	ENSMUST00000187022.1	intergenic	intergenic	-0.0687356	0.254032	0.110126	0.742604	0.8707
chr1	24939052	24939342	291	*	PND_Adult_NF_peak_3268	1404	31.6214	143.291	140.413	209	Distal Intergenic	1	24744873	24762393	17521	1	68421	ENSMUST00000190195.1	194179	ENSMUSG00000073725	Lmbrd1	LMBR1 domain containing 1	-25634	RP24-178K6.1	ENSMUST00000186563.1	intergenic	intergenic	0.25546	0.775318	2.01126	0.167754	0.392072
chr1	25011043	25011265	223	*	PND_Adult_NF_peak_3271	642	18.108	66.8153	64.2526	63	Distal Intergenic	1	25131252	25204723	73472	2	210933	ENSMUST00000154102.1	193458	ENSMUSG00000033569	Adgrb3	adhesion G protein-coupled receptor B3	-676	RP24-178K6.2	ENSMUST00000188406.1	intergenic	proximal <=1000bp	-0.232687	-0.475301	0.722801	0.40282	0.635753
chr1	25033119	25033404	286	*	PND_Adult_NF_peak_3272	3242	43.8318	327.646	324.213	154	Distal Intergenic	1	25131252	25204723	73472	2	210933	ENSMUST00000154102.1	171319	ENSMUSG00000033569	Adgrb3	adhesion G protein-coupled receptor B3	5887	RP24-178K6.3	ENSMUST00000185379.1	intergenic	intergenic	-0.680396	1.45722	19.9422	0.000131887	0.00548877
chr1	25053378	25053678	301	*	PND_Adult_NF_peak_3273	953	22.3786	98.0834	95.3743	238	Distal Intergenic	1	25131252	25204723	73472	2	210933	ENSMUST00000154102.1	151045	ENSMUSG00000033569	Adgrb3	adhesion G protein-coupled receptor B3	26146	RP24-178K6.3	ENSMUST00000185379.1	intergenic	intergenic	-0.671257	0.695507	13.741	0.000973564	0.0185805
chr1	25054043	25054164	122	*	PND_Adult_NF_peak_3274	70	4.64278	9.04027	7.07404	49	Distal Intergenic	1	25131252	25204723	73472	2	210933	ENSMUST00000154102.1	150559	ENSMUSG00000033569	Adgrb3	adhesion G protein-coupled receptor B3	26811	RP24-178K6.3	ENSMUST00000185379.1	intergenic	intergenic	0.0798536	-0.886007	0.065082	0.8006	0.903138
chr1	25064097	25064288	192	*	PND_Adult_NF_peak_3276	464	14.11	48.9243	46.469	109	Distal Intergenic	1	25131252	25204723	73472	2	210933	ENSMUST00000154102.1	140435	ENSMUSG00000033569	Adgrb3	adhesion G protein-coupled receptor B3	36865	RP24-178K6.3	ENSMUST00000185379.1	intergenic	intergenic	0.405392	-0.0365136	2.82985	0.10424	0.298867
chr1	25064375	25064533	159	*	PND_Adult_NF_peak_3277	118	6.15121	13.896	11.8119	82	Downstream (2-3kb)	1	25131252	25204723	73472	2	210933	ENSMUST00000154102.1	140190	ENSMUSG00000033569	Adgrb3	adhesion G protein-coupled receptor B3	37143	RP24-178K6.3	ENSMUST00000185379.1	intergenic	intergenic	0.706478	-0.366877	7.2102	0.012328	0.0848285
chr1	25066496	25066772	277	*	PND_Adult_NF_peak_3278	98	5.56922	11.9358	9.89194	231	Downstream (<1kb)	1	25131252	25204723	73472	2	210933	ENSMUST00000154102.1	137951	ENSMUSG00000033569	Adgrb3	adhesion G protein-coupled receptor B3	39264	RP24-178K6.3	ENSMUST00000185379.1	intergenic	intergenic	0.331299	-0.129472	1.60369	0.216367	0.452451
chr1	25066914	25067014	101	*	PND_Adult_NF_peak_3279	116	6.07551	13.743	11.6611	40	Downstream (<1kb)	1	25131252	25204723	73472	2	210933	ENSMUST00000154102.1	137709	ENSMUSG00000033569	Adgrb3	adhesion G protein-coupled receptor B3	39682	RP24-178K6.3	ENSMUST00000185379.1	intergenic	intergenic	-0.514848	-0.885142	1.96743	0.172294	0.397834
chr1	25177751	25177867	117	*	PND_Adult_NF_peak_3281	148	6.58682	16.9493	14.8111	44	Intron (ENSMUST00000126626.7/210933, intron 4 of 15)	1	25131252	25204723	73472	2	210933	ENSMUST00000154102.1	26856	ENSMUSG00000033569	Adgrb3	adhesion G protein-coupled receptor B3	-26856	Adgrb3	ENSMUST00000154102.1	intronic	intronic	0.571689	-0.78883	3.23037	0.0836557	0.26346
chr1	25178426	25178600	175	*	PND_Adult_NF_peak_3282	112	5.69279	13.3434	11.2722	127	Intron (ENSMUST00000126626.7/210933, intron 4 of 15)	1	25131252	25204723	73472	2	210933	ENSMUST00000154102.1	26123	ENSMUSG00000033569	Adgrb3	adhesion G protein-coupled receptor B3	-26123	Adgrb3	ENSMUST00000154102.1	intronic	intronic	-0.287331	-0.213857	1.30624	0.263267	0.504321
chr1	25178760	25178982	223	*	PND_Adult_NF_peak_3283	49	3.84816	6.87164	4.97048	113	Intron (ENSMUST00000126626.7/210933, intron 4 of 15)	1	25131252	25204723	73472	2	210933	ENSMUST00000154102.1	25741	ENSMUSG00000033569	Adgrb3	adhesion G protein-coupled receptor B3	-25741	Adgrb3	ENSMUST00000154102.1	intronic	intronic	0.0416353	-0.373782	0.0128313	0.910873	0.959253
chr1	25180280	25180507	228	*	PND_Adult_NF_peak_3284	181	7.28498	20.3482	18.1597	160	Intron (ENSMUST00000126626.7/210933, intron 4 of 15)	1	25131252	25204723	73472	2	210933	ENSMUST00000154102.1	24216	ENSMUSG00000033569	Adgrb3	adhesion G protein-coupled receptor B3	-24216	Adgrb3	ENSMUST00000154102.1	intronic	intronic	-0.0389504	-0.139967	0.0272556	0.87012	0.939091
chr1	25189442	25189555	114	*	PND_Adult_NF_peak_3285	88	5.40537	10.872	8.85172	39	Intron (ENSMUST00000126626.7/210933, intron 4 of 15)	1	25131252	25204723	73472	2	210933	ENSMUST00000154102.1	15168	ENSMUSG00000033569	Adgrb3	adhesion G protein-coupled receptor B3	-15168	Adgrb3	ENSMUST00000154102.1	intronic	intronic	-0.0348461	-1.08125	0.0100139	0.92104	0.96417
chr1	25192153	25192288	136	*	PND_Adult_NF_peak_3286	533	15.9458	55.8439	53.3435	65	Intron (ENSMUST00000126626.7/210933, intron 4 of 15)	1	25131252	25204723	73472	2	210933	ENSMUST00000154102.1	12435	ENSMUSG00000033569	Adgrb3	adhesion G protein-coupled receptor B3	-12435	Adgrb3	ENSMUST00000154102.1	intronic	intronic	-0.325618	0.160297	2.27024	0.143673	0.359185
chr1	25203151	25203482	332	*	PND_Adult_NF_peak_3287	2561	39.8762	259.385	256.146	123	Exon (ENSMUST00000190202.1/ENSMUST00000190202.1, exon 1 of 1)	1	25131252	25204723	73472	2	210933	ENSMUST00000154102.1	1241	ENSMUSG00000033569	Adgrb3	adhesion G protein-coupled receptor B3	-1241	Adgrb3	ENSMUST00000154102.1	exonic	exonic	-0.00577225	1.49999	0.00149088	0.969488	0.986635
chr1	25223762	25224013	252	*	PND_Adult_NF_peak_3289	198	7.39766	22.0589	19.8461	182	Exon (ENSMUST00000119680.1/ENSMUST00000119680.1, exon 1 of 1)	1	25067476	25228826	161351	2	210933	ENSMUST00000126626.7	4813	ENSMUSG00000033569	Adgrb3	adhesion G protein-coupled receptor B3	32	AC122187.1	ENSMUST00000119680.1	exonic	proximal <=1000bp	-0.154469	-0.167317	0.394081	0.535519	0.738186
chr1	25228457	25228563	107	*	PND_Adult_NF_peak_3290	231	7.763	25.442	23.1882	55	Promoter	1	25067476	25228826	161351	2	210933	ENSMUST00000126626.7	263	ENSMUSG00000033569	Adgrb3	adhesion G protein-coupled receptor B3	-263	Adgrb3	ENSMUST00000126626.7	exonic	proximal <=1000bp	-0.0289592	0.653246	0.0209612	0.885977	0.947151
chr1	25228685	25228913	229	*	PND_Adult_NF_peak_3291	1305	24.1115	133.375	130.531	95	Promoter	1	25067476	25228826	161351	2	210933	ENSMUST00000126626.7	0	ENSMUSG00000033569	Adgrb3	adhesion G protein-coupled receptor B3	0	Adgrb3	ENSMUST00000126626.7	exonic	TSS	0.116466	1.65752	0.628429	0.434951	0.662017
chr1	25229042	25229143	102	*	PND_Adult_NF_peak_3292	33	3.25757	5.22018	3.39825	87	Promoter	1	25091454	25229046	137593	2	210933	ENSMUST00000126096.7	0	ENSMUSG00000033569	Adgrb3	adhesion G protein-coupled receptor B3	0	Adgrb3	ENSMUST00000126096.7	exonic	TSS	-0.137042	-0.0709736	0.397879	0.533573	0.736724
chr1	25270301	25270603	303	*	PND_Adult_NF_peak_3294	2907	45.3124	294.095	290.758	116	Intron (ENSMUST00000146592.7/210933, intron 15 of 28)	1	25276404	25277954	1551	2	100504323	ENSMUST00000193138.1	7351	ENSMUSG00000104257	Gm20172	predicted gene, 20172	-7351	RP23-21P2.4	ENSMUST00000193138.1	intronic	intronic	0.132158	1.38368	0.522872	0.47618	0.694215
chr1	25283207	25283498	292	*	PND_Adult_NF_peak_3295	6191	52.4993	623.382	619.128	156	Intron (ENSMUST00000146592.7/210933, intron 15 of 28)	1	25276404	25277954	1551	2	100504323	ENSMUST00000193138.1	-5253	ENSMUSG00000104257	Gm20172	predicted gene, 20172	-1750	RP23-21P2.3	ENSMUST00000192443.1	intronic	intronic	0.170838	2.55704	2.35375	0.1368	0.3493
chr1	25317103	25317403	301	*	PND_Adult_NF_peak_3296	493	15.135	51.8468	49.3713	114	Exon (ENSMUST00000193392.1/ENSMUST00000193392.1, exon 1 of 1)	1	25276404	25277954	1551	2	100504323	ENSMUST00000193138.1	-39149	ENSMUSG00000104257	Gm20172	predicted gene, 20172	-305	RP23-21P2.5	ENSMUST00000193392.1	exonic	proximal <=1000bp	0.246316	0.157897	1.52319	0.227938	0.465665
chr1	25430265	25430765	501	*	PND_Adult_NF_peak_3300	194	8.37832	21.6771	19.4682	417	Intron (ENSMUST00000146592.7/210933, intron 13 of 28)	1	25276404	25277954	1551	2	100504323	ENSMUST00000193138.1	-152311	ENSMUSG00000104257	Gm20172	predicted gene, 20172	-20306	Gm25294	ENSMUST00000122791.1	intronic	intronic	-0.320762	0.609381	2.41638	0.131899	0.342112
chr1	25439381	25439632	252	*	PND_Adult_NF_peak_3301	354	12.1621	37.8126	35.4387	188	Intron (ENSMUST00000146592.7/210933, intron 11 of 28)	1	25276404	25277954	1551	2	100504323	ENSMUST00000193138.1	-161427	ENSMUSG00000104257	Gm20172	predicted gene, 20172	-11439	Gm25294	ENSMUST00000122791.1	intronic	intronic	0.0513866	-0.285101	0.037537	0.847849	0.927988
chr1	25474511	25474815	305	*	PND_Adult_NF_peak_3302	80	5.1351	9.99922	8.00071	249	Intron (ENSMUST00000146592.7/210933, intron 9 of 28)	1	25276404	25277954	1551	2	100504323	ENSMUST00000193138.1	-196557	ENSMUSG00000104257	Gm20172	predicted gene, 20172	23440	Gm25294	ENSMUST00000122791.1	intronic	intronic	0.803764	-0.988663	6.34602	0.0180964	0.106901
chr1	25508617	25508864	248	*	PND_Adult_NF_peak_3303	63	4.27196	8.28823	6.34554	90	Intron (ENSMUST00000146592.7/210933, intron 6 of 28)	1	25276404	25277954	1551	2	100504323	ENSMUST00000193138.1	-230663	ENSMUSG00000104257	Gm20172	predicted gene, 20172	57546	Gm25294	ENSMUST00000122791.1	intronic	intronic	-0.193813	-0.30509	0.588887	0.449613	0.674012
chr1	25509192	25509473	282	*	PND_Adult_NF_peak_3304	250	8.75082	27.3114	25.0358	102	Intron (ENSMUST00000146592.7/210933, intron 6 of 28)	1	25276404	25277954	1551	2	100504323	ENSMUST00000193138.1	-231238	ENSMUSG00000104257	Gm20172	predicted gene, 20172	58121	Gm25294	ENSMUST00000122791.1	intronic	intronic	0.0354983	0.218789	0.0256124	0.874061	0.941019
chr1	25510420	25510583	164	*	PND_Adult_NF_peak_3305	482	13.3224	50.7446	48.2765	76	Intron (ENSMUST00000146592.7/210933, intron 6 of 28)	1	25276404	25277954	1551	2	100504323	ENSMUST00000193138.1	-232466	ENSMUSG00000104257	Gm20172	predicted gene, 20172	59349	Gm25294	ENSMUST00000122791.1	intronic	intronic	0.0503197	0.517754	0.0703741	0.792839	0.898787
chr1	25510754	25510863	110	*	PND_Adult_NF_peak_3306	135	6.20167	15.6692	13.5516	42	Intron (ENSMUST00000146592.7/210933, intron 6 of 28)	1	25276404	25277954	1551	2	100504323	ENSMUST00000193138.1	-232800	ENSMUSG00000104257	Gm20172	predicted gene, 20172	59683	Gm25294	ENSMUST00000122791.1	intronic	intronic	0.270949	-0.146277	1.74152	0.1982	0.430698
chr1	25536980	25537196	217	*	PND_Adult_NF_peak_3308	163	7.56752	18.5361	16.3714	103	Intron (ENSMUST00000146592.7/210933, intron 4 of 28)	1	25276404	25277954	1551	2	100504323	ENSMUST00000193138.1	-259026	ENSMUSG00000104257	Gm20172	predicted gene, 20172	-73988	RP23-347F2.2	ENSMUST00000195543.1	intronic	intronic	-0.00384762	-0.929501	0.000140697	0.990625	0.996165
chr1	25588893	25589176	284	*	PND_Adult_NF_peak_3310	2342	38.6047	237.463	234.288	154	Intron (ENSMUST00000146592.7/210933, intron 1 of 28)	1	25067550	25826139	758590	2	210933	ENSMUST00000146592.7	236963	ENSMUSG00000033569	Adgrb3	adhesion G protein-coupled receptor B3	-22008	RP23-347F2.2	ENSMUST00000195543.1	intronic	intronic	0.236458	0.997719	1.77494	0.194083	0.425593
chr1	25599987	25600072	86	*	PND_Adult_NF_peak_3311	34	3.51349	5.2676	3.43108	26	Intron (ENSMUST00000146592.7/210933, intron 1 of 28)	1	25067550	25826139	758590	2	210933	ENSMUST00000146592.7	226067	ENSMUSG00000033569	Adgrb3	adhesion G protein-coupled receptor B3	-11112	RP23-347F2.2	ENSMUST00000195543.1	intronic	intronic	0.0425291	-1.30209	0.00898487	0.925194	0.9661
chr1	25602918	25603167	250	*	PND_Adult_NF_peak_3312	163	7.56752	18.5361	16.3714	113	Intron (ENSMUST00000146592.7/210933, intron 1 of 28)	1	25067550	25826139	758590	2	210933	ENSMUST00000146592.7	222972	ENSMUSG00000033569	Adgrb3	adhesion G protein-coupled receptor B3	-8017	RP23-347F2.2	ENSMUST00000195543.1	intronic	intronic	0.0219502	-0.169654	0.00936398	0.923637	0.965374
chr1	25614891	25614980	90	*	PND_Adult_NF_peak_3313	124	6.48644	14.5631	12.4648	44	Exon (ENSMUST00000190216.1/ENSMUST00000190216.1, exon 1 of 1)	1	25067550	25826139	758590	2	210933	ENSMUST00000146592.7	211159	ENSMUSG00000033569	Adgrb3	adhesion G protein-coupled receptor B3	-535	RP23-347F2.3	ENSMUST00000190216.1	exonic	proximal <=1000bp	0.00188963	-0.850343	2.87993e-05	0.995758	0.998179
chr1	25615140	25615491	352	*	PND_Adult_NF_peak_3314	194	8.37832	21.6771	19.4682	80	Exon (ENSMUST00000190216.1/ENSMUST00000190216.1, exon 1 of 1)	1	25067550	25826139	758590	2	210933	ENSMUST00000146592.7	210648	ENSMUSG00000033569	Adgrb3	adhesion G protein-coupled receptor B3	-24	RP23-347F2.3	ENSMUST00000190216.1	exonic	proximal <=1000bp	0.19687	0.470471	1.06502	0.311372	0.553111
chr1	25635881	25636270	390	*	PND_Adult_NF_peak_3315	216	8.91886	23.8403	21.6041	117	Intron (ENSMUST00000146592.7/210933, intron 1 of 28)	1	25067550	25826139	758590	2	210933	ENSMUST00000146592.7	189869	ENSMUSG00000033569	Adgrb3	adhesion G protein-coupled receptor B3	12701	RP23-347F2.1	ENSMUST00000194535.1	intronic	intronic	0.70971	0.411235	11.5915	0.00211569	0.0297758
chr1	25829907	25830782	876	*	PND_Adult_NF_peak_3319	2211	22.9452	224.332	221.196	761	Promoter	1	25067550	25829707	762158	2	210933	ENSMUST00000151309.7	-200	ENSMUSG00000033569	Adgrb3	adhesion G protein-coupled receptor B3	0	RP23-184I13.1	ENSMUST00000194343.1	exonic	TSS	0.23769	3.43954	5.54864	0.0261376	0.13251
chr1	25983209	25983542	334	*	PND_Adult_NF_peak_3324	1226	28.6485	125.496	122.68	130	Distal Intergenic	1	25067550	25829707	762158	2	210933	ENSMUST00000151309.7	-153502	ENSMUSG00000033569	Adgrb3	adhesion G protein-coupled receptor B3	-13617	RP24-228I17.1	ENSMUST00000185358.1	intergenic	intergenic	-0.143818	0.252788	0.490018	0.490001	0.704481
chr1	25997221	25997518	298	*	PND_Adult_NF_peak_3326	709	18.1444	73.5349	70.9379	121	Distal Intergenic	1	25067550	25829707	762158	2	210933	ENSMUST00000151309.7	-167514	ENSMUSG00000033569	Adgrb3	adhesion G protein-coupled receptor B3	62	RP24-228I17.1	ENSMUST00000185358.1	intergenic	proximal <=1000bp	0.272272	0.745115	2.41588	0.131938	0.34215
chr1	26063287	26063603	317	*	PND_Adult_NF_peak_3328	216	8.91886	23.8403	21.6041	150	Distal Intergenic	1	25067550	25829707	762158	2	210933	ENSMUST00000151309.7	-233580	ENSMUSG00000033569	Adgrb3	adhesion G protein-coupled receptor B3	66128	RP24-228I17.1	ENSMUST00000185358.1	intergenic	intergenic	-0.683037	-0.828031	4.95132	0.0347567	0.157885
chr1	26063957	26064320	364	*	PND_Adult_NF_peak_3329	226	9.18913	24.9415	22.6922	68	Distal Intergenic	1	25067550	25829707	762158	2	210933	ENSMUST00000151309.7	-234250	ENSMUSG00000033569	Adgrb3	adhesion G protein-coupled receptor B3	66798	RP24-228I17.1	ENSMUST00000185358.1	intergenic	intergenic	-0.257351	-0.209061	0.861028	0.361801	0.600326
chr1	26201631	26201811	181	*	PND_Adult_NF_peak_3332	63	4.59456	8.32052	6.36926	41	Distal Intergenic	1	25067550	25829707	762158	2	210933	ENSMUST00000151309.7	-371924	ENSMUSG00000033569	Adgrb3	adhesion G protein-coupled receptor B3	204472	RP24-228I17.1	ENSMUST00000185358.1	intergenic	intergenic	0.139206	-1.18748	0.157274	0.694845	0.842692
chr1	26202854	26203408	555	*	PND_Adult_NF_peak_3334	97	5.66461	11.7444	9.70921	502	Distal Intergenic	1	25067550	25829707	762158	2	210933	ENSMUST00000151309.7	-373147	ENSMUSG00000033569	Adgrb3	adhesion G protein-coupled receptor B3	205695	RP24-228I17.1	ENSMUST00000185358.1	intergenic	intergenic	0.849804	0.365869	11.059	0.00286234	0.0355757
chr1	26229732	26229949	218	*	PND_Adult_NF_peak_3335	63	4.59456	8.32052	6.36926	49	Distal Intergenic	1	25067550	25829707	762158	2	210933	ENSMUST00000151309.7	-400025	ENSMUSG00000033569	Adgrb3	adhesion G protein-coupled receptor B3	232573	RP24-228I17.1	ENSMUST00000185358.1	intergenic	intergenic	0.419929	-0.875161	1.79166	0.192061	0.423165
chr1	26278387	26278737	351	*	PND_Adult_NF_peak_3338	684	18.9188	71.0384	68.4536	219	Distal Intergenic	1	26681814	26687460	5647	2	210940	ENSMUST00000097801.3	408723	ENSMUSG00000073722	4931408C20Rik	RIKEN cDNA 4931408C20 gene	-187499	RP24-264B17.1	ENSMUST00000190716.1	intergenic	intergenic	-0.204716	0.343009	0.98691	0.329457	0.570443
chr1	26312847	26313149	303	*	PND_Adult_NF_peak_3339	48	4.05403	6.73932	4.84135	103	Distal Intergenic	1	26681814	26687460	5647	2	210940	ENSMUST00000097801.3	374311	ENSMUSG00000073722	4931408C20Rik	RIKEN cDNA 4931408C20 gene	-153087	RP24-264B17.1	ENSMUST00000190716.1	intergenic	intergenic	0.113594	-1.33011	0.0790186	0.780808	0.892146
chr1	26327839	26328005	167	*	PND_Adult_NF_peak_3340	271	10.2702	29.4681	27.1697	64	Distal Intergenic	1	26681814	26687460	5647	2	210940	ENSMUST00000097801.3	359455	ENSMUSG00000073722	4931408C20Rik	RIKEN cDNA 4931408C20 gene	-138231	RP24-264B17.1	ENSMUST00000190716.1	intergenic	intergenic	-0.299578	-1.0612	0.658411	0.424328	0.653654
chr1	26333212	26333466	255	*	PND_Adult_NF_peak_3341	163	7.56752	18.5361	16.3714	203	Distal Intergenic	1	26681814	26687460	5647	2	210940	ENSMUST00000097801.3	353994	ENSMUSG00000073722	4931408C20Rik	RIKEN cDNA 4931408C20 gene	-132770	RP24-264B17.1	ENSMUST00000190716.1	intergenic	intergenic	0.384543	-0.092885	2.72379	0.110631	0.309612
chr1	26333627	26333752	126	*	PND_Adult_NF_peak_3342	115	6.21617	13.6121	11.532	76	Distal Intergenic	1	26681814	26687460	5647	2	210940	ENSMUST00000097801.3	353708	ENSMUSG00000073722	4931408C20Rik	RIKEN cDNA 4931408C20 gene	-132484	RP24-264B17.1	ENSMUST00000190716.1	intergenic	intergenic	0.0814827	-0.434317	0.101781	0.752197	0.875779
chr1	26364302	26364401	100	*	PND_Adult_NF_peak_3343	41	3.78376	5.98892	4.12049	36	Distal Intergenic	1	26681814	26687460	5647	2	210940	ENSMUST00000097801.3	323059	ENSMUSG00000073722	4931408C20Rik	RIKEN cDNA 4931408C20 gene	-101835	RP24-264B17.1	ENSMUST00000190716.1	intergenic	intergenic	-0.0817554	-0.748212	0.0559783	0.814783	0.910675
chr1	26364556	26364658	103	*	PND_Adult_NF_peak_3344	55	4.32429	7.51705	5.59157	33	Distal Intergenic	1	26681814	26687460	5647	2	210940	ENSMUST00000097801.3	322802	ENSMUSG00000073722	4931408C20Rik	RIKEN cDNA 4931408C20 gene	-101578	RP24-264B17.1	ENSMUST00000190716.1	intergenic	intergenic	-0.338872	-0.661919	1.24671	0.274174	0.516058
chr1	26509873	26510076	204	*	PND_Adult_NF_peak_3349	41	3.78376	5.98892	4.12049	34	Distal Intergenic	1	26681814	26687460	5647	2	210940	ENSMUST00000097801.3	177384	ENSMUSG00000073722	4931408C20Rik	RIKEN cDNA 4931408C20 gene	43637	RP24-264B17.1	ENSMUST00000190716.1	intergenic	intergenic	0.536791	-1.23692	1.92204	0.177152	0.404172
chr1	26548338	26548575	238	*	PND_Adult_NF_peak_3350	546	16.2161	57.1911	54.6825	91	Distal Intergenic	1	26681814	26687460	5647	2	210940	ENSMUST00000097801.3	138885	ENSMUSG00000073722	4931408C20Rik	RIKEN cDNA 4931408C20 gene	-18258	Gm24064	ENSMUST00000157486.1	intergenic	intergenic	0.132061	-0.366367	0.214036	0.647387	0.813594
chr1	26616615	26616798	184	*	PND_Adult_NF_peak_3353	97	5.67564	11.7657	9.72455	132	Distal Intergenic	1	26681814	26687460	5647	2	210940	ENSMUST00000097801.3	70662	ENSMUSG00000073722	4931408C20Rik	RIKEN cDNA 4931408C20 gene	49782	Gm24064	ENSMUST00000157486.1	intergenic	intergenic	0.775089	-0.476634	7.99784	0.00879192	0.0695477
chr1	26616880	26617246	367	*	PND_Adult_NF_peak_3354	115	6.21617	13.6121	11.532	86	Distal Intergenic	1	26681814	26687460	5647	2	210940	ENSMUST00000097801.3	70214	ENSMUSG00000073722	4931408C20Rik	RIKEN cDNA 4931408C20 gene	50047	Gm24064	ENSMUST00000157486.1	intergenic	intergenic	0.310893	0.195781	0.490301	0.497136	0.709834
chr1	26686923	26687090	168	*	PND_Adult_NF_peak_3358	93	4.66838	11.3539	9.32539	87	Promoter	1	26681814	26687460	5647	2	210940	ENSMUST00000097801.3	370	ENSMUSG00000073722	4931408C20Rik	RIKEN cDNA 4931408C20 gene	-370	RP24-338N17.1	ENSMUST00000097801.3	intronic	proximal <=1000bp	1.85555	-0.647528	31.9677	5.58851e-06	0.000808417
chr1	26687203	26687769	567	*	PND_Adult_NF_peak_3359	185	6.66584	20.711	18.5154	346	Promoter	1	26681814	26687460	5647	2	210940	ENSMUST00000097801.3	0	ENSMUSG00000073722	4931408C20Rik	RIKEN cDNA 4931408C20 gene	0	RP24-338N17.1	ENSMUST00000097801.3	exonic	TSS	1.95229	1.13899	53.8066	1.69404e-06	0.000389748
chr1	26688005	26688305	301	*	PND_Adult_NF_peak_3360	158	6.12124	18.0011	15.8463	202	Promoter	1	26681814	26687460	5647	2	210940	ENSMUST00000097801.3	-545	ENSMUSG00000073722	4931408C20Rik	RIKEN cDNA 4931408C20 gene	545	RP24-338N17.1	ENSMUST00000097801.3	intergenic	proximal <=1000bp	1.83757	-0.350367	34.2239	4.10866e-06	0.00068093
chr1	26774343	26774487	145	*	PND_Adult_NF_peak_3363	143	7.02698	16.5171	14.3843	37	Distal Intergenic	1	26681814	26687460	5647	2	210940	ENSMUST00000097801.3	-86883	ENSMUSG00000073722	4931408C20Rik	RIKEN cDNA 4931408C20 gene	86883	RP24-338N17.1	ENSMUST00000097801.3	intergenic	intergenic	0.0708848	-0.701719	0.0618873	0.80545	0.905751
chr1	26867444	26867658	215	*	PND_Adult_NF_peak_3366	1264	26.7331	129.237	126.408	88	Distal Intergenic	1	26681814	26687460	5647	2	210940	ENSMUST00000097801.3	-179984	ENSMUSG00000073722	4931408C20Rik	RIKEN cDNA 4931408C20 gene	-91563	n-R5s209	ENSMUST00000179494.1	intergenic	intergenic	0.579205	0.256974	8.31098	0.00770848	0.064448
chr1	26881418	26881641	224	*	PND_Adult_NF_peak_3369	249	9.72966	27.1811	24.9065	150	Distal Intergenic	1	26681814	26687460	5647	2	210940	ENSMUST00000097801.3	-193958	ENSMUSG00000073722	4931408C20Rik	RIKEN cDNA 4931408C20 gene	-77580	n-R5s209	ENSMUST00000179494.1	intergenic	intergenic	0.84049	-0.930235	7.07431	0.0130828	0.0879216
chr1	26891082	26891359	278	*	PND_Adult_NF_peak_3370	2876	44.123	290.962	287.633	131	Distal Intergenic	1	26681814	26687460	5647	2	210940	ENSMUST00000097801.3	-203622	ENSMUSG00000073722	4931408C20Rik	RIKEN cDNA 4931408C20 gene	-67862	n-R5s209	ENSMUST00000179494.1	intergenic	intergenic	-0.0346472	1.61835	0.0526011	0.820353	0.913534
chr1	26900477	26900724	248	*	PND_Adult_NF_peak_3372	124	6.48644	14.5631	12.4648	194	Distal Intergenic	1	26681814	26687460	5647	2	210940	ENSMUST00000097801.3	-213017	ENSMUSG00000073722	4931408C20Rik	RIKEN cDNA 4931408C20 gene	-58497	n-R5s209	ENSMUST00000179494.1	intergenic	intergenic	0.446261	-0.454882	2.37524	0.135095	0.346678
chr1	26947810	26948018	209	*	PND_Adult_NF_peak_3374	354	12.1621	37.8126	35.4387	108	Distal Intergenic	1	26681814	26687460	5647	2	210940	ENSMUST00000097801.3	-260350	ENSMUSG00000073722	4931408C20Rik	RIKEN cDNA 4931408C20 gene	-11203	n-R5s209	ENSMUST00000179494.1	intergenic	intergenic	0.280452	-0.663925	0.655641	0.425375	0.654573
chr1	27032670	27032996	327	*	PND_Adult_NF_peak_3378	260	9.99993	28.3188	26.0322	272	Distal Intergenic	1	26681814	26687460	5647	2	210940	ENSMUST00000097801.3	-345210	ENSMUSG00000073722	4931408C20Rik	RIKEN cDNA 4931408C20 gene	73449	n-R5s209	ENSMUST00000179494.1	intergenic	intergenic	-0.30763	-0.133124	1.31466	0.261769	0.502768
chr1	27064862	27065065	204	*	PND_Adult_NF_peak_3379	770	20.5404	79.6486	77.0213	89	Distal Intergenic	1	26681814	26687460	5647	2	210940	ENSMUST00000097801.3	-377402	ENSMUSG00000073722	4931408C20Rik	RIKEN cDNA 4931408C20 gene	105641	n-R5s209	ENSMUST00000179494.1	intergenic	intergenic	-0.130807	-0.402588	0.261646	0.613215	0.791598
chr1	27246628	27246978	351	*	PND_Adult_NF_peak_3383	573	16.7566	59.9067	57.3822	231	Distal Intergenic	1	26681814	26687460	5647	2	210940	ENSMUST00000097801.3	-559168	ENSMUSG00000073722	4931408C20Rik	RIKEN cDNA 4931408C20 gene	-89790	RP23-76B18.1	ENSMUST00000188432.1	intergenic	intergenic	1.63029	0.785898	55.674	9.49564e-08	5.8422e-05
chr1	27249234	27249532	299	*	PND_Adult_NF_peak_3385	69	4.73595	8.90321	6.93989	70	Distal Intergenic	1	26681814	26687460	5647	2	210940	ENSMUST00000097801.3	-561774	ENSMUSG00000073722	4931408C20Rik	RIKEN cDNA 4931408C20 gene	-87236	RP23-76B18.1	ENSMUST00000188432.1	intergenic	intergenic	0.412153	-0.707676	1.43189	0.242083	0.481579
chr1	27256350	27256688	339	*	PND_Adult_NF_peak_3386	890	16.3627	91.716	89.0341	101	Distal Intergenic	1	26681814	26687460	5647	2	210940	ENSMUST00000097801.3	-568890	ENSMUSG00000073722	4931408C20Rik	RIKEN cDNA 4931408C20 gene	-80080	RP23-76B18.1	ENSMUST00000188432.1	intergenic	intergenic	0.894471	1.10426	12.5409	0.00250522	0.032948
chr1	27261056	27261311	256	*	PND_Adult_NF_peak_3387	1335	22.1972	136.382	133.527	106	Distal Intergenic	1	26681814	26687460	5647	2	210940	ENSMUST00000097801.3	-573596	ENSMUSG00000073722	4931408C20Rik	RIKEN cDNA 4931408C20 gene	-75457	RP23-76B18.1	ENSMUST00000188432.1	intergenic	intergenic	0.616911	0.878293	11.6759	0.0020502	0.0292424
chr1	27400634	27400927	294	*	PND_Adult_NF_peak_3390	533	15.9458	55.8439	53.3435	110	Distal Intergenic	1	27884046	27902396	18351	1	433281	ENSMUST00000185409.1	-483119	ENSMUSG00000101514	Gm5524	predicted gene 5524	63866	RP23-76B18.1	ENSMUST00000188432.1	intergenic	intergenic	-0.282081	-0.588176	1.05757	0.313038	0.554732
chr1	27443035	27443473	439	*	PND_Adult_NF_peak_3392	1291	27.0361	131.944	129.105	153	Distal Intergenic	1	27884046	27902396	18351	1	433281	ENSMUST00000185409.1	-440573	ENSMUSG00000101514	Gm5524	predicted gene 5524	106267	RP23-76B18.1	ENSMUST00000188432.1	intergenic	intergenic	0.455556	1.06771	9.6026	0.00455277	0.0469634
chr1	27480876	27481127	252	*	PND_Adult_NF_peak_3395	115	6.21617	13.6121	11.532	37	Distal Intergenic	1	27884046	27902396	18351	1	433281	ENSMUST00000185409.1	-402919	ENSMUSG00000101514	Gm5524	predicted gene 5524	144108	RP23-76B18.1	ENSMUST00000188432.1	intergenic	intergenic	0.350766	0.0625239	3.19639	0.0852085	0.266193
chr1	27481212	27481345	134	*	PND_Adult_NF_peak_3396	115	6.21617	13.6121	11.532	69	Distal Intergenic	1	27884046	27902396	18351	1	433281	ENSMUST00000185409.1	-402701	ENSMUSG00000101514	Gm5524	predicted gene 5524	144444	RP23-76B18.1	ENSMUST00000188432.1	intergenic	intergenic	0.0615555	0.0859274	0.096602	0.75837	0.879336
chr1	27503722	27503861	140	*	PND_Adult_NF_peak_3397	41	3.78376	5.98892	4.12049	18	Distal Intergenic	1	27884046	27902396	18351	1	433281	ENSMUST00000185409.1	-380185	ENSMUSG00000101514	Gm5524	predicted gene 5524	166954	RP23-76B18.1	ENSMUST00000188432.1	intergenic	intergenic	0.460032	-1.01442	2.00435	0.16846	0.39293
chr1	27797220	27797401	182	*	PND_Adult_NF_peak_3402	124	6.48644	14.5631	12.4648	69	Distal Intergenic	1	27884046	27902396	18351	1	433281	ENSMUST00000185409.1	-86645	ENSMUSG00000101514	Gm5524	predicted gene 5524	-86645	RP24-176K12.1	ENSMUST00000185409.1	intergenic	intergenic	1.82352	-1.44434	12.9152	0.00146927	0.0240211
chr1	27900617	27900961	345	*	PND_Adult_NF_peak_3404	48	4.05403	6.73932	4.84135	163	Exon (ENSMUST00000185409.1/433281, exon 2 of 2)	1	27884046	27902396	18351	1	433281	ENSMUST00000185409.1	16571	ENSMUSG00000101514	Gm5524	predicted gene 5524	-111	RP24-176K12.2	ENSMUST00000188833.1	exonic	proximal <=1000bp	0.323234	0.208837	1.7629	0.195603	0.427398
chr1	27920493	27920653	161	*	PND_Adult_NF_peak_3406	48	4.05403	6.73932	4.84135	52	Distal Intergenic	1	27884046	27902396	18351	1	433281	ENSMUST00000185409.1	36447	ENSMUSG00000101514	Gm5524	predicted gene 5524	19421	RP24-176K12.2	ENSMUST00000188833.1	intergenic	intergenic	1.5846	-0.857507	25.3213	2.91228e-05	0.00221419
chr1	27920785	27920861	77	*	PND_Adult_NF_peak_3407	63	4.59456	8.32052	6.36926	21	Distal Intergenic	1	27884046	27902396	18351	1	433281	ENSMUST00000185409.1	36739	ENSMUSG00000101514	Gm5524	predicted gene 5524	19713	RP24-176K12.2	ENSMUST00000188833.1	intergenic	intergenic	1.62907	-1.13353	21.4891	8.38522e-05	0.00418676
chr1	27942333	27942658	326	*	PND_Adult_NF_peak_3408	755	20.2701	78.1989	75.5787	176	Distal Intergenic	1	27884046	27902396	18351	1	433281	ENSMUST00000185409.1	58287	ENSMUSG00000101514	Gm5524	predicted gene 5524	41261	RP24-176K12.2	ENSMUST00000188833.1	intergenic	intergenic	0.850447	-0.0948806	14.6889	0.000701941	0.0152248
chr1	27994884	27995114	231	*	PND_Adult_NF_peak_3409	391	12.3533	41.5827	39.1789	56	Distal Intergenic	1	27884046	27902396	18351	1	433281	ENSMUST00000185409.1	110838	ENSMUSG00000101514	Gm5524	predicted gene 5524	4974	RP23-12H12.1	ENSMUST00000189614.1	intergenic	intergenic	0.106069	-0.758999	0.107976	0.745035	0.87199
chr1	27999318	27999576	259	*	PND_Adult_NF_peak_3410	706	18.7639	73.2378	70.6422	57	Distal Intergenic	1	27884046	27902396	18351	1	433281	ENSMUST00000185409.1	115272	ENSMUSG00000101514	Gm5524	predicted gene 5524	9408	RP23-12H12.1	ENSMUST00000189614.1	intergenic	intergenic	0.346477	-0.251442	1.83836	0.186551	0.415838
chr1	28006565	28006822	258	*	PND_Adult_NF_peak_3411	342	11.8918	36.5902	34.2265	69	Distal Intergenic	1	27884046	27902396	18351	1	433281	ENSMUST00000185409.1	122519	ENSMUSG00000101514	Gm5524	predicted gene 5524	16655	RP23-12H12.1	ENSMUST00000189614.1	intergenic	intergenic	-0.0969781	-0.528425	0.103771	0.749871	0.874649
chr1	28007283	28007672	390	*	PND_Adult_NF_peak_3412	115	6.21617	13.6121	11.532	334	Distal Intergenic	1	27884046	27902396	18351	1	433281	ENSMUST00000185409.1	123237	ENSMUSG00000101514	Gm5524	predicted gene 5524	17373	RP23-12H12.1	ENSMUST00000189614.1	intergenic	intergenic	0.606454	-0.12916	7.21059	0.0123259	0.0848285
chr1	28018234	28018537	304	*	PND_Adult_NF_peak_3413	71	4.86483	9.14834	7.17275	255	Distal Intergenic	1	27884046	27902396	18351	1	433281	ENSMUST00000185409.1	134188	ENSMUSG00000101514	Gm5524	predicted gene 5524	28324	RP23-12H12.1	ENSMUST00000189614.1	intergenic	intergenic	0.734075	-0.235049	8.57463	0.00690884	0.06022
chr1	28033714	28033926	213	*	PND_Adult_NF_peak_3414	329	11.2989	35.3455	32.9941	148	Distal Intergenic	1	27884046	27902396	18351	1	433281	ENSMUST00000185409.1	149668	ENSMUSG00000101514	Gm5524	predicted gene 5524	43804	RP23-12H12.1	ENSMUST00000189614.1	intergenic	intergenic	1.18493	-0.638454	15.0873	0.000613326	0.0140071
chr1	28058983	28059186	204	*	PND_Adult_NF_peak_3417	712	19.4593	73.8848	71.2856	75	Distal Intergenic	1	27884046	27902396	18351	1	433281	ENSMUST00000185409.1	174937	ENSMUSG00000101514	Gm5524	predicted gene 5524	69073	RP23-12H12.1	ENSMUST00000189614.1	intergenic	intergenic	0.19816	0.135329	0.817334	0.374082	0.611071
chr1	28109456	28109606	151	*	PND_Adult_NF_peak_3419	34	3.51349	5.2676	3.43108	25	Distal Intergenic	1	27884046	27902396	18351	1	433281	ENSMUST00000185409.1	225410	ENSMUSG00000101514	Gm5524	predicted gene 5524	119546	RP23-12H12.1	ENSMUST00000189614.1	intergenic	intergenic	0.741042	-0.915627	4.22971	0.0496607	0.194082
chr1	28134875	28135038	164	*	PND_Adult_NF_peak_3422	63	4.59456	8.32052	6.36926	49	Distal Intergenic	1	27884046	27902396	18351	1	433281	ENSMUST00000185409.1	250829	ENSMUSG00000101514	Gm5524	predicted gene 5524	144965	RP23-12H12.1	ENSMUST00000189614.1	intergenic	intergenic	-0.0976423	-0.459435	0.157664	0.694487	0.842566
chr1	28328480	28328629	150	*	PND_Adult_NF_peak_3427	143	7.02698	16.5171	14.3843	107	Distal Intergenic	1	27884046	27902396	18351	1	433281	ENSMUST00000185409.1	444434	ENSMUSG00000101514	Gm5524	predicted gene 5524	-241289	RP23-19M20.2	ENSMUST00000193585.1	intergenic	intergenic	0.154465	-0.218464	0.432478	0.516431	0.724021
chr1	28328757	28329000	244	*	PND_Adult_NF_peak_3428	184	8.10805	20.6158	18.4212	106	Distal Intergenic	1	27884046	27902396	18351	1	433281	ENSMUST00000185409.1	444711	ENSMUSG00000101514	Gm5524	predicted gene 5524	-240918	RP23-19M20.2	ENSMUST00000193585.1	intergenic	intergenic	0.317259	0.936714	3.49758	0.0725098	0.242576
chr1	28334878	28335101	224	*	PND_Adult_NF_peak_3429	71	4.86483	9.14834	7.17275	30	Distal Intergenic	1	28776117	28780252	4136	2	210962	ENSMUST00000059937.4	445151	ENSMUSG00000048411	Gm597	predicted gene 597	-234817	RP23-19M20.2	ENSMUST00000193585.1	intergenic	intergenic	0.391526	-0.926287	1.08562	0.30687	0.548763
chr1	28339632	28339767	136	*	PND_Adult_NF_peak_3431	63	4.59456	8.32052	6.36926	45	Distal Intergenic	1	28776117	28780252	4136	2	210962	ENSMUST00000059937.4	440485	ENSMUSG00000048411	Gm597	predicted gene 597	-230151	RP23-19M20.2	ENSMUST00000193585.1	intergenic	intergenic	-0.810405	-1.51106	3.7334	0.0640581	0.225479
chr1	28406120	28406234	115	*	PND_Adult_NF_peak_3435	80	5.1351	9.99922	8.00071	73	Distal Intergenic	1	28776117	28780252	4136	2	210962	ENSMUST00000059937.4	374018	ENSMUSG00000048411	Gm597	predicted gene 597	-163684	RP23-19M20.2	ENSMUST00000193585.1	intergenic	intergenic	0.332331	-0.209729	1.99681	0.169234	0.393883
chr1	28406333	28406636	304	*	PND_Adult_NF_peak_3436	153	7.29725	17.5188	15.3698	257	Distal Intergenic	1	28776117	28780252	4136	2	210962	ENSMUST00000059937.4	373616	ENSMUSG00000048411	Gm597	predicted gene 597	-163282	RP23-19M20.2	ENSMUST00000193585.1	intergenic	intergenic	0.315419	-0.109152	2.00851	0.168034	0.392454
chr1	28431065	28431241	177	*	PND_Adult_NF_peak_3438	124	6.48644	14.5631	12.4648	96	Distal Intergenic	1	28776117	28780252	4136	2	210962	ENSMUST00000059937.4	349011	ENSMUSG00000048411	Gm597	predicted gene 597	-138677	RP23-19M20.2	ENSMUST00000193585.1	intergenic	intergenic	0.381477	-0.901981	1.56223	0.222233	0.459131
chr1	28494036	28494283	248	*	PND_Adult_NF_peak_3442	48	4.05403	6.73932	4.84135	33	Distal Intergenic	1	28776117	28780252	4136	2	210962	ENSMUST00000059937.4	285969	ENSMUSG00000048411	Gm597	predicted gene 597	-75635	RP23-19M20.2	ENSMUST00000193585.1	intergenic	intergenic	0.924429	-0.846875	10.8378	0.00281201	0.0351624
chr1	28502171	28502433	263	*	PND_Adult_NF_peak_3444	173	7.83778	19.5687	17.3886	108	Distal Intergenic	1	28776117	28780252	4136	2	210962	ENSMUST00000059937.4	277819	ENSMUSG00000048411	Gm597	predicted gene 597	-67485	RP23-19M20.2	ENSMUST00000193585.1	intergenic	intergenic	0.120133	-0.280454	0.175903	0.678288	0.832915
chr1	28565172	28565347	176	*	PND_Adult_NF_peak_3449	88	5.40537	10.872	8.85172	117	Distal Intergenic	1	28776117	28780252	4136	2	210962	ENSMUST00000059937.4	214905	ENSMUSG00000048411	Gm597	predicted gene 597	-4571	RP23-19M20.2	ENSMUST00000193585.1	intergenic	intergenic	0.0875164	-0.603898	0.0872819	0.769957	0.885673
chr1	28622561	28623178	618	*	PND_Adult_NF_peak_3453	1069	22.2431	109.72	106.964	368	Distal Intergenic	1	28776117	28780252	4136	2	210962	ENSMUST00000059937.4	157074	ENSMUSG00000048411	Gm597	predicted gene 597	41789	AC122186.1	ENSMUST00000145844.2	intergenic	intergenic	0.000338377	1.7655	5.6305e-06	0.998124	0.999301
chr1	28631103	28631478	376	*	PND_Adult_NF_peak_3454	2003	34.6168	203.437	200.363	225	Distal Intergenic	1	28776117	28780252	4136	2	210962	ENSMUST00000059937.4	148774	ENSMUSG00000048411	Gm597	predicted gene 597	50331	AC122186.1	ENSMUST00000145844.2	intergenic	intergenic	0.141608	1.21331	0.279527	0.604455	0.78579
chr1	28698473	28698882	410	*	PND_Adult_NF_peak_3458	378	12.7026	40.2859	37.8921	110	Distal Intergenic	1	28776117	28780252	4136	2	210962	ENSMUST00000059937.4	81370	ENSMUSG00000048411	Gm597	predicted gene 597	-81370	Gm597	ENSMUST00000059937.4	intergenic	intergenic	0.199048	-0.0942396	0.642375	0.429959	0.658192
chr1	28708609	28708814	206	*	PND_Adult_NF_peak_3460	124	6.48644	14.5631	12.4648	99	Distal Intergenic	1	28776117	28780252	4136	2	210962	ENSMUST00000059937.4	71438	ENSMUSG00000048411	Gm597	predicted gene 597	-71438	Gm597	ENSMUST00000059937.4	intergenic	intergenic	0.301112	-0.191879	1.22619	0.27807	0.520169
chr1	28709266	28709501	236	*	PND_Adult_NF_peak_3461	173	7.83778	19.5687	17.3886	95	Distal Intergenic	1	28776117	28780252	4136	2	210962	ENSMUST00000059937.4	70751	ENSMUSG00000048411	Gm597	predicted gene 597	-70751	Gm597	ENSMUST00000059937.4	intergenic	intergenic	0.354896	-0.259707	2.35141	0.136987	0.349525
chr1	28722182	28722459	278	*	PND_Adult_NF_peak_3463	628	17.8377	65.4203	62.8651	191	Distal Intergenic	1	28776117	28780252	4136	2	210962	ENSMUST00000059937.4	57793	ENSMUSG00000048411	Gm597	predicted gene 597	-57793	Gm597	ENSMUST00000059937.4	intergenic	intergenic	0.116674	-0.446407	0.184446	0.671041	0.828395
chr1	28744226	28744660	435	*	PND_Adult_NF_peak_3464	249	9.72966	27.1811	24.9065	103	Distal Intergenic	1	28776117	28780252	4136	2	210962	ENSMUST00000059937.4	35592	ENSMUSG00000048411	Gm597	predicted gene 597	-35592	Gm597	ENSMUST00000059937.4	intergenic	intergenic	0.0523689	-0.459995	0.0306017	0.862458	0.935214
chr1	28801120	28801378	259	*	PND_Adult_NF_peak_3466	684	16.7223	71.0252	68.4411	94	Exon (ENSMUST00000122295.2/ENSMUST00000122295.2, exon 1 of 1)	1	28776117	28780252	4136	2	210962	ENSMUST00000059937.4	-20868	ENSMUSG00000048411	Gm597	predicted gene 597	-1343	AC121566.1	ENSMUST00000122295.2	exonic	exonic	-0.145363	0.922884	0.945144	0.339723	0.580175
chr1	28801679	28801913	235	*	PND_Adult_NF_peak_3467	163	6.87753	18.4934	16.3326	132	Exon (ENSMUST00000122295.2/ENSMUST00000122295.2, exon 1 of 1)	1	28776117	28780252	4136	2	210962	ENSMUST00000059937.4	-21427	ENSMUSG00000048411	Gm597	predicted gene 597	-808	AC121566.1	ENSMUST00000122295.2	exonic	proximal <=1000bp	-0.374411	0.373611	2.46072	0.128607	0.337353
chr1	28802098	28802315	218	*	PND_Adult_NF_peak_3468	48	3.78726	6.74853	4.85034	147	Exon (ENSMUST00000122295.2/ENSMUST00000122295.2, exon 1 of 1)	1	28776117	28780252	4136	2	210962	ENSMUST00000059937.4	-21846	ENSMUSG00000048411	Gm597	predicted gene 597	-406	AC121566.1	ENSMUST00000122295.2	exonic	proximal <=1000bp	-0.00663282	-0.0199393	0.000417789	0.983892	0.993046
chr1	28802680	28802783	104	*	PND_Adult_NF_peak_3469	23	2.88892	4.11948	2.35037	57	Exon (ENSMUST00000122295.2/ENSMUST00000122295.2, exon 1 of 1)	1	28776117	28780252	4136	2	210962	ENSMUST00000059937.4	-22428	ENSMUSG00000048411	Gm597	predicted gene 597	0	AC121566.1	ENSMUST00000122295.2	exonic	TSS	0.498067	-1.33508	1.09648	0.304835	0.546802
chr1	28833973	28834107	135	*	PND_Adult_NF_peak_3472	71	4.86483	9.14834	7.17275	87	Distal Intergenic	1	28776117	28780252	4136	2	210962	ENSMUST00000059937.4	-53721	ENSMUSG00000048411	Gm597	predicted gene 597	31252	AC121566.1	ENSMUST00000122295.2	intergenic	intergenic	0.196009	-0.677616	0.447993	0.509062	0.718384
chr1	28856604	28856882	279	*	PND_Adult_NF_peak_3473	88	5.40537	10.872	8.85172	50	Distal Intergenic	1	28776117	28780252	4136	2	210962	ENSMUST00000059937.4	-76352	ENSMUSG00000048411	Gm597	predicted gene 597	53883	AC121566.1	ENSMUST00000122295.2	intergenic	intergenic	0.581988	-0.928375	2.6858	0.113031	0.313324
chr1	28859170	28859485	316	*	PND_Adult_NF_peak_3474	150	7.14612	17.2164	15.075	61	Distal Intergenic	1	28776117	28780252	4136	2	210962	ENSMUST00000059937.4	-78918	ENSMUSG00000048411	Gm597	predicted gene 597	56449	AC121566.1	ENSMUST00000122295.2	intergenic	intergenic	-0.0771197	0.208514	0.087538	0.76973	0.885538
chr1	28980055	28980335	281	*	PND_Adult_NF_peak_3479	1210	28.3782	123.902	121.092	192	Distal Intergenic	1	28776117	28780252	4136	2	210962	ENSMUST00000059937.4	-199803	ENSMUSG00000048411	Gm597	predicted gene 597	42019	RP24-365G17.1	ENSMUST00000081488.2	intergenic	intergenic	0.643147	-0.74061	4.86687	0.0362119	0.161669
chr1	29003086	29003214	129	*	PND_Adult_NF_peak_3481	271	10.2702	29.4681	27.1697	68	Distal Intergenic	1	28776117	28780252	4136	2	210962	ENSMUST00000059937.4	-222834	ENSMUSG00000048411	Gm597	predicted gene 597	65050	RP24-365G17.1	ENSMUST00000081488.2	intergenic	intergenic	0.269375	-0.624474	1.02428	0.320629	0.562229
chr1	29053929	29054142	214	*	PND_Adult_NF_peak_3484	560	16.4864	58.5453	56.0288	90	Distal Intergenic	1	28776117	28780252	4136	2	210962	ENSMUST00000059937.4	-273677	ENSMUSG00000048411	Gm597	predicted gene 597	115893	RP24-365G17.1	ENSMUST00000081488.2	intergenic	intergenic	-0.0993436	-0.537183	0.106292	0.746958	0.873091
chr1	29074543	29074726	184	*	PND_Adult_NF_peak_3486	71	4.86483	9.14834	7.17275	114	Distal Intergenic	1	28776117	28780252	4136	2	210962	ENSMUST00000059937.4	-294291	ENSMUSG00000048411	Gm597	predicted gene 597	136507	RP24-365G17.1	ENSMUST00000081488.2	intergenic	intergenic	1.51673	-1.3342	13.7863	0.000958284	0.0184015
chr1	29082704	29082976	273	*	PND_Adult_NF_peak_3487	205	8.64859	22.752	20.5293	186	Distal Intergenic	1	28776117	28780252	4136	2	210962	ENSMUST00000059937.4	-302452	ENSMUSG00000048411	Gm597	predicted gene 597	-136724	RP24-430C1.1	ENSMUST00000186678.1	intergenic	intergenic	0.420971	-0.95306	1.37867	0.250741	0.491048
chr1	29165100	29165290	191	*	PND_Adult_NF_peak_3491	260	9.99993	28.3188	26.0322	117	Distal Intergenic	1	29421488	29421612	125	1	102465174	ENSMUST00000183870.1	-256198	ENSMUSG00000099257	Mir6342	microRNA 6342	-54410	RP24-430C1.1	ENSMUST00000186678.1	intergenic	intergenic	0.5848	-1.04221	2.95687	0.097139	0.287284
chr1	29171252	29171570	319	*	PND_Adult_NF_peak_3493	416	13.5134	44.0637	41.6413	136	Distal Intergenic	1	29421488	29421612	125	1	102465174	ENSMUST00000183870.1	-249918	ENSMUSG00000099257	Mir6342	microRNA 6342	-48130	RP24-430C1.1	ENSMUST00000186678.1	intergenic	intergenic	0.0064433	-0.127784	0.000681013	0.979376	0.991134
chr1	29180333	29180446	114	*	PND_Adult_NF_peak_3495	124	4.12729	14.5975	12.4987	58	Distal Intergenic	1	29421488	29421612	125	1	102465174	ENSMUST00000183870.1	-241042	ENSMUSG00000099257	Mir6342	microRNA 6342	-39254	RP24-430C1.1	ENSMUST00000186678.1	intergenic	intergenic	0.723408	-1.15011	4.6036	0.041202	0.174115
chr1	29181182	29181635	454	*	PND_Adult_NF_peak_3496	3423	30.8872	345.819	342.336	184	Distal Intergenic	1	29421488	29421612	125	1	102465174	ENSMUST00000183870.1	-239853	ENSMUSG00000099257	Mir6342	microRNA 6342	-38065	RP24-430C1.1	ENSMUST00000186678.1	intergenic	intergenic	0.164482	3.00319	1.67543	0.206666	0.440942
chr1	29205928	29206185	258	*	PND_Adult_NF_peak_3497	163	7.56752	18.5361	16.3714	47	Distal Intergenic	1	29421488	29421612	125	1	102465174	ENSMUST00000183870.1	-215303	ENSMUSG00000099257	Mir6342	microRNA 6342	-13515	RP24-430C1.1	ENSMUST00000186678.1	intergenic	intergenic	0.844164	-0.392893	11.5433	0.00215409	0.030119
chr1	29264947	29265255	309	*	PND_Adult_NF_peak_3501	441	14.054	46.6254	44.1848	216	Distal Intergenic	1	29421488	29421612	125	1	102465174	ENSMUST00000183870.1	-156233	ENSMUSG00000099257	Mir6342	microRNA 6342	-15820	Gm25586	ENSMUST00000082499.1	intergenic	intergenic	0.571569	-0.293246	5.24731	0.030146	0.144759
chr1	29266092	29266248	157	*	PND_Adult_NF_peak_3502	184	8.10805	20.6158	18.4212	90	Distal Intergenic	1	29421488	29421612	125	1	102465174	ENSMUST00000183870.1	-155240	ENSMUSG00000099257	Mir6342	microRNA 6342	-14827	Gm25586	ENSMUST00000082499.1	intergenic	intergenic	0.791624	-0.785606	7.05103	0.0132171	0.0884392
chr1	29454101	29454265	165	*	PND_Adult_NF_peak_3504	34	3.51349	5.2676	3.43108	127	Distal Intergenic	1	29421488	29421612	125	1	102465174	ENSMUST00000183870.1	32613	ENSMUSG00000099257	Mir6342	microRNA 6342	-31650	RP23-313K8.2	ENSMUST00000190438.1	intergenic	intergenic	1.0881	-0.995468	11.9632	0.00184327	0.0273843
chr1	29484662	29485252	591	*	PND_Adult_NF_peak_3505	233	8.97731	25.6121	23.3567	277	Exon (ENSMUST00000190438.1/ENSMUST00000190438.1, exon 1 of 1)	1	29421488	29421612	125	1	102465174	ENSMUST00000183870.1	63174	ENSMUSG00000099257	Mir6342	microRNA 6342	-663	RP23-313K8.2	ENSMUST00000190438.1	exonic	proximal <=1000bp	0.516813	0.479833	6.75541	0.0150608	0.0956202
chr1	29485428	29485894	467	*	PND_Adult_NF_peak_3506	100	5.63861	12.0745	10.0284	435	Exon (ENSMUST00000190438.1/ENSMUST00000190438.1, exon 1 of 1)	1	29421488	29421612	125	1	102465174	ENSMUST00000183870.1	63940	ENSMUSG00000099257	Mir6342	microRNA 6342	-21	RP23-313K8.2	ENSMUST00000190438.1	exonic	proximal <=1000bp	0.31678	-0.149354	1.85011	0.185195	0.414174
chr1	29570940	29571379	440	*	PND_Adult_NF_peak_3507	917	23.2431	94.4456	91.7517	287	Distal Intergenic	1	29421488	29421612	125	1	102465174	ENSMUST00000183870.1	149452	ENSMUSG00000099257	Mir6342	microRNA 6342	85025	RP23-313K8.2	ENSMUST00000190438.1	intergenic	intergenic	0.418691	0.542655	5.14011	0.0317325	0.149408
chr1	29737142	29737533	392	*	PND_Adult_NF_peak_3509	1392	30.153	142.167	139.292	153	Distal Intergenic	1	29421488	29421612	125	1	102465174	ENSMUST00000183870.1	315654	ENSMUSG00000099257	Mir6342	microRNA 6342	-192561	RP24-229N7.1	ENSMUST00000190177.1	intergenic	intergenic	0.252798	0.763288	2.51447	0.124632	0.331571
chr1	29791296	29791522	227	*	PND_Adult_NF_peak_3510	306	11.081	32.9821	30.65	115	Distal Intergenic	1	29421488	29421612	125	1	102465174	ENSMUST00000183870.1	369808	ENSMUSG00000099257	Mir6342	microRNA 6342	-138572	RP24-229N7.1	ENSMUST00000190177.1	intergenic	intergenic	0.702763	-0.442959	6.98351	0.0136153	0.0899749
chr1	29822675	29822898	224	*	PND_Adult_NF_peak_3511	533	15.9458	55.8439	53.3435	76	Distal Intergenic	1	29421488	29421612	125	1	102465174	ENSMUST00000183870.1	401187	ENSMUSG00000099257	Mir6342	microRNA 6342	-107196	RP24-229N7.1	ENSMUST00000190177.1	intergenic	intergenic	-0.0560372	-0.749085	0.0251068	0.875299	0.941601
chr1	29985516	29985754	239	*	PND_Adult_NF_peak_3514	391	12.9729	41.5363	39.1328	130	Distal Intergenic	1	29421488	29421612	125	1	102465174	ENSMUST00000183870.1	564028	ENSMUSG00000099257	Mir6342	microRNA 6342	-180	Gm23771	ENSMUST00000178702.1	intergenic	proximal <=1000bp	0.0420534	-0.749523	0.0194488	0.890139	0.949141
chr1	30007373	30007724	352	*	PND_Adult_NF_peak_3515	803	20.068	82.9957	80.3528	198	Distal Intergenic	1	29421488	29421612	125	1	102465174	ENSMUST00000183870.1	585885	ENSMUSG00000099257	Mir6342	microRNA 6342	21439	Gm23771	ENSMUST00000178702.1	intergenic	intergenic	-0.0116966	0.744846	0.00252383	0.960354	0.982478
chr1	30082293	30082644	352	*	PND_Adult_NF_peak_3517	305	10.1665	32.8608	30.5315	126	Distal Intergenic	1	29421488	29421612	125	1	102465174	ENSMUST00000183870.1	660805	ENSMUSG00000099257	Mir6342	microRNA 6342	96359	Gm23771	ENSMUST00000178702.1	intergenic	intergenic	-0.333366	-0.560004	1.13288	0.296736	0.5387
chr1	30085252	30085490	239	*	PND_Adult_NF_peak_3518	158	6.67271	18.0305	15.8754	138	Distal Intergenic	1	29421488	29421612	125	1	102465174	ENSMUST00000183870.1	663764	ENSMUSG00000099257	Mir6342	microRNA 6342	99318	Gm23771	ENSMUST00000178702.1	intergenic	intergenic	0.633564	-0.412854	5.82721	0.0229508	0.122702
chr1	30249914	30250110	197	*	PND_Adult_NF_peak_3524	614	17.5675	64.0319	61.4842	100	Distal Intergenic	1	30806205	30809105	2901	2	213109	ENSMUST00000190190.1	558995	ENSMUSG00000048874	Phf3	PHD finger protein 3	-83287	Gm27430	ENSMUST00000184585.1	intergenic	intergenic	0.184237	-0.908643	0.332321	0.569146	0.762432
chr1	30262291	30262699	409	*	PND_Adult_NF_peak_3525	556	15.5795	58.1431	55.6295	306	Distal Intergenic	1	30806205	30809105	2901	2	213109	ENSMUST00000190190.1	546406	ENSMUSG00000048874	Phf3	PHD finger protein 3	-70698	Gm27430	ENSMUST00000184585.1	intergenic	intergenic	0.841718	1.04573	21.8846	7.48719e-05	0.00390774
chr1	30274468	30274843	376	*	PND_Adult_NF_peak_3526	330	11.6215	35.3775	33.0241	176	Distal Intergenic	1	30806205	30809105	2901	2	213109	ENSMUST00000190190.1	534262	ENSMUSG00000048874	Phf3	PHD finger protein 3	-58554	Gm27430	ENSMUST00000184585.1	intergenic	intergenic	0.498873	-0.212813	4.78663	0.0376577	0.165307
chr1	30418558	30418667	110	*	PND_Adult_NF_peak_3533	226	9.18913	24.9415	22.6922	61	Distal Intergenic	1	30806205	30809105	2901	2	213109	ENSMUST00000190190.1	390438	ENSMUSG00000048874	Phf3	PHD finger protein 3	85161	Gm27430	ENSMUST00000184585.1	intergenic	intergenic	0.0696017	-0.632206	0.0706428	0.792454	0.898596
chr1	30419700	30419892	193	*	PND_Adult_NF_peak_3534	115	6.21617	13.6121	11.532	121	Distal Intergenic	1	30806205	30809105	2901	2	213109	ENSMUST00000190190.1	389213	ENSMUSG00000048874	Phf3	PHD finger protein 3	86303	Gm27430	ENSMUST00000184585.1	intergenic	intergenic	0.258373	-1.13947	0.626085	0.435799	0.662808
chr1	30495585	30495930	346	*	PND_Adult_NF_peak_3537	1756	30.1181	178.681	175.684	100	Distal Intergenic	1	30806205	30809105	2901	2	213109	ENSMUST00000190190.1	313175	ENSMUSG00000048874	Phf3	PHD finger protein 3	162188	Gm27430	ENSMUST00000184585.1	intergenic	intergenic	-0.232021	1.41387	2.78554	0.106857	0.303264
chr1	30515368	30515687	320	*	PND_Adult_NF_peak_3538	189	7.4382	21.1796	18.979	112	Distal Intergenic	1	30806205	30809105	2901	2	213109	ENSMUST00000190190.1	293418	ENSMUSG00000048874	Phf3	PHD finger protein 3	181971	Gm27430	ENSMUST00000184585.1	intergenic	intergenic	0.235126	0.185822	1.22955	0.277428	0.519474
chr1	30515978	30516386	409	*	PND_Adult_NF_peak_3539	408	11.911	43.2653	40.8494	54	Distal Intergenic	1	30806205	30809105	2901	2	213109	ENSMUST00000190190.1	292719	ENSMUSG00000048874	Phf3	PHD finger protein 3	182581	Gm27430	ENSMUST00000184585.1	intergenic	intergenic	-0.204533	1.19163	1.88027	0.18177	0.409799
chr1	30540184	30540671	488	*	PND_Adult_NF_peak_3541	811	20.4275	83.7982	81.1518	295	Distal Intergenic	1	30806205	30809105	2901	2	213109	ENSMUST00000190190.1	268434	ENSMUSG00000048874	Phf3	PHD finger protein 3	-179291	RP24-172B22.1	ENSMUST00000065469.2	intergenic	intergenic	-0.30058	0.975521	2.95178	0.0974123	0.287755
chr1	30551113	30551416	304	*	PND_Adult_NF_peak_3542	2779	40.1666	281.245	277.944	172	Distal Intergenic	1	30806205	30809105	2901	2	213109	ENSMUST00000190190.1	257689	ENSMUSG00000048874	Phf3	PHD finger protein 3	-168546	RP24-172B22.1	ENSMUST00000065469.2	intergenic	intergenic	0.334432	1.43339	3.77096	0.0629232	0.223091
chr1	30588027	30588521	495	*	PND_Adult_NF_peak_3546	78	5.04372	9.82431	7.83573	392	Distal Intergenic	1	30806205	30809105	2901	2	213109	ENSMUST00000190190.1	220584	ENSMUSG00000048874	Phf3	PHD finger protein 3	-131441	RP24-172B22.1	ENSMUST00000065469.2	intergenic	intergenic	0.695654	0.0175644	9.63064	0.00450222	0.046635
chr1	30637572	30637774	203	*	PND_Adult_NF_peak_3547	30	3.30028	4.88355	3.07243	172	Distal Intergenic	1	30806205	30809105	2901	2	213109	ENSMUST00000190190.1	171331	ENSMUSG00000048874	Phf3	PHD finger protein 3	-82188	RP24-172B22.1	ENSMUST00000065469.2	intergenic	intergenic	0.278557	-0.715979	0.854713	0.36354	0.601894
chr1	30638473	30638562	90	*	PND_Adult_NF_peak_3548	73	4.79164	9.33466	7.35554	50	Distal Intergenic	1	30806205	30809105	2901	2	213109	ENSMUST00000190190.1	170543	ENSMUSG00000048874	Phf3	PHD finger protein 3	-81400	RP24-172B22.1	ENSMUST00000065469.2	intergenic	intergenic	-0.204496	-0.463761	0.514751	0.479348	0.696722
chr1	30638960	30639203	244	*	PND_Adult_NF_peak_3549	349	11.6008	37.2854	34.9168	152	Distal Intergenic	1	30806205	30809105	2901	2	213109	ENSMUST00000190190.1	169902	ENSMUSG00000048874	Phf3	PHD finger protein 3	-80759	RP24-172B22.1	ENSMUST00000065469.2	intergenic	intergenic	-0.390568	0.401352	4.47825	0.0438439	0.180555
chr1	30698406	30699012	607	*	PND_Adult_NF_peak_3552	263	9.60894	28.6674	26.378	391	Distal Intergenic	1	30806205	30809105	2901	2	213109	ENSMUST00000190190.1	110093	ENSMUSG00000048874	Phf3	PHD finger protein 3	-20950	RP24-172B22.1	ENSMUST00000065469.2	intergenic	intergenic	0.200275	1.02481	1.54954	0.224067	0.461278
chr1	30769855	30770116	262	*	PND_Adult_NF_peak_3553	56	3.59094	7.55296	5.62669	42	Exon (ENSMUST00000188572.1/ENSMUST00000188572.1, exon 1 of 4)	1	30806205	30809105	2901	2	213109	ENSMUST00000190190.1	38989	ENSMUSG00000048874	Phf3	PHD finger protein 3	168	RP24-172B22.2	ENSMUST00000188572.1	exonic	proximal <=1000bp	0.686399	-0.0263897	9.14753	0.00546555	0.0525028
chr1	30770200	30770303	104	*	PND_Adult_NF_peak_3554	14	2.302	3.08983	1.41041	13	Exon (ENSMUST00000188572.1/ENSMUST00000188572.1, exon 1 of 4)	1	30806205	30809105	2901	2	213109	ENSMUST00000190190.1	38802	ENSMUSG00000048874	Phf3	PHD finger protein 3	513	RP24-172B22.2	ENSMUST00000188572.1	exonic	proximal <=1000bp	0.467426	-0.49852	2.35723	0.136522	0.348889
chr1	30770496	30770978	483	*	PND_Adult_NF_peak_3555	119	5.06924	14.0863	11.9994	121	Exon (ENSMUST00000188572.1/ENSMUST00000188572.1, exon 2 of 4)	1	30806205	30809105	2901	2	213109	ENSMUST00000190190.1	38127	ENSMUSG00000048874	Phf3	PHD finger protein 3	809	RP24-172B22.2	ENSMUST00000188572.1	exonic	proximal <=1000bp	0.169363	0.538281	0.793069	0.381164	0.617066
chr1	30771739	30772077	339	*	PND_Adult_NF_peak_3556	129	5.31399	15.1022	12.9965	199	Exon (ENSMUST00000188572.1/ENSMUST00000188572.1, exon 4 of 4)	1	30806205	30809105	2901	2	213109	ENSMUST00000190190.1	37028	ENSMUSG00000048874	Phf3	PHD finger protein 3	2052	RP24-172B22.2	ENSMUST00000188572.1	exonic	exonic	0.383412	0.106821	2.58939	0.119396	0.323136
chr1	30778529	30778890	362	*	PND_Adult_NF_peak_3557	279	10.0687	30.2439	27.9393	69	Distal Intergenic	1	30806205	30809105	2901	2	213109	ENSMUST00000190190.1	30215	ENSMUSG00000048874	Phf3	PHD finger protein 3	8842	RP24-172B22.2	ENSMUST00000188572.1	intergenic	intergenic	0.258448	0.200171	1.77717	0.193811	0.42534
chr1	30780386	30780548	163	*	PND_Adult_NF_peak_3558	724	19.1869	75.0083	72.4039	90	Distal Intergenic	1	30806205	30809105	2901	2	213109	ENSMUST00000190190.1	28557	ENSMUSG00000048874	Phf3	PHD finger protein 3	10699	RP24-172B22.2	ENSMUST00000188572.1	intergenic	intergenic	-0.0192206	-0.468923	0.00565868	0.9406	0.973535
chr1	30786122	30786232	111	*	PND_Adult_NF_peak_3559	44	3.84082	6.34435	4.46655	56	Distal Intergenic	1	30806205	30809105	2901	2	213109	ENSMUST00000190190.1	22873	ENSMUSG00000048874	Phf3	PHD finger protein 3	-8643	RP24-172B22.4	ENSMUST00000186120.1	intergenic	intergenic	-0.089216	-0.964511	0.0886172	0.768257	0.884735
chr1	30786401	30786521	121	*	PND_Adult_NF_peak_3560	68	4.66256	8.76239	6.802	64	Distal Intergenic	1	30806205	30809105	2901	2	213109	ENSMUST00000190190.1	22584	ENSMUSG00000048874	Phf3	PHD finger protein 3	-8354	RP24-172B22.4	ENSMUST00000186120.1	intergenic	intergenic	-0.512453	0.0304391	4.02728	0.0550407	0.206403
chr1	30786775	30786877	103	*	PND_Adult_NF_peak_3561	66	4.60018	8.64197	6.68407	31	Distal Intergenic	1	30806205	30809105	2901	2	213109	ENSMUST00000190190.1	22228	ENSMUSG00000048874	Phf3	PHD finger protein 3	-7998	RP24-172B22.4	ENSMUST00000186120.1	intergenic	intergenic	-0.697355	0.00775848	7.49734	0.0108851	0.0789099
chr1	30787312	30787530	219	*	PND_Adult_NF_peak_3562	96	4.10559	11.6431	9.60963	130	Distal Intergenic	1	30806205	30809105	2901	2	213109	ENSMUST00000190190.1	21575	ENSMUSG00000048874	Phf3	PHD finger protein 3	-7345	RP24-172B22.4	ENSMUST00000186120.1	intergenic	intergenic	-0.115707	0.293382	0.20152	0.657371	0.819781
chr1	30792012	30792250	239	*	PND_Adult_NF_peak_3563	4550	43.3038	458.895	455.097	158	Distal Intergenic	1	30806205	30809105	2901	2	213109	ENSMUST00000190190.1	16855	ENSMUSG00000048874	Phf3	PHD finger protein 3	-2625	RP24-172B22.4	ENSMUST00000186120.1	intergenic	intergenic	-0.040256	1.94628	0.0679553	0.796354	0.900754
chr1	30803671	30803917	247	*	PND_Adult_NF_peak_3564	75	3.76962	9.54225	7.55916	128	3' UTR	1	30806205	30809105	2901	2	213109	ENSMUST00000190190.1	5188	ENSMUSG00000048874	Phf3	PHD finger protein 3	-5188	Phf3	ENSMUST00000190190.1	exonic	exonic	0.284938	-0.140533	1.4307	0.242212	0.481717
chr1	30804514	30805093	580	*	PND_Adult_NF_peak_3565	280	7.3729	30.3118	28.0067	331	3' UTR	1	30806205	30809105	2901	2	213109	ENSMUST00000190190.1	4012	ENSMUSG00000048874	Phf3	PHD finger protein 3	-4012	Phf3	ENSMUST00000190190.1	exonic	exonic	0.100449	1.87997	0.504571	0.483685	0.700075
chr1	30807534	30807722	189	*	PND_Adult_NF_peak_3566	1153	18.6743	118.159	115.37	86	Intron (ENSMUST00000186733.6/213109, intron 14 of 15)	1	30806205	30809105	2901	2	213109	ENSMUST00000190190.1	1383	ENSMUSG00000048874	Phf3	PHD finger protein 3	-1383	Phf3	ENSMUST00000190190.1	intronic	intronic	0.0510089	0.384758	0.0576344	0.812117	0.909289
chr1	30833827	30834029	203	*	PND_Adult_NF_peak_3567	416	13.5134	44.0637	41.6413	119	Exon (ENSMUST00000195437.1/ENSMUST00000195437.1, exon 1 of 1)	1	30811904	30813535	1632	2	213109	ENSMUST00000187316.1	-20292	ENSMUSG00000048874	Phf3	PHD finger protein 3	-2402	RP24-172B22.6	ENSMUST00000195437.1	exonic	exonic	0.152459	-0.825753	0.249028	0.621866	0.797121
chr1	30867334	30867568	235	*	PND_Adult_NF_peak_3568	572	15.6262	59.7905	57.2674	131	Exon (ENSMUST00000192050.1/ENSMUST00000192050.1, exon 1 of 1)	1	30802342	30863256	60915	2	213109	ENSMUST00000088310.9	-4078	ENSMUSG00000048874	Phf3	PHD finger protein 3	-970	RP23-471J16.2	ENSMUST00000192050.1	exonic	proximal <=1000bp	0.207428	-0.0738395	0.67263	0.41943	0.649518
chr1	30872753	30873066	314	*	PND_Adult_NF_peak_3569	4827	21.5094	486.639	482.765	117	Promoter	1	30802339	30873581	71243	2	213109	ENSMUST00000186733.6	515	ENSMUSG00000048874	Phf3	PHD finger protein 3	-186	Phf3	ENSMUST00000187968.1	exonic	proximal <=1000bp	0.591421	3.28872	32.5175	4.91755e-06	0.000747402
chr1	30873607	30874283	677	*	PND_Adult_NF_peak_3570	1905	11.6357	193.583	190.54	413	Promoter	1	30813571	30873695	60125	2	213109	ENSMUST00000186105.6	0	ENSMUSG00000048874	Phf3	PHD finger protein 3	0	Phf3	ENSMUST00000186105.6	exonic	TSS	0.258569	3.6082	5.19127	0.0309641	0.147138
chr1	30874400	30874848	449	*	PND_Adult_NF_peak_3571	1539	10.2098	156.875	153.95	175	Promoter	1	30815315	30873921	58607	2	213109	ENSMUST00000191245.6	-479	ENSMUSG00000048874	Phf3	PHD finger protein 3	479	Phf3	ENSMUST00000191245.6	intergenic	proximal <=1000bp	0.710288	2.85118	39.1168	1.16271e-06	0.000305025
chr1	30886991	30887291	301	*	PND_Adult_NF_peak_3572	5342	41.2173	538.305	534.29	115	Distal Intergenic	1	30815315	30873921	58607	2	213109	ENSMUST00000191245.6	-13070	ENSMUSG00000048874	Phf3	PHD finger protein 3	13070	Phf3	ENSMUST00000191245.6	intergenic	intergenic	0.330876	3.02378	8.12267	0.00834128	0.067437
chr1	30904184	30904395	212	*	PND_Adult_NF_peak_3574	283	10.5405	30.6286	28.3187	124	Distal Intergenic	1	30815315	30873921	58607	2	213109	ENSMUST00000191245.6	-30263	ENSMUSG00000048874	Phf3	PHD finger protein 3	30263	Phf3	ENSMUST00000191245.6	intergenic	intergenic	-0.0425781	-0.751995	0.0249582	0.875665	0.941789
chr1	30927973	30928143	171	*	PND_Adult_NF_peak_3577	79	4.90507	9.89065	7.90078	77	Distal Intergenic	1	30943221	30944304	1084	2	433406	ENSMUST00000130934.1	16161		Gm13363	predicted gene 13363	-16161	Ptp4a1	ENSMUST00000130934.1	intergenic	intergenic	0.572885	-1.35695	2.30034	0.14115	0.355542
chr1	30929486	30929655	170	*	PND_Adult_NF_peak_3579	291	10.3692	31.4888	29.1721	63	Distal Intergenic	1	30943221	30944304	1084	2	433406	ENSMUST00000130934.1	14649		Gm13363	predicted gene 13363	-14649	Ptp4a1	ENSMUST00000130934.1	intergenic	intergenic	0.129866	-0.336435	0.202678	0.656218	0.819058
chr1	30937743	30937891	149	*	PND_Adult_NF_peak_3580	103	4.96459	12.4148	10.3632	97	Downstream (2-3kb)	1	30943221	30944304	1084	2	433406	ENSMUST00000130934.1	6413		Gm13363	predicted gene 13363	-6413	Ptp4a1	ENSMUST00000130934.1	intergenic	intergenic	0.40335	-0.461222	2.71078	0.111447	0.310927
chr1	30938090	30938423	334	*	PND_Adult_NF_peak_3581	109	5.08208	13.0539	10.9873	281	Downstream (1-2kb)	1	30943221	30944304	1084	2	433406	ENSMUST00000130934.1	5881		Gm13363	predicted gene 13363	-5881	Ptp4a1	ENSMUST00000130934.1	intergenic	intergenic	0.0949176	0.918379	0.210242	0.650438	0.815293
chr1	30938982	30939305	324	*	PND_Adult_NF_peak_3582	71	4.10766	9.07658	7.10958	34	Downstream (<1kb)	1	30943221	30944304	1084	2	433406	ENSMUST00000130934.1	4999		Gm13363	predicted gene 13363	-4999	Ptp4a1	ENSMUST00000130934.1	intergenic	intergenic	0.792879	0.184667	13.5768	0.00103127	0.0192188
chr1	30939403	30939496	94	*	PND_Adult_NF_peak_3583	27	2.83666	4.53567	2.75153	65	Downstream (<1kb)	1	30943221	30944304	1084	2	433406	ENSMUST00000130934.1	4808		Gm13363	predicted gene 13363	-4808	Ptp4a1	ENSMUST00000130934.1	intergenic	intergenic	1.04681	-1.01137	12.783	0.0013675	0.022957
chr1	30941327	30941451	125	*	PND_Adult_NF_peak_3584	278	8.17922	30.1679	27.8638	59	3' UTR	1	30943221	30944304	1084	2	433406	ENSMUST00000130934.1	2853		Gm13363	predicted gene 13363	-2853	Ptp4a1	ENSMUST00000130934.1	exonic	exonic	0.62579	-0.684969	3.87158	0.059626	0.216396
chr1	30949007	30949306	300	*	PND_Adult_NF_peak_3585	748	7.53849	77.4384	74.822	90	Promoter	1	30940302	30949309	9008	2	19243	ENSMUST00000232841.1	3	ENSMUSG00000026064	Ptp4a1	protein tyrosine phosphatase 4a1	-3	Ptp4a1	ENSMUST00000124445.2	exonic	proximal <=1000bp	0.333395	2.42841	6.95844	0.0137664	0.0906611
chr1	30949451	30949555	105	*	PND_Adult_NF_peak_3586	32	2.07134	5.10455	3.28636	94	Promoter	1	30940302	30949309	9008	2	19243	ENSMUST00000232841.1	-142	ENSMUSG00000026064	Ptp4a1	protein tyrosine phosphatase 4a1	-32	Ptp4a1	ENSMUST00000202889.1	exonic	proximal <=1000bp	0.442359	1.15421	6.79927	0.0147702	0.0944599
chr1	30949660	30950197	538	*	PND_Adult_NF_peak_3587	5598	27.8692	563.902	559.816	143	Promoter	1	30940303	30949755	9453	2	19243	ENSMUST00000027232.14	0	ENSMUSG00000026064	Ptp4a1	protein tyrosine phosphatase 4a1	0	Ptp4a1	ENSMUST00000076587.4	exonic	TSS	0.747591	4.07066	50.5093	1.32989e-07	7.31566e-05
chr1	30950277	30950397	121	*	PND_Adult_NF_peak_3588	67	2.55271	8.7544	6.79418	34	Promoter	1	30940302	30949770	9469	2	19243	ENSMUST00000233506.1	-507	ENSMUSG00000026064	Ptp4a1	protein tyrosine phosphatase 4a1	507	Ptp4a1	ENSMUST00000027232.13	intergenic	proximal <=1000bp	1.3409	0.317809	43.8739	4.50035e-07	0.000164852
[truncated: 64,356 more rows]

## Sheet: DARs
Peak-seqnames	Peak-start	Peak-end	Peak-width	Peak-strand	Peak-Name	Peak-Score	Peak-FoldChange	Peak-negLog10pvalue	Peak-negLog10qvalue	Peak-Summit	Peak-annotation	Peak-geneChr	Peak-geneStart	Peak-geneEnd	Peak-geneLength	Peak-geneStrand	Peak-geneId	Peak-transcriptId	Peak-distanceToTSS	Peak-ENSEMBL	Peak-SYMBOL	Peak-GENENAME	Peak-distance2nearestTSS_pa	Peak-nearestTSS.gene_name_pa	Peak-nearestTSS_pa	Peak-overlap_pa	Peak-class_pa	diffAccessibility-logFC	diffAccessibility-logCPM	diffAccessibility-F	diffAccessibility-PValue	diffAccessibility-qvalue
[truncated: 3,212 more rows]
