# Supplementary material for: Dynamics of transcriptional programs and chromatin accessibility in mouse spermatogonial cells from early postnatal to adult life
Source: bioRxiv preprint, doi:10.1101/2020.08.20.259374, version 3 (2024-05-29)
Supplement: Table S5 [file 259374_file11.xls]

## Sheet: TEs_diff_accessibility
seqnames	start	end	width	strand	source	type	score	phase	gene_id	transcript_id	family_id	class_id	distance2nearestTSS	nearestTSS.gene_name	nearestTSS	overlap	class	class_n	logFC	logCPM	F	PValue	qvalue	subtype_logFC	subtype_logCPM	subtype_F	subtype_PValue	subtype_qvalue	agg_pval	agg_qval	ATAC_PND15_Adult	ATAC_Adult	ATAC_PND15	ChIP_PNW8_H3K27ac	ChIP_PNW8_H3K27me3	ChIP_PNW8_H3K4me3
chr1	3053689	3054124	436	*	mm10_rmsk	exon	3318		RLTR45-int	RLTR45-int_dup1	ERVK	LTR	-19129	RP23-271O17.1	ENSMUST00000193812.1	intergenic	intergenic	intergenic	-1.27066	-1.544	9.75901	0.00275006	0.0306337	-0.184551	9.21581	14.6526	0.00194092	0.00405961	0	0	FALSE	FALSE	FALSE	FALSE	FALSE	FALSE
chr1	3117993	3118111	119	*	mm10_rmsk	exon	280		MLT1A1	MLT1A1_dup2	ERVL-MaLR	LTR	15977	Gm26206	ENSMUST00000082908.1	intergenic	intergenic	intergenic	-1.19004	0.910214	20.7365	2.64047e-05	0.000836572	0.072902	10.5674	5.94489	0.0291465	0.0460014	0	0	TRUE	TRUE	TRUE	FALSE	FALSE	FALSE
chr1	3118143	3118352	210	*	mm10_rmsk	exon	1019		B3	B3_dup9	B2	SINE	16127	Gm26206	ENSMUST00000082908.1	intergenic	intergenic	intergenic	-1.42536	0.549542	33.6856	2.6225e-07	2.59181e-05	-0.0408682	15.0047	1.97967	0.18188	0.229711	0	0	TRUE	TRUE	TRUE	FALSE	FALSE	FALSE
chr1	3119632	3119778	147	*	mm10_rmsk	exon	330		B1F1	B1F1_dup1	Alu	SINE	17616	Gm26206	ENSMUST00000082908.1	intergenic	intergenic	intergenic	-2.33827	-0.84306	29.6227	1.95404e-06	0.000112399	-0.20613	12.0803	22.9816	0.000310097	0.000836142	0	0	TRUE	FALSE	TRUE	FALSE	FALSE	FALSE
chr1	3121630	3121965	336	*	mm10_rmsk	exon	1822		RLTRETN_Mm	RLTRETN_Mm	ERVK	LTR	19614	Gm26206	ENSMUST00000082908.1	intergenic	intergenic	intergenic	-1.26577	-1.43283	10.9991	0.00155308	0.0200836	-0.536374	9.3262	60.9698	2.73033e-06	2.18231e-05	0	0	FALSE	FALSE	FALSE	FALSE	FALSE	FALSE
chr1	3185143	3186116	974	*	mm10_rmsk	exon	4098		RMER17A2	RMER17A2	ERVK	LTR	-29516	Xkr4	ENSMUST00000159265.1	intergenic	intergenic	intergenic	-1.12184	1.2294	21.6813	1.83568e-05	0.000627524	-0.0432949	10.7533	0.0935766	0.765807	0.790533	0	0	TRUE	FALSE	TRUE	FALSE	FALSE	FALSE
chr1	3334990	3336335	1346	*	mm10_rmsk	exon	4973		L1Md_F	L1Md_F_dup4	L1	LINE	-32214	RP23-317L18.4	ENSMUST00000195335.1	intronic	intronic	gene_body	1.23367	-1.13697	15.4968	0.000218052	0.00442485	0.68782	11.2456	113.731	7.70863e-08	3.05101e-06	0	0	FALSE	FALSE	FALSE	FALSE	FALSE	FALSE
chr1	3340844	3340896	53	*	mm10_rmsk	exon	252		RLTR9D2	RLTR9D2_dup1	ERVK	LTR	-27653	RP23-317L18.4	ENSMUST00000195335.1	intronic	intronic	gene_body	-1.55054	-2.12305	8.50473	0.00497955	0.0467334	0.0996223	6.14913	2.61958	0.128515	0.169987	6.60713e-56	1.22999e-55	TRUE	FALSE	TRUE	FALSE	FALSE	FALSE
chr1	3361488	3361667	180	*	mm10_rmsk	exon	409		MER5B	MER5B	hAT-Charlie	DNA	-6882	RP23-317L18.4	ENSMUST00000195335.1	intronic	intronic	gene_body	-1.03479	-0.329494	12.7543	0.000708258	0.011089	-0.136316	9.79195	32.305	6.32242e-05	0.000221713	0	0	TRUE	TRUE	TRUE	FALSE	FALSE	TRUE
chr1	3383438	3383898	461	*	mm10_rmsk	exon	3163		L1_Mus1	L1_Mus1_dup21	L1	LINE	5650	RP23-317L18.3	ENSMUST00000192336.1	intronic	intronic	gene_body	1.75391	-2.08697	14.1204	0.000391116	0.00700247	0.568501	13.4728	115.916	4.95501e-08	3.05101e-06	0	0	FALSE	FALSE	FALSE	FALSE	FALSE	FALSE
chr1	3445706	3445798	93	*	mm10_rmsk	exon	293		MMERVK9E_I-int	MMERVK9E_I-int_dup2	ERVK	LTR	-20789	RP23-115I1.1	ENSMUST00000161581.1	intronic	intronic	gene_body	-1.37282	-1.11831	13.9155	0.00042717	0.00749921	-0.0194732	9.82517	0.255096	0.6216	0.664346	0	0	TRUE	TRUE	FALSE	FALSE	FALSE	FALSE
chr1	3445799	3446307	509	*	mm10_rmsk	exon	2775		RLTR45	RLTR45	ERVK	LTR	-20280	RP23-115I1.1	ENSMUST00000161581.1	intronic	intronic	gene_body	-1.41627	-0.208882	24.604	6.14023e-06	0.00026875	0.414845	8.60792	50.8163	6.0251e-06	3.84355e-05	2.69704e-156	7.83458e-156	TRUE	FALSE	TRUE	FALSE	FALSE	FALSE
chr1	3502322	3502442	121	*	mm10_rmsk	exon	520		B1F	B1F_dup8	Alu	SINE	-12065	RP23-115I1.5	ENSMUST00000192973.1	intronic	intronic	gene_body	-1.78465	-2.02809	13.0381	0.000625319	0.0100871	-0.210784	13.2074	26.2569	0.000169765	0.00050658	0	0	TRUE	FALSE	TRUE	FALSE	FALSE	FALSE
chr1	3532933	3533016	84	*	mm10_rmsk	exon	342		ID4_	ID4__dup5	ID	SINE	1138	RP23-115I1.2	ENSMUST00000192183.1	intronic	intronic	gene_body	-1.21481	-0.0865735	21.0361	2.35178e-05	0.000763385	-0.141335	12.0045	20.1414	0.000548502	0.00134679	0	0	TRUE	TRUE	TRUE	FALSE	FALSE	FALSE
chr1	3533240	3533348	109	*	mm10_rmsk	exon	435		B1F1	B1F1_dup2	Alu	SINE	1445	RP23-115I1.2	ENSMUST00000192183.1	intronic	intronic	gene_body	-1.31532	0.317129	30.2302	8.3563e-07	6.00365e-05	-0.20613	12.0803	22.9816	0.000310097	0.000836142	0	0	TRUE	FALSE	TRUE	FALSE	FALSE	FALSE
chr1	3536148	3537818	1671	*	mm10_rmsk	exon	5882		L1VL1	L1VL1_dup5	L1	LINE	4353	RP23-115I1.2	ENSMUST00000192183.1	intronic	intronic	gene_body	1.04838	-1.4216	8.79333	0.00433719	0.0424252	0.408941	9.79875	95.693	1.58574e-07	3.87825e-06	0	0	FALSE	FALSE	FALSE	FALSE	FALSE	FALSE
chr1	3556745	3557035	291	*	mm10_rmsk	exon	1825		RLTR27	RLTR27	ERVK	LTR	24950	RP23-115I1.2	ENSMUST00000192183.1	intronic	intronic	gene_body	-1.18783	0.195142	18.3672	6.71823e-05	0.00175058	-0.799988	10.5008	19.9396	0.00118207	0.00261929	0	0	TRUE	TRUE	TRUE	FALSE	FALSE	TRUE
chr1	3562956	3564414	1459	*	mm10_rmsk	exon	11191		L1_Mur3	L1_Mur3_dup20	L1	LINE	31161	RP23-115I1.2	ENSMUST00000192183.1	intronic	intronic	gene_body	1.32339	-1.87058	8.64818	0.00464863	0.0445368	0.334543	12.3059	85.3852	3.12894e-07	5.33454e-06	0	0	FALSE	FALSE	FALSE	FALSE	FALSE	FALSE
chr1	3583816	3583932	117	*	mm10_rmsk	exon	286		Lx9	Lx9_dup31	L1	LINE	-11971	RP23-115I1.3	ENSMUST00000195166.1	intronic	intronic	gene_body	-1.48478	-1.4377	15.3479	0.000232135	0.00465009	0.366266	13.1834	126.776	2.85574e-08	2.45813e-06	0	0	FALSE	FALSE	FALSE	FALSE	FALSE	FALSE
chr1	3583950	3584927	978	*	mm10_rmsk	exon	1655		RMER17B	RMER17B	ERVK	LTR	-10976	RP23-115I1.3	ENSMUST00000195166.1	intronic	intronic	gene_body	-1.01636	0.912326	19.14	4.93648e-05	0.00137028	-0.640441	12.3098	31.6377	0.000180857	0.000533981	0	0	TRUE	TRUE	TRUE	FALSE	FALSE	FALSE
chr1	3691702	3692002	301	*	mm10_rmsk	exon	1449		ORR1B1-int	ORR1B1-int	ERVL-MaLR	LTR	11547	RP23-122M2.2	ENSMUST00000193244.1	intergenic	intergenic	intergenic	-1.06586	-0.90461	11.1806	0.00143019	0.0188905	0.312658	9.65688	106.325	8.39243e-08	3.05101e-06	0	0	FALSE	FALSE	FALSE	FALSE	FALSE	FALSE
chr1	3878052	3878443	392	*	mm10_rmsk	exon	1881		L1Md_F	L1Md_F_dup6	L1	LINE	94119	Gm27396	ENSMUST00000157708.2	intergenic	intergenic	intergenic	-1.11255	-0.685818	14.5665	0.000323163	0.00603016	0.68782	11.2456	113.731	7.70863e-08	3.05101e-06	0	0	TRUE	FALSE	TRUE	FALSE	FALSE	FALSE
chr1	3898614	3898809	196	*	mm10_rmsk	exon	1106		Lx	Lx_dup27	L1	LINE	-87175	RP23-333I7.1	ENSMUST00000192427.1	intergenic	intergenic	intergenic	1.96653	-2.57259	9.69699	0.0028309	0.0312788	0.402447	13.336	70.3906	9.67384e-07	1.0572e-05	0	0	FALSE	FALSE	FALSE	FALSE	FALSE	FALSE
chr1	3934260	3934834	575	*	mm10_rmsk	exon	3452		RLTR17	RLTR17	ERVK	LTR	-51150	RP23-333I7.1	ENSMUST00000192427.1	intronic	intronic	gene_body	-1.30233	2.53793	26.9176	2.65794e-06	0.000141556	-1.02879	11.7239	35.9714	0.000128195	0.000404086	0	0	TRUE	TRUE	TRUE	FALSE	FALSE	FALSE
chr1	3934816	3934878	63	*	mm10_rmsk	exon	227		RLTR16B_MM	RLTR16B_MM	ERVK	LTR	-51106	RP23-333I7.1	ENSMUST00000192427.1	intronic	intronic	gene_body	-1.70171	-0.235506	34.1209	2.27374e-07	2.345e-05	-0.937943	9.56878	42.4368	6.0659e-05	0.000213451	0	0	TRUE	FALSE	FALSE	FALSE	FALSE	FALSE
chr1	3934901	3935395	495	*	mm10_rmsk	exon	2536		Lx9	Lx9_dup38	L1	LINE	-50589	RP23-333I7.1	ENSMUST00000192427.1	intronic	intronic	gene_body	-1.01859	-1.12243	8.71161	0.00450974	0.0435884	0.366266	13.1834	126.776	2.85574e-08	2.45813e-06	0	0	FALSE	FALSE	FALSE	FALSE	FALSE	FALSE
chr1	3957842	3958924	1083	*	mm10_rmsk	exon	9662		Lx4A	Lx4A_dup8	L1	LINE	-27060	RP23-333I7.1	ENSMUST00000192427.1	intronic	intronic	gene_body	1.92144	-2.36815	10.4176	0.00202658	0.0244771	0.386963	11.9984	67.5375	1.22707e-06	1.22598e-05	0	0	FALSE	FALSE	FALSE	FALSE	FALSE	FALSE
chr1	3994253	3994750	498	*	mm10_rmsk	exon	1652		RMER17C	RMER17C_dup1	ERVK	LTR	8038	RP23-333I7.1	ENSMUST00000194643.1	intergenic	intergenic	intergenic	2.04951	-1.34291	27.6851	2.02423e-06	0.000115391	-0.174785	11.5718	3.94549	0.0712389	0.1022	0	0	FALSE	TRUE	FALSE	FALSE	FALSE	FALSE
chr1	4043522	4043698	177	*	mm10_rmsk	exon	1696		RMER10B	RMER10B_dup4	ERVL	LTR	57307	RP23-333I7.1	ENSMUST00000194643.1	intronic	intronic	gene_body	-1.60396	-1.58642	14.0738	0.000399026	0.00711075	-0.184869	9.88573	39.0409	2.43875e-05	0.000107064	0	0	TRUE	FALSE	TRUE	FALSE	FALSE	FALSE
chr1	4044771	4045069	299	*	mm10_rmsk	exon	1812		Lx2	Lx2_dup20	L1	LINE	58556	RP23-333I7.1	ENSMUST00000194643.1	intronic	intronic	gene_body	1.97533	-2.6761	8.38777	0.00526763	0.0486124	0.329614	12.88	47.1621	9.02254e-06	5.15113e-05	0	0	FALSE	FALSE	FALSE	FALSE	FALSE	FALSE
chr1	4132517	4133388	872	*	mm10_rmsk	exon	27254		L1_Mus4	L1_Mus4_dup15	L1	LINE	-127131	RP23-177A20.1	ENSMUST00000195384.1	intronic	intronic	gene_body	1.56059	-1.83761	13.7762	0.000453635	0.00785808	0.534569	12.2714	89.1906	2.41524e-07	5.00491e-06	0	0	FALSE	FALSE	FALSE	FALSE	FALSE	FALSE
chr1	4144554	4147309	2756	*	mm10_rmsk	exon	14217		L1VL4	L1VL4_dup10	L1	LINE	-113210	RP23-177A20.1	ENSMUST00000195384.1	intronic	intronic	gene_body	1.17497	-1.43782	9.56704	0.00300843	0.0327021	0.46762	11.3684	120.293	3.9467e-08	2.94424e-06	0	0	FALSE	FALSE	FALSE	FALSE	FALSE	FALSE
chr1	4171463	4173452	1990	*	mm10_rmsk	exon	8588		L1_Mus3	L1_Mus3_dup54	L1	LINE	-87067	RP23-177A20.1	ENSMUST00000195384.1	intronic	intronic	gene_body	1.04848	-1.12473	10.1941	0.00224666	0.0264229	0.491166	14.0232	104.073	9.55672e-08	3.14529e-06	0	0	FALSE	FALSE	FALSE	FALSE	FALSE	FALSE
chr1	4254490	4255472	983	*	mm10_rmsk	exon	7809		L1Md_F2	L1Md_F2_dup92	L1	LINE	-5047	RP23-177A20.1	ENSMUST00000195384.1	intronic	intronic	gene_body	1.11713	-1.20727	11.6873	0.00113797	0.0159177	0.519061	15.1429	139.838	1.55383e-08	1.93193e-06	0	0	FALSE	FALSE	FALSE	FALSE	FALSE	FALSE
chr1	4270122	4271166	1045	*	mm10_rmsk	exon	2474		RMER3D-int	RMER3D-int_dup1	ERVK	LTR	9603	RP23-177A20.1	ENSMUST00000195384.1	intronic	intronic	gene_body	1.16791	-1.58858	9.36816	0.00330304	0.0349727	0.182093	9.27953	24.4231	0.000236284	0.0006657	0	0	FALSE	FALSE	FALSE	FALSE	FALSE	TRUE
chr1	4388273	4388684	412	*	mm10_rmsk	exon	9628		Lx6	Lx6_dup18	L1	LINE	-20503	Rp1	ENSMUST00000194992.6	intronic	intronic	gene_body	-1.20756	-1.18404	11.727	0.00111787	0.0157063	0.298114	12.3587	77.597	5.49313e-07	7.53997e-06	0	0	TRUE	FALSE	TRUE	FALSE	FALSE	FALSE
chr1	4394758	4395161	404	*	mm10_rmsk	exon	2848		RLTR9F	RLTR9F_dup1	ERVK	LTR	-14026	Rp1	ENSMUST00000194992.6	intronic	intronic	gene_body	-1.3394	1.02342	31.2967	5.81413e-07	4.59402e-05	-0.250231	7.53211	19.5599	0.000620313	0.0014992	5.51556e-183	1.74582e-182	TRUE	TRUE	TRUE	FALSE	FALSE	TRUE
chr1	4395165	4395536	372	*	mm10_rmsk	exon	1522		ETnERV2-int	ETnERV2-int	ERVK	LTR	-13651	Rp1	ENSMUST00000194992.6	intronic	intronic	gene_body	-1.25853	0.849284	26.8708	2.70263e-06	0.000143303	0.131158	9.20419	7.86341	0.0143927	0.024521	1.00403e-303	4.61202e-303	TRUE	TRUE	TRUE	FALSE	FALSE	FALSE
chr1	4460319	4460523	205	*	mm10_rmsk	exon	1063		ORR1B1	ORR1B1_dup7	ERVL-MaLR	LTR	-33081	Sox17	ENSMUST00000192505.1	intergenic	intergenic	intergenic	1.83755	-2.61607	8.39228	0.00525619	0.0485399	-0.0271086	12.3851	0.725931	0.408968	0.463194	0	0	FALSE	FALSE	FALSE	FALSE	FALSE	FALSE
chr1	4479428	4479512	85	*	mm10_rmsk	exon	276		PB1D10	PB1D10_dup15	Alu	SINE	-14092	Sox17	ENSMUST00000192505.1	intergenic	intergenic	intergenic	-1.7563	-0.340658	31.7369	5.01239e-07	4.1248e-05	-0.196601	13.5951	25.3633	0.00019904	0.000578507	0	0	FALSE	FALSE	FALSE	FALSE	TRUE	TRUE
chr1	4555050	4556514	1465	*	mm10_rmsk	exon	7036		Lx	Lx_dup31	L1	LINE	19764	RP23-285G23.4	ENSMUST00000193889.1	intergenic	intergenic	intergenic	1.17481	-1.42598	10.7822	0.00171445	0.02161	0.402447	13.336	70.3906	9.67384e-07	1.0572e-05	0	0	FALSE	FALSE	FALSE	FALSE	FALSE	FALSE
chr1	4604544	4604630	87	*	mm10_rmsk	exon	348		L1M4	L1M4_dup6	L1	LINE	-5841	RP23-37D15.2	ENSMUST00000192738.1	intergenic	intergenic	intergenic	-1.5011	-0.338332	28.0176	1.80042e-06	0.000105771	0.0357156	11.0706	1.17363	0.297501	0.350425	0	0	TRUE	FALSE	TRUE	FALSE	FALSE	FALSE
chr1	4607143	4608138	996	*	mm10_rmsk	exon	8580		L1Md_T	L1Md_T_dup36	L1	LINE	-2333	RP23-37D15.2	ENSMUST00000192738.1	intergenic	intergenic	intergenic	1.15775	-1.6621	9.48998	0.00311918	0.0335623	0.582381	14.4509	129.235	2.53579e-08	2.36462e-06	0	0	FALSE	FALSE	FALSE	FALSE	FALSE	TRUE
chr1	4610002	4610097	96	*	mm10_rmsk	exon	724		Lx4A	Lx4A_dup14	L1	LINE	-374	RP23-37D15.2	ENSMUST00000192738.1	intergenic	proximal <=1000bp	Tss_prox_1kbp	-1.00591	-0.84852	11.7057	0.00112861	0.0158214	0.386963	11.9984	67.5375	1.22707e-06	1.22598e-05	0	0	TRUE	FALSE	TRUE	FALSE	FALSE	TRUE
chr1	4610112	4610265	154	*	mm10_rmsk	exon	1037		B1_Mus2	B1_Mus2_dup17	Alu	SINE	-206	RP23-37D15.2	ENSMUST00000192738.1	intergenic	proximal <=1000bp	Tss_prox_1kbp	-1.55425	-0.50898	27.1616	2.43678e-06	0.000132525	-0.176162	13.8323	10.0652	0.00699884	0.0128811	0	0	TRUE	FALSE	TRUE	FALSE	FALSE	TRUE
chr1	4613923	4613992	70	*	mm10_rmsk	exon	191		L2c	L2c_dup5	L2	LINE	3452	RP23-37D15.2	ENSMUST00000192738.1	intergenic	intergenic	intergenic	-1.3789	-0.205998	26.3111	3.30238e-06	0.000167328	-0.103946	11.2892	15.3661	0.00162344	0.00345367	0	0	FALSE	FALSE	FALSE	FALSE	FALSE	FALSE
chr1	4653103	4653212	110	*	mm10_rmsk	exon	825		B2_Mm2	B2_Mm2_dup28	B2	SINE	-36191	RP23-34E15.1	ENSMUST00000182774.1	intergenic	intergenic	intergenic	-2.17703	-2.20283	14.3586	0.000353157	0.00646056	0.10167	14.026	5.41603	0.0359684	0.0559787	0	0	TRUE	FALSE	TRUE	FALSE	FALSE	FALSE
chr1	4653214	4653354	141	*	mm10_rmsk	exon	331		ID_B1	ID_B1_dup23	B4	SINE	-36049	RP23-34E15.1	ENSMUST00000182774.1	intergenic	intergenic	intergenic	-2.75297	-1.52043	38.2324	6.10878e-08	9.38241e-06	-0.175808	14.6041	23.3246	0.000290382	0.000788684	0	0	TRUE	FALSE	TRUE	FALSE	FALSE	FALSE
chr1	4653520	4653572	53	*	mm10_rmsk	exon	240		B1F	B1F_dup17	Alu	SINE	-35831	RP23-34E15.1	ENSMUST00000182774.1	intergenic	intergenic	intergenic	-1.8748	-1.85439	14.7673	0.000296703	0.00563769	-0.210784	13.2074	26.2569	0.000169765	0.00050658	0	0	FALSE	FALSE	FALSE	FALSE	FALSE	FALSE
chr1	4666739	4666844	106	*	mm10_rmsk	exon	360		PB1D7	PB1D7_dup5	Alu	SINE	-22559	RP23-34E15.1	ENSMUST00000182774.1	intergenic	intergenic	intergenic	2.46527	-2.88925	8.40554	0.00522274	0.0483229	-0.319159	12.459	36.3072	3.53263e-05	0.000141179	0	0	FALSE	FALSE	FALSE	FALSE	FALSE	FALSE
chr1	4673633	4674074	442	*	mm10_rmsk	exon	758		L1MC3	L1MC3_dup2	L1	LINE	-15329	RP23-34E15.1	ENSMUST00000182774.1	intergenic	intergenic	intergenic	-1.20847	0.667953	26.1487	3.50101e-06	0.000174901	0.156006	10.0493	36.6562	3.36549e-05	0.000135956	0	0	TRUE	TRUE	TRUE	FALSE	FALSE	FALSE
chr1	4678989	4679223	235	*	mm10_rmsk	exon	782		RLTR41	RLTR41_dup1	ERV1	LTR	-10180	RP23-34E15.1	ENSMUST00000182774.1	intergenic	intergenic	intergenic	-1.12527	-1.30579	10.8278	0.00167916	0.0212755	-0.261583	9.03222	23.3614	0.000288351	0.000785072	0	0	TRUE	FALSE	TRUE	FALSE	FALSE	FALSE
chr1	4679224	4680242	1019	*	mm10_rmsk	exon	14091		L1_Mus3	L1_Mus3_dup70	L1	LINE	-9161	RP23-34E15.1	ENSMUST00000182774.1	intergenic	intergenic	intergenic	-1.13577	-1.32104	10.4569	0.00199024	0.0241518	0.491166	14.0232	104.073	9.55672e-08	3.14529e-06	0	0	TRUE	FALSE	TRUE	FALSE	FALSE	FALSE
chr1	4720559	4720965	407	*	mm10_rmsk	exon	2895		RLTR10A	RLTR10A	ERVK	LTR	-2414	Gm25493	ENSMUST00000157375.1	intergenic	intergenic	intergenic	-1.73774	-1.01756	20.8491	2.52794e-05	0.000808164	-0.423761	9.70929	4.36398	0.0631353	0.0917512	5.72517e-296	2.56724e-295	TRUE	FALSE	TRUE	FALSE	FALSE	FALSE
chr1	4765875	4766016	142	*	mm10_rmsk	exon	684		B1_Mur2	B1_Mur2_dup18	Alu	SINE	-5115	RP23-34E15.4	ENSMUST00000193658.1	intergenic	intergenic	intergenic	-1.03764	-1.28938	8.86187	0.0041978	0.0414527	-0.133884	12.7428	10.2743	0.00656262	0.0121381	0	0	FALSE	FALSE	FALSE	FALSE	FALSE	FALSE
chr1	4766027	4766205	179	*	mm10_rmsk	exon	694		B3A	B3A_dup35	B2	SINE	-4926	RP23-34E15.4	ENSMUST00000193658.1	intergenic	intergenic	intergenic	-1.17794	-0.942365	11.2963	0.00135719	0.0181647	-0.0693289	14.2699	6.57714	0.0228853	0.0371879	0	0	FALSE	FALSE	FALSE	FALSE	FALSE	FALSE
chr1	4766381	4766527	147	*	mm10_rmsk	exon	1263		B1_Mus2	B1_Mus2_dup21	Alu	SINE	-4604	RP23-34E15.4	ENSMUST00000193658.1	intergenic	intergenic	intergenic	-1.41211	-1.5409	11.495	0.00124073	0.0169837	-0.176162	13.8323	10.0652	0.00699884	0.0128811	0	0	FALSE	FALSE	FALSE	FALSE	FALSE	FALSE
chr1	4767293	4767430	138	*	mm10_rmsk	exon	1224		B1_Mus1	B1_Mus1_dup37	Alu	SINE	-3701	RP23-34E15.4	ENSMUST00000193658.1	intergenic	intergenic	intergenic	-1.36133	0.702832	30.3065	8.14086e-07	5.89113e-05	-0.146129	14.2108	8.59991	0.011203	0.0196492	0	0	TRUE	TRUE	TRUE	FALSE	FALSE	TRUE
chr1	4835862	4836008	147	*	mm10_rmsk	exon	792		B1_Mur3	B1_Mur3_dup10	Alu	SINE	-897	Lypla1	ENSMUST00000141278.1	intronic	proximal <=1000bp	Tss_prox_1kbp	-1.37482	-1.19579	16.2765	0.000157529	0.00342496	-0.199309	12.3985	15.6938	0.00149799	0.00323602	0	0	TRUE	FALSE	TRUE	FALSE	FALSE	FALSE
chr1	4847204	4847288	85	*	mm10_rmsk	exon	388		ORR1D2	ORR1D2_dup9	ERVL-MaLR	LTR	10299	Lypla1	ENSMUST00000141278.1	intronic	intronic	gene_body	-1.19702	-1.30793	10.1644	0.00227776	0.0266979	-0.192417	11.9933	47.1146	9.07148e-06	5.15279e-05	0	0	TRUE	FALSE	TRUE	FALSE	FALSE	FALSE
chr1	4855110	4855254	145	*	mm10_rmsk	exon	1073		B1_Mus2	B1_Mus2_dup40	Alu	SINE	-2560	Tcea1	ENSMUST00000081551.13	intronic	intronic	gene_body	-1.33564	-0.0436839	21.9451	1.65987e-05	0.000580451	-0.176162	13.8323	10.0652	0.00699884	0.0128811	0	0	FALSE	FALSE	FALSE	FALSE	FALSE	FALSE
chr1	4855255	4855410	156	*	mm10_rmsk	exon	1266		RMER5	RMER5_dup4	ERV1	LTR	-2404	Tcea1	ENSMUST00000081551.13	intronic	intronic	gene_body	-1.40614	0.208193	29.1428	1.21538e-06	7.90173e-05	-0.0928129	11.0315	12.5981	0.0033416	0.00657162	0	0	FALSE	FALSE	FALSE	FALSE	FALSE	FALSE
chr1	4856199	4856313	115	*	mm10_rmsk	exon	355		ID_B1	ID_B1_dup27	B4	SINE	-1501	Tcea1	ENSMUST00000081551.13	intronic	intronic	gene_body	-1.46234	0.0263347	28.5356	1.50149e-06	9.23416e-05	-0.175808	14.6041	23.3246	0.000290382	0.000788684	0	0	TRUE	FALSE	TRUE	FALSE	FALSE	FALSE
chr1	4856362	4856585	224	*	mm10_rmsk	exon	814		B4	B4_dup30	B4	SINE	-1229	Tcea1	ENSMUST00000081551.13	intronic	intronic	gene_body	-1.07842	0.270316	19.4688	4.33448e-05	0.0012347	0.0559679	13.6316	3.88846	0.0693232	0.0998362	0	0	TRUE	FALSE	TRUE	TRUE	FALSE	FALSE
chr1	4866241	4866263	23	*	mm10_rmsk	exon	532		B1_Mur1	B1_Mur1_dup15	Alu	SINE	8203	Tcea1	ENSMUST00000165720.2	intronic	intronic	gene_body	-1.641	-2.11625	10.397	0.00204587	0.0246449	-0.179663	13.0741	14.4372	0.00205038	0.00424761	0	0	FALSE	FALSE	FALSE	FALSE	FALSE	FALSE
chr1	4882565	4882709	145	*	mm10_rmsk	exon	339		L1MC4	L1MC4_dup6	L1	LINE	1914	RP24-426M1.2	ENSMUST00000078030.4	intronic	intronic	gene_body	-1.22777	-0.448053	18.3981	6.6355e-05	0.00173312	0.0613184	9.92339	3.21274	0.0953456	0.132044	0	0	TRUE	TRUE	TRUE	FALSE	FALSE	FALSE
chr1	4882742	4883157	416	*	mm10_rmsk	exon	1683		MTD	MTD_dup39	ERVL-MaLR	LTR	2091	RP24-426M1.2	ENSMUST00000078030.4	intronic	intronic	gene_body	-1.21557	-0.249662	17.5484	9.34931e-05	0.00227115	-0.128328	13.8494	24.9898	0.000212962	0.000611037	0	0	TRUE	TRUE	TRUE	FALSE	FALSE	FALSE
chr1	4923700	4923771	72	*	mm10_rmsk	exon	231		ID_B1	ID_B1_dup30	B4	SINE	-3528	RP24-141F9.1	ENSMUST00000168963.1	exonic	exonic	gene_body	-1.51639	-1.05944	19.9205	3.62889e-05	0.00107329	-0.175808	14.6041	23.3246	0.000290382	0.000788684	0	0	TRUE	TRUE	TRUE	FALSE	FALSE	TRUE
chr1	4938867	4939126	260	*	mm10_rmsk	exon	925		MLTR14	MLTR14_dup4	ERV1	LTR	-1584	RP24-141F9.2	ENSMUST00000194114.1	exonic	exonic	gene_body	-1.83778	-0.79079	35.1543	1.62486e-07	1.85239e-05	-0.0952499	10.955	14.6774	0.00192872	0.00404165	0	0	TRUE	FALSE	TRUE	FALSE	FALSE	FALSE
chr1	4958336	4960352	2017	*	mm10_rmsk	exon	13038		L1VL2	L1VL2_dup13	L1	LINE	-10505	AC102242.1	ENSMUST00000144339.1	intronic	intronic	gene_body	-1.45849	-0.440336	24.9053	5.49789e-06	0.00024682	0.412803	11.1411	86.8287	2.83295e-07	5.12027e-06	0	0	TRUE	FALSE	TRUE	FALSE	FALSE	FALSE
chr1	4990851	4991416	566	*	mm10_rmsk	exon	2846		L1_Mur3	L1_Mur3_dup40	L1	LINE	19994	AC102242.1	ENSMUST00000144339.1	intronic	intronic	gene_body	-1.63725	-0.941416	23.3671	9.70864e-06	0.000383182	0.334543	12.3059	85.3852	3.12894e-07	5.33454e-06	0	0	FALSE	FALSE	FALSE	FALSE	FALSE	FALSE
chr1	4991420	4991707	288	*	mm10_rmsk	exon	1373		BGLII_A	BGLII_A	ERVK	LTR	20563	AC102242.1	ENSMUST00000144339.1	intronic	intronic	gene_body	-1.55573	1.83694	39.8936	3.6518e-08	6.64494e-06	-0.0822906	6.27622	4.66443	0.0491862	0.0732881	1.94759e-71	3.96536e-71	TRUE	TRUE	TRUE	FALSE	FALSE	FALSE
chr1	4991708	4991979	272	*	mm10_rmsk	exon	1594		RLTR17	RLTR17_dup2	ERVK	LTR	20851	AC102242.1	ENSMUST00000144339.1	intronic	intronic	gene_body	-1.4072	3.03523	30.8254	6.82109e-07	5.17459e-05	-1.02879	11.7239	35.9714	0.000128195	0.000404086	0	0	TRUE	TRUE	TRUE	FALSE	FALSE	TRUE
chr1	4992016	4992106	91	*	mm10_rmsk	exon	445		L1Md_F2	L1Md_F2_dup109	L1	LINE	21159	AC102242.1	ENSMUST00000144339.1	intronic	intronic	gene_body	-1.74242	-1.46526	16.1812	0.00016388	0.00353351	0.519061	15.1429	139.838	1.55383e-08	1.93193e-06	0	0	FALSE	FALSE	FALSE	FALSE	FALSE	TRUE
chr1	5007038	5007412	375	*	mm10_rmsk	exon	1731		ORR1C2	ORR1C2_dup6	ERVL-MaLR	LTR	-11323	Rgs20	ENSMUST00000119256.7	intronic	intronic	gene_body	2.19122	-2.66654	10.4971	0.00195379	0.023828	0.0855834	11.3203	11.3945	0.0046982	0.00891066	0	0	FALSE	FALSE	FALSE	FALSE	FALSE	FALSE
chr1	5009079	5009297	219	*	mm10_rmsk	exon	1121		RMER15	RMER15_dup9	ERVL	LTR	-9438	Rgs20	ENSMUST00000119256.7	intronic	intronic	gene_body	-1.55837	-2.18015	9.58711	0.00298027	0.0324775	-0.386955	12.6786	57.0863	3.17301e-06	2.43192e-05	0	0	FALSE	FALSE	TRUE	FALSE	FALSE	FALSE
chr1	5009314	5009795	482	*	mm10_rmsk	exon	1030		RLTR34C_MM	RLTR34C_MM_dup1	ERVK	LTR	-8940	Rgs20	ENSMUST00000119256.7	intronic	intronic	gene_body	-1.26715	-0.451909	20.6697	2.70978e-05	0.000854062	-0.830569	8.47904	83.1438	1.06591e-06	1.10524e-05	0	0	TRUE	FALSE	TRUE	FALSE	FALSE	FALSE
chr1	5017675	5017806	132	*	mm10_rmsk	exon	452		B3	B3_dup96	B2	SINE	-929	Rgs20	ENSMUST00000119256.7	intronic	proximal <=1000bp	Tss_prox_1kbp	-1.17219	-1.46288	10.5688	0.00189052	0.0232502	-0.0408682	15.0047	1.97967	0.18188	0.229711	0	0	FALSE	FALSE	FALSE	FALSE	TRUE	FALSE
chr1	5158718	5158811	94	*	mm10_rmsk	exon	237		Lx8	Lx8_dup54	L1	LINE	75554	Atp6v1h	ENSMUST00000192142.1	intronic	intronic	gene_body	-1.95607	0.0708516	55.5267	4.29252e-10	4.47458e-07	0.121817	13.7403	15.9377	0.00141182	0.00306763	0	0	TRUE	TRUE	TRUE	FALSE	FALSE	FALSE
chr1	5158814	5159481	668	*	mm10_rmsk	exon	3695		RLTR17	RLTR17_dup3	ERVK	LTR	75650	Atp6v1h	ENSMUST00000192142.1	intronic	intronic	gene_body	-1.7592	2.46809	50.8648	1.50733e-09	9.11524e-07	-1.02879	11.7239	35.9714	0.000128195	0.000404086	0	0	TRUE	TRUE	TRUE	FALSE	FALSE	FALSE
chr1	5183688	5183822	135	*	mm10_rmsk	exon	413		MTEa	MTEa_dup22	ERVL-MaLR	LTR	-93515	RP23-267J18.11	ENSMUST00000193351.1	intergenic	intergenic	intergenic	-1.72734	-0.686381	29.6607	1.01613e-06	6.92343e-05	-0.2922	12.679	58.9166	2.66017e-06	2.14153e-05	0	0	TRUE	FALSE	TRUE	FALSE	FALSE	FALSE
chr1	5226057	5226274	218	*	mm10_rmsk	exon	937		RLTR16C_MM	RLTR16C_MM	ERVK	LTR	-51063	RP23-267J18.11	ENSMUST00000193351.1	intergenic	intergenic	intergenic	-1.30189	0.0686929	26.8523	2.72051e-06	0.000144062	-0.934187	8.63343	51.7549	2.28744e-05	0.000101978	0	0	TRUE	FALSE	TRUE	FALSE	FALSE	FALSE
chr1	5261298	5261496	199	*	mm10_rmsk	exon	1002		RLTR13G	RLTR13G_dup2	ERVK	LTR	-15841	RP23-267J18.11	ENSMUST00000193351.1	intergenic	intergenic	intergenic	-1.20114	-0.946994	14.6448	0.000312565	0.0058729	0.138842	7.57714	15.4805	0.00157832	0.00339643	1.3853e-88	3.07542e-88	TRUE	FALSE	TRUE	FALSE	FALSE	FALSE
chr1	5283187	5283338	152	*	mm10_rmsk	exon	543		MERV1_I-int	MERV1_I-int_dup7	ERV1	LTR	5850	RP23-267J18.11	ENSMUST00000193351.1	intergenic	intergenic	intergenic	-1.06556	-0.846156	11.6245	0.00117051	0.0162562	0.376631	9.57002	37.1193	3.35929e-05	0.000135956	0	0	TRUE	TRUE	TRUE	FALSE	FALSE	FALSE
chr1	5283414	5283610	197	*	mm10_rmsk	exon	719		MERV1_LTR	MERV1_LTR	ERV1	LTR	6077	RP23-267J18.11	ENSMUST00000193351.1	intergenic	intergenic	intergenic	-1.25414	-1.66916	8.92372	0.00407604	0.0405888	0.327008	7.2186	22.2039	0.000382746	0.000990399	2.40985e-103	5.75714e-103	FALSE	FALSE	FALSE	FALSE	FALSE	FALSE
chr1	5288262	5289149	888	*	mm10_rmsk	exon	2130		RMER17B	RMER17B_dup5	ERVK	LTR	10925	RP23-267J18.11	ENSMUST00000193351.1	intergenic	intergenic	intergenic	-1.37186	1.39315	32.4854	3.90149e-07	3.44228e-05	-0.640441	12.3098	31.6377	0.000180857	0.000533981	0	0	TRUE	TRUE	TRUE	FALSE	FALSE	TRUE
chr1	5297072	5297225	154	*	mm10_rmsk	exon	361		L1MDa	L1MDa_dup3	L1	LINE	-10514	RP23-267J18.10	ENSMUST00000193241.1	intergenic	intergenic	intergenic	-1.49119	-2.23485	8.35073	0.00536246	0.0492225	-0.0968633	9.30415	9.61972	0.00804533	0.0145413	0	0	FALSE	FALSE	FALSE	FALSE	FALSE	FALSE
chr1	5380608	5380889	282	*	mm10_rmsk	exon	1975		IAP1-MM_LTR	IAP1-MM_LTR	ERVK	LTR	-22658	RP23-335P21.1	ENSMUST00000194850.1	intergenic	intergenic	intergenic	-1.09712	-0.943958	12.3425	0.000849552	0.0127413	-0.90342	10.3418	11.3102	0.00753242	0.01375	0	0	TRUE	FALSE	TRUE	FALSE	FALSE	FALSE
chr1	5392643	5393145	503	*	mm10_rmsk	exon	3152		Lx4A	Lx4A_dup21	L1	LINE	-10402	RP23-335P21.1	ENSMUST00000194850.1	intergenic	intergenic	intergenic	2.22136	-2.19087	16.0847	0.000170586	0.00364669	0.386963	11.9984	67.5375	1.22707e-06	1.22598e-05	0	0	FALSE	FALSE	FALSE	FALSE	FALSE	FALSE
chr1	5441242	5441856	615	*	mm10_rmsk	exon	540		L1MB1	L1MB1_dup5	L1	LINE	37695	RP23-335P21.1	ENSMUST00000194850.1	intergenic	intergenic	intergenic	-2.17207	-2.68704	8.84712	0.00422739	0.0416568	0.130858	8.79501	19.6252	0.000611731	0.00148166	4.72299e-239	1.79093e-238	FALSE	FALSE	FALSE	FALSE	FALSE	FALSE
chr1	5505810	5506154	345	*	mm10_rmsk	exon	1078		ORR1E	ORR1E_dup16	ERVL-MaLR	LTR	-82312	Oprk1	ENSMUST00000192685.1	intergenic	intergenic	intergenic	-2.03588	-1.52705	22.434	1.37875e-05	0.000502571	-0.325711	12.9387	82.3757	3.86776e-07	6.01114e-06	0	0	TRUE	FALSE	TRUE	FALSE	FALSE	FALSE
chr1	5516430	5516768	339	*	mm10_rmsk	exon	1466		RLTR9C	RLTR9C	ERVK	LTR	-71698	Oprk1	ENSMUST00000192685.1	intergenic	intergenic	intergenic	-1.47723	-0.626684	23.6453	8.75236e-06	0.000353953	-0.0267686	6.84174	0.26515	0.614876	0.659048	6.0711e-88	1.34517e-87	TRUE	FALSE	TRUE	FALSE	FALSE	FALSE
chr1	5516769	5517023	255	*	mm10_rmsk	exon	2173		RLTR9B2	RLTR9B2_dup1	ERVK	LTR	-71443	Oprk1	ENSMUST00000192685.1	intergenic	intergenic	intergenic	-1.38719	-1.40812	12.0141	0.000983148	0.014246	0.129889	5.7728	2.79491	0.117417	0.15811	7.66355e-43	1.27726e-42	FALSE	FALSE	FALSE	FALSE	FALSE	FALSE
chr1	5586091	5587244	1154	*	mm10_rmsk	exon	3663		Lx5c	Lx5c_dup43	L1	LINE	-1222	Oprk1	ENSMUST00000192685.1	intergenic	intergenic	intergenic	1.09874	-1.13223	10.2583	0.00218104	0.0258478	0.275621	12.3036	49.7246	6.78061e-06	4.22898e-05	0	0	FALSE	FALSE	FALSE	FALSE	FALSE	FALSE
chr1	5675105	5676753	1649	*	mm10_rmsk	exon	6271		L1VL4	L1VL4_dup22	L1	LINE	30360	Gm22463	ENSMUST00000175274.1	intergenic	intergenic	intergenic	1.17081	-1.5285	8.76259	0.00440126	0.0428706	0.46762	11.3684	120.293	3.9467e-08	2.94424e-06	0	0	FALSE	FALSE	FALSE	FALSE	FALSE	FALSE
chr1	5705112	5705837	726	*	mm10_rmsk	exon	4107		Lx2B2	Lx2B2_dup20	L1	LINE	60367	Gm22463	ENSMUST00000175274.1	intergenic	intergenic	intergenic	1.59223	-2.02687	12.4384	0.000814196	0.0123323	0.429993	12.0294	66.9103	1.29439e-06	1.24864e-05	0	0	FALSE	FALSE	FALSE	FALSE	FALSE	FALSE
chr1	5753695	5754421	727	*	mm10_rmsk	exon	2185		Lx8	Lx8_dup60	L1	LINE	-90251	RP23-354J2.1	ENSMUST00000193807.1	intergenic	intergenic	intergenic	1.41993	-1.89274	10.9865	0.00156195	0.0201691	0.121817	13.7403	15.9377	0.00141182	0.00306763	0	0	FALSE	FALSE	FALSE	FALSE	FALSE	FALSE
chr1	5773312	5773473	162	*	mm10_rmsk	exon	697		RLTR18	RLTR18_dup2	ERVK	LTR	-71199	RP23-354J2.1	ENSMUST00000193807.1	intergenic	intergenic	intergenic	-1.87338	-2.12103	14.0097	0.000410184	0.00726768	0.260662	7.57732	73.3557	7.62039e-07	9.34872e-06	2.73362e-103	6.51686e-103	FALSE	FALSE	FALSE	FALSE	FALSE	FALSE
chr1	5788291	5788660	370	*	mm10_rmsk	exon	2121		RLTR44A	RLTR44A_dup1	ERVK	LTR	-56012	RP23-354J2.1	ENSMUST00000193807.1	intergenic	intergenic	intergenic	-1.27487	0.603368	24.1201	7.33906e-06	0.00030844	-0.529365	8.15454	9.005	0.0131758	0.0225784	2.16564e-105	5.25144e-105	TRUE	TRUE	TRUE	FALSE	FALSE	TRUE
chr1	5800171	5801755	1585	*	mm10_rmsk	exon	5270		L1_Mus3	L1_Mus3_dup95	L1	LINE	-42917	RP23-354J2.1	ENSMUST00000193807.1	intergenic	intergenic	intergenic	1.55394	-1.24938	16.3273	0.00015425	0.00336808	0.491166	14.0232	104.073	9.55672e-08	3.14529e-06	0	0	FALSE	FALSE	FALSE	FALSE	FALSE	FALSE
chr1	5856533	5857288	756	*	mm10_rmsk	exon	2452		RMER13A1	RMER13A1_dup1	ERVK	LTR	11861	RP23-354J2.1	ENSMUST00000193807.1	intergenic	intergenic	intergenic	-1.15398	-0.962054	13.1868	0.000585955	0.00959114	-0.315623	9.73001	57.1887	3.14149e-06	2.42596e-05	0	0	FALSE	FALSE	FALSE	FALSE	FALSE	FALSE
chr1	5899027	5899926	900	*	mm10_rmsk	exon	3416		RMER13B	RMER13B_dup3	ERVK	LTR	-17472	Npbwr1	ENSMUST00000044180.4	intergenic	intergenic	intergenic	1.32862	-1.54124	12.1755	0.000914932	0.0134865	-0.464354	11.2305	71.0692	9.15296e-07	1.03456e-05	0	0	FALSE	FALSE	FALSE	FALSE	FALSE	FALSE
chr1	6052170	6053117	948	*	mm10_rmsk	exon	3948		Lx5	Lx5_dup42	L1	LINE	2125	RP23-74E8.1	ENSMUST00000191956.1	intergenic	intergenic	intergenic	1.06989	-1.29205	8.71718	0.00449775	0.0435141	0.344861	12.7349	51.5136	5.59317e-06	3.66009e-05	0	0	FALSE	FALSE	FALSE	FALSE	FALSE	FALSE
chr1	6082648	6082668	21	*	mm10_rmsk	exon	1046		Lx8	Lx8_dup69	L1	LINE	32603	RP23-74E8.1	ENSMUST00000191956.1	intergenic	intergenic	intergenic	-1.23663	-1.61972	9.77955	0.00272382	0.030422	0.121817	13.7403	15.9377	0.00141182	0.00306763	0	0	FALSE	FALSE	FALSE	FALSE	FALSE	FALSE
chr1	6082669	6083022	354	*	mm10_rmsk	exon	1547		RLTR9A3A	RLTR9A3A_dup2	ERVK	LTR	32624	RP23-74E8.1	ENSMUST00000191956.1	intergenic	intergenic	intergenic	-1.45648	-0.0501599	29.9348	9.24696e-07	6.46768e-05	-0.839997	6.99303	117.503	7.13996e-08	3.05101e-06	2.06083e-203	6.95146e-203	TRUE	FALSE	TRUE	FALSE	FALSE	FALSE
chr1	6083023	6083231	209	*	mm10_rmsk	exon	1046		Lx8	Lx8_dup70	L1	LINE	32978	RP23-74E8.1	ENSMUST00000191956.1	intergenic	intergenic	intergenic	-1.8786	-1.36588	23.7151	8.52802e-06	0.000346999	0.121817	13.7403	15.9377	0.00141182	0.00306763	0	0	TRUE	FALSE	TRUE	FALSE	FALSE	FALSE
chr1	6089803	6089817	15	*	mm10_rmsk	exon	4015		RMER19B	RMER19B_dup10	ERVK	LTR	39758	RP23-74E8.1	ENSMUST00000191956.1	intergenic	intergenic	intergenic	-1.50923	-1.81425	12.174	0.000915531	0.013493	0.154616	11.1902	30.1266	8.87635e-05	0.000298277	0	0	TRUE	FALSE	TRUE	FALSE	FALSE	FALSE
chr1	6089818	6090157	340	*	mm10_rmsk	exon	1172		ERVB7_1-LTR_MM	ERVB7_1-LTR_MM_dup4	ERVK	LTR	39773	RP23-74E8.1	ENSMUST00000191956.1	intergenic	intergenic	intergenic	-1.28068	-0.634338	17.5611	9.30107e-05	0.00226204	-0.402549	8.2546	37.0812	3.17415e-05	0.000130957	1.00089e-266	4.09786e-266	TRUE	FALSE	TRUE	FALSE	FALSE	FALSE
chr1	6132968	6133473	506	*	mm10_rmsk	exon	3101		ERVB4_1B-LTR_MM	ERVB4_1B-LTR_MM	ERVK	LTR	-72724	Rb1cc1	ENSMUST00000159906.7	intergenic	intergenic	intergenic	-1.10296	-0.411534	14.7126	0.000303679	0.00573954	-0.208869	8.44548	24.5441	0.000231069	0.000652945	6.2501e-272	2.64517e-271	TRUE	FALSE	TRUE	FALSE	FALSE	FALSE
chr1	6225952	6226125	174	*	mm10_rmsk	exon	273		MIRb	MIRb_dup26	MIR	SINE	-1877	Rb1cc1	ENSMUST00000162795.7	intronic	intronic	gene_body	-1.49729	-0.669961	23.3624	9.72571e-06	0.000383665	-0.165951	13.1579	40.2205	2.09103e-05	9.5896e-05	0	0	TRUE	FALSE	TRUE	FALSE	FALSE	FALSE
chr1	6277402	6277672	271	*	mm10_rmsk	exon	1220		ORR1A3	ORR1A3_dup8	ERVL-MaLR	LTR	6724	Rb1cc1	ENSMUST00000159656.1	intergenic	intergenic	intergenic	-1.22784	-0.6097	19.0597	5.09627e-05	0.00140542	0.113205	10.224	11.7022	0.00429877	0.00826517	0	0	FALSE	FALSE	FALSE	FALSE	FALSE	FALSE
chr1	6282411	6282517	107	*	mm10_rmsk	exon	271		B1F1	B1F1_dup15	Alu	SINE	11733	Rb1cc1	ENSMUST00000159656.1	intergenic	intergenic	intergenic	-1.4069	-0.724034	20.4824	2.91416e-05	0.000903917	-0.20613	12.0803	22.9816	0.000310097	0.000836142	0	0	TRUE	FALSE	TRUE	FALSE	FALSE	FALSE
chr1	6282551	6282882	332	*	mm10_rmsk	exon	1718		ERVB7_2B-LTR_MM	ERVB7_2B-LTR_MM	ERVK	LTR	11873	Rb1cc1	ENSMUST00000159656.1	intergenic	intergenic	intergenic	-1.84878	1.62893	46.8423	4.66016e-09	1.7649e-06	-0.835739	8.79374	51.3472	2.05966e-05	9.52381e-05	0	0	TRUE	TRUE	TRUE	FALSE	FALSE	TRUE
chr1	6282883	6283190	308	*	mm10_rmsk	exon	805		B4A	B4A_dup64	B4	SINE	12205	Rb1cc1	ENSMUST00000159656.1	intergenic	intergenic	intergenic	-1.65925	0.641298	37.0633	8.82328e-08	1.20928e-05	0.0753296	14.4644	7.74941	0.0149756	0.0252756	0	0	TRUE	TRUE	TRUE	FALSE	FALSE	TRUE
chr1	6309546	6309903	358	*	mm10_rmsk	exon	2868		RLTR10D2	RLTR10D2	ERVK	LTR	38868	Rb1cc1	ENSMUST00000159656.1	intergenic	intergenic	intergenic	-1.24705	-1.49822	9.12628	0.00370258	0.0379147	-0.375378	8.73596	2.61922	0.136537	0.179325	1.59871e-123	4.14344e-123	TRUE	FALSE	TRUE	FALSE	FALSE	FALSE
chr1	6319226	6319977	752	*	mm10_rmsk	exon	31580		L1_Mus2	L1_Mus2_dup50	L1	LINE	-39241	Fam150a	ENSMUST00000133144.3	intergenic	intergenic	intergenic	2.09695	-2.04763	17.8111	8.40487e-05	0.00208877	0.484439	13.0175	105.113	8.99763e-08	3.05101e-06	0	0	FALSE	FALSE	FALSE	FALSE	FALSE	FALSE
chr1	6356676	6357090	415	*	mm10_rmsk	exon	1613		ORR1D1	ORR1D1_dup28	ERVL-MaLR	LTR	-2128	Fam150a	ENSMUST00000133144.3	intergenic	intergenic	intergenic	-1.21339	-0.463297	18.767	5.72549e-05	0.00154084	0.0522614	12.1868	4.48196	0.0532154	0.0784558	0	0	TRUE	TRUE	TRUE	FALSE	FALSE	FALSE
chr1	6357328	6357608	281	*	mm10_rmsk	exon	1772		Lx5c	Lx5c_dup53	L1	LINE	-1610	Fam150a	ENSMUST00000133144.3	intergenic	intergenic	intergenic	-1.87572	-1.59856	21.0281	2.35904e-05	0.000765175	0.275621	12.3036	49.7246	6.78061e-06	4.22898e-05	0	0	FALSE	FALSE	FALSE	FALSE	TRUE	FALSE
chr1	6365169	6365573	405	*	mm10_rmsk	exon	3183		L1_Mus1	L1_Mus1_dup74	L1	LINE	5951	Fam150a	ENSMUST00000133144.3	intronic	intronic	gene_body	1.81531	-2.17307	13.5094	0.00050919	0.00859791	0.568501	13.4728	115.916	4.95501e-08	3.05101e-06	0	0	FALSE	FALSE	FALSE	FALSE	FALSE	FALSE
chr1	6383237	6383603	367	*	mm10_rmsk	exon	445		L1MC3	L1MC3_dup14	L1	LINE	131	RP23-76C20.2	ENSMUST00000192950.1	intronic	proximal <=1000bp	Tss_prox_1kbp	-1.10733	-0.383765	15.2529	0.000241598	0.00479885	0.156006	10.0493	36.6562	3.36549e-05	0.000135956	0	0	TRUE	FALSE	TRUE	FALSE	FALSE	TRUE
chr1	6400839	6400998	160	*	mm10_rmsk	exon	992		RMER17B	RMER17B_dup6	ERVK	LTR	17733	RP23-76C20.2	ENSMUST00000192950.1	intergenic	intergenic	intergenic	-1.12078	-0.539819	15.1504	0.000252279	0.00496416	-0.640441	12.3098	31.6377	0.000180857	0.000533981	0	0	TRUE	FALSE	TRUE	FALSE	FALSE	FALSE
chr1	6409666	6410002	337	*	mm10_rmsk	exon	1276		ORR1D2	ORR1D2_dup22	ERVL-MaLR	LTR	26560	RP23-76C20.2	ENSMUST00000192950.1	intergenic	intergenic	intergenic	-1.49156	-1.74727	10.3891	0.00205335	0.0247133	-0.192417	11.9933	47.1146	9.07148e-06	5.15279e-05	0	0	FALSE	FALSE	FALSE	FALSE	FALSE	FALSE
chr1	6410206	6410402	197	*	mm10_rmsk	exon	871		B3	B3_dup142	B2	SINE	27100	RP23-76C20.2	ENSMUST00000192950.1	intergenic	intergenic	intergenic	-1.5105	-0.91354	22.7291	1.23339e-05	0.000461163	-0.0408682	15.0047	1.97967	0.18188	0.229711	0	0	FALSE	FALSE	FALSE	FALSE	FALSE	FALSE
chr1	6442004	6442023	20	*	mm10_rmsk	exon	3868		Lx7	Lx7_dup89	L1	LINE	708	RP23-76C20.4	ENSMUST00000194240.1	intergenic	proximal <=1000bp	Tss_prox_1kbp	-1.08859	-1.39478	8.99539	0.00393957	0.0396313	0.295529	13.1367	105.492	8.80305e-08	3.05101e-06	0	0	FALSE	FALSE	FALSE	FALSE	TRUE	TRUE
chr1	6538430	6538988	559	*	mm10_rmsk	exon	2818		L1_Mus3	L1_Mus3_dup113	L1	LINE	51099	St18	ENSMUST00000131494.7	intronic	intronic	gene_body	1.30671	-1.90981	9.51537	0.00308222	0.0332776	0.491166	14.0232	104.073	9.55672e-08	3.14529e-06	0	0	FALSE	FALSE	FALSE	FALSE	FALSE	FALSE
chr1	6571894	6573357	1464	*	mm10_rmsk	exon	7018		L1_Mus4	L1_Mus4_dup31	L1	LINE	84563	St18	ENSMUST00000131494.7	intronic	intronic	gene_body	1.007	-1.1486	9.47142	0.00314648	0.0337795	0.534569	12.2714	89.1906	2.41524e-07	5.00491e-06	0	0	FALSE	FALSE	FALSE	FALSE	FALSE	FALSE
chr1	6575433	6576698	1266	*	mm10_rmsk	exon	6635		Lx2B2	Lx2B2_dup23	L1	LINE	88102	St18	ENSMUST00000131494.7	intronic	intronic	gene_body	1.13696	-1.26447	10.1486	0.00229451	0.0268408	0.429993	12.0294	66.9103	1.29439e-06	1.24864e-05	0	0	FALSE	FALSE	FALSE	FALSE	FALSE	FALSE
chr1	6641503	6643087	1585	*	mm10_rmsk	exon	6311		Lx7	Lx7_dup97	L1	LINE	-86964	St18	ENSMUST00000043578.12	intronic	intronic	gene_body	1.26561	-1.67283	10.8922	0.00163052	0.0208179	0.295529	13.1367	105.492	8.80305e-08	3.05101e-06	0	0	FALSE	FALSE	FALSE	FALSE	FALSE	FALSE
chr1	6643987	6644854	868	*	mm10_rmsk	exon	6074		L1_Mus3	L1_Mus3_dup116	L1	LINE	-85197	St18	ENSMUST00000043578.12	intronic	intronic	gene_body	1.74294	-1.48533	20.7896	2.58676e-05	0.000822922	0.491166	14.0232	104.073	9.55672e-08	3.14529e-06	0	0	FALSE	FALSE	FALSE	FALSE	FALSE	FALSE
chr1	6656041	6656194	154	*	mm10_rmsk	exon	690		B1_Mur1	B1_Mur1_dup33	Alu	SINE	-73857	St18	ENSMUST00000043578.12	intronic	intronic	gene_body	-1.28851	-1.49553	11.5804	0.00119396	0.0164992	-0.179663	13.0741	14.4372	0.00205038	0.00424761	0	0	TRUE	FALSE	TRUE	FALSE	FALSE	FALSE
chr1	6753293	6753766	474	*	mm10_rmsk	exon	525		MLT1D	MLT1D_dup5	ERVL-MaLR	LTR	15718	St18	ENSMUST00000163727.3	exonic	exonic	gene_body	1.91472	-2.64955	8.52799	0.00492425	0.0463722	0.019482	10.8455	0.379935	0.547824	0.597481	0	0	FALSE	FALSE	FALSE	FALSE	FALSE	FALSE
chr1	6873792	6874309	518	*	mm10_rmsk	exon	3991		ERVB4_1B-LTR_MM	ERVB4_1B-LTR_MM_dup2	ERVK	LTR	9641	RP23-299N6.3	ENSMUST00000195780.2	intergenic	intergenic	intergenic	-1.05728	-0.298681	15.2446	0.000242452	0.00481234	-0.208869	8.44548	24.5441	0.000231069	0.000652945	6.2501e-272	2.64517e-271	TRUE	FALSE	TRUE	FALSE	FALSE	FALSE
chr1	6874310	6874423	114	*	mm10_rmsk	exon	5163		Lx2B2	Lx2B2_dup25	L1	LINE	10159	RP23-299N6.3	ENSMUST00000195780.2	intergenic	intergenic	intergenic	-1.43321	-1.38764	13.6311	0.000483025	0.00825018	0.429993	12.0294	66.9103	1.29439e-06	1.24864e-05	0	0	TRUE	FALSE	TRUE	FALSE	FALSE	FALSE
chr1	6896125	6897313	1189	*	mm10_rmsk	exon	5546		Lx6	Lx6_dup47	L1	LINE	-13247	RP23-299N6.1	ENSMUST00000194393.1	intergenic	intergenic	intergenic	1.11815	-1.63562	8.71181	0.0045093	0.0435864	0.298114	12.3587	77.597	5.49313e-07	7.53997e-06	0	0	FALSE	FALSE	FALSE	FALSE	FALSE	FALSE
chr1	6898285	6898642	358	*	mm10_rmsk	exon	2070		RLTR9D2	RLTR9D2_dup4	ERVK	LTR	-11918	RP23-299N6.1	ENSMUST00000194393.1	intergenic	intergenic	intergenic	1.61834	-2.47656	8.45699	0.00509507	0.047492	0.0996223	6.14913	2.61958	0.128515	0.169987	6.60713e-56	1.22999e-55	FALSE	FALSE	FALSE	FALSE	FALSE	FALSE
chr1	6982311	6982394	84	*	mm10_rmsk	exon	388		PB1D9	PB1D9_dup19	Alu	SINE	-15823	RP23-5K7.3	ENSMUST00000193423.1	intergenic	intergenic	intergenic	-1.86359	-2.05156	11.4593	0.00126087	0.0171908	-0.245535	12.562	18.2067	0.000833525	0.00193109	0	0	TRUE	FALSE	TRUE	FALSE	FALSE	FALSE
chr1	7010404	7010815	412	*	mm10_rmsk	exon	373		RMER10A	RMER10A_dup6	ERVL	LTR	-2947	RP23-5K7.2	ENSMUST00000191883.1	intergenic	intergenic	intergenic	-1.32723	-0.490919	23.3298	9.84507e-06	0.000387248	-0.288616	11.0043	61.0595	2.17634e-06	1.83107e-05	0	0	FALSE	FALSE	FALSE	FALSE	FALSE	FALSE
chr1	7010911	7011313	403	*	mm10_rmsk	exon	2351		RLTR9D	RLTR9D_dup5	ERVK	LTR	-2449	RP23-5K7.2	ENSMUST00000191883.1	intergenic	intergenic	intergenic	-1.54096	0.242927	39.5118	4.10687e-08	7.17563e-06	-0.0375755	8.30441	0.693781	0.419278	0.473911	5.0239e-244	1.92441e-243	TRUE	TRUE	TRUE	FALSE	FALSE	FALSE
chr1	7032466	7032611	146	*	mm10_rmsk	exon	746		B1_Mur3	B1_Mur3_dup24	Alu	SINE	-3304	RP23-5K7.1	ENSMUST00000195648.1	intergenic	intergenic	intergenic	-1.36139	-1.40378	12.2064	0.000902461	0.0133463	-0.199309	12.3985	15.6938	0.00149799	0.00323602	0	0	TRUE	FALSE	TRUE	FALSE	FALSE	FALSE
chr1	7125913	7128014	2102	*	mm10_rmsk	exon	13245		MMERVK9C_I-int	MMERVK9C_I-int_dup2	ERVK	LTR	-8572	RP24-149G24.1	ENSMUST00000182051.1	intronic	intronic	gene_body	-1.027	2.4063	18.4309	6.54862e-05	0.00171453	-0.179867	10.0272	8.76041	0.0107656	0.0189413	0	0	TRUE	TRUE	TRUE	FALSE	FALSE	FALSE
chr1	7129737	7130119	383	*	mm10_rmsk	exon	1783		RLTR9E	RLTR9E_dup6	ERVK	LTR	-6467	RP24-149G24.1	ENSMUST00000182051.1	intronic	intronic	gene_body	-1.24025	-1.69733	9.61865	0.00293656	0.0321379	-0.166882	9.19908	12.3508	0.00357867	0.00699956	0	0	FALSE	FALSE	FALSE	FALSE	FALSE	FALSE
chr1	7175012	7175346	335	*	mm10_rmsk	exon	1317		RMER13A1	RMER13A1_dup4	ERVK	LTR	-2393	RP23-278C19.3	ENSMUST00000029124.7	intergenic	intergenic	intergenic	-1.44086	-0.692609	21.3411	2.09122e-05	0.000695657	-0.315623	9.73001	57.1887	3.14149e-06	2.42596e-05	0	0	FALSE	FALSE	FALSE	FALSE	FALSE	FALSE
chr1	7175360	7175522	163	*	mm10_rmsk	exon	745		RLTR26B_MM	RLTR26B_MM_dup3	ERVK	LTR	-2217	RP23-278C19.3	ENSMUST00000029124.7	intergenic	intergenic	intergenic	-1.13101	-1.30723	10.4495	0.00199705	0.0242137	-0.073476	7.84003	4.60543	0.050448	0.0749685	4.71752e-157	1.37392e-156	FALSE	FALSE	FALSE	FALSE	FALSE	FALSE
chr1	7175849	7176187	339	*	mm10_rmsk	exon	620		L1_Mur3	L1_Mur3_dup80	L1	LINE	-1552	RP23-278C19.3	ENSMUST00000029124.7	intergenic	intergenic	intergenic	-1.04706	-0.950388	8.56455	0.00483864	0.0458174	0.334543	12.3059	85.3852	3.12894e-07	5.33454e-06	0	0	FALSE	FALSE	FALSE	FALSE	FALSE	FALSE
chr1	7180042	7180543	502	*	mm10_rmsk	exon	2693		RMER1A	RMER1A_dup2	RMER1A	Other	2303	RP23-278C19.3	ENSMUST00000029124.7	intergenic	intergenic	intergenic	-1.177	-0.78778	16.0078	0.000176128	0.0037402	-0.0317533	11.4648	0.511812	0.486465	0.538965	0	0	FALSE	FALSE	FALSE	FALSE	FALSE	FALSE
chr1	7204834	7204950	117	*	mm10_rmsk	exon	544		MERVL_2A-int	MERVL_2A-int_dup22	ERVL	LTR	14915	Nras-ps2	ENSMUST00000195269.1	intergenic	intergenic	intergenic	-1.52789	-1.61385	14.8051	0.000291979	0.00556529	0.421914	10.1471	113.592	5.60901e-08	3.05101e-06	0	0	TRUE	FALSE	TRUE	FALSE	FALSE	FALSE
chr1	7215083	7215949	867	*	mm10_rmsk	exon	8078		L1_Mus3	L1_Mus3_dup136	L1	LINE	25164	Nras-ps2	ENSMUST00000195269.1	intergenic	intergenic	intergenic	1.75629	-2.20107	10.8734	0.0016446	0.0209503	0.491166	14.0232	104.073	9.55672e-08	3.14529e-06	0	0	FALSE	FALSE	FALSE	FALSE	FALSE	FALSE
chr1	7253275	7253491	217	*	mm10_rmsk	exon	1281		Lx2	Lx2_dup61	L1	LINE	-12312	Gm23274	ENSMUST00000104056.1	intergenic	intergenic	intergenic	-1.87393	-2.40874	10.9323	0.00160099	0.020538	0.329614	12.88	47.1621	9.02254e-06	5.15113e-05	0	0	FALSE	FALSE	FALSE	FALSE	FALSE	FALSE
chr1	7312383	7312639	257	*	mm10_rmsk	exon	2450		ERVB7_2B-LTR_MM	ERVB7_2B-LTR_MM_dup2	ERVK	LTR	-2812	RP23-278C19.1	ENSMUST00000192649.1	intergenic	intergenic	intergenic	-1.2824	-1.41537	11.789	0.00108722	0.0153763	-0.835739	8.79374	51.3472	2.05966e-05	9.52381e-05	0	0	TRUE	FALSE	TRUE	FALSE	FALSE	FALSE
chr1	7319347	7319434	88	*	mm10_rmsk	exon	850		ORR1D2	ORR1D2_dup30	ERVL-MaLR	LTR	3896	RP23-278C19.1	ENSMUST00000192649.1	intergenic	intergenic	intergenic	-1.34032	-0.569563	20.6081	2.77533e-05	0.000870386	-0.192417	11.9933	47.1146	9.07148e-06	5.15279e-05	0	0	TRUE	TRUE	TRUE	FALSE	FALSE	FALSE
chr1	7319435	7319766	332	*	mm10_rmsk	exon	1356		RLTR9A3	RLTR9A3_dup6	ERVK	LTR	3984	RP23-278C19.1	ENSMUST00000192649.1	intergenic	intergenic	intergenic	-1.56177	0.931006	42.4171	1.69998e-08	4.00656e-06	-0.620645	8.47341	76.3687	7.11385e-07	9.04591e-06	0	0	TRUE	TRUE	TRUE	FALSE	FALSE	FALSE
chr1	7364267	7366774	2508	*	mm10_rmsk	exon	24530		L1Md_F2	L1Md_F2_dup184	L1	LINE	-14615	RP24-263A16.1	ENSMUST00000193428.1	intronic	intronic	gene_body	1.00954	-0.973236	10.4529	0.00199394	0.024183	0.519061	15.1429	139.838	1.55383e-08	1.93193e-06	0	0	FALSE	FALSE	FALSE	FALSE	FALSE	FALSE
chr1	7398615	7398742	128	*	mm10_rmsk	exon	289		ID_B1	ID_B1_dup103	B4	SINE	746	RP24-263A16.1	ENSMUST00000193732.1	intergenic	proximal <=1000bp	Tss_prox_1kbp	-1.45926	0.255781	31.5305	5.37293e-07	4.33868e-05	-0.175808	14.6041	23.3246	0.000290382	0.000788684	0	0	FALSE	FALSE	FALSE	TRUE	FALSE	TRUE
chr1	7398639	7398743	105	*	mm10_rmsk	exon	564		B1_Mus1	B1_Mus1_dup128	Alu	SINE	770	RP24-263A16.1	ENSMUST00000193732.1	intergenic	proximal <=1000bp	Tss_prox_1kbp	-1.438	0.0223511	29.8695	9.45689e-07	6.57311e-05	-0.146129	14.2108	8.59991	0.011203	0.0196492	0	0	FALSE	FALSE	FALSE	TRUE	FALSE	TRUE
chr1	7414614	7414737	124	*	mm10_rmsk	exon	521		RSINE1	RSINE1_dup109	B4	SINE	3935	RP24-263A16.2	ENSMUST00000193998.1	intergenic	intergenic	intergenic	-1.80459	-1.56293	18.1723	7.26524e-05	0.00186239	0.0578688	14.2698	3.88326	0.0694883	0.0999452	0	0	FALSE	FALSE	FALSE	FALSE	FALSE	FALSE
chr1	7414953	7415048	96	*	mm10_rmsk	exon	313		PB1D10	PB1D10_dup78	Alu	SINE	4274	RP24-263A16.2	ENSMUST00000193998.1	intergenic	intergenic	intergenic	-1.1158	-1.00721	11.9627	0.00100596	0.0144962	-0.196601	13.5951	25.3633	0.00019904	0.000578507	0	0	TRUE	TRUE	TRUE	FALSE	FALSE	FALSE
chr1	7415248	7415380	133	*	mm10_rmsk	exon	314		B4A	B4A_dup93	B4	SINE	4569	RP24-263A16.2	ENSMUST00000193998.1	intergenic	intergenic	intergenic	-1.11344	-1.24563	9.76834	0.00273811	0.0305384	0.0753296	14.4644	7.74941	0.0149756	0.0252756	0	0	TRUE	FALSE	TRUE	FALSE	FALSE	FALSE
chr1	7420514	7421714	1201	*	mm10_rmsk	exon	5093		RLTR21	RLTR21_dup13	ERVK	LTR	9835	RP24-263A16.2	ENSMUST00000193998.1	intergenic	intergenic	intergenic	1.1678	-1.56609	9.41907	0.00322487	0.0343744	0.346067	9.30964	113.895	5.51853e-08	3.05101e-06	1.3611e-201	4.55044e-201	FALSE	FALSE	FALSE	FALSE	FALSE	FALSE
chr1	7447359	7447891	533	*	mm10_rmsk	exon	3997		Lx6	Lx6_dup53	L1	LINE	36680	RP24-263A16.2	ENSMUST00000193998.1	intergenic	intergenic	intergenic	-2.0646	-1.47146	28.4442	1.55023e-06	9.46663e-05	0.298114	12.3587	77.597	5.49313e-07	7.53997e-06	0	0	TRUE	FALSE	TRUE	FALSE	FALSE	FALSE
chr1	7518523	7519008	486	*	mm10_rmsk	exon	1838		ERVB7_2-LTR_MM	ERVB7_2-LTR_MM_dup2	ERVK	LTR	20555	RP24-181G14.2	ENSMUST00000194886.1	intergenic	intergenic	intergenic	-1.24359	0.575219	24.8859	5.53721e-06	0.000248068	-0.621661	8.013	46.3455	2.01687e-05	9.40363e-05	3.70047e-290	1.62075e-289	TRUE	TRUE	TRUE	FALSE	FALSE	TRUE
chr1	7549236	7549389	154	*	mm10_rmsk	exon	594		B1F	B1F_dup56	Alu	SINE	-42257	RP24-181G14.1	ENSMUST00000195081.1	intergenic	intergenic	intergenic	-2.53409	-2.64226	12.8039	0.000692977	0.0109049	-0.210784	13.2074	26.2569	0.000169765	0.00050658	0	0	FALSE	FALSE	FALSE	FALSE	FALSE	FALSE
chr1	7550135	7550697	563	*	mm10_rmsk	exon	3081		MLTR31A_MM	MLTR31A_MM_dup1	ERVK	LTR	-40949	RP24-181G14.1	ENSMUST00000195081.1	intergenic	intergenic	intergenic	-1.1874	0.508296	23.6942	8.59456e-06	0.000348992	-0.65536	7.65995	55.4631	7.75415e-06	4.56679e-05	1.10675e-211	3.82455e-211	TRUE	FALSE	TRUE	FALSE	FALSE	FALSE
chr1	7550768	7550915	148	*	mm10_rmsk	exon	1193		B1_Mus1	B1_Mus1_dup133	Alu	SINE	-40731	RP24-181G14.1	ENSMUST00000195081.1	intergenic	intergenic	intergenic	-1.26759	-1.59066	10.6636	0.00181005	0.0225065	-0.146129	14.2108	8.59991	0.011203	0.0196492	0	0	FALSE	FALSE	FALSE	FALSE	FALSE	FALSE
chr1	7651128	7651439	312	*	mm10_rmsk	exon	2452		L1Md_F2	L1Md_F2_dup198	L1	LINE	-12642	Rps2-ps2	ENSMUST00000194305.1	intergenic	intergenic	intergenic	-1.41	-1.68581	10.3182	0.00212152	0.0253224	0.519061	15.1429	139.838	1.55383e-08	1.93193e-06	0	0	TRUE	FALSE	TRUE	FALSE	FALSE	FALSE
chr1	7652321	7652678	358	*	mm10_rmsk	exon	2864		RLTR43C	RLTR43C_dup2	ERVK	LTR	-11403	Rps2-ps2	ENSMUST00000194305.1	intergenic	intergenic	intergenic	-1.13111	-1.10339	8.7641	0.00439809	0.0428453	0.225217	5.92023	15.1921	0.00169496	0.00358536	6.15483e-40	1.00071e-39	FALSE	FALSE	FALSE	FALSE	FALSE	FALSE
chr1	7776781	7777679	899	*	mm10_rmsk	exon	4069		RMER17A-int	RMER17A-int_dup3	ERVK	LTR	46216	RP23-408B17.1	ENSMUST00000194872.1	intergenic	intergenic	intergenic	-1.41697	2.12494	30.346	8.03178e-07	5.8316e-05	-0.416976	7.52375	72.3081	8.28274e-07	9.69813e-06	5.22056e-199	1.73507e-198	TRUE	TRUE	TRUE	FALSE	FALSE	FALSE
chr1	7777680	7778038	359	*	mm10_rmsk	exon	2113		RMER17A	RMER17A_dup5	ERVK	LTR	47115	RP23-408B17.1	ENSMUST00000194872.1	intergenic	intergenic	intergenic	-1.25776	0.4249	23.2661	1.00823e-05	0.000394368	0.207716	9.84061	2.87721	0.119699	0.160027	0	0	FALSE	FALSE	FALSE	FALSE	FALSE	FALSE
chr1	7907045	7907448	404	*	mm10_rmsk	exon	1751		RLTR41	RLTR41_dup5	ERV1	LTR	176480	RP23-408B17.1	ENSMUST00000194872.1	intergenic	intergenic	intergenic	-2.04689	-1.20401	31.3412	5.72738e-07	4.54326e-05	-0.261583	9.03222	23.3614	0.000288351	0.000785072	0	0	FALSE	FALSE	FALSE	FALSE	FALSE	FALSE
chr1	7915824	7916379	556	*	mm10_rmsk	exon	2790		RLTR17C_Mm	RLTR17C_Mm_dup1	ERVK	LTR	185259	RP23-408B17.1	ENSMUST00000194872.1	intergenic	intergenic	intergenic	-1.10177	-1.41769	8.86085	0.00419983	0.0414675	0.23616	5.48496	21.3121	0.000431039	0.00108863	2.68591e-20	3.66555e-20	TRUE	FALSE	TRUE	FALSE	FALSE	FALSE
chr1	8017797	8018099	303	*	mm10_rmsk	exon	2653		IAPEY3C_LTR	IAPEY3C_LTR	ERVK	LTR	287232	RP23-408B17.1	ENSMUST00000194872.1	intergenic	intergenic	intergenic	-1.14988	-0.396931	18.1275	7.39733e-05	0.00188868	0.224247	6.82341	30.7612	8.02671e-05	0.000273838	6.51429e-32	9.93407e-32	TRUE	TRUE	TRUE	FALSE	FALSE	FALSE
chr1	8047179	8047602	424	*	mm10_rmsk	exon	3187		RLTR10C	RLTR10C_dup6	ERVK	LTR	316614	RP23-408B17.1	ENSMUST00000194872.1	intergenic	intergenic	intergenic	1.30735	-1.39327	9.83337	0.00265632	0.029868	0.525233	10.783	2.36208	0.156838	0.202191	0	0	TRUE	TRUE	FALSE	FALSE	FALSE	FALSE
chr1	8087918	8088381	464	*	mm10_rmsk	exon	2794		Lx5	Lx5_dup51	L1	LINE	357353	RP23-408B17.1	ENSMUST00000194872.1	intergenic	intergenic	intergenic	-1.99104	-1.98262	16.5264	0.000142062	0.00315872	0.344861	12.7349	51.5136	5.59317e-06	3.66009e-05	0	0	FALSE	FALSE	FALSE	FALSE	FALSE	FALSE
chr1	8122992	8123180	189	*	mm10_rmsk	exon	1355		B2_Mm1t	B2_Mm1t_dup43	B2	SINE	-330311	RP23-241G23.1	ENSMUST00000192338.1	intergenic	intergenic	intergenic	-1.19518	-1.08067	10.6746	0.00180096	0.0224196	0.162653	12.0786	9.5898	0.00812187	0.0146351	0	0	TRUE	TRUE	TRUE	FALSE	FALSE	FALSE
chr1	8163246	8163865	620	*	mm10_rmsk	exon	3571		RMER17A2	RMER17A2_dup6	ERVK	LTR	-289626	RP23-241G23.1	ENSMUST00000192338.1	intergenic	intergenic	intergenic	1.18849	-1.34078	11.0348	0.00152805	0.0198416	-0.0432949	10.7533	0.0935766	0.765807	0.790533	0	0	FALSE	FALSE	FALSE	FALSE	FALSE	FALSE
chr1	8286902	8288207	1306	*	mm10_rmsk	exon	5736		Lx2B	Lx2B_dup6	L1	LINE	-165284	RP23-241G23.1	ENSMUST00000192338.1	intergenic	intergenic	intergenic	-1.14276	-0.844517	14.5928	0.000319567	0.00597666	0.21701	11.4789	26.956	0.000150288	0.000460745	0	0	FALSE	FALSE	FALSE	FALSE	FALSE	FALSE
chr1	8288222	8288861	640	*	mm10_rmsk	exon	4253		RLTR26_Mus	RLTR26_Mus_dup6	ERVK	LTR	-164630	RP23-241G23.1	ENSMUST00000192338.1	intergenic	intergenic	intergenic	-1.352	0.613711	32.4834	3.90406e-07	3.44406e-05	-0.705918	10.4544	54.5069	1.27355e-05	6.45502e-05	0	0	TRUE	FALSE	TRUE	FALSE	FALSE	FALSE
chr1	8382193	8383038	846	*	mm10_rmsk	exon	4385		RMER17A2	RMER17A2_dup7	ERVK	LTR	-70453	RP23-241G23.1	ENSMUST00000192338.1	intronic	intronic	gene_body	1.1226	-0.93686	12.005	0.000987145	0.0142893	-0.0432949	10.7533	0.0935766	0.765807	0.790533	0	0	FALSE	FALSE	FALSE	FALSE	FALSE	TRUE
chr1	8485384	8486034	651	*	mm10_rmsk	exon	1818		RMER15-int	RMER15-int_dup2	ERVL	LTR	14864	Sntg1	ENSMUST00000115484.8	intronic	intronic	gene_body	1.40431	-1.97713	8.90046	0.00412139	0.0409084	0.131834	9.91364	24.1559	0.00024829	0.000691135	0	0	FALSE	FALSE	FALSE	FALSE	FALSE	FALSE
chr1	8487454	8489017	1564	*	mm10_rmsk	exon	4940		RMER15-int	RMER15-int_dup5	ERVL	LTR	16934	Sntg1	ENSMUST00000115484.8	intronic	intronic	gene_body	1.09008	-1.02177	10.2972	0.00214224	0.0255039	0.131834	9.91364	24.1559	0.00024829	0.000691135	0	0	FALSE	FALSE	FALSE	FALSE	FALSE	FALSE
chr1	8489995	8490052	58	*	mm10_rmsk	exon	2114		RMER15	RMER15_dup33	ERVL	LTR	19475	Sntg1	ENSMUST00000115484.8	intronic	intronic	gene_body	-2.11762	-1.08237	32.7291	3.59753e-07	3.24869e-05	-0.386955	12.6786	57.0863	3.17301e-06	2.43192e-05	0	0	TRUE	FALSE	TRUE	FALSE	FALSE	FALSE
chr1	8490053	8490241	189	*	mm10_rmsk	exon	1577		B2_Mm1t	B2_Mm1t_dup44	B2	SINE	19533	Sntg1	ENSMUST00000115484.8	intronic	intronic	gene_body	-1.62382	-1.30695	18.0173	7.73335e-05	0.00195605	0.162653	12.0786	9.5898	0.00812187	0.0146351	0	0	TRUE	FALSE	TRUE	FALSE	FALSE	FALSE
chr1	8775311	8776083	773	*	mm10_rmsk	exon	5834		RLTR13C2	RLTR13C2_dup7	ERVK	LTR	-16079	AC163389.1	ENSMUST00000119877.1	intronic	intronic	gene_body	1.20365	-1.6002	9.52034	0.00307505	0.033226	0.264904	8.47681	72.2518	8.32012e-07	9.69813e-06	4.53821e-162	1.36026e-161	FALSE	FALSE	FALSE	FALSE	FALSE	FALSE
chr1	8786684	8787019	336	*	mm10_rmsk	exon	2763		IAPLTR2b	IAPLTR2b_dup12	ERVK	LTR	-5143	AC163389.1	ENSMUST00000119877.1	intronic	intronic	gene_body	1.72723	-2.26437	10.8154	0.0016887	0.0213679	0.135021	8.21256	3.4278	0.0867184	0.121297	7.8988e-96	1.81785e-95	FALSE	FALSE	FALSE	FALSE	FALSE	FALSE
chr1	8789168	8790002	835	*	mm10_rmsk	exon	6105		IAPEz-int	IAPEz-int_dup39	ERVK	LTR	-2160	AC163389.1	ENSMUST00000119877.1	intronic	intronic	gene_body	1.09613	-1.57223	8.75278	0.00442192	0.0430062	0.735264	12.6535	101.014	2.6591e-07	5.12027e-06	0	0	FALSE	FALSE	FALSE	FALSE	FALSE	FALSE
chr1	8805583	8805757	175	*	mm10_rmsk	exon	604		B4A	B4A_dup106	B4	SINE	1640	Sntg1	ENSMUST00000115488.2	intronic	intronic	gene_body	-1.08348	1.28432	19.8881	3.67531e-05	0.00108394	0.0753296	14.4644	7.74941	0.0149756	0.0252756	0	0	TRUE	TRUE	TRUE	FALSE	FALSE	FALSE
chr1	8859295	8859798	504	*	mm10_rmsk	exon	3583		RLTR44C	RLTR44C	ERVK	LTR	2532	RP23-200C17.1	ENSMUST00000192115.1	intronic	intronic	gene_body	-1.07517	2.01665	17.809	8.41193e-05	0.00209023	-0.880711	9.53061	15.1351	0.00298747	0.00595897	0	0	TRUE	TRUE	TRUE	FALSE	FALSE	TRUE
chr1	8859799	8860288	490	*	mm10_rmsk	exon	2403		RLTR26B_MM	RLTR26B_MM_dup5	ERVK	LTR	3036	RP23-200C17.1	ENSMUST00000192115.1	intronic	intronic	gene_body	-1.04679	0.313664	15.7777	0.000193863	0.00403424	-0.073476	7.84003	4.60543	0.050448	0.0749685	4.71752e-157	1.37392e-156	TRUE	FALSE	TRUE	FALSE	FALSE	TRUE
chr1	8898101	8900404	2304	*	mm10_rmsk	exon	15701		L1_Mus3	L1_Mus3_dup212	L1	LINE	41338	RP23-200C17.1	ENSMUST00000192115.1	intronic	intronic	gene_body	1.49154	-1.47156	14.7138	0.000303527	0.0057376	0.491166	14.0232	104.073	9.55672e-08	3.14529e-06	0	0	FALSE	FALSE	FALSE	FALSE	FALSE	FALSE
chr1	8900403	8900977	575	*	mm10_rmsk	exon	7525		L1_Mus3	L1_Mus3_dup213	L1	LINE	43640	RP23-200C17.1	ENSMUST00000192115.1	intronic	intronic	gene_body	1.46298	-2.14191	8.81436	0.0042939	0.0421168	0.491166	14.0232	104.073	9.55672e-08	3.14529e-06	0	0	FALSE	FALSE	FALSE	FALSE	FALSE	FALSE
chr1	8936520	8937252	733	*	mm10_rmsk	exon	11363		MMERVK9C_I-int	MMERVK9C_I-int_dup4	ERVK	LTR	-15170	Sntg1	ENSMUST00000194098.1	intronic	intronic	gene_body	-1.1555	0.701389	23.1272	1.06205e-05	0.000410884	-0.179867	10.0272	8.76041	0.0107656	0.0189413	0	0	TRUE	FALSE	TRUE	FALSE	FALSE	FALSE
chr1	8975603	8976270	668	*	mm10_rmsk	exon	1448		Lx8	Lx8_dup127	L1	LINE	11982	AC122738.1	ENSMUST00000085919.2	intronic	intronic	gene_body	2.04795	-2.23625	13.3657	0.000542004	0.0090233	0.121817	13.7403	15.9377	0.00141182	0.00306763	0	0	FALSE	FALSE	FALSE	FALSE	FALSE	FALSE
chr1	8976337	8977164	828	*	mm10_rmsk	exon	4626		Lx2A	Lx2A_dup2	L1	LINE	12716	AC122738.1	ENSMUST00000085919.2	intronic	intronic	gene_body	1.21343	-1.67942	9.94365	0.0025234	0.0287686	0.103093	9.41107	5.91086	0.029537	0.0464865	0	0	FALSE	FALSE	FALSE	FALSE	FALSE	FALSE
chr1	9000737	9003187	2451	*	mm10_rmsk	exon	23215		L1_Mus3	L1_Mus3_dup220	L1	LINE	37116	AC122738.1	ENSMUST00000085919.2	intronic	intronic	gene_body	1.35153	-1.49674	12.8064	0.000692203	0.0108953	0.491166	14.0232	104.073	9.55672e-08	3.14529e-06	0	0	FALSE	FALSE	FALSE	FALSE	FALSE	FALSE
chr1	9053784	9054202	419	*	mm10_rmsk	exon	1709		RMER17C	RMER17C_dup17	ERVK	LTR	90163	AC122738.1	ENSMUST00000085919.2	intronic	intronic	gene_body	1.44842	-2.07376	8.53743	0.004902	0.0462321	-0.174785	11.5718	3.94549	0.0712389	0.1022	0	0	FALSE	FALSE	FALSE	FALSE	TRUE	FALSE
chr1	9224340	9224987	648	*	mm10_rmsk	exon	1895		L1_Mur3	L1_Mur3_dup118	L1	LINE	32224	RP23-331M15.1	ENSMUST00000193635.1	intronic	intronic	gene_body	-1.40821	1.15781	26.7929	2.77881e-06	0.00014649	0.334543	12.3059	85.3852	3.12894e-07	5.33454e-06	0	0	TRUE	TRUE	TRUE	FALSE	FALSE	FALSE
chr1	9246146	9247141	996	*	mm10_rmsk	exon	8498		L1Md_T	L1Md_T_dup81	L1	LINE	-11993	RP23-331M15.2	ENSMUST00000195333.1	intronic	intronic	gene_body	1.02717	-1.46982	8.47793	0.00504406	0.0471523	0.582381	14.4509	129.235	2.53579e-08	2.36462e-06	0	0	FALSE	TRUE	FALSE	FALSE	FALSE	FALSE
chr1	9302766	9303299	534	*	mm10_rmsk	exon	1536		RMER15	RMER15_dup36	ERVL	LTR	2888	Sntg1	ENSMUST00000140302.7	intergenic	intergenic	intergenic	1.43494	-2.25877	8.381	0.00528482	0.0487228	-0.386955	12.6786	57.0863	3.17301e-06	2.43192e-05	0	0	FALSE	FALSE	FALSE	FALSE	TRUE	FALSE
chr1	9306567	9307170	604	*	mm10_rmsk	exon	5117		L1_Mus1	L1_Mus1_dup132	L1	LINE	6689	Sntg1	ENSMUST00000140302.7	intergenic	intergenic	intergenic	1.48397	-2.06395	9.18764	0.00359665	0.0371472	0.568501	13.4728	115.916	4.95501e-08	3.05101e-06	0	0	FALSE	FALSE	FALSE	FALSE	FALSE	FALSE
chr1	9315621	9316692	1072	*	mm10_rmsk	exon	4087		ORR1C2-int	ORR1C2-int_dup4	ERVL-MaLR	LTR	15743	Sntg1	ENSMUST00000140302.7	intergenic	intergenic	intergenic	1.28898	-1.65382	11.4751	0.00125193	0.0170992	0.160617	8.27819	35.2855	4.07927e-05	0.000154736	3.06939e-161	9.10343e-161	FALSE	FALSE	FALSE	FALSE	FALSE	FALSE
chr1	9325220	9326776	1557	*	mm10_rmsk	exon	7611		Lx2	Lx2_dup86	L1	LINE	25342	Sntg1	ENSMUST00000140302.7	intergenic	intergenic	intergenic	1.40097	-1.33352	16.1577	0.000165486	0.00356064	0.329614	12.88	47.1621	9.02254e-06	5.15113e-05	0	0	FALSE	FALSE	FALSE	FALSE	FALSE	FALSE
chr1	9332630	9333800	1171	*	mm10_rmsk	exon	21879		L1VL4	L1VL4_dup39	L1	LINE	32752	Sntg1	ENSMUST00000140302.7	intergenic	intergenic	intergenic	1.87639	-1.86651	18.453	6.49094e-05	0.0017023	0.46762	11.3684	120.293	3.9467e-08	2.94424e-06	0	0	FALSE	FALSE	FALSE	FALSE	FALSE	FALSE
chr1	9381807	9382320	514	*	mm10_rmsk	exon	2983		RLTR11A	RLTR11A_dup5	ERVK	LTR	-16367	RP23-411P10.5	ENSMUST00000040649.6	intergenic	intergenic	intergenic	1.77692	-2.19471	12.1682	0.000917897	0.0135172	-0.00505774	9.67275	0.0322877	0.860049	0.875701	0	0	FALSE	FALSE	FALSE	FALSE	TRUE	FALSE
chr1	9468583	9469052	470	*	mm10_rmsk	exon	4637		Lx3B	Lx3B_dup21	L1	LINE	9913	Gm24765	ENSMUST00000083691.1	intergenic	intergenic	intergenic	-1.08809	-0.447596	12.9129	0.000660579	0.0105182	0.468767	11.1896	65.9446	1.40651e-06	1.32259e-05	0	0	TRUE	FALSE	TRUE	FALSE	FALSE	FALSE
chr1	9469179	9469361	183	*	mm10_rmsk	exon	954		MTC-int	MTC-int_dup15	ERVL-MaLR	LTR	10509	Gm24765	ENSMUST00000083691.1	intergenic	intergenic	intergenic	-1.20988	-0.671207	15.4116	0.000225994	0.00455145	0.213145	9.93231	50.9754	5.92324e-06	3.83128e-05	0	0	TRUE	FALSE	TRUE	FALSE	FALSE	FALSE
chr1	9470383	9470670	288	*	mm10_rmsk	exon	1632		MTC	MTC_dup85	ERVL-MaLR	LTR	11713	Gm24765	ENSMUST00000083691.1	intergenic	intergenic	intergenic	-1.0729	-0.690905	12.9042	0.000663119	0.010549	-0.0712501	12.9646	7.63021	0.0156148	0.0261341	0	0	FALSE	FALSE	FALSE	FALSE	FALSE	FALSE
chr1	9516697	9516989	293	*	mm10_rmsk	exon	1437		L1_Mur3	L1_Mur3_dup128	L1	LINE	15175	RP24-361E12.1	ENSMUST00000192792.1	intergenic	intergenic	intergenic	-1.85942	-1.19119	23.4377	9.4563e-06	0.000375273	0.334543	12.3059	85.3852	3.12894e-07	5.33454e-06	0	0	TRUE	FALSE	TRUE	FALSE	FALSE	FALSE
chr1	9570876	9571016	141	*	mm10_rmsk	exon	1157		B1_Mm	B1_Mm_dup85	Alu	SINE	-3532	AC103620.1	ENSMUST00000121942.1	intronic	intronic	gene_body	-1.23	-0.222452	19.3095	4.61597e-05	0.00129849	-0.134862	12.9233	6.73414	0.0215837	0.0353101	0	0	TRUE	TRUE	TRUE	FALSE	FALSE	FALSE
chr1	9573124	9573302	179	*	mm10_rmsk	exon	669		ID_B1	ID_B1_dup122	B4	SINE	-1246	AC103620.1	ENSMUST00000121942.1	intronic	intronic	gene_body	-1.41745	-1.64707	11.2574	0.00138127	0.0184068	-0.175808	14.6041	23.3246	0.000290382	0.000788684	0	0	FALSE	FALSE	FALSE	FALSE	FALSE	FALSE
chr1	9649739	9649823	85	*	mm10_rmsk	exon	327		B1F	B1F_dup63	Alu	SINE	9157	RP24-219C22.3	ENSMUST00000191209.1	intergenic	intergenic	intergenic	-1.4077	-1.47046	14.6193	0.000315979	0.00592367	-0.210784	13.2074	26.2569	0.000169765	0.00050658	0	0	FALSE	FALSE	FALSE	FALSE	FALSE	FALSE
chr1	9655302	9655565	264	*	mm10_rmsk	exon	807		Lx7	Lx7_dup179	L1	LINE	14720	RP24-219C22.3	ENSMUST00000191209.1	intergenic	intergenic	intergenic	2.07997	-2.68406	8.85518	0.0042112	0.041541	0.295529	13.1367	105.492	8.80305e-08	3.05101e-06	0	0	FALSE	FALSE	FALSE	FALSE	FALSE	FALSE
chr1	9702889	9702968	80	*	mm10_rmsk	exon	300		PB1D10	PB1D10_dup96	Alu	SINE	2680	Mybl1	ENSMUST00000088658.10	intergenic	intergenic	intergenic	-1.05743	0.315124	16.848	0.000124446	0.00284412	-0.196601	13.5951	25.3633	0.00019904	0.000578507	0	0	TRUE	FALSE	TRUE	FALSE	FALSE	FALSE
chr1	9716633	9716780	148	*	mm10_rmsk	exon	1227		B1_Mus2	B1_Mus2_dup128	Alu	SINE	16424	Mybl1	ENSMUST00000088658.10	intergenic	intergenic	intergenic	-1.01521	-0.21695	14.8661	0.000284521	0.0054522	-0.176162	13.8323	10.0652	0.00699884	0.0128811	0	0	TRUE	FALSE	TRUE	FALSE	FALSE	FALSE
chr1	9716838	9716857	20	*	mm10_rmsk	exon	393		CYRA11_Mm	CYRA11_Mm_dup1	Y-chromosome	Unknown	16629	Mybl1	ENSMUST00000088658.10	intergenic	intergenic	intergenic	-1.09915	-0.4852	15.0491	0.0002633	0.00513313	0.1637	7.95138	9.89717	0.00737388	0.0135268	6.26607e-160	1.84392e-159	FALSE	FALSE	FALSE	FALSE	FALSE	TRUE
chr1	9716858	9716984	127	*	mm10_rmsk	exon	835		URR1B	URR1B_dup31	hAT-Charlie	DNA	16649	Mybl1	ENSMUST00000088658.10	intergenic	intergenic	intergenic	-1.11091	-0.0537731	17.6636	8.92235e-05	0.0021904	0.0113244	11.7009	0.167068	0.689098	0.720655	0	0	TRUE	FALSE	TRUE	FALSE	FALSE	TRUE
chr1	9716995	9717183	189	*	mm10_rmsk	exon	791		ID_B1	ID_B1_dup133	B4	SINE	16786	Mybl1	ENSMUST00000088658.10	intergenic	intergenic	intergenic	-1.16856	0.59529	19.498	4.28478e-05	0.00122409	-0.175808	14.6041	23.3246	0.000290382	0.000788684	0	0	TRUE	TRUE	TRUE	FALSE	FALSE	TRUE
chr1	9768404	9768597	194	*	mm10_rmsk	exon	984		ORR1D1	ORR1D1_dup55	ERVL-MaLR	LTR	-15181	RP23-228O9.1	ENSMUST00000189322.1	intronic	intronic	gene_body	-1.29061	1.68558	28.9363	1.30573e-06	8.3357e-05	0.0522614	12.1868	4.48196	0.0532154	0.0784558	0	0	TRUE	TRUE	TRUE	TRUE	FALSE	TRUE
chr1	9768600	9768772	173	*	mm10_rmsk	exon	956		RLTR26	RLTR26_dup2	ERVK	LTR	-15006	RP23-228O9.1	ENSMUST00000189322.1	intronic	intronic	gene_body	-1.28196	1.57039	28.1224	1.73535e-06	0.000102868	-0.552908	8.27558	59.7488	2.8272e-06	2.24371e-05	9.78133e-234	3.6599e-233	TRUE	TRUE	TRUE	TRUE	FALSE	TRUE
chr1	9769662	9770066	405	*	mm10_rmsk	exon	841		RMER4B	RMER4B_dup17	ERVK	LTR	-13712	RP23-228O9.1	ENSMUST00000189322.1	intronic	intronic	gene_body	-1.00361	0.225789	14.9522	0.000274326	0.00529944	-0.0488324	10.4274	1.90913	0.189351	0.238339	0	0	TRUE	FALSE	TRUE	FALSE	FALSE	TRUE
chr1	9770067	9770141	75	*	mm10_rmsk	exon	271		PB1D10	PB1D10_dup102	Alu	SINE	-13637	RP23-228O9.1	ENSMUST00000189322.1	intronic	intronic	gene_body	-1.36805	-1.1021	15.3837	0.000228663	0.00459386	-0.196601	13.5951	25.3633	0.00019904	0.000578507	0	0	FALSE	FALSE	FALSE	FALSE	FALSE	FALSE
chr1	9784837	9785273	437	*	mm10_rmsk	exon	1915		Lx6	Lx6_dup101	L1	LINE	1059	RP23-228O9.1	ENSMUST00000189322.1	intronic	intronic	gene_body	-1.07523	-0.313095	15.4833	0.00021929	0.00444566	0.298114	12.3587	77.597	5.49313e-07	7.53997e-06	0	0	TRUE	FALSE	TRUE	FALSE	FALSE	FALSE
chr1	9787471	9787586	116	*	mm10_rmsk	exon	355		PB1D10	PB1D10_dup106	Alu	SINE	3693	RP23-228O9.1	ENSMUST00000189322.1	intronic	intronic	gene_body	-1.28908	-0.818378	16.3283	0.00015419	0.00336721	-0.196601	13.5951	25.3633	0.00019904	0.000578507	0	0	FALSE	FALSE	FALSE	FALSE	FALSE	FALSE
chr1	9800099	9800142	44	*	mm10_rmsk	exon	222		L2a	L2a_dup22	L2	LINE	1891	Sgk3	ENSMUST00000188298.6	intronic	intronic	gene_body	-1.93073	-2.27928	11.8463	0.00105968	0.0150843	-0.0983674	12.4255	17.964	0.000880133	0.00202232	0	0	FALSE	FALSE	FALSE	FALSE	FALSE	FALSE
chr1	9807708	9807821	114	*	mm10_rmsk	exon	474		B1_Mur4	B1_Mur4_dup49	Alu	SINE	5155	RP23-228O9.3	ENSMUST00000063059.4	intronic	intronic	gene_body	-1.58702	-1.25437	18.9092	5.41036e-05	0.00147326	-0.197949	13.0761	16.1554	0.00133973	0.00293351	0	0	FALSE	FALSE	FALSE	FALSE	FALSE	FALSE
chr1	9814665	9814777	113	*	mm10_rmsk	exon	651		B1_Mus1	B1_Mus1_dup199	Alu	SINE	12112	RP23-228O9.3	ENSMUST00000063059.4	intronic	intronic	gene_body	-1.50434	-0.897534	21.4642	1.99477e-05	0.000669932	-0.146129	14.2108	8.59991	0.011203	0.0196492	0	0	TRUE	TRUE	TRUE	FALSE	FALSE	FALSE
chr1	9825427	9825636	210	*	mm10_rmsk	exon	558		B4	B4_dup86	B4	SINE	-8966	Gm22607	ENSMUST00000158291.1	intronic	intronic	gene_body	-1.01458	-1.07709	9.61372	0.00294335	0.0321881	0.0559679	13.6316	3.88846	0.0693232	0.0998362	0	0	FALSE	FALSE	FALSE	FALSE	FALSE	FALSE
chr1	9845388	9845524	137	*	mm10_rmsk	exon	997		B1_Mus2	B1_Mus2_dup140	Alu	SINE	-2748	Sgk3	ENSMUST00000171265.7	intronic	intronic	gene_body	1.53381	-2.17272	10.1518	0.00229107	0.0268133	-0.176162	13.8323	10.0652	0.00699884	0.0128811	0	0	FALSE	FALSE	FALSE	FALSE	FALSE	FALSE
chr1	9847607	9847698	92	*	mm10_rmsk	exon	273		ID_B1	ID_B1_dup142	B4	SINE	-574	Sgk3	ENSMUST00000171265.7	intronic	proximal <=1000bp	Tss_prox_1kbp	-1.11955	0.647901	21.9067	1.68436e-05	0.000587112	-0.175808	14.6041	23.3246	0.000290382	0.000788684	0	0	FALSE	FALSE	FALSE	FALSE	FALSE	FALSE
chr1	9895821	9896036	216	*	mm10_rmsk	exon	623		L1_Mur3	L1_Mur3_dup133	L1	LINE	394	Sgk3	ENSMUST00000188486.1	exonic	proximal <=1000bp	Tss_prox_1kbp	-1.62186	-2.12797	9.63387	0.00291572	0.0319725	0.334543	12.3059	85.3852	3.12894e-07	5.33454e-06	0	0	FALSE	FALSE	FALSE	FALSE	FALSE	FALSE
chr1	9904115	9904422	308	*	mm10_rmsk	exon	941		ORR1E	ORR1E_dup46	ERVL-MaLR	LTR	-4216	Mcmdc2	ENSMUST00000052843.11	intergenic	intergenic	intergenic	-1.01391	-0.39751	13.2898	0.000560217	0.00925586	-0.325711	12.9387	82.3757	3.86776e-07	6.01114e-06	0	0	FALSE	FALSE	FALSE	FALSE	FALSE	FALSE
chr1	9905064	9905219	156	*	mm10_rmsk	exon	516		B3	B3_dup235	B2	SINE	-3419	Mcmdc2	ENSMUST00000052843.11	intergenic	intergenic	intergenic	-1.55063	-1.54132	17.0474	0.000114681	0.00266725	-0.0408682	15.0047	1.97967	0.18188	0.229711	0	0	FALSE	FALSE	FALSE	FALSE	FALSE	FALSE
chr1	9908944	9909062	119	*	mm10_rmsk	exon	443		B1_Mus1	B1_Mus1_dup204	Alu	SINE	274	Mcmdc2	ENSMUST00000140948.8	intronic	proximal <=1000bp	Tss_prox_1kbp	-1.47603	1.28594	35.7271	1.35099e-07	1.62577e-05	-0.146129	14.2108	8.59991	0.011203	0.0196492	0	0	FALSE	FALSE	FALSE	TRUE	FALSE	TRUE
chr1	9909254	9909329	76	*	mm10_rmsk	exon	417		B1F1	B1F1_dup29	Alu	SINE	584	Mcmdc2	ENSMUST00000140948.8	intronic	proximal <=1000bp	Tss_prox_1kbp	-1.35647	1.65873	26.6616	2.91235e-06	0.000152011	-0.20613	12.0803	22.9816	0.000310097	0.000836142	0	0	TRUE	TRUE	TRUE	TRUE	FALSE	FALSE
chr1	9909355	9909456	102	*	mm10_rmsk	exon	417		B1F1	B1F1_dup30	Alu	SINE	685	Mcmdc2	ENSMUST00000140948.8	intronic	proximal <=1000bp	Tss_prox_1kbp	-1.38459	1.4198	34.2594	2.17313e-07	2.27125e-05	-0.20613	12.0803	22.9816	0.000310097	0.000836142	0	0	TRUE	TRUE	TRUE	TRUE	FALSE	TRUE
chr1	9923629	9923750	122	*	mm10_rmsk	exon	616		B1_Mur4	B1_Mur4_dup55	Alu	SINE	-8370	Mcmdc2	ENSMUST00000183059.1	intronic	intronic	gene_body	-1.007	-1.23575	8.51086	0.00496492	0.0466422	-0.197949	13.0761	16.1554	0.00133973	0.00293351	0	0	TRUE	TRUE	TRUE	FALSE	FALSE	FALSE
chr1	9944441	9944648	208	*	mm10_rmsk	exon	827		B3	B3_dup239	B2	SINE	323	Snhg6	ENSMUST00000182580.7	intergenic	proximal <=1000bp	Tss_prox_1kbp	-1.14415	1.20713	23.467	9.35347e-06	0.000372086	-0.0408682	15.0047	1.97967	0.18188	0.229711	0	0	FALSE	FALSE	FALSE	TRUE	FALSE	TRUE
chr1	9945782	9946506	725	*	mm10_rmsk	exon	3855		RMER6A	RMER6A_dup7	ERVK	LTR	1664	Snhg6	ENSMUST00000182580.7	intergenic	intergenic	intergenic	1.55201	-1.52442	14.5918	0.000319701	0.00597864	0.02397	10.6543	0.948996	0.346995	0.399885	0	0	FALSE	FALSE	FALSE	FALSE	FALSE	FALSE
chr1	9946949	9947124	176	*	mm10_rmsk	exon	1281		B2_Mm1t	B2_Mm1t_dup65	B2	SINE	2831	Snhg6	ENSMUST00000182580.7	intergenic	intergenic	intergenic	2.31355	-2.53438	12.9198	0.000658577	0.0104923	0.162653	12.0786	9.5898	0.00812187	0.0146351	0	0	FALSE	FALSE	FALSE	FALSE	FALSE	FALSE
chr1	9949062	9949403	342	*	mm10_rmsk	exon	2162		MERV1_LTR	MERV1_LTR_dup4	ERV1	LTR	4944	Snhg6	ENSMUST00000182580.7	intergenic	intergenic	intergenic	1.33491	-1.57105	9.72208	0.0027979	0.0310148	0.327008	7.2186	22.2039	0.000382746	0.000990399	2.40985e-103	5.75714e-103	FALSE	FALSE	FALSE	FALSE	FALSE	FALSE
chr1	9983617	9984011	395	*	mm10_rmsk	exon	3567		MTA_Mm	MTA_Mm_dup69	ERVL-MaLR	LTR	1230	AC102570.3	ENSMUST00000134692.1	intronic	intronic	gene_body	-1.49107	-0.568229	25.4781	4.46177e-06	0.000210624	0.182177	12.2533	25.2866	0.000201809	0.000582022	0	0	TRUE	FALSE	TRUE	FALSE	FALSE	FALSE
chr1	9999616	9999755	140	*	mm10_rmsk	exon	413		B4	B4_dup89	B4	SINE	-3698	Ppp1r42	ENSMUST00000124874.7	intronic	intronic	gene_body	-1.16254	-1.59125	8.65702	0.004629	0.0443956	0.0559679	13.6316	3.88846	0.0693232	0.0998362	0	0	FALSE	FALSE	FALSE	FALSE	FALSE	FALSE
chr1	10005229	10005344	116	*	mm10_rmsk	exon	417		PB1	PB1_dup23	Alu	SINE	1776	Ppp1r42	ENSMUST00000124874.7	intronic	intronic	gene_body	1.77747	-2.56629	8.34664	0.00537304	0.049284	-0.205657	11.1561	26.6413	0.000158719	0.000477294	0	0	FALSE	FALSE	FALSE	FALSE	FALSE	FALSE
chr1	10009596	10009722	127	*	mm10_rmsk	exon	517		B1_Mur4	B1_Mur4_dup58	Alu	SINE	-195	Gm24674	ENSMUST00000179194.1	intergenic	proximal <=1000bp	Tss_prox_1kbp	-1.43421	-0.656184	22.9898	1.11823e-05	0.000427599	-0.197949	13.0761	16.1554	0.00133973	0.00293351	0	0	FALSE	FALSE	FALSE	FALSE	FALSE	TRUE
chr1	10014479	10014606	128	*	mm10_rmsk	exon	243		L2c	L2c_dup13	L2	LINE	4562	Gm24674	ENSMUST00000179194.1	intergenic	intergenic	intergenic	-1.61452	-1.32658	18.5761	6.179e-05	0.00163598	-0.103946	11.2892	15.3661	0.00162344	0.00345367	0	0	TRUE	FALSE	TRUE	FALSE	FALSE	FALSE
chr1	10014995	10015056	62	*	mm10_rmsk	exon	301		ID4	ID4_dup50	ID	SINE	5078	Gm24674	ENSMUST00000179194.1	intergenic	intergenic	intergenic	-1.91227	-2.56886	9.06196	0.00381711	0.038764	-0.164001	11.9037	24.9939	0.000212806	0.000611037	0	0	FALSE	FALSE	FALSE	FALSE	FALSE	FALSE
chr1	10016522	10016637	116	*	mm10_rmsk	exon	387		ID_B1	ID_B1_dup157	B4	SINE	6605	Gm24674	ENSMUST00000179194.1	intergenic	intergenic	intergenic	-1.68578	-0.557961	31.5099	5.41048e-07	4.36042e-05	-0.175808	14.6041	23.3246	0.000290382	0.000788684	0	0	FALSE	FALSE	FALSE	FALSE	FALSE	FALSE
chr1	10016638	10016782	145	*	mm10_rmsk	exon	1304		B1_Mm	B1_Mm_dup100	Alu	SINE	6721	Gm24674	ENSMUST00000179194.1	intergenic	intergenic	intergenic	-1.37205	-0.747575	21.8463	1.72361e-05	0.000598039	-0.134862	12.9233	6.73414	0.0215837	0.0353101	0	0	FALSE	FALSE	FALSE	FALSE	FALSE	FALSE
chr1	10039172	10039207	36	*	mm10_rmsk	exon	214		PB1D7	PB1D7_dup35	Alu	SINE	-560	Cspp1	ENSMUST00000191521.6	exonic	proximal <=1000bp	Tss_prox_1kbp	-1.01441	1.64478	18.3264	6.82897e-05	0.00177293	-0.319159	12.459	36.3072	3.53263e-05	0.000141179	0	0	TRUE	TRUE	TRUE	TRUE	FALSE	TRUE
chr1	10039220	10039296	77	*	mm10_rmsk	exon	275		ID_B1	ID_B1_dup161	B4	SINE	-471	Cspp1	ENSMUST00000191521.6	exonic	proximal <=1000bp	Tss_prox_1kbp	-1.09981	2.0695	22.1107	1.55855e-05	0.00055291	-0.175808	14.6041	23.3246	0.000290382	0.000788684	0	0	TRUE	TRUE	TRUE	TRUE	FALSE	TRUE
chr1	10048035	10048312	278	*	mm10_rmsk	exon	1082		B4	B4_dup95	B4	SINE	1542	Cspp1	ENSMUST00000186294.6	intronic	intronic	gene_body	1.57854	-1.94816	12.7534	0.000708538	0.011092	0.0559679	13.6316	3.88846	0.0693232	0.0998362	0	0	FALSE	FALSE	FALSE	FALSE	FALSE	FALSE
chr1	10049343	10049550	208	*	mm10_rmsk	exon	3291		RLTR10C	RLTR10C_dup9	ERVK	LTR	2850	Cspp1	ENSMUST00000186294.6	intronic	intronic	gene_body	-1.00798	-0.202867	14.8549	0.000285869	0.00547312	0.525233	10.783	2.36208	0.156838	0.202191	0	0	TRUE	TRUE	TRUE	FALSE	FALSE	FALSE
chr1	10049594	10049777	184	*	mm10_rmsk	exon	3291		RLTR10C	RLTR10C_dup10	ERVK	LTR	3101	Cspp1	ENSMUST00000186294.6	intronic	intronic	gene_body	-1.04514	-0.336881	13.9783	0.000415758	0.00734531	0.525233	10.783	2.36208	0.156838	0.202191	0	0	TRUE	TRUE	TRUE	FALSE	FALSE	FALSE
chr1	10062196	10062311	116	*	mm10_rmsk	exon	410		PB1D7	PB1D7_dup36	Alu	SINE	4252	RP23-228G18.5	ENSMUST00000194474.1	intronic	intronic	gene_body	-1.02286	0.233659	15.8039	0.000191754	0.00400134	-0.319159	12.459	36.3072	3.53263e-05	0.000141179	0	0	TRUE	FALSE	TRUE	FALSE	FALSE	FALSE
chr1	10095003	10095221	219	*	mm10_rmsk	exon	407		L1_Mur3	L1_Mur3_dup141	L1	LINE	-643	Cspp1	ENSMUST00000185422.1	intronic	proximal <=1000bp	Tss_prox_1kbp	-2.13247	-1.17138	31.0833	6.24943e-07	4.85028e-05	0.334543	12.3059	85.3852	3.12894e-07	5.33454e-06	0	0	TRUE	FALSE	TRUE	FALSE	FALSE	FALSE
chr1	10164316	10164653	338	*	mm10_rmsk	exon	1153		MTD	MTD_dup137	ERVL-MaLR	LTR	-1886	Gm26348	ENSMUST00000157528.1	intronic	intronic	gene_body	-1.41758	-0.481565	26.4604	3.13002e-06	0.000160365	-0.128328	13.8494	24.9898	0.000212962	0.000611037	0	0	TRUE	TRUE	TRUE	FALSE	FALSE	FALSE
chr1	10186429	10186534	106	*	mm10_rmsk	exon	304		RLTR42-int	RLTR42-int_dup10	ERVK	LTR	-12268	RP24-327F2.1	ENSMUST00000192111.1	intronic	intronic	gene_body	-2.65838	-2.75214	10.6587	0.00181417	0.0225434	-0.0993912	9.24754	16.6974	0.00117789	0.0026152	0	0	FALSE	FALSE	FALSE	FALSE	FALSE	FALSE
chr1	10186537	10186619	83	*	mm10_rmsk	exon	211		B4A	B4A_dup152	B4	SINE	-12183	RP24-327F2.1	ENSMUST00000192111.1	intronic	intronic	gene_body	-2.61121	-2.63722	12.673	0.000734061	0.0114003	0.0753296	14.4644	7.74941	0.0149756	0.0252756	0	0	FALSE	FALSE	FALSE	FALSE	FALSE	FALSE
chr1	10191771	10192260	490	*	mm10_rmsk	exon	2207		RLTR11A	RLTR11A_dup8	ERVK	LTR	-6542	RP24-327F2.1	ENSMUST00000192111.1	intronic	intronic	gene_body	-1.07389	-0.676575	12.2149	0.000899052	0.0133074	-0.00505774	9.67275	0.0322877	0.860049	0.875701	0	0	TRUE	FALSE	TRUE	FALSE	FALSE	FALSE
chr1	10201898	10202097	200	*	mm10_rmsk	exon	1014		URR1A	URR1A_dup25	hAT-Charlie	DNA	3096	RP24-327F2.1	ENSMUST00000192111.1	intronic	intronic	gene_body	-1.09459	-1.28688	9.63999	0.00290737	0.0319002	0.141989	11.6467	21.3016	0.00043195	0.00108863	0	0	TRUE	FALSE	TRUE	FALSE	FALSE	FALSE
chr1	10219058	10219230	173	*	mm10_rmsk	exon	703		B3	B3_dup253	B2	SINE	4845	Arfgef1	ENSMUST00000186720.1	intronic	intronic	gene_body	-1.37601	-1.54729	10.9402	0.00159528	0.0204816	-0.0408682	15.0047	1.97967	0.18188	0.229711	0	0	FALSE	FALSE	FALSE	FALSE	FALSE	FALSE
chr1	10256643	10256721	79	*	mm10_rmsk	exon	539		MLT1D	MLT1D_dup11	ERVL-MaLR	LTR	23973	Arfgef1	ENSMUST00000088615.10	intergenic	intergenic	intergenic	-1.58425	-2.31644	8.85061	0.00422037	0.0416032	0.019482	10.8455	0.379935	0.547824	0.597481	0	0	FALSE	FALSE	FALSE	FALSE	FALSE	FALSE
chr1	10258781	10259493	713	*	mm10_rmsk	exon	1166		L1_Mur3	L1_Mur3_dup142	L1	LINE	26111	Arfgef1	ENSMUST00000088615.10	intergenic	intergenic	intergenic	-1.32559	0.457602	27.9787	1.82521e-06	0.00010683	0.334543	12.3059	85.3852	3.12894e-07	5.33454e-06	0	0	TRUE	FALSE	TRUE	FALSE	FALSE	FALSE
chr1	10259494	10259601	108	*	mm10_rmsk	exon	691		B2_Mm2	B2_Mm2_dup185	B2	SINE	26824	Arfgef1	ENSMUST00000088615.10	intergenic	intergenic	intergenic	-1.309	0.88609	29.594	1.03979e-06	7.04612e-05	0.10167	14.026	5.41603	0.0359684	0.0559787	0	0	TRUE	TRUE	TRUE	FALSE	FALSE	FALSE
chr1	10282584	10282705	122	*	mm10_rmsk	exon	459		B4	B4_dup106	B4	SINE	49914	Arfgef1	ENSMUST00000088615.10	intergenic	intergenic	intergenic	-2.00434	-2.43284	10.8139	0.00168983	0.0213774	0.0559679	13.6316	3.88846	0.0693232	0.0998362	0	0	FALSE	FALSE	FALSE	FALSE	FALSE	FALSE
chr1	10283338	10283517	180	*	mm10_rmsk	exon	422		LTR40a	LTR40a_dup1	ERVL	LTR	50668	Arfgef1	ENSMUST00000088615.10	intergenic	intergenic	intergenic	1.53772	-2.315	8.33961	0.00539128	0.0494017	-0.13129	7.56029	16.2644	0.00130522	0.00286381	5.28225e-110	1.30042e-109	FALSE	FALSE	FALSE	FALSE	FALSE	FALSE
chr1	10292010	10292143	134	*	mm10_rmsk	exon	244		RMER15	RMER15_dup43	ERVL	LTR	59340	Arfgef1	ENSMUST00000088615.10	intergenic	intergenic	intergenic	-1.86915	-0.395101	37.7204	7.17191e-08	1.04778e-05	-0.386955	12.6786	57.0863	3.17301e-06	2.43192e-05	0	0	TRUE	FALSE	TRUE	FALSE	FALSE	FALSE
chr1	10294556	10294648	93	*	mm10_rmsk	exon	1734		MT2B1	MT2B1_dup15	ERVL	LTR	61886	Arfgef1	ENSMUST00000088615.10	intergenic	intergenic	intergenic	-1.04793	-0.629979	12.7788	0.00070067	0.0109972	0.312012	10.3235	94.5783	1.70124e-07	3.88507e-06	0	0	FALSE	FALSE	FALSE	FALSE	FALSE	TRUE
chr1	10379236	10379543	308	*	mm10_rmsk	exon	901		MTEb	MTEb_dup10	ERVL-MaLR	LTR	-72446	RP23-418C16.1	ENSMUST00000194845.1	intronic	intronic	gene_body	-1.31121	1.22318	29.6763	1.01068e-06	6.89351e-05	-0.282978	11.7232	45.887	1.0449e-05	5.59444e-05	0	0	TRUE	TRUE	TRUE	FALSE	FALSE	FALSE
chr1	10408398	10408771	374	*	mm10_rmsk	exon	956		MTE2a	MTE2a_dup28	ERVL-MaLR	LTR	-43218	RP23-418C16.1	ENSMUST00000194845.1	intronic	intronic	gene_body	-1.12486	-1.39737	9.27863	0.00344539	0.0360251	-0.169323	12.136	28.5191	0.000115331	0.000368901	0	0	FALSE	FALSE	FALSE	FALSE	FALSE	FALSE
chr1	10444984	10446300	1317	*	mm10_rmsk	exon	7487		L1Md_F2	L1Md_F2_dup285	L1	LINE	-5689	RP23-418C16.1	ENSMUST00000194845.1	intronic	intronic	gene_body	1.21849	-1.77896	8.5413	0.00489289	0.0461721	0.519061	15.1429	139.838	1.55383e-08	1.93193e-06	0	0	FALSE	FALSE	FALSE	FALSE	FALSE	FALSE
chr1	10603550	10603943	394	*	mm10_rmsk	exon	1928		ERVB7_4-LTR_MM	ERVB7_4-LTR_MM_dup2	ERVK	LTR	47890	Gm25253	ENSMUST00000179958.1	intronic	intronic	gene_body	-1.38291	-1.7217	11.5048	0.00123527	0.0169272	-0.0723437	5.81513	2.54636	0.133531	0.175996	5.65241e-56	1.054e-55	TRUE	FALSE	TRUE	FALSE	FALSE	FALSE
chr1	10622774	10623238	465	*	mm10_rmsk	exon	1625		RMER4B	RMER4B_dup18	ERVK	LTR	67114	Gm25253	ENSMUST00000179958.1	intronic	intronic	gene_body	-1.47752	-1.24162	16.3311	0.000154006	0.00336395	-0.0488324	10.4274	1.90913	0.189351	0.238339	0	0	FALSE	FALSE	FALSE	FALSE	FALSE	FALSE
chr1	10624122	10625930	1809	*	mm10_rmsk	exon	8226		L1_Mus1	L1_Mus1_dup154	L1	LINE	68462	Gm25253	ENSMUST00000179958.1	intronic	intronic	gene_body	1.2866	-1.21343	14.9713	0.000272115	0.00526624	0.568501	13.4728	115.916	4.95501e-08	3.05101e-06	0	0	FALSE	FALSE	FALSE	FALSE	FALSE	FALSE
chr1	10663747	10664453	707	*	mm10_rmsk	exon	5835		L1_Mus1	L1_Mus1_dup156	L1	LINE	-30670	AC102426.1	ENSMUST00000119252.1	intronic	intronic	gene_body	1.57758	-2.22092	8.85373	0.00421411	0.041559	0.568501	13.4728	115.916	4.95501e-08	3.05101e-06	0	0	FALSE	FALSE	FALSE	FALSE	FALSE	FALSE
chr1	10723538	10723976	439	*	mm10_rmsk	exon	747		MLTR14	MLTR14_dup26	ERV1	LTR	3593	Cpa6	ENSMUST00000153695.7	intergenic	intergenic	intergenic	-1.13681	-1.37784	9.33179	0.00336011	0.0353879	-0.0952499	10.955	14.6774	0.00192872	0.00404165	0	0	TRUE	FALSE	TRUE	FALSE	FALSE	FALSE
chr1	10823239	10823546	308	*	mm10_rmsk	exon	1114		Lx2	Lx2_dup95	L1	LINE	17958	RP24-88A10.1	ENSMUST00000189483.1	intergenic	intergenic	intergenic	1.98282	-2.46456	9.07711	0.0037898	0.0385588	0.329614	12.88	47.1621	9.02254e-06	5.15113e-05	0	0	FALSE	FALSE	FALSE	FALSE	FALSE	FALSE
chr1	10933702	10934133	432	*	mm10_rmsk	exon	2001		RMER13B	RMER13B_dup16	ERVK	LTR	12032	Gm22963	ENSMUST00000157960.1	intergenic	intergenic	intergenic	-1.15492	0.347848	18.6852	5.91553e-05	0.00157974	-0.464354	11.2305	71.0692	9.15296e-07	1.03456e-05	0	0	TRUE	FALSE	TRUE	FALSE	FALSE	FALSE
chr1	10957041	10957364	324	*	mm10_rmsk	exon	1741		RLTR9A3	RLTR9A3_dup8	ERVK	LTR	35371	Gm22963	ENSMUST00000157960.1	intergenic	intergenic	intergenic	-1.27891	-0.901967	16.6112	0.00013718	0.00307154	-0.620645	8.47341	76.3687	7.11385e-07	9.04591e-06	0	0	TRUE	FALSE	TRUE	FALSE	FALSE	FALSE
chr1	11107876	11108445	570	*	mm10_rmsk	exon	1889		RLTR34C_MM	RLTR34C_MM_dup8	ERVK	LTR	9346	Prex2	ENSMUST00000189822.1	intronic	intronic	gene_body	-1.08879	-0.187695	16.9291	0.000120375	0.00277104	-0.830569	8.47904	83.1438	1.06591e-06	1.10524e-05	0	0	TRUE	FALSE	TRUE	FALSE	FALSE	FALSE
chr1	11177791	11178001	211	*	mm10_rmsk	exon	293		RLTR16C_MM	RLTR16C_MM_dup9	ERVK	LTR	37100	Prex2	ENSMUST00000187694.1	intronic	intronic	gene_body	-1.00941	-0.351133	13.8661	0.000436357	0.00762303	-0.934187	8.63343	51.7549	2.28744e-05	0.000101978	0	0	TRUE	TRUE	TRUE	FALSE	FALSE	FALSE
chr1	11324293	11324586	294	*	mm10_rmsk	exon	532		RLTR51A_Mm	RLTR51A_Mm_dup12	ERVK	LTR	40300	Prex2	ENSMUST00000188154.1	intergenic	intergenic	intergenic	-1.19252	1.0866	23.8368	8.15094e-06	0.000334935	0.244304	8.95566	7.63279	0.0175094	0.0291129	3.25976e-273	1.39001e-272	TRUE	TRUE	TRUE	TRUE	FALSE	TRUE
chr1	11324772	11324874	103	*	mm10_rmsk	exon	371		RodERV21-int	RodERV21-int_dup15	ERV1	LTR	40779	Prex2	ENSMUST00000188154.1	intergenic	intergenic	intergenic	-1.57441	-0.216857	33.3955	2.88537e-07	2.77337e-05	0.248924	9.76749	24.412	0.000236773	0.0006657	0	0	FALSE	FALSE	FALSE	TRUE	FALSE	TRUE
chr1	11324871	11325718	848	*	mm10_rmsk	exon	908		RodERV21-int	RodERV21-int_dup16	ERV1	LTR	40878	Prex2	ENSMUST00000188154.1	intergenic	intergenic	intergenic	-1.15861	0.27127	23.1415	1.05638e-05	0.000409119	0.248924	9.76749	24.412	0.000236773	0.0006657	0	0	FALSE	FALSE	FALSE	TRUE	FALSE	TRUE
chr1	11330144	11330450	307	*	mm10_rmsk	exon	1414		RLTR9A3	RLTR9A3_dup9	ERVK	LTR	-36514	RP23-366M5.2	ENSMUST00000193623.1	intergenic	intergenic	intergenic	-1.03402	-0.324873	12.822	0.0006875	0.0108392	-0.620645	8.47341	76.3687	7.11385e-07	9.04591e-06	0	0	TRUE	TRUE	FALSE	TRUE	FALSE	FALSE
chr1	11330632	11332284	1653	*	mm10_rmsk	exon	6514		L1_Mus3	L1_Mus3_dup290	L1	LINE	-34680	RP23-366M5.2	ENSMUST00000193623.1	intergenic	intergenic	intergenic	1.00885	-1.21249	9.29706	0.00341557	0.0358006	0.491166	14.0232	104.073	9.55672e-08	3.14529e-06	0	0	FALSE	FALSE	FALSE	FALSE	FALSE	FALSE
chr1	11374024	11375387	1364	*	mm10_rmsk	exon	9039		L1Md_F	L1Md_F_dup29	L1	LINE	7060	RP23-366M5.2	ENSMUST00000193623.1	intergenic	intergenic	intergenic	1.57495	-1.93411	12.7116	0.000721707	0.011251	0.68782	11.2456	113.731	7.70863e-08	3.05101e-06	0	0	FALSE	FALSE	FALSE	FALSE	FALSE	TRUE
chr1	11515585	11515827	243	*	mm10_rmsk	exon	913		RLTR20D	RLTR20D_dup5	ERVK	LTR	-2844	AC103635.1	ENSMUST00000141339.2	intronic	intronic	gene_body	-1.78252	-2.11355	11.6046	0.00118103	0.0163624	-0.826087	9.45256	38.1948	9.17838e-05	0.000306794	0	0	FALSE	FALSE	FALSE	FALSE	FALSE	FALSE
chr1	11521631	11521733	103	*	mm10_rmsk	exon	586		Lx2B	Lx2B_dup14	L1	LINE	2960	AC103635.1	ENSMUST00000141339.2	intronic	intronic	gene_body	-1.34542	-0.81157	18.5674	6.20044e-05	0.00164039	0.21701	11.4789	26.956	0.000150288	0.000460745	0	0	TRUE	FALSE	TRUE	FALSE	FALSE	FALSE
chr1	11521734	11521837	104	*	mm10_rmsk	exon	623		RLTRETN_Mm	RLTRETN_Mm_dup18	ERVK	LTR	3063	AC103635.1	ENSMUST00000141339.2	intronic	intronic	gene_body	-1.6065	0.231812	37.4502	7.80833e-08	1.10952e-05	-0.536374	9.3262	60.9698	2.73033e-06	2.18231e-05	0	0	TRUE	FALSE	TRUE	FALSE	FALSE	FALSE
chr1	11521838	11521882	45	*	mm10_rmsk	exon	364		RLTR31_Mm	RLTR31_Mm_dup1	ERVK	LTR	3167	AC103635.1	ENSMUST00000141339.2	intronic	intronic	gene_body	-1.3505	-0.322278	23.2378	1.01897e-05	0.000397569	-0.46932	6.07681	52.0135	5.30533e-06	3.51282e-05	2.08911e-63	4.07719e-63	TRUE	FALSE	TRUE	FALSE	FALSE	FALSE
chr1	11521905	11522345	441	*	mm10_rmsk	exon	3608		L1Md_F2	L1Md_F2_dup317	L1	LINE	3234	AC103635.1	ENSMUST00000141339.2	intronic	intronic	gene_body	-1.20623	0.243127	22.463	1.36371e-05	0.000498243	0.519061	15.1429	139.838	1.55383e-08	1.93193e-06	0	0	TRUE	TRUE	TRUE	FALSE	FALSE	FALSE
chr1	11535203	11536160	958	*	mm10_rmsk	exon	7221		IAPEY5_I-int	IAPEY5_I-int	ERVK	LTR	16532	AC103635.1	ENSMUST00000141339.2	intronic	intronic	gene_body	1.54222	-1.88387	12.5011	0.000791927	0.0120765	0.478567	5.93371	23.2845	0.000383237	0.000990399	9.54266e-38	1.53171e-37	FALSE	FALSE	FALSE	FALSE	FALSE	FALSE
chr1	11588767	11588913	147	*	mm10_rmsk	exon	361		RSINE1	RSINE1_dup208	B4	SINE	9461	AC103635.1	ENSMUST00000191437.1	intronic	intronic	gene_body	-1.80833	-1.35414	18.5359	6.27911e-05	0.00165776	0.0578688	14.2698	3.88326	0.0694883	0.0999452	0	0	FALSE	FALSE	FALSE	FALSE	FALSE	FALSE
chr1	11625777	11627016	1240	*	mm10_rmsk	exon	9660		L1Md_Gf	L1Md_Gf_dup5	L1	LINE	17377	RP24-467J24.2	ENSMUST00000188880.1	intronic	intronic	gene_body	1.11554	-1.50236	9.45768	0.00316686	0.0339349	0.50571	9.83266	88.3279	2.55903e-07	5.12027e-06	0	0	TRUE	TRUE	FALSE	FALSE	FALSE	FALSE
chr1	11689877	11691233	1357	*	mm10_rmsk	exon	30697		L1_Mus3	L1_Mus3_dup308	L1	LINE	-12974	RP24-239K20.1	ENSMUST00000195360.1	intronic	intronic	gene_body	1.18246	-1.27137	10.8747	0.00164358	0.0209401	0.491166	14.0232	104.073	9.55672e-08	3.14529e-06	0	0	FALSE	FALSE	FALSE	FALSE	FALSE	FALSE
chr1	11710992	11714376	3385	*	mm10_rmsk	exon	6065		MYSERV16_I-int	MYSERV16_I-int_dup16	ERVK	LTR	6785	RP24-239K20.1	ENSMUST00000195360.1	intronic	intronic	gene_body	1.22747	-0.838489	14.4996	0.000332516	0.00616335	0.396506	9.15635	79.5402	4.75236e-07	6.73151e-06	4.2108e-260	1.69331e-259	FALSE	FALSE	FALSE	FALSE	FALSE	FALSE
chr1	11761819	11762056	238	*	mm10_rmsk	exon	680		MTC	MTC_dup105	ERVL-MaLR	LTR	57612	RP24-239K20.1	ENSMUST00000195360.1	intronic	intronic	gene_body	1.82677	-2.39866	9.57862	0.00299215	0.0325709	-0.0712501	12.9646	7.63021	0.0156148	0.0261341	0	0	FALSE	FALSE	FALSE	FALSE	FALSE	FALSE
chr1	11896933	11900588	3656	*	mm10_rmsk	exon	19053		L1VL4	L1VL4_dup44	L1	LINE	192726	RP24-239K20.1	ENSMUST00000195360.1	intronic	intronic	gene_body	1.20357	-0.516332	17.1875	0.000108295	0.0025484	0.46762	11.3684	120.293	3.9467e-08	2.94424e-06	0	0	FALSE	FALSE	FALSE	FALSE	FALSE	FALSE
chr1	11903644	11905157	1514	*	mm10_rmsk	exon	26656		MERVL_2A-int	MERVL_2A-int_dup30	ERVL	LTR	199437	RP24-239K20.1	ENSMUST00000195360.1	intronic	intronic	gene_body	1.17374	-1.49575	10.0949	0.00235235	0.0273342	0.421914	10.1471	113.592	5.60901e-08	3.05101e-06	0	0	FALSE	FALSE	FALSE	FALSE	FALSE	FALSE
chr1	11922653	11924856	2204	*	mm10_rmsk	exon	31234		L1_Mus2	L1_Mus2_dup113	L1	LINE	-196104	RP23-334J7.1	ENSMUST00000187748.1	intronic	intronic	gene_body	1.09643	-1.23608	10.81	0.00169286	0.0214053	0.484439	13.0175	105.113	8.99763e-08	3.05101e-06	0	0	FALSE	FALSE	FALSE	FALSE	FALSE	TRUE
chr1	11942210	11943247	1038	*	mm10_rmsk	exon	8321		Lx3_Mus	Lx3_Mus_dup49	L1	LINE	-177713	RP23-334J7.1	ENSMUST00000187748.1	intronic	intronic	gene_body	1.55724	-1.53208	15.8597	0.000187338	0.00392833	0.490828	12.3525	77.1477	5.68276e-07	7.57815e-06	0	0	FALSE	FALSE	FALSE	FALSE	FALSE	FALSE
chr1	11995426	11995724	299	*	mm10_rmsk	exon	526		MER2	MER2_dup42	TcMar-Tigger	DNA	-125236	RP23-334J7.1	ENSMUST00000187748.1	intergenic	intergenic	intergenic	1.90627	-2.47089	9.86189	0.00262125	0.0295772	0.197037	10.6909	40.96	1.90215e-05	8.98103e-05	0	0	FALSE	FALSE	FALSE	FALSE	FALSE	FALSE
chr1	12042938	12043522	585	*	mm10_rmsk	exon	2924		Lx5b	Lx5b_dup12	L1	LINE	-77438	RP23-334J7.1	ENSMUST00000187748.1	intergenic	intergenic	intergenic	1.64771	-2.17188	10.8409	0.00166911	0.0211781	0.335052	11.4671	61.8767	2.01907e-06	1.73251e-05	0	0	FALSE	FALSE	FALSE	FALSE	FALSE	FALSE
chr1	12060348	12060746	399	*	mm10_rmsk	exon	2743		BGLII	BGLII_dup12	ERVK	LTR	-60214	RP23-334J7.1	ENSMUST00000187748.1	intergenic	intergenic	intergenic	-1.57949	-2.01806	10.5586	0.00189937	0.0233335	0.185257	9.08652	33.4917	5.29208e-05	0.000189923	2.43845e-195	7.96372e-195	FALSE	FALSE	FALSE	FALSE	FALSE	FALSE
chr1	12060747	12060771	25	*	mm10_rmsk	exon	343		MER31B	MER31B_dup2	ERV1	LTR	-60189	RP23-334J7.1	ENSMUST00000187748.1	intergenic	intergenic	intergenic	-2.83754	-2.69145	12.7988	0.000694542	0.0109237	-0.076839	7.09512	6.32397	0.0251824	0.0404872	1.78285e-85	3.89676e-85	FALSE	FALSE	TRUE	FALSE	FALSE	FALSE
chr1	12142609	12143969	1361	*	mm10_rmsk	exon	1987		L1M2c	L1M2c_dup1	L1	LINE	21649	RP23-334J7.1	ENSMUST00000187748.1	intergenic	intergenic	intergenic	1.64459	-1.99267	12.2566	0.000882533	0.0131184	0.0513885	5.76126	0.949279	0.346926	0.399885	5.33263e-30	8.0238e-30	FALSE	FALSE	FALSE	FALSE	FALSE	FALSE
chr1	12164134	12167434	3301	*	mm10_rmsk	exon	21333		L1_Mus4	L1_Mus4_dup65	L1	LINE	43174	RP23-334J7.1	ENSMUST00000187748.1	intergenic	intergenic	intergenic	1.10822	-0.697197	15.3963	0.000227455	0.00457479	0.534569	12.2714	89.1906	2.41524e-07	5.00491e-06	0	0	FALSE	FALSE	FALSE	FALSE	FALSE	FALSE
chr1	12200014	12201001	988	*	mm10_rmsk	exon	4495		Lx5	Lx5_dup70	L1	LINE	79054	RP23-334J7.1	ENSMUST00000187748.1	intergenic	intergenic	intergenic	1.39774	-1.42807	14.9896	0.000270019	0.00523532	0.344861	12.7349	51.5136	5.59317e-06	3.66009e-05	0	0	FALSE	FALSE	FALSE	FALSE	FALSE	FALSE
chr1	12201962	12203650	1689	*	mm10_rmsk	exon	5685		L1VL4	L1VL4_dup47	L1	LINE	81002	RP23-334J7.1	ENSMUST00000187748.1	intergenic	intergenic	intergenic	1.0325	-1.37545	8.6812	0.00457576	0.0440364	0.46762	11.3684	120.293	3.9467e-08	2.94424e-06	0	0	FALSE	FALSE	FALSE	FALSE	FALSE	FALSE
chr1	12253358	12253751	394	*	mm10_rmsk	exon	1562		Lx5c	Lx5c_dup105	L1	LINE	-121185	Gm22633	ENSMUST00000179834.1	intergenic	intergenic	intergenic	1.89201	-2.57167	9.04563	0.00384678	0.0389695	0.275621	12.3036	49.7246	6.78061e-06	4.22898e-05	0	0	FALSE	FALSE	FALSE	FALSE	FALSE	FALSE
chr1	12329743	12331042	1300	*	mm10_rmsk	exon	4528		Lx5c	Lx5c_dup106	L1	LINE	-43894	Gm22633	ENSMUST00000179834.1	intergenic	intergenic	intergenic	1.01061	-0.961258	11.0606	0.00151023	0.0196708	0.275621	12.3036	49.7246	6.78061e-06	4.22898e-05	0	0	FALSE	FALSE	FALSE	FALSE	FALSE	FALSE
chr1	12333657	12334246	590	*	mm10_rmsk	exon	1511		Lx8	Lx8_dup207	L1	LINE	-40690	Gm22633	ENSMUST00000179834.1	intergenic	intergenic	intergenic	-1.27759	-0.945557	14.9608	0.000273329	0.00528411	0.121817	13.7403	15.9377	0.00141182	0.00306763	0	0	FALSE	FALSE	FALSE	FALSE	FALSE	FALSE
chr1	12467950	12469005	1056	*	mm10_rmsk	exon	12463		L1Md_F2	L1Md_F2_dup354	L1	LINE	41964	Mir6341	ENSMUST00000183490.1	intergenic	intergenic	intergenic	1.72127	-2.29887	9.44657	0.00318345	0.0340587	0.519061	15.1429	139.838	1.55383e-08	1.93193e-06	0	0	FALSE	FALSE	FALSE	FALSE	FALSE	FALSE
chr1	12474118	12474930	813	*	mm10_rmsk	exon	5454		Lx3C	Lx3C_dup20	L1	LINE	48132	Mir6341	ENSMUST00000183490.1	intergenic	intergenic	intergenic	1.49098	-2.11994	9.01129	0.00390996	0.0394199	0.410616	11.371	55.7072	3.635e-06	2.65854e-05	0	0	FALSE	FALSE	FALSE	FALSE	FALSE	FALSE
chr1	12496650	12498140	1491	*	mm10_rmsk	exon	6933		ORR1C1-int	ORR1C1-int_dup11	ERVL-MaLR	LTR	-67437	RP23-138D5.1	ENSMUST00000181461.1	intergenic	intergenic	intergenic	1.20348	-1.13597	12.5462	0.000776322	0.0118925	0.276304	8.11482	89.2194	2.4106e-07	5.00491e-06	3.5991e-109	8.84126e-109	FALSE	FALSE	FALSE	FALSE	FALSE	FALSE
chr1	12498965	12499124	160	*	mm10_rmsk	exon	258		ORR1G	ORR1G_dup18	ERVL-MaLR	LTR	-66453	RP23-138D5.1	ENSMUST00000181461.1	intergenic	intergenic	intergenic	2.10777	-2.57915	10.6539	0.00181816	0.022578	0.0498848	10.0305	2.41065	0.143482	0.187329	0	0	FALSE	FALSE	FALSE	FALSE	FALSE	FALSE
chr1	12506487	12506812	326	*	mm10_rmsk	exon	301		RLTR17B_Mm	RLTR17B_Mm_dup58	ERVK	LTR	-58765	RP23-138D5.1	ENSMUST00000181461.1	intergenic	intergenic	intergenic	1.84436	-2.33577	11.2739	0.001371	0.0183045	0.843045	11.4296	151.218	1.93757e-08	2.16814e-06	0	0	FALSE	FALSE	FALSE	FALSE	FALSE	FALSE
chr1	12512638	12514711	2074	*	mm10_rmsk	exon	7576		L1Md_F	L1Md_F_dup35	L1	LINE	-50866	RP23-138D5.1	ENSMUST00000181461.1	intergenic	intergenic	intergenic	1.70737	-1.30861	22.5359	1.32666e-05	0.000487719	0.68782	11.2456	113.731	7.70863e-08	3.05101e-06	0	0	FALSE	FALSE	FALSE	FALSE	FALSE	TRUE
chr1	12515130	12516098	969	*	mm10_rmsk	exon	7179		L1Md_F2	L1Md_F2_dup357	L1	LINE	-49479	RP23-138D5.1	ENSMUST00000181461.1	intergenic	intergenic	intergenic	1.13333	-1.67212	9.19026	0.0035922	0.0371148	0.519061	15.1429	139.838	1.55383e-08	1.93193e-06	0	0	FALSE	FALSE	FALSE	FALSE	FALSE	FALSE
chr1	12516979	12517374	396	*	mm10_rmsk	exon	3444		MTA_Mm	MTA_Mm_dup101	ERVL-MaLR	LTR	-48203	RP23-138D5.1	ENSMUST00000181461.1	intergenic	intergenic	intergenic	1.67996	-2.50066	8.6949	0.00454591	0.0438328	0.182177	12.2533	25.2866	0.000201809	0.000582022	0	0	FALSE	FALSE	FALSE	FALSE	FALSE	FALSE
chr1	12541551	12541907	357	*	mm10_rmsk	exon	1283		ORR1E	ORR1E_dup66	ERVL-MaLR	LTR	-23670	RP23-138D5.1	ENSMUST00000181461.1	intergenic	intergenic	intergenic	1.57746	-2.33432	9.00942	0.00391343	0.0394431	-0.325711	12.9387	82.3757	3.86776e-07	6.01114e-06	0	0	FALSE	FALSE	FALSE	FALSE	FALSE	FALSE
chr1	12551058	12551548	491	*	mm10_rmsk	exon	2595		RLTR31A_Mm	RLTR31A_Mm	ERVK	LTR	-14029	RP23-138D5.1	ENSMUST00000181461.1	intergenic	intergenic	intergenic	-1.0403	0.502594	18.3647	6.72483e-05	0.00175205	-0.985216	8.26018	36.4296	0.000114206	0.000368901	8.83163e-206	2.98795e-205	TRUE	TRUE	TRUE	FALSE	FALSE	TRUE
chr1	12551742	12551955	214	*	mm10_rmsk	exon	383		RMER10A	RMER10A_dup17	ERVL	LTR	-13622	RP23-138D5.1	ENSMUST00000181461.1	intergenic	intergenic	intergenic	-1.09136	-0.740919	13.837	0.000441875	0.00769649	-0.288616	11.0043	61.0595	2.17634e-06	1.83107e-05	0	0	TRUE	FALSE	TRUE	FALSE	FALSE	FALSE
chr1	12552128	12552216	89	*	mm10_rmsk	exon	373		PB1D10	PB1D10_dup161	Alu	SINE	-13361	RP23-138D5.1	ENSMUST00000181461.1	intergenic	intergenic	intergenic	-1.27148	-1.03563	12.8653	0.000674532	0.0106871	-0.196601	13.5951	25.3633	0.00019904	0.000578507	0	0	TRUE	FALSE	TRUE	FALSE	FALSE	FALSE
chr1	12552221	12552461	241	*	mm10_rmsk	exon	849		B4	B4_dup137	B4	SINE	-13116	RP23-138D5.1	ENSMUST00000181461.1	intergenic	intergenic	intergenic	-1.14616	-0.930476	12.5721	0.000767467	0.0117912	0.0559679	13.6316	3.88846	0.0693232	0.0998362	0	0	FALSE	FALSE	FALSE	FALSE	FALSE	FALSE
chr1	12587016	12587398	383	*	mm10_rmsk	exon	2568		RLTR9E	RLTR9E_dup16	ERVK	LTR	21439	RP23-138D5.1	ENSMUST00000181461.1	intergenic	intergenic	intergenic	-1.26935	-0.0257498	21.328	2.10183e-05	0.000698454	-0.166882	9.19908	12.3508	0.00357867	0.00699956	0	0	TRUE	FALSE	TRUE	FALSE	FALSE	FALSE
chr1	12601211	12602116	906	*	mm10_rmsk	exon	3477		MMERVK10C-int	MMERVK10C-int_dup22	ERVK	LTR	35634	RP23-138D5.1	ENSMUST00000181461.1	intergenic	intergenic	intergenic	1.86765	-1.88607	18.434	6.54056e-05	0.00171307	0.487995	10.4539	182.936	2.86303e-09	1.48073e-06	0	0	FALSE	FALSE	FALSE	FALSE	FALSE	FALSE
chr1	12621017	12621122	106	*	mm10_rmsk	exon	317		MLT1O	MLT1O_dup1	ERVL-MaLR	LTR	-34745	RP24-331K22.1	ENSMUST00000182390.1	intergenic	intergenic	intergenic	-1.29587	0.970937	28.5058	1.51722e-06	9.31005e-05	-0.773246	8.4535	43.2643	4.31108e-05	0.000161341	1.38786e-221	4.90089e-221	TRUE	TRUE	TRUE	FALSE	FALSE	FALSE
chr1	12621140	12621350	211	*	mm10_rmsk	exon	255		BGLII_B2	BGLII_B2_dup3	ERVK	LTR	-34517	RP24-331K22.1	ENSMUST00000182390.1	intergenic	intergenic	intergenic	-1.51861	-0.45428	26.7601	2.81156e-06	0.000147879	0.0429362	6.3703	0.817493	0.381661	0.435003	1.20206e-46	2.07378e-46	TRUE	TRUE	TRUE	FALSE	FALSE	FALSE
chr1	12643795	12644341	547	*	mm10_rmsk	exon	2930		RLTR20D	RLTR20D_dup6	ERVK	LTR	-11526	RP24-331K22.1	ENSMUST00000182390.1	intergenic	intergenic	intergenic	-1.67978	2.19989	40.7432	2.81659e-08	5.59247e-06	-0.826087	9.45256	38.1948	9.17838e-05	0.000306794	0	0	TRUE	TRUE	TRUE	FALSE	FALSE	FALSE
chr1	12645109	12646126	1018	*	mm10_rmsk	exon	3151		L1_Mur3	L1_Mur3_dup183	L1	LINE	-9741	RP24-331K22.1	ENSMUST00000182390.1	intergenic	intergenic	intergenic	1.33169	-2.01383	9.22778	0.00352909	0.0366555	0.334543	12.3059	85.3852	3.12894e-07	5.33454e-06	0	0	FALSE	FALSE	FALSE	FALSE	FALSE	FALSE
chr1	12649349	12650617	1269	*	mm10_rmsk	exon	15986		L1VL4	L1VL4_dup51	L1	LINE	-5250	RP24-331K22.1	ENSMUST00000182390.1	intergenic	intergenic	intergenic	2.44907	-2.39821	16.5808	0.000138913	0.003102	0.46762	11.3684	120.293	3.9467e-08	2.94424e-06	0	0	FALSE	FALSE	FALSE	FALSE	FALSE	FALSE
chr1	12697519	12697700	182	*	mm10_rmsk	exon	598		B3	B3_dup341	B2	SINE	4987	Sulf1	ENSMUST00000186051.6	intronic	intronic	gene_body	-1.2871	-1.00514	16.4235	0.000148235	0.00326533	-0.0408682	15.0047	1.97967	0.18188	0.229711	0	0	TRUE	FALSE	TRUE	FALSE	FALSE	FALSE
chr1	12711261	12711349	89	*	mm10_rmsk	exon	373		B1_Mur1	B1_Mur1_dup87	Alu	SINE	-7110	Sulf1	ENSMUST00000187376.6	intronic	intronic	gene_body	-1.12222	-1.28127	10.1887	0.00225232	0.0264741	-0.179663	13.0741	14.4372	0.00205038	0.00424761	0	0	FALSE	FALSE	FALSE	FALSE	FALSE	FALSE
chr1	12739963	12740189	227	*	mm10_rmsk	exon	9873		L1_Mus1	L1_Mus1_dup189	L1	LINE	11844	Sulf1	ENSMUST00000186405.6	intronic	intronic	gene_body	1.61076	-2.37374	9.32262	0.00337466	0.0355023	0.568501	13.4728	115.916	4.95501e-08	3.05101e-06	0	0	FALSE	FALSE	FALSE	FALSE	FALSE	FALSE
chr1	12750774	12751643	870	*	mm10_rmsk	exon	3979		Lx5b	Lx5b_dup14	L1	LINE	22655	Sulf1	ENSMUST00000186405.6	intronic	intronic	gene_body	-1.24185	0.865148	24.8502	5.60998e-06	0.000250472	0.335052	11.4671	61.8767	2.01907e-06	1.73251e-05	0	0	TRUE	TRUE	TRUE	FALSE	FALSE	FALSE
chr1	12773586	12774224	639	*	mm10_rmsk	exon	4741		L1_Mus3	L1_Mus3_dup327	L1	LINE	-11219	Sulf1	ENSMUST00000186674.1	intronic	intronic	gene_body	1.87708	-1.87336	13.4709	0.000517769	0.00870771	0.491166	14.0232	104.073	9.55672e-08	3.14529e-06	0	0	FALSE	FALSE	FALSE	FALSE	FALSE	FALSE
chr1	12863728	12864209	482	*	mm10_rmsk	exon	3727		L1_Mus1	L1_Mus1_dup191	L1	LINE	20937	Sulf1	ENSMUST00000185780.1	intergenic	intergenic	intergenic	-1.07629	-0.906233	11.4919	0.00124249	0.0170019	0.568501	13.4728	115.916	4.95501e-08	3.05101e-06	0	0	TRUE	FALSE	TRUE	FALSE	FALSE	FALSE
chr1	12865432	12865708	277	*	mm10_rmsk	exon	299		L1MA5	L1MA5_dup14	L1	LINE	22641	Sulf1	ENSMUST00000185780.1	intergenic	intergenic	intergenic	-1.48099	1.52481	33.9353	2.41618e-07	2.44643e-05	0.173385	9.74086	39.2368	2.37666e-05	0.000105118	0	0	TRUE	TRUE	TRUE	FALSE	FALSE	FALSE
chr1	12935858	12936069	212	*	mm10_rmsk	exon	847		B3	B3_dup358	B2	SINE	10815	Slco5a1	ENSMUST00000133201.2	intronic	intronic	gene_body	-1.05797	-0.0583506	14.8767	0.000283235	0.00543292	-0.0408682	15.0047	1.97967	0.18188	0.229711	0	0	TRUE	TRUE	TRUE	FALSE	FALSE	FALSE
chr1	12939736	12939831	96	*	mm10_rmsk	exon	497		B1_Mur4	B1_Mur4_dup88	Alu	SINE	14693	Slco5a1	ENSMUST00000133201.2	intronic	intronic	gene_body	-1.11199	0.779883	18.7061	5.86626e-05	0.00156975	-0.197949	13.0761	16.1554	0.00133973	0.00293351	0	0	TRUE	TRUE	TRUE	FALSE	FALSE	FALSE
chr1	12996604	12996703	100	*	mm10_rmsk	exon	641		LTRIS6	LTRIS6_dup1	ERV1	LTR	3954	Slco5a1	ENSMUST00000188454.6	intergenic	intergenic	intergenic	-1.59954	-0.657177	25.4426	4.51971e-06	0.000212688	-0.11002	5.32731	1.72446	0.210859	0.261008	2.39838e-45	4.08773e-45	FALSE	FALSE	FALSE	FALSE	TRUE	FALSE
chr1	12997257	12997386	130	*	mm10_rmsk	exon	334		ID_B1	ID_B1_dup228	B4	SINE	4607	Slco5a1	ENSMUST00000188454.6	intergenic	intergenic	intergenic	-1.1107	-0.301371	14.9084	0.00027946	0.00537762	-0.175808	14.6041	23.3246	0.000290382	0.000788684	0	0	TRUE	TRUE	TRUE	FALSE	FALSE	FALSE
chr1	12999259	12999402	144	*	mm10_rmsk	exon	1127		B1_Mm	B1_Mm_dup142	Alu	SINE	6609	Slco5a1	ENSMUST00000188454.6	intergenic	intergenic	intergenic	1.64855	-2.41819	8.62978	0.00468976	0.0448114	-0.134862	12.9233	6.73414	0.0215837	0.0353101	0	0	FALSE	FALSE	FALSE	FALSE	FALSE	FALSE
chr1	13012348	13012456	109	*	mm10_rmsk	exon	281		B1_Mus2	B1_Mus2_dup205	Alu	SINE	19698	Slco5a1	ENSMUST00000188454.6	intergenic	intergenic	intergenic	-1.36261	-1.10835	17.0219	0.000115884	0.00268878	-0.176162	13.8323	10.0652	0.00699884	0.0128811	0	0	TRUE	FALSE	TRUE	FALSE	FALSE	FALSE
chr1	13012407	13012476	70	*	mm10_rmsk	exon	227		B4A	B4A_dup233	B4	SINE	19757	Slco5a1	ENSMUST00000188454.6	intergenic	intergenic	intergenic	-1.46036	-0.784123	22.4512	1.3698e-05	0.000499996	0.0753296	14.4644	7.74941	0.0149756	0.0252756	0	0	TRUE	FALSE	TRUE	FALSE	FALSE	FALSE
chr1	13012551	13012632	82	*	mm10_rmsk	exon	507		B1F2	B1F2_dup37	Alu	SINE	19901	Slco5a1	ENSMUST00000188454.6	intergenic	intergenic	intergenic	-1.3088	0.325535	24.1469	7.26668e-06	0.000306086	-0.209237	11.7791	21.8106	0.000389999	0.00100381	0	0	TRUE	FALSE	TRUE	FALSE	FALSE	FALSE
chr1	13012689	13013034	346	*	mm10_rmsk	exon	786		ORR1D2	ORR1D2_dup60	ERVL-MaLR	LTR	20039	Slco5a1	ENSMUST00000188454.6	intergenic	intergenic	intergenic	-1.24619	1.93378	23.5273	9.1456e-06	0.000366153	-0.192417	11.9933	47.1146	9.07148e-06	5.15279e-05	0	0	TRUE	TRUE	TRUE	TRUE	FALSE	FALSE
chr1	13015133	13015262	130	*	mm10_rmsk	exon	702		B1_Mur2	B1_Mur2_dup93	Alu	SINE	22483	Slco5a1	ENSMUST00000188454.6	intergenic	intergenic	intergenic	-1.48934	-1.14187	18.0594	7.60313e-05	0.00193006	-0.133884	12.7428	10.2743	0.00656262	0.0121381	0	0	FALSE	FALSE	FALSE	FALSE	FALSE	FALSE
chr1	13015283	13015313	31	*	mm10_rmsk	exon	712		B3	B3_dup365	B2	SINE	22633	Slco5a1	ENSMUST00000188454.6	intergenic	intergenic	intergenic	-1.39401	-1.38201	14.3864	0.000348984	0.00640402	-0.0408682	15.0047	1.97967	0.18188	0.229711	0	0	FALSE	FALSE	FALSE	FALSE	FALSE	FALSE
chr1	13019320	13019677	358	*	mm10_rmsk	exon	1445		MTD	MTD_dup183	ERVL-MaLR	LTR	26670	Slco5a1	ENSMUST00000188454.6	intergenic	intergenic	intergenic	-1.06095	0.371763	15.7617	0.000195157	0.00405451	-0.128328	13.8494	24.9898	0.000212962	0.000611037	0	0	TRUE	TRUE	TRUE	FALSE	FALSE	FALSE
chr1	13019698	13019721	24	*	mm10_rmsk	exon	1445		MTD	MTD_dup184	ERVL-MaLR	LTR	27048	Slco5a1	ENSMUST00000188454.6	intergenic	intergenic	intergenic	-1.03375	-0.14683	13.1889	0.000585438	0.00958528	-0.128328	13.8494	24.9898	0.000212962	0.000611037	0	0	TRUE	TRUE	TRUE	FALSE	FALSE	FALSE
chr1	13028807	13029632	826	*	mm10_rmsk	exon	1820		RMER17B2	RMER17B2_dup6	ERVK	LTR	-30319	RP24-178B14.2	ENSMUST00000191708.1	intergenic	intergenic	intergenic	-1.27898	0.966139	29.7935	9.70715e-07	6.69822e-05	-0.624956	10.1127	50.8372	1.4714e-05	7.18993e-05	0	0	TRUE	TRUE	TRUE	FALSE	FALSE	FALSE
chr1	13050860	13051204	345	*	mm10_rmsk	exon	1146		MTD	MTD_dup185	ERVL-MaLR	LTR	-8747	RP24-178B14.2	ENSMUST00000191708.1	intergenic	intergenic	intergenic	-1.11397	-0.925438	11.1122	0.00147524	0.0193268	-0.128328	13.8494	24.9898	0.000212962	0.000611037	0	0	FALSE	FALSE	FALSE	FALSE	FALSE	FALSE
chr1	13052563	13052702	140	*	mm10_rmsk	exon	1041		B1_Mm	B1_Mm_dup146	Alu	SINE	-7249	RP24-178B14.2	ENSMUST00000191708.1	intergenic	intergenic	intergenic	-1.33668	-0.904368	17.7891	8.48005e-05	0.00210326	-0.134862	12.9233	6.73414	0.0215837	0.0353101	0	0	TRUE	FALSE	TRUE	FALSE	FALSE	TRUE
chr1	13057687	13058026	340	*	mm10_rmsk	exon	1783		ERVB7_2B-LTR_MM	ERVB7_2B-LTR_MM_dup5	ERVK	LTR	-1925	RP24-178B14.2	ENSMUST00000191708.1	intergenic	intergenic	intergenic	-1.94674	-0.236612	46.8874	4.60037e-09	1.74955e-06	-0.835739	8.79374	51.3472	2.05966e-05	9.52381e-05	0	0	TRUE	FALSE	TRUE	FALSE	FALSE	FALSE
chr1	13069153	13069278	126	*	mm10_rmsk	exon	497		ORR1D2	ORR1D2_dup61	ERVL-MaLR	LTR	315	RP24-178B14.1	ENSMUST00000187394.1	intronic	proximal <=1000bp	Tss_prox_1kbp	-1.28401	0.0532168	23.2981	9.9622e-06	0.00039068	-0.192417	11.9933	47.1146	9.07148e-06	5.15279e-05	0	0	FALSE	FALSE	FALSE	TRUE	FALSE	TRUE
chr1	13069348	13069516	169	*	mm10_rmsk	exon	583		ORR1D2	ORR1D2_dup62	ERVL-MaLR	LTR	510	RP24-178B14.1	ENSMUST00000187394.1	intronic	proximal <=1000bp	Tss_prox_1kbp	-1.14547	0.168124	20.0011	3.51622e-05	0.00104732	-0.192417	11.9933	47.1146	9.07148e-06	5.15279e-05	0	0	TRUE	FALSE	TRUE	TRUE	FALSE	FALSE
chr1	13069553	13069765	213	*	mm10_rmsk	exon	1113		MTC	MTC_dup122	ERVL-MaLR	LTR	715	RP24-178B14.1	ENSMUST00000187394.1	intronic	proximal <=1000bp	Tss_prox_1kbp	-1.31075	1.20611	23.517	9.18053e-06	0.000367228	-0.0712501	12.9646	7.63021	0.0156148	0.0261341	0	0	TRUE	TRUE	TRUE	TRUE	FALSE	TRUE
chr1	13073971	13074087	117	*	mm10_rmsk	exon	478		PB1D9	PB1D9_dup68	Alu	SINE	5133	RP24-178B14.1	ENSMUST00000187394.1	intronic	intronic	gene_body	-1.66939	-0.769727	28.5121	1.51386e-06	9.29486e-05	-0.245535	12.562	18.2067	0.000833525	0.00193109	0	0	TRUE	FALSE	TRUE	FALSE	FALSE	FALSE
chr1	13075969	13076108	140	*	mm10_rmsk	exon	396		MLT2B1	MLT2B1_dup2	ERVL	LTR	7131	RP24-178B14.1	ENSMUST00000187394.1	intronic	intronic	gene_body	-1.41214	0.0913923	31.5828	5.27905e-07	4.28299e-05	0.146141	8.44944	18.915	0.00071294	0.0016938	1.06258e-180	3.33532e-180	TRUE	FALSE	TRUE	FALSE	FALSE	FALSE
chr1	13076589	13076617	29	*	mm10_rmsk	exon	365		ID_B1	ID_B1_dup242	B4	SINE	7751	RP24-178B14.1	ENSMUST00000187394.1	intronic	intronic	gene_body	-1.08545	-0.829296	12.7562	0.000707676	0.0110822	-0.175808	14.6041	23.3246	0.000290382	0.000788684	0	0	FALSE	FALSE	FALSE	FALSE	TRUE	TRUE
chr1	13078836	13078942	107	*	mm10_rmsk	exon	740		B3	B3_dup377	B2	SINE	9998	RP24-178B14.1	ENSMUST00000187394.1	intergenic	intergenic	intergenic	-1.41999	-1.92525	9.74232	0.00277157	0.0308078	-0.0408682	15.0047	1.97967	0.18188	0.229711	0	0	FALSE	FALSE	FALSE	FALSE	FALSE	FALSE
chr1	13078962	13079099	138	*	mm10_rmsk	exon	1236		B1_Mm	B1_Mm_dup150	Alu	SINE	10124	RP24-178B14.1	ENSMUST00000187394.1	intergenic	intergenic	intergenic	-1.64489	-0.506845	30.8643	6.73155e-07	5.1273e-05	-0.134862	12.9233	6.73414	0.0215837	0.0353101	0	0	TRUE	FALSE	TRUE	FALSE	FALSE	FALSE
chr1	13079192	13079274	83	*	mm10_rmsk	exon	346		PB1D10	PB1D10_dup186	Alu	SINE	10354	RP24-178B14.1	ENSMUST00000187394.1	intergenic	intergenic	intergenic	-1.44285	0.482219	25.8743	3.86526e-06	0.000188643	-0.196601	13.5951	25.3633	0.00019904	0.000578507	0	0	TRUE	TRUE	TRUE	FALSE	FALSE	FALSE
chr1	13085350	13085449	100	*	mm10_rmsk	exon	278		PB1D9	PB1D9_dup70	Alu	SINE	16512	RP24-178B14.1	ENSMUST00000187394.1	intergenic	intergenic	intergenic	-1.05174	0.0116035	15.4257	0.000224663	0.00453053	-0.245535	12.562	18.2067	0.000833525	0.00193109	0	0	TRUE	TRUE	TRUE	FALSE	FALSE	FALSE
chr1	13095114	13095259	146	*	mm10_rmsk	exon	454		PB1D10	PB1D10_dup190	Alu	SINE	26276	RP24-178B14.1	ENSMUST00000187394.1	intergenic	intergenic	intergenic	-1.59818	-0.878831	19.2083	4.80452e-05	0.00134103	-0.196601	13.5951	25.3633	0.00019904	0.000578507	0	0	TRUE	TRUE	TRUE	FALSE	FALSE	FALSE
chr1	13095357	13095491	135	*	mm10_rmsk	exon	591		B1_Mur1	B1_Mur1_dup98	Alu	SINE	26519	RP24-178B14.1	ENSMUST00000187394.1	intergenic	intergenic	intergenic	-1.18277	-1.6429	8.85425	0.00421306	0.0415524	-0.179663	13.0741	14.4372	0.00205038	0.00424761	0	0	FALSE	FALSE	FALSE	FALSE	FALSE	FALSE
chr1	13095567	13095686	120	*	mm10_rmsk	exon	516		B1_Mus1	B1_Mus1_dup299	Alu	SINE	26729	RP24-178B14.1	ENSMUST00000187394.1	intergenic	intergenic	intergenic	-1.20501	-1.48695	10.2132	0.00222698	0.0262484	-0.146129	14.2108	8.59991	0.011203	0.0196492	0	0	TRUE	FALSE	TRUE	FALSE	FALSE	FALSE
chr1	13104622	13104707	86	*	mm10_rmsk	exon	335		PB1	PB1_dup33	Alu	SINE	-22456	Prdm14	ENSMUST00000047577.6	intergenic	intergenic	intergenic	-1.43773	-1.45578	15.2187	0.000245113	0.00485388	-0.205657	11.1561	26.6413	0.000158719	0.000477294	0	0	FALSE	FALSE	FALSE	FALSE	FALSE	FALSE
chr1	13104821	13104959	139	*	mm10_rmsk	exon	378		B1F1	B1F1_dup55	Alu	SINE	-22204	Prdm14	ENSMUST00000047577.6	intergenic	intergenic	intergenic	-1.23476	-1.11131	13.6112	0.000487201	0.00830578	-0.20613	12.0803	22.9816	0.000310097	0.000836142	0	0	FALSE	FALSE	FALSE	FALSE	FALSE	TRUE
chr1	13108649	13108756	108	*	mm10_rmsk	exon	301		B1F1	B1F1_dup56	Alu	SINE	-18407	Prdm14	ENSMUST00000047577.6	intergenic	intergenic	intergenic	-1.04884	-0.886996	11.7196	0.00112157	0.015748	-0.20613	12.0803	22.9816	0.000310097	0.000836142	0	0	FALSE	FALSE	FALSE	FALSE	FALSE	FALSE
chr1	13108766	13108906	141	*	mm10_rmsk	exon	635		B1_Mur2	B1_Mur2_dup97	Alu	SINE	-18257	Prdm14	ENSMUST00000047577.6	intergenic	intergenic	intergenic	-1.1663	0.896557	23.8885	7.99628e-06	0.000330009	-0.133884	12.7428	10.2743	0.00656262	0.0121381	0	0	TRUE	TRUE	TRUE	FALSE	FALSE	FALSE
chr1	13121752	13121856	105	*	mm10_rmsk	exon	451		B1_Mus2	B1_Mus2_dup221	Alu	SINE	-5307	Prdm14	ENSMUST00000047577.6	intronic	intronic	gene_body	-1.36701	1.07402	25.4707	4.47388e-06	0.000211055	-0.176162	13.8323	10.0652	0.00699884	0.0128811	0	0	TRUE	TRUE	TRUE	FALSE	FALSE	FALSE
chr1	13121984	13122132	149	*	mm10_rmsk	exon	287		MER112	MER112_dup1	hAT-Charlie	DNA	-5031	Prdm14	ENSMUST00000047577.6	intronic	intronic	gene_body	-1.63359	-1.10718	20.018	3.493e-05	0.00104184	0.0273787	5.75126	0.254004	0.62234	0.664503	6.20039e-34	9.61104e-34	FALSE	FALSE	FALSE	FALSE	FALSE	FALSE
chr1	13124767	13124881	115	*	mm10_rmsk	exon	321		MIRc	MIRc_dup30	MIR	SINE	-2282	Prdm14	ENSMUST00000047577.6	intronic	intronic	gene_body	-1.29168	-0.607722	18.6552	5.98675e-05	0.00159487	-0.193248	12.2077	46.807	9.39595e-06	5.20085e-05	0	0	TRUE	TRUE	TRUE	FALSE	TRUE	FALSE
chr1	13128878	13128971	94	*	mm10_rmsk	exon	306		PB1D10	PB1D10_dup195	Alu	SINE	1715	Prdm14	ENSMUST00000047577.6	intergenic	intergenic	intergenic	-1.58075	-1.1849	19.3757	4.49677e-05	0.00127186	-0.196601	13.5951	25.3633	0.00019904	0.000578507	0	0	FALSE	FALSE	FALSE	FALSE	FALSE	FALSE
chr1	13161339	13161455	117	*	mm10_rmsk	exon	414		ID_B1	ID_B1_dup262	B4	SINE	10321	Ncoa2	ENSMUST00000133232.1	intronic	intronic	gene_body	-3.49233	-2.82578	14.307	0.000361045	0.00657393	-0.175808	14.6041	23.3246	0.000290382	0.000788684	0	0	FALSE	FALSE	FALSE	FALSE	FALSE	FALSE
chr1	13234811	13235102	292	*	mm10_rmsk	exon	1320		MTD	MTD_dup189	ERVL-MaLR	LTR	-1332	RP23-93D12.1	ENSMUST00000195811.1	exonic	exonic	gene_body	-1.5623	-1.70477	14.0462	0.00040379	0.00717664	-0.128328	13.8494	24.9898	0.000212962	0.000611037	0	0	FALSE	FALSE	TRUE	FALSE	FALSE	FALSE
chr1	13323083	13323218	136	*	mm10_rmsk	exon	756		B1_Mur2	B1_Mur2_dup103	Alu	SINE	-11391	Gm23169	ENSMUST00000157157.1	intronic	intronic	gene_body	-2.02984	-2.43398	11.0313	0.00153045	0.0198645	-0.133884	12.7428	10.2743	0.00656262	0.0121381	0	0	FALSE	FALSE	FALSE	FALSE	FALSE	FALSE
chr1	13360652	13361008	357	*	mm10_rmsk	exon	396		RLTR12BD_Mm	RLTR12BD_Mm_dup6	ERVK	LTR	3922	RP23-125I14.1	ENSMUST00000195718.1	intronic	intronic	gene_body	-1.15309	2.08292	22.5278	1.33071e-05	0.000488928	-0.369838	8.52753	44.5504	1.22294e-05	6.25806e-05	2.24669e-294	1.00346e-293	TRUE	TRUE	TRUE	TRUE	FALSE	TRUE
chr1	13375135	13375336	202	*	mm10_rmsk	exon	341		MIRb	MIRb_dup70	MIR	SINE	-734	RP23-125I14.5	ENSMUST00000185813.1	intergenic	proximal <=1000bp	Tss_prox_1kbp	-1.20226	-0.869382	12.8364	0.000683145	0.0107867	-0.165951	13.1579	40.2205	2.09103e-05	9.5896e-05	0	0	FALSE	FALSE	FALSE	FALSE	FALSE	TRUE
chr1	13401725	13402050	326	*	mm10_rmsk	exon	1092		RMER5	RMER5_dup32	ERV1	LTR	-5605	RP23-125I14.6	ENSMUST00000187246.1	intergenic	intergenic	intergenic	-1.62687	-1.08869	19.076	5.06322e-05	0.00139823	-0.0928129	11.0315	12.5981	0.0033416	0.00657162	0	0	FALSE	FALSE	FALSE	FALSE	FALSE	FALSE
chr1	13402051	13402142	92	*	mm10_rmsk	exon	376		B1F2	B1F2_dup48	Alu	SINE	-5513	RP23-125I14.6	ENSMUST00000187246.1	intergenic	intergenic	intergenic	-1.15371	-1.47255	8.38624	0.00527152	0.0486389	-0.209237	11.7791	21.8106	0.000389999	0.00100381	0	0	FALSE	FALSE	FALSE	FALSE	FALSE	FALSE
chr1	13411038	13411377	340	*	mm10_rmsk	exon	570		L1MA4A	L1MA4A_dup12	L1	LINE	3383	RP23-125I14.6	ENSMUST00000187246.1	intergenic	intergenic	intergenic	-1.78503	0.656304	54.446	5.71612e-10	5.1703e-07	0.311256	8.72758	54.8248	3.97109e-06	2.83312e-05	1.79236e-163	5.38662e-163	TRUE	TRUE	TRUE	FALSE	FALSE	FALSE
chr1	13411394	13411760	367	*	mm10_rmsk	exon	1141		MTEa	MTEa_dup70	ERVL-MaLR	LTR	3739	RP23-125I14.6	ENSMUST00000187246.1	intergenic	intergenic	intergenic	-2.34286	-0.0951028	70.8609	9.69553e-12	6.38872e-08	-0.2922	12.679	58.9166	2.66017e-06	2.14153e-05	0	0	TRUE	FALSE	FALSE	FALSE	FALSE	FALSE
chr1	13426747	13426863	117	*	mm10_rmsk	exon	463		ID_B1	ID_B1_dup281	B4	SINE	19092	RP23-125I14.6	ENSMUST00000187246.1	intergenic	intergenic	intergenic	-1.97566	1.49828	63.0727	6.25536e-11	1.58681e-07	-0.175808	14.6041	23.3246	0.000290382	0.000788684	0	0	TRUE	TRUE	TRUE	FALSE	FALSE	TRUE
chr1	13427019	13427167	149	*	mm10_rmsk	exon	481		RSINE1	RSINE1_dup279	B4	SINE	19364	RP23-125I14.6	ENSMUST00000187246.1	intergenic	intergenic	intergenic	-1.58364	1.27975	43.2339	1.33297e-08	3.43017e-06	0.0578688	14.2698	3.88326	0.0694883	0.0999452	0	0	TRUE	TRUE	TRUE	FALSE	FALSE	TRUE
chr1	13427176	13427285	110	*	mm10_rmsk	exon	306		PB1	PB1_dup35	Alu	SINE	19521	RP23-125I14.6	ENSMUST00000187246.1	intergenic	intergenic	intergenic	-1.49135	1.00432	38.9849	4.83326e-08	8.00868e-06	-0.205657	11.1561	26.6413	0.000158719	0.000477294	0	0	TRUE	TRUE	TRUE	FALSE	FALSE	TRUE
chr1	13427420	13427655	236	*	mm10_rmsk	exon	554		B4A	B4A_dup252	B4	SINE	19765	RP23-125I14.6	ENSMUST00000187246.1	intergenic	intergenic	intergenic	-1.41641	-0.0229508	29.2221	1.18242e-06	7.74645e-05	0.0753296	14.4644	7.74941	0.0149756	0.0252756	0	0	TRUE	FALSE	FALSE	FALSE	FALSE	FALSE
chr1	13429821	13430751	931	*	mm10_rmsk	exon	7664		L1_Mus1	L1_Mus1_dup195	L1	LINE	22166	RP23-125I14.6	ENSMUST00000187246.1	intergenic	intergenic	intergenic	1.48852	-2.07929	10.212	0.0022282	0.0262593	0.568501	13.4728	115.916	4.95501e-08	3.05101e-06	0	0	FALSE	FALSE	FALSE	FALSE	FALSE	FALSE
chr1	13458686	13459680	995	*	mm10_rmsk	exon	2480		RLTR1B-int	RLTR1B-int_dup9	ERV1	LTR	51031	RP23-125I14.6	ENSMUST00000187246.1	intergenic	intergenic	intergenic	1.22562	-1.41499	11.5349	0.00121862	0.0167545	0.389165	8.57882	67.615	1.21903e-06	1.22598e-05	3.10425e-165	9.37916e-165	FALSE	FALSE	FALSE	FALSE	FALSE	FALSE
chr1	13459689	13459943	255	*	mm10_rmsk	exon	1334		L1VL1	L1VL1_dup32	L1	LINE	52034	RP23-125I14.6	ENSMUST00000187246.1	intergenic	intergenic	intergenic	1.61375	-2.27978	9.46094	0.00316201	0.0338984	0.408941	9.79875	95.693	1.58574e-07	3.87825e-06	0	0	FALSE	FALSE	FALSE	FALSE	FALSE	FALSE
chr1	13469314	13469504	191	*	mm10_rmsk	exon	1510		B2_Mm2	B2_Mm2_dup261	B2	SINE	61659	RP23-125I14.6	ENSMUST00000187246.1	intergenic	intergenic	intergenic	3.29367	-2.83626	13.2733	0.000564274	0.00931056	0.10167	14.026	5.41603	0.0359684	0.0559787	0	0	FALSE	FALSE	FALSE	FALSE	FALSE	FALSE
chr1	13488229	13488341	113	*	mm10_rmsk	exon	203		MIR	MIR_dup52	MIR	SINE	80574	RP23-125I14.6	ENSMUST00000187246.1	intergenic	intergenic	intergenic	-1.52766	0.538703	37.7652	7.07163e-08	1.03849e-05	-0.0763741	12.8857	8.72251	0.0107557	0.0189413	0	0	TRUE	TRUE	TRUE	FALSE	FALSE	FALSE
chr1	13504280	13506800	2521	*	mm10_rmsk	exon	9851		Lx5	Lx5_dup77	L1	LINE	-72998	Tram1	ENSMUST00000185447.1	intergenic	intergenic	intergenic	1.14384	-0.816149	14.116	0.000391853	0.0070124	0.344861	12.7349	51.5136	5.59317e-06	3.66009e-05	0	0	FALSE	FALSE	FALSE	FALSE	FALSE	FALSE
chr1	13506812	13507204	393	*	mm10_rmsk	exon	2608		RLTR9D	RLTR9D_dup13	ERVK	LTR	-72594	Tram1	ENSMUST00000185447.1	intergenic	intergenic	intergenic	1.60336	-2.08393	11.5096	0.00123261	0.0168991	-0.0375755	8.30441	0.693781	0.419278	0.473911	5.0239e-244	1.92441e-243	FALSE	FALSE	FALSE	FALSE	FALSE	FALSE
chr1	13530742	13530836	95	*	mm10_rmsk	exon	293		Plat_L3	Plat_L3_dup1	CR1	LINE	-48962	Tram1	ENSMUST00000185447.1	intergenic	intergenic	intergenic	-1.53418	-1.32593	16.9539	0.000119156	0.00274933	-0.206963	6.70756	12.4868	0.00344598	0.00676499	5.24219e-94	1.18949e-93	FALSE	FALSE	FALSE	FALSE	FALSE	FALSE
chr1	13530918	13531075	158	*	mm10_rmsk	exon	676		Tigger16a	Tigger16a_dup3	TcMar-Tigger	DNA	-48723	Tram1	ENSMUST00000185447.1	intergenic	intergenic	intergenic	-1.95026	-0.404282	43.0087	1.42511e-08	3.57011e-06	-0.469916	6.39252	55.8369	3.58841e-06	2.64173e-05	1.25031e-81	2.68603e-81	TRUE	FALSE	TRUE	FALSE	FALSE	TRUE
chr1	13531259	13531408	150	*	mm10_rmsk	exon	452		B1F	B1F_dup147	Alu	SINE	-48390	Tram1	ENSMUST00000185447.1	intergenic	intergenic	intergenic	-1.71981	0.194253	42.0985	1.87021e-08	4.27851e-06	-0.210784	13.2074	26.2569	0.000169765	0.00050658	0	0	TRUE	FALSE	TRUE	FALSE	FALSE	FALSE
chr1	13535030	13535127	98	*	mm10_rmsk	exon	411		RSINE1	RSINE1_dup283	B4	SINE	-44671	Tram1	ENSMUST00000185447.1	intergenic	intergenic	intergenic	-1.15943	-0.595498	13.909	0.000428369	0.00751556	0.0578688	14.2698	3.88326	0.0694883	0.0999452	0	0	TRUE	FALSE	TRUE	FALSE	FALSE	TRUE
chr1	13535217	13535405	189	*	mm10_rmsk	exon	306		RMER15	RMER15_dup61	ERVL	LTR	-44393	Tram1	ENSMUST00000185447.1	intergenic	intergenic	intergenic	-1.3046	0.15006	26.0638	3.60974e-06	0.000178931	-0.386955	12.6786	57.0863	3.17301e-06	2.43192e-05	0	0	TRUE	TRUE	TRUE	FALSE	FALSE	FALSE
chr1	13590296	13590414	119	*	mm10_rmsk	exon	274		ID_B1	ID_B1_dup284	B4	SINE	386	Tram1	ENSMUST00000027068.10	intergenic	proximal <=1000bp	Tss_prox_1kbp	-1.26464	1.18795	27.535	2.13453e-06	0.000120119	-0.175808	14.6041	23.3246	0.000290382	0.000788684	0	0	TRUE	FALSE	FALSE	TRUE	FALSE	TRUE
chr1	13590330	13590445	116	*	mm10_rmsk	exon	438		PB1D7	PB1D7_dup66	Alu	SINE	420	Tram1	ENSMUST00000027068.10	intergenic	proximal <=1000bp	Tss_prox_1kbp	-1.36996	0.871287	30.8328	6.80389e-07	5.16647e-05	-0.319159	12.459	36.3072	3.53263e-05	0.000141179	0	0	TRUE	FALSE	FALSE	TRUE	FALSE	TRUE
chr1	13592847	13592965	119	*	mm10_rmsk	exon	348		PB1D9	PB1D9_dup84	Alu	SINE	2937	Tram1	ENSMUST00000027068.10	intergenic	intergenic	intergenic	2.19091	-2.73052	9.01677	0.00389981	0.0393532	-0.245535	12.562	18.2067	0.000833525	0.00193109	0	0	FALSE	FALSE	FALSE	FALSE	FALSE	FALSE
chr1	13594788	13595686	899	*	mm10_rmsk	exon	2925		MTE2b-int	MTE2b-int_dup11	ERVL-MaLR	LTR	4878	Tram1	ENSMUST00000027068.10	intergenic	intergenic	intergenic	1.46537	-1.95381	9.9859	0.00247433	0.02837	0.189526	7.67328	37.571	2.96892e-05	0.000124428	6.98733e-115	1.76637e-114	FALSE	FALSE	FALSE	FALSE	FALSE	FALSE
chr1	13605811	13606189	379	*	mm10_rmsk	exon	704		ORR1F	ORR1F_dup115	ERVL-MaLR	LTR	15901	Tram1	ENSMUST00000027068.10	intergenic	intergenic	intergenic	1.7399	-2.30824	10.7399	0.00174798	0.0219281	-0.0391757	12.46	2.04136	0.175651	0.223356	0	0	FALSE	FALSE	FALSE	FALSE	FALSE	FALSE
chr1	13621066	13621966	901	*	mm10_rmsk	exon	14087		MMERVK9C_I-int	MMERVK9C_I-int_dup9	ERVK	LTR	-16445	Lactb2	ENSMUST00000156222.1	intergenic	intergenic	intergenic	-1.1678	0.547472	20.6087	2.77469e-05	0.000870284	-0.179867	10.0272	8.76041	0.0107656	0.0189413	0	0	TRUE	FALSE	TRUE	FALSE	FALSE	FALSE
chr1	13621969	13622375	407	*	mm10_rmsk	exon	2598		ERVB7_3-LTR_MM	ERVB7_3-LTR_MM_dup5	ERVK	LTR	-16036	Lactb2	ENSMUST00000156222.1	intergenic	intergenic	intergenic	-1.14638	-0.0182881	19.4814	4.31299e-05	0.00122999	-0.118768	6.67973	6.00704	0.0284491	0.0451555	3.72182e-80	7.9352e-80	TRUE	FALSE	TRUE	FALSE	FALSE	FALSE
chr1	13622383	13622452	70	*	mm10_rmsk	exon	251		Tigger7	Tigger7_dup28	TcMar-Tigger	DNA	-15959	Lactb2	ENSMUST00000156222.1	intergenic	intergenic	intergenic	-1.47345	-1.80614	11.6582	0.0011529	0.0160747	0.0408745	10.0307	2.82424	0.115677	0.156757	0	0	FALSE	FALSE	FALSE	FALSE	FALSE	FALSE
chr1	13659448	13659610	163	*	mm10_rmsk	exon	429		MamRep137	MamRep137_dup1	TcMar-Tigger	DNA	-936	Lactb2	ENSMUST00000027071.6	intronic	proximal <=1000bp	Tss_prox_1kbp	-1.08343	-0.796108	10.7898	0.00170852	0.021554	-0.200727	6.2315	22.8521	0.000317938	0.000851131	3.2774e-49	5.79572e-49	TRUE	FALSE	TRUE	FALSE	FALSE	TRUE
chr1	13695807	13696115	309	*	mm10_rmsk	exon	1666		Lx	Lx_dup131	L1	LINE	27036	Xkr9	ENSMUST00000088542.3	intronic	intronic	gene_body	1.40619	-2.15389	8.56513	0.00483729	0.0458073	0.402447	13.336	70.3906	9.67384e-07	1.0572e-05	0	0	FALSE	FALSE	FALSE	FALSE	FALSE	FALSE
chr1	13789802	13789914	113	*	mm10_rmsk	exon	470		B3A	B3A_dup259	B2	SINE	2923	RP23-70F22.1	ENSMUST00000180415.1	intergenic	intergenic	intergenic	-1.93008	-0.621073	41.3532	2.34085e-08	4.94266e-06	-0.0693289	14.2699	6.57714	0.0228853	0.0371879	0	0	TRUE	FALSE	TRUE	FALSE	FALSE	TRUE
chr1	13792819	13795282	2464	*	mm10_rmsk	exon	28412		Lx	Lx_dup134	L1	LINE	5940	RP23-70F22.1	ENSMUST00000180415.1	intergenic	intergenic	intergenic	1.47054	-1.41292	16.3175	0.000154879	0.00337919	0.402447	13.336	70.3906	9.67384e-07	1.0572e-05	0	0	FALSE	FALSE	FALSE	FALSE	FALSE	FALSE
chr1	13833364	13833857	494	*	mm10_rmsk	exon	2506		Lx7	Lx7_dup233	L1	LINE	-15262	RP23-74B7.1	ENSMUST00000194709.1	intergenic	intergenic	intergenic	1.45885	-2.0988	10.211	0.00222922	0.0262696	0.295529	13.1367	105.492	8.80305e-08	3.05101e-06	0	0	FALSE	FALSE	FALSE	FALSE	FALSE	FALSE
chr1	13839750	13839943	194	*	mm10_rmsk	exon	1167		B3	B3_dup423	B2	SINE	-9176	RP23-74B7.1	ENSMUST00000194709.1	intergenic	intergenic	intergenic	-1.7294	0.27885	41.917	1.97501e-08	4.42435e-06	-0.0408682	15.0047	1.97967	0.18188	0.229711	0	0	TRUE	TRUE	TRUE	FALSE	FALSE	FALSE
chr1	13843289	13843582	294	*	mm10_rmsk	exon	670		MLT1E3	MLT1E3_dup9	ERVL-MaLR	LTR	-5537	RP23-74B7.1	ENSMUST00000194709.1	intergenic	intergenic	intergenic	-1.12252	-0.438443	15.5501	0.000213232	0.00434807	-0.0272091	8.00999	0.647335	0.434916	0.489117	5.50828e-125	1.43089e-124	TRUE	FALSE	TRUE	FALSE	FALSE	FALSE
chr1	13874529	13876682	2154	*	mm10_rmsk	exon	11041		MusHAL1	MusHAL1_dup32	L1	LINE	25410	RP23-74B7.1	ENSMUST00000194709.1	intergenic	intergenic	intergenic	1.34995	-1.52884	11.7473	0.00110773	0.0155968	0.264879	9.88329	46.9413	9.25267e-06	5.17687e-05	0	0	FALSE	FALSE	FALSE	FALSE	FALSE	FALSE
chr1	13882160	13882443	284	*	mm10_rmsk	exon	343		L1MB2	L1MB2_dup11	L1	LINE	33041	RP23-74B7.1	ENSMUST00000194709.1	intergenic	intergenic	intergenic	-1.1092	1.94121	20.0621	3.43327e-05	0.00102801	-0.0617482	9.38574	2.77714	0.118487	0.159168	0	0	TRUE	TRUE	TRUE	FALSE	FALSE	FALSE
chr1	13882452	13882564	113	*	mm10_rmsk	exon	408		PB1D10	PB1D10_dup212	Alu	SINE	33333	RP23-74B7.1	ENSMUST00000194709.1	intergenic	intergenic	intergenic	-1.0416	-1.37853	8.59457	0.0047695	0.0453496	-0.196601	13.5951	25.3633	0.00019904	0.000578507	0	0	FALSE	FALSE	FALSE	FALSE	FALSE	FALSE
chr1	13900607	13901005	399	*	mm10_rmsk	exon	1916		Lx9	Lx9_dup224	L1	LINE	-31373	Gm25491	ENSMUST00000158733.1	intergenic	intergenic	intergenic	1.85694	-2.58504	9.59363	0.00297118	0.0324044	0.366266	13.1834	126.776	2.85574e-08	2.45813e-06	0	0	FALSE	FALSE	FALSE	FALSE	FALSE	FALSE
chr1	13914612	13914829	218	*	mm10_rmsk	exon	670		MTEa	MTEa_dup75	ERVL-MaLR	LTR	-17549	Gm25491	ENSMUST00000158733.1	intergenic	intergenic	intergenic	-1.19532	-1.1477	12.356	0.000844479	0.0126838	-0.2922	12.679	58.9166	2.66017e-06	2.14153e-05	0	0	FALSE	FALSE	FALSE	FALSE	FALSE	FALSE
chr1	13937159	13937307	149	*	mm10_rmsk	exon	964		B1_Mur4	B1_Mur4_dup113	Alu	SINE	4781	Gm25491	ENSMUST00000158733.1	intergenic	intergenic	intergenic	-1.00722	-0.0869855	12.8097	0.000691209	0.0108842	-0.197949	13.0761	16.1554	0.00133973	0.00293351	0	0	TRUE	TRUE	TRUE	FALSE	FALSE	FALSE
chr1	13937396	13937415	20	*	mm10_rmsk	exon	358		B4	B4_dup170	B4	SINE	5018	Gm25491	ENSMUST00000158733.1	intergenic	intergenic	intergenic	-1.52223	-0.498882	25.2743	4.80505e-06	0.000222842	0.0559679	13.6316	3.88846	0.0693232	0.0998362	0	0	TRUE	TRUE	TRUE	FALSE	FALSE	FALSE
chr1	13937416	13937507	92	*	mm10_rmsk	exon	618		PB1D9	PB1D9_dup88	Alu	SINE	5038	Gm25491	ENSMUST00000158733.1	intergenic	intergenic	intergenic	-1.4957	-0.223526	26.8013	2.77049e-06	0.000146161	-0.245535	12.562	18.2067	0.000833525	0.00193109	0	0	TRUE	TRUE	TRUE	FALSE	FALSE	FALSE
chr1	13940628	13940810	183	*	mm10_rmsk	exon	611		RMER17A-int	RMER17A-int_dup9	ERVK	LTR	8250	Gm25491	ENSMUST00000158733.1	intergenic	intergenic	intergenic	-1.84932	-2.22504	12.047	0.000968794	0.0140861	-0.416976	7.52375	72.3081	8.28274e-07	9.69813e-06	5.22056e-199	1.73507e-198	FALSE	FALSE	FALSE	FALSE	FALSE	FALSE
chr1	13964090	13966004	1915	*	mm10_rmsk	exon	14453		L1_Mus3	L1_Mus3_dup348	L1	LINE	31712	Gm25491	ENSMUST00000158733.1	intergenic	intergenic	intergenic	1.17099	-1.8299	8.35352	0.00535524	0.0491832	0.491166	14.0232	104.073	9.55672e-08	3.14529e-06	0	0	FALSE	FALSE	FALSE	FALSE	FALSE	FALSE
chr1	14028021	14034487	6467	*	mm10_rmsk	exon	33404		L1Md_F2	L1Md_F2_dup383	L1	LINE	-78332	RP24-335B5.1	ENSMUST00000193148.1	intergenic	intergenic	intergenic	1.05481	-0.0821345	14.8467	0.000286872	0.00548854	0.519061	15.1429	139.838	1.55383e-08	1.93193e-06	0	0	FALSE	FALSE	FALSE	FALSE	FALSE	FALSE
chr1	14080941	14082810	1870	*	mm10_rmsk	exon	16486		L1Md_F2	L1Md_F2_dup387	L1	LINE	-30009	RP24-335B5.1	ENSMUST00000193148.1	intergenic	intergenic	intergenic	1.09785	-1.51329	8.46339	0.00507944	0.047388	0.519061	15.1429	139.838	1.55383e-08	1.93193e-06	0	0	FALSE	FALSE	FALSE	FALSE	FALSE	FALSE
chr1	14092031	14093034	1004	*	mm10_rmsk	exon	8727		L1Md_F2	L1Md_F2_dup390	L1	LINE	-19785	RP24-335B5.1	ENSMUST00000193148.1	intergenic	intergenic	intergenic	1.63274	-1.72036	15.571	0.000211371	0.0043167	0.519061	15.1429	139.838	1.55383e-08	1.93193e-06	0	0	FALSE	FALSE	FALSE	FALSE	FALSE	FALSE
chr1	14132686	14133548	863	*	mm10_rmsk	exon	5515		RMER17B	RMER17B_dup23	ERVK	LTR	19867	RP24-335B5.1	ENSMUST00000193148.1	intergenic	intergenic	intergenic	-1.07196	0.332772	20.1678	3.29428e-05	0.000995362	-0.640441	12.3098	31.6377	0.000180857	0.000533981	0	0	TRUE	TRUE	TRUE	FALSE	FALSE	FALSE
chr1	14156005	14156342	338	*	mm10_rmsk	exon	2632		RLTRETN_Mm	RLTRETN_Mm_dup21	ERVK	LTR	-26236	Gm22616	ENSMUST00000179783.1	intergenic	intergenic	intergenic	-1.74583	-1.2662	21.8556	1.71749e-05	0.000596502	-0.536374	9.3262	60.9698	2.73033e-06	2.18231e-05	0	0	TRUE	FALSE	TRUE	FALSE	FALSE	FALSE
chr1	14372177	14372797	621	*	mm10_rmsk	exon	4703		Lx2	Lx2_dup113	L1	LINE	61942	Eya1	ENSMUST00000168081.8	intergenic	intergenic	intergenic	1.47539	-1.90305	11.9456	0.00101368	0.014585	0.329614	12.88	47.1621	9.02254e-06	5.15113e-05	0	0	FALSE	FALSE	FALSE	FALSE	FALSE	FALSE
chr1	14405423	14405650	228	*	mm10_rmsk	exon	765		RLTR12B	RLTR12B_dup6	ERVK	LTR	95188	Eya1	ENSMUST00000168081.8	intergenic	intergenic	intergenic	-1.48871	-1.17651	16.6994	0.000132285	0.00298593	-0.598405	8.81141	62.0874	3.00054e-06	2.36451e-05	2.5015e-297	1.12617e-296	FALSE	FALSE	FALSE	FALSE	FALSE	FALSE
chr1	14409685	14410250	566	*	mm10_rmsk	exon	4677		L1_Mus1	L1_Mus1_dup205	L1	LINE	99450	Eya1	ENSMUST00000168081.8	intergenic	intergenic	intergenic	2.28086	-1.98828	20.7177	2.65983e-05	0.000841638	0.568501	13.4728	115.916	4.95501e-08	3.05101e-06	0	0	FALSE	FALSE	FALSE	FALSE	FALSE	FALSE
chr1	14473977	14474015	39	*	mm10_rmsk	exon	283		B2_Mm2	B2_Mm2_dup271	B2	SINE	163742	Eya1	ENSMUST00000168081.8	intergenic	intergenic	intergenic	-1.49307	-2.19453	8.46415	0.00507758	0.0473765	0.10167	14.026	5.41603	0.0359684	0.0559787	0	0	FALSE	FALSE	TRUE	FALSE	FALSE	FALSE
chr1	14530505	14531333	829	*	mm10_rmsk	exon	4752		L1Md_F2	L1Md_F2_dup397	L1	LINE	220270	Eya1	ENSMUST00000168081.8	intergenic	intergenic	intergenic	1.28193	-1.88693	8.60149	0.00475372	0.0452412	0.519061	15.1429	139.838	1.55383e-08	1.93193e-06	0	0	FALSE	FALSE	FALSE	FALSE	FALSE	FALSE
chr1	14531335	14531856	522	*	mm10_rmsk	exon	3919		L1Md_F2	L1Md_F2_dup398	L1	LINE	-221081	RP24-356G6.1	ENSMUST00000187401.1	intergenic	intergenic	intergenic	1.41494	-2.07073	8.91553	0.00409196	0.0407004	0.519061	15.1429	139.838	1.55383e-08	1.93193e-06	0	0	FALSE	FALSE	FALSE	FALSE	FALSE	FALSE
chr1	14607257	14607844	588	*	mm10_rmsk	exon	3333		L1Md_F2	L1Md_F2_dup400	L1	LINE	-145093	RP24-356G6.1	ENSMUST00000187401.1	intergenic	intergenic	intergenic	1.57262	-2.3308	8.68219	0.0045736	0.0440237	0.519061	15.1429	139.838	1.55383e-08	1.93193e-06	0	0	FALSE	FALSE	FALSE	FALSE	FALSE	FALSE
chr1	14615894	14616249	356	*	mm10_rmsk	exon	2566		Lx	Lx_dup150	L1	LINE	-136688	RP24-356G6.1	ENSMUST00000187401.1	intergenic	intergenic	intergenic	-1.67676	0.528355	40.5835	2.95699e-08	5.76149e-06	0.402447	13.336	70.3906	9.67384e-07	1.0572e-05	0	0	TRUE	FALSE	TRUE	FALSE	FALSE	FALSE
chr1	14616250	14616633	384	*	mm10_rmsk	exon	1911		RLTR41	RLTR41_dup10	ERV1	LTR	-136304	RP24-356G6.1	ENSMUST00000187401.1	intergenic	intergenic	intergenic	-1.66272	1.52565	44.1055	1.0305e-08	2.91035e-06	-0.261583	9.03222	23.3614	0.000288351	0.000785072	0	0	TRUE	TRUE	TRUE	FALSE	FALSE	FALSE
chr1	14616634	14616665	32	*	mm10_rmsk	exon	272		MTE2b	MTE2b_dup53	ERVL-MaLR	LTR	-136272	RP24-356G6.1	ENSMUST00000187401.1	intergenic	intergenic	intergenic	-2.15202	-1.23523	31.8535	4.8198e-07	4.01247e-05	-0.265936	12.1834	46.9875	9.20397e-06	5.1755e-05	0	0	FALSE	FALSE	FALSE	FALSE	FALSE	FALSE
chr1	14625160	14625752	593	*	mm10_rmsk	exon	2490		Lx7	Lx7_dup243	L1	LINE	-127185	RP24-356G6.1	ENSMUST00000187401.1	intergenic	intergenic	intergenic	1.4889	-2.09891	10.0707	0.00237889	0.0275594	0.295529	13.1367	105.492	8.80305e-08	3.05101e-06	0	0	FALSE	FALSE	FALSE	FALSE	FALSE	FALSE
chr1	14696874	14697170	297	*	mm10_rmsk	exon	2546		IAP1-MM_LTR	IAP1-MM_LTR_dup4	ERVK	LTR	-55767	RP24-356G6.1	ENSMUST00000187401.1	intergenic	intergenic	intergenic	-1.11151	-0.630666	15.4043	0.000226693	0.00456243	-0.90342	10.3418	11.3102	0.00753242	0.01375	0	0	TRUE	TRUE	TRUE	FALSE	FALSE	TRUE
chr1	14706265	14706449	185	*	mm10_rmsk	exon	625		B3A	B3A_dup274	B2	SINE	-46488	RP24-356G6.1	ENSMUST00000187401.1	intergenic	intergenic	intergenic	-1.3352	-1.66983	9.82272	0.00266953	0.0299805	-0.0693289	14.2699	6.57714	0.0228853	0.0371879	0	0	TRUE	FALSE	TRUE	FALSE	FALSE	FALSE
chr1	14725516	14726798	1283	*	mm10_rmsk	exon	24041		L1_Mus4	L1_Mus4_dup78	L1	LINE	-26139	RP24-356G6.1	ENSMUST00000187401.1	intergenic	intergenic	intergenic	1.50295	-1.35528	18.6862	5.91308e-05	0.00157915	0.534569	12.2714	89.1906	2.41524e-07	5.00491e-06	0	0	FALSE	FALSE	FALSE	FALSE	FALSE	FALSE
chr1	14733845	14734782	938	*	mm10_rmsk	exon	4556		RLTR13D6	RLTR13D6_dup6	ERVK	LTR	-18155	RP24-356G6.1	ENSMUST00000187401.1	intergenic	intergenic	intergenic	-1.0575	-0.199324	16.2181	0.000161391	0.00349037	-0.111619	9.0145	5.09865	0.0409629	0.0627051	2.61909e-233	9.7035e-233	TRUE	FALSE	TRUE	FALSE	FALSE	FALSE
chr1	14745812	14746054	243	*	mm10_rmsk	exon	692		L1MA4	L1MA4_dup41	L1	LINE	-6883	RP24-356G6.1	ENSMUST00000187401.1	intergenic	intergenic	intergenic	1.62362	-2.48143	8.42341	0.00517802	0.0480342	0.349661	10.1406	73.2471	7.68617e-07	9.34872e-06	0	0	FALSE	FALSE	FALSE	FALSE	FALSE	FALSE
chr1	14788457	14788682	226	*	mm10_rmsk	exon	534		RMER15	RMER15_dup65	ERVL	LTR	0	RP23-398C14.1	ENSMUST00000194866.1	exonic	TSS	Tss_prox_1kbp	-1.44788	-1.17592	16.3492	0.000152856	0.00334498	-0.386955	12.6786	57.0863	3.17301e-06	2.43192e-05	0	0	FALSE	FALSE	FALSE	FALSE	FALSE	FALSE
chr1	14794175	14794293	119	*	mm10_rmsk	exon	392		B4	B4_dup187	B4	SINE	5530	RP23-398C14.1	ENSMUST00000194866.1	intergenic	intergenic	intergenic	-1.37086	-1.88082	8.46873	0.00506642	0.0472991	0.0559679	13.6316	3.88846	0.0693232	0.0998362	0	0	FALSE	FALSE	FALSE	FALSE	FALSE	FALSE
chr1	14805867	14809283	3417	*	mm10_rmsk	exon	28951		L1_Mus2	L1_Mus2_dup144	L1	LINE	17222	RP23-398C14.1	ENSMUST00000194866.1	intergenic	intergenic	intergenic	1.03304	-0.962116	11.1019	0.00148213	0.0193956	0.484439	13.0175	105.113	8.99763e-08	3.05101e-06	0	0	FALSE	FALSE	FALSE	FALSE	FALSE	FALSE
chr1	14840381	14840786	406	*	mm10_rmsk	exon	2348		MTC	MTC_dup141	ERVL-MaLR	LTR	225	Smt3h2-ps4	ENSMUST00000121569.1	intergenic	proximal <=1000bp	Tss_prox_1kbp	-1.19674	-0.271033	20.4584	2.94155e-05	0.000910636	-0.0712501	12.9646	7.63021	0.0156148	0.0261341	0	0	FALSE	FALSE	FALSE	FALSE	FALSE	FALSE
chr1	14919317	14919551	235	*	mm10_rmsk	exon	702		ID_B1	ID_B1_dup319	B4	SINE	455	Trpa1	ENSMUST00000041447.4	intergenic	proximal <=1000bp	Tss_prox_1kbp	-1.50762	0.23563	32.9516	3.34148e-07	3.07957e-05	-0.175808	14.6041	23.3246	0.000290382	0.000788684	0	0	TRUE	FALSE	TRUE	FALSE	FALSE	TRUE
chr1	14932321	14932420	100	*	mm10_rmsk	exon	388		PB1D7	PB1D7_dup75	Alu	SINE	13459	Trpa1	ENSMUST00000041447.4	intergenic	intergenic	intergenic	-1.27449	-1.25148	12.9983	0.000636299	0.0102221	-0.319159	12.459	36.3072	3.53263e-05	0.000141179	0	0	TRUE	FALSE	TRUE	FALSE	FALSE	FALSE
chr1	14952731	14953095	365	*	mm10_rmsk	exon	3058		L1Md_F2	L1Md_F2_dup408	L1	LINE	33869	Trpa1	ENSMUST00000041447.4	intergenic	intergenic	intergenic	-1.29191	-0.602331	17.8694	8.20917e-05	0.00205038	0.519061	15.1429	139.838	1.55383e-08	1.93193e-06	0	0	TRUE	TRUE	TRUE	FALSE	FALSE	FALSE
chr1	14966191	14966690	500	*	mm10_rmsk	exon	5491		MuRRS4-int	MuRRS4-int_dup18	ERV1	LTR	47329	Trpa1	ENSMUST00000041447.4	intergenic	intergenic	intergenic	2.15091	-2.39279	12.7273	0.000716742	0.0111903	0.551404	9.96514	33.2226	0.000119281	0.000378117	0	0	FALSE	FALSE	FALSE	FALSE	FALSE	FALSE
chr1	14966907	14968659	1753	*	mm10_rmsk	exon	5491		MuRRS4-int	MuRRS4-int_dup19	ERV1	LTR	48045	Trpa1	ENSMUST00000041447.4	intergenic	intergenic	intergenic	1.25197	-0.923484	14.512	0.000330762	0.00613801	0.551404	9.96514	33.2226	0.000119281	0.000378117	0	0	FALSE	FALSE	FALSE	FALSE	FALSE	FALSE
chr1	14979194	14980433	1240	*	mm10_rmsk	exon	5815		Lx5	Lx5_dup83	L1	LINE	-38726	Gm26345	ENSMUST00000157534.1	intergenic	intergenic	intergenic	1.79086	-1.56137	19.9106	3.64305e-05	0.00107658	0.344861	12.7349	51.5136	5.59317e-06	3.66009e-05	0	0	FALSE	FALSE	FALSE	FALSE	FALSE	FALSE
chr1	15064331	15066162	1832	*	mm10_rmsk	exon	9795		Lx	Lx_dup161	L1	LINE	45172	Gm26345	ENSMUST00000157534.1	intergenic	intergenic	intergenic	1.32173	-1.63684	11.1945	0.00142121	0.018805	0.402447	13.336	70.3906	9.67384e-07	1.0572e-05	0	0	FALSE	FALSE	FALSE	FALSE	FALSE	FALSE
chr1	15090617	15092073	1457	*	mm10_rmsk	exon	6102		L1_Mur3	L1_Mur3_dup210	L1	LINE	71458	Gm26345	ENSMUST00000157534.1	intergenic	intergenic	intergenic	-1.70281	-1.64063	13.7921	0.00045052	0.00781495	0.334543	12.3059	85.3852	3.12894e-07	5.33454e-06	0	0	TRUE	FALSE	TRUE	FALSE	FALSE	FALSE
chr1	15145553	15146196	644	*	mm10_rmsk	exon	2517		L1_Mur3	L1_Mur3_dup212	L1	LINE	-123601	RP23-143L15.1	ENSMUST00000086739.5	intergenic	intergenic	intergenic	-1.04784	0.808424	16.4082	0.000149173	0.00328144	0.334543	12.3059	85.3852	3.12894e-07	5.33454e-06	0	0	TRUE	TRUE	TRUE	FALSE	FALSE	FALSE
chr1	15152252	15152425	174	*	mm10_rmsk	exon	1228		B2_Mm1t	B2_Mm1t_dup109	B2	SINE	-117372	RP23-143L15.1	ENSMUST00000086739.5	intergenic	intergenic	intergenic	-1.4825	-1.49868	11.978	0.000999099	0.0144214	0.162653	12.0786	9.5898	0.00812187	0.0146351	0	0	TRUE	FALSE	TRUE	FALSE	FALSE	FALSE
chr1	15152790	15152818	29	*	mm10_rmsk	exon	1228		B2_Mm1t	B2_Mm1t_dup110	B2	SINE	-116979	RP23-143L15.1	ENSMUST00000086739.5	intergenic	intergenic	intergenic	-1.15376	-1.52176	9.49921	0.00310569	0.0334574	0.162653	12.0786	9.5898	0.00812187	0.0146351	0	0	FALSE	FALSE	FALSE	FALSE	FALSE	TRUE
chr1	15202182	15202702	521	*	mm10_rmsk	exon	2574		RMER4B	RMER4B_dup20	ERVK	LTR	-67095	RP23-143L15.1	ENSMUST00000086739.5	intergenic	intergenic	intergenic	-1.99497	-0.162133	51.2947	1.33939e-09	8.55208e-07	-0.0488324	10.4274	1.90913	0.189351	0.238339	0	0	TRUE	TRUE	TRUE	FALSE	FALSE	TRUE
chr1	15219517	15220101	585	*	mm10_rmsk	exon	2861		RLTR26	RLTR26_dup3	ERVK	LTR	-49696	RP23-143L15.1	ENSMUST00000086739.5	intergenic	intergenic	intergenic	-1.08757	0.42911	21.6821	1.83508e-05	0.000627364	-0.552908	8.27558	59.7488	2.8272e-06	2.24371e-05	9.78133e-234	3.6599e-233	TRUE	TRUE	TRUE	FALSE	FALSE	FALSE
chr1	15225496	15227023	1528	*	mm10_rmsk	exon	5022		L1_Mur3	L1_Mur3_dup214	L1	LINE	-42774	RP23-143L15.1	ENSMUST00000086739.5	intergenic	intergenic	intergenic	1.28301	-1.51596	11.3761	0.00130908	0.0176728	0.334543	12.3059	85.3852	3.12894e-07	5.33454e-06	0	0	FALSE	FALSE	FALSE	FALSE	FALSE	FALSE
chr1	15234495	15235351	857	*	mm10_rmsk	exon	2106		Lx3_Mus	Lx3_Mus_dup54	L1	LINE	-34446	RP23-143L15.1	ENSMUST00000086739.5	intergenic	intergenic	intergenic	1.42466	-1.86696	11.3468	0.00132652	0.0178476	0.490828	12.3525	77.1477	5.68276e-07	7.57815e-06	0	0	FALSE	FALSE	FALSE	FALSE	FALSE	FALSE
chr1	15244364	15247453	3090	*	mm10_rmsk	exon	17795		L1Md_F2	L1Md_F2_dup420	L1	LINE	-22344	RP23-143L15.1	ENSMUST00000086739.5	intergenic	intergenic	intergenic	1.07814	-1.04939	12.2656	0.000879018	0.0130784	0.519061	15.1429	139.838	1.55383e-08	1.93193e-06	0	0	FALSE	FALSE	FALSE	FALSE	FALSE	FALSE
chr1	15319072	15319134	63	*	mm10_rmsk	exon	254		B4	B4_dup193	B4	SINE	6620	Kcnb2	ENSMUST00000170146.2	intronic	intronic	gene_body	-1.88731	-2.02627	14.0159	0.000409098	0.00725354	0.0559679	13.6316	3.88846	0.0693232	0.0998362	0	0	TRUE	FALSE	TRUE	FALSE	FALSE	FALSE
chr1	15341925	15343357	1433	*	mm10_rmsk	exon	6788		L1_Mus3	L1_Mus3_dup389	L1	LINE	-20945	RP23-445B17.1	ENSMUST00000193873.1	intronic	intronic	gene_body	1.29758	-1.50746	10.6693	0.00180532	0.0224622	0.491166	14.0232	104.073	9.55672e-08	3.14529e-06	0	0	FALSE	FALSE	FALSE	FALSE	FALSE	TRUE
chr1	15366050	15366666	617	*	mm10_rmsk	exon	1068		RMER1C	RMER1C_dup27	RMER1C	Other	1748	RP23-445B17.1	ENSMUST00000193873.1	intronic	intronic	gene_body	1.25039	-1.62857	10.2123	0.00222784	0.0262559	0.152758	10.7003	10.9081	0.0054203	0.0101287	0	0	FALSE	FALSE	FALSE	FALSE	FALSE	FALSE
chr1	15467939	15469162	1224	*	mm10_rmsk	exon	31637		L1_Mus1	L1_Mus1_dup220	L1	LINE	-87087	RP24-66C10.4	ENSMUST00000194564.1	intronic	intronic	gene_body	1.10122	-1.30237	10.0195	0.00243606	0.028047	0.568501	13.4728	115.916	4.95501e-08	3.05101e-06	0	0	FALSE	FALSE	FALSE	FALSE	FALSE	FALSE
chr1	15517659	15520928	3270	*	mm10_rmsk	exon	14860		L1VL1	L1VL1_dup35	L1	LINE	-35321	RP24-66C10.4	ENSMUST00000194564.1	intronic	intronic	gene_body	1.30897	-1.13948	13.8534	0.000438766	0.00765413	0.408941	9.79875	95.693	1.58574e-07	3.87825e-06	0	0	FALSE	FALSE	FALSE	FALSE	TRUE	FALSE
chr1	15535681	15536025	345	*	mm10_rmsk	exon	646		MLT1C	MLT1C_dup21	ERVL-MaLR	LTR	-20224	RP24-66C10.4	ENSMUST00000194564.1	intronic	intronic	gene_body	-1.15905	-1.29403	11.7266	0.00111805	0.0157078	0.0427272	10.8064	1.49428	0.24233	0.294427	0	0	TRUE	TRUE	TRUE	FALSE	FALSE	FALSE
chr1	15553578	15553753	176	*	mm10_rmsk	exon	271		MER5A	MER5A_dup23	hAT-Charlie	DNA	-2496	RP24-66C10.4	ENSMUST00000194564.1	intronic	intronic	gene_body	-1.47244	-1.45652	13.7408	0.000460614	0.00795155	-0.185045	10.7515	46.2135	1.00605e-05	5.4385e-05	0	0	FALSE	FALSE	FALSE	FALSE	FALSE	FALSE
chr1	15553851	15554046	196	*	mm10_rmsk	exon	684		B3A	B3A_dup286	B2	SINE	-2203	RP24-66C10.4	ENSMUST00000194564.1	intronic	intronic	gene_body	-1.93616	-0.0702165	52.3382	1.00756e-09	7.26391e-07	-0.0693289	14.2699	6.57714	0.0228853	0.0371879	0	0	TRUE	FALSE	TRUE	FALSE	FALSE	FALSE
chr1	15554062	15554133	72	*	mm10_rmsk	exon	242		B1_Mur2	B1_Mur2_dup117	Alu	SINE	-2116	RP24-66C10.4	ENSMUST00000194564.1	intronic	intronic	gene_body	-1.43437	-0.919761	21.1589	2.24303e-05	0.000735972	-0.133884	12.7428	10.2743	0.00656262	0.0121381	0	0	FALSE	FALSE	FALSE	FALSE	FALSE	FALSE
chr1	15641078	15641506	429	*	mm10_rmsk	exon	1607		RMER17C	RMER17C_dup41	ERVK	LTR	-44540	Gm25227	ENSMUST00000158204.1	intronic	intronic	gene_body	1.96587	-2.55386	9.91608	0.00255596	0.0290355	-0.174785	11.5718	3.94549	0.0712389	0.1022	0	0	FALSE	FALSE	FALSE	FALSE	FALSE	FALSE
chr1	15643791	15644594	804	*	mm10_rmsk	exon	12015		RMER17C-int	RMER17C-int_dup17	ERVK	LTR	-41452	Gm25227	ENSMUST00000158204.1	intronic	intronic	gene_body	-1.52928	1.25499	37.5955	7.45931e-08	1.07409e-05	-0.218437	9.5556	17.8715	0.000898667	0.00205646	0	0	TRUE	TRUE	TRUE	FALSE	FALSE	TRUE
chr1	15644636	15645178	543	*	mm10_rmsk	exon	12015		RMER17C-int	RMER17C-int_dup18	ERVK	LTR	-40868	Gm25227	ENSMUST00000158204.1	intronic	intronic	gene_body	-1.33714	-0.128758	22.764	1.2173e-05	0.000456585	-0.218437	9.5556	17.8715	0.000898667	0.00205646	0	0	FALSE	FALSE	FALSE	FALSE	FALSE	FALSE
chr1	15651008	15651092	85	*	mm10_rmsk	exon	340		RLTR14	RLTR14_dup15	ERV1	LTR	-34954	Gm25227	ENSMUST00000158204.1	intronic	intronic	gene_body	-1.13303	-0.385441	17.2808	0.000104251	0.002475	0.0133794	9.19462	0.221146	0.645625	0.686092	7.29648e-300	3.32461e-299	TRUE	FALSE	TRUE	FALSE	FALSE	FALSE
chr1	15651095	15651247	153	*	mm10_rmsk	exon	654		ID_B1	ID_B1_dup332	B4	SINE	-34799	Gm25227	ENSMUST00000158204.1	intronic	intronic	gene_body	-1.63675	0.190989	42.3313	1.7442e-08	4.07824e-06	-0.175808	14.6041	23.3246	0.000290382	0.000788684	0	0	TRUE	TRUE	TRUE	FALSE	FALSE	FALSE
chr1	15659163	15659765	603	*	mm10_rmsk	exon	2480		RMER13A1	RMER13A1_dup8	ERVK	LTR	-26281	Gm25227	ENSMUST00000158204.1	intronic	intronic	gene_body	-1.49848	0.853893	38.7716	5.16399e-08	8.37968e-06	-0.315623	9.73001	57.1887	3.14149e-06	2.42596e-05	0	0	TRUE	TRUE	TRUE	FALSE	FALSE	FALSE
chr1	15659759	15659889	131	*	mm10_rmsk	exon	322		RMER13A	RMER13A_dup4	ERVK	LTR	-26157	Gm25227	ENSMUST00000158204.1	intronic	intronic	gene_body	-1.63069	0.320584	41.1103	2.51951e-08	5.19566e-06	-0.306704	9.72648	48.6579	7.62566e-06	4.53889e-05	0	0	TRUE	TRUE	TRUE	FALSE	FALSE	FALSE
chr1	15659920	15660084	165	*	mm10_rmsk	exon	758		RMER13A1	RMER13A1_dup9	ERVK	LTR	-25962	Gm25227	ENSMUST00000158204.1	intronic	intronic	gene_body	-1.62425	0.273365	38.6947	5.28903e-08	8.51536e-06	-0.315623	9.73001	57.1887	3.14149e-06	2.42596e-05	0	0	TRUE	TRUE	TRUE	FALSE	FALSE	FALSE
chr1	15805013	15805170	158	*	mm10_rmsk	exon	367		MER5A	MER5A_dup25	hAT-Charlie	DNA	-476	Terf1	ENSMUST00000188371.6	intergenic	proximal <=1000bp	Tss_prox_1kbp	-1.18274	0.471618	22.0855	1.57355e-05	0.000557128	-0.185045	10.7515	46.2135	1.00605e-05	5.4385e-05	0	0	FALSE	FALSE	FALSE	TRUE	FALSE	TRUE
chr1	15806228	15806500	273	*	mm10_rmsk	exon	484		B4	B4_dup197	B4	SINE	564	Terf1	ENSMUST00000027057.7	intronic	proximal <=1000bp	Tss_prox_1kbp	-1.0939	2.24952	19.8737	3.69612e-05	0.00108901	0.0559679	13.6316	3.88846	0.0693232	0.0998362	0	0	TRUE	TRUE	TRUE	TRUE	FALSE	TRUE
chr1	15848195	15848285	91	*	mm10_rmsk	exon	281		LTR41	LTR41	ERVL	LTR	-5046	RP23-325F17.4	ENSMUST00000194867.1	intergenic	intergenic	intergenic	-1.52108	-1.84902	10.6878	0.00179013	0.0223213	-0.606087	7.90175	100.504	1.18028e-07	3.47561e-06	2.288e-244	8.79402e-244	FALSE	FALSE	FALSE	FALSE	FALSE	FALSE
chr1	15851143	15851642	500	*	mm10_rmsk	exon	2554		RLTR20A1	RLTR20A1	ERVK	LTR	-1689	RP23-325F17.4	ENSMUST00000194867.1	intergenic	intergenic	intergenic	-1.12348	-0.943438	12.7123	0.000721489	0.0112483	-0.062353	4.47624	0.782432	0.391778	0.445982	7.81534e-17	1.01393e-16	FALSE	FALSE	FALSE	FALSE	FALSE	FALSE
chr1	15851966	15852104	139	*	mm10_rmsk	exon	533		ORR1F	ORR1F_dup149	ERVL-MaLR	LTR	-1227	RP23-325F17.4	ENSMUST00000194867.1	intergenic	intergenic	intergenic	-1.10403	-1.57985	8.54364	0.0048874	0.0461345	-0.0391757	12.46	2.04136	0.175651	0.223356	0	0	FALSE	FALSE	FALSE	FALSE	FALSE	FALSE
chr1	15883061	15883129	69	*	mm10_rmsk	exon	277		RLTR24B_MM	RLTR24B_MM_dup7	ERV1	LTR	3531	Gm23259	ENSMUST00000158318.1	intronic	intronic	gene_body	-1.94594	-1.67086	19.5742	4.15792e-05	0.0011949	0.170581	6.75901	17.8847	0.000896005	0.00205457	2.11874e-74	4.38495e-74	FALSE	FALSE	FALSE	FALSE	FALSE	FALSE
chr1	15902765	15903180	416	*	mm10_rmsk	exon	481		MLT1C	MLT1C_dup23	ERVL-MaLR	LTR	10043	Sbspon	ENSMUST00000040695.4	intergenic	intergenic	intergenic	-1.08294	-1.33012	8.87873	0.00416424	0.0412138	0.0427272	10.8064	1.49428	0.24233	0.294427	0	0	FALSE	FALSE	FALSE	FALSE	FALSE	FALSE
chr1	15909766	15910083	318	*	mm10_rmsk	exon	398		Charlie2b	Charlie2b_dup6	hAT-Charlie	DNA	17044	Sbspon	ENSMUST00000040695.4	intergenic	intergenic	intergenic	-1.61172	-1.86653	12.1134	0.00094056	0.0137718	0.033895	7.01303	0.407241	0.533979	0.584722	1.21118e-77	2.55342e-77	TRUE	FALSE	TRUE	FALSE	FALSE	FALSE
chr1	16014925	16015233	309	*	mm10_rmsk	exon	1974		MERVL_2A-int	MERVL_2A-int_dup44	ERVL	LTR	-38102	RP24-178O17.1	ENSMUST00000185778.1	intergenic	intergenic	intergenic	-1.13664	0.396326	17.9265	8.0218e-05	0.00201419	0.421914	10.1471	113.592	5.60901e-08	3.05101e-06	0	0	TRUE	TRUE	TRUE	FALSE	FALSE	FALSE
chr1	16026305	16027236	932	*	mm10_rmsk	exon	2360		Lx8	Lx8_dup255	L1	LINE	-26099	RP24-178O17.1	ENSMUST00000185778.1	intergenic	intergenic	intergenic	1.4548	-1.20988	12.4639	0.000841566	0.0126496	0.121817	13.7403	15.9377	0.00141182	0.00306763	0	0	TRUE	TRUE	FALSE	TRUE	FALSE	TRUE
chr1	16062036	16062196	161	*	mm10_rmsk	exon	631		B3	B3_dup485	B2	SINE	8701	RP24-178O17.1	ENSMUST00000185778.1	intergenic	intergenic	intergenic	-1.33114	-0.578867	21.2044	2.20408e-05	0.000725438	-0.0408682	15.0047	1.97967	0.18188	0.229711	0	0	TRUE	TRUE	TRUE	FALSE	FALSE	FALSE
chr1	16068652	16068755	104	*	mm10_rmsk	exon	270		B1F	B1F_dup177	Alu	SINE	-12457	AC162442.2	ENSMUST00000115367.7	intronic	intronic	gene_body	-1.44572	0.288201	30.8712	6.71565e-07	5.11902e-05	-0.210784	13.2074	26.2569	0.000169765	0.00050658	0	0	TRUE	TRUE	TRUE	FALSE	FALSE	FALSE
chr1	16099227	16099280	54	*	mm10_rmsk	exon	265		RSINE1	RSINE1_dup355	B4	SINE	-2802	Rpl7	ENSMUST00000140597.7	intergenic	intergenic	intergenic	-1.29187	-1.19923	14.0654	0.00040048	0.00713046	0.0578688	14.2698	3.88326	0.0694883	0.0999452	0	0	FALSE	FALSE	FALSE	FALSE	FALSE	FALSE
chr1	16125013	16125191	179	*	mm10_rmsk	exon	1271		B2_Mm1t	B2_Mm1t_dup119	B2	SINE	-5311	Rdh10	ENSMUST00000152626.1	intronic	intronic	gene_body	-1.04196	-1.01594	10.1083	0.00233771	0.0272147	0.162653	12.0786	9.5898	0.00812187	0.0146351	0	0	TRUE	FALSE	TRUE	FALSE	FALSE	FALSE
chr1	16157092	16157199	108	*	mm10_rmsk	exon	266		Lx8	Lx8_dup257	L1	LINE	26590	Rdh10	ENSMUST00000152626.1	intergenic	intergenic	intergenic	-1.23809	-0.151655	18.9202	5.38674e-05	0.00146803	0.121817	13.7403	15.9377	0.00141182	0.00306763	0	0	TRUE	TRUE	TRUE	FALSE	FALSE	FALSE
chr1	16157224	16157431	208	*	mm10_rmsk	exon	722		B3	B3_dup493	B2	SINE	26722	Rdh10	ENSMUST00000152626.1	intergenic	intergenic	intergenic	-1.01818	-0.517884	12.5073	0.000789757	0.0120526	-0.0408682	15.0047	1.97967	0.18188	0.229711	0	0	TRUE	TRUE	TRUE	FALSE	FALSE	FALSE
chr1	16158848	16158972	125	*	mm10_rmsk	exon	380		ID_B1	ID_B1_dup373	B4	SINE	28346	Rdh10	ENSMUST00000152626.1	intergenic	intergenic	intergenic	-1.43107	-0.263373	29.2685	1.16359e-06	7.65499e-05	-0.175808	14.6041	23.3246	0.000290382	0.000788684	0	0	TRUE	FALSE	TRUE	FALSE	FALSE	FALSE
chr1	16159710	16159775	66	*	mm10_rmsk	exon	237		L2c	L2c_dup43	L2	LINE	29208	Rdh10	ENSMUST00000152626.1	intergenic	intergenic	intergenic	-1.41617	0.16931	25.0909	5.13742e-06	0.000234366	-0.103946	11.2892	15.3661	0.00162344	0.00345367	0	0	TRUE	TRUE	TRUE	FALSE	FALSE	FALSE
chr1	16159867	16160002	136	*	mm10_rmsk	exon	651		B1_Mur1	B1_Mur1_dup127	Alu	SINE	29365	Rdh10	ENSMUST00000152626.1	intergenic	intergenic	intergenic	-1.14813	-0.0322693	18.59	6.14469e-05	0.00162881	-0.179663	13.0741	14.4372	0.00205038	0.00424761	0	0	FALSE	FALSE	FALSE	FALSE	FALSE	TRUE
chr1	16160153	16160334	182	*	mm10_rmsk	exon	689		B3A	B3A_dup313	B2	SINE	29651	Rdh10	ENSMUST00000152626.1	intergenic	intergenic	intergenic	-1.38635	0.908623	31.0983	6.21771e-07	4.83097e-05	-0.0693289	14.2699	6.57714	0.0228853	0.0371879	0	0	TRUE	TRUE	TRUE	FALSE	FALSE	FALSE
chr1	16171959	16172286	328	*	mm10_rmsk	exon	1237		MTD	MTD_dup242	ERVL-MaLR	LTR	-38231	RP24-178O17.2	ENSMUST00000192560.1	intergenic	intergenic	intergenic	-1.3511	-0.019531	26.9061	2.66887e-06	0.000142008	-0.128328	13.8494	24.9898	0.000212962	0.000611037	0	0	TRUE	TRUE	TRUE	FALSE	FALSE	FALSE
chr1	16177327	16177660	334	*	mm10_rmsk	exon	503		RCHARR1	RCHARR1_dup33	hAT-Charlie	DNA	-32857	RP24-178O17.2	ENSMUST00000192560.1	intergenic	intergenic	intergenic	-1.20607	-1.53104	10.3062	0.00213327	0.0254245	0.102415	10.2839	7.68306	0.0153275	0.0257177	0	0	TRUE	FALSE	TRUE	FALSE	FALSE	FALSE
chr1	16214722	16215068	347	*	mm10_rmsk	exon	557		L1ME2z	L1ME2z_dup3	L1	LINE	4205	RP24-178O17.2	ENSMUST00000192560.1	intergenic	intergenic	intergenic	-1.32408	1.06078	26.4525	3.13888e-06	0.000160689	0.275353	7.7491	51.784	5.43529e-06	3.5777e-05	1.25564e-67	2.50685e-67	TRUE	TRUE	TRUE	FALSE	FALSE	TRUE
chr1	16215069	16215376	308	*	mm10_rmsk	exon	2144		RLTR27	RLTR27_dup15	ERVK	LTR	4552	RP24-178O17.2	ENSMUST00000192560.1	intergenic	intergenic	intergenic	-1.40384	2.05381	31.1331	6.14485e-07	4.78869e-05	-0.799988	10.5008	19.9396	0.00118207	0.00261929	0	0	TRUE	TRUE	TRUE	FALSE	FALSE	TRUE
chr1	16215377	16215445	69	*	mm10_rmsk	exon	557		L1ME2z	L1ME2z_dup4	L1	LINE	4860	RP24-178O17.2	ENSMUST00000192560.1	intergenic	intergenic	intergenic	-1.29656	-0.754899	16.2843	0.000157023	0.00341595	0.275353	7.7491	51.784	5.43529e-06	3.5777e-05	1.25564e-67	2.50685e-67	FALSE	FALSE	FALSE	FALSE	FALSE	TRUE
chr1	16215488	16215583	96	*	mm10_rmsk	exon	557		L1ME2z	L1ME2z_dup5	L1	LINE	4971	RP24-178O17.2	ENSMUST00000192560.1	intergenic	intergenic	intergenic	-1.41332	-1.53352	12.5423	0.000777639	0.0119087	0.275353	7.7491	51.784	5.43529e-06	3.5777e-05	1.25564e-67	2.50685e-67	FALSE	FALSE	FALSE	FALSE	FALSE	TRUE
chr1	16283726	16287092	3367	*	mm10_rmsk	exon	27343		L1_Mus4	L1_Mus4_dup86	L1	LINE	30097	AC167117.2	ENSMUST00000159190.1	intronic	intronic	gene_body	1.35162	-0.531813	24.5147	6.34513e-06	0.000275687	0.534569	12.2714	89.1906	2.41524e-07	5.00491e-06	0	0	FALSE	FALSE	FALSE	FALSE	FALSE	FALSE
chr1	16295502	16295563	62	*	mm10_rmsk	exon	220		MIR	MIR_dup94	MIR	SINE	41873	AC167117.2	ENSMUST00000159190.1	intronic	intronic	gene_body	-1.22072	-0.787205	12.8558	0.000677354	0.0107206	-0.0763741	12.8857	8.72251	0.0107557	0.0189413	0	0	TRUE	TRUE	TRUE	FALSE	FALSE	FALSE
chr1	16349715	16349830	116	*	mm10_rmsk	exon	239		Tigger7	Tigger7_dup34	TcMar-Tigger	DNA	-25565	Stau2	ENSMUST00000115360.7	intronic	intronic	gene_body	1.86404	-2.38129	10.0582	0.00239268	0.0276783	0.0408745	10.0307	2.82424	0.115677	0.156757	0	0	FALSE	FALSE	FALSE	FALSE	FALSE	FALSE
chr1	16383038	16383895	858	*	mm10_rmsk	exon	6414		L1VL2	L1VL2_dup62	L1	LINE	7643	Stau2	ENSMUST00000115360.7	intronic	intronic	gene_body	1.28875	-1.61609	10.8896	0.0016325	0.0208366	0.412803	11.1411	86.8287	2.83295e-07	5.12027e-06	0	0	FALSE	FALSE	FALSE	FALSE	FALSE	FALSE
chr1	16468057	16469069	1013	*	mm10_rmsk	exon	4164		ORR1D1-int	ORR1D1-int_dup13	ERVL-MaLR	LTR	-50142	Stau2	ENSMUST00000159558.7	intronic	intronic	gene_body	-1.62214	-0.961376	25.0273	5.25818e-06	0.000238542	0.237814	8.83874	35.3196	4.05955e-05	0.000154736	6.20015e-181	1.95158e-180	TRUE	FALSE	TRUE	FALSE	FALSE	FALSE
chr1	16489012	16489155	144	*	mm10_rmsk	exon	460		B1F	B1F_dup188	Alu	SINE	-30056	Stau2	ENSMUST00000159558.7	intronic	intronic	gene_body	-1.48063	-0.849404	20.658	2.7221e-05	0.000857158	-0.210784	13.2074	26.2569	0.000169765	0.00050658	0	0	TRUE	FALSE	TRUE	FALSE	FALSE	FALSE
chr1	16491018	16491116	99	*	mm10_rmsk	exon	296		ID_B1	ID_B1_dup385	B4	SINE	-28095	Stau2	ENSMUST00000159558.7	intronic	intronic	gene_body	-1.58638	-1.40465	16.1141	0.000168509	0.00361304	-0.175808	14.6041	23.3246	0.000290382	0.000788684	0	0	FALSE	FALSE	FALSE	FALSE	FALSE	FALSE
chr1	16491038	16491138	101	*	mm10_rmsk	exon	361		PB1D10	PB1D10_dup258	Alu	SINE	-28073	Stau2	ENSMUST00000159558.7	intronic	intronic	gene_body	-1.55873	-1.42323	15.3828	0.000228747	0.00459518	-0.196601	13.5951	25.3633	0.00019904	0.000578507	0	0	FALSE	FALSE	FALSE	FALSE	FALSE	FALSE
chr1	16491241	16491438	198	*	mm10_rmsk	exon	1074		B3	B3_dup504	B2	SINE	-27773	Stau2	ENSMUST00000159558.7	intronic	intronic	gene_body	-1.23334	0.370003	27.2962	2.32305e-06	0.000127959	-0.0408682	15.0047	1.97967	0.18188	0.229711	0	0	TRUE	TRUE	TRUE	FALSE	FALSE	FALSE
chr1	16519373	16519543	171	*	mm10_rmsk	exon	284		IMPB_01	IMPB_01_dup75	Satellite	Satellite	66	Stau2	ENSMUST00000149320.8	intronic	proximal <=1000bp	Tss_prox_1kbp	-1.41738	-0.238518	24.3108	6.83998e-06	0.000292089	0.274633	11.8608	41.784	1.71433e-05	8.23859e-05	0	0	TRUE	TRUE	TRUE	FALSE	FALSE	TRUE
chr1	16519724	16519742	19	*	mm10_rmsk	exon	284		IMPB_01	IMPB_01_dup76	Satellite	Satellite	-278	Stau2	ENSMUST00000144138.3	intronic	proximal <=1000bp	Tss_prox_1kbp	-1.36964	-0.755705	17.3599	0.00010094	0.00241206	0.274633	11.8608	41.784	1.71433e-05	8.23859e-05	0	0	TRUE	FALSE	TRUE	FALSE	FALSE	FALSE
chr1	16532909	16533424	516	*	mm10_rmsk	exon	10132		L1_Mur2	L1_Mur2_dup108	L1	LINE	12797	Stau2	ENSMUST00000162435.7	intergenic	intergenic	intergenic	-1.89845	-1.01405	31.8085	4.89318e-07	4.05693e-05	0.419816	12.2317	109.992	6.82796e-08	3.05101e-06	0	0	TRUE	FALSE	TRUE	FALSE	FALSE	FALSE
chr1	16534232	16534351	120	*	mm10_rmsk	exon	292		RMER13A1	RMER13A1_dup11	ERVK	LTR	14120	Stau2	ENSMUST00000162435.7	intergenic	intergenic	intergenic	-1.64141	-1.31887	19.4055	4.44407e-05	0.00125988	-0.315623	9.73001	57.1887	3.14149e-06	2.42596e-05	0	0	TRUE	FALSE	TRUE	FALSE	FALSE	FALSE
chr1	16554052	16554254	203	*	mm10_rmsk	exon	922		B3	B3_dup509	B2	SINE	-31144	Ube2w	ENSMUST00000182080.1	intronic	intronic	gene_body	-1.11167	-0.874597	13.8694	0.000435738	0.00761442	-0.0408682	15.0047	1.97967	0.18188	0.229711	0	0	TRUE	TRUE	TRUE	FALSE	FALSE	FALSE
chr1	16554292	16554433	142	*	mm10_rmsk	exon	988		B1_Mur4	B1_Mur4_dup139	Alu	SINE	-30965	Ube2w	ENSMUST00000182080.1	intronic	intronic	gene_body	-1.96188	-2.23803	13.6282	0.000483631	0.00825765	-0.197949	13.0761	16.1554	0.00133973	0.00293351	0	0	FALSE	FALSE	FALSE	FALSE	FALSE	FALSE
chr1	16555749	16556086	338	*	mm10_rmsk	exon	1322		ORR1D1	ORR1D1_dup118	ERVL-MaLR	LTR	-29312	Ube2w	ENSMUST00000182080.1	intronic	intronic	gene_body	-1.26423	-0.518691	19.7264	3.91627e-05	0.00113967	0.0522614	12.1868	4.48196	0.0532154	0.0784558	0	0	TRUE	FALSE	TRUE	FALSE	FALSE	FALSE
chr1	16556087	16556141	55	*	mm10_rmsk	exon	417		L1M3	L1M3_dup55	L1	LINE	-29257	Ube2w	ENSMUST00000182080.1	intronic	intronic	gene_body	-1.48803	-1.85504	9.27969	0.00344366	0.0360117	0.0766409	9.98614	5.404	0.0361441	0.0561739	0	0	TRUE	FALSE	TRUE	FALSE	FALSE	FALSE
chr1	16556142	16556461	320	*	mm10_rmsk	exon	2372		L1_Mus2	L1_Mus2_dup173	L1	LINE	-28937	Ube2w	ENSMUST00000182080.1	intronic	intronic	gene_body	-1.31706	-1.63634	9.60143	0.00296034	0.0323214	0.484439	13.0175	105.113	8.99763e-08	3.05101e-06	0	0	FALSE	FALSE	FALSE	FALSE	FALSE	FALSE
chr1	16587912	16588003	92	*	mm10_rmsk	exon	232		PB1D10	PB1D10_dup261	Alu	SINE	2514	Ube2w	ENSMUST00000182080.1	intronic	intronic	gene_body	-2.60619	-1.31809	40.2433	3.28068e-08	6.17735e-06	-0.196601	13.5951	25.3633	0.00019904	0.000578507	0	0	FALSE	FALSE	FALSE	FALSE	FALSE	FALSE
chr1	16608285	16608375	91	*	mm10_rmsk	exon	343		B1_Mur2	B1_Mur2_dup128	Alu	SINE	-10185	RP23-382H8.2	ENSMUST00000195710.1	intronic	intronic	gene_body	-1.16856	-0.766486	15.0228	0.000266243	0.00517828	-0.133884	12.7428	10.2743	0.00656262	0.0121381	0	0	TRUE	FALSE	TRUE	FALSE	FALSE	FALSE
chr1	16608299	16608465	167	*	mm10_rmsk	exon	235		MT2B	MT2B_dup55	ERVL	LTR	-10095	RP23-382H8.2	ENSMUST00000195710.1	intronic	intronic	gene_body	-1.13914	-0.575788	15.5742	0.000211093	0.00431212	-0.0168277	10.8487	0.294364	0.596222	0.64213	0	0	TRUE	FALSE	TRUE	FALSE	FALSE	FALSE
chr1	16609545	16609649	105	*	mm10_rmsk	exon	226		MER2	MER2_dup70	TcMar-Tigger	DNA	-8911	RP23-382H8.2	ENSMUST00000195710.1	intronic	intronic	gene_body	1.44252	-2.16286	9.16063	0.00364288	0.0374895	0.197037	10.6909	40.96	1.90215e-05	8.98103e-05	0	0	FALSE	FALSE	FALSE	FALSE	FALSE	FALSE
chr1	16632318	16632399	82	*	mm10_rmsk	exon	233		PB1D10	PB1D10_dup264	Alu	SINE	12829	Ube2w	ENSMUST00000117146.7	intergenic	intergenic	intergenic	-1.3861	-0.363999	24.4468	6.5056e-06	0.000280932	-0.196601	13.5951	25.3633	0.00019904	0.000578507	0	0	TRUE	FALSE	TRUE	FALSE	FALSE	FALSE
chr1	16651357	16651503	147	*	mm10_rmsk	exon	1115		B1_Mus1	B1_Mus1_dup423	Alu	SINE	3318	Eloc	ENSMUST00000185393.6	intronic	intronic	gene_body	1.46566	-2.06312	8.76662	0.00439282	0.0428102	-0.146129	14.2108	8.59991	0.011203	0.0196492	0	0	FALSE	FALSE	FALSE	FALSE	FALSE	FALSE
chr1	16651533	16651611	79	*	mm10_rmsk	exon	291		B1F1	B1F1_dup79	Alu	SINE	3494	Eloc	ENSMUST00000185393.6	intronic	intronic	gene_body	1.63184	-2.33328	8.43134	0.00515832	0.0479036	-0.20613	12.0803	22.9816	0.000310097	0.000836142	0	0	FALSE	FALSE	FALSE	FALSE	FALSE	FALSE
chr1	16664665	16664792	128	*	mm10_rmsk	exon	895		B1_Mus1	B1_Mus1_dup425	Alu	SINE	-415	Tmem70	ENSMUST00000177501.1	intergenic	proximal <=1000bp	Tss_prox_1kbp	-1.00599	-0.0558658	12.1247	0.000935852	0.0137185	-0.146129	14.2108	8.59991	0.011203	0.0196492	0	0	FALSE	FALSE	FALSE	TRUE	FALSE	TRUE
chr1	16665697	16665837	141	*	mm10_rmsk	exon	468		B1_Mur2	B1_Mur2_dup133	Alu	SINE	461	Tmem70	ENSMUST00000176451.1	exonic	proximal <=1000bp	Tss_prox_1kbp	-1.0158	0.878826	16.7061	0.000131921	0.00297951	-0.133884	12.7428	10.2743	0.00656262	0.0121381	0	0	TRUE	FALSE	FALSE	TRUE	FALSE	TRUE
chr1	16683273	16683407	135	*	mm10_rmsk	exon	714		B1_Mur1	B1_Mur1_dup134	Alu	SINE	-4644	Ly96	ENSMUST00000191260.1	intergenic	intergenic	intergenic	-1.82004	-2.32077	9.46079	0.00316224	0.0338998	-0.179663	13.0741	14.4372	0.00205038	0.00424761	0	0	FALSE	FALSE	FALSE	FALSE	FALSE	FALSE
chr1	16727517	16727831	315	*	mm10_rmsk	exon	1865		MTC	MTC_dup160	ERVL-MaLR	LTR	-30792	RP23-470P10.1	ENSMUST00000185649.1	intergenic	intergenic	intergenic	2.92838	-2.45179	22.2782	1.46256e-05	0.000526216	-0.0712501	12.9646	7.63021	0.0156148	0.0261341	0	0	FALSE	FALSE	FALSE	FALSE	FALSE	FALSE
chr1	16736932	16737376	445	*	mm10_rmsk	exon	3040		MTB	MTB_dup26	ERVL-MaLR	LTR	-21247	RP23-470P10.1	ENSMUST00000185649.1	intergenic	intergenic	intergenic	1.63046	-2.3374	8.68402	0.00456961	0.0439972	0.185179	10.8559	26.8594	0.000152819	0.000465954	0	0	FALSE	FALSE	FALSE	FALSE	FALSE	FALSE
chr1	16780027	16780373	347	*	mm10_rmsk	exon	1916		L1_Mur3	L1_Mur3_dup234	L1	LINE	9889	RP23-470P10.2	ENSMUST00000071842.9	intergenic	intergenic	intergenic	1.51893	-2.30346	8.35851	0.0053424	0.0491003	0.334543	12.3059	85.3852	3.12894e-07	5.33454e-06	0	0	FALSE	FALSE	FALSE	FALSE	FALSE	FALSE
chr1	16786145	16787264	1120	*	mm10_rmsk	exon	10434		L1_Mus4	L1_Mus4_dup90	L1	LINE	16007	RP23-470P10.2	ENSMUST00000071842.9	intergenic	intergenic	intergenic	1.31165	-1.17528	15.7547	0.000195729	0.00406388	0.534569	12.2714	89.1906	2.41524e-07	5.00491e-06	0	0	FALSE	FALSE	FALSE	FALSE	FALSE	FALSE
chr1	16798039	16798163	125	*	mm10_rmsk	exon	557		B1F	B1F_dup192	Alu	SINE	27901	RP23-470P10.2	ENSMUST00000071842.9	intergenic	intergenic	intergenic	-1.80157	-0.387659	40.9551	2.64092e-08	5.36686e-06	-0.210784	13.2074	26.2569	0.000169765	0.00050658	0	0	FALSE	FALSE	FALSE	FALSE	FALSE	FALSE
chr1	16800630	16800983	354	*	mm10_rmsk	exon	3100		L1_Mus1	L1_Mus1_dup243	L1	LINE	30492	RP23-470P10.2	ENSMUST00000071842.9	intergenic	intergenic	intergenic	1.54624	-2.30476	8.35011	0.00536407	0.0492303	0.568501	13.4728	115.916	4.95501e-08	3.05101e-06	0	0	FALSE	FALSE	FALSE	FALSE	FALSE	FALSE
chr1	16808805	16809152	348	*	mm10_rmsk	exon	2390		L1Md_F2	L1Md_F2_dup464	L1	LINE	38667	RP23-470P10.2	ENSMUST00000071842.9	intergenic	intergenic	intergenic	2.02188	-2.36295	12.8483	0.000679579	0.0107454	0.519061	15.1429	139.838	1.55383e-08	1.93193e-06	0	0	FALSE	FALSE	FALSE	FALSE	FALSE	FALSE
chr1	16842955	16844327	1373	*	mm10_rmsk	exon	7779		L1_Mus1	L1_Mus1_dup248	L1	LINE	-53858	RP24-254D14.3	ENSMUST00000186604.1	intergenic	intergenic	intergenic	1.34839	-1.49178	13.2162	0.000578496	0.00949595	0.568501	13.4728	115.916	4.95501e-08	3.05101e-06	0	0	FALSE	FALSE	FALSE	FALSE	FALSE	FALSE
chr1	16907119	16907609	491	*	mm10_rmsk	exon	3181		MusHAL1	MusHAL1_dup36	L1	LINE	8934	RP24-254D14.3	ENSMUST00000186604.1	intronic	intronic	gene_body	-2.51288	-2.49336	14.5696	0.000322736	0.00602391	0.264879	9.88329	46.9413	9.25267e-06	5.17687e-05	0	0	FALSE	FALSE	FALSE	FALSE	FALSE	FALSE
chr1	17013539	17013671	133	*	mm10_rmsk	exon	810		B1_Mus1	B1_Mus1_dup437	Alu	SINE	9320	Jph1	ENSMUST00000186024.1	intronic	intronic	gene_body	-1.95271	-2.5349	8.36664	0.00532151	0.0489642	-0.146129	14.2108	8.59991	0.011203	0.0196492	0	0	FALSE	FALSE	FALSE	FALSE	FALSE	FALSE
chr1	17045852	17047565	1714	*	mm10_rmsk	exon	5871		L1VL4	L1VL4_dup73	L1	LINE	41633	Jph1	ENSMUST00000186024.1	intronic	intronic	gene_body	1.06524	-0.834388	13.1569	0.000593672	0.00968493	0.46762	11.3684	120.293	3.9467e-08	2.94424e-06	0	0	FALSE	FALSE	FALSE	FALSE	FALSE	FALSE
chr1	17136375	17136705	331	*	mm10_rmsk	exon	2109		ORR1A4	ORR1A4_dup43	ERVL-MaLR	LTR	-8657	Gdap1	ENSMUST00000026879.7	intergenic	intergenic	intergenic	1.81001	-1.6526	19.1053	5.00474e-05	0.00138512	0.0380346	11.167	1.67359	0.217332	0.267835	0	0	FALSE	TRUE	FALSE	FALSE	FALSE	FALSE
chr1	17144003	17144420	418	*	mm10_rmsk	exon	2025		L1_Mus2	L1_Mus2_dup181	L1	LINE	-942	Gdap1	ENSMUST00000026879.7	intergenic	proximal <=1000bp	Tss_prox_1kbp	1.54537	-1.90886	11.8785	0.00104453	0.0149196	0.484439	13.0175	105.113	8.99763e-08	3.05101e-06	0	0	FALSE	FALSE	FALSE	FALSE	FALSE	FALSE
chr1	17145920	17146056	137	*	mm10_rmsk	exon	362		B1F2	B1F2_dup68	Alu	SINE	452	Gdap1	ENSMUST00000189736.1	intronic	proximal <=1000bp	Tss_prox_1kbp	-1.09147	-0.94744	12.6488	0.000741954	0.0114944	-0.209237	11.7791	21.8106	0.000389999	0.00100381	0	0	FALSE	FALSE	FALSE	FALSE	FALSE	FALSE
chr1	17166971	17167378	408	*	mm10_rmsk	exon	2363		MTC	MTC_dup161	ERVL-MaLR	LTR	-1025	RP24-317E22.1	ENSMUST00000187817.1	intergenic	intergenic	intergenic	-1.3407	-1.54757	12.4949	0.00079411	0.0121017	-0.0712501	12.9646	7.63021	0.0156148	0.0261341	0	0	FALSE	FALSE	TRUE	FALSE	TRUE	FALSE
chr1	17199505	17201236	1732	*	mm10_rmsk	exon	27255		L1_Mus4	L1_Mus4_dup97	L1	LINE	31102	RP24-317E22.1	ENSMUST00000187817.1	intergenic	intergenic	intergenic	1.19111	-1.31239	11.1663	0.00143948	0.0189801	0.534569	12.2714	89.1906	2.41524e-07	5.00491e-06	0	0	FALSE	FALSE	FALSE	FALSE	FALSE	FALSE
chr1	17210003	17211824	1822	*	mm10_rmsk	exon	9706		L1_Mur2	L1_Mur2_dup110	L1	LINE	-38668	RP24-317E22.2	ENSMUST00000187478.1	intergenic	intergenic	intergenic	1.27766	-1.59301	10.1311	0.00231316	0.0270021	0.419816	12.2317	109.992	6.82796e-08	3.05101e-06	0	0	FALSE	FALSE	FALSE	FALSE	FALSE	FALSE
chr1	17227941	17230467	2527	*	mm10_rmsk	exon	11608		L1VL1	L1VL1_dup38	L1	LINE	-20025	RP24-317E22.2	ENSMUST00000187478.1	intergenic	intergenic	intergenic	1.10173	-1.03777	11.1474	0.00145189	0.0190988	0.408941	9.79875	95.693	1.58574e-07	3.87825e-06	0	0	FALSE	FALSE	FALSE	FALSE	FALSE	FALSE
chr1	17267039	17270840	3802	*	mm10_rmsk	exon	20814		L1Md_F2	L1Md_F2_dup482	L1	LINE	16547	RP24-317E22.2	ENSMUST00000187478.1	intergenic	intergenic	intergenic	1.10946	-0.70289	15.0694	0.000261055	0.00509874	0.519061	15.1429	139.838	1.55383e-08	1.93193e-06	0	0	FALSE	FALSE	FALSE	FALSE	FALSE	FALSE
chr1	17323991	17325130	1140	*	mm10_rmsk	exon	6736		L1_Mus2	L1_Mus2_dup183	L1	LINE	-69828	RP23-215C21.1	ENSMUST00000188959.1	intergenic	intergenic	intergenic	1.63853	-1.64177	15.5684	0.000211602	0.00432037	0.484439	13.0175	105.113	8.99763e-08	3.05101e-06	0	0	FALSE	FALSE	FALSE	FALSE	FALSE	FALSE
chr1	17346378	17346585	208	*	mm10_rmsk	exon	1613		L1_Mus3	L1_Mus3_dup446	L1	LINE	-48373	RP23-215C21.1	ENSMUST00000188959.1	intergenic	intergenic	intergenic	2.24687	-2.82275	8.47763	0.0050448	0.0471569	0.491166	14.0232	104.073	9.55672e-08	3.14529e-06	0	0	FALSE	FALSE	FALSE	FALSE	FALSE	FALSE
chr1	17347064	17349402	2339	*	mm10_rmsk	exon	8035		Lx3_Mus	Lx3_Mus_dup62	L1	LINE	-45556	RP23-215C21.1	ENSMUST00000188959.1	intergenic	intergenic	intergenic	1.35906	-1.00252	18.2816	6.95295e-05	0.00179829	0.490828	12.3525	77.1477	5.68276e-07	7.57815e-06	0	0	FALSE	FALSE	FALSE	FALSE	FALSE	FALSE
chr1	17373964	17374255	292	*	mm10_rmsk	exon	2418		IAPEY5_LTR	IAPEY5_LTR_dup2	ERVK	LTR	-20703	RP23-215C21.1	ENSMUST00000188959.1	intergenic	intergenic	intergenic	-1.09449	-0.189858	14.6507	0.000311783	0.00586168	-0.313504	6.37934	19.341	0.000650109	0.00156783	5.39958e-71	1.09543e-70	TRUE	TRUE	TRUE	FALSE	FALSE	FALSE
chr1	17401462	17402873	1412	*	mm10_rmsk	exon	3958		L1_Mus1	L1_Mus1_dup261	L1	LINE	1181	Rbm6-ps1	ENSMUST00000186192.1	intergenic	intergenic	intergenic	1.32781	-1.48714	11.9239	0.00102354	0.0146945	0.568501	13.4728	115.916	4.95501e-08	3.05101e-06	0	0	FALSE	FALSE	FALSE	FALSE	FALSE	FALSE
chr1	17458037	17459150	1114	*	mm10_rmsk	exon	7835		Lx3_Mus	Lx3_Mus_dup64	L1	LINE	28509	RP23-215C21.3	ENSMUST00000186816.1	intergenic	intergenic	intergenic	1.29121	-1.64943	11.354	0.00132223	0.0178048	0.490828	12.3525	77.1477	5.68276e-07	7.57815e-06	0	0	FALSE	FALSE	FALSE	FALSE	FALSE	FALSE
chr1	17489446	17489699	254	*	mm10_rmsk	exon	3821		LTRIS2	LTRIS2_dup20	ERV1	LTR	-30302	Gm25166	ENSMUST00000158909.1	intergenic	intergenic	intergenic	-1.60235	-0.146325	38.4295	5.74429e-08	9.00883e-06	0.0611396	9.12038	2.90325	0.111145	0.151119	1.88605e-297	8.52493e-297	TRUE	FALSE	TRUE	FALSE	FALSE	FALSE
chr1	17489700	17490559	860	*	mm10_rmsk	exon	5155		RLTR13G	RLTR13G_dup17	ERVK	LTR	-29442	Gm25166	ENSMUST00000158909.1	intergenic	intergenic	intergenic	-1.30217	0.954908	27.4201	2.22321e-06	0.000123822	0.138842	7.57714	15.4805	0.00157832	0.00339643	1.3853e-88	3.07542e-88	TRUE	TRUE	TRUE	FALSE	FALSE	FALSE
chr1	17520465	17520783	319	*	mm10_rmsk	exon	1120		RMER1B	RMER1B_dup44	RMER1B	Other	464	Gm25166	ENSMUST00000158909.1	intergenic	proximal <=1000bp	Tss_prox_1kbp	1.2367	-1.84124	8.45623	0.00509695	0.0475017	0.0433976	12.0162	1.19464	0.29339	0.345947	0	0	FALSE	FALSE	FALSE	FALSE	FALSE	FALSE
chr1	17647030	17647597	568	*	mm10_rmsk	exon	3813		Lx3_Mus	Lx3_Mus_dup69	L1	LINE	5949	RP23-329F7.2	ENSMUST00000186267.1	intergenic	intergenic	intergenic	-1.10285	0.595298	19.0659	5.08366e-05	0.00140268	0.490828	12.3525	77.1477	5.68276e-07	7.57815e-06	0	0	TRUE	TRUE	TRUE	FALSE	FALSE	FALSE
chr1	17686206	17687565	1360	*	mm10_rmsk	exon	6432		ETnERV2-int	ETnERV2-int_dup24	ERVK	LTR	-39480	Crispld1	ENSMUST00000159958.7	intronic	intronic	gene_body	1.25649	-1.68263	8.58149	0.0047995	0.0455458	0.131158	9.20419	7.86341	0.0143927	0.024521	1.00403e-303	4.61202e-303	FALSE	FALSE	FALSE	FALSE	FALSE	FALSE
chr1	17690413	17693636	3224	*	mm10_rmsk	exon	23773		L1_Mus3	L1_Mus3_dup460	L1	LINE	-33409	Crispld1	ENSMUST00000159958.7	exonic	exonic	gene_body	1.14833	-1.05148	10.4807	0.00196856	0.0239602	0.491166	14.0232	104.073	9.55672e-08	3.14529e-06	0	0	FALSE	FALSE	FALSE	FALSE	FALSE	FALSE
chr1	17724703	17724881	179	*	mm10_rmsk	exon	518		B3A	B3A_dup362	B2	SINE	-2164	Crispld1	ENSMUST00000159958.7	intronic	intronic	gene_body	2.12717	-2.55696	11.2837	0.00136491	0.0182429	-0.0693289	14.2699	6.57714	0.0228853	0.0371879	0	0	FALSE	FALSE	FALSE	FALSE	FALSE	FALSE
chr1	17852294	17853548	1255	*	mm10_rmsk	exon	8247		Lx3A	Lx3A_dup38	L1	LINE	46877	RP23-329F7.3	ENSMUST00000189853.1	intergenic	intergenic	intergenic	1.21703	-1.26135	12.4433	0.00081244	0.0123109	0.471895	11.8934	70.5091	9.58045e-07	1.0572e-05	0	0	FALSE	FALSE	FALSE	FALSE	FALSE	FALSE
chr1	17944550	17944977	428	*	mm10_rmsk	exon	2431		RLTR45	RLTR45_dup17	ERVK	LTR	-2064	RP24-571A14.1	ENSMUST00000190885.1	intergenic	intergenic	intergenic	1.61562	-2.26747	8.46491	0.00507572	0.047362	0.414845	8.60792	50.8163	6.0251e-06	3.84355e-05	2.69704e-156	7.83458e-156	FALSE	FALSE	FALSE	FALSE	FALSE	FALSE
chr1	17945361	17946343	983	*	mm10_rmsk	exon	7745		L1_Mus1	L1_Mus1_dup270	L1	LINE	-698	RP24-571A14.1	ENSMUST00000190885.1	intergenic	proximal <=1000bp	Tss_prox_1kbp	1.35443	-1.48684	14.6549	0.000311226	0.00585328	0.568501	13.4728	115.916	4.95501e-08	3.05101e-06	0	0	FALSE	FALSE	FALSE	FALSE	FALSE	FALSE
chr1	17963932	17965561	1630	*	mm10_rmsk	exon	13969		L1Md_T	L1Md_T_dup158	L1	LINE	16891	RP24-571A14.1	ENSMUST00000190885.1	intergenic	intergenic	intergenic	1.26882	-1.4798	12.1675	0.0009182	0.0135208	0.582381	14.4509	129.235	2.53579e-08	2.36462e-06	0	0	FALSE	FALSE	FALSE	FALSE	FALSE	FALSE
chr1	17968741	17970069	1329	*	mm10_rmsk	exon	2183		Lx6	Lx6_dup160	L1	LINE	21700	RP24-571A14.1	ENSMUST00000190885.1	intergenic	intergenic	intergenic	1.2693	-1.79081	9.08771	0.00377082	0.0384216	0.298114	12.3587	77.597	5.49313e-07	7.53997e-06	0	0	FALSE	FALSE	FALSE	FALSE	FALSE	FALSE
chr1	18020723	18024146	3424	*	mm10_rmsk	exon	24542		L1_Mus1	L1_Mus1_dup271	L1	LINE	4537	RP24-571A14.2	ENSMUST00000185773.1	intronic	intronic	gene_body	1.15245	-0.758513	16.8245	0.000125653	0.00286686	0.568501	13.4728	115.916	4.95501e-08	3.05101e-06	0	0	FALSE	FALSE	FALSE	FALSE	FALSE	FALSE
chr1	18040794	18040940	147	*	mm10_rmsk	exon	294		MIRb	MIRb_dup109	MIR	SINE	5792	RP24-571A14.6	ENSMUST00000209898.1	intronic	intronic	gene_body	1.84673	-2.56577	8.79711	0.00432937	0.042366	-0.165951	13.1579	40.2205	2.09103e-05	9.5896e-05	0	0	FALSE	FALSE	FALSE	FALSE	FALSE	FALSE
chr1	18056968	18057291	324	*	mm10_rmsk	exon	1816		ERVB7_2B-LTR_MM	ERVB7_2B-LTR_MM_dup6	ERVK	LTR	-978	RP24-571A14.5	ENSMUST00000188360.1	intronic	proximal <=1000bp	Tss_prox_1kbp	-1.21799	0.243305	23.6119	8.86185e-06	0.000357177	-0.835739	8.79374	51.3472	2.05966e-05	9.52381e-05	0	0	TRUE	FALSE	TRUE	FALSE	TRUE	TRUE
chr1	18088895	18089012	118	*	mm10_rmsk	exon	313		B1F	B1F_dup203	Alu	SINE	29839	RP24-571A14.6	ENSMUST00000209405.1	intergenic	intergenic	intergenic	2.02989	-2.57297	9.4032	0.00324903	0.0345613	-0.210784	13.2074	26.2569	0.000169765	0.00050658	0	0	FALSE	FALSE	FALSE	FALSE	FALSE	FALSE
chr1	18171451	18172319	869	*	mm10_rmsk	exon	6478		RLTR13D5	RLTR13D5_dup15	ERVK	LTR	25549	Crisp4	ENSMUST00000026876.12	intergenic	intergenic	intergenic	1.42307	-1.32288	14.4921	0.000333589	0.00617859	0.341209	8.24726	45.9614	1.03589e-05	5.5729e-05	5.07952e-103	1.20585e-102	FALSE	FALSE	FALSE	FALSE	FALSE	FALSE
chr1	18179135	18180022	888	*	mm10_rmsk	exon	2081		Lx7	Lx7_dup296	L1	LINE	33233	Crisp4	ENSMUST00000026876.12	intergenic	intergenic	intergenic	2.57118	-2.65999	12.8884	0.000667722	0.0106036	0.295529	13.1367	105.492	8.80305e-08	3.05101e-06	0	0	FALSE	FALSE	FALSE	FALSE	FALSE	FALSE
chr1	18274833	18275917	1085	*	mm10_rmsk	exon	7240		L1_Mus4	L1_Mus4_dup111	L1	LINE	9695	Defb41	ENSMUST00000088463.1	intergenic	intergenic	intergenic	1.66825	-1.40017	17.2765	0.000104433	0.00247853	0.534569	12.2714	89.1906	2.41524e-07	5.00491e-06	0	0	FALSE	FALSE	FALSE	FALSE	FALSE	FALSE
chr1	18278028	18278365	338	*	mm10_rmsk	exon	2229		L1_Mus3	L1_Mus3_dup484	L1	LINE	12890	Defb41	ENSMUST00000088463.1	intergenic	intergenic	intergenic	1.93451	-2.27649	11.7567	0.00110305	0.0155487	0.491166	14.0232	104.073	9.55672e-08	3.14529e-06	0	0	FALSE	FALSE	FALSE	FALSE	FALSE	FALSE
chr1	18278452	18278739	288	*	mm10_rmsk	exon	1791		Lx3A	Lx3A_dup44	L1	LINE	13314	Defb41	ENSMUST00000088463.1	intergenic	intergenic	intergenic	2.12787	-1.92239	16.9347	0.000120098	0.00276612	0.471895	11.8934	70.5091	9.58045e-07	1.0572e-05	0	0	FALSE	FALSE	FALSE	FALSE	FALSE	FALSE
chr1	18283243	18284045	803	*	mm10_rmsk	exon	4839		Lx7	Lx7_dup304	L1	LINE	18105	Defb41	ENSMUST00000088463.1	intergenic	intergenic	intergenic	1.20419	-1.81577	8.42396	0.00517666	0.048024	0.295529	13.1367	105.492	8.80305e-08	3.05101e-06	0	0	FALSE	FALSE	FALSE	FALSE	FALSE	FALSE
chr1	18315546	18316028	483	*	mm10_rmsk	exon	3153		RMER6A	RMER6A_dup20	ERVK	LTR	50408	Defb41	ENSMUST00000088463.1	intergenic	intergenic	intergenic	-1.31576	-0.683717	21.0541	2.33546e-05	0.000759228	0.02397	10.6543	0.948996	0.346995	0.399885	0	0	TRUE	FALSE	TRUE	FALSE	FALSE	FALSE
chr1	18322675	18322906	232	*	mm10_rmsk	exon	576		B4A	B4A_dup384	B4	SINE	57537	Defb41	ENSMUST00000088463.1	intergenic	intergenic	intergenic	-1.02126	-1.23982	8.77566	0.00437389	0.0426771	0.0753296	14.4644	7.74941	0.0149756	0.0252756	0	0	FALSE	FALSE	FALSE	FALSE	FALSE	FALSE
chr1	18324100	18324220	121	*	mm10_rmsk	exon	485		ORR1D2	ORR1D2_dup78	ERVL-MaLR	LTR	58962	Defb41	ENSMUST00000088463.1	intergenic	intergenic	intergenic	-1.21331	-1.03129	14.2583	0.000368651	0.00668476	-0.192417	11.9933	47.1146	9.07148e-06	5.15279e-05	0	0	FALSE	FALSE	FALSE	FALSE	FALSE	TRUE
chr1	18324701	18325064	364	*	mm10_rmsk	exon	1697		ERVB7_2B-LTR_MM	ERVB7_2B-LTR_MM_dup7	ERVK	LTR	59563	Defb41	ENSMUST00000088463.1	intergenic	intergenic	intergenic	-1.16035	0.850542	19.7438	3.88954e-05	0.00113371	-0.835739	8.79374	51.3472	2.05966e-05	9.52381e-05	0	0	TRUE	TRUE	TRUE	FALSE	FALSE	FALSE
chr1	18392170	18392252	83	*	mm10_rmsk	exon	864		Lx8b	Lx8b_dup138	L1	LINE	127032	Defb41	ENSMUST00000088463.1	intergenic	intergenic	intergenic	-1.56597	-1.30228	16.6272	0.000136281	0.00305621	0.344871	12.3091	95.7401	1.58107e-07	3.87825e-06	0	0	FALSE	FALSE	FALSE	FALSE	FALSE	FALSE
chr1	18408664	18408969	306	*	mm10_rmsk	exon	1962		RLTR27	RLTR27_dup19	ERVK	LTR	143526	Defb41	ENSMUST00000088463.1	intergenic	intergenic	intergenic	-1.0569	1.05024	19.7496	3.8807e-05	0.0011317	-0.799988	10.5008	19.9396	0.00118207	0.00261929	0	0	TRUE	TRUE	TRUE	TRUE	FALSE	TRUE
chr1	18425030	18425318	289	*	mm10_rmsk	exon	19783		Lx5	Lx5_dup106	L1	LINE	159892	Defb41	ENSMUST00000088463.1	intergenic	intergenic	intergenic	-1.42231	-1.18369	16.4631	0.000145824	0.00322461	0.344861	12.7349	51.5136	5.59317e-06	3.66009e-05	0	0	FALSE	FALSE	FALSE	FALSE	FALSE	FALSE
chr1	18425555	18427155	1601	*	mm10_rmsk	exon	19783		Lx5	Lx5_dup107	L1	LINE	160417	Defb41	ENSMUST00000088463.1	intergenic	intergenic	intergenic	1.71482	-2.2246	10.2089	0.00223138	0.0262898	0.344861	12.7349	51.5136	5.59317e-06	3.66009e-05	0	0	FALSE	FALSE	FALSE	FALSE	FALSE	FALSE
chr1	18437129	18437426	298	*	mm10_rmsk	exon	925		Lx8	Lx8_dup297	L1	LINE	171991	Defb41	ENSMUST00000088463.1	intergenic	intergenic	intergenic	-1.01946	-0.942506	9.85361	0.00263138	0.0296584	0.121817	13.7403	15.9377	0.00141182	0.00306763	0	0	TRUE	FALSE	TRUE	FALSE	FALSE	FALSE
chr1	18552400	18552534	135	*	mm10_rmsk	exon	237		LTR33C	LTR33C	ERVL	LTR	-155894	RP24-284D7.1	ENSMUST00000189030.1	intergenic	intergenic	intergenic	-1.97689	-2.34625	11.445	0.001269	0.0172679	-0.560066	6.72268	34.1241	8.69156e-05	0.000294514	2.62687e-60	5.01412e-60	TRUE	FALSE	TRUE	FALSE	FALSE	FALSE
chr1	18570078	18570215	138	*	mm10_rmsk	exon	268		PB1D10	PB1D10_dup288	Alu	SINE	-138213	RP24-284D7.1	ENSMUST00000189030.1	intergenic	intergenic	intergenic	1.91888	-2.51155	8.4419	0.00513218	0.0477262	-0.196601	13.5951	25.3633	0.00019904	0.000578507	0	0	FALSE	FALSE	FALSE	FALSE	FALSE	FALSE
chr1	18678520	18679926	1407	*	mm10_rmsk	exon	6616		Lx5b	Lx5b_dup38	L1	LINE	-28502	RP24-284D7.1	ENSMUST00000189030.1	intergenic	intergenic	intergenic	1.90422	-1.42408	27.8417	1.91547e-06	0.000110797	0.335052	11.4671	61.8767	2.01907e-06	1.73251e-05	0	0	FALSE	FALSE	FALSE	FALSE	FALSE	FALSE
chr1	18681762	18683682	1921	*	mm10_rmsk	exon	7848		L1Md_F2	L1Md_F2_dup530	L1	LINE	-24746	RP24-284D7.1	ENSMUST00000189030.1	intergenic	intergenic	intergenic	1.23769	-1.3257	12.2795	0.000873621	0.01302	0.519061	15.1429	139.838	1.55383e-08	1.93193e-06	0	0	FALSE	FALSE	FALSE	FALSE	FALSE	FALSE
chr1	18699807	18703197	3391	*	mm10_rmsk	exon	17226		L1_Mus3	L1_Mus3_dup490	L1	LINE	-5231	RP24-284D7.1	ENSMUST00000189030.1	intergenic	intergenic	intergenic	1.0081	-0.916207	11.3063	0.00135107	0.0181011	0.491166	14.0232	104.073	9.55672e-08	3.14529e-06	0	0	FALSE	FALSE	FALSE	FALSE	FALSE	FALSE
chr1	18713193	18713972	780	*	mm10_rmsk	exon	1175		RLTR19-int	RLTR19-int_dup15	ERVK	LTR	4765	RP24-284D7.1	ENSMUST00000189030.1	intergenic	intergenic	intergenic	1.92281	-2.52391	9.77617	0.00272813	0.0304567	0.0935097	9.09847	12.6633	0.00328211	0.0064774	1.12529e-304	5.19013e-304	FALSE	FALSE	FALSE	FALSE	FALSE	FALSE
chr1	18715053	18717051	1999	*	mm10_rmsk	exon	31024		L1_Mus1	L1_Mus1_dup294	L1	LINE	6625	RP24-284D7.1	ENSMUST00000189030.1	intergenic	intergenic	intergenic	1.32784	-1.24396	14.1285	0.000389759	0.00698329	0.568501	13.4728	115.916	4.95501e-08	3.05101e-06	0	0	FALSE	FALSE	FALSE	FALSE	FALSE	FALSE
chr1	18771580	18772200	621	*	mm10_rmsk	exon	3300		Lx2	Lx2_dup148	L1	LINE	63152	RP24-284D7.1	ENSMUST00000189030.1	intergenic	intergenic	intergenic	1.4339	-2.15044	9.00226	0.00392675	0.0395382	0.329614	12.88	47.1621	9.02254e-06	5.15113e-05	0	0	FALSE	FALSE	FALSE	FALSE	FALSE	FALSE
chr1	18775645	18777117	1473	*	mm10_rmsk	exon	7730		L1_Mus3	L1_Mus3_dup497	L1	LINE	67217	RP24-284D7.1	ENSMUST00000189030.1	intergenic	intergenic	intergenic	-1.10884	0.177939	18.6349	6.03558e-05	0.00160498	0.491166	14.0232	104.073	9.55672e-08	3.14529e-06	0	0	TRUE	FALSE	TRUE	FALSE	FALSE	FALSE
chr1	18782137	18783192	1056	*	mm10_rmsk	exon	7739		L1_Mus2	L1_Mus2_dup218	L1	LINE	73709	RP24-284D7.1	ENSMUST00000189030.1	intergenic	intergenic	intergenic	1.58752	-1.6037	16.2471	0.000159465	0.00345801	0.484439	13.0175	105.113	8.99763e-08	3.05101e-06	0	0	FALSE	FALSE	FALSE	FALSE	TRUE	FALSE
chr1	18785210	18788119	2910	*	mm10_rmsk	exon	13253		Lx2B	Lx2B_dup27	L1	LINE	76782	RP24-284D7.1	ENSMUST00000189030.1	intergenic	intergenic	intergenic	1.14607	-1.11945	11.6964	0.00113331	0.0158699	0.21701	11.4789	26.956	0.000150288	0.000460745	0	0	FALSE	FALSE	FALSE	FALSE	FALSE	FALSE
chr1	18810534	18812294	1761	*	mm10_rmsk	exon	13650		L1_Mus2	L1_Mus2_dup224	L1	LINE	102106	RP24-284D7.1	ENSMUST00000189030.1	intergenic	intergenic	intergenic	1.16346	-1.13136	10.816	0.00168824	0.0213639	0.484439	13.0175	105.113	8.99763e-08	3.05101e-06	0	0	FALSE	FALSE	FALSE	FALSE	TRUE	FALSE
chr1	18838136	18841309	3174	*	mm10_rmsk	exon	29769		L1_Mus3	L1_Mus3_dup503	L1	LINE	-128524	Gm24075	ENSMUST00000158175.1	intergenic	intergenic	intergenic	1.00404	-0.753451	11.4486	0.00126694	0.0172491	0.491166	14.0232	104.073	9.55672e-08	3.14529e-06	0	0	FALSE	FALSE	FALSE	FALSE	FALSE	FALSE
chr1	18890270	18891200	931	*	mm10_rmsk	exon	3736		L1VL1	L1VL1_dup44	L1	LINE	-78633	Gm24075	ENSMUST00000158175.1	intergenic	intergenic	intergenic	1.55009	-1.75408	14.7915	0.000293665	0.00559207	0.408941	9.79875	95.693	1.58574e-07	3.87825e-06	0	0	FALSE	FALSE	FALSE	FALSE	FALSE	FALSE
chr1	18901507	18902192	686	*	mm10_rmsk	exon	4241		Lx4A	Lx4A_dup58	L1	LINE	-67641	Gm24075	ENSMUST00000158175.1	intergenic	intergenic	intergenic	1.40762	-1.87752	11.1305	0.00146301	0.0192059	0.386963	11.9984	67.5375	1.22707e-06	1.22598e-05	0	0	FALSE	FALSE	FALSE	FALSE	FALSE	FALSE
chr1	19009979	19011048	1070	*	mm10_rmsk	exon	4127		Lx9	Lx9_dup304	L1	LINE	-26218	RP23-122B3.1	ENSMUST00000185386.1	intergenic	intergenic	intergenic	1.36416	-1.99493	9.2583	0.00347859	0.0362726	0.366266	13.1834	126.776	2.85574e-08	2.45813e-06	0	0	FALSE	FALSE	FALSE	FALSE	FALSE	FALSE
chr1	19050014	19054398	4385	*	mm10_rmsk	exon	30117		L1Md_F2	L1Md_F2_dup556	L1	LINE	-8459	RP23-122B3.2	ENSMUST00000185704.1	intergenic	intergenic	intergenic	1.20853	-0.764187	15.2761	0.000239258	0.00476263	0.519061	15.1429	139.838	1.55383e-08	1.93193e-06	0	0	FALSE	FALSE	FALSE	FALSE	FALSE	FALSE
chr1	19054400	19055373	974	*	mm10_rmsk	exon	7436		L1Md_F2	L1Md_F2_dup557	L1	LINE	-7484	RP23-122B3.2	ENSMUST00000185704.1	intergenic	intergenic	intergenic	1.51035	-1.52143	16.0085	0.000176071	0.00373919	0.519061	15.1429	139.838	1.55383e-08	1.93193e-06	0	0	FALSE	FALSE	FALSE	FALSE	FALSE	FALSE
chr1	19063794	19065027	1234	*	mm10_rmsk	exon	7172		Lx3A	Lx3A_dup46	L1	LINE	937	RP23-122B3.2	ENSMUST00000185704.1	exonic	proximal <=1000bp	Tss_prox_1kbp	1.76852	-1.53569	19.1724	4.87341e-05	0.00135622	0.471895	11.8934	70.5091	9.58045e-07	1.0572e-05	0	0	FALSE	FALSE	FALSE	FALSE	FALSE	FALSE
chr1	19139202	19139400	199	*	mm10_rmsk	exon	541		B3A	B3A_dup393	B2	SINE	-14566	AC098736.2	ENSMUST00000162030.1	intronic	intronic	gene_body	-1.25223	-0.768977	15.8178	0.000190645	0.00398277	-0.0693289	14.2699	6.57714	0.0228853	0.0371879	0	0	TRUE	TRUE	TRUE	FALSE	FALSE	TRUE
chr1	19171664	19172733	1070	*	mm10_rmsk	exon	7956		L1_Mus1	L1_Mus1_dup313	L1	LINE	17698	AC098736.2	ENSMUST00000162030.1	intergenic	intergenic	intergenic	1.16914	-1.60455	9.00843	0.00391528	0.0394569	0.568501	13.4728	115.916	4.95501e-08	3.05101e-06	0	0	FALSE	FALSE	FALSE	FALSE	FALSE	FALSE
chr1	19208914	19208981	68	*	mm10_rmsk	exon	295		RLTR20A4	RLTR20A4_dup37	ERVK	LTR	0	Tfap2b	ENSMUST00000027059.10	exonic	TSS	Tss_prox_1kbp	-1.32786	-1.89692	9.14372	0.00367213	0.0376922	0.387782	10.2057	72.6076	8.08689e-07	9.69813e-06	0	0	FALSE	FALSE	FALSE	FALSE	TRUE	TRUE
chr1	19227700	19227832	133	*	mm10_rmsk	exon	774		B1_Mus1	B1_Mus1_dup481	Alu	SINE	13821	Tfap2b	ENSMUST00000186972.1	intronic	intronic	gene_body	-1.79546	-2.37492	8.99072	0.00394832	0.0396902	-0.146129	14.2108	8.59991	0.011203	0.0196492	0	0	FALSE	FALSE	FALSE	FALSE	TRUE	FALSE
chr1	19264638	19265262	625	*	mm10_rmsk	exon	4673		Lx2	Lx2_dup154	L1	LINE	21913	RP24-119I6.2	ENSMUST00000189218.1	intergenic	intergenic	intergenic	-1.1902	0.622494	24.5807	6.19292e-06	0.000270544	0.329614	12.88	47.1621	9.02254e-06	5.15113e-05	0	0	TRUE	FALSE	TRUE	FALSE	FALSE	FALSE
chr1	19265719	19265917	199	*	mm10_rmsk	exon	752		B3	B3_dup613	B2	SINE	22994	RP24-119I6.2	ENSMUST00000189218.1	intergenic	intergenic	intergenic	-1.34336	-0.480706	20.0617	3.43382e-05	0.00102811	-0.0408682	15.0047	1.97967	0.18188	0.229711	0	0	TRUE	FALSE	FALSE	FALSE	FALSE	FALSE
chr1	19266041	19266216	176	*	mm10_rmsk	exon	381		B3A	B3A_dup397	B2	SINE	23316	RP24-119I6.2	ENSMUST00000189218.1	intergenic	intergenic	intergenic	-1.27313	-0.869694	14.9401	0.000275736	0.00532029	-0.0693289	14.2699	6.57714	0.0228853	0.0371879	0	0	FALSE	FALSE	FALSE	FALSE	TRUE	TRUE
chr1	19289648	19290232	585	*	mm10_rmsk	exon	3669		Lx2	Lx2_dup155	L1	LINE	-30465	RP24-119I6.4	ENSMUST00000190883.1	intergenic	intergenic	intergenic	-1.1993	-0.559944	17.7613	8.57596e-05	0.00212212	0.329614	12.88	47.1621	9.02254e-06	5.15113e-05	0	0	TRUE	FALSE	TRUE	FALSE	FALSE	FALSE
chr1	19290262	19290430	169	*	mm10_rmsk	exon	849		B3A	B3A_dup398	B2	SINE	-30267	RP24-119I6.4	ENSMUST00000190883.1	intergenic	intergenic	intergenic	-1.02084	-0.845768	10.4105	0.00203315	0.0245331	-0.0693289	14.2699	6.57714	0.0228853	0.0371879	0	0	TRUE	TRUE	TRUE	FALSE	FALSE	FALSE
chr1	19330599	19330749	151	*	mm10_rmsk	exon	1078		B2_Mm2	B2_Mm2_dup399	B2	SINE	-190	RP24-119I6.5	ENSMUST00000188428.1	intergenic	proximal <=1000bp	Tss_prox_1kbp	-1.51965	-1.42499	15.727	0.000198013	0.0041014	0.10167	14.026	5.41603	0.0359684	0.0559787	0	0	FALSE	FALSE	FALSE	FALSE	FALSE	FALSE
chr1	19330751	19330822	72	*	mm10_rmsk	exon	240		Lx9	Lx9_dup310	L1	LINE	-117	RP24-119I6.5	ENSMUST00000188428.1	intergenic	proximal <=1000bp	Tss_prox_1kbp	-1.92419	-1.53581	19.8516	3.72833e-05	0.00109645	0.366266	13.1834	126.776	2.85574e-08	2.45813e-06	0	0	FALSE	FALSE	FALSE	FALSE	FALSE	FALSE
chr1	19345128	19345531	404	*	mm10_rmsk	exon	1861		Lx5c	Lx5c_dup150	L1	LINE	14189	RP24-119I6.5	ENSMUST00000188428.1	intergenic	intergenic	intergenic	-1.0674	0.507184	21.4536	2.00289e-05	0.000672177	0.275621	12.3036	49.7246	6.78061e-06	4.22898e-05	0	0	TRUE	FALSE	TRUE	FALSE	FALSE	FALSE
chr1	19361332	19361415	84	*	mm10_rmsk	exon	298		PB1D7	PB1D7_dup99	Alu	SINE	30393	RP24-119I6.5	ENSMUST00000188428.1	intergenic	intergenic	intergenic	-3.0302	-2.54855	18.8031	5.6437e-05	0.00152388	-0.319159	12.459	36.3072	3.53263e-05	0.000141179	0	0	FALSE	FALSE	FALSE	FALSE	FALSE	FALSE
chr1	19361416	19361444	29	*	mm10_rmsk	exon	19906		L1_Mus2	L1_Mus2_dup246	L1	LINE	30477	RP24-119I6.5	ENSMUST00000188428.1	intergenic	intergenic	intergenic	-4.28094	-2.78685	19.2009	4.81875e-05	0.00134413	0.484439	13.0175	105.113	8.99763e-08	3.05101e-06	0	0	FALSE	FALSE	FALSE	FALSE	FALSE	FALSE
chr1	19361445	19361549	105	*	mm10_rmsk	exon	306		PB1D10	PB1D10_dup299	Alu	SINE	30506	RP24-119I6.5	ENSMUST00000188428.1	intergenic	intergenic	intergenic	-2.77961	-2.52454	16.5713	0.000139457	0.00311195	-0.196601	13.5951	25.3633	0.00019904	0.000578507	0	0	FALSE	FALSE	FALSE	FALSE	FALSE	FALSE
chr1	19405050	19407304	2255	*	mm10_rmsk	exon	9810		L1_Mus2	L1_Mus2_dup248	L1	LINE	74111	RP24-119I6.5	ENSMUST00000188428.1	intergenic	intergenic	intergenic	1.00589	-1.21011	8.73163	0.0044668	0.0433053	0.484439	13.0175	105.113	8.99763e-08	3.05101e-06	0	0	FALSE	FALSE	FALSE	FALSE	FALSE	FALSE
chr1	19531254	19532398	1145	*	mm10_rmsk	exon	600		L1MEd	L1MEd_dup17	L1	LINE	17335	Gm24633	ENSMUST00000122719.1	intergenic	intergenic	intergenic	-1.22512	1.19017	25.7585	4.0305e-06	0.000194815	0.0168898	8.75908	0.183136	0.675395	0.709641	5.4156e-266	2.20131e-265	TRUE	TRUE	TRUE	FALSE	FALSE	FALSE
chr1	19636653	19636978	326	*	mm10_rmsk	exon	1680		RLTRETN_Mm	RLTRETN_Mm_dup32	ERVK	LTR	22384	RP24-132H2.1	ENSMUST00000193790.1	intergenic	intergenic	intergenic	-1.16751	-0.510193	18.3579	6.74329e-05	0.00175527	-0.536374	9.3262	60.9698	2.73033e-06	2.18231e-05	0	0	TRUE	FALSE	TRUE	FALSE	FALSE	FALSE
chr1	19652251	19653690	1440	*	mm10_rmsk	exon	6932		L1VL1	L1VL1_dup48	L1	LINE	37982	RP24-132H2.1	ENSMUST00000193790.1	intergenic	intergenic	intergenic	1.39473	-1.75016	10.2928	0.00214654	0.0255417	0.408941	9.79875	95.693	1.58574e-07	3.87825e-06	0	0	FALSE	FALSE	FALSE	FALSE	FALSE	FALSE
chr1	19670849	19671876	1028	*	mm10_rmsk	exon	7800		L1_Mus1	L1_Mus1_dup332	L1	LINE	56580	RP24-132H2.1	ENSMUST00000193790.1	intergenic	intergenic	intergenic	1.36648	-1.87233	9.02332	0.0038877	0.0392727	0.568501	13.4728	115.916	4.95501e-08	3.05101e-06	0	0	FALSE	FALSE	FALSE	FALSE	TRUE	FALSE
chr1	19706892	19712226	5335	*	mm10_rmsk	exon	32073		L1Md_F2	L1Md_F2_dup576	L1	LINE	92623	RP24-132H2.1	ENSMUST00000193790.1	intergenic	intergenic	intergenic	1.03819	-0.184588	15.2254	0.000244421	0.0048425	0.519061	15.1429	139.838	1.55383e-08	1.93193e-06	0	0	FALSE	FALSE	FALSE	FALSE	FALSE	FALSE
chr1	19767163	19767418	256	*	mm10_rmsk	exon	905		Lx5	Lx5_dup118	L1	LINE	152894	RP24-132H2.1	ENSMUST00000193790.1	intergenic	intergenic	intergenic	-1.54847	-0.859417	25.3616	4.65479e-06	0.000217527	0.344861	12.7349	51.5136	5.59317e-06	3.66009e-05	0	0	TRUE	FALSE	TRUE	FALSE	FALSE	FALSE
chr1	19830508	19832613	2106	*	mm10_rmsk	exon	3157		Lx9	Lx9_dup325	L1	LINE	216239	RP24-132H2.1	ENSMUST00000193790.1	intergenic	intergenic	intergenic	1.25527	-1.41935	11.5067	0.00123424	0.0169172	0.366266	13.1834	126.776	2.85574e-08	2.45813e-06	0	0	FALSE	FALSE	FALSE	FALSE	FALSE	TRUE
chr1	19871659	19872617	959	*	mm10_rmsk	exon	7244		L1_Mus1	L1_Mus1_dup339	L1	LINE	-192931	RP23-245C4.1	ENSMUST00000194347.1	intergenic	intergenic	intergenic	1.66943	-1.68064	16.2421	0.00015979	0.00346406	0.568501	13.4728	115.916	4.95501e-08	3.05101e-06	0	0	FALSE	FALSE	FALSE	FALSE	FALSE	FALSE
chr1	19917490	19917897	408	*	mm10_rmsk	exon	2527		Lx	Lx_dup214	L1	LINE	-147651	RP23-245C4.1	ENSMUST00000194347.1	intergenic	intergenic	intergenic	-1.21663	-1.11659	14.0379	0.000405243	0.00719743	0.402447	13.336	70.3906	9.67384e-07	1.0572e-05	0	0	TRUE	FALSE	TRUE	FALSE	FALSE	FALSE
chr1	19929725	19929845	121	*	mm10_rmsk	exon	241		MER135	MER135_dup3	DNA	DNA	-135703	RP23-245C4.1	ENSMUST00000194347.1	intergenic	intergenic	intergenic	-2.70321	-1.03573	53.2904	7.78894e-10	6.22598e-07	-0.26654	5.41752	35.8604	3.76063e-05	0.000147927	3.73096e-44	6.28314e-44	TRUE	FALSE	TRUE	FALSE	FALSE	FALSE
chr1	19992968	19994280	1313	*	mm10_rmsk	exon	22673		L1_Mus1	L1_Mus1_dup344	L1	LINE	-71268	RP23-245C4.1	ENSMUST00000194347.1	intergenic	intergenic	intergenic	2.05655	-2.0561	18.5505	6.2425e-05	0.00164984	0.568501	13.4728	115.916	4.95501e-08	3.05101e-06	0	0	FALSE	FALSE	FALSE	FALSE	FALSE	FALSE
chr1	20022893	20029148	6256	*	mm10_rmsk	exon	36052		L1Md_F3	L1Md_F3_dup98	L1	LINE	-36400	RP23-245C4.1	ENSMUST00000194347.1	intergenic	intergenic	intergenic	1.10811	-0.209528	19.7028	3.95269e-05	0.00114793	0.366872	12.9043	105.583	8.75731e-08	3.05101e-06	0	0	FALSE	FALSE	FALSE	FALSE	FALSE	FALSE
chr1	20055372	20057339	1968	*	mm10_rmsk	exon	15872		L1_Mus3	L1_Mus3_dup540	L1	LINE	-8209	RP23-245C4.1	ENSMUST00000194347.1	intergenic	intergenic	intergenic	1.01407	-0.99268	10.3383	0.00210196	0.0251547	0.491166	14.0232	104.073	9.55672e-08	3.14529e-06	0	0	FALSE	FALSE	FALSE	FALSE	FALSE	FALSE
chr1	20062057	20062681	625	*	mm10_rmsk	exon	3717		Lx	Lx_dup215	L1	LINE	-2867	RP23-245C4.1	ENSMUST00000194347.1	exonic	exonic	gene_body	1.52968	-1.79598	13.0536	0.000621097	0.0100346	0.402447	13.336	70.3906	9.67384e-07	1.0572e-05	0	0	FALSE	FALSE	FALSE	FALSE	FALSE	FALSE
chr1	20077252	20079149	1898	*	mm10_rmsk	exon	6367		L1_Mus3	L1_Mus3_dup542	L1	LINE	11704	RP23-245C4.1	ENSMUST00000194347.1	intronic	intronic	gene_body	1.48628	-1.38189	15.4788	0.000219707	0.00445191	0.491166	14.0232	104.073	9.55672e-08	3.14529e-06	0	0	FALSE	FALSE	FALSE	FALSE	FALSE	FALSE
chr1	20177608	20177989	382	*	mm10_rmsk	exon	303		RLTR21	RLTR21_dup24	ERVK	LTR	112060	RP23-245C4.1	ENSMUST00000194347.1	intronic	intronic	gene_body	1.82023	-2.29572	11.9255	0.00102278	0.0146865	0.346067	9.30964	113.895	5.51853e-08	3.05101e-06	1.3611e-201	4.55044e-201	FALSE	FALSE	FALSE	FALSE	FALSE	FALSE
chr1	20204556	20204852	297	*	mm10_rmsk	exon	1899		L1_Mus1	L1_Mus1_dup357	L1	LINE	139008	RP23-245C4.1	ENSMUST00000194347.1	intronic	intronic	gene_body	2.37692	-2.6472	12.7202	0.000718982	0.0112178	0.568501	13.4728	115.916	4.95501e-08	3.05101e-06	0	0	FALSE	FALSE	FALSE	FALSE	FALSE	FALSE
chr1	20253751	20255644	1894	*	mm10_rmsk	exon	7617		Lx	Lx_dup216	L1	LINE	-100808	AC101789.2	ENSMUST00000161509.2	intronic	intronic	gene_body	-1.19127	-0.0423124	20.0594	3.4368e-05	0.00102887	0.402447	13.336	70.3906	9.67384e-07	1.0572e-05	0	0	TRUE	FALSE	TRUE	FALSE	TRUE	FALSE
chr1	20274321	20274546	226	*	mm10_rmsk	exon	380		MIR	MIR_dup147	MIR	SINE	-81906	AC101789.2	ENSMUST00000161509.2	intronic	intronic	gene_body	-1.17598	0.517628	20.7504	2.62632e-05	0.000833126	-0.0763741	12.8857	8.72251	0.0107557	0.0189413	0	0	TRUE	TRUE	TRUE	FALSE	FALSE	FALSE
chr1	20290063	20290858	796	*	mm10_rmsk	exon	3789		L1Md_F	L1Md_F_dup45	L1	LINE	-65594	AC101789.2	ENSMUST00000161509.2	intronic	intronic	gene_body	1.75369	-2.16885	13.2376	0.000573119	0.00942966	0.68782	11.2456	113.731	7.70863e-08	3.05101e-06	0	0	FALSE	FALSE	FALSE	FALSE	FALSE	FALSE
chr1	20295227	20296849	1623	*	mm10_rmsk	exon	20486		L1_Mus1	L1_Mus1_dup361	L1	LINE	-59603	AC101789.2	ENSMUST00000161509.2	intronic	intronic	gene_body	1.56893	-1.21933	20.6332	2.74842e-05	0.0008638	0.568501	13.4728	115.916	4.95501e-08	3.05101e-06	0	0	FALSE	FALSE	FALSE	FALSE	FALSE	FALSE
chr1	20321668	20322919	1252	*	mm10_rmsk	exon	6794		L1_Mus2	L1_Mus2_dup269	L1	LINE	-33533	AC101789.2	ENSMUST00000161509.2	intronic	intronic	gene_body	1.33017	-1.70098	11.0087	0.00154625	0.0200154	0.484439	13.0175	105.113	8.99763e-08	3.05101e-06	0	0	FALSE	FALSE	FALSE	FALSE	FALSE	FALSE
chr1	20339651	20343118	3468	*	mm10_rmsk	exon	19065		L1_Mus1	L1_Mus1_dup363	L1	LINE	-13334	AC101789.2	ENSMUST00000161509.2	intronic	intronic	gene_body	1.03892	-0.804303	11.6065	0.00117999	0.016352	0.568501	13.4728	115.916	4.95501e-08	3.05101e-06	0	0	FALSE	FALSE	FALSE	FALSE	FALSE	FALSE
chr1	20384807	20387391	2585	*	mm10_rmsk	exon	22118		L1_Mus1	L1_Mus1_dup366	L1	LINE	-22057	Pkhd1	ENSMUST00000132647.1	intronic	intronic	gene_body	1.23664	-1.47317	11.3943	0.00129837	0.0175629	0.568501	13.4728	115.916	4.95501e-08	3.05101e-06	0	0	FALSE	FALSE	FALSE	FALSE	FALSE	FALSE
chr1	20389195	20390427	1233	*	mm10_rmsk	exon	4948		L1VL4	L1VL4_dup79	L1	LINE	-19021	Pkhd1	ENSMUST00000132647.1	intronic	intronic	gene_body	1.45505	-1.52795	13.0709	0.000616408	0.00997636	0.46762	11.3684	120.293	3.9467e-08	2.94424e-06	0	0	FALSE	FALSE	FALSE	FALSE	FALSE	FALSE
chr1	20398791	20401443	2653	*	mm10_rmsk	exon	13835		L1_Mus3	L1_Mus3_dup559	L1	LINE	-8005	Pkhd1	ENSMUST00000132647.1	intronic	intronic	gene_body	1.2032	-0.908076	14.4311	0.000342379	0.00630849	0.491166	14.0232	104.073	9.55672e-08	3.14529e-06	0	0	FALSE	FALSE	FALSE	FALSE	FALSE	FALSE
chr1	20515467	20518175	2709	*	mm10_rmsk	exon	14547		Lx6	Lx6_dup182	L1	LINE	70555	Gm24162	ENSMUST00000093665.1	intronic	intronic	gene_body	-1.29314	1.67684	27.8732	1.89432e-06	0.000109883	0.298114	12.3587	77.597	5.49313e-07	7.53997e-06	0	0	TRUE	TRUE	TRUE	FALSE	FALSE	FALSE
chr1	20544547	20544692	146	*	mm10_rmsk	exon	466		MER5A1	MER5A1_dup24	hAT-Charlie	DNA	-73348	Pkhd1	ENSMUST00000128051.1	intronic	intronic	gene_body	-1.45209	-0.706672	23.3318	9.83775e-06	0.000387053	-0.227116	9.59932	69.8145	1.01429e-06	1.08094e-05	0	0	TRUE	TRUE	TRUE	FALSE	FALSE	FALSE
chr1	20593196	20593703	508	*	mm10_rmsk	exon	1158		RLTR20A2B_MM	RLTR20A2B_MM_dup2	ERVK	LTR	-24337	Pkhd1	ENSMUST00000128051.1	exonic	exonic	gene_body	-1.32452	1.57753	28.8937	1.32525e-06	8.42604e-05	-0.933051	8.73974	47.9439	3.4392e-05	0.000138434	1.20836e-301	5.52812e-301	TRUE	TRUE	TRUE	FALSE	FALSE	FALSE
chr1	20649575	20651063	1489	*	mm10_rmsk	exon	7206		L1_Mus3	L1_Mus3_dup563	L1	LINE	-18819	Lincmd1	ENSMUST00000227082.1	intergenic	intergenic	intergenic	1.33355	-1.74438	9.31477	0.00338718	0.0355919	0.491166	14.0232	104.073	9.55672e-08	3.14529e-06	0	0	FALSE	FALSE	FALSE	FALSE	FALSE	FALSE
chr1	20665620	20666108	489	*	mm10_rmsk	exon	1253		Lx10	Lx10_dup67	L1	LINE	-3774	Lincmd1	ENSMUST00000227082.1	intergenic	intergenic	intergenic	-1.59231	0.92563	35.5031	1.45188e-07	1.71393e-05	0.382526	10.7781	149.374	1.02894e-08	1.64483e-06	0	0	TRUE	TRUE	TRUE	FALSE	FALSE	FALSE
chr1	20729097	20729282	186	*	mm10_rmsk	exon	1410		B2_Mm2	B2_Mm2_dup420	B2	SINE	-1623	Il17a	ENSMUST00000027061.4	intergenic	intergenic	intergenic	-1.64427	-0.658653	28.7411	1.39758e-06	8.76843e-05	0.10167	14.026	5.41603	0.0359684	0.0559787	0	0	TRUE	FALSE	TRUE	FALSE	FALSE	FALSE
chr1	20743636	20743924	289	*	mm10_rmsk	exon	388		L2	L2_dup112	L2	LINE	12731	Il17a	ENSMUST00000027061.4	intergenic	intergenic	intergenic	-1.9325	-1.50252	20.3115	3.11466e-05	0.000952405	-0.0530077	12.0044	4.68269	0.0488031	0.0729114	0	0	TRUE	FALSE	TRUE	FALSE	FALSE	FALSE
chr1	20751331	20753579	2249	*	mm10_rmsk	exon	9087		Lx5c	Lx5c_dup163	L1	LINE	20426	Il17a	ENSMUST00000027061.4	intergenic	intergenic	intergenic	-1.10135	1.21765	19.9889	3.53303e-05	0.00105114	0.275621	12.3036	49.7246	6.78061e-06	4.22898e-05	0	0	TRUE	TRUE	TRUE	FALSE	FALSE	FALSE
chr1	20756299	20756402	104	*	mm10_rmsk	exon	357		PB1D10	PB1D10_dup316	Alu	SINE	-23152	Il17f	ENSMUST00000191111.1	intergenic	intergenic	intergenic	-1.55645	-0.546629	28.595	1.47066e-06	9.10167e-05	-0.196601	13.5951	25.3633	0.00019904	0.000578507	0	0	FALSE	FALSE	FALSE	FALSE	FALSE	FALSE
chr1	20756763	20757313	551	*	mm10_rmsk	exon	2804		RMER15	RMER15_dup92	ERVL	LTR	-22241	Il17f	ENSMUST00000191111.1	intergenic	intergenic	intergenic	-1.14588	3.47062	18.8053	5.63887e-05	0.00152293	-0.386955	12.6786	57.0863	3.17301e-06	2.43192e-05	0	0	TRUE	TRUE	TRUE	FALSE	FALSE	TRUE
chr1	20761896	20761941	46	*	mm10_rmsk	exon	241		ZP3AR	ZP3AR_dup3	Satellite	Satellite	-17613	Il17f	ENSMUST00000191111.1	intergenic	intergenic	intergenic	-2.01489	-2.05636	13.7385	0.00046109	0.00795814	-0.832792	11.7263	23.3378	0.000674986	0.00161513	0	0	TRUE	FALSE	TRUE	FALSE	FALSE	FALSE
chr1	20761902	20761951	50	*	mm10_rmsk	exon	215		ID4	ID4_dup126	ID	SINE	-17603	Il17f	ENSMUST00000191111.1	intergenic	intergenic	intergenic	-1.65045	-1.99978	11.1905	0.00142375	0.0188299	-0.164001	11.9037	24.9939	0.000212806	0.000611037	0	0	TRUE	FALSE	TRUE	FALSE	FALSE	FALSE
chr1	20786620	20787025	406	*	mm10_rmsk	exon	1914		RMER10B	RMER10B_dup21	ERVL	LTR	2350	Il17f	ENSMUST00000039046.9	intronic	intronic	gene_body	-1.03521	0.217223	14.3961	0.00034755	0.00638277	-0.184869	9.88573	39.0409	2.43875e-05	0.000107064	0	0	TRUE	FALSE	TRUE	FALSE	FALSE	FALSE
chr1	20797038	20797161	124	*	mm10_rmsk	exon	406		MER2B	MER2B_dup7	TcMar-Tigger	DNA	6421	Il17f	ENSMUST00000189301.1	intergenic	intergenic	intergenic	-1.70187	-1.94736	12.5564	0.000772829	0.0118527	0.154212	7.17102	12.6175	0.00332379	0.00654811	3.90243e-99	9.09225e-99	FALSE	FALSE	FALSE	FALSE	FALSE	FALSE
chr1	20859877	20860256	380	*	mm10_rmsk	exon	511		MLTR11B	MLTR11B_dup26	ERVK	LTR	17211	Gm24723	ENSMUST00000158233.1	intergenic	intergenic	intergenic	-1.20347	2.59506	22.2334	1.4876e-05	0.000533003	-0.102045	10.1734	11.5685	0.00446739	0.00854532	0	0	TRUE	TRUE	TRUE	FALSE	FALSE	FALSE
chr1	20907736	20907863	128	*	mm10_rmsk	exon	589		B1_Mus1	B1_Mus1_dup512	Alu	SINE	-7677	Gm24171	ENSMUST00000104126.1	intronic	intronic	gene_body	-1.35831	-0.979772	17.0087	0.000116512	0.00270019	-0.146129	14.2108	8.59991	0.011203	0.0196492	0	0	FALSE	FALSE	FALSE	FALSE	FALSE	FALSE
chr1	20908885	20908977	93	*	mm10_rmsk	exon	304		PB1D7	PB1D7_dup107	Alu	SINE	-6563	Gm24171	ENSMUST00000104126.1	intronic	intronic	gene_body	-1.59123	0.168475	38.1487	6.27078e-08	9.5484e-06	-0.319159	12.459	36.3072	3.53263e-05	0.000141179	0	0	TRUE	FALSE	TRUE	FALSE	FALSE	FALSE
chr1	20916699	20917093	395	*	mm10_rmsk	exon	412		L1ME3C	L1ME3C_dup2	L1	LINE	-747	Paqr8	ENSMUST00000068880.13	intronic	proximal <=1000bp	Tss_prox_1kbp	1.784	-2.54403	9.38719	0.0032736	0.0347491	0.0957278	5.7514	5.28477	0.0379419	0.0585613	1.98781e-21	2.76288e-21	FALSE	FALSE	FALSE	TRUE	FALSE	FALSE
chr1	20940723	20940929	207	*	mm10_rmsk	exon	958		B3	B3_dup683	B2	SINE	-4782	RP23-191A12.6	ENSMUST00000185639.1	intergenic	intergenic	intergenic	-1.11696	-0.019586	15.0081	0.000267907	0.00520325	-0.0408682	15.0047	1.97967	0.18188	0.229711	0	0	FALSE	FALSE	FALSE	FALSE	FALSE	TRUE
chr1	20940935	20941119	185	*	mm10_rmsk	exon	686		ID_B1	ID_B1_dup484	B4	SINE	-4592	RP23-191A12.6	ENSMUST00000185639.1	intergenic	intergenic	intergenic	-1.04121	-1.01652	8.56046	0.00484814	0.0458797	-0.175808	14.6041	23.3246	0.000290382	0.000788684	0	0	FALSE	FALSE	FALSE	FALSE	FALSE	FALSE
chr1	20961778	20962198	421	*	mm10_rmsk	exon	2619		MTC	MTC_dup191	ERVL-MaLR	LTR	10090	Efhc1	ENSMUST00000038447.5	intronic	intronic	gene_body	1.38057	-1.84115	9.73784	0.00277738	0.0308552	-0.0712501	12.9646	7.63021	0.0156148	0.0261341	0	0	FALSE	FALSE	FALSE	FALSE	FALSE	FALSE
chr1	20981792	20982180	389	*	mm10_rmsk	exon	944		ORR1D2	ORR1D2_dup87	ERVL-MaLR	LTR	30104	Efhc1	ENSMUST00000038447.5	intronic	intronic	gene_body	-1.01733	-1.05185	9.55242	0.00302912	0.0328663	-0.192417	11.9933	47.1146	9.07148e-06	5.15279e-05	0	0	TRUE	FALSE	TRUE	FALSE	FALSE	FALSE
chr1	21080483	21080704	222	*	mm10_rmsk	exon	430		B4	B4_dup288	B4	SINE	369	RP24-278K16.1	ENSMUST00000186612.1	exonic	proximal <=1000bp	Tss_prox_1kbp	-1.21465	0.383766	24.1691	7.20715e-06	0.000304193	0.0559679	13.6316	3.88846	0.0693232	0.0998362	0	0	TRUE	FALSE	TRUE	FALSE	FALSE	FALSE
chr1	21085371	21085700	330	*	mm10_rmsk	exon	483		MLT1L	MLT1L_dup6	ERVL-MaLR	LTR	5257	RP24-278K16.1	ENSMUST00000186612.1	intergenic	intergenic	intergenic	1.7502	-2.32873	10.2888	0.00215053	0.0255771	-0.483859	9.00869	107.871	7.68745e-08	3.05101e-06	7.13719e-284	3.10193e-283	FALSE	FALSE	FALSE	FALSE	TRUE	TRUE
chr1	21093342	21093527	186	*	mm10_rmsk	exon	351		MLT1E1A	MLT1E1A_dup6	ERVL-MaLR	LTR	13228	RP24-278K16.1	ENSMUST00000186612.1	intergenic	intergenic	intergenic	-1.2505	0.707354	24.0865	7.43064e-06	0.000311496	-0.00309795	8.01602	0.00959315	0.923406	0.932573	2.11741e-141	5.86439e-141	TRUE	TRUE	TRUE	FALSE	FALSE	FALSE
chr1	21102158	21102322	165	*	mm10_rmsk	exon	555		RSINE1	RSINE1_dup501	B4	SINE	22044	RP24-278K16.1	ENSMUST00000186612.1	intergenic	intergenic	intergenic	-1.05711	-1.49368	8.31611	0.00545271	0.0497939	0.0578688	14.2698	3.88326	0.0694883	0.0999452	0	0	FALSE	FALSE	FALSE	FALSE	FALSE	TRUE
chr1	21124349	21124475	127	*	mm10_rmsk	exon	412		B1F	B1F_dup239	Alu	SINE	44235	RP24-278K16.1	ENSMUST00000186612.1	intergenic	intergenic	intergenic	-1.74087	-1.73554	16.1691	0.000164703	0.00354746	-0.210784	13.2074	26.2569	0.000169765	0.00050658	0	0	FALSE	FALSE	FALSE	FALSE	FALSE	FALSE
chr1	21124609	21124774	166	*	mm10_rmsk	exon	646		B3	B3_dup699	B2	SINE	44495	RP24-278K16.1	ENSMUST00000186612.1	intergenic	intergenic	intergenic	-1.53999	-1.34315	15.4493	0.000222443	0.00449474	-0.0408682	15.0047	1.97967	0.18188	0.229711	0	0	FALSE	FALSE	FALSE	FALSE	FALSE	FALSE
chr1	21161518	21161661	144	*	mm10_rmsk	exon	254		MIR	MIR_dup164	MIR	SINE	-17327	RP23-80N7.1	ENSMUST00000189119.1	intergenic	intergenic	intergenic	-2.08855	-1.94178	18.7795	5.69705e-05	0.001535	-0.0763741	12.8857	8.72251	0.0107557	0.0189413	0	0	FALSE	FALSE	FALSE	FALSE	FALSE	FALSE
chr1	21163116	21163453	338	*	mm10_rmsk	exon	1525		MTC	MTC_dup193	ERVL-MaLR	LTR	-15535	RP23-80N7.1	ENSMUST00000189119.1	intergenic	intergenic	intergenic	-1.13286	-0.565724	16.0716	0.000171514	0.00366253	-0.0712501	12.9646	7.63021	0.0156148	0.0261341	0	0	FALSE	FALSE	FALSE	FALSE	TRUE	TRUE
chr1	21203107	21203431	325	*	mm10_rmsk	exon	1473		RLTR11A	RLTR11A_dup14	ERVK	LTR	-15144	Tmem14a	ENSMUST00000027065.11	intergenic	intergenic	intergenic	1.87093	-2.60596	8.8783	0.00416508	0.0412198	-0.00505774	9.67275	0.0322877	0.860049	0.875701	0	0	FALSE	FALSE	FALSE	FALSE	FALSE	FALSE
chr1	21206320	21206715	396	*	mm10_rmsk	exon	1124		RLTR19-int	RLTR19-int_dup20	ERVK	LTR	-11860	Tmem14a	ENSMUST00000027065.11	intergenic	intergenic	intergenic	-1.35442	-1.30427	14.099	0.000394733	0.00705203	0.0935097	9.09847	12.6633	0.00328211	0.0064774	1.12529e-304	5.19013e-304	TRUE	FALSE	TRUE	FALSE	FALSE	FALSE
chr1	21239999	21240242	244	*	mm10_rmsk	exon	1103		RLTR49	RLTR49	ERVK	LTR	-347	Gsta3	ENSMUST00000027067.14	intergenic	proximal <=1000bp	Tss_prox_1kbp	-1.67819	0.0788411	37.9003	6.77818e-08	1.00714e-05	-0.165185	8.12129	30.3213	8.60523e-05	0.000292683	5.44981e-186	1.74456e-185	TRUE	FALSE	TRUE	TRUE	FALSE	TRUE
chr1	21240676	21240770	95	*	mm10_rmsk	exon	237		IMPB_01	IMPB_01_dup110	Satellite	Satellite	47	Gsta3	ENSMUST00000124990.2	intronic	proximal <=1000bp	Tss_prox_1kbp	-2.1182	-0.9316	42.588	1.61538e-08	3.87393e-06	0.274633	11.8608	41.784	1.71433e-05	8.23859e-05	0	0	FALSE	FALSE	FALSE	FALSE	FALSE	TRUE
chr1	21252103	21252209	107	*	mm10_rmsk	exon	305		RMER5	RMER5_dup45	ERV1	LTR	-1312	Gsta3	ENSMUST00000190711.1	intronic	intronic	gene_body	-1.38879	-1.59048	11.1525	0.00144851	0.0190664	-0.0928129	11.0315	12.5981	0.0033416	0.00657162	0	0	FALSE	FALSE	FALSE	FALSE	FALSE	FALSE
chr1	21303201	21303404	204	*	mm10_rmsk	exon	843		B3	B3_dup714	B2	SINE	4889	RP23-278E1.2	ENSMUST00000082032.12	intergenic	intergenic	intergenic	-1.65627	-1.24827	17.1084	0.000111852	0.00261354	-0.0408682	15.0047	1.97967	0.18188	0.229711	0	0	TRUE	TRUE	TRUE	FALSE	FALSE	FALSE
chr1	21303491	21303635	145	*	mm10_rmsk	exon	1205		B1_Mm	B1_Mm_dup253	Alu	SINE	5179	RP23-278E1.2	ENSMUST00000082032.12	intergenic	intergenic	intergenic	-1.11976	-1.21949	9.74922	0.00276266	0.0307335	-0.134862	12.9233	6.73414	0.0215837	0.0353101	0	0	TRUE	TRUE	TRUE	FALSE	FALSE	FALSE
chr1	21310417	21310802	386	*	mm10_rmsk	exon	1033		MTE2a	MTE2a_dup75	ERVL-MaLR	LTR	-5518	RP23-278E1.3	ENSMUST00000178260.1	intergenic	intergenic	intergenic	2.14572	-2.39609	13.3649	0.000542195	0.00902518	-0.169323	12.136	28.5191	0.000115331	0.000368901	0	0	FALSE	FALSE	FALSE	FALSE	FALSE	FALSE
chr1	21331793	21332205	413	*	mm10_rmsk	exon	3042		BGLII_Mus	BGLII_Mus_dup7	ERVK	LTR	15473	RP23-278E1.3	ENSMUST00000178260.1	intergenic	intergenic	intergenic	-1.04737	-0.975805	10.7527	0.00173775	0.0218303	-0.0922216	7.37727	6.31632	0.0252559	0.0404891	7.51783e-102	1.78095e-101	TRUE	FALSE	TRUE	FALSE	FALSE	FALSE
chr1	21333070	21333497	428	*	mm10_rmsk	exon	1933		RLTR20B5_MM	RLTR20B5_MM_dup4	ERVK	LTR	-16144	Khdc1a	ENSMUST00000088407.3	intergenic	intergenic	intergenic	-1.4073	-0.663568	20.9716	2.41106e-05	0.000778163	-0.3833	8.49627	54.6897	4.02561e-06	2.83312e-05	8.37247e-198	2.75026e-197	TRUE	FALSE	TRUE	FALSE	FALSE	TRUE
chr1	21333993	21334139	147	*	mm10_rmsk	exon	1122		B1_Mus2	B1_Mus2_dup367	Alu	SINE	-15502	Khdc1a	ENSMUST00000088407.3	intergenic	intergenic	intergenic	-1.01244	-1.13823	9.42221	0.0032201	0.0343345	-0.176162	13.8323	10.0652	0.00699884	0.0128811	0	0	FALSE	FALSE	FALSE	FALSE	FALSE	TRUE
chr1	21349552	21349657	106	*	mm10_rmsk	exon	329		B1F2	B1F2_dup80	Alu	SINE	0	Khdc1a	ENSMUST00000088407.3	exonic	TSS	Tss_prox_1kbp	-1.18801	-1.48012	9.51126	0.00308818	0.0333258	-0.209237	11.7791	21.8106	0.000389999	0.00100381	0	0	TRUE	FALSE	TRUE	FALSE	FALSE	FALSE
chr1	21368191	21368295	105	*	mm10_rmsk	exon	326		B1F2	B1F2_dup81	Alu	SINE	-36	Khdc1c	ENSMUST00000070223.5	intergenic	proximal <=1000bp	Tss_prox_1kbp	-1.75812	-1.71787	17.3115	0.000102953	0.0024497	-0.209237	11.7791	21.8106	0.000389999	0.00100381	0	0	TRUE	FALSE	FALSE	FALSE	FALSE	FALSE
chr1	21370912	21371058	147	*	mm10_rmsk	exon	1161		B1_Mm	B1_Mm_dup263	Alu	SINE	-1612	AC115920.8	ENSMUST00000142979.1	intergenic	intergenic	intergenic	-1.27798	-1.56507	8.97299	0.00398172	0.0399249	-0.134862	12.9233	6.73414	0.0215837	0.0353101	0	0	TRUE	FALSE	TRUE	FALSE	FALSE	FALSE
chr1	21380494	21380620	127	*	mm10_rmsk	exon	254		B1_Mur1	B1_Mur1_dup180	Alu	SINE	939	AC115920.9	ENSMUST00000140035.1	intergenic	proximal <=1000bp	Tss_prox_1kbp	-1.1995	-0.181088	18.4399	6.52515e-05	0.00170976	-0.179663	13.0741	14.4372	0.00205038	0.00424761	0	0	TRUE	FALSE	TRUE	FALSE	FALSE	FALSE
chr1	21393315	21393437	123	*	mm10_rmsk	exon	550		PB1D9	PB1D9_dup135	Alu	SINE	2409	AC115920.4	ENSMUST00000126985.2	intergenic	intergenic	intergenic	-1.6154	0.54083	37.4047	7.9212e-08	1.12017e-05	-0.245535	12.562	18.2067	0.000833525	0.00193109	0	0	TRUE	TRUE	TRUE	FALSE	FALSE	FALSE
chr1	21393828	21393974	147	*	mm10_rmsk	exon	808		B1_Mus1	B1_Mus1_dup540	Alu	SINE	2922	AC115920.4	ENSMUST00000126985.2	intergenic	intergenic	intergenic	-1.54666	-0.304495	30.7023	7.11264e-07	5.33466e-05	-0.146129	14.2108	8.59991	0.011203	0.0196492	0	0	FALSE	FALSE	FALSE	FALSE	FALSE	TRUE
chr1	21440269	21440402	134	*	mm10_rmsk	exon	1168		B1_Mm	B1_Mm_dup270	Alu	SINE	-16615	RP24-496H1.1	ENSMUST00000192487.1	intronic	intronic	gene_body	-1.07519	-0.725235	14.1028	0.000394088	0.00704328	-0.134862	12.9233	6.73414	0.0215837	0.0353101	0	0	TRUE	TRUE	TRUE	FALSE	FALSE	FALSE
chr1	21547705	21549666	1962	*	mm10_rmsk	exon	8144		Lx	Lx_dup221	L1	LINE	34649	AC115920.2	ENSMUST00000119064.1	intronic	intronic	gene_body	1.38387	-0.97026	18.6133	6.08781e-05	0.00161658	0.402447	13.336	70.3906	9.67384e-07	1.0572e-05	0	0	FALSE	FALSE	FALSE	FALSE	FALSE	FALSE
chr1	21551496	21552315	820	*	mm10_rmsk	exon	5768		Lx	Lx_dup222	L1	LINE	38440	AC115920.2	ENSMUST00000119064.1	intronic	intronic	gene_body	1.23191	-1.38838	12.2041	0.000903374	0.0133565	0.402447	13.336	70.3906	9.67384e-07	1.0572e-05	0	0	FALSE	FALSE	FALSE	FALSE	FALSE	FALSE
chr1	21569286	21570312	1027	*	mm10_rmsk	exon	6814		Lx3_Mus	Lx3_Mus_dup86	L1	LINE	56230	AC115920.2	ENSMUST00000119064.1	intronic	intronic	gene_body	1.3585	-1.71548	11.6945	0.00113426	0.0158804	0.490828	12.3525	77.1477	5.68276e-07	7.57815e-06	0	0	FALSE	FALSE	FALSE	FALSE	FALSE	FALSE
chr1	21572593	21573692	1100	*	mm10_rmsk	exon	30170		L1_Mus3	L1_Mus3_dup582	L1	LINE	59537	AC115920.2	ENSMUST00000119064.1	intronic	intronic	gene_body	1.8253	-1.89691	16.5648	0.000139834	0.00311879	0.491166	14.0232	104.073	9.55672e-08	3.14529e-06	0	0	FALSE	FALSE	FALSE	FALSE	FALSE	FALSE
chr1	21573693	21574477	785	*	mm10_rmsk	exon	4593		RMER17A	RMER17A_dup21	ERVK	LTR	60637	AC115920.2	ENSMUST00000119064.1	intronic	intronic	gene_body	1.20979	-1.73386	8.60775	0.00473949	0.0451427	0.207716	9.84061	2.87721	0.119699	0.160027	0	0	FALSE	FALSE	FALSE	FALSE	FALSE	FALSE
chr1	21625126	21626149	1024	*	mm10_rmsk	exon	4839		L1Md_F	L1Md_F_dup47	L1	LINE	112070	AC115920.2	ENSMUST00000119064.1	intronic	intronic	gene_body	1.25249	-1.57901	10.956	0.00158378	0.0203749	0.68782	11.2456	113.731	7.70863e-08	3.05101e-06	0	0	FALSE	FALSE	FALSE	FALSE	FALSE	FALSE
chr1	21679919	21680102	184	*	mm10_rmsk	exon	1146		B2_Mm2	B2_Mm2_dup456	B2	SINE	-160412	RP23-322P13.2	ENSMUST00000194737.1	intronic	intronic	gene_body	2.54234	-2.83784	10.0168	0.00243905	0.0280738	0.10167	14.026	5.41603	0.0359684	0.0559787	0	0	FALSE	FALSE	FALSE	FALSE	FALSE	FALSE
chr1	21682092	21682850	759	*	mm10_rmsk	exon	895		L1_Mur3	L1_Mur3_dup294	L1	LINE	-157664	RP23-322P13.2	ENSMUST00000194737.1	intronic	intronic	gene_body	2.03764	-2.0659	17.9542	7.93258e-05	0.0019958	0.334543	12.3059	85.3852	3.12894e-07	5.33454e-06	0	0	FALSE	FALSE	FALSE	FALSE	FALSE	FALSE
chr1	21866066	21866236	171	*	mm10_rmsk	exon	533		B3	B3_dup759	B2	SINE	10164	Kcnq5	ENSMUST00000134505.1	intronic	intronic	gene_body	2.07953	-2.68315	8.77194	0.00438166	0.0427307	-0.0408682	15.0047	1.97967	0.18188	0.229711	0	0	FALSE	FALSE	FALSE	FALSE	FALSE	FALSE
chr1	21896299	21896460	162	*	mm10_rmsk	exon	199		MIRc	MIRc_dup92	MIR	SINE	40397	Kcnq5	ENSMUST00000134505.1	intronic	intronic	gene_body	-1.45328	-0.689606	23.5063	9.21736e-06	0.000368226	-0.193248	12.2077	46.807	9.39595e-06	5.20085e-05	0	0	FALSE	FALSE	FALSE	FALSE	FALSE	FALSE
chr1	21901882	21902401	520	*	mm10_rmsk	exon	1323		Lx8	Lx8_dup373	L1	LINE	45980	Kcnq5	ENSMUST00000134505.1	intronic	intronic	gene_body	1.2709	-1.81717	8.97783	0.00397257	0.0398656	0.121817	13.7403	15.9377	0.00141182	0.00306763	0	0	FALSE	FALSE	FALSE	FALSE	FALSE	FALSE
chr1	21903900	21904218	319	*	mm10_rmsk	exon	1032		Lx8	Lx8_dup375	L1	LINE	47998	Kcnq5	ENSMUST00000134505.1	intronic	intronic	gene_body	2.15896	-2.26892	15.4681	0.000220698	0.00446751	0.121817	13.7403	15.9377	0.00141182	0.00306763	0	0	FALSE	FALSE	FALSE	TRUE	FALSE	FALSE
chr1	21978127	21978376	250	*	mm10_rmsk	exon	1236		Lx2	Lx2_dup172	L1	LINE	16185	Kcnq5	ENSMUST00000115300.7	intergenic	intergenic	intergenic	-1.63006	-1.70188	14.0632	0.000400846	0.00713537	0.329614	12.88	47.1621	9.02254e-06	5.15113e-05	0	0	FALSE	FALSE	FALSE	FALSE	FALSE	FALSE
chr1	21978374	21978562	189	*	mm10_rmsk	exon	1154		Lx2	Lx2_dup173	L1	LINE	16432	Kcnq5	ENSMUST00000115300.7	intergenic	intergenic	intergenic	-1.52657	-1.09633	18.5003	6.36927e-05	0.00167686	0.329614	12.88	47.1621	9.02254e-06	5.15113e-05	0	0	FALSE	FALSE	FALSE	FALSE	FALSE	FALSE
chr1	21982486	21983045	560	*	mm10_rmsk	exon	3500		Lx	Lx_dup225	L1	LINE	20544	Kcnq5	ENSMUST00000115300.7	intergenic	intergenic	intergenic	1.36646	-1.63756	12.4107	0.000824256	0.0124476	0.402447	13.336	70.3906	9.67384e-07	1.0572e-05	0	0	FALSE	FALSE	FALSE	FALSE	TRUE	FALSE
chr1	21989547	21990501	955	*	mm10_rmsk	exon	1972		Lx8	Lx8_dup380	L1	LINE	27605	Kcnq5	ENSMUST00000115300.7	intergenic	intergenic	intergenic	1.67953	-1.50308	19.0422	5.13166e-05	0.00141298	0.121817	13.7403	15.9377	0.00141182	0.00306763	0	0	FALSE	FALSE	FALSE	FALSE	FALSE	FALSE
chr1	22016494	22017131	638	*	mm10_rmsk	exon	2461		Lx5c	Lx5c_dup175	L1	LINE	-13484	RP24-78G8.1	ENSMUST00000189850.1	intergenic	intergenic	intergenic	1.52371	-2.27871	8.47714	0.00504598	0.0471647	0.275621	12.3036	49.7246	6.78061e-06	4.22898e-05	0	0	FALSE	FALSE	FALSE	FALSE	FALSE	FALSE
chr1	22027277	22027977	701	*	mm10_rmsk	exon	4834		Lx	Lx_dup229	L1	LINE	-2638	RP24-78G8.1	ENSMUST00000189850.1	intergenic	intergenic	intergenic	1.43384	-1.68007	12.1003	0.00094608	0.0138326	0.402447	13.336	70.3906	9.67384e-07	1.0572e-05	0	0	FALSE	FALSE	FALSE	FALSE	FALSE	FALSE
chr1	22108924	22109394	471	*	mm10_rmsk	exon	3985		MT2C_Mm	MT2C_Mm_dup14	ERVL	LTR	78309	RP24-78G8.1	ENSMUST00000189850.1	intergenic	intergenic	intergenic	1.4326	-2.06837	9.76606	0.00274103	0.0305627	0.454013	8.97036	62.0934	1.97958e-06	1.71717e-05	1.28916e-232	4.7451e-232	FALSE	FALSE	FALSE	FALSE	FALSE	FALSE
chr1	22137495	22138141	647	*	mm10_rmsk	exon	17051		L1_Mur2	L1_Mur2_dup151	L1	LINE	-99708	RP24-261D2.1	ENSMUST00000190225.1	intergenic	intergenic	intergenic	1.74525	-2.23832	10.9088	0.00161827	0.0206996	0.419816	12.2317	109.992	6.82796e-08	3.05101e-06	0	0	FALSE	FALSE	FALSE	FALSE	FALSE	FALSE
chr1	22254126	22254650	525	*	mm10_rmsk	exon	1249		RLTR16	RLTR16_dup9	ERVK	LTR	16277	RP24-261D2.1	ENSMUST00000190225.1	intergenic	intergenic	intergenic	-1.62773	0.862685	39.5808	4.02043e-08	7.0748e-06	-0.606175	9.71973	56.7447	7.17152e-06	4.38521e-05	0	0	TRUE	TRUE	TRUE	FALSE	FALSE	FALSE
chr1	22387077	22387698	622	*	mm10_rmsk	exon	3127		Lx4B	Lx4B_dup34	L1	LINE	-45145	Rims1	ENSMUST00000185942.1	intronic	intronic	gene_body	-1.29897	-0.405701	23.8493	8.11329e-06	0.000333754	0.306357	11.1248	45.7945	1.05621e-05	5.62807e-05	0	0	TRUE	TRUE	TRUE	FALSE	FALSE	FALSE
chr1	22521382	22522703	1322	*	mm10_rmsk	exon	7371		L1_Mus2	L1_Mus2_dup297	L1	LINE	88539	Rims1	ENSMUST00000185942.1	intronic	intronic	gene_body	1.7202	-2.0777	11.6435	0.00116054	0.0161538	0.484439	13.0175	105.113	8.99763e-08	3.05101e-06	0	0	FALSE	FALSE	FALSE	FALSE	FALSE	FALSE
chr1	22560368	22562497	2130	*	mm10_rmsk	exon	18281		L1_Mus1	L1_Mus1_dup401	L1	LINE	127525	Rims1	ENSMUST00000185942.1	intronic	intronic	gene_body	1.43683	-2.04847	9.42656	0.00321352	0.0342859	0.568501	13.4728	115.916	4.95501e-08	3.05101e-06	0	0	FALSE	FALSE	FALSE	FALSE	FALSE	FALSE
chr1	22778822	22780245	1424	*	mm10_rmsk	exon	6257		L1_Mus2	L1_Mus2_dup301	L1	LINE	-25479	Rims1	ENSMUST00000097808.6	intronic	intronic	gene_body	1.78327	-2.16186	11.7135	0.00112462	0.0157808	0.484439	13.0175	105.113	8.99763e-08	3.05101e-06	0	0	FALSE	FALSE	FALSE	FALSE	FALSE	FALSE
chr1	22834991	22838169	3179	*	mm10_rmsk	exon	31547		L1_Mus2	L1_Mus2_dup302	L1	LINE	28997	Rims1	ENSMUST00000218140.1	intergenic	intergenic	intergenic	1.09081	-1.42791	8.55965	0.00485003	0.0458914	0.484439	13.0175	105.113	8.99763e-08	3.05101e-06	0	0	FALSE	FALSE	FALSE	FALSE	FALSE	FALSE
chr1	22940545	22940721	177	*	mm10_rmsk	exon	873		Lx	Lx_dup233	L1	LINE	-46404	RP24-495G2.1	ENSMUST00000190510.1	intergenic	intergenic	intergenic	-1.30283	-1.70195	9.02864	0.00387791	0.0391996	0.402447	13.336	70.3906	9.67384e-07	1.0572e-05	0	0	FALSE	FALSE	TRUE	FALSE	TRUE	FALSE
chr1	22944636	22945270	635	*	mm10_rmsk	exon	3633		RLTR17	RLTR17_dup19	ERVK	LTR	-41855	RP24-495G2.1	ENSMUST00000190510.1	intergenic	intergenic	intergenic	-1.6577	-0.637618	30.044	8.90688e-07	6.29362e-05	-1.02879	11.7239	35.9714	0.000128195	0.000404086	0	0	TRUE	FALSE	TRUE	FALSE	FALSE	FALSE
chr1	22945271	22945797	527	*	mm10_rmsk	exon	3193		Lx2	Lx2_dup185	L1	LINE	-41328	RP24-495G2.1	ENSMUST00000190510.1	intergenic	intergenic	intergenic	-1.13077	-1.58613	8.69091	0.00455458	0.0438914	0.329614	12.88	47.1621	9.02254e-06	5.15113e-05	0	0	FALSE	FALSE	FALSE	FALSE	FALSE	FALSE
chr1	22953622	22953877	256	*	mm10_rmsk	exon	516		MLT1B	MLT1B_dup57	ERVL-MaLR	LTR	-33248	RP24-495G2.1	ENSMUST00000190510.1	intergenic	intergenic	intergenic	2.03342	-2.64456	9.48417	0.0031277	0.0336321	0.0498691	10.9914	2.636	0.127423	0.168742	0	0	FALSE	FALSE	FALSE	FALSE	FALSE	FALSE
chr1	22971122	22971394	273	*	mm10_rmsk	exon	2393		Lx2A1	Lx2A1_dup14	L1	LINE	-15731	RP24-495G2.1	ENSMUST00000190510.1	intergenic	intergenic	intergenic	1.47098	-2.20244	8.33774	0.00539614	0.0494328	-0.0369648	10.4239	0.553491	0.469563	0.522826	0	0	FALSE	FALSE	FALSE	FALSE	FALSE	FALSE
chr1	22971395	22972165	771	*	mm10_rmsk	exon	4493		RMER17D2	RMER17D2_dup37	ERVK	LTR	-14960	RP24-495G2.1	ENSMUST00000190510.1	intergenic	intergenic	intergenic	1.45871	-1.50361	14.259	0.000368538	0.0066833	0.296254	9.59916	6.55903	0.027266	0.043339	0	0	FALSE	TRUE	FALSE	FALSE	FALSE	FALSE
chr1	23061746	23061854	109	*	mm10_rmsk	exon	465		B1_Mur3	B1_Mur3_dup122	Alu	SINE	-40399	RP24-163I14.1	ENSMUST00000073179.5	intronic	intronic	gene_body	-1.15812	-1.15364	11.5987	0.00118413	0.0163945	-0.199309	12.3985	15.6938	0.00149799	0.00323602	0	0	FALSE	FALSE	FALSE	FALSE	FALSE	FALSE
chr1	23062326	23062433	108	*	mm10_rmsk	exon	182		L2c	L2c_dup68	L2	LINE	-39820	RP24-163I14.1	ENSMUST00000073179.5	intronic	intronic	gene_body	-1.04411	-0.373488	14.4336	0.000342019	0.00630363	-0.103946	11.2892	15.3661	0.00162344	0.00345367	0	0	FALSE	FALSE	FALSE	FALSE	FALSE	FALSE
chr1	23100670	23100804	135	*	mm10_rmsk	exon	333		MIRc	MIRc_dup99	MIR	SINE	-1449	RP24-163I14.1	ENSMUST00000073179.5	exonic	exonic	gene_body	-1.11717	-1.33957	9.51879	0.00307728	0.0332417	-0.193248	12.2077	46.807	9.39595e-06	5.20085e-05	0	0	FALSE	FALSE	FALSE	TRUE	FALSE	FALSE
chr1	23114935	23115117	183	*	mm10_rmsk	exon	540		B3A	B3A_dup516	B2	SINE	12682	RP24-163I14.1	ENSMUST00000073179.5	intronic	intronic	gene_body	-1.21377	-1.02478	13.6888	0.00047109	0.00809306	-0.0693289	14.2699	6.57714	0.0228853	0.0371879	0	0	TRUE	FALSE	TRUE	FALSE	FALSE	FALSE
chr1	23116229	23116316	88	*	mm10_rmsk	exon	311		MTE2a	MTE2a_dup85	ERVL-MaLR	LTR	13976	RP24-163I14.1	ENSMUST00000073179.5	intronic	intronic	gene_body	-1.21912	-1.22839	12.3449	0.000848647	0.0127298	-0.169323	12.136	28.5191	0.000115331	0.000368901	0	0	TRUE	FALSE	TRUE	FALSE	FALSE	FALSE
chr1	23211145	23211465	321	*	mm10_rmsk	exon	2467		ORR1A2	ORR1A2_dup91	ERVL-MaLR	LTR	-24208	RP24-495G2.2	ENSMUST00000191045.1	intronic	intronic	gene_body	1.35657	-2.04086	8.63599	0.00467582	0.0447222	0.24357	12.0424	33.976	4.92806e-05	0.000178463	0	0	FALSE	FALSE	FALSE	FALSE	FALSE	FALSE
chr1	23214105	23214178	74	*	mm10_rmsk	exon	184		AmnSINE1	AmnSINE1_dup10	Deu	SINE	-21495	RP24-495G2.2	ENSMUST00000191045.1	intronic	intronic	gene_body	-2.05081	-2.29481	13.8821	0.000433355	0.00758131	-0.404265	8.13954	83.2141	3.64352e-07	5.8515e-06	2.16138e-299	9.80868e-299	FALSE	FALSE	FALSE	FALSE	FALSE	FALSE
chr1	23246968	23247069	102	*	mm10_rmsk	exon	394		RSINE1	RSINE1_dup572	B4	SINE	1757	Gm24176	ENSMUST00000158928.1	intergenic	intergenic	intergenic	-1.05708	-0.25537	17.3547	0.000101155	0.00241598	0.0578688	14.2698	3.88326	0.0694883	0.0999452	0	0	TRUE	TRUE	TRUE	FALSE	FALSE	FALSE
chr1	23247089	23247268	180	*	mm10_rmsk	exon	728		MTD	MTD_dup364	ERVL-MaLR	LTR	1878	Gm24176	ENSMUST00000158928.1	intergenic	intergenic	intergenic	-1.07343	0.0969644	14.8301	0.000288889	0.00551914	-0.128328	13.8494	24.9898	0.000212962	0.000611037	0	0	TRUE	TRUE	TRUE	FALSE	FALSE	FALSE
chr1	23247409	23247555	147	*	mm10_rmsk	exon	1066		B1_Mur4	B1_Mur4_dup221	Alu	SINE	2198	Gm24176	ENSMUST00000158928.1	intergenic	intergenic	intergenic	-1.16527	-1.01407	13.749	0.000458995	0.00793071	-0.197949	13.0761	16.1554	0.00133973	0.00293351	0	0	FALSE	FALSE	TRUE	FALSE	FALSE	FALSE
chr1	23255506	23255616	111	*	mm10_rmsk	exon	401		PB1D10	PB1D10_dup372	Alu	SINE	-790	RP23-28L24.5	ENSMUST00000195365.1	intergenic	proximal <=1000bp	Tss_prox_1kbp	-1.04157	-0.917967	12.2674	0.000878341	0.0130716	-0.196601	13.5951	25.3633	0.00019904	0.000578507	0	0	FALSE	FALSE	FALSE	TRUE	FALSE	TRUE
chr1	23311290	23314025	2736	*	mm10_rmsk	exon	13835		L1_Mus3	L1_Mus3_dup613	L1	LINE	17561	RP23-28L24.8	ENSMUST00000190910.1	intergenic	intergenic	intergenic	1.46491	-0.91142	21.0326	2.35495e-05	0.000764169	0.491166	14.0232	104.073	9.55672e-08	3.14529e-06	0	0	FALSE	FALSE	FALSE	FALSE	FALSE	FALSE
chr1	23323882	23324027	146	*	mm10_rmsk	exon	1230		B1_Mus2	B1_Mus2_dup399	Alu	SINE	-22572	RP23-28L24.9	ENSMUST00000189078.1	intergenic	intergenic	intergenic	-1.31749	-0.619132	20.6749	2.7043e-05	0.000852679	-0.176162	13.8323	10.0652	0.00699884	0.0128811	0	0	FALSE	FALSE	TRUE	FALSE	FALSE	TRUE
chr1	23330479	23331269	791	*	mm10_rmsk	exon	3917		RMER21B	RMER21B	ERV1	LTR	-15330	RP23-28L24.9	ENSMUST00000189078.1	intergenic	intergenic	intergenic	-1.41175	3.64049	29.0227	1.26713e-06	8.14863e-05	-0.735048	10.2571	24.3006	0.000559755	0.0013698	0	0	TRUE	TRUE	TRUE	FALSE	FALSE	TRUE
chr1	23356216	23356336	121	*	mm10_rmsk	exon	578		B3	B3_dup819	B2	SINE	9617	RP23-28L24.9	ENSMUST00000189078.1	intergenic	intergenic	intergenic	-1.08017	-1.13184	9.01141	0.00390974	0.0394189	-0.0408682	15.0047	1.97967	0.18188	0.229711	0	0	TRUE	FALSE	FALSE	FALSE	FALSE	TRUE
chr1	23356399	23356551	153	*	mm10_rmsk	exon	711		B1_Mur3	B1_Mur3_dup123	Alu	SINE	9800	RP23-28L24.9	ENSMUST00000189078.1	intergenic	intergenic	intergenic	-1.19365	-1.68462	8.64628	0.00465286	0.0445655	-0.199309	12.3985	15.6938	0.00149799	0.00323602	0	0	FALSE	FALSE	FALSE	FALSE	FALSE	TRUE
chr1	23392074	23392175	102	*	mm10_rmsk	exon	263		LTR33A_	LTR33A__dup2	ERVL	LTR	-5366	Ogfrl1	ENSMUST00000188677.1	exonic	exonic	gene_body	-1.61986	-0.121344	28.6233	1.4562e-06	9.03108e-05	-0.45164	7.6136	66.2369	1.37143e-06	1.3053e-05	8.7016e-150	2.48303e-149	TRUE	FALSE	TRUE	FALSE	FALSE	FALSE
chr1	23424477	23424917	441	*	mm10_rmsk	exon	1280		RMER20C_Mm	RMER20C_Mm_dup7	ERVK	LTR	26705	Ogfrl1	ENSMUST00000189537.1	intergenic	intergenic	intergenic	1.85685	-2.10458	14.9085	0.000279448	0.00537747	-0.263126	9.68951	37.0604	3.18322e-05	0.000130957	0	0	FALSE	FALSE	FALSE	FALSE	FALSE	FALSE
chr1	23474627	23474766	140	*	mm10_rmsk	exon	326		B1F	B1F_dup264	Alu	SINE	-4773	RP24-361E14.1	ENSMUST00000180769.1	intergenic	intergenic	intergenic	-1.20838	-1.52424	8.97377	0.00398023	0.039916	-0.210784	13.2074	26.2569	0.000169765	0.00050658	0	0	FALSE	FALSE	FALSE	FALSE	FALSE	FALSE
chr1	23474797	23474913	117	*	mm10_rmsk	exon	331		B4A	B4A_dup538	B4	SINE	-4626	RP24-361E14.1	ENSMUST00000180769.1	intergenic	intergenic	intergenic	-1.16221	-0.900557	13.0925	0.000610616	0.00990455	0.0753296	14.4644	7.74941	0.0149756	0.0252756	0	0	TRUE	FALSE	TRUE	FALSE	FALSE	FALSE
chr1	23474924	23475050	127	*	mm10_rmsk	exon	329		L1MEd	L1MEd_dup20	L1	LINE	-4489	RP24-361E14.1	ENSMUST00000180769.1	intergenic	intergenic	intergenic	-1.4561	-0.609969	23.1729	1.04403e-05	0.000405254	0.0168898	8.75908	0.183136	0.675395	0.709641	5.4156e-266	2.20131e-265	TRUE	FALSE	TRUE	FALSE	FALSE	FALSE
chr1	23475081	23475342	262	*	mm10_rmsk	exon	329		L1MEd	L1MEd_dup21	L1	LINE	-4197	RP24-361E14.1	ENSMUST00000180769.1	intergenic	intergenic	intergenic	-1.08474	-0.232894	14.8458	0.000286978	0.00549006	0.0168898	8.75908	0.183136	0.675395	0.709641	5.4156e-266	2.20131e-265	TRUE	TRUE	TRUE	FALSE	FALSE	FALSE
chr1	23528538	23529982	1445	*	mm10_rmsk	exon	3840		ORR1E-int	ORR1E-int_dup8	ERVL-MaLR	LTR	-44605	RP23-25K16.1	ENSMUST00000191140.1	intergenic	intergenic	intergenic	1.40746	-1.75584	11.3444	0.00132798	0.0178635	0.0975535	8.89505	13.8735	0.00237235	0.00482665	8.21846e-269	3.41429e-268	FALSE	FALSE	FALSE	FALSE	FALSE	FALSE
chr1	23537002	23537392	391	*	mm10_rmsk	exon	1652		ORR1A3	ORR1A3_dup41	ERVL-MaLR	LTR	-37195	RP23-25K16.1	ENSMUST00000191140.1	intergenic	intergenic	intergenic	-1.5189	1.51408	37.9083	6.76114e-08	1.00543e-05	0.113205	10.224	11.7022	0.00429877	0.00826517	0	0	TRUE	TRUE	TRUE	FALSE	FALSE	TRUE
chr1	23539523	23539908	386	*	mm10_rmsk	exon	1717		ORR1B1	ORR1B1_dup120	ERVL-MaLR	LTR	-34679	RP23-25K16.1	ENSMUST00000191140.1	intergenic	intergenic	intergenic	-1.79457	1.1759	52.0059	1.10285e-09	7.66835e-07	-0.0271086	12.3851	0.725931	0.408968	0.463194	0	0	TRUE	TRUE	TRUE	FALSE	FALSE	FALSE
chr1	23540040	23540396	357	*	mm10_rmsk	exon	1130		MTD	MTD_dup373	ERVL-MaLR	LTR	-34191	RP23-25K16.1	ENSMUST00000191140.1	intergenic	intergenic	intergenic	-1.60782	-0.14901	32.3691	4.05574e-07	3.53884e-05	-0.128328	13.8494	24.9898	0.000212962	0.000611037	0	0	FALSE	FALSE	FALSE	FALSE	FALSE	FALSE
chr1	23542306	23542622	317	*	mm10_rmsk	exon	986		MTE2b	MTE2b_dup86	ERVL-MaLR	LTR	-31965	RP23-25K16.1	ENSMUST00000191140.1	intergenic	intergenic	intergenic	-1.39294	-0.216816	27.7187	2.00037e-06	0.000114423	-0.265936	12.1834	46.9875	9.20397e-06	5.1755e-05	0	0	TRUE	TRUE	TRUE	FALSE	FALSE	TRUE
chr1	23573367	23573481	115	*	mm10_rmsk	exon	458		RSINE1	RSINE1_dup582	B4	SINE	-1106	RP23-25K16.1	ENSMUST00000191140.1	intergenic	intergenic	intergenic	-1.69059	-1.70888	14.2027	0.000377549	0.00681096	0.0578688	14.2698	3.88326	0.0694883	0.0999452	0	0	FALSE	FALSE	TRUE	FALSE	TRUE	FALSE
chr1	23574055	23574212	158	*	mm10_rmsk	exon	331		Arthur1B	Arthur1B_dup7	hAT-Tip100	DNA	-375	RP23-25K16.1	ENSMUST00000191140.1	intergenic	proximal <=1000bp	Tss_prox_1kbp	-1.28116	-0.312927	21.7543	1.7852e-05	0.000614264	-0.107975	6.91813	12.0441	0.00390023	0.0075508	1.49431e-96	3.44607e-96	FALSE	FALSE	FALSE	FALSE	FALSE	TRUE
chr1	23574719	23574772	54	*	mm10_rmsk	exon	197		MIRc	MIRc_dup106	MIR	SINE	132	RP23-25K16.1	ENSMUST00000191140.1	intronic	proximal <=1000bp	Tss_prox_1kbp	-1.84375	-2.24549	11.8462	0.00105971	0.0150847	-0.193248	12.2077	46.807	9.39595e-06	5.20085e-05	0	0	TRUE	FALSE	TRUE	FALSE	FALSE	FALSE
chr1	23674117	23675018	902	*	mm10_rmsk	exon	3270		RMER1B	RMER1B_dup56	RMER1B	Other	-86735	B3gat2	ENSMUST00000144602.1	intergenic	intergenic	intergenic	-1.22847	1.15549	25.8214	3.93989e-06	0.000191432	0.0433976	12.0162	1.19464	0.29339	0.345947	0	0	TRUE	TRUE	TRUE	FALSE	FALSE	FALSE
chr1	23688184	23688572	389	*	mm10_rmsk	exon	1028		MER45B	MER45B_dup7	hAT-Tip100	DNA	-73181	B3gat2	ENSMUST00000144602.1	intergenic	intergenic	intergenic	2.11125	-2.40025	13.3633	0.000542562	0.00902916	0.148748	6.98244	23.0682	0.000304976	0.000826315	1.67236e-54	3.08283e-54	FALSE	FALSE	FALSE	FALSE	FALSE	FALSE
chr1	23732395	23732921	527	*	mm10_rmsk	exon	2312		MLTR18_MM	MLTR18_MM_dup2	ERVK	LTR	-28832	B3gat2	ENSMUST00000144602.1	intergenic	intergenic	intergenic	1.55156	-2.0465	10.1586	0.00228388	0.0267536	0.202587	6.92951	39.7599	2.21955e-05	0.000100148	1.85543e-60	3.54761e-60	FALSE	FALSE	FALSE	FALSE	FALSE	FALSE
chr1	23758690	23758776	87	*	mm10_rmsk	exon	337		MIR	MIR_dup198	MIR	SINE	-2977	B3gat2	ENSMUST00000144602.1	intergenic	intergenic	intergenic	-1.45243	-1.2496	17.5813	9.22498e-05	0.0022473	-0.0763741	12.8857	8.72251	0.0107557	0.0189413	0	0	TRUE	FALSE	TRUE	FALSE	FALSE	FALSE
chr1	23758880	23759130	251	*	mm10_rmsk	exon	520		ORR1D2	ORR1D2_dup100	ERVL-MaLR	LTR	-2623	B3gat2	ENSMUST00000144602.1	intergenic	intergenic	intergenic	-1.5428	0.408429	33.8428	2.49054e-07	2.4975e-05	-0.192417	11.9933	47.1146	9.07148e-06	5.15279e-05	0	0	TRUE	TRUE	TRUE	FALSE	FALSE	FALSE
chr1	23761124	23761314	191	*	mm10_rmsk	exon	190		MIRc	MIRc_dup109	MIR	SINE	-439	B3gat2	ENSMUST00000144602.1	intergenic	proximal <=1000bp	Tss_prox_1kbp	-1.30996	-0.496795	21.3126	2.1143e-05	0.000701847	-0.193248	12.2077	46.807	9.39595e-06	5.20085e-05	0	0	FALSE	FALSE	FALSE	FALSE	TRUE	TRUE
chr1	23785426	23786104	679	*	mm10_rmsk	exon	2932		IAPEy-int	IAPEy-int_dup7	ERVK	LTR	23415	B3gat2	ENSMUST00000140583.1	intronic	intronic	gene_body	-1.16863	-0.0302493	20.5503	2.83824e-05	0.000885444	0.367001	9.89237	43.781	1.34114e-05	6.66991e-05	9.54389e-178	2.95468e-177	TRUE	FALSE	TRUE	FALSE	FALSE	FALSE
chr1	23793002	23793122	121	*	mm10_rmsk	exon	482		MTEa	MTEa_dup137	ERVL-MaLR	LTR	30991	B3gat2	ENSMUST00000140583.1	intronic	intronic	gene_body	-1.62589	0.544918	40.4748	3.05664e-08	5.88878e-06	-0.2922	12.679	58.9166	2.66017e-06	2.14153e-05	0	0	TRUE	TRUE	TRUE	FALSE	FALSE	FALSE
chr1	23793149	23793252	104	*	mm10_rmsk	exon	314		MTEa	MTEa_dup138	ERVL-MaLR	LTR	31138	B3gat2	ENSMUST00000140583.1	intronic	intronic	gene_body	-1.63358	0.316792	39.4749	4.15383e-08	7.232e-06	-0.2922	12.679	58.9166	2.66017e-06	2.14153e-05	0	0	FALSE	FALSE	FALSE	FALSE	FALSE	FALSE
chr1	23816241	23817205	965	*	mm10_rmsk	exon	6622		L1_Mus2	L1_Mus2_dup317	L1	LINE	-30572	Smap1	ENSMUST00000136506.1	intronic	intronic	gene_body	1.39913	-1.92086	9.20403	0.00356889	0.0369464	0.484439	13.0175	105.113	8.99763e-08	3.05101e-06	0	0	FALSE	FALSE	FALSE	FALSE	FALSE	FALSE
chr1	23817206	23817797	592	*	mm10_rmsk	exon	4811		L1_Mus2	L1_Mus2_dup318	L1	LINE	-29980	Smap1	ENSMUST00000136506.1	intronic	intronic	gene_body	1.98763	-1.77418	19.3701	4.50664e-05	0.00127404	0.484439	13.0175	105.113	8.99763e-08	3.05101e-06	0	0	FALSE	FALSE	FALSE	FALSE	FALSE	FALSE
chr1	23828857	23828998	142	*	mm10_rmsk	exon	1065		B1_Mm	B1_Mm_dup300	Alu	SINE	-18779	Smap1	ENSMUST00000136506.1	intronic	intronic	gene_body	-1.66793	-1.06152	25.0515	5.2118e-06	0.000236996	-0.134862	12.9233	6.73414	0.0215837	0.0353101	0	0	FALSE	FALSE	FALSE	FALSE	FALSE	FALSE
chr1	23857810	23858410	601	*	mm10_rmsk	exon	1042		Lx8	Lx8_dup423	L1	LINE	10033	Smap1	ENSMUST00000136506.1	intronic	intronic	gene_body	1.09523	-1.50903	9.34781	0.00333486	0.0352018	0.121817	13.7403	15.9377	0.00141182	0.00306763	0	0	FALSE	FALSE	FALSE	FALSE	FALSE	FALSE
chr1	23884981	23885269	289	*	mm10_rmsk	exon	303		MLT2B3	MLT2B3_dup14	ERVL	LTR	-6725	Smap1	ENSMUST00000133398.1	intronic	intronic	gene_body	-1.27716	-0.464099	19.9856	3.53756e-05	0.00105222	0.139409	8.35325	13.1769	0.00285411	0.00573383	6.64808e-187	2.13418e-186	FALSE	FALSE	FALSE	FALSE	FALSE	TRUE
chr1	23885063	23885269	207	*	mm10_rmsk	exon	801		MTE2b	MTE2b_dup90	ERVL-MaLR	LTR	-6725	Smap1	ENSMUST00000133398.1	intronic	intronic	gene_body	-1.36609	-0.633605	21.4378	2.01504e-05	0.000675196	-0.265936	12.1834	46.9875	9.20397e-06	5.1755e-05	0	0	FALSE	FALSE	FALSE	FALSE	FALSE	TRUE
chr1	23915458	23915618	161	*	mm10_rmsk	exon	643		RSINE1	RSINE1_dup597	B4	SINE	5722	Smap1	ENSMUST00000149737.7	intronic	intronic	gene_body	-1.10798	-0.739324	14.1932	0.000379096	0.00683315	0.0578688	14.2698	3.88326	0.0694883	0.0999452	0	0	TRUE	FALSE	TRUE	FALSE	FALSE	FALSE
chr1	23934210	23934354	145	*	mm10_rmsk	exon	1328		B1_Mm	B1_Mm_dup302	Alu	SINE	11893	Smap1	ENSMUST00000027339.13	intergenic	intergenic	intergenic	-1.7113	-1.19522	23.5416	9.09671e-06	0.000364632	-0.134862	12.9233	6.73414	0.0215837	0.0353101	0	0	FALSE	FALSE	FALSE	FALSE	FALSE	FALSE
chr1	23934355	23934397	43	*	mm10_rmsk	exon	759		ORR1D1	ORR1D1_dup161	ERVL-MaLR	LTR	12038	Smap1	ENSMUST00000027339.13	intergenic	intergenic	intergenic	-1.96082	-1.48325	22.6716	1.26044e-05	0.000468774	0.0522614	12.1868	4.48196	0.0532154	0.0784558	0	0	FALSE	FALSE	FALSE	FALSE	FALSE	TRUE
chr1	23934509	23934707	199	*	mm10_rmsk	exon	298		L1ME2	L1ME2_dup13	L1	LINE	12192	Smap1	ENSMUST00000027339.13	intergenic	intergenic	intergenic	-1.439	-0.897037	20.078	3.41187e-05	0.00102275	0.143869	8.82327	14.0091	0.0022899	0.00467591	6.51471e-214	2.27211e-213	FALSE	FALSE	FALSE	FALSE	FALSE	FALSE
chr1	23934748	23934814	67	*	mm10_rmsk	exon	245		L1ME2	L1ME2_dup14	L1	LINE	12431	Smap1	ENSMUST00000027339.13	intergenic	intergenic	intergenic	-1.2822	-0.071921	23.3075	9.92753e-06	0.000389683	0.143869	8.82327	14.0091	0.0022899	0.00467591	6.51471e-214	2.27211e-213	TRUE	TRUE	TRUE	FALSE	FALSE	FALSE
chr1	23947361	23947604	244	*	mm10_rmsk	exon	889		B4	B4_dup328	B4	SINE	25044	Smap1	ENSMUST00000027339.13	intergenic	intergenic	intergenic	-1.58341	0.30258	35.7487	1.34166e-07	1.61699e-05	0.0559679	13.6316	3.88846	0.0693232	0.0998362	0	0	TRUE	FALSE	TRUE	FALSE	FALSE	TRUE
chr1	23953981	23954202	222	*	mm10_rmsk	exon	246		L2	L2_dup152	L2	LINE	31664	Smap1	ENSMUST00000027339.13	intergenic	intergenic	intergenic	-1.21309	0.0135194	22.5375	1.32586e-05	0.000487511	-0.0530077	12.0044	4.68269	0.0488031	0.0729114	0	0	TRUE	FALSE	TRUE	FALSE	FALSE	TRUE
chr1	23958152	23958640	489	*	mm10_rmsk	exon	1223		MTE-int	MTE-int_dup51	ERVL-MaLR	LTR	35835	Smap1	ENSMUST00000027339.13	intergenic	intergenic	intergenic	-1.72641	0.230775	41.7825	2.05651e-08	4.53196e-06	0.0385354	10.4156	2.99475	0.106163	0.144697	0	0	TRUE	FALSE	TRUE	FALSE	FALSE	FALSE
chr1	23958664	23959154	491	*	mm10_rmsk	exon	2007		Lx4B	Lx4B_dup42	L1	LINE	36347	Smap1	ENSMUST00000027339.13	intergenic	intergenic	intergenic	-1.8189	1.80778	54.3927	5.79784e-10	5.21085e-07	0.306357	11.1248	45.7945	1.05621e-05	5.62807e-05	0	0	TRUE	TRUE	TRUE	FALSE	FALSE	TRUE
chr1	23959233	23959296	64	*	mm10_rmsk	exon	238		ID4_	ID4__dup165	ID	SINE	36916	Smap1	ENSMUST00000027339.13	intergenic	intergenic	intergenic	-1.56311	0.490685	41.8845	1.99436e-08	4.4489e-06	-0.141335	12.0045	20.1414	0.000548502	0.00134679	0	0	FALSE	FALSE	FALSE	FALSE	FALSE	TRUE
chr1	23959774	23960172	399	*	mm10_rmsk	exon	3193		MTA_Mm	MTA_Mm_dup212	ERVL-MaLR	LTR	37457	Smap1	ENSMUST00000027339.13	intergenic	intergenic	intergenic	-1.29435	-0.549057	17.7936	8.46455e-05	0.00210019	0.182177	12.2533	25.2866	0.000201809	0.000582022	0	0	FALSE	FALSE	FALSE	FALSE	FALSE	FALSE
chr1	23967743	23969310	1568	*	mm10_rmsk	exon	3994		RMER1A	RMER1A_dup26	RMER1A	Other	-36195	RP24-287C19.1	ENSMUST00000192339.1	intergenic	intergenic	intergenic	-1.20235	2.1906	26.5492	3.03192e-06	0.00015667	-0.0317533	11.4648	0.511812	0.486465	0.538965	0	0	TRUE	TRUE	TRUE	FALSE	FALSE	TRUE
chr1	23994856	23995026	171	*	mm10_rmsk	exon	365		RSINE1	RSINE1_dup606	B4	SINE	-10479	RP24-287C19.1	ENSMUST00000192339.1	intergenic	intergenic	intergenic	1.44985	-2.11002	8.34689	0.0053724	0.0492799	0.0578688	14.2698	3.88326	0.0694883	0.0999452	0	0	FALSE	FALSE	FALSE	FALSE	FALSE	FALSE
chr1	23999194	23999345	152	*	mm10_rmsk	exon	335		RSINE1	RSINE1_dup607	B4	SINE	-6160	RP24-287C19.1	ENSMUST00000192339.1	intronic	intronic	gene_body	1.62654	-2.2218	8.8232	0.00427584	0.0419902	0.0578688	14.2698	3.88326	0.0694883	0.0999452	0	0	FALSE	FALSE	FALSE	FALSE	FALSE	FALSE
chr1	24005236	24005316	81	*	mm10_rmsk	exon	395		B1F2	B1F2_dup89	Alu	SINE	-189	RP24-287C19.1	ENSMUST00000192339.1	intronic	proximal <=1000bp	Tss_prox_1kbp	-1.32517	-0.0520352	21.1362	2.26274e-05	0.000740893	-0.209237	11.7791	21.8106	0.000389999	0.00100381	0	0	FALSE	FALSE	FALSE	TRUE	FALSE	TRUE
chr1	24005317	24005332	16	*	mm10_rmsk	exon	343		MT2B2	MT2B2_dup20	ERVL	LTR	-173	RP24-287C19.1	ENSMUST00000192339.1	intronic	proximal <=1000bp	Tss_prox_1kbp	-1.56589	-0.221885	31.5912	5.26416e-07	4.27419e-05	0.121731	9.34329	20.5697	0.000501704	0.00124757	0	0	FALSE	FALSE	FALSE	TRUE	FALSE	TRUE
chr1	24042661	24042932	272	*	mm10_rmsk	exon	392		L1M5	L1M5_dup110	L1	LINE	13575	Fam135a	ENSMUST00000186331.1	intronic	intronic	gene_body	-1.82444	-2.29554	9.05414	0.00383129	0.0388622	0.0996219	11.1382	5.97563	0.0287992	0.0456463	0	0	TRUE	FALSE	TRUE	FALSE	FALSE	FALSE
chr1	24082645	24082775	131	*	mm10_rmsk	exon	295		B1F	B1F_dup270	Alu	SINE	-3751	Fam135a	ENSMUST00000188712.6	intronic	intronic	gene_body	-1.82454	-2.32548	10.7334	0.00175315	0.0219771	-0.210784	13.2074	26.2569	0.000169765	0.00050658	0	0	FALSE	FALSE	FALSE	FALSE	FALSE	FALSE
chr1	24100932	24101469	538	*	mm10_rmsk	exon	2438		Lx4A	Lx4A_dup78	L1	LINE	307	RP23-255J24.2	ENSMUST00000192408.1	exonic	proximal <=1000bp	Tss_prox_1kbp	-1.14273	1.93475	23.9371	7.8535e-06	0.000325383	0.386963	11.9984	67.5375	1.22707e-06	1.22598e-05	0	0	TRUE	TRUE	TRUE	TRUE	FALSE	TRUE
chr1	24112364	24112784	421	*	mm10_rmsk	exon	1904		RMER17C2	RMER17C2_dup24	ERVK	LTR	11739	RP23-255J24.2	ENSMUST00000192408.1	intergenic	intergenic	intergenic	-1.47977	-0.885426	18.1915	7.20922e-05	0.00185042	-0.14218	9.92057	6.57569	0.0228977	0.0371879	0	0	TRUE	FALSE	TRUE	FALSE	FALSE	FALSE
chr1	24132411	24132825	415	*	mm10_rmsk	exon	2518		BGLII_Mus	BGLII_Mus_dup8	ERVK	LTR	7136	RP23-255J24.1	ENSMUST00000180661.1	intergenic	intergenic	intergenic	-1.13621	-1.6257	8.58119	0.0048002	0.0455511	-0.0922216	7.37727	6.31632	0.0252559	0.0404891	7.51783e-102	1.78095e-101	FALSE	FALSE	FALSE	FALSE	TRUE	FALSE
chr1	24132841	24133067	227	*	mm10_rmsk	exon	365		RLTR25B	RLTR25B_dup39	ERVK	LTR	7566	RP23-255J24.1	ENSMUST00000180661.1	intergenic	intergenic	intergenic	-1.37521	-1.19054	15.7496	0.000196146	0.00407048	0.118739	9.31989	21.6616	0.000401777	0.00102646	0	0	FALSE	FALSE	FALSE	FALSE	FALSE	FALSE
chr1	24133088	24133325	238	*	mm10_rmsk	exon	693		L1MB5	L1MB5_dup26	L1	LINE	7813	RP23-255J24.1	ENSMUST00000180661.1	intergenic	intergenic	intergenic	-1.22614	-1.61779	9.28511	0.00343487	0.0359457	-0.0316895	9.69183	1.31638	0.271038	0.323339	0	0	FALSE	FALSE	FALSE	FALSE	FALSE	FALSE
chr1	24176294	24176457	164	*	mm10_rmsk	exon	377		B4A	B4A_dup564	B4	SINE	-1153	Col9a1	ENSMUST00000054588.14	intergenic	intergenic	intergenic	-1.72087	0.613383	49.6695	2.09848e-09	1.10096e-06	0.0753296	14.4644	7.74941	0.0149756	0.0252756	0	0	TRUE	TRUE	TRUE	FALSE	FALSE	TRUE
chr1	24177172	24177315	144	*	mm10_rmsk	exon	341		MIRb	MIRb_dup169	MIR	SINE	-295	Col9a1	ENSMUST00000054588.14	intergenic	proximal <=1000bp	Tss_prox_1kbp	-1.86016	-1.58845	18.9342	5.35677e-05	0.00146146	-0.165951	13.1579	40.2205	2.09103e-05	9.5896e-05	0	0	FALSE	FALSE	FALSE	FALSE	TRUE	FALSE
chr1	24246328	24246558	231	*	mm10_rmsk	exon	359		MIRb	MIRb_dup170	MIR	SINE	16811	Col9a1	ENSMUST00000147902.1	intronic	intronic	gene_body	-1.17963	0.00653237	21.7838	1.76515e-05	0.000609012	-0.165951	13.1579	40.2205	2.09103e-05	9.5896e-05	0	0	FALSE	FALSE	FALSE	FALSE	FALSE	TRUE
chr1	24279019	24279228	210	*	mm10_rmsk	exon	782		ID_B1	ID_B1_dup544	B4	SINE	49502	Col9a1	ENSMUST00000147902.1	intronic	intronic	gene_body	-2.34857	-2.75936	8.57287	0.00481938	0.0456827	-0.175808	14.6041	23.3246	0.000290382	0.000788684	0	0	FALSE	FALSE	FALSE	FALSE	FALSE	FALSE
chr1	24290145	24290524	380	*	mm10_rmsk	exon	1125		MTD	MTD_dup395	ERVL-MaLR	LTR	60628	Col9a1	ENSMUST00000147902.1	intronic	intronic	gene_body	-1.3773	0.133193	30.1554	8.5729e-07	6.11642e-05	-0.128328	13.8494	24.9898	0.000212962	0.000611037	0	0	TRUE	TRUE	TRUE	FALSE	FALSE	TRUE
chr1	24300784	24300945	162	*	mm10_rmsk	exon	596		B3A	B3A_dup568	B2	SINE	71267	Col9a1	ENSMUST00000147902.1	intronic	intronic	gene_body	-1.54714	-1.29222	17.2471	0.000105692	0.00250142	-0.0693289	14.2699	6.57714	0.0228853	0.0371879	0	0	TRUE	TRUE	TRUE	FALSE	FALSE	FALSE
chr1	24311498	24311941	444	*	mm10_rmsk	exon	1376		RLTR11A2	RLTR11A2_dup31	ERVK	LTR	81981	Col9a1	ENSMUST00000147902.1	intronic	intronic	gene_body	-1.6049	0.919543	38.2471	6.08079e-08	9.35543e-06	0.000197387	9.92986	5.22435e-05	0.994338	0.994338	0	0	TRUE	FALSE	TRUE	FALSE	FALSE	TRUE
chr1	24329729	24329861	133	*	mm10_rmsk	exon	229		B1F	B1F_dup273	Alu	SINE	100212	Col9a1	ENSMUST00000147902.1	intronic	intronic	gene_body	-1.49369	-1.67958	12.8462	0.000680224	0.0107524	-0.210784	13.2074	26.2569	0.000169765	0.00050658	0	0	FALSE	FALSE	FALSE	FALSE	FALSE	FALSE
chr1	24330007	24330192	186	*	mm10_rmsk	exon	1020		B3	B3_dup870	B2	SINE	100490	Col9a1	ENSMUST00000147902.1	intronic	intronic	gene_body	-1.36859	-0.949817	17.53	9.41942e-05	0.00228386	-0.0408682	15.0047	1.97967	0.18188	0.229711	0	0	TRUE	FALSE	TRUE	FALSE	FALSE	TRUE
chr1	24331077	24331233	157	*	mm10_rmsk	exon	501		B4A	B4A_dup565	B4	SINE	101560	Col9a1	ENSMUST00000147902.1	intronic	intronic	gene_body	-1.20563	0.360645	24.7469	5.82632e-06	0.000257895	0.0753296	14.4644	7.74941	0.0149756	0.0252756	0	0	TRUE	TRUE	TRUE	FALSE	FALSE	TRUE
chr1	24337269	24337620	352	*	mm10_rmsk	exon	1636		Lx5b	Lx5b_dup56	L1	LINE	107752	Col9a1	ENSMUST00000147902.1	intronic	intronic	gene_body	-1.48385	1.05652	37.4893	7.71275e-08	1.10024e-05	0.335052	11.4671	61.8767	2.01907e-06	1.73251e-05	0	0	TRUE	TRUE	TRUE	FALSE	FALSE	TRUE
chr1	24345216	24347861	2646	*	mm10_rmsk	exon	13775		L1VL2	L1VL2_dup73	L1	LINE	-104884	Col19a1	ENSMUST00000144297.1	intronic	intronic	gene_body	1.03402	-1.25687	10.1136	0.00233197	0.0271653	0.412803	11.1411	86.8287	2.83295e-07	5.12027e-06	0	0	FALSE	FALSE	FALSE	FALSE	FALSE	FALSE
chr1	24361791	24361913	123	*	mm10_rmsk	exon	490		RMER20C_Mm	RMER20C_Mm_dup9	ERVK	LTR	-90832	Col19a1	ENSMUST00000144297.1	intronic	intronic	gene_body	-1.71686	-0.763668	31.962	4.64742e-07	3.9054e-05	-0.263126	9.68951	37.0604	3.18322e-05	0.000130957	0	0	FALSE	FALSE	FALSE	FALSE	FALSE	TRUE
chr1	24368659	24368751	93	*	mm10_rmsk	exon	191		MIRc	MIRc_dup112	MIR	SINE	-83994	Col19a1	ENSMUST00000144297.1	intronic	intronic	gene_body	-1.02781	-0.841959	11.3726	0.00131117	0.0176917	-0.193248	12.2077	46.807	9.39595e-06	5.20085e-05	0	0	TRUE	TRUE	TRUE	FALSE	FALSE	FALSE
chr1	24375886	24375982	97	*	mm10_rmsk	exon	269		RSINE1	RSINE1_dup615	B4	SINE	-76763	Col19a1	ENSMUST00000144297.1	intronic	intronic	gene_body	-1.27372	-0.895041	14.6071	0.000317626	0.00594824	0.0578688	14.2698	3.88326	0.0694883	0.0999452	0	0	FALSE	FALSE	FALSE	FALSE	FALSE	FALSE
chr1	24376054	24376197	144	*	mm10_rmsk	exon	862		B1_Mur3	B1_Mur3_dup130	Alu	SINE	-76548	Col19a1	ENSMUST00000144297.1	intronic	intronic	gene_body	-2.1457	1.17054	69.2208	1.42197e-11	7.56642e-08	-0.199309	12.3985	15.6938	0.00149799	0.00323602	0	0	TRUE	FALSE	TRUE	FALSE	FALSE	FALSE
chr1	24376359	24376697	339	*	mm10_rmsk	exon	2024		ORR1B1	ORR1B1_dup125	ERVL-MaLR	LTR	-76048	Col19a1	ENSMUST00000144297.1	intronic	intronic	gene_body	-1.50417	3.09985	33.1683	3.11011e-07	2.9257e-05	-0.0271086	12.3851	0.725931	0.408968	0.463194	0	0	TRUE	TRUE	TRUE	FALSE	FALSE	TRUE
chr1	24376881	24377066	186	*	mm10_rmsk	exon	608		Lx8	Lx8_dup428	L1	LINE	-75679	Col19a1	ENSMUST00000144297.1	intronic	intronic	gene_body	-1.33877	-0.00471969	25.0806	5.15678e-06	0.000235067	0.121817	13.7403	15.9377	0.00141182	0.00306763	0	0	TRUE	FALSE	TRUE	FALSE	FALSE	FALSE
chr1	24381455	24381812	358	*	mm10_rmsk	exon	500		L1MB2	L1MB2_dup20	L1	LINE	-70933	Col19a1	ENSMUST00000144297.1	intronic	intronic	gene_body	2.21717	-2.60965	10.9438	0.00159261	0.0204559	-0.0617482	9.38574	2.77714	0.118487	0.159168	0	0	FALSE	FALSE	FALSE	FALSE	FALSE	FALSE
chr1	24434993	24435005	13	*	mm10_rmsk	exon	344		ID_B1	ID_B1_dup546	B4	SINE	-17740	Col19a1	ENSMUST00000144297.1	intronic	intronic	gene_body	-1.81324	-2.33662	10.818	0.00168665	0.0213488	-0.175808	14.6041	23.3246	0.000290382	0.000788684	0	0	FALSE	FALSE	FALSE	FALSE	FALSE	FALSE
chr1	24452530	24452671	142	*	mm10_rmsk	exon	630		B1F2	B1F2_dup92	Alu	SINE	-74	Col19a1	ENSMUST00000144297.1	exonic	proximal <=1000bp	Tss_prox_1kbp	-1.35005	-0.284571	26.502	3.08369e-06	0.000158579	-0.209237	11.7791	21.8106	0.000389999	0.00100381	0	0	TRUE	FALSE	FALSE	FALSE	FALSE	FALSE
chr1	24490107	24491620	1514	*	mm10_rmsk	exon	9697		Lx3_Mus	Lx3_Mus_dup99	L1	LINE	37362	Col19a1	ENSMUST00000144297.1	intronic	intronic	gene_body	1.04596	-1.44546	8.55297	0.00486559	0.0459914	0.490828	12.3525	77.1477	5.68276e-07	7.57815e-06	0	0	FALSE	FALSE	FALSE	FALSE	FALSE	FALSE
chr1	24551560	24551650	91	*	mm10_rmsk	exon	246		LTR88a	LTR88a_dup1	Gypsy	LTR	2583	Gm26418	ENSMUST00000104275.1	intronic	intronic	gene_body	-1.65048	-2.12193	10.6218	0.00184506	0.0228315	-0.701654	5.06183	41.0988	2.24696e-05	0.000100574	1.85899e-28	2.77866e-28	FALSE	FALSE	FALSE	FALSE	FALSE	FALSE
chr1	24551710	24551802	93	*	mm10_rmsk	exon	263		MTD	MTD_dup402	ERVL-MaLR	LTR	2733	Gm26418	ENSMUST00000104275.1	intronic	intronic	gene_body	-1.61696	-2.2075	9.55979	0.00301868	0.0327853	-0.128328	13.8494	24.9898	0.000212962	0.000611037	0	0	FALSE	FALSE	FALSE	FALSE	FALSE	FALSE
chr1	24595480	24596034	555	*	mm10_rmsk	exon	2998		Lx2B	Lx2B_dup45	L1	LINE	57	Tubb4b-ps2	ENSMUST00000187481.1	intergenic	proximal <=1000bp	Tss_prox_1kbp	-1.62321	0.780756	41.609	2.16685e-08	4.70092e-06	0.21701	11.4789	26.956	0.000150288	0.000460745	0	0	TRUE	TRUE	TRUE	FALSE	TRUE	FALSE
chr1	24601195	24601559	365	*	mm10_rmsk	exon	333		L2a	L2a_dup140	L2	LINE	5772	Tubb4b-ps2	ENSMUST00000187481.1	intergenic	intergenic	intergenic	-1.80899	-0.322511	43.3904	1.27254e-08	3.32994e-06	-0.0983674	12.4255	17.964	0.000880133	0.00202232	0	0	FALSE	FALSE	FALSE	FALSE	FALSE	TRUE
chr1	24603208	24603671	464	*	mm10_rmsk	exon	2347		Lx3C	Lx3C_dup31	L1	LINE	7785	Tubb4b-ps2	ENSMUST00000187481.1	intergenic	intergenic	intergenic	-1.01145	-0.75343	10.9387	0.00159636	0.0204921	0.410616	11.371	55.7072	3.635e-06	2.65854e-05	0	0	FALSE	FALSE	FALSE	FALSE	FALSE	FALSE
chr1	24619640	24619913	274	*	mm10_rmsk	exon	2648		Lx9	Lx9_dup457	L1	LINE	3443	RP23-8J15.1	ENSMUST00000187117.1	intergenic	intergenic	intergenic	-1.57218	-0.627857	26.3117	3.30159e-06	0.000167302	0.366266	13.1834	126.776	2.85574e-08	2.45813e-06	0	0	FALSE	FALSE	FALSE	FALSE	FALSE	FALSE
chr1	24619914	24620836	923	*	mm10_rmsk	exon	4158		RMER13B	RMER13B_dup27	ERVK	LTR	3717	RP23-8J15.1	ENSMUST00000187117.1	intergenic	intergenic	intergenic	-1.38194	1.71087	36.1516	1.17915e-07	1.47785e-05	-0.464354	11.2305	71.0692	9.15296e-07	1.03456e-05	0	0	FALSE	FALSE	FALSE	FALSE	FALSE	TRUE
chr1	24633660	24633789	130	*	mm10_rmsk	exon	279		RSINE1	RSINE1_dup622	B4	SINE	17463	RP23-8J15.1	ENSMUST00000187117.1	intergenic	intergenic	intergenic	-1.51016	0.916683	40.9531	2.64255e-08	5.3677e-06	0.0578688	14.2698	3.88326	0.0694883	0.0999452	0	0	TRUE	FALSE	TRUE	FALSE	FALSE	FALSE
chr1	24647215	24647789	575	*	mm10_rmsk	exon	3891		Lx7	Lx7_dup423	L1	LINE	-30841	Lmbrd1	ENSMUST00000191471.6	intergenic	intergenic	intergenic	-1.08523	-1.12326	9.21518	0.00355015	0.036812	0.295529	13.1367	105.492	8.80305e-08	3.05101e-06	0	0	FALSE	FALSE	FALSE	FALSE	FALSE	FALSE
chr1	24647815	24648275	461	*	mm10_rmsk	exon	749		RMER13A2	RMER13A2_dup14	ERVK	LTR	-30355	Lmbrd1	ENSMUST00000191471.6	intergenic	intergenic	intergenic	-1.41265	1.29492	36.2548	1.14092e-07	1.44389e-05	-0.29627	10.0049	55.3401	3.7707e-06	2.7222e-05	0	0	TRUE	TRUE	TRUE	FALSE	FALSE	FALSE
chr1	24648295	24648365	71	*	mm10_rmsk	exon	263		RMER13A2	RMER13A2_dup15	ERVK	LTR	-30265	Lmbrd1	ENSMUST00000191471.6	intergenic	intergenic	intergenic	-1.38738	0.509466	31.7482	4.99336e-07	4.11313e-05	-0.29627	10.0049	55.3401	3.7707e-06	2.7222e-05	0	0	TRUE	TRUE	TRUE	FALSE	FALSE	TRUE
chr1	24648501	24648787	287	*	mm10_rmsk	exon	815		Lx7	Lx7_dup424	L1	LINE	-29843	Lmbrd1	ENSMUST00000191471.6	intergenic	intergenic	intergenic	-1.52938	0.305524	36.5039	1.05378e-07	1.36763e-05	0.295529	13.1367	105.492	8.80305e-08	3.05101e-06	0	0	FALSE	FALSE	FALSE	FALSE	FALSE	TRUE
chr1	24648916	24649314	399	*	mm10_rmsk	exon	2229		RLTR11C_MM	RLTR11C_MM_dup6	ERVK	LTR	-29316	Lmbrd1	ENSMUST00000191471.6	intergenic	intergenic	intergenic	-1.05124	-1.27099	9.16987	0.00362699	0.0373749	0.00136729	7.96819	0.00131448	0.971606	0.975966	3.64203e-144	1.02122e-143	FALSE	FALSE	FALSE	FALSE	FALSE	FALSE
chr1	24676398	24676549	152	*	mm10_rmsk	exon	640		RMER20B	RMER20B_dup11	ERVK	LTR	-2081	Lmbrd1	ENSMUST00000191471.6	intergenic	intergenic	intergenic	-1.38079	-1.07947	14.712	0.000303755	0.0057408	0.0263686	9.29977	0.497334	0.492584	0.544666	0	0	FALSE	FALSE	FALSE	FALSE	FALSE	FALSE
chr1	24701220	24701976	757	*	mm10_rmsk	exon	4595		RMER17D	RMER17D_dup11	ERVK	LTR	22294	Lmbrd1	ENSMUST00000095062.9	intronic	intronic	gene_body	1.7357	-1.07869	24.6651	6.004e-06	0.000263968	0.371129	8.70196	15.6308	0.00205738	0.00424761	1.91848e-261	7.74244e-261	FALSE	FALSE	FALSE	FALSE	FALSE	FALSE
chr1	24740791	24741278	488	*	mm10_rmsk	exon	1227		RLTR11A2	RLTR11A2_dup33	ERVK	LTR	-3595	Lmbrd1	ENSMUST00000190195.1	intronic	intronic	gene_body	-1.04645	-1.04531	9.41199	0.00323563	0.0344561	0.000197387	9.92986	5.22435e-05	0.994338	0.994338	0	0	TRUE	FALSE	TRUE	FALSE	FALSE	FALSE
chr1	24784314	24784538	225	*	mm10_rmsk	exon	454		L1M2	L1M2_dup184	L1	LINE	39441	Lmbrd1	ENSMUST00000190195.1	intergenic	intergenic	intergenic	-1.4012	-1.83092	10.1811	0.00226029	0.0265455	0.243374	11.3215	50.1073	6.50403e-06	4.08877e-05	0	0	FALSE	FALSE	FALSE	FALSE	FALSE	FALSE
chr1	24792925	24793246	322	*	mm10_rmsk	exon	1968		ORR1A3	ORR1A3_dup46	ERVL-MaLR	LTR	48052	Lmbrd1	ENSMUST00000190195.1	intergenic	intergenic	intergenic	-1.21652	-0.774895	16.0713	0.000171536	0.00366257	0.113205	10.224	11.7022	0.00429877	0.00826517	0	0	TRUE	FALSE	TRUE	FALSE	FALSE	FALSE
chr1	24793247	24793311	65	*	mm10_rmsk	exon	1598		RLTR40	RLTR40_dup19	ERVK	LTR	48374	Lmbrd1	ENSMUST00000190195.1	intergenic	intergenic	intergenic	-1.69534	-1.56636	16.9151	0.000121068	0.00278342	0.140976	9.27108	26.8263	0.000153697	0.000467327	1.18449e-282	5.12826e-282	FALSE	FALSE	FALSE	FALSE	FALSE	FALSE
chr1	24793333	24793413	81	*	mm10_rmsk	exon	277		RMER20B	RMER20B_dup13	ERVK	LTR	48460	Lmbrd1	ENSMUST00000190195.1	intergenic	intergenic	intergenic	-1.18582	-0.841539	15.99	0.000177433	0.00376163	0.0263686	9.29977	0.497334	0.492584	0.544666	0	0	TRUE	FALSE	FALSE	FALSE	FALSE	TRUE
chr1	24793770	24793902	133	*	mm10_rmsk	exon	291		RLTR40	RLTR40_dup20	ERVK	LTR	48897	Lmbrd1	ENSMUST00000190195.1	intergenic	intergenic	intergenic	-1.44989	-0.502641	25.9992	3.69485e-06	0.000182057	0.140976	9.27108	26.8263	0.000153697	0.000467327	1.18449e-282	5.12826e-282	FALSE	FALSE	FALSE	FALSE	FALSE	FALSE
chr1	24793970	24794304	335	*	mm10_rmsk	exon	742		MTE2b	MTE2b_dup95	ERVL-MaLR	LTR	49097	Lmbrd1	ENSMUST00000190195.1	intergenic	intergenic	intergenic	-1.58789	-0.178785	35.0168	1.69876e-07	1.9132e-05	-0.265936	12.1834	46.9875	9.20397e-06	5.1755e-05	0	0	FALSE	FALSE	FALSE	FALSE	FALSE	FALSE
chr1	24801719	24804003	2285	*	mm10_rmsk	exon	10867		L1Md_F	L1Md_F_dup53	L1	LINE	56846	Lmbrd1	ENSMUST00000190195.1	intergenic	intergenic	intergenic	1.16356	-1.36632	10.6607	0.0018125	0.0225292	0.68782	11.2456	113.731	7.70863e-08	3.05101e-06	0	0	FALSE	FALSE	FALSE	FALSE	FALSE	FALSE
chr1	24855187	24857750	2564	*	mm10_rmsk	exon	12894		L1_Mus2	L1_Mus2_dup323	L1	LINE	-53909	RP23-109H7.1	ENSMUST00000187022.1	intergenic	intergenic	intergenic	1.06694	-0.960297	11.8639	0.00105134	0.0149959	0.484439	13.0175	105.113	8.99763e-08	3.05101e-06	0	0	FALSE	FALSE	FALSE	FALSE	FALSE	FALSE
chr1	24858186	24859730	1545	*	mm10_rmsk	exon	7284		L1_Mus2	L1_Mus2_dup325	L1	LINE	-51929	RP23-109H7.1	ENSMUST00000187022.1	intergenic	intergenic	intergenic	1.26515	-1.36934	12.1759	0.000914756	0.0134847	0.484439	13.0175	105.113	8.99763e-08	3.05101e-06	0	0	FALSE	FALSE	FALSE	TRUE	FALSE	FALSE
chr1	24921383	24922967	1585	*	mm10_rmsk	exon	7303		L1_Mus1	L1_Mus1_dup430	L1	LINE	9724	RP23-109H7.1	ENSMUST00000187022.1	intergenic	intergenic	intergenic	1.13654	-1.47982	9.71605	0.00280579	0.0310782	0.568501	13.4728	115.916	4.95501e-08	3.05101e-06	0	0	FALSE	FALSE	FALSE	FALSE	FALSE	FALSE
chr1	24925805	24926252	448	*	mm10_rmsk	exon	1951		Lx9	Lx9_dup464	L1	LINE	14146	RP23-109H7.1	ENSMUST00000187022.1	intergenic	intergenic	intergenic	-1.3355	-1.4251	12.9244	0.000657267	0.0104763	0.366266	13.1834	126.776	2.85574e-08	2.45813e-06	0	0	FALSE	FALSE	FALSE	FALSE	FALSE	FALSE
chr1	24938895	24939305	411	*	mm10_rmsk	exon	2007		RMER17C	RMER17C_dup73	ERVK	LTR	-25671	RP24-178K6.1	ENSMUST00000186563.1	intergenic	intergenic	intergenic	-1.06944	0.803414	19.9438	3.59592e-05	0.00106556	-0.174785	11.5718	3.94549	0.0712389	0.1022	0	0	TRUE	TRUE	TRUE	FALSE	FALSE	FALSE
chr1	24949176	24949922	747	*	mm10_rmsk	exon	2044		Lx9	Lx9_dup467	L1	LINE	-15054	RP24-178K6.1	ENSMUST00000186563.1	intergenic	intergenic	intergenic	2.23773	-2.36037	15.1929	0.000247796	0.0048961	0.366266	13.1834	126.776	2.85574e-08	2.45813e-06	0	0	FALSE	FALSE	FALSE	FALSE	FALSE	FALSE
chr1	24989106	24989638	533	*	mm10_rmsk	exon	1848		MT2B1	MT2B1_dup61	ERVL	LTR	-22303	RP24-178K6.2	ENSMUST00000188406.1	intergenic	intergenic	intergenic	1.47122	-2.09831	9.02603	0.00388272	0.0392358	0.312012	10.3235	94.5783	1.70124e-07	3.88507e-06	0	0	FALSE	FALSE	FALSE	FALSE	FALSE	FALSE
chr1	25011012	25011128	117	*	mm10_rmsk	exon	737		Lx8	Lx8_dup441	L1	LINE	-813	RP24-178K6.2	ENSMUST00000188406.1	intergenic	proximal <=1000bp	Tss_prox_1kbp	-1.29156	-0.794202	16.57	0.000139533	0.00311306	0.121817	13.7403	15.9377	0.00141182	0.00306763	0	0	TRUE	TRUE	TRUE	FALSE	FALSE	FALSE
chr1	25020237	25021074	838	*	mm10_rmsk	exon	6483		RLTR13B2	RLTR13B2_dup7	ERVK	LTR	-6158	RP24-178K6.3	ENSMUST00000185379.1	intergenic	intergenic	intergenic	1.41096	-1.75019	12.3435	0.000849177	0.0127367	-0.0200359	7.6628	0.16801	0.688274	0.720466	3.29158e-93	7.45387e-93	FALSE	FALSE	FALSE	FALSE	FALSE	FALSE
chr1	25024137	25024523	387	*	mm10_rmsk	exon	1961		MTC	MTC_dup230	ERVL-MaLR	LTR	-2709	RP24-178K6.3	ENSMUST00000185379.1	intergenic	intergenic	intergenic	1.8226	-2.30668	11.478	0.00125027	0.0170812	-0.0712501	12.9646	7.63021	0.0156148	0.0261341	0	0	FALSE	FALSE	FALSE	FALSE	FALSE	FALSE
chr1	25033120	25033500	381	*	mm10_rmsk	exon	2284		Lx2B	Lx2B_dup46	L1	LINE	5888	RP24-178K6.3	ENSMUST00000185379.1	intergenic	intergenic	intergenic	-1.92936	1.5527	60.7395	1.11968e-10	2.20015e-07	0.21701	11.4789	26.956	0.000150288	0.000460745	0	0	TRUE	TRUE	TRUE	FALSE	FALSE	FALSE
chr1	25053219	25053367	149	*	mm10_rmsk	exon	249		Charlie1a	Charlie1a_dup20	hAT-Charlie	DNA	25987	RP24-178K6.3	ENSMUST00000185379.1	intergenic	intergenic	intergenic	-1.77421	-1.35905	24.1059	7.37763e-06	0.000309672	0.0578911	8.97492	2.17869	0.162723	0.209296	8.39713e-259	3.35292e-258	FALSE	FALSE	TRUE	FALSE	FALSE	FALSE
chr1	25053431	25053552	122	*	mm10_rmsk	exon	281		PB1D10	PB1D10_dup392	Alu	SINE	26199	RP24-178K6.3	ENSMUST00000185379.1	intergenic	intergenic	intergenic	-1.84932	-0.315952	41.4085	2.30209e-08	4.89331e-06	-0.196601	13.5951	25.3633	0.00019904	0.000578507	0	0	TRUE	TRUE	TRUE	FALSE	FALSE	FALSE
chr1	25066750	25066886	137	*	mm10_rmsk	exon	963		L1_Mus1	L1_Mus1_dup434	L1	LINE	39518	RP24-178K6.3	ENSMUST00000185379.1	intergenic	intergenic	intergenic	-1.70764	-0.850135	26.3096	3.3041e-06	0.000167381	0.568501	13.4728	115.916	4.95501e-08	3.05101e-06	0	0	TRUE	FALSE	TRUE	FALSE	FALSE	FALSE
chr1	25107919	25107971	53	*	mm10_rmsk	exon	284		UCON25	UCON25_dup1	UCON25	Unknown	80687	RP24-178K6.3	ENSMUST00000185379.1	intronic	intronic	gene_body	-2.75526	-2.51634	16.2637	0.000158366	0.00343957	-0.761897	3.38666	22.1044	0.00039022	0.00100381	2.40834e-18	3.20167e-18	FALSE	FALSE	FALSE	FALSE	FALSE	FALSE
chr1	25117730	25117839	110	*	mm10_rmsk	exon	709		B1_Mus2	B1_Mus2_dup428	Alu	SINE	-86884	Adgrb3	ENSMUST00000154102.1	intronic	intronic	gene_body	-1.74174	-0.982292	25.9203	3.80148e-06	0.000186201	-0.176162	13.8323	10.0652	0.00699884	0.0128811	0	0	FALSE	FALSE	FALSE	FALSE	FALSE	FALSE
chr1	25178357	25178409	53	*	mm10_rmsk	exon	185		MIR3	MIR3_dup54	MIR	SINE	-26314	Adgrb3	ENSMUST00000154102.1	intronic	intronic	gene_body	-1.44751	-1.11085	17.6875	8.83618e-05	0.00217395	-0.29378	11.8255	83.1487	3.66046e-07	5.8515e-06	0	0	FALSE	FALSE	FALSE	FALSE	FALSE	FALSE
chr1	25209617	25210151	535	*	mm10_rmsk	exon	3535		LTRIS2	LTRIS2_dup26	ERV1	LTR	3921	Adgrb3	ENSMUST00000190202.1	intronic	intronic	gene_body	-1.24698	-1.48304	9.53524	0.00305363	0.0330623	0.0611396	9.12038	2.90325	0.111145	0.151119	1.88605e-297	8.52493e-297	TRUE	FALSE	TRUE	FALSE	FALSE	FALSE
chr1	25261482	25261772	291	*	mm10_rmsk	exon	464		Lx8	Lx8_dup444	L1	LINE	-16182	RP23-21P2.4	ENSMUST00000193138.1	intronic	intronic	gene_body	-1.23446	-1.60407	9.98175	0.0024791	0.0284096	0.121817	13.7403	15.9377	0.00141182	0.00306763	0	0	FALSE	FALSE	FALSE	FALSE	FALSE	FALSE
chr1	25270173	25270317	145	*	mm10_rmsk	exon	230		MIRb	MIRb_dup182	MIR	SINE	-7637	RP23-21P2.4	ENSMUST00000193138.1	intronic	intronic	gene_body	-1.09012	-1.00672	10.3065	0.002133	0.0254227	-0.165951	13.1579	40.2205	2.09103e-05	9.5896e-05	0	0	TRUE	TRUE	TRUE	FALSE	FALSE	FALSE
chr1	25409452	25409681	230	*	mm10_rmsk	exon	501		Lx9	Lx9_dup486	L1	LINE	-41390	Gm25294	ENSMUST00000122791.1	intronic	intronic	gene_body	2.8366	-2.81283	10.7658	0.0017274	0.0217323	0.366266	13.1834	126.776	2.85574e-08	2.45813e-06	0	0	FALSE	FALSE	FALSE	FALSE	FALSE	FALSE
chr1	25418784	25418916	133	*	mm10_rmsk	exon	249		LTR90A	LTR90A_dup1	LTR	LTR	-32155	Gm25294	ENSMUST00000122791.1	intronic	intronic	gene_body	-1.91562	-2.58192	8.4075	0.00521783	0.0482881	0.0588592	4.00599	0.418273	0.528571	0.580443	3.52518e-17	4.59453e-17	FALSE	FALSE	FALSE	FALSE	FALSE	FALSE
chr1	25536877	25537069	193	*	mm10_rmsk	exon	275		L1MA4	L1MA4_dup78	L1	LINE	-74115	RP23-347F2.2	ENSMUST00000195543.1	intronic	intronic	gene_body	-1.60108	-1.44987	16.0413	0.000173691	0.00369908	0.349661	10.1406	73.2471	7.68617e-07	9.34872e-06	0	0	TRUE	FALSE	TRUE	FALSE	FALSE	FALSE
chr1	25584735	25584921	187	*	mm10_rmsk	exon	635		B3	B3_dup913	B2	SINE	-26263	RP23-347F2.2	ENSMUST00000195543.1	intronic	intronic	gene_body	2.11482	-2.53619	11.3893	0.00130133	0.017594	-0.0408682	15.0047	1.97967	0.18188	0.229711	0	0	FALSE	FALSE	FALSE	FALSE	TRUE	TRUE
chr1	25599867	25600229	363	*	mm10_rmsk	exon	554		ORR1E	ORR1E_dup176	ERVL-MaLR	LTR	-10955	RP23-347F2.2	ENSMUST00000195543.1	intronic	intronic	gene_body	-1.42978	-1.14003	15.2904	0.00023782	0.00473994	-0.325711	12.9387	82.3757	3.86776e-07	6.01114e-06	0	0	TRUE	FALSE	FALSE	FALSE	FALSE	FALSE
chr1	25602608	25602997	390	*	mm10_rmsk	exon	2709		L1_Mus2	L1_Mus2_dup333	L1	LINE	-8187	RP23-347F2.2	ENSMUST00000195543.1	intronic	intronic	gene_body	-1.0998	-0.368699	15.8031	0.000191812	0.00400229	0.484439	13.0175	105.113	8.99763e-08	3.05101e-06	0	0	TRUE	TRUE	TRUE	FALSE	FALSE	FALSE
chr1	25603024	25603186	163	*	mm10_rmsk	exon	959		L1Md_A	L1Md_A_dup209	L1	LINE	-7998	RP23-347F2.2	ENSMUST00000195543.1	intronic	intronic	gene_body	-1.31824	-0.318859	22.3501	1.42322e-05	0.000515309	0.610953	13.853	112.613	5.9139e-08	3.05101e-06	0	0	TRUE	TRUE	TRUE	FALSE	FALSE	FALSE
chr1	25837537	25839173	1637	*	mm10_rmsk	exon	7826		Lx3B	Lx3B_dup55	L1	LINE	6880	RP23-184I13.1	ENSMUST00000194343.1	intergenic	intergenic	intergenic	1.15125	-0.896799	13.695	0.000469831	0.00807658	0.468767	11.1896	65.9446	1.40651e-06	1.32259e-05	0	0	FALSE	FALSE	FALSE	FALSE	FALSE	FALSE
chr1	25927651	25928920	1270	*	mm10_rmsk	exon	6127		L1Md_F	L1Md_F_dup55	L1	LINE	-68239	RP24-228I17.1	ENSMUST00000185358.1	intergenic	intergenic	intergenic	1.16613	-1.28265	10.7814	0.00171508	0.0216164	0.68782	11.2456	113.731	7.70863e-08	3.05101e-06	0	0	FALSE	FALSE	FALSE	FALSE	FALSE	FALSE
chr1	25982092	25983630	1539	*	mm10_rmsk	exon	15906		L1VL2	L1VL2_dup74	L1	LINE	-13529	RP24-228I17.1	ENSMUST00000185358.1	intergenic	intergenic	intergenic	-1.25335	0.511243	27.2167	2.38952e-06	0.000130546	0.412803	11.1411	86.8287	2.83295e-07	5.12027e-06	0	0	TRUE	TRUE	TRUE	FALSE	FALSE	FALSE
chr1	25994595	25995181	587	*	mm10_rmsk	exon	425		RLTR17B_Mm	RLTR17B_Mm_dup193	ERVK	LTR	-1978	RP24-228I17.1	ENSMUST00000185358.1	intergenic	intergenic	intergenic	1.45157	-2.1343	8.48709	0.00502191	0.0470079	0.843045	11.4296	151.218	1.93757e-08	2.16814e-06	0	0	FALSE	FALSE	FALSE	FALSE	FALSE	FALSE
chr1	26063246	26063698	453	*	mm10_rmsk	exon	2523		RMER19B2	RMER19B2_dup13	ERVK	LTR	66087	RP24-228I17.1	ENSMUST00000185358.1	intergenic	intergenic	intergenic	-1.72377	-0.474184	33.6067	2.69145e-07	2.64357e-05	0.205061	9.3526	53.5721	4.51132e-06	3.09704e-05	0	0	TRUE	FALSE	TRUE	FALSE	FALSE	FALSE
chr1	26063699	26063804	106	*	mm10_rmsk	exon	440		MTE-int	MTE-int_dup57	ERVL-MaLR	LTR	66540	RP24-228I17.1	ENSMUST00000185358.1	intergenic	intergenic	intergenic	-2.04743	-1.80571	17.2268	0.000106572	0.00251662	0.0385354	10.4156	2.99475	0.106163	0.144697	0	0	FALSE	FALSE	FALSE	FALSE	FALSE	FALSE
chr1	26064044	26064180	137	*	mm10_rmsk	exon	315		ORR1F	ORR1F_dup212	ERVL-MaLR	LTR	66885	RP24-228I17.1	ENSMUST00000185358.1	intergenic	intergenic	intergenic	-1.55722	-0.733844	19.1839	4.85114e-05	0.00135113	-0.0391757	12.46	2.04136	0.175651	0.223356	0	0	TRUE	FALSE	TRUE	FALSE	FALSE	FALSE
chr1	26064189	26064703	515	*	mm10_rmsk	exon	2265		RMER4B	RMER4B_dup35	ERVK	LTR	67030	RP24-228I17.1	ENSMUST00000185358.1	intergenic	intergenic	intergenic	-1.2412	-0.937179	12.1762	0.000914659	0.0134838	-0.0488324	10.4274	1.90913	0.189351	0.238339	0	0	TRUE	FALSE	TRUE	FALSE	FALSE	FALSE
chr1	26235097	26235478	382	*	mm10_rmsk	exon	2134		RLTR53_Mm	RLTR53_Mm	ERVK	LTR	-230758	RP24-264B17.1	ENSMUST00000190716.1	intergenic	intergenic	intergenic	-1.07289	-0.86493	10.8732	0.00164469	0.0209505	-0.344116	8.00741	23.0476	0.000325568	0.000867406	8.87638e-207	3.01211e-206	FALSE	FALSE	FALSE	FALSE	FALSE	FALSE
chr1	26271797	26273118	1322	*	mm10_rmsk	exon	7791		Lx3_Mus	Lx3_Mus_dup109	L1	LINE	-193118	RP24-264B17.1	ENSMUST00000190716.1	intergenic	intergenic	intergenic	1.42396	-1.40183	16.0775	0.000171092	0.00365549	0.490828	12.3525	77.1477	5.68276e-07	7.57815e-06	0	0	FALSE	FALSE	FALSE	FALSE	TRUE	FALSE
chr1	26278220	26278609	390	*	mm10_rmsk	exon	861		MTD	MTD_dup438	ERVL-MaLR	LTR	-187627	RP24-264B17.1	ENSMUST00000190716.1	intergenic	intergenic	intergenic	-1.53536	0.0140903	31.1142	6.18444e-07	4.81218e-05	-0.128328	13.8494	24.9898	0.000212962	0.000611037	0	0	TRUE	TRUE	TRUE	FALSE	FALSE	FALSE
chr1	26344971	26345125	155	*	mm10_rmsk	exon	735		L1_Mus3	L1_Mus3_dup691	L1	LINE	-121111	RP24-264B17.1	ENSMUST00000190716.1	intergenic	intergenic	intergenic	1.76771	-2.46752	9.12663	0.00370196	0.0379104	0.491166	14.0232	104.073	9.55672e-08	3.14529e-06	0	0	FALSE	FALSE	FALSE	FALSE	FALSE	FALSE
chr1	26352792	26354036	1245	*	mm10_rmsk	exon	8010		IAPEz-int	IAPEz-int_dup86	ERVK	LTR	-112200	RP24-264B17.1	ENSMUST00000190716.1	intergenic	intergenic	intergenic	1.24639	-1.48018	12.3239	0.00085658	0.0128215	0.735264	12.6535	101.014	2.6591e-07	5.12027e-06	0	0	FALSE	FALSE	FALSE	FALSE	FALSE	FALSE
chr1	26363893	26364265	373	*	mm10_rmsk	exon	1763		Lx4A	Lx4A_dup90	L1	LINE	-101971	RP24-264B17.1	ENSMUST00000190716.1	intergenic	intergenic	intergenic	-1.38456	-0.602446	18.1912	7.21022e-05	0.00185053	0.386963	11.9984	67.5375	1.22707e-06	1.22598e-05	0	0	FALSE	FALSE	FALSE	FALSE	FALSE	FALSE
chr1	26364627	26364825	199	*	mm10_rmsk	exon	1242		Lx4A	Lx4A_dup91	L1	LINE	-101411	RP24-264B17.1	ENSMUST00000190716.1	intergenic	intergenic	intergenic	-1.42602	-1.11788	17.8821	8.16692e-05	0.00204208	0.386963	11.9984	67.5375	1.22707e-06	1.22598e-05	0	0	TRUE	FALSE	TRUE	FALSE	FALSE	FALSE
chr1	26401296	26403766	2471	*	mm10_rmsk	exon	5916		L1_Mur3	L1_Mur3_dup344	L1	LINE	-62470	RP24-264B17.1	ENSMUST00000190716.1	intergenic	intergenic	intergenic	1.14172	-1.58691	8.41564	0.00519742	0.0481517	0.334543	12.3059	85.3852	3.12894e-07	5.33454e-06	0	0	FALSE	FALSE	FALSE	FALSE	FALSE	FALSE
chr1	26412849	26413016	168	*	mm10_rmsk	exon	320		IMPB_01	IMPB_01_dup152	Satellite	Satellite	-53220	RP24-264B17.1	ENSMUST00000190716.1	intergenic	intergenic	intergenic	2.41092	-2.78286	10.1192	0.002326	0.0271142	0.274633	11.8608	41.784	1.71433e-05	8.23859e-05	0	0	FALSE	FALSE	FALSE	FALSE	FALSE	FALSE
chr1	26521539	26523603	2065	*	mm10_rmsk	exon	7997		ORR1B1-int	ORR1B1-int_dup26	ERVL-MaLR	LTR	-43230	Gm24064	ENSMUST00000157486.1	intergenic	intergenic	intergenic	1.10279	-0.897676	12.9625	0.000646367	0.0103437	0.312658	9.65688	106.325	8.39243e-08	3.05101e-06	0	0	FALSE	FALSE	FALSE	FALSE	FALSE	FALSE
chr1	26548198	26548305	108	*	mm10_rmsk	exon	470		MT2A	MT2A_dup68	ERVL	LTR	-18528	Gm24064	ENSMUST00000157486.1	intergenic	intergenic	intergenic	-2.17753	-2.10044	17.7579	8.58787e-05	0.00212457	0.0807366	11.1268	8.80359	0.0104713	0.018511	0	0	FALSE	FALSE	FALSE	FALSE	FALSE	FALSE
chr1	26548306	26548659	354	*	mm10_rmsk	exon	2978		IAPEY2_LTR	IAPEY2_LTR_dup12	ERVK	LTR	-18174	Gm24064	ENSMUST00000157486.1	intergenic	intergenic	intergenic	-1.1791	0.0124521	19.5478	4.2015e-05	0.00120503	-0.226594	9.27795	4.94242	0.0479035	0.0718552	4.15636e-246	1.60296e-245	TRUE	TRUE	TRUE	FALSE	FALSE	FALSE
chr1	26616922	26617265	344	*	mm10_rmsk	exon	1039		RLTR16	RLTR16_dup10	ERVK	LTR	50089	Gm24064	ENSMUST00000157486.1	intergenic	intergenic	intergenic	-1.08265	0.0800488	12.7495	0.000742734	0.011504	-0.606175	9.71973	56.7447	7.17152e-06	4.38521e-05	0	0	TRUE	TRUE	TRUE	TRUE	FALSE	TRUE
chr1	26617320	26617431	112	*	mm10_rmsk	exon	1039		RLTR16	RLTR16_dup11	ERVK	LTR	50487	Gm24064	ENSMUST00000157486.1	intergenic	intergenic	intergenic	-1.32254	-1.52932	9.67645	0.00285821	0.0315033	-0.606175	9.71973	56.7447	7.17152e-06	4.38521e-05	0	0	FALSE	FALSE	FALSE	TRUE	FALSE	TRUE
chr1	26627837	26628182	346	*	mm10_rmsk	exon	1633		RMER17D2	RMER17D2_dup41	ERVK	LTR	-59278	RP24-338N17.1	ENSMUST00000097801.3	intergenic	intergenic	intergenic	1.452	-1.97352	10.0068	0.00245048	0.0281673	0.296254	9.59916	6.55903	0.027266	0.043339	0	0	FALSE	FALSE	FALSE	FALSE	FALSE	FALSE
chr1	26628314	26628834	521	*	mm10_rmsk	exon	3971		L1_Mus1	L1_Mus1_dup459	L1	LINE	-58626	RP24-338N17.1	ENSMUST00000097801.3	intergenic	intergenic	intergenic	1.94748	-1.88975	17.9725	7.87412e-05	0.00198439	0.568501	13.4728	115.916	4.95501e-08	3.05101e-06	0	0	FALSE	FALSE	FALSE	FALSE	FALSE	FALSE
chr1	26697304	26697464	161	*	mm10_rmsk	exon	879		L1_Mus3	L1_Mus3_dup705	L1	LINE	9844	RP24-338N17.1	ENSMUST00000097801.3	intergenic	intergenic	intergenic	-1.63414	-1.99632	12.6467	0.000742637	0.0115029	0.491166	14.0232	104.073	9.55672e-08	3.14529e-06	0	0	TRUE	FALSE	TRUE	FALSE	FALSE	FALSE
chr1	26739673	26740493	821	*	mm10_rmsk	exon	6417		RLTR13B2	RLTR13B2_dup9	ERVK	LTR	52213	RP24-338N17.1	ENSMUST00000097801.3	intergenic	intergenic	intergenic	-1.07628	0.0351662	16.8674	0.000123463	0.00282592	-0.0200359	7.6628	0.16801	0.688274	0.720466	3.29158e-93	7.45387e-93	FALSE	FALSE	FALSE	FALSE	FALSE	FALSE
chr1	26774360	26774617	258	*	mm10_rmsk	exon	1099		Lx2B2	Lx2B2_dup86	L1	LINE	86900	RP24-338N17.1	ENSMUST00000097801.3	intergenic	intergenic	intergenic	-1.05412	-0.595062	14.2318	0.000372873	0.00674468	0.429993	12.0294	66.9103	1.29439e-06	1.24864e-05	0	0	TRUE	FALSE	TRUE	FALSE	FALSE	FALSE
chr1	26890006	26891583	1578	*	mm10_rmsk	exon	10023		Lx2B	Lx2B_dup55	L1	LINE	-67638	n-R5s209	ENSMUST00000179494.1	intergenic	intergenic	intergenic	-1.15695	1.78964	21.0383	2.34975e-05	0.000762919	0.21701	11.4789	26.956	0.000150288	0.000460745	0	0	TRUE	TRUE	TRUE	FALSE	FALSE	FALSE
chr1	26942006	26943181	1176	*	mm10_rmsk	exon	5040		Lx3_Mus	Lx3_Mus_dup120	L1	LINE	-16040	n-R5s209	ENSMUST00000179494.1	intergenic	intergenic	intergenic	1.22688	-1.45235	10.9973	0.00155435	0.0200951	0.490828	12.3525	77.1477	5.68276e-07	7.57815e-06	0	0	FALSE	FALSE	FALSE	FALSE	FALSE	FALSE
chr1	27005767	27006588	822	*	mm10_rmsk	exon	968		Lx8	Lx8_dup489	L1	LINE	46546	n-R5s209	ENSMUST00000179494.1	intergenic	intergenic	intergenic	1.81788	-2.18599	11.7486	0.00110706	0.0155896	0.121817	13.7403	15.9377	0.00141182	0.00306763	0	0	FALSE	FALSE	FALSE	FALSE	FALSE	FALSE
chr1	27041131	27041471	341	*	mm10_rmsk	exon	2178		L1_Mus3	L1_Mus3_dup724	L1	LINE	81910	n-R5s209	ENSMUST00000179494.1	intergenic	intergenic	intergenic	1.63351	-2.24573	9.62931	0.00292195	0.0320223	0.491166	14.0232	104.073	9.55672e-08	3.14529e-06	0	0	FALSE	FALSE	FALSE	FALSE	FALSE	FALSE
chr1	27042660	27043067	408	*	mm10_rmsk	exon	2526		Lx	Lx_dup280	L1	LINE	83439	n-R5s209	ENSMUST00000179494.1	intergenic	intergenic	intergenic	-1.02911	-1.27617	8.58768	0.00478528	0.0454509	0.402447	13.336	70.3906	9.67384e-07	1.0572e-05	0	0	FALSE	FALSE	FALSE	FALSE	FALSE	FALSE
chr1	27064876	27065156	281	*	mm10_rmsk	exon	1272		RLTR20D	RLTR20D_dup10	ERVK	LTR	105655	n-R5s209	ENSMUST00000179494.1	intergenic	intergenic	intergenic	-1.51496	-0.337629	30.33	8.07582e-07	5.8554e-05	-0.826087	9.45256	38.1948	9.17838e-05	0.000306794	0	0	TRUE	TRUE	TRUE	FALSE	FALSE	FALSE
chr1	27109790	27110052	263	*	mm10_rmsk	exon	353		RMER13B	RMER13B_dup28	ERVK	LTR	150569	n-R5s209	ENSMUST00000179494.1	intergenic	intergenic	intergenic	-1.26208	-1.35635	10.9278	0.00160425	0.0205669	-0.464354	11.2305	71.0692	9.15296e-07	1.03456e-05	0	0	FALSE	FALSE	TRUE	FALSE	FALSE	FALSE
chr1	27176949	27178586	1638	*	mm10_rmsk	exon	12649		L1_Mus1	L1_Mus1_dup475	L1	LINE	-158182	RP23-76B18.1	ENSMUST00000188432.1	intergenic	intergenic	intergenic	1.30985	-1.30765	13.7955	0.000449871	0.00780582	0.568501	13.4728	115.916	4.95501e-08	3.05101e-06	0	0	FALSE	FALSE	FALSE	FALSE	FALSE	FALSE
chr1	27230830	27231619	790	*	mm10_rmsk	exon	3859		RMER17D2	RMER17D2_dup43	ERVK	LTR	-105149	RP23-76B18.1	ENSMUST00000188432.1	intergenic	intergenic	intergenic	1.20296	-1.68887	9.35598	0.00332204	0.0351085	0.296254	9.59916	6.55903	0.027266	0.043339	0	0	FALSE	FALSE	FALSE	FALSE	FALSE	FALSE
chr1	27301997	27302474	478	*	mm10_rmsk	exon	1969		RMER1B	RMER1B_dup70	RMER1B	Other	-34294	RP23-76B18.1	ENSMUST00000188432.1	intergenic	intergenic	intergenic	-1.29604	-1.62675	8.82497	0.00427225	0.0419627	0.0433976	12.0162	1.19464	0.29339	0.345947	0	0	FALSE	FALSE	FALSE	FALSE	FALSE	FALSE
chr1	27442417	27442960	544	*	mm10_rmsk	exon	4261		MTB_Mm-int	MTB_Mm-int_dup7	ERVL-MaLR	LTR	105649	RP23-76B18.1	ENSMUST00000188432.1	intergenic	intergenic	intergenic	-1.44502	-0.397361	28.3695	1.59131e-06	9.64573e-05	0.358441	7.24543	70.3667	9.69279e-07	1.0572e-05	4.76126e-93	1.07604e-92	FALSE	FALSE	FALSE	FALSE	FALSE	FALSE
chr1	27443341	27443735	395	*	mm10_rmsk	exon	4261		MTB_Mm-int	MTB_Mm-int_dup8	ERVL-MaLR	LTR	106573	RP23-76B18.1	ENSMUST00000188432.1	intergenic	intergenic	intergenic	-1.00446	-0.133882	14.7843	0.000294568	0.00560499	0.358441	7.24543	70.3667	9.69279e-07	1.0572e-05	4.76126e-93	1.07604e-92	TRUE	FALSE	FALSE	FALSE	FALSE	FALSE
chr1	27480948	27481307	360	*	mm10_rmsk	exon	2513		ERVB7_2-LTR_MM	ERVB7_2-LTR_MM_dup8	ERVK	LTR	144180	RP23-76B18.1	ENSMUST00000188432.1	intergenic	intergenic	intergenic	-1.0063	0.544197	17.5611	9.30115e-05	0.00226204	-0.621661	8.013	46.3455	2.01687e-05	9.40363e-05	3.70047e-290	1.62075e-289	TRUE	TRUE	TRUE	FALSE	FALSE	FALSE
chr1	27637802	27638235	434	*	mm10_rmsk	exon	2889		Lx	Lx_dup304	L1	LINE	-245811	RP24-176K12.1	ENSMUST00000185409.1	intergenic	intergenic	intergenic	1.30763	-1.51645	10.7152	0.00176784	0.0221107	0.402447	13.336	70.3906	9.67384e-07	1.0572e-05	0	0	FALSE	FALSE	FALSE	FALSE	FALSE	FALSE
chr1	27806436	27807003	568	*	mm10_rmsk	exon	3704		L1_Mus3	L1_Mus3_dup764	L1	LINE	-77043	RP24-176K12.1	ENSMUST00000185409.1	intergenic	intergenic	intergenic	1.59583	-1.87544	14.2124	0.00037598	0.00678824	0.491166	14.0232	104.073	9.55672e-08	3.14529e-06	0	0	FALSE	FALSE	FALSE	FALSE	FALSE	FALSE
chr1	27846757	27847050	294	*	mm10_rmsk	exon	1639		RLTR23	RLTR23_dup16	ERV1	LTR	-36996	RP24-176K12.1	ENSMUST00000185409.1	intergenic	intergenic	intergenic	-1.45772	-1.84461	10.3474	0.00209315	0.0250772	0.0145172	9.21487	0.0446351	0.83592	0.854241	5.06759e-282	2.18564e-281	FALSE	FALSE	FALSE	FALSE	FALSE	FALSE
chr1	27902928	27903611	684	*	mm10_rmsk	exon	4276		L1_Mus4	L1_Mus4_dup169	L1	LINE	1856	RP24-176K12.2	ENSMUST00000188833.1	intergenic	intergenic	intergenic	-1.08508	-0.578092	14.7718	0.00029614	0.0056295	0.534569	12.2714	89.1906	2.41524e-07	5.00491e-06	0	0	TRUE	FALSE	FALSE	FALSE	FALSE	FALSE
chr1	27945470	27945956	487	*	mm10_rmsk	exon	2952		Lx2B2	Lx2B2_dup98	L1	LINE	-43954	RP23-12H12.1	ENSMUST00000189614.1	intergenic	intergenic	intergenic	1.13314	-1.4717	9.85974	0.00262387	0.0295976	0.429993	12.0294	66.9103	1.29439e-06	1.24864e-05	0	0	FALSE	FALSE	FALSE	FALSE	FALSE	FALSE
chr1	28006583	28007138	556	*	mm10_rmsk	exon	1651		RMER15	RMER15_dup148	ERVL	LTR	16673	RP23-12H12.1	ENSMUST00000189614.1	intergenic	intergenic	intergenic	-1.23038	-0.0647017	19.8679	3.70465e-05	0.00109088	-0.386955	12.6786	57.0863	3.17301e-06	2.43192e-05	0	0	TRUE	FALSE	TRUE	FALSE	FALSE	FALSE
chr1	28017308	28017584	277	*	mm10_rmsk	exon	386		Charlie1a	Charlie1a_dup21	hAT-Charlie	DNA	27398	RP23-12H12.1	ENSMUST00000189614.1	intergenic	intergenic	intergenic	1.83669	-2.56253	8.90392	0.00411461	0.0408572	0.0578911	8.97492	2.17869	0.162723	0.209296	8.39713e-259	3.35292e-258	FALSE	FALSE	FALSE	FALSE	FALSE	FALSE
chr1	28035136	28036175	1040	*	mm10_rmsk	exon	9903		L1_Mus3	L1_Mus3_dup776	L1	LINE	45226	RP23-12H12.1	ENSMUST00000189614.1	intergenic	intergenic	intergenic	2.71102	-2.40957	20.2048	3.24698e-05	0.00098432	0.491166	14.0232	104.073	9.55672e-08	3.14529e-06	0	0	FALSE	FALSE	FALSE	FALSE	FALSE	FALSE
chr1	28036189	28036995	807	*	mm10_rmsk	exon	4325		Lx3_Mus	Lx3_Mus_dup142	L1	LINE	46279	RP23-12H12.1	ENSMUST00000189614.1	intergenic	intergenic	intergenic	1.33336	-1.83481	8.49237	0.00500919	0.0469264	0.490828	12.3525	77.1477	5.68276e-07	7.57815e-06	0	0	FALSE	FALSE	FALSE	FALSE	FALSE	FALSE
chr1	28043635	28044721	1087	*	mm10_rmsk	exon	5518		Lx2B	Lx2B_dup62	L1	LINE	53725	RP23-12H12.1	ENSMUST00000189614.1	intergenic	intergenic	intergenic	1.28639	-1.36957	11.6042	0.00118122	0.0163633	0.21701	11.4789	26.956	0.000150288	0.000460745	0	0	FALSE	TRUE	FALSE	FALSE	FALSE	FALSE
chr1	28058815	28059597	783	*	mm10_rmsk	exon	2182		RLTR25B	RLTR25B_dup45	ERVK	LTR	68905	RP23-12H12.1	ENSMUST00000189614.1	intergenic	intergenic	intergenic	-1.03078	0.276352	15.7251	0.000198172	0.00410415	0.118739	9.31989	21.6616	0.000401777	0.00102646	0	0	TRUE	TRUE	TRUE	FALSE	FALSE	FALSE
chr1	28134513	28134769	257	*	mm10_rmsk	exon	1797		Lx3A	Lx3A_dup86	L1	LINE	144603	RP23-12H12.1	ENSMUST00000189614.1	intergenic	intergenic	intergenic	-1.3638	-0.858908	18.169	7.27479e-05	0.00186441	0.471895	11.8934	70.5091	9.58045e-07	1.0572e-05	0	0	FALSE	FALSE	FALSE	FALSE	FALSE	FALSE
chr1	28153106	28153364	259	*	mm10_rmsk	exon	272		RLTR17B_Mm	RLTR17B_Mm_dup217	ERVK	LTR	163196	RP23-12H12.1	ENSMUST00000189614.1	intergenic	intergenic	intergenic	3.29407	-2.61513	21.5425	1.93576e-05	0.000654209	0.843045	11.4296	151.218	1.93757e-08	2.16814e-06	0	0	FALSE	FALSE	FALSE	FALSE	FALSE	FALSE
chr1	28170964	28171329	366	*	mm10_rmsk	exon	2334		IAPEY2_LTR	IAPEY2_LTR_dup14	ERVK	LTR	181054	RP23-12H12.1	ENSMUST00000189614.1	intergenic	intergenic	intergenic	1.51269	-1.76056	12.8331	0.000684156	0.0107984	-0.226594	9.27795	4.94242	0.0479035	0.0718552	4.15636e-246	1.60296e-245	FALSE	FALSE	FALSE	FALSE	FALSE	FALSE
chr1	28171332	28172107	776	*	mm10_rmsk	exon	5330		IAPEy-int	IAPEy-int_dup11	ERVK	LTR	181422	RP23-12H12.1	ENSMUST00000189614.1	intergenic	intergenic	intergenic	1.29031	-1.5245	11.9978	0.000990315	0.0143258	0.367001	9.89237	43.781	1.34114e-05	6.66991e-05	9.54389e-178	2.95468e-177	FALSE	FALSE	FALSE	FALSE	FALSE	FALSE
chr1	28295459	28295581	123	*	mm10_rmsk	exon	2139		Lx6	Lx6_dup253	L1	LINE	-274337	RP23-19M20.2	ENSMUST00000193585.1	intergenic	intergenic	intergenic	2.01696	-2.44401	9.94705	0.00251941	0.0287368	0.298114	12.3587	77.597	5.49313e-07	7.53997e-06	0	0	FALSE	FALSE	FALSE	FALSE	FALSE	FALSE
chr1	28328356	28328485	130	*	mm10_rmsk	exon	242		RLTR51A_Mm	RLTR51A_Mm_dup30	ERVK	LTR	-241433	RP23-19M20.2	ENSMUST00000193585.1	intergenic	intergenic	intergenic	-1.34455	-1.59208	10.853	0.00165995	0.0210946	0.244304	8.95566	7.63279	0.0175094	0.0291129	3.25976e-273	1.39001e-272	TRUE	TRUE	FALSE	FALSE	FALSE	TRUE
chr1	28328400	28328479	80	*	mm10_rmsk	exon	273		RLTR31D_MM	RLTR31D_MM_dup78	ERVK	LTR	-241439	RP23-19M20.2	ENSMUST00000193585.1	intergenic	intergenic	intergenic	-1.38068	-1.70396	10.4175	0.00202661	0.0244772	-0.0364862	10.136	1.87594	0.193002	0.241577	0	0	FALSE	TRUE	FALSE	FALSE	FALSE	TRUE
chr1	28339533	28339570	38	*	mm10_rmsk	exon	290		B1_Mus2	B1_Mus2_dup460	Alu	SINE	-230348	RP23-19M20.2	ENSMUST00000193585.1	intergenic	intergenic	intergenic	-1.67754	-2.24601	9.3779	0.00328794	0.034861	-0.176162	13.8323	10.0652	0.00699884	0.0128811	0	0	FALSE	FALSE	FALSE	FALSE	FALSE	FALSE
chr1	28339579	28339917	339	*	mm10_rmsk	exon	2363		Lx3_Mus	Lx3_Mus_dup146	L1	LINE	-230001	RP23-19M20.2	ENSMUST00000193585.1	intergenic	intergenic	intergenic	-1.5319	-0.774699	25.6985	4.11908e-06	0.00019793	0.490828	12.3525	77.1477	5.68276e-07	7.57815e-06	0	0	TRUE	FALSE	TRUE	FALSE	FALSE	FALSE
chr1	28434817	28435212	396	*	mm10_rmsk	exon	1624		ORR1B1	ORR1B1_dup152	ERVL-MaLR	LTR	-134706	RP23-19M20.2	ENSMUST00000193585.1	intergenic	intergenic	intergenic	1.30772	-2.05722	8.62765	0.00469454	0.0448452	-0.0271086	12.3851	0.725931	0.408968	0.463194	0	0	FALSE	FALSE	FALSE	FALSE	FALSE	FALSE
chr1	28513200	28513636	437	*	mm10_rmsk	exon	773		L1MCa	L1MCa_dup25	L1	LINE	-56282	RP23-19M20.2	ENSMUST00000193585.1	intergenic	intergenic	intergenic	-1.25558	-1.51037	9.89773	0.00257787	0.0292194	0.0512897	9.21504	3.5333	0.0817567	0.115805	0	0	TRUE	FALSE	TRUE	FALSE	FALSE	FALSE
chr1	28565071	28565351	281	*	mm10_rmsk	exon	740		MTD	MTD_dup477	ERVL-MaLR	LTR	-4567	RP23-19M20.2	ENSMUST00000193585.1	intergenic	intergenic	intergenic	-1.09968	-0.527866	15.2656	0.000240314	0.00477931	-0.128328	13.8494	24.9898	0.000212962	0.000611037	0	0	TRUE	FALSE	TRUE	FALSE	FALSE	FALSE
chr1	28565544	28565614	71	*	mm10_rmsk	exon	245		IMPB_01	IMPB_01_dup161	Satellite	Satellite	-4304	RP23-19M20.2	ENSMUST00000193585.1	intergenic	intergenic	intergenic	-1.62211	-1.2914	21.3427	2.08996e-05	0.000695273	0.274633	11.8608	41.784	1.71433e-05	8.23859e-05	0	0	FALSE	FALSE	FALSE	FALSE	FALSE	FALSE
chr1	28591263	28591804	542	*	mm10_rmsk	exon	3993		L1_Mus3	L1_Mus3_dup810	L1	LINE	10491	AC122186.1	ENSMUST00000145844.2	intergenic	intergenic	intergenic	2.19257	-2.75125	9.01475	0.00390355	0.0393786	0.491166	14.0232	104.073	9.55672e-08	3.14529e-06	0	0	FALSE	FALSE	FALSE	FALSE	FALSE	FALSE
chr1	28599679	28600187	509	*	mm10_rmsk	exon	2154		L1_Mur3	L1_Mur3_dup401	L1	LINE	18907	AC122186.1	ENSMUST00000145844.2	intergenic	intergenic	intergenic	-1.4496	-1.88568	9.78414	0.002718	0.0303745	0.334543	12.3059	85.3852	3.12894e-07	5.33454e-06	0	0	TRUE	FALSE	TRUE	FALSE	FALSE	FALSE
chr1	28622515	28622773	259	*	mm10_rmsk	exon	2409		RLTR44B	RLTR44B_dup2	ERVK	LTR	41743	AC122186.1	ENSMUST00000145844.2	intergenic	intergenic	intergenic	-1.71769	0.276905	47.2497	4.14844e-09	1.67092e-06	-0.644022	8.8278	8.93543	0.0135405	0.0231679	3.7425e-170	1.1399e-169	TRUE	TRUE	TRUE	FALSE	FALSE	TRUE
chr1	28622826	28623023	198	*	mm10_rmsk	exon	2409		RLTR44B	RLTR44B_dup3	ERVK	LTR	42054	AC122186.1	ENSMUST00000145844.2	intergenic	intergenic	intergenic	-1.30221	1.27584	28.3287	1.61418e-06	9.74515e-05	-0.644022	8.8278	8.93543	0.0135405	0.0231679	3.7425e-170	1.1399e-169	TRUE	TRUE	TRUE	FALSE	FALSE	TRUE
chr1	28623024	28623172	149	*	mm10_rmsk	exon	354		Lx5c	Lx5c_dup232	L1	LINE	42252	AC122186.1	ENSMUST00000145844.2	intergenic	intergenic	intergenic	-1.31757	0.676186	24.9013	5.50591e-06	0.000247118	0.275621	12.3036	49.7246	6.78061e-06	4.22898e-05	0	0	TRUE	TRUE	TRUE	FALSE	FALSE	FALSE
chr1	28643542	28644762	1221	*	mm10_rmsk	exon	3295		L1_Mur3	L1_Mur3_dup402	L1	LINE	62770	AC122186.1	ENSMUST00000145844.2	intergenic	intergenic	intergenic	1.17358	-1.57611	8.97708	0.00397399	0.0398753	0.334543	12.3059	85.3852	3.12894e-07	5.33454e-06	0	0	FALSE	FALSE	FALSE	FALSE	FALSE	FALSE
chr1	28698635	28698773	139	*	mm10_rmsk	exon	308		L1M4	L1M4_dup126	L1	LINE	-81479	Gm597	ENSMUST00000059937.4	intergenic	intergenic	intergenic	-1.59317	-1.1395	20.9633	2.41875e-05	0.000780244	0.0357156	11.0706	1.17363	0.297501	0.350425	0	0	TRUE	TRUE	TRUE	FALSE	FALSE	FALSE
chr1	28708515	28709090	576	*	mm10_rmsk	exon	3323		RMER17B2	RMER17B2_dup12	ERVK	LTR	-71162	Gm597	ENSMUST00000059937.4	intergenic	intergenic	intergenic	-1.12729	0.329723	19.5882	4.13505e-05	0.00118971	-0.624956	10.1127	50.8372	1.4714e-05	7.18993e-05	0	0	TRUE	TRUE	TRUE	FALSE	FALSE	FALSE
chr1	28715768	28716513	746	*	mm10_rmsk	exon	5881		L1_Mus1	L1_Mus1_dup504	L1	LINE	-63739	Gm597	ENSMUST00000059937.4	intergenic	intergenic	intergenic	1.13782	-1.6538	8.44679	0.00512013	0.047646	0.568501	13.4728	115.916	4.95501e-08	3.05101e-06	0	0	FALSE	FALSE	FALSE	FALSE	FALSE	TRUE
chr1	28721864	28722613	750	*	mm10_rmsk	exon	4653		Lx2A	Lx2A_dup13	L1	LINE	-57639	Gm597	ENSMUST00000059937.4	intergenic	intergenic	intergenic	-1.15785	-0.129091	20.9051	2.47378e-05	0.000794048	0.103093	9.41107	5.91086	0.029537	0.0464865	0	0	TRUE	TRUE	TRUE	FALSE	FALSE	FALSE
chr1	28800542	28801043	502	*	mm10_rmsk	exon	4061		RLTR1C	RLTR1C_dup14	ERV1	LTR	-1678	AC121566.1	ENSMUST00000122295.2	exonic	exonic	gene_body	-1.92813	-0.233041	47.0932	4.33778e-09	1.70474e-06	0.219365	7.66262	35.2071	4.12507e-05	0.000155944	8.13898e-77	1.70316e-76	FALSE	FALSE	FALSE	FALSE	FALSE	TRUE
chr1	28821790	28822526	737	*	mm10_rmsk	exon	3900		Lx2B2	Lx2B2_dup104	L1	LINE	19069	AC121566.1	ENSMUST00000122295.2	intergenic	intergenic	intergenic	1.54195	-1.70982	13.1421	0.000597511	0.00973544	0.429993	12.0294	66.9103	1.29439e-06	1.24864e-05	0	0	FALSE	FALSE	FALSE	FALSE	FALSE	FALSE
chr1	28844169	28844306	138	*	mm10_rmsk	exon	987		B1_Mus1	B1_Mus1_dup705	Alu	SINE	41448	AC121566.1	ENSMUST00000122295.2	intergenic	intergenic	intergenic	2.00681	-2.32296	12.9948	0.00063728	0.0102345	-0.146129	14.2108	8.59991	0.011203	0.0196492	0	0	FALSE	FALSE	FALSE	FALSE	FALSE	FALSE
chr1	28858156	28858882	727	*	mm10_rmsk	exon	1843		RMER13A2	RMER13A2_dup20	ERVK	LTR	55435	AC121566.1	ENSMUST00000122295.2	intergenic	intergenic	intergenic	-1.004	-0.51695	12.0046	0.000987325	0.0142915	-0.29627	10.0049	55.3401	3.7707e-06	2.7222e-05	0	0	FALSE	FALSE	FALSE	FALSE	FALSE	FALSE
chr1	28859004	28859359	356	*	mm10_rmsk	exon	2281		RLTR9D2	RLTR9D2_dup7	ERVK	LTR	56283	AC121566.1	ENSMUST00000122295.2	intergenic	intergenic	intergenic	-1.4003	0.34983	24.3044	6.85614e-06	0.000292612	0.0996223	6.14913	2.61958	0.128515	0.169987	6.60713e-56	1.22999e-55	TRUE	TRUE	TRUE	FALSE	FALSE	FALSE
chr1	28859360	28859506	147	*	mm10_rmsk	exon	348		L1MCa	L1MCa_dup27	L1	LINE	56639	AC121566.1	ENSMUST00000122295.2	intergenic	intergenic	intergenic	-1.55163	-0.67416	21.0142	2.37166e-05	0.000768328	0.0512897	9.21504	3.5333	0.0817567	0.115805	0	0	TRUE	FALSE	TRUE	FALSE	FALSE	FALSE
chr1	28859550	28859978	429	*	mm10_rmsk	exon	348		L1MCa	L1MCa_dup28	L1	LINE	56829	AC121566.1	ENSMUST00000122295.2	intergenic	intergenic	intergenic	-1.35995	-1.10436	13.6838	0.000472124	0.00810715	0.0512897	9.21504	3.5333	0.0817567	0.115805	0	0	FALSE	FALSE	TRUE	FALSE	FALSE	FALSE
chr1	28877459	28877671	213	*	mm10_rmsk	exon	489		ID_B1	ID_B1_dup596	B4	SINE	-60365	RP24-365G17.1	ENSMUST00000081488.2	intergenic	intergenic	intergenic	-1.14346	-1.67882	8.53971	0.00489662	0.0461989	-0.175808	14.6041	23.3246	0.000290382	0.000788684	0	0	FALSE	FALSE	FALSE	FALSE	FALSE	FALSE
chr1	29025236	29025854	619	*	mm10_rmsk	exon	3703		Lx	Lx_dup332	L1	LINE	87200	RP24-365G17.1	ENSMUST00000081488.2	intergenic	intergenic	intergenic	-1.06978	-0.297812	16.0376	0.000173958	0.00370369	0.402447	13.336	70.3906	9.67384e-07	1.0572e-05	0	0	TRUE	FALSE	TRUE	FALSE	FALSE	FALSE
chr1	29053770	29054140	371	*	mm10_rmsk	exon	2460		ERVB7_2B-LTR_MM	ERVB7_2B-LTR_MM_dup9	ERVK	LTR	115734	RP24-365G17.1	ENSMUST00000081488.2	intergenic	intergenic	intergenic	-1.45116	-0.198107	24.8373	5.63644e-06	0.000251371	-0.835739	8.79374	51.3472	2.05966e-05	9.52381e-05	0	0	TRUE	TRUE	TRUE	FALSE	FALSE	FALSE
chr1	29171214	29171507	294	*	mm10_rmsk	exon	1449		Lx5	Lx5_dup183	L1	LINE	-48193	RP24-430C1.1	ENSMUST00000186678.1	intergenic	intergenic	intergenic	-1.35818	-0.184211	25.8672	3.87519e-06	0.000189032	0.344861	12.7349	51.5136	5.59317e-06	3.66009e-05	0	0	TRUE	TRUE	TRUE	FALSE	FALSE	FALSE
chr1	29171612	29171826	215	*	mm10_rmsk	exon	673		B3	B3_dup996	B2	SINE	-47874	RP24-430C1.1	ENSMUST00000186678.1	intergenic	intergenic	intergenic	-1.03533	-1.11342	9.9728	0.00248943	0.0284951	-0.0408682	15.0047	1.97967	0.18188	0.229711	0	0	FALSE	FALSE	FALSE	FALSE	FALSE	FALSE
chr1	29181161	29181304	144	*	mm10_rmsk	exon	992		B1_Mm	B1_Mm_dup369	Alu	SINE	-38396	RP24-430C1.1	ENSMUST00000186678.1	intergenic	intergenic	intergenic	-1.14449	1.57992	23.367	9.70929e-06	0.000383184	-0.134862	12.9233	6.73414	0.0215837	0.0353101	0	0	TRUE	TRUE	TRUE	FALSE	FALSE	FALSE
chr1	29181305	29181391	87	*	mm10_rmsk	exon	309		Lx8b	Lx8b_dup272	L1	LINE	-38309	RP24-430C1.1	ENSMUST00000186678.1	intergenic	intergenic	intergenic	-1.13365	2.47188	21.4305	2.02073e-05	0.000676793	0.344871	12.3091	95.7401	1.58107e-07	3.87825e-06	0	0	TRUE	TRUE	TRUE	FALSE	FALSE	FALSE
chr1	29181590	29181828	239	*	mm10_rmsk	exon	300		Lx10	Lx10_dup134	L1	LINE	-37872	RP24-430C1.1	ENSMUST00000186678.1	intergenic	intergenic	intergenic	-1.07357	1.06873	18.1377	7.36715e-05	0.00188267	0.382526	10.7781	149.374	1.02894e-08	1.64483e-06	0	0	TRUE	FALSE	TRUE	FALSE	FALSE	FALSE
chr1	29218013	29218143	131	*	mm10_rmsk	exon	394		PB1D10	PB1D10_dup419	Alu	SINE	-1557	RP24-430C1.1	ENSMUST00000186678.1	intergenic	intergenic	intergenic	-2.06942	-2.51586	9.50489	0.00309743	0.0333935	-0.196601	13.5951	25.3633	0.00019904	0.000578507	0	0	FALSE	FALSE	FALSE	FALSE	FALSE	FALSE
chr1	29218293	29218577	285	*	mm10_rmsk	exon	2296		IAPEY5_LTR	IAPEY5_LTR_dup3	ERVK	LTR	-1123	RP24-430C1.1	ENSMUST00000186678.1	intergenic	intergenic	intergenic	-1.57501	-1.59877	14.974	0.000271799	0.00526133	-0.313504	6.37934	19.341	0.000650109	0.00156783	5.39958e-71	1.09543e-70	TRUE	FALSE	TRUE	FALSE	FALSE	FALSE
chr1	29279011	29279992	982	*	mm10_rmsk	exon	6844		L1Md_F2	L1Md_F2_dup899	L1	LINE	-1083	Gm25586	ENSMUST00000082499.1	intergenic	intergenic	intergenic	1.23137	-1.7153	8.55923	0.004851	0.0458989	0.519061	15.1429	139.838	1.55383e-08	1.93193e-06	0	0	FALSE	FALSE	FALSE	FALSE	FALSE	FALSE
chr1	29359732	29360380	649	*	mm10_rmsk	exon	4789		MERVL_2A-int	MERVL_2A-int	ERVL	LTR	-990	Gm23785	ENSMUST00000116741.1	intergenic	proximal <=1000bp	Tss_prox_1kbp	1.39928	-1.96693	9.49612	0.0031102	0.0334895	0.421914	10.1471	113.592	5.60901e-08	3.05101e-06	0	0	FALSE	FALSE	FALSE	FALSE	FALSE	FALSE
chr1	29430010	29430907	898	*	mm10_rmsk	exon	7038		L1Md_F2	L1Md_F2_dup905	L1	LINE	8522	Mir6342	ENSMUST00000183870.1	intergenic	intergenic	intergenic	1.02699	-1.09369	9.46758	0.00315216	0.0338236	0.519061	15.1429	139.838	1.55383e-08	1.93193e-06	0	0	FALSE	FALSE	FALSE	FALSE	FALSE	FALSE
chr1	29570898	29570996	99	*	mm10_rmsk	exon	1758		RMER17C	RMER17C_dup80	ERVK	LTR	84983	RP23-313K8.2	ENSMUST00000190438.1	intergenic	intergenic	intergenic	-1.08376	-1.11753	9.75851	0.0027507	0.0306388	-0.174785	11.5718	3.94549	0.0712389	0.1022	0	0	TRUE	FALSE	FALSE	FALSE	FALSE	FALSE
chr1	29626267	29626636	370	*	mm10_rmsk	exon	1436		RLTR14	RLTR14_dup32	ERV1	LTR	140352	RP23-313K8.2	ENSMUST00000190438.1	intergenic	intergenic	intergenic	1.72451	-2.26746	10.7927	0.00170628	0.0215337	0.0133794	9.19462	0.221146	0.645625	0.686092	7.29648e-300	3.32461e-299	FALSE	FALSE	FALSE	FALSE	FALSE	FALSE
chr1	29641662	29643264	1603	*	mm10_rmsk	exon	6210		Lx	Lx_dup352	L1	LINE	155747	RP23-313K8.2	ENSMUST00000190438.1	intergenic	intergenic	intergenic	1.16438	-1.07368	12.9673	0.000645024	0.0103273	0.402447	13.336	70.3906	9.67384e-07	1.0572e-05	0	0	FALSE	FALSE	FALSE	FALSE	FALSE	FALSE
chr1	29659071	29659414	344	*	mm10_rmsk	exon	2247		MuRRS-int	MuRRS-int_dup13	ERV1	LTR	173156	RP23-313K8.2	ENSMUST00000190438.1	intergenic	intergenic	intergenic	1.99402	-2.44698	11.8241	0.00107025	0.0151967	0.468155	9.21522	53.5213	4.98595e-06	3.37261e-05	7.53155e-198	2.48849e-197	FALSE	FALSE	FALSE	FALSE	FALSE	FALSE
chr1	29672465	29673025	561	*	mm10_rmsk	exon	572		L1MB1	L1MB1_dup35	L1	LINE	186550	RP23-313K8.2	ENSMUST00000190438.1	intergenic	intergenic	intergenic	1.47181	-2.05385	8.32503	0.00542933	0.0496413	0.130858	8.79501	19.6252	0.000611731	0.00148166	4.72299e-239	1.79093e-238	FALSE	FALSE	FALSE	FALSE	FALSE	FALSE
chr1	29675489	29676405	917	*	mm10_rmsk	exon	4742		RMER17A2	RMER17A2_dup35	ERVK	LTR	189574	RP23-313K8.2	ENSMUST00000190438.1	intergenic	intergenic	intergenic	1.0867	-1.3948	9.33519	0.00335473	0.0353505	-0.0432949	10.7533	0.0935766	0.765807	0.790533	0	0	FALSE	FALSE	FALSE	FALSE	FALSE	FALSE
chr1	29696394	29697367	974	*	mm10_rmsk	exon	6133		Lx3_Mus	Lx3_Mus_dup160	L1	LINE	210479	RP23-313K8.2	ENSMUST00000190438.1	intergenic	intergenic	intergenic	1.41698	-1.40808	15.1844	0.000248677	0.00490939	0.490828	12.3525	77.1477	5.68276e-07	7.57815e-06	0	0	FALSE	FALSE	FALSE	FALSE	FALSE	FALSE
chr1	29765835	29766324	490	*	mm10_rmsk	exon	3374		L1_Mus3	L1_Mus3_dup858	L1	LINE	-163770	RP24-229N7.1	ENSMUST00000190177.1	intergenic	intergenic	intergenic	1.74534	-1.80037	13.8962	0.000430724	0.00754712	0.491166	14.0232	104.073	9.55672e-08	3.14529e-06	0	0	FALSE	FALSE	FALSE	FALSE	FALSE	FALSE
chr1	29870300	29870392	93	*	mm10_rmsk	exon	509		Lx2	Lx2_dup283	L1	LINE	-59702	RP24-229N7.1	ENSMUST00000190177.1	intergenic	intergenic	intergenic	1.95561	-2.44347	11.4189	0.00128403	0.0174176	0.329614	12.88	47.1621	9.02254e-06	5.15113e-05	0	0	FALSE	FALSE	FALSE	FALSE	FALSE	FALSE
chr1	29916649	29917805	1157	*	mm10_rmsk	exon	3877		Lx4A	Lx4A_dup101	L1	LINE	-12289	RP24-229N7.1	ENSMUST00000190177.1	intergenic	intergenic	intergenic	1.51905	-1.56549	13.4282	0.000527477	0.00883326	0.386963	11.9984	67.5375	1.22707e-06	1.22598e-05	0	0	FALSE	FALSE	FALSE	FALSE	FALSE	FALSE
chr1	29919065	29919852	788	*	mm10_rmsk	exon	4794		Lx	Lx_dup360	L1	LINE	-10242	RP24-229N7.1	ENSMUST00000190177.1	intergenic	intergenic	intergenic	1.29309	-1.42326	13.6911	0.000470633	0.00808697	0.402447	13.336	70.3906	9.67384e-07	1.0572e-05	0	0	FALSE	TRUE	FALSE	FALSE	FALSE	FALSE
chr1	29939738	29940094	357	*	mm10_rmsk	exon	2557		L1Md_F2	L1Md_F2_dup945	L1	LINE	9644	RP24-229N7.1	ENSMUST00000190177.1	intergenic	intergenic	intergenic	2.49457	-2.21366	20.54	2.84965e-05	0.000888291	0.519061	15.1429	139.838	1.55383e-08	1.93193e-06	0	0	FALSE	FALSE	FALSE	FALSE	FALSE	FALSE
chr1	29969522	29970406	885	*	mm10_rmsk	exon	4006		RMER19B	RMER19B_dup34	ERVK	LTR	-15528	Gm23771	ENSMUST00000178702.1	intergenic	intergenic	intergenic	-1.30721	-0.766263	17.5567	9.31778e-05	0.00226492	0.154616	11.1902	30.1266	8.87635e-05	0.000298277	0	0	TRUE	FALSE	TRUE	FALSE	FALSE	FALSE
chr1	29978326	29979144	819	*	mm10_rmsk	exon	6752		RLTR13B2	RLTR13B2_dup11	ERVK	LTR	-6790	Gm23771	ENSMUST00000178702.1	intergenic	intergenic	intergenic	-1.17074	-0.210393	19.25	4.72589e-05	0.00132384	-0.0200359	7.6628	0.16801	0.688274	0.720466	3.29158e-93	7.45387e-93	FALSE	FALSE	FALSE	FALSE	FALSE	FALSE
chr1	29985440	29985741	302	*	mm10_rmsk	exon	1751		IAPEY3_LTR	IAPEY3_LTR_dup15	ERVK	LTR	-193	Gm23771	ENSMUST00000178702.1	intergenic	proximal <=1000bp	Tss_prox_1kbp	-1.10923	-0.62033	13.1234	0.000602416	0.0097978	-0.203399	7.93343	7.86093	0.0147486	0.0249677	8.91461e-136	2.40993e-135	TRUE	TRUE	TRUE	FALSE	FALSE	FALSE
chr1	30007196	30008233	1038	*	mm10_rmsk	exon	2204		ORR1D2-int	ORR1D2-int_dup13	ERVL-MaLR	LTR	21262	Gm23771	ENSMUST00000178702.1	intergenic	intergenic	intergenic	-1.17568	0.945943	19.5547	4.19011e-05	0.00120223	0.196556	8.50158	35.6239	3.88813e-05	0.000150028	9.85405e-170	2.9933e-169	TRUE	TRUE	TRUE	FALSE	FALSE	FALSE
chr1	30080597	30081158	562	*	mm10_rmsk	exon	1768		MLTR31FA_MM	MLTR31FA_MM_dup5	ERVK	LTR	94663	Gm23771	ENSMUST00000178702.1	intergenic	intergenic	intergenic	2.03042	-2.34888	12.4508	0.000809743	0.0122789	-0.802573	8.68009	57.8974	9.5744e-06	5.20085e-05	0	0	FALSE	FALSE	FALSE	FALSE	FALSE	FALSE
chr1	30114677	30115802	1126	*	mm10_rmsk	exon	6682		Lx3A	Lx3A_dup108	L1	LINE	128743	Gm23771	ENSMUST00000178702.1	intergenic	intergenic	intergenic	1.29056	-1.34583	14.3571	0.000353387	0.00646327	0.471895	11.8934	70.5091	9.58045e-07	1.0572e-05	0	0	FALSE	FALSE	FALSE	FALSE	TRUE	TRUE
chr1	30118343	30118923	581	*	mm10_rmsk	exon	5392		L1_Mus4	L1_Mus4_dup198	L1	LINE	132409	Gm23771	ENSMUST00000178702.1	intergenic	intergenic	intergenic	1.36358	-1.82879	10.0218	0.00243343	0.0280266	0.534569	12.2714	89.1906	2.41524e-07	5.00491e-06	0	0	FALSE	FALSE	FALSE	FALSE	FALSE	TRUE
chr1	30211546	30212537	992	*	mm10_rmsk	exon	7970		L1Md_F2	L1Md_F2_dup969	L1	LINE	-120860	Gm27430	ENSMUST00000184585.1	intergenic	intergenic	intergenic	1.05282	-1.54314	8.30488	0.00548233	0.0499779	0.519061	15.1429	139.838	1.55383e-08	1.93193e-06	0	0	FALSE	FALSE	FALSE	FALSE	FALSE	FALSE
chr1	30232780	30233089	310	*	mm10_rmsk	exon	2313		L1Md_F2	L1Md_F2_dup972	L1	LINE	-100308	Gm27430	ENSMUST00000184585.1	intergenic	intergenic	intergenic	-1.32945	-0.779568	20.0008	3.51653e-05	0.00104739	0.519061	15.1429	139.838	1.55383e-08	1.93193e-06	0	0	TRUE	FALSE	TRUE	FALSE	FALSE	FALSE
chr1	30233375	30233594	220	*	mm10_rmsk	exon	1649		L1Md_F2	L1Md_F2_dup973	L1	LINE	-99803	Gm27430	ENSMUST00000184585.1	intergenic	intergenic	intergenic	-1.537	-1.99296	10.572	0.00188774	0.0232216	0.519061	15.1429	139.838	1.55383e-08	1.93193e-06	0	0	TRUE	FALSE	TRUE	FALSE	FALSE	FALSE
chr1	30249930	30250125	196	*	mm10_rmsk	exon	510		MLT1A	MLT1A_dup49	ERVL-MaLR	LTR	-83272	Gm27430	ENSMUST00000184585.1	intergenic	intergenic	intergenic	-1.01923	-0.868169	11.1411	0.00145599	0.0191375	0.0610476	9.99115	3.29711	0.0915206	0.126999	0	0	TRUE	TRUE	TRUE	FALSE	FALSE	FALSE
chr1	30346692	30347580	889	*	mm10_rmsk	exon	3682		Lx9	Lx9_dup737	L1	LINE	13295	Gm27430	ENSMUST00000184585.1	intergenic	intergenic	intergenic	1.0402	-1.22776	9.10038	0.00374825	0.0382524	0.366266	13.1834	126.776	2.85574e-08	2.45813e-06	0	0	FALSE	TRUE	FALSE	FALSE	FALSE	FALSE
chr1	30378234	30380446	2213	*	mm10_rmsk	exon	26529		L1_Mus2	L1_Mus2_dup422	L1	LINE	44837	Gm27430	ENSMUST00000184585.1	intergenic	intergenic	intergenic	1.20355	-0.80115	17.1557	0.000109711	0.00257468	0.484439	13.0175	105.113	8.99763e-08	3.05101e-06	0	0	FALSE	FALSE	FALSE	FALSE	FALSE	FALSE
chr1	30384926	30386589	1664	*	mm10_rmsk	exon	26529		L1_Mus2	L1_Mus2_dup426	L1	LINE	51529	Gm27430	ENSMUST00000184585.1	intergenic	intergenic	intergenic	1.17934	-1.37454	11.7564	0.00110322	0.0155501	0.484439	13.0175	105.113	8.99763e-08	3.05101e-06	0	0	FALSE	FALSE	FALSE	FALSE	FALSE	FALSE
chr1	30386978	30388177	1200	*	mm10_rmsk	exon	5529		Lx5c	Lx5c_dup256	L1	LINE	53581	Gm27430	ENSMUST00000184585.1	intergenic	intergenic	intergenic	1.35454	-1.37412	14.4317	0.000342304	0.0063075	0.275621	12.3036	49.7246	6.78061e-06	4.22898e-05	0	0	FALSE	FALSE	FALSE	FALSE	FALSE	FALSE
chr1	30486132	30486484	353	*	mm10_rmsk	exon	2408		Lx	Lx_dup377	L1	LINE	152735	Gm27430	ENSMUST00000184585.1	intergenic	intergenic	intergenic	-1.60325	-1.99265	11.7725	0.00109528	0.0154653	0.402447	13.336	70.3906	9.67384e-07	1.0572e-05	0	0	FALSE	FALSE	FALSE	FALSE	FALSE	FALSE
chr1	30495520	30496056	537	*	mm10_rmsk	exon	3380		Lx2A1	Lx2A1_dup38	L1	LINE	162123	Gm27430	ENSMUST00000184585.1	intergenic	intergenic	intergenic	-1.51802	1.50107	42.1808	1.82464e-08	4.21635e-06	-0.0369648	10.4239	0.553491	0.469563	0.522826	0	0	TRUE	TRUE	TRUE	FALSE	FALSE	FALSE
chr1	30515419	30515744	326	*	mm10_rmsk	exon	2653		Lx2	Lx2_dup287	L1	LINE	182022	Gm27430	ENSMUST00000184585.1	intergenic	intergenic	intergenic	-1.00245	0.316872	16.1553	0.000165653	0.00356329	0.329614	12.88	47.1621	9.02254e-06	5.15113e-05	0	0	TRUE	TRUE	TRUE	FALSE	FALSE	FALSE
chr1	30516217	30516283	67	*	mm10_rmsk	exon	242		Tigger5	Tigger5_dup16	TcMar-Tigger	DNA	182820	Gm27430	ENSMUST00000184585.1	intergenic	intergenic	intergenic	-1.97423	0.35543	54.6203	5.45711e-10	5.06822e-07	0.178469	8.39583	21.7198	0.000397127	0.0010169	4.54371e-152	1.30315e-151	TRUE	TRUE	TRUE	FALSE	FALSE	FALSE
chr1	30540038	30540286	249	*	mm10_rmsk	exon	625		ORR1E	ORR1E_dup200	ERVL-MaLR	LTR	-179676	RP24-172B22.1	ENSMUST00000065469.2	intergenic	intergenic	intergenic	-1.40161	-0.800714	18.5562	6.22833e-05	0.00164667	-0.325711	12.9387	82.3757	3.86776e-07	6.01114e-06	0	0	TRUE	FALSE	TRUE	FALSE	FALSE	FALSE
chr1	30540359	30540844	486	*	mm10_rmsk	exon	2291		RLTR20B3A_MM	RLTR20B3A_MM_dup6	ERVK	LTR	-179118	RP24-172B22.1	ENSMUST00000065469.2	intergenic	intergenic	intergenic	-1.52882	0.938291	36.0524	1.2172e-07	1.51154e-05	-0.47398	8.54788	45.977	1.15931e-05	6.0338e-05	1.43255e-233	5.34251e-233	TRUE	TRUE	TRUE	FALSE	FALSE	FALSE
chr1	30551156	30551298	143	*	mm10_rmsk	exon	239		MIRc	MIRc_dup130	MIR	SINE	-168664	RP24-172B22.1	ENSMUST00000065469.2	intergenic	intergenic	intergenic	-1.00794	0.974997	15.404	0.000226715	0.00456265	-0.193248	12.2077	46.807	9.39595e-06	5.20085e-05	0	0	TRUE	TRUE	TRUE	FALSE	FALSE	FALSE
chr1	30551764	30551904	141	*	mm10_rmsk	exon	293		MIR	MIR_dup240	MIR	SINE	-168058	RP24-172B22.1	ENSMUST00000065469.2	intergenic	intergenic	intergenic	-1.47646	-1.76141	12.3814	0.000835004	0.0125752	-0.0763741	12.8857	8.72251	0.0107557	0.0189413	0	0	FALSE	FALSE	FALSE	FALSE	FALSE	FALSE
chr1	30562720	30562995	276	*	mm10_rmsk	exon	332		L2	L2_dup185	L2	LINE	-156967	RP24-172B22.1	ENSMUST00000065469.2	intergenic	intergenic	intergenic	1.68644	-2.45748	8.89463	0.00413284	0.0409886	-0.0530077	12.0044	4.68269	0.0488031	0.0729114	0	0	FALSE	FALSE	FALSE	FALSE	FALSE	FALSE
chr1	30637810	30637931	122	*	mm10_rmsk	exon	280		LTR41	LTR41_dup4	ERVL	LTR	-82031	RP24-172B22.1	ENSMUST00000065469.2	intergenic	intergenic	intergenic	-1.13859	-0.99112	9.60128	0.00296055	0.0323229	-0.606087	7.90175	100.504	1.18028e-07	3.47561e-06	2.288e-244	8.79402e-244	FALSE	FALSE	FALSE	FALSE	FALSE	FALSE
chr1	30637966	30638041	76	*	mm10_rmsk	exon	324		RSINE1	RSINE1_dup707	B4	SINE	-81921	RP24-172B22.1	ENSMUST00000065469.2	intergenic	intergenic	intergenic	-1.566	-1.73989	13.3167	0.00055369	0.00917365	0.0578688	14.2698	3.88326	0.0694883	0.0999452	0	0	FALSE	FALSE	FALSE	FALSE	FALSE	FALSE
chr1	30716502	30716935	434	*	mm10_rmsk	exon	558		RMER17C	RMER17C_dup88	ERVK	LTR	-3027	RP24-172B22.1	ENSMUST00000065469.2	intergenic	intergenic	intergenic	1.84467	-2.33592	11.2792	0.0013677	0.0182701	-0.174785	11.5718	3.94549	0.0712389	0.1022	0	0	FALSE	FALSE	FALSE	FALSE	FALSE	FALSE
chr1	30716990	30717732	743	*	mm10_rmsk	exon	4452		RMER17D2	RMER17D2_dup54	ERVK	LTR	-2230	RP24-172B22.1	ENSMUST00000065469.2	intergenic	intergenic	intergenic	1.89782	-1.59698	21.0261	2.36082e-05	0.000765554	0.296254	9.59916	6.55903	0.027266	0.043339	0	0	FALSE	FALSE	FALSE	FALSE	FALSE	FALSE
chr1	30778564	30778785	222	*	mm10_rmsk	exon	249		ID_B1	ID_B1_dup611	B4	SINE	8877	RP24-172B22.2	ENSMUST00000188572.1	intergenic	intergenic	intergenic	-1.14774	0.0657028	21.4476	2.00752e-05	0.000673378	-0.175808	14.6041	23.3246	0.000290382	0.000788684	0	0	TRUE	TRUE	TRUE	FALSE	FALSE	FALSE
chr1	30779583	30779945	363	*	mm10_rmsk	exon	1103		MTE2b	MTE2b_dup129	ERVL-MaLR	LTR	9896	RP24-172B22.2	ENSMUST00000188572.1	intergenic	intergenic	intergenic	1.43534	-1.93031	10.8397	0.00167009	0.021187	-0.265936	12.1834	46.9875	9.20397e-06	5.1755e-05	0	0	FALSE	FALSE	FALSE	FALSE	FALSE	FALSE
chr1	30780413	30780590	178	*	mm10_rmsk	exon	738		B3	B3_dup1032	B2	SINE	10726	RP24-172B22.2	ENSMUST00000188572.1	intergenic	intergenic	intergenic	-1.43816	-0.52894	23.8664	8.06187e-06	0.000332058	-0.0408682	15.0047	1.97967	0.18188	0.229711	0	0	TRUE	TRUE	TRUE	FALSE	FALSE	FALSE
chr1	30785939	30786210	272	*	mm10_rmsk	exon	371		L4_C_Mam	L4_C_Mam_dup8	RTE-X	LINE	-8665	RP24-172B22.4	ENSMUST00000186120.1	intergenic	intergenic	intergenic	-1.13925	-1.08119	13.041	0.000624518	0.0100781	-0.109767	6.72646	6.25328	0.0258713	0.041357	3.47895e-67	6.92116e-67	TRUE	FALSE	TRUE	FALSE	FALSE	FALSE
chr1	30787213	30787338	126	*	mm10_rmsk	exon	542		B1_Mur2	B1_Mur2_dup210	Alu	SINE	-7537	RP24-172B22.4	ENSMUST00000186120.1	intergenic	intergenic	intergenic	-1.18331	-0.180853	14.3809	0.000349804	0.00641574	-0.133884	12.7428	10.2743	0.00656262	0.0121381	0	0	TRUE	FALSE	TRUE	FALSE	FALSE	TRUE
chr1	30787639	30787790	152	*	mm10_rmsk	exon	526		B1_Mur1	B1_Mur1_dup246	Alu	SINE	-7085	RP24-172B22.4	ENSMUST00000186120.1	intergenic	intergenic	intergenic	-1.73812	-0.566921	30.5372	7.52423e-07	5.56525e-05	-0.179663	13.0741	14.4372	0.00205038	0.00424761	0	0	FALSE	FALSE	FALSE	FALSE	FALSE	FALSE
chr1	30794250	30794378	129	*	mm10_rmsk	exon	259		Lx9	Lx9_dup758	L1	LINE	-497	RP24-172B22.4	ENSMUST00000186120.1	intergenic	proximal <=1000bp	Tss_prox_1kbp	-1.30377	-1.55592	10.2091	0.00223114	0.0262873	0.366266	13.1834	126.776	2.85574e-08	2.45813e-06	0	0	FALSE	FALSE	FALSE	FALSE	FALSE	FALSE
chr1	30833839	30834046	208	*	mm10_rmsk	exon	1101		URR1B	URR1B_dup149	hAT-Charlie	DNA	-2385	RP24-172B22.6	ENSMUST00000195437.1	exonic	exonic	gene_body	-1.03597	-0.789447	10.5248	0.00192908	0.0236046	0.0113244	11.7009	0.167068	0.689098	0.720655	0	0	TRUE	TRUE	TRUE	FALSE	FALSE	FALSE
chr1	30862053	30862122	70	*	mm10_rmsk	exon	305		ID4_	ID4__dup188	ID	SINE	-948	Phf3	ENSMUST00000187600.1	intronic	proximal <=1000bp	Tss_prox_1kbp	-1.73767	-2.31911	9.79109	0.00270919	0.0303044	-0.141335	12.0045	20.1414	0.000548502	0.00134679	0	0	FALSE	FALSE	FALSE	FALSE	FALSE	FALSE
chr1	30867441	30867549	109	*	mm10_rmsk	exon	236		B1_Mus1	B1_Mus1_dup753	Alu	SINE	-989	RP23-471J16.2	ENSMUST00000192050.1	exonic	proximal <=1000bp	Tss_prox_1kbp	-1.27166	-0.439875	21.2814	2.13974e-05	0.000708481	-0.146129	14.2108	8.59991	0.011203	0.0196492	0	0	TRUE	TRUE	TRUE	FALSE	FALSE	FALSE
chr1	30887502	30887570	69	*	mm10_rmsk	exon	1118		RMER4A	RMER4A_dup26	ERVK	LTR	13581	Phf3	ENSMUST00000191245.6	intergenic	intergenic	intergenic	-1.25608	-1.43457	11.0819	0.00149571	0.0195293	-0.292602	9.72959	28.5162	0.000115385	0.000368901	0	0	FALSE	FALSE	FALSE	FALSE	FALSE	FALSE
chr1	30887571	30887935	365	*	mm10_rmsk	exon	1426		MT2B2	MT2B2_dup25	ERVL	LTR	13650	Phf3	ENSMUST00000191245.6	intergenic	intergenic	intergenic	-1.03729	-1.11098	10.002	0.00245594	0.0282125	0.121731	9.34329	20.5697	0.000501704	0.00124757	0	0	FALSE	FALSE	FALSE	FALSE	FALSE	FALSE
chr1	30929292	30929685	394	*	mm10_rmsk	exon	2247		ORR1B1	ORR1B1_dup161	ERVL-MaLR	LTR	-14619	Ptp4a1	ENSMUST00000130934.1	intergenic	intergenic	intergenic	-1.09894	-0.0397904	18.4622	6.46714e-05	0.00169746	-0.0271086	12.3851	0.725931	0.408968	0.463194	0	0	TRUE	TRUE	TRUE	FALSE	FALSE	FALSE
chr1	30938044	30938260	217	*	mm10_rmsk	exon	425		MTD	MTD_dup530	ERVL-MaLR	LTR	-6044	Ptp4a1	ENSMUST00000130934.1	intergenic	intergenic	intergenic	-1.09479	0.484135	18.0873	7.51806e-05	0.00191351	-0.128328	13.8494	24.9898	0.000212962	0.000611037	0	0	TRUE	FALSE	TRUE	FALSE	FALSE	FALSE
chr1	30938261	30938407	147	*	mm10_rmsk	exon	1229		B1_Mus2	B1_Mus2_dup491	Alu	SINE	-5897	Ptp4a1	ENSMUST00000130934.1	intergenic	intergenic	intergenic	-1.21331	0.44981	20.2036	3.24856e-05	0.000984693	-0.176162	13.8323	10.0652	0.00699884	0.0128811	0	0	TRUE	FALSE	TRUE	FALSE	FALSE	FALSE
chr1	30938408	30938449	42	*	mm10_rmsk	exon	245		MTD	MTD_dup531	ERVL-MaLR	LTR	-5855	Ptp4a1	ENSMUST00000130934.1	intergenic	intergenic	intergenic	-1.30099	-0.433892	19.7918	3.81687e-05	0.00111706	-0.128328	13.8494	24.9898	0.000212962	0.000611037	0	0	TRUE	FALSE	TRUE	FALSE	FALSE	FALSE
chr1	30965939	30967464	1526	*	mm10_rmsk	exon	7478		L1Md_F2	L1Md_F2_dup1002	L1	LINE	-10503	AC153137.2	ENSMUST00000178317.2	intergenic	intergenic	intergenic	1.28862	-1.45703	12.2964	0.000867095	0.0129428	0.519061	15.1429	139.838	1.55383e-08	1.93193e-06	0	0	FALSE	FALSE	FALSE	FALSE	FALSE	FALSE
chr1	31000992	31001484	493	*	mm10_rmsk	exon	2586		MT2B1	MT2B1_dup82	ERVL	LTR	2086	AC121911.2	ENSMUST00000152491.2	intergenic	intergenic	intergenic	1.63209	-2.02715	10.4882	0.00196177	0.0238992	0.312012	10.3235	94.5783	1.70124e-07	3.88507e-06	0	0	FALSE	FALSE	FALSE	FALSE	FALSE	FALSE
chr1	31002193	31002997	805	*	mm10_rmsk	exon	8590		L1_Mus4	L1_Mus4_dup209	L1	LINE	3287	AC121911.2	ENSMUST00000152491.2	intergenic	intergenic	intergenic	1.39883	-1.65882	11.1563	0.00144601	0.0190403	0.534569	12.2714	89.1906	2.41524e-07	5.00491e-06	0	0	FALSE	FALSE	FALSE	FALSE	FALSE	FALSE
chr1	31002998	31003183	186	*	mm10_rmsk	exon	1301		B2_Mm1t	B2_Mm1t_dup193	B2	SINE	4092	AC121911.2	ENSMUST00000152491.2	intergenic	intergenic	intergenic	2.41345	-2.73824	9.82364	0.00266838	0.0299702	0.162653	12.0786	9.5898	0.00812187	0.0146351	0	0	FALSE	FALSE	FALSE	FALSE	FALSE	FALSE
chr1	31038203	31038822	620	*	mm10_rmsk	exon	3693		RLTR17	RLTR17_dup29	ERVK	LTR	-3097	RP24-173I18.2	ENSMUST00000191364.1	intronic	intronic	gene_body	-1.29671	2.86451	27.0451	2.53985e-06	0.000136756	-1.02879	11.7239	35.9714	0.000128195	0.000404086	0	0	TRUE	TRUE	TRUE	FALSE	FALSE	FALSE
chr1	31065217	31065339	123	*	mm10_rmsk	exon	257		LTR16A	LTR16A_dup15	ERVL	LTR	23298	RP24-173I18.2	ENSMUST00000191364.1	intronic	intronic	gene_body	-1.12201	-0.801977	14.7045	0.000304722	0.00575566	0.0205077	8.60995	0.217517	0.648325	0.688308	2.36809e-223	8.4149e-223	TRUE	FALSE	TRUE	FALSE	FALSE	FALSE
chr1	31098721	31098918	198	*	mm10_rmsk	exon	503		B4A	B4A_dup677	B4	SINE	2267	RP24-173I18.1	ENSMUST00000188605.1	intergenic	intergenic	intergenic	-1.57035	-0.596087	27.3774	2.25704e-06	0.000125262	0.0753296	14.4644	7.74941	0.0149756	0.0252756	0	0	TRUE	TRUE	TRUE	FALSE	FALSE	FALSE
chr1	31103756	31104090	335	*	mm10_rmsk	exon	2861		ORR1A0	ORR1A0_dup31	ERVL-MaLR	LTR	7302	RP24-173I18.1	ENSMUST00000188605.1	intergenic	intergenic	intergenic	1.46257	-2.24507	8.60405	0.00474789	0.0452021	0.438691	9.22922	73.4593	7.55825e-07	9.34872e-06	3.64695e-290	1.60352e-289	FALSE	FALSE	FALSE	FALSE	FALSE	FALSE
chr1	31107057	31107331	275	*	mm10_rmsk	exon	1710		MTC	MTC_dup303	ERVL-MaLR	LTR	10603	RP24-173I18.1	ENSMUST00000188605.1	intergenic	intergenic	intergenic	-1.07171	1.28527	20.2806	3.15239e-05	0.000961536	-0.0712501	12.9646	7.63021	0.0156148	0.0261341	0	0	TRUE	TRUE	TRUE	FALSE	FALSE	FALSE
chr1	31150561	31150686	126	*	mm10_rmsk	exon	638		ID_B1	ID_B1_dup634	B4	SINE	-13863	RP24-421A2.1	ENSMUST00000189666.1	intronic	intronic	gene_body	-1.07164	0.638015	16.4511	0.000146552	0.00323699	-0.175808	14.6041	23.3246	0.000290382	0.000788684	0	0	TRUE	TRUE	TRUE	TRUE	FALSE	FALSE
chr1	31151189	31151231	43	*	mm10_rmsk	exon	374		B3A	B3A_dup718	B2	SINE	-13318	RP24-421A2.1	ENSMUST00000189666.1	intronic	intronic	gene_body	-1.47739	-0.836719	16.4968	0.000143811	0.00318891	-0.0693289	14.2699	6.57714	0.0228853	0.0371879	0	0	TRUE	FALSE	TRUE	FALSE	FALSE	FALSE
chr1	31151472	31151574	103	*	mm10_rmsk	exon	374		B3A	B3A_dup719	B2	SINE	-12975	RP24-421A2.1	ENSMUST00000189666.1	intronic	intronic	gene_body	-1.04928	-1.14562	9.57909	0.0029915	0.0325671	-0.0693289	14.2699	6.57714	0.0228853	0.0371879	0	0	FALSE	FALSE	TRUE	FALSE	FALSE	FALSE
chr1	31168340	31169432	1093	*	mm10_rmsk	exon	7402		L1_Mus2	L1_Mus2_dup432	L1	LINE	3791	RP24-421A2.1	ENSMUST00000189666.1	intronic	intronic	gene_body	1.20606	-1.7859	9.09712	0.00375405	0.0382986	0.484439	13.0175	105.113	8.99763e-08	3.05101e-06	0	0	FALSE	FALSE	FALSE	FALSE	FALSE	FALSE
chr1	31222144	31222323	180	*	mm10_rmsk	exon	833		B3	B3_dup1054	B2	SINE	-274	AC121888.2	ENSMUST00000187892.6	intronic	proximal <=1000bp	Tss_prox_1kbp	-1.41981	0.482026	34.757	1.84802e-07	2.02733e-05	-0.0408682	15.0047	1.97967	0.18188	0.229711	0	0	FALSE	FALSE	FALSE	TRUE	FALSE	TRUE
chr1	31226396	31226969	574	*	mm10_rmsk	exon	343		L2a	L2a_dup181	L2	LINE	3558	Pih1d3	ENSMUST00000027230.2	intergenic	intergenic	intergenic	1.41542	-1.9174	9.22689	0.00353056	0.0366647	-0.0983674	12.4255	17.964	0.000880133	0.00202232	0	0	FALSE	FALSE	FALSE	TRUE	FALSE	FALSE
chr1	31260568	31260995	428	*	mm10_rmsk	exon	2236		RLTR42-int	RLTR42-int_dup24	ERVK	LTR	849	Gm26145	ENSMUST00000104476.1	intergenic	proximal <=1000bp	Tss_prox_1kbp	-1.29931	-0.86263	17.5238	9.44298e-05	0.00228818	-0.0993912	9.24754	16.6974	0.00117789	0.0026152	0	0	TRUE	FALSE	TRUE	FALSE	FALSE	FALSE
chr1	31268145	31270491	2347	*	mm10_rmsk	exon	6551		L1_Mus4	L1_Mus4_dup212	L1	LINE	819	RP24-142M5.2	ENSMUST00000185684.1	intergenic	proximal <=1000bp	Tss_prox_1kbp	1.22239	-1.07747	13.004	0.000634738	0.0102038	0.534569	12.2714	89.1906	2.41524e-07	5.00491e-06	0	0	FALSE	FALSE	FALSE	FALSE	FALSE	FALSE
chr1	31282759	31283573	815	*	mm10_rmsk	exon	4932		L1_Mus4	L1_Mus4_dup213	L1	LINE	-3372	RP24-142M5.1	ENSMUST00000178167.2	intergenic	intergenic	intergenic	1.56138	-1.84199	11.5947	0.00118629	0.0164171	0.534569	12.2714	89.1906	2.41524e-07	5.00491e-06	0	0	FALSE	FALSE	FALSE	FALSE	FALSE	FALSE
chr1	31311619	31314842	3224	*	mm10_rmsk	exon	25183		L1Md_F2	L1Md_F2_dup1015	L1	LINE	24674	RP24-142M5.1	ENSMUST00000178167.2	intergenic	intergenic	intergenic	1.02335	-1.02541	10.3136	0.00212604	0.0253633	0.519061	15.1429	139.838	1.55383e-08	1.93193e-06	0	0	FALSE	FALSE	FALSE	FALSE	FALSE	FALSE
chr1	31323036	31323423	388	*	mm10_rmsk	exon	2345		RLTR28B	RLTR28B_dup4	ERVL	LTR	36091	RP24-142M5.1	ENSMUST00000178167.2	intergenic	intergenic	intergenic	-1.72591	-0.407464	33.6126	2.68623e-07	2.63982e-05	-0.328848	7.25436	38.1215	2.75619e-05	0.000118108	1.50616e-133	4.04267e-133	TRUE	FALSE	TRUE	FALSE	FALSE	FALSE
chr1	31335037	31335240	204	*	mm10_rmsk	exon	1382		MTB	MTB_dup65	ERVL-MaLR	LTR	48092	RP24-142M5.1	ENSMUST00000178167.2	intergenic	intergenic	intergenic	-1.23807	-0.969255	14.0353	0.000405684	0.00720335	0.185179	10.8559	26.8594	0.000152819	0.000465954	0	0	FALSE	FALSE	FALSE	FALSE	FALSE	FALSE
chr1	31335268	31335817	550	*	mm10_rmsk	exon	421		L2	L2_dup192	L2	LINE	48323	RP24-142M5.1	ENSMUST00000178167.2	intergenic	intergenic	intergenic	-1.10355	1.16949	20.3886	3.0225e-05	0.000930375	-0.0530077	12.0044	4.68269	0.0488031	0.0729114	0	0	TRUE	TRUE	TRUE	FALSE	FALSE	TRUE
chr1	31383518	31383869	352	*	mm10_rmsk	exon	2582		L1Md_F2	L1Md_F2_dup1020	L1	LINE	96573	RP24-142M5.1	ENSMUST00000178167.2	intergenic	intergenic	intergenic	-1.1067	-1.1019	8.95429	0.00401725	0.0401764	0.519061	15.1429	139.838	1.55383e-08	1.93193e-06	0	0	FALSE	FALSE	FALSE	FALSE	FALSE	FALSE
chr1	31399490	31400146	657	*	mm10_rmsk	exon	4638		L1_Mus3	L1_Mus3_dup903	L1	LINE	112545	RP24-142M5.1	ENSMUST00000178167.2	intergenic	intergenic	intergenic	1.58978	-1.87111	10.8113	0.00169186	0.0213952	0.491166	14.0232	104.073	9.55672e-08	3.14529e-06	0	0	FALSE	FALSE	FALSE	FALSE	FALSE	FALSE
chr1	31403565	31403938	374	*	mm10_rmsk	exon	1813		RLTR15	RLTR15_dup29	ERVK	LTR	116620	RP24-142M5.1	ENSMUST00000178167.2	intergenic	intergenic	intergenic	1.79864	-2.47908	9.15625	0.00365043	0.0375427	-0.112746	9.48021	9.76387	0.00768804	0.0140113	0	0	FALSE	FALSE	FALSE	FALSE	FALSE	FALSE
chr1	31429336	31430322	987	*	mm10_rmsk	exon	3582		L1Md_A	L1Md_A_dup279	L1	LINE	-129218	RP24-342F15.1	ENSMUST00000189839.1	intergenic	intergenic	intergenic	1.52906	-1.96049	12.2705	0.0008771	0.0130584	0.610953	13.853	112.613	5.9139e-08	3.05101e-06	0	0	FALSE	FALSE	FALSE	FALSE	FALSE	FALSE
chr1	31558779	31559174	396	*	mm10_rmsk	exon	1026		MTD	MTD_dup541	ERVL-MaLR	LTR	-366	RP24-342F15.1	ENSMUST00000189839.1	intergenic	proximal <=1000bp	Tss_prox_1kbp	2.27379	-2.65997	9.52469	0.00306878	0.0331794	-0.128328	13.8494	24.9898	0.000212962	0.000611037	0	0	FALSE	FALSE	FALSE	FALSE	FALSE	FALSE
chr1	31574224	31574696	473	*	mm10_rmsk	exon	3483		L1_Mus1	L1_Mus1_dup545	L1	LINE	14684	RP24-342F15.1	ENSMUST00000189839.1	intergenic	intergenic	intergenic	1.28242	-1.8679	8.91529	0.00409242	0.0407041	0.568501	13.4728	115.916	4.95501e-08	3.05101e-06	0	0	FALSE	FALSE	FALSE	FALSE	FALSE	FALSE
chr1	31584524	31586263	1740	*	mm10_rmsk	exon	15373		L1_Mm	L1_Mm_dup76	L1	LINE	24984	RP24-342F15.1	ENSMUST00000189839.1	intergenic	intergenic	intergenic	1.12171	-1.49147	9.48287	0.00312961	0.0336467	0.52132	10.4216	173.751	3.96979e-09	1.48073e-06	0	0	FALSE	FALSE	FALSE	FALSE	FALSE	FALSE
chr1	31627463	31627616	154	*	mm10_rmsk	exon	1016		B1_Mus2	B1_Mus2_dup506	Alu	SINE	12314	RP24-270O22.1	ENSMUST00000095050.4	intergenic	intergenic	intergenic	-1.25904	-1.26315	11.4904	0.00124328	0.0170092	-0.176162	13.8323	10.0652	0.00699884	0.0128811	0	0	TRUE	TRUE	TRUE	FALSE	FALSE	FALSE
chr1	31711526	31712573	1048	*	mm10_rmsk	exon	7515		L1_Mus1	L1_Mus1_dup548	L1	LINE	-23484	AC134327.1	ENSMUST00000117896.2	intergenic	intergenic	intergenic	1.04098	-1.19023	9.49026	0.00311877	0.0335585	0.568501	13.4728	115.916	4.95501e-08	3.05101e-06	0	0	FALSE	FALSE	FALSE	FALSE	FALSE	FALSE
chr1	31725862	31726393	532	*	mm10_rmsk	exon	2611		Lx2B2	Lx2B2_dup126	L1	LINE	-9664	AC134327.1	ENSMUST00000117896.2	intergenic	intergenic	intergenic	1.1448	-1.70994	8.77755	0.00436995	0.0426499	0.429993	12.0294	66.9103	1.29439e-06	1.24864e-05	0	0	FALSE	FALSE	FALSE	FALSE	FALSE	FALSE
chr1	31750181	31751283	1103	*	mm10_rmsk	exon	4391		Lx5c	Lx5c_dup269	L1	LINE	14124	AC134327.1	ENSMUST00000117896.2	intergenic	intergenic	intergenic	1.09468	-1.43127	8.36438	0.0053273	0.0490016	0.275621	12.3036	49.7246	6.78061e-06	4.22898e-05	0	0	FALSE	FALSE	FALSE	FALSE	FALSE	FALSE
chr1	31771482	31772572	1091	*	mm10_rmsk	exon	7862		MTA_Mm-int	MTA_Mm-int_dup65	ERVL-MaLR	LTR	35425	AC134327.1	ENSMUST00000117896.2	intergenic	intergenic	intergenic	1.3047	-1.32138	15.4318	0.000224084	0.00452115	0.628213	10.4646	101.247	1.37511e-07	3.84688e-06	0	0	FALSE	FALSE	FALSE	FALSE	FALSE	FALSE
chr1	31776374	31776616	243	*	mm10_rmsk	exon	1112		Lx2B	Lx2B_dup79	L1	LINE	40317	AC134327.1	ENSMUST00000117896.2	intergenic	intergenic	intergenic	1.88181	-2.53158	9.99445	0.00246453	0.0282851	0.21701	11.4789	26.956	0.000150288	0.000460745	0	0	FALSE	FALSE	FALSE	FALSE	FALSE	FALSE
chr1	31915886	31916238	353	*	mm10_rmsk	exon	1790		ORR1B1	ORR1B1_dup167	ERVL-MaLR	LTR	179829	AC134327.1	ENSMUST00000117896.2	intergenic	intergenic	intergenic	1.22728	-1.70061	10.1648	0.00227734	0.0266942	-0.0271086	12.3851	0.725931	0.408968	0.463194	0	0	FALSE	FALSE	FALSE	FALSE	FALSE	FALSE
chr1	31959816	31960911	1096	*	mm10_rmsk	exon	9054		MTA_Mm-int	MTA_Mm-int_dup68	ERVL-MaLR	LTR	-211803	Khdrbs2	ENSMUST00000027226.11	intergenic	intergenic	intergenic	1.31884	-1.88798	9.61131	0.00294668	0.0322127	0.628213	10.4646	101.247	1.37511e-07	3.84688e-06	0	0	FALSE	FALSE	FALSE	FALSE	FALSE	FALSE
chr1	31994039	31994607	569	*	mm10_rmsk	exon	3845		Lx3_Mus	Lx3_Mus_dup169	L1	LINE	-178107	Khdrbs2	ENSMUST00000027226.11	intergenic	intergenic	intergenic	1.26634	-1.9593	8.41897	0.00518909	0.0481027	0.490828	12.3525	77.1477	5.68276e-07	7.57815e-06	0	0	FALSE	FALSE	FALSE	FALSE	FALSE	FALSE
chr1	32001350	32002400	1051	*	mm10_rmsk	exon	3669		Lx5c	Lx5c_dup272	L1	LINE	-170314	Khdrbs2	ENSMUST00000027226.11	intergenic	intergenic	intergenic	1.35865	-2.12088	8.39665	0.00524516	0.0484701	0.275621	12.3036	49.7246	6.78061e-06	4.22898e-05	0	0	FALSE	FALSE	FALSE	FALSE	FALSE	FALSE
chr1	32021294	32021781	488	*	mm10_rmsk	exon	2009		Lx7	Lx7_dup629	L1	LINE	-150933	Khdrbs2	ENSMUST00000027226.11	intergenic	intergenic	intergenic	2.33651	-2.2673	18.0852	7.52439e-05	0.00191477	0.295529	13.1367	105.492	8.80305e-08	3.05101e-06	0	0	FALSE	FALSE	FALSE	FALSE	FALSE	FALSE
chr1	32054261	32054590	330	*	mm10_rmsk	exon	557		Lx8b	Lx8b_dup320	L1	LINE	-118124	Khdrbs2	ENSMUST00000027226.11	intergenic	intergenic	intergenic	-1.60881	-2.25773	8.33333	0.00540763	0.0495034	0.344871	12.3091	95.7401	1.58107e-07	3.87825e-06	0	0	FALSE	FALSE	FALSE	FALSE	FALSE	FALSE
chr1	32092458	32092877	420	*	mm10_rmsk	exon	1072		MLTR11B	MLTR11B_dup44	ERVK	LTR	-79837	Khdrbs2	ENSMUST00000027226.11	intergenic	intergenic	intergenic	-1.01747	-0.4501	12.5215	0.000784837	0.0119958	-0.102045	10.1734	11.5685	0.00446739	0.00854532	0	0	TRUE	FALSE	TRUE	FALSE	FALSE	FALSE
chr1	32179852	32180354	503	*	mm10_rmsk	exon	2870		Lx2B2	Lx2B2_dup129	L1	LINE	6965	Khdrbs2	ENSMUST00000185666.1	intronic	intronic	gene_body	1.54123	-1.96284	10.6156	0.0018503	0.0228801	0.429993	12.0294	66.9103	1.29439e-06	1.24864e-05	0	0	FALSE	FALSE	FALSE	FALSE	FALSE	FALSE
chr1	32220594	32220732	139	*	mm10_rmsk	exon	374		ID_B1	ID_B1_dup648	B4	SINE	7355	Gm25814	ENSMUST00000082754.1	intronic	intronic	gene_body	-2.13033	-0.965801	33.9847	2.37738e-07	2.41849e-05	-0.175808	14.6041	23.3246	0.000290382	0.000788684	0	0	TRUE	FALSE	TRUE	FALSE	FALSE	FALSE
chr1	32221162	32221491	330	*	mm10_rmsk	exon	1134		L1_Mus3	L1_Mus3_dup938	L1	LINE	7923	Gm25814	ENSMUST00000082754.1	intronic	intronic	gene_body	-1.147	1.24447	23.3561	9.74887e-06	0.00038434	0.491166	14.0232	104.073	9.55672e-08	3.14529e-06	0	0	TRUE	TRUE	TRUE	FALSE	FALSE	FALSE
chr1	32264892	32266100	1209	*	mm10_rmsk	exon	8126		L1Md_Gf	L1Md_Gf_dup17	L1	LINE	-48915	Khdrbs2	ENSMUST00000186984.1	intronic	intronic	gene_body	1.16336	-1.36257	9.62541	0.00292728	0.0320664	0.50571	9.83266	88.3279	2.55903e-07	5.12027e-06	0	0	FALSE	FALSE	FALSE	FALSE	FALSE	FALSE
chr1	32306324	32306926	603	*	mm10_rmsk	exon	4393		L1Md_F2	L1Md_F2_dup1050	L1	LINE	-8089	Khdrbs2	ENSMUST00000186984.1	intronic	intronic	gene_body	-1.18934	-0.218193	20.4652	2.9337e-05	0.000908714	0.519061	15.1429	139.838	1.55383e-08	1.93193e-06	0	0	TRUE	TRUE	TRUE	FALSE	FALSE	FALSE
chr1	32319456	32320777	1322	*	mm10_rmsk	exon	14353		L1Md_F	L1Md_F_dup82	L1	LINE	4441	Khdrbs2	ENSMUST00000186984.1	intronic	intronic	gene_body	-1.07718	-0.609772	11.57	0.00119952	0.0165573	0.68782	11.2456	113.731	7.70863e-08	3.05101e-06	0	0	TRUE	FALSE	TRUE	FALSE	FALSE	FALSE
chr1	32370517	32370873	357	*	mm10_rmsk	exon	1550		ORR1D1	ORR1D1_dup217	ERVL-MaLR	LTR	55502	Khdrbs2	ENSMUST00000186984.1	intronic	intronic	gene_body	1.88798	-2.49287	9.81215	0.00268272	0.0300886	0.0522614	12.1868	4.48196	0.0532154	0.0784558	0	0	FALSE	FALSE	FALSE	FALSE	FALSE	FALSE
chr1	32403873	32404238	366	*	mm10_rmsk	exon	740		MTEa	MTEa_dup183	ERVL-MaLR	LTR	-69519	RP23-109J14.2	ENSMUST00000195178.1	intronic	intronic	gene_body	-1.22673	-0.152881	19.119	4.97776e-05	0.00137936	-0.2922	12.679	58.9166	2.66017e-06	2.14153e-05	0	0	TRUE	FALSE	TRUE	FALSE	FALSE	FALSE
chr1	32412861	32413069	209	*	mm10_rmsk	exon	579		B3	B3_dup1084	B2	SINE	-60688	RP23-109J14.2	ENSMUST00000195178.1	intronic	intronic	gene_body	-1.31271	-1.22877	14.4428	0.000340673	0.00628324	-0.0408682	15.0047	1.97967	0.18188	0.229711	0	0	TRUE	FALSE	TRUE	FALSE	FALSE	FALSE
chr1	32423800	32425473	1674	*	mm10_rmsk	exon	6921		L1_Mus3	L1_Mus3_dup943	L1	LINE	-48284	RP23-109J14.2	ENSMUST00000195178.1	intronic	intronic	gene_body	1.39195	-0.936286	19.8359	3.7514e-05	0.00110137	0.491166	14.0232	104.073	9.55672e-08	3.14529e-06	0	0	FALSE	FALSE	FALSE	FALSE	FALSE	TRUE
chr1	32465135	32465946	812	*	mm10_rmsk	exon	4201		RMER17D2	RMER17D2_dup56	ERVK	LTR	-7811	RP23-109J14.2	ENSMUST00000195178.1	intronic	intronic	gene_body	1.77387	-1.07931	22.7457	1.22573e-05	0.000458961	0.296254	9.59916	6.55903	0.027266	0.043339	0	0	FALSE	FALSE	FALSE	FALSE	FALSE	FALSE
chr1	32484069	32484479	411	*	mm10_rmsk	exon	1867		Lx6	Lx6_dup301	L1	LINE	-836	RP23-109J14.3	ENSMUST00000192993.1	intronic	proximal <=1000bp	Tss_prox_1kbp	1.76599	-2.44453	9.00362	0.00392423	0.0395202	0.298114	12.3587	77.597	5.49313e-07	7.53997e-06	0	0	FALSE	FALSE	FALSE	FALSE	FALSE	FALSE
chr1	32594296	32594419	124	*	mm10_rmsk	exon	423		RSINE1	RSINE1_dup767	B4	SINE	25875	Gm24732	ENSMUST00000158864.1	intronic	intronic	gene_body	-2.77798	-2.92103	8.85189	0.0042178	0.0415843	0.0578688	14.2698	3.88326	0.0694883	0.0999452	0	0	FALSE	FALSE	FALSE	FALSE	FALSE	FALSE
chr1	32634059	32634632	574	*	mm10_rmsk	exon	2381		Lx5c	Lx5c_dup276	L1	LINE	65638	Gm24732	ENSMUST00000158864.1	intronic	intronic	gene_body	-1.31086	0.490977	30.5512	7.48824e-07	5.54443e-05	0.275621	12.3036	49.7246	6.78061e-06	4.22898e-05	0	0	TRUE	FALSE	TRUE	FALSE	FALSE	FALSE
chr1	32693441	32693644	204	*	mm10_rmsk	exon	264		MIR	MIR_dup256	MIR	SINE	-16535	RP23-28G12.2	ENSMUST00000195241.1	intergenic	intergenic	intergenic	-1.00974	-0.790405	10.7539	0.0017368	0.0218216	-0.0763741	12.8857	8.72251	0.0107557	0.0189413	0	0	TRUE	TRUE	TRUE	FALSE	FALSE	FALSE
chr1	32695422	32696602	1181	*	mm10_rmsk	exon	7019		L1_Mus4	L1_Mus4_dup239	L1	LINE	-13577	RP23-28G12.2	ENSMUST00000195241.1	intergenic	intergenic	intergenic	1.43394	-1.40944	14.4341	0.000341941	0.00630297	0.534569	12.2714	89.1906	2.41524e-07	5.00491e-06	0	0	FALSE	FALSE	FALSE	FALSE	FALSE	FALSE
chr1	32702203	32702524	322	*	mm10_rmsk	exon	2760		RLTRETN_Mm	RLTRETN_Mm_dup39	ERVK	LTR	-7655	RP23-28G12.2	ENSMUST00000195241.1	intergenic	intergenic	intergenic	-1.75748	0.330056	45.5251	6.80945e-09	2.22447e-06	-0.536374	9.3262	60.9698	2.73033e-06	2.18231e-05	0	0	TRUE	FALSE	TRUE	FALSE	FALSE	FALSE
chr1	32731628	32731719	92	*	mm10_rmsk	exon	262		B3	B3_dup1092	B2	SINE	4989	Gm23024	ENSMUST00000158770.1	intergenic	intergenic	intergenic	-1.91675	-2.58739	9.03675	0.00386301	0.0390905	-0.0408682	15.0047	1.97967	0.18188	0.229711	0	0	FALSE	FALSE	FALSE	FALSE	FALSE	FALSE
chr1	32756399	32758995	2597	*	mm10_rmsk	exon	20914		L1Md_T	L1Md_T_dup374	L1	LINE	29760	Gm23024	ENSMUST00000158770.1	intergenic	intergenic	intergenic	1.11173	-1.21262	11.8917	0.00103836	0.0148528	0.582381	14.4509	129.235	2.53579e-08	2.36462e-06	0	0	FALSE	FALSE	FALSE	FALSE	FALSE	FALSE
chr1	32771928	32772719	792	*	mm10_rmsk	exon	2509		RMER1C	RMER1C_dup65	RMER1C	Other	45289	Gm23024	ENSMUST00000158770.1	intergenic	intergenic	intergenic	-1.31552	-0.0013097	23.9402	7.84447e-06	0.000325096	0.152758	10.7003	10.9081	0.0054203	0.0101287	0	0	TRUE	FALSE	TRUE	FALSE	FALSE	FALSE
chr1	32794905	32796076	1172	*	mm10_rmsk	exon	9425		L1_Mus3	L1_Mus3_dup960	L1	LINE	68266	Gm23024	ENSMUST00000158770.1	intergenic	intergenic	intergenic	1.41489	-1.40716	14.9194	0.000278164	0.00535713	0.491166	14.0232	104.073	9.55672e-08	3.14529e-06	0	0	FALSE	FALSE	FALSE	FALSE	FALSE	FALSE
chr1	32942929	32943036	108	*	mm10_rmsk	exon	381		MTE2b	MTE2b_dup147	ERVL-MaLR	LTR	-29454	RP23-144E24.1	ENSMUST00000194631.1	intergenic	intergenic	intergenic	2.5682	-2.83387	10.4022	0.00204101	0.0246025	-0.265936	12.1834	46.9875	9.20397e-06	5.1755e-05	0	0	FALSE	FALSE	FALSE	FALSE	FALSE	FALSE
chr1	32946626	32946712	87	*	mm10_rmsk	exon	336		LTR33	LTR33_dup14	ERVL	LTR	-25778	RP23-144E24.1	ENSMUST00000194631.1	intergenic	intergenic	intergenic	-1.45414	-2.10731	8.92657	0.00407053	0.040553	-0.302497	8.9745	61.8272	2.02822e-06	1.73251e-05	0	0	TRUE	FALSE	TRUE	FALSE	FALSE	FALSE
chr1	32964619	32965007	389	*	mm10_rmsk	exon	898		ORR1D2	ORR1D2_dup146	ERVL-MaLR	LTR	-7483	RP23-144E24.1	ENSMUST00000194631.1	intergenic	intergenic	intergenic	-1.58266	-0.997477	24.1514	7.25452e-06	0.000305736	-0.192417	11.9933	47.1146	9.07148e-06	5.15279e-05	0	0	FALSE	FALSE	FALSE	FALSE	FALSE	TRUE
chr1	33037053	33037922	870	*	mm10_rmsk	exon	6591		RLTR13B3	RLTR13B3_dup5	ERVK	LTR	6763	RP23-75G11.1	ENSMUST00000186430.1	intergenic	intergenic	intergenic	-1.05346	0.140777	17.9885	7.82375e-05	0.00197425	-0.187624	7.76828	13.7058	0.00247915	0.00501657	6.08474e-123	1.5734e-122	FALSE	FALSE	FALSE	FALSE	FALSE	FALSE
chr1	33060050	33060656	607	*	mm10_rmsk	exon	4056		RLTR48A	RLTR48A_dup22	ERV1	LTR	-4474	RP23-75G11.4	ENSMUST00000195240.1	intergenic	intergenic	intergenic	-1.46046	0.163776	33.0318	3.2538e-07	3.02529e-05	-0.248078	8.10161	14.1617	0.00220103	0.00450265	9.98338e-180	3.11636e-179	TRUE	TRUE	TRUE	FALSE	FALSE	FALSE
chr1	33105849	33106556	708	*	mm10_rmsk	exon	3881		RLTR16B_MM	RLTR16B_MM_dup16	ERVK	LTR	-3099	RP23-75G11.3	ENSMUST00000191025.1	intergenic	intergenic	intergenic	-1.50541	0.0519351	31.1508	6.10832e-07	4.76811e-05	-0.937943	9.56878	42.4368	6.0659e-05	0.000213451	0	0	TRUE	FALSE	TRUE	FALSE	FALSE	FALSE
chr1	33117496	33118491	996	*	mm10_rmsk	exon	9024		L1Md_A	L1Md_A_dup300	L1	LINE	7841	RP23-75G11.3	ENSMUST00000191025.1	intergenic	intergenic	intergenic	1.16366	-1.52535	9.8477	0.00263864	0.0297184	0.610953	13.853	112.613	5.9139e-08	3.05101e-06	0	0	FALSE	FALSE	FALSE	FALSE	FALSE	FALSE
chr1	33162536	33163531	996	*	mm10_rmsk	exon	5123		L1Md_F	L1Md_F_dup84	L1	LINE	-28462	Gm24901	ENSMUST00000158125.1	intergenic	intergenic	intergenic	1.07729	-1.52329	8.6356	0.00467671	0.0447277	0.68782	11.2456	113.731	7.70863e-08	3.05101e-06	0	0	FALSE	FALSE	FALSE	FALSE	FALSE	FALSE
chr1	33184453	33185194	742	*	mm10_rmsk	exon	5670		L1Md_F	L1Md_F_dup86	L1	LINE	-6799	Gm24901	ENSMUST00000158125.1	intergenic	intergenic	intergenic	2.13749	-2.60428	10.319	0.00212076	0.025315	0.68782	11.2456	113.731	7.70863e-08	3.05101e-06	0	0	FALSE	FALSE	FALSE	FALSE	FALSE	FALSE
chr1	33185195	33186167	973	*	mm10_rmsk	exon	7601		L1Md_F2	L1Md_F2_dup1086	L1	LINE	-5826	Gm24901	ENSMUST00000158125.1	intergenic	intergenic	intergenic	1.2478	-1.62262	9.67445	0.00286089	0.0315227	0.519061	15.1429	139.838	1.55383e-08	1.93193e-06	0	0	FALSE	FALSE	FALSE	FALSE	FALSE	FALSE
chr1	33189787	33189909	123	*	mm10_rmsk	exon	1136		MTE2a	MTE2a_dup128	ERVL-MaLR	LTR	-2084	Gm24901	ENSMUST00000158125.1	intergenic	intergenic	intergenic	-1.27471	-1.25267	13.1533	0.000594608	0.00969721	-0.169323	12.136	28.5191	0.000115331	0.000368901	0	0	TRUE	FALSE	TRUE	FALSE	FALSE	FALSE
chr1	33257506	33258323	818	*	mm10_rmsk	exon	2921		Lx7	Lx7_dup658	L1	LINE	21567	RP23-154N2.2	ENSMUST00000187673.2	intergenic	intergenic	intergenic	1.34216	-1.80781	10.438	0.00200757	0.0243071	0.295529	13.1367	105.492	8.80305e-08	3.05101e-06	0	0	FALSE	FALSE	FALSE	FALSE	FALSE	FALSE
chr1	33271533	33271840	308	*	mm10_rmsk	exon	1225		MTE2a	MTE2a_dup130	ERVL-MaLR	LTR	-21836	Gm25792	ENSMUST00000083289.1	intergenic	intergenic	intergenic	-1.18062	1.90585	23.4025	9.58112e-06	0.000379279	-0.169323	12.136	28.5191	0.000115331	0.000368901	0	0	TRUE	TRUE	TRUE	FALSE	FALSE	TRUE
chr1	33271842	33272148	307	*	mm10_rmsk	exon	1117		RMER19B2	RMER19B2_dup25	ERVK	LTR	-21528	Gm25792	ENSMUST00000083289.1	intergenic	intergenic	intergenic	-1.16336	2.20049	22.37	1.41254e-05	0.0005122	0.205061	9.3526	53.5721	4.51132e-06	3.09704e-05	0	0	TRUE	TRUE	TRUE	FALSE	FALSE	TRUE
chr1	33276875	33277001	127	*	mm10_rmsk	exon	497		MTD	MTD_dup576	ERVL-MaLR	LTR	-16675	Gm25792	ENSMUST00000083289.1	intergenic	intergenic	intergenic	-2.23691	-2.2775	15.4126	0.000225902	0.00454996	-0.128328	13.8494	24.9898	0.000212962	0.000611037	0	0	FALSE	FALSE	FALSE	FALSE	FALSE	FALSE
chr1	33277002	33277506	505	*	mm10_rmsk	exon	3121		MURVY-LTR	MURVY-LTR_dup1	ERV1	LTR	-16170	Gm25792	ENSMUST00000083289.1	intergenic	intergenic	intergenic	-1.30264	1.52696	28.3274	1.61494e-06	9.74887e-05	-0.128624	9.13775	4.78842	0.0466536	0.0703576	2.06694e-254	8.13811e-254	TRUE	TRUE	TRUE	FALSE	FALSE	FALSE
chr1	33277507	33277546	40	*	mm10_rmsk	exon	497		MTD	MTD_dup577	ERVL-MaLR	LTR	-16130	Gm25792	ENSMUST00000083289.1	intergenic	intergenic	intergenic	-1.47407	-1.39867	14.9987	0.000268977	0.00521981	-0.128328	13.8494	24.9898	0.000212962	0.000611037	0	0	FALSE	FALSE	FALSE	FALSE	FALSE	FALSE
chr1	33277568	33277614	47	*	mm10_rmsk	exon	497		MTD	MTD_dup578	ERVL-MaLR	LTR	-16062	Gm25792	ENSMUST00000083289.1	intergenic	intergenic	intergenic	-1.75539	-1.57223	19.3635	4.51847e-05	0.00127662	-0.128328	13.8494	24.9898	0.000212962	0.000611037	0	0	FALSE	FALSE	FALSE	FALSE	FALSE	FALSE
chr1	33316809	33317653	845	*	mm10_rmsk	exon	13521		L1VL4	L1VL4_dup100	L1	LINE	227	RP23-443F6.1	ENSMUST00000189104.2	intergenic	proximal <=1000bp	Tss_prox_1kbp	1.70039	-2.15482	11.0511	0.00151673	0.0197341	0.46762	11.3684	120.293	3.9467e-08	2.94424e-06	0	0	FALSE	FALSE	FALSE	FALSE	FALSE	FALSE
chr1	33386570	33387575	1006	*	mm10_rmsk	exon	10149		L1_Mur2	L1_Mur2_dup269	L1	LINE	15239	RP23-125B4.2	ENSMUST00000191215.2	intergenic	intergenic	intergenic	1.35178	-1.78765	10.8625	0.00165275	0.0210297	0.419816	12.2317	109.992	6.82796e-08	3.05101e-06	0	0	FALSE	FALSE	FALSE	FALSE	FALSE	FALSE
chr1	33398259	33398487	229	*	mm10_rmsk	exon	266		L2a	L2a_dup191	L2	LINE	-24246	Gm23453	ENSMUST00000083326.1	intergenic	intergenic	intergenic	-1.28838	-1.04519	15.5979	0.000209004	0.00427908	-0.0983674	12.4255	17.964	0.000880133	0.00202232	0	0	TRUE	FALSE	TRUE	FALSE	FALSE	FALSE
chr1	33398699	33399220	522	*	mm10_rmsk	exon	3128		RLTR31B_Mm	RLTR31B_Mm_dup1	ERVK	LTR	-23513	Gm23453	ENSMUST00000083326.1	intergenic	intergenic	intergenic	-1.01474	-0.328754	14.1591	0.000384669	0.00691283	-0.951722	8.4584	61.1403	9.501e-06	5.20085e-05	1.17592e-256	4.67884e-256	TRUE	FALSE	TRUE	FALSE	FALSE	FALSE
chr1	33423013	33423367	355	*	mm10_rmsk	exon	2541		L1_Mus4	L1_Mus4	L1	LINE	280	Gm23453	ENSMUST00000083326.1	intergenic	proximal <=1000bp	Tss_prox_1kbp	1.62378	-2.36811	8.39379	0.00525238	0.0485145	0.534569	12.2714	89.1906	2.41524e-07	5.00491e-06	0	0	FALSE	FALSE	FALSE	FALSE	FALSE	FALSE
chr1	33428848	33435231	6384	*	mm10_rmsk	exon	34363		L1Md_F2	L1Md_F2_dup1095	L1	LINE	6115	Gm23453	ENSMUST00000083326.1	intergenic	intergenic	intergenic	1.12056	0.0627222	21.6875	1.83129e-05	0.000626359	0.519061	15.1429	139.838	1.55383e-08	1.93193e-06	0	0	FALSE	FALSE	FALSE	FALSE	FALSE	FALSE
chr1	33585854	33585970	117	*	mm10_rmsk	exon	343		MLT1I	MLT1I_dup19	ERVL-MaLR	LTR	-30862	RP24-423J19.3	ENSMUST00000192891.1	intronic	intronic	gene_body	-1.25945	-1.17023	11.9881	0.000994588	0.0143728	-0.386999	9.03215	109.011	7.21097e-08	3.05101e-06	0	0	TRUE	TRUE	TRUE	FALSE	FALSE	FALSE
chr1	33621434	33622012	579	*	mm10_rmsk	exon	2675		MLTR31FA_MM	MLTR31FA_MM_dup8	ERVK	LTR	-130	Prim2	ENSMUST00000189552.1	exonic	proximal <=1000bp	Tss_prox_1kbp	-1.42931	2.6911	34.3455	2.1129e-07	2.22679e-05	-0.802573	8.68009	57.8974	9.5744e-06	5.20085e-05	0	0	TRUE	TRUE	TRUE	FALSE	FALSE	FALSE
chr1	33622013	33622256	244	*	mm10_rmsk	exon	770		MTD	MTD_dup589	ERVL-MaLR	LTR	0	Prim2	ENSMUST00000189552.1	exonic	TSS	Tss_prox_1kbp	-1.53515	2.76963	38.8876	4.98131e-08	8.18257e-06	-0.128328	13.8494	24.9898	0.000212962	0.000611037	0	0	TRUE	TRUE	TRUE	FALSE	FALSE	FALSE
chr1	33622257	33622375	119	*	mm10_rmsk	exon	279		MTD-int	MTD-int_dup34	ERVL-MaLR	LTR	115	Prim2	ENSMUST00000189552.1	exonic	proximal <=1000bp	Tss_prox_1kbp	-1.53963	1.43107	40.943	2.65064e-08	5.37886e-06	0.195317	9.51784	44.5378	1.22477e-05	6.25806e-05	0	0	TRUE	TRUE	TRUE	FALSE	FALSE	FALSE
chr1	33622362	33622655	294	*	mm10_rmsk	exon	521		MTD-int	MTD-int_dup35	ERVL-MaLR	LTR	220	Prim2	ENSMUST00000189552.1	exonic	proximal <=1000bp	Tss_prox_1kbp	-1.57283	0.453289	39.6162	3.9768e-08	7.02621e-06	0.195317	9.51784	44.5378	1.22477e-05	6.25806e-05	0	0	TRUE	TRUE	TRUE	FALSE	FALSE	FALSE
chr1	33622708	33622851	144	*	mm10_rmsk	exon	1148		B1_Mm	B1_Mm_dup413	Alu	SINE	-473	Prim2	ENSMUST00000187353.1	exonic	proximal <=1000bp	Tss_prox_1kbp	-1.53704	-1.7432	13.9258	0.000425266	0.0074731	-0.134862	12.9233	6.73414	0.0215837	0.0353101	0	0	FALSE	FALSE	FALSE	FALSE	FALSE	FALSE
chr1	33636451	33636612	162	*	mm10_rmsk	exon	446		B3	B3_dup1122	B2	SINE	13127	Prim2	ENSMUST00000187353.1	intronic	intronic	gene_body	-1.04631	-0.634631	12.7476	0.000710342	0.0111144	-0.0408682	15.0047	1.97967	0.18188	0.229711	0	0	FALSE	FALSE	FALSE	FALSE	FALSE	TRUE
chr1	33652313	33654045	1733	*	mm10_rmsk	exon	7843		L1_Mus1	L1_Mus1_dup577	L1	LINE	-3736	RP24-423J19.6	ENSMUST00000185377.1	intronic	intronic	gene_body	1.0329	-1.28572	8.55544	0.00485983	0.0459565	0.568501	13.4728	115.916	4.95501e-08	3.05101e-06	0	0	FALSE	FALSE	FALSE	FALSE	FALSE	FALSE
chr1	33656848	33657000	153	*	mm10_rmsk	exon	430		B3A	B3A_dup770	B2	SINE	-781	RP24-423J19.6	ENSMUST00000185377.1	intronic	proximal <=1000bp	Tss_prox_1kbp	1.79552	-2.53799	9.26149	0.00347337	0.0362359	-0.0693289	14.2699	6.57714	0.0228853	0.0371879	0	0	FALSE	FALSE	FALSE	FALSE	FALSE	FALSE
chr1	33669947	33670058	112	*	mm10_rmsk	exon	467		PB1D7	PB1D7_dup153	Alu	SINE	104	RP24-423J19.1	ENSMUST00000191965.1	exonic	proximal <=1000bp	Tss_prox_1kbp	-1.22258	1.62444	26.6197	2.95631e-06	0.000153666	-0.319159	12.459	36.3072	3.53263e-05	0.000141179	0	0	TRUE	TRUE	TRUE	TRUE	FALSE	TRUE
chr1	33679902	33680432	531	*	mm10_rmsk	exon	3559		LTRIS2	LTRIS2_dup33	ERV1	LTR	5674	RP24-423J19.7	ENSMUST00000193126.1	intergenic	intergenic	intergenic	-1.19334	-0.351169	17.3195	0.000102616	0.00244344	0.0611396	9.12038	2.90325	0.111145	0.151119	1.88605e-297	8.52493e-297	FALSE	FALSE	FALSE	FALSE	FALSE	FALSE
chr1	33693139	33693629	491	*	mm10_rmsk	exon	2922		RLTR17	RLTR17_dup33	ERVK	LTR	18911	RP24-423J19.7	ENSMUST00000193126.1	intergenic	intergenic	intergenic	-1.06397	-0.627034	14.1392	0.000387972	0.00695833	-1.02879	11.7239	35.9714	0.000128195	0.000404086	0	0	TRUE	FALSE	TRUE	FALSE	FALSE	FALSE
chr1	33694096	33694509	414	*	mm10_rmsk	exon	2410		MTC	MTC_dup334	ERVL-MaLR	LTR	19868	RP24-423J19.7	ENSMUST00000193126.1	intergenic	intergenic	intergenic	-1.11586	-1.0755	9.9521	0.0025135	0.0286895	-0.0712501	12.9646	7.63021	0.0156148	0.0261341	0	0	FALSE	FALSE	TRUE	FALSE	FALSE	FALSE
chr1	33702589	33702958	370	*	mm10_rmsk	exon	779		L1_Rod	L1_Rod_dup191	L1	LINE	-16929	Rab23	ENSMUST00000195006.5	intergenic	intergenic	intergenic	1.82148	-2.36172	11.2631	0.00137773	0.018372	0.3787	10.7586	96.2456	1.53185e-07	3.87825e-06	0	0	FALSE	FALSE	FALSE	FALSE	FALSE	FALSE
chr1	33749242	33749423	182	*	mm10_rmsk	exon	735		B3	B3_dup1133	B2	SINE	523	Bag2	ENSMUST00000155484.1	intronic	proximal <=1000bp	Tss_prox_1kbp	-1.06297	-0.38218	15.2341	0.000243525	0.00482941	-0.0408682	15.0047	1.97967	0.18188	0.229711	0	0	TRUE	TRUE	TRUE	FALSE	FALSE	FALSE
chr1	33764668	33764807	140	*	mm10_rmsk	exon	900		URR1B	URR1B_dup169	hAT-Charlie	DNA	6873	Bag2	ENSMUST00000044691.8	intronic	intronic	gene_body	-2.03372	-2.65238	8.67196	0.00459603	0.0441746	0.0113244	11.7009	0.167068	0.689098	0.720655	0	0	FALSE	FALSE	FALSE	FALSE	FALSE	TRUE
chr1	33787629	33787695	67	*	mm10_rmsk	exon	468		ID4_	ID4__dup199	ID	SINE	3692	Zfp451	ENSMUST00000151055.7	intronic	intronic	gene_body	-1.3503	-2.02939	8.40397	0.00522671	0.0483491	-0.141335	12.0045	20.1414	0.000548502	0.00134679	0	0	FALSE	FALSE	FALSE	FALSE	FALSE	FALSE
chr1	33811467	33811713	247	*	mm10_rmsk	exon	920		B3	B3_dup1139	B2	SINE	-2498	Zfp451	ENSMUST00000130376.2	intronic	intronic	gene_body	1.37404	-2.04239	8.5917	0.00477607	0.0453923	-0.0408682	15.0047	1.97967	0.18188	0.229711	0	0	FALSE	FALSE	FALSE	TRUE	FALSE	FALSE
chr1	33838175	33838251	77	*	mm10_rmsk	exon	181		L3b	L3b_dup19	CR1	LINE	-429	AC163668.5	ENSMUST00000117459.2	exonic	proximal <=1000bp	Tss_prox_1kbp	-1.17897	-0.826226	15.4232	0.000224902	0.004534	-0.233668	8.6964	54.0155	4.31097e-06	3.01499e-05	0	0	FALSE	FALSE	FALSE	FALSE	FALSE	FALSE
chr1	33844903	33845056	154	*	mm10_rmsk	exon	1170		B1_Mus1	B1_Mus1_dup839	Alu	SINE	6223	AC163668.5	ENSMUST00000117459.2	intergenic	intergenic	intergenic	-1.178	1.22291	18.5796	6.17042e-05	0.00163422	-0.146129	14.2108	8.59991	0.011203	0.0196492	0	0	TRUE	TRUE	TRUE	FALSE	FALSE	FALSE
chr1	33845505	33845642	138	*	mm10_rmsk	exon	362		ORR1F	ORR1F_dup246	ERVL-MaLR	LTR	6825	AC163668.5	ENSMUST00000117459.2	intergenic	intergenic	intergenic	-1.03508	0.358225	16.4393	0.000147266	0.00324864	-0.0391757	12.46	2.04136	0.175651	0.223356	0	0	TRUE	FALSE	TRUE	FALSE	TRUE	TRUE
chr1	33857428	33857542	115	*	mm10_rmsk	exon	626		B1_Mur4	B1_Mur4_dup268	Alu	SINE	18748	AC163668.5	ENSMUST00000117459.2	intronic	intronic	gene_body	-1.55944	-1.40857	18.6254	6.05832e-05	0.0016101	-0.197949	13.0761	16.1554	0.00133973	0.00293351	0	0	TRUE	FALSE	TRUE	FALSE	FALSE	FALSE
chr1	33857543	33858492	950	*	mm10_rmsk	exon	8134		L1_Mur1	L1_Mur1_dup107	L1	LINE	18863	AC163668.5	ENSMUST00000117459.2	intronic	intronic	gene_body	-1.12283	-1.12797	11.4383	0.00127285	0.0173033	0.396038	10.8992	82.0644	3.955e-07	6.06253e-06	0	0	TRUE	FALSE	TRUE	FALSE	FALSE	FALSE
chr1	33892658	33892792	135	*	mm10_rmsk	exon	1016		B1_Mus1	B1_Mus1_dup843	Alu	SINE	1541	RP23-32P22.2	ENSMUST00000195730.1	intronic	intronic	gene_body	-1.25741	0.300193	25.8823	3.85411e-06	0.000188213	-0.146129	14.2108	8.59991	0.011203	0.0196492	0	0	FALSE	FALSE	FALSE	FALSE	FALSE	TRUE
chr1	33904264	33904477	214	*	mm10_rmsk	exon	457		B4	B4_dup414	B4	SINE	-3291	Bend6	ENSMUST00000115161.7	intronic	intronic	gene_body	-1.1706	-0.774938	14.1724	0.000382483	0.006882	0.0559679	13.6316	3.88846	0.0693232	0.0998362	0	0	FALSE	FALSE	FALSE	FALSE	TRUE	TRUE
chr1	33934353	33934763	411	*	mm10_rmsk	exon	2334		MTB_Mm	MTB_Mm_dup60	ERVL-MaLR	LTR	11898	RP23-87D8.2	ENSMUST00000193333.1	intronic	intronic	gene_body	1.84201	-2.28246	11.4516	0.00126526	0.0172327	0.0480808	10.5813	2.57299	0.131679	0.173761	0	0	FALSE	FALSE	FALSE	FALSE	FALSE	TRUE
chr1	33938690	33938833	144	*	mm10_rmsk	exon	580		B1F1	B1F1_dup163	Alu	SINE	16235	RP23-87D8.2	ENSMUST00000193333.1	intronic	intronic	gene_body	-1.05177	-0.100345	16.0671	0.000171834	0.00366783	-0.20613	12.0803	22.9816	0.000310097	0.000836142	0	0	TRUE	TRUE	TRUE	FALSE	FALSE	FALSE
chr1	33952958	33953714	757	*	mm10_rmsk	exon	2238		Lx9	Lx9_dup865	L1	LINE	-9971	RP23-87D8.1	ENSMUST00000190740.1	intronic	intronic	gene_body	-1.58591	-1.14926	19.1967	4.82671e-05	0.00134577	0.366266	13.1834	126.776	2.85574e-08	2.45813e-06	0	0	TRUE	FALSE	TRUE	FALSE	FALSE	FALSE
chr1	33959716	33960343	628	*	mm10_rmsk	exon	1373		Lx9	Lx9_dup873	L1	LINE	-3342	RP23-87D8.1	ENSMUST00000190740.1	intronic	intronic	gene_body	-1.12067	0.79427	21.9439	1.66064e-05	0.000580657	0.366266	13.1834	126.776	2.85574e-08	2.45813e-06	0	0	TRUE	TRUE	TRUE	FALSE	FALSE	FALSE
chr1	33973550	33974333	784	*	mm10_rmsk	exon	5805		MusHAL1	MusHAL1_dup67	L1	LINE	-7169	Gm23792	ENSMUST00000122557.1	intronic	intronic	gene_body	-1.57942	-2.0753	10.4406	0.00200522	0.0242858	0.264879	9.88329	46.9413	9.25267e-06	5.17687e-05	0	0	FALSE	FALSE	FALSE	FALSE	FALSE	FALSE
chr1	33981084	33981176	93	*	mm10_rmsk	exon	260		PB1D9	PB1D9_dup180	Alu	SINE	-326	Gm23792	ENSMUST00000122557.1	intronic	proximal <=1000bp	Tss_prox_1kbp	-2.52153	-1.77938	28.0982	1.75013e-06	0.000103541	-0.245535	12.562	18.2067	0.000833525	0.00193109	0	0	TRUE	FALSE	TRUE	FALSE	FALSE	FALSE
chr1	34044667	34044788	122	*	mm10_rmsk	exon	397		PB1D9	PB1D9_dup181	Alu	SINE	12567	RP23-87D8.4	ENSMUST00000194178.1	intronic	intronic	gene_body	-1.07122	-1.27834	8.8477	0.00422621	0.0416479	-0.245535	12.562	18.2067	0.000833525	0.00193109	0	0	TRUE	TRUE	TRUE	FALSE	FALSE	FALSE
chr1	34068448	34068588	141	*	mm10_rmsk	exon	355		ORR1E	ORR1E_dup229	ERVL-MaLR	LTR	-20704	Dst	ENSMUST00000182410.2	intronic	intronic	gene_body	-1.40102	-0.678662	20.786	2.59042e-05	0.000823732	-0.325711	12.9387	82.3757	3.86776e-07	6.01114e-06	0	0	TRUE	TRUE	TRUE	FALSE	FALSE	FALSE
chr1	34098584	34098634	51	*	mm10_rmsk	exon	253		MIR	MIR_dup266	MIR	SINE	9292	Dst	ENSMUST00000182410.2	intronic	intronic	gene_body	3.26282	-2.61862	18.8546	5.52907e-05	0.00149914	-0.0763741	12.8857	8.72251	0.0107557	0.0189413	0	0	FALSE	FALSE	FALSE	FALSE	FALSE	FALSE
chr1	34100365	34100502	138	*	mm10_rmsk	exon	244		MER103C	MER103C_dup3	hAT-Charlie	DNA	11073	Dst	ENSMUST00000182410.2	intronic	intronic	gene_body	-1.87035	-0.469748	35.8204	1.31114e-07	1.59243e-05	-0.17735	7.5474	27.7652	0.000130868	0.000411353	2.14458e-136	5.82542e-136	TRUE	TRUE	TRUE	FALSE	FALSE	FALSE
chr1	34215779	34216072	294	*	mm10_rmsk	exon	576		B4A	B4A_dup757	B4	SINE	-20524	Dst	ENSMUST00000194192.2	intronic	intronic	gene_body	1.58172	-2.23566	8.69213	0.00455193	0.0438741	0.0753296	14.4644	7.74941	0.0149756	0.0252756	0	0	FALSE	FALSE	FALSE	TRUE	FALSE	FALSE
chr1	34280978	34281303	326	*	mm10_rmsk	exon	2060		L1_Mus3	L1_Mus3_dup983	L1	LINE	9850	RP24-422C24.3	ENSMUST00000194920.1	intronic	intronic	gene_body	1.7434	-1.99517	12.7562	0.000707685	0.0110822	0.491166	14.0232	104.073	9.55672e-08	3.14529e-06	0	0	FALSE	TRUE	FALSE	FALSE	FALSE	FALSE
chr1	34316784	34316939	156	*	mm10_rmsk	exon	638		B1_Mur1	B1_Mur1_dup286	Alu	SINE	-13368	RP24-152H15.5	ENSMUST00000193131.1	intergenic	intergenic	intergenic	-1.81263	-0.79686	29.9188	9.29792e-07	6.49167e-05	-0.179663	13.0741	14.4372	0.00205038	0.00424761	0	0	FALSE	FALSE	FALSE	FALSE	FALSE	FALSE
chr1	34317286	34317624	339	*	mm10_rmsk	exon	1816		RLTR30	RLTR30_dup8	ERV1	LTR	-12683	RP24-152H15.5	ENSMUST00000193131.1	intergenic	intergenic	intergenic	-1.45012	-0.722962	20.6228	2.75947e-05	0.000866545	-0.313499	7.16306	37.7416	2.90105e-05	0.00012204	1.28608e-114	3.2439e-114	FALSE	FALSE	FALSE	FALSE	FALSE	FALSE
chr1	34359625	34360762	1138	*	mm10_rmsk	exon	9264		Lx4A	Lx4A_dup119	L1	LINE	-6609	RP24-152H15.2	ENSMUST00000187302.1	intergenic	intergenic	intergenic	1.53255	-1.9255	12.05	0.000967513	0.0140722	0.386963	11.9984	67.5375	1.22707e-06	1.22598e-05	0	0	FALSE	FALSE	FALSE	FALSE	FALSE	FALSE
chr1	34378787	34379363	577	*	mm10_rmsk	exon	3521		Lx2A1	Lx2A1_dup47	L1	LINE	11416	RP24-152H15.2	ENSMUST00000187302.1	intergenic	intergenic	intergenic	-1.06376	0.45894	15.8702	0.000186516	0.00391439	-0.0369648	10.4239	0.553491	0.469563	0.522826	0	0	TRUE	TRUE	TRUE	FALSE	FALSE	FALSE
chr1	34386275	34386460	186	*	mm10_rmsk	exon	1420		B2_Mm2	B2_Mm2_dup686	B2	SINE	18904	RP24-152H15.2	ENSMUST00000187302.1	intergenic	intergenic	intergenic	-1.90119	-2.3039	10.7788	0.00171715	0.021636	0.10167	14.026	5.41603	0.0359684	0.0559787	0	0	FALSE	FALSE	FALSE	FALSE	FALSE	FALSE
chr1	34386467	34386916	450	*	mm10_rmsk	exon	2051		RLTR20C	RLTR20C_dup10	ERVK	LTR	19096	RP24-152H15.2	ENSMUST00000187302.1	intergenic	intergenic	intergenic	-1.44568	0.577319	31.8048	4.89931e-07	4.05933e-05	-0.464	6.35082	53.6486	4.47601e-06	3.09176e-05	7.58864e-62	1.46334e-61	TRUE	TRUE	TRUE	FALSE	FALSE	FALSE
chr1	34394844	34394934	91	*	mm10_rmsk	exon	251		PB1	PB1_dup101	Alu	SINE	-20944	RP24-152H15.3	ENSMUST00000186409.1	intergenic	intergenic	intergenic	-1.29145	-0.909725	16.3734	0.000151338	0.00331931	-0.205657	11.1561	26.6413	0.000158719	0.000477294	0	0	FALSE	FALSE	FALSE	FALSE	FALSE	FALSE
chr1	34395210	34395582	373	*	mm10_rmsk	exon	2193		RLTR14	RLTR14_dup35	ERV1	LTR	-20296	RP24-152H15.3	ENSMUST00000186409.1	intergenic	intergenic	intergenic	-1.52978	-1.18606	18.3721	6.70488e-05	0.00174742	0.0133794	9.19462	0.221146	0.645625	0.686092	7.29648e-300	3.32461e-299	FALSE	FALSE	FALSE	FALSE	FALSE	FALSE
chr1	34429108	34431409	2302	*	mm10_rmsk	exon	3939		RLTR4_MM-int	RLTR4_MM-int_dup11	ERV1	LTR	-1790	Mir5103	ENSMUST00000175111.1	exonic	exonic	gene_body	1.14207	-0.422086	17.7331	8.67436e-05	0.00214155	0.68142	8.61931	41.7504	4.38065e-05	0.000162855	2.82778e-177	8.73058e-177	FALSE	FALSE	FALSE	FALSE	FALSE	FALSE
chr1	34434116	34434219	104	*	mm10_rmsk	exon	299		PB1D10	PB1D10_dup478	Alu	SINE	852	RP24-554B1.11	ENSMUST00000192173.1	intergenic	proximal <=1000bp	Tss_prox_1kbp	-1.08831	0.0370502	18.2396	7.07118e-05	0.0018222	-0.196601	13.5951	25.3633	0.00019904	0.000578507	0	0	FALSE	FALSE	FALSE	FALSE	TRUE	TRUE
chr1	34440425	34440572	148	*	mm10_rmsk	exon	854		B1_Mur4	B1_Mur4_dup282	Alu	SINE	384	Imp4	ENSMUST00000136770.2	exonic	proximal <=1000bp	Tss_prox_1kbp	-1.56077	-1.07279	19.1242	4.96735e-05	0.00137753	-0.197949	13.0761	16.1554	0.00133973	0.00293351	0	0	FALSE	FALSE	FALSE	TRUE	FALSE	TRUE
chr1	34450475	34450927	453	*	mm10_rmsk	exon	3114		MERV1_LTR	MERV1_LTR_dup11	ERV1	LTR	2228	Imp4	ENSMUST00000191000.1	intergenic	intergenic	intergenic	-1.17914	-0.519285	14.8146	0.000290797	0.00554793	0.327008	7.2186	22.2039	0.000382746	0.000990399	2.40985e-103	5.75714e-103	TRUE	FALSE	TRUE	FALSE	FALSE	TRUE
chr1	34450928	34450958	31	*	mm10_rmsk	exon	253		MTE2b	MTE2b_dup154	ERVL-MaLR	LTR	2681	Imp4	ENSMUST00000191000.1	intergenic	intergenic	intergenic	-1.18118	-0.806235	12.58	0.000764814	0.0117596	-0.265936	12.1834	46.9875	9.20397e-06	5.1755e-05	0	0	TRUE	FALSE	TRUE	FALSE	FALSE	TRUE
chr1	34450975	34451162	188	*	mm10_rmsk	exon	594		MTE2b	MTE2b_dup155	ERVL-MaLR	LTR	2728	Imp4	ENSMUST00000191000.1	intergenic	intergenic	intergenic	-1.11871	0.898949	19.1806	4.85763e-05	0.00135256	-0.265936	12.1834	46.9875	9.20397e-06	5.1755e-05	0	0	TRUE	TRUE	TRUE	FALSE	FALSE	TRUE
chr1	34451165	34451278	114	*	mm10_rmsk	exon	298		MTE2b-int	MTE2b-int_dup18	ERVL-MaLR	LTR	2918	Imp4	ENSMUST00000191000.1	intergenic	intergenic	intergenic	-1.23934	0.780929	24.4365	6.53022e-06	0.000281737	0.189526	7.67328	37.571	2.96892e-05	0.000124428	6.98733e-115	1.76637e-114	TRUE	TRUE	TRUE	FALSE	FALSE	FALSE
chr1	34451299	34451636	338	*	mm10_rmsk	exon	1890		MTE2b-int	MTE2b-int_dup19	ERVL-MaLR	LTR	3052	Imp4	ENSMUST00000191000.1	intergenic	intergenic	intergenic	-1.08447	0.692937	19.5181	4.25089e-05	0.00121654	0.189526	7.67328	37.571	2.96892e-05	0.000124428	6.98733e-115	1.76637e-114	TRUE	TRUE	TRUE	FALSE	FALSE	FALSE
chr1	34451637	34451783	147	*	mm10_rmsk	exon	1219		B1_Mus1	B1_Mus1_dup870	Alu	SINE	3390	Imp4	ENSMUST00000191000.1	intergenic	intergenic	intergenic	-1.35799	-1.46276	12.9021	0.00066372	0.0105559	-0.146129	14.2108	8.59991	0.011203	0.0196492	0	0	TRUE	FALSE	TRUE	FALSE	FALSE	FALSE
chr1	34458412	34458559	148	*	mm10_rmsk	exon	1144		B1_Mus1	B1_Mus1_dup871	Alu	SINE	-1203	Ptpn18	ENSMUST00000185610.1	intergenic	intergenic	intergenic	-1.01987	-0.252663	11.5659	0.00120176	0.016581	-0.146129	14.2108	8.59991	0.011203	0.0196492	0	0	TRUE	TRUE	TRUE	FALSE	FALSE	FALSE
chr1	34458744	34458904	161	*	mm10_rmsk	exon	628		RSINE1	RSINE1_dup832	B4	SINE	-858	Ptpn18	ENSMUST00000185610.1	intergenic	proximal <=1000bp	Tss_prox_1kbp	-1.16086	-0.476105	14.5654	0.000323313	0.00603235	0.0578688	14.2698	3.88326	0.0694883	0.0999452	0	0	FALSE	FALSE	FALSE	FALSE	FALSE	FALSE
chr1	34479827	34480099	273	*	mm10_rmsk	exon	1144		MTEa	MTEa_dup192	ERVL-MaLR	LTR	5328	Ptpn18	ENSMUST00000188019.1	intronic	intronic	gene_body	-1.3394	0.520632	30.8249	6.82228e-07	5.17487e-05	-0.2922	12.679	58.9166	2.66017e-06	2.14153e-05	0	0	TRUE	TRUE	TRUE	FALSE	TRUE	FALSE
chr1	34480157	34480273	117	*	mm10_rmsk	exon	257		PB1D10	PB1D10_dup480	Alu	SINE	-5338	RP24-554B1.5	ENSMUST00000188292.6	exonic	exonic	gene_body	-1.9421	-1.86673	18.271	6.98251e-05	0.00180406	-0.196601	13.5951	25.3633	0.00019904	0.000578507	0	0	FALSE	FALSE	FALSE	FALSE	TRUE	FALSE
chr1	34483912	34483971	60	*	mm10_rmsk	exon	259		B3	B3_dup1176	B2	SINE	-1640	RP24-554B1.5	ENSMUST00000188292.6	intronic	intronic	gene_body	-1.44291	-0.435289	21.1174	2.27922e-05	0.000744812	-0.0408682	15.0047	1.97967	0.18188	0.229711	0	0	TRUE	TRUE	TRUE	FALSE	FALSE	FALSE
chr1	34483995	34484094	100	*	mm10_rmsk	exon	407		B1F1	B1F1_dup168	Alu	SINE	-1517	RP24-554B1.5	ENSMUST00000188292.6	intronic	intronic	gene_body	-1.45395	-1.01208	16.3581	0.000152296	0.00333605	-0.20613	12.0803	22.9816	0.000310097	0.000836142	0	0	TRUE	FALSE	TRUE	FALSE	FALSE	FALSE
chr1	34516111	34516252	142	*	mm10_rmsk	exon	627		B3A	B3A_dup797	B2	SINE	-7755	RP24-554B1.9	ENSMUST00000188334.1	intergenic	intergenic	intergenic	-1.81459	-1.14738	23.2577	1.01142e-05	0.000395335	-0.0693289	14.2699	6.57714	0.0228853	0.0371879	0	0	TRUE	FALSE	TRUE	FALSE	FALSE	FALSE
chr1	34516285	34516318	34	*	mm10_rmsk	exon	524		B3	B3_dup1180	B2	SINE	-7689	RP24-554B1.9	ENSMUST00000188334.1	intergenic	intergenic	intergenic	-2.05351	-2.01409	17.9169	8.05297e-05	0.00202066	-0.0408682	15.0047	1.97967	0.18188	0.229711	0	0	FALSE	FALSE	FALSE	FALSE	FALSE	FALSE
chr1	34516486	34516567	82	*	mm10_rmsk	exon	287		ID4_	ID4__dup209	ID	SINE	-7440	RP24-554B1.9	ENSMUST00000188334.1	intergenic	intergenic	intergenic	-1.69753	-0.559457	32.5959	3.7605e-07	3.35229e-05	-0.141335	12.0045	20.1414	0.000548502	0.00134679	0	0	FALSE	FALSE	FALSE	FALSE	FALSE	FALSE
chr1	34516711	34517192	482	*	mm10_rmsk	exon	1867		RMER4B	RMER4B_dup47	ERVK	LTR	-6815	RP24-554B1.9	ENSMUST00000188334.1	intergenic	intergenic	intergenic	-1.5619	2.82737	36.6124	1.01805e-07	1.33556e-05	-0.0488324	10.4274	1.90913	0.189351	0.238339	0	0	TRUE	TRUE	TRUE	FALSE	FALSE	TRUE
chr1	34560411	34560556	146	*	mm10_rmsk	exon	1243		B1_Mm	B1_Mm_dup444	Alu	SINE	-364	Prss40	ENSMUST00000047840.8	intronic	proximal <=1000bp	Tss_prox_1kbp	-1.38998	-0.65495	23.1409	1.05661e-05	0.000409177	-0.134862	12.9233	6.73414	0.0215837	0.0353101	0	0	TRUE	FALSE	FALSE	TRUE	FALSE	FALSE
chr1	34561210	34561288	79	*	mm10_rmsk	exon	360		B3A	B3A_dup801	B2	SINE	267	Prss40	ENSMUST00000115071.3	intergenic	proximal <=1000bp	Tss_prox_1kbp	-1.43537	-1.35602	14.5806	0.000321232	0.00600304	-0.0693289	14.2699	6.57714	0.0228853	0.0371879	0	0	FALSE	FALSE	FALSE	FALSE	FALSE	TRUE
chr1	34561463	34561664	202	*	mm10_rmsk	exon	738		Lx8	Lx8_dup655	L1	LINE	520	Prss40	ENSMUST00000115071.3	intergenic	proximal <=1000bp	Tss_prox_1kbp	-1.23247	-1.55433	9.19778	0.00357945	0.0370227	0.121817	13.7403	15.9377	0.00141182	0.00306763	0	0	FALSE	FALSE	TRUE	FALSE	FALSE	FALSE
chr1	34593533	34593827	295	*	mm10_rmsk	exon	1739		ORR1C2	ORR1C2_dup120	ERVL-MaLR	LTR	13822	RP24-70I14.1	ENSMUST00000186712.1	intergenic	intergenic	intergenic	-1.26735	-0.835663	16.5633	0.000139919	0.00312039	0.0855834	11.3203	11.3945	0.0046982	0.00891066	0	0	TRUE	FALSE	TRUE	FALSE	FALSE	FALSE
chr1	34593868	34593946	79	*	mm10_rmsk	exon	291		RSINE1	RSINE1_dup840	B4	SINE	-13773	RP24-70I14.3	ENSMUST00000186179.1	intergenic	intergenic	intergenic	-1.81588	0.429072	45.5467	6.76688e-09	2.2174e-06	0.0578688	14.2698	3.88326	0.0694883	0.0999452	0	0	TRUE	TRUE	TRUE	FALSE	FALSE	FALSE
chr1	34594329	34594458	130	*	mm10_rmsk	exon	629		B1_Mus2	B1_Mus2_dup571	Alu	SINE	-13261	RP24-70I14.3	ENSMUST00000186179.1	intergenic	intergenic	intergenic	-1.84086	-1.86071	16.5187	0.000142517	0.00316691	-0.176162	13.8323	10.0652	0.00699884	0.0128811	0	0	FALSE	FALSE	FALSE	FALSE	FALSE	FALSE
chr1	34599562	34599949	388	*	mm10_rmsk	exon	1033		MTD	MTD_dup617	ERVL-MaLR	LTR	-7770	RP24-70I14.3	ENSMUST00000186179.1	intergenic	intergenic	intergenic	-1.31885	-0.0714956	24.6058	6.13608e-06	0.000268615	-0.128328	13.8494	24.9898	0.000212962	0.000611037	0	0	TRUE	TRUE	TRUE	FALSE	FALSE	FALSE
chr1	34600013	34600266	254	*	mm10_rmsk	exon	1318		RLTR27	RLTR27_dup29	ERVK	LTR	-7453	RP24-70I14.3	ENSMUST00000186179.1	intergenic	intergenic	intergenic	-1.76534	0.0839471	45.3251	7.21608e-09	2.31275e-06	-0.799988	10.5008	19.9396	0.00118207	0.00261929	0	0	TRUE	FALSE	TRUE	FALSE	FALSE	FALSE
chr1	34633238	34633568	331	*	mm10_rmsk	exon	1437		RLTR28	RLTR28_dup37	ERVL	LTR	-2621	RP24-70I14.4	ENSMUST00000195095.1	intergenic	intergenic	intergenic	-1.55752	-1.75592	13.0646	0.000618096	0.00999751	-0.0654509	9.46081	5.67991	0.0323543	0.0506356	0	0	FALSE	FALSE	FALSE	FALSE	TRUE	FALSE
chr1	34661638	34661976	339	*	mm10_rmsk	exon	1110		ORR1E	ORR1E_dup232	ERVL-MaLR	LTR	-16212	Arhgef4	ENSMUST00000159747.8	intergenic	intergenic	intergenic	2.56079	-2.56768	14.4232	0.000343547	0.00632588	-0.325711	12.9387	82.3757	3.86776e-07	6.01114e-06	0	0	FALSE	FALSE	FALSE	FALSE	FALSE	FALSE
chr1	34667031	34667396	366	*	mm10_rmsk	exon	1525		MTE2b	MTE2b_dup159	ERVL-MaLR	LTR	-10792	Arhgef4	ENSMUST00000159747.8	intergenic	intergenic	intergenic	-1.13043	-1.21297	10.8701	0.00164701	0.0209733	-0.265936	12.1834	46.9875	9.20397e-06	5.1755e-05	0	0	FALSE	FALSE	FALSE	FALSE	FALSE	FALSE
chr1	34677221	34677529	309	*	mm10_rmsk	exon	533		B4A	B4A_dup779	B4	SINE	-659	Arhgef4	ENSMUST00000159747.8	intergenic	proximal <=1000bp	Tss_prox_1kbp	-1.25664	-0.201672	21.7378	1.79646e-05	0.00061737	0.0753296	14.4644	7.74941	0.0149756	0.0252756	0	0	TRUE	FALSE	TRUE	FALSE	TRUE	TRUE
chr1	34682393	34682624	232	*	mm10_rmsk	exon	746		B4A	B4A_dup780	B4	SINE	4205	Arhgef4	ENSMUST00000159747.8	intronic	intronic	gene_body	1.81584	-2.41949	9.28463	0.00343565	0.0359495	0.0753296	14.4644	7.74941	0.0149756	0.0252756	0	0	FALSE	FALSE	FALSE	FALSE	FALSE	FALSE
chr1	34685734	34686259	526	*	mm10_rmsk	exon	379		L1MB8	L1MB8_dup72	L1	LINE	7546	Arhgef4	ENSMUST00000159747.8	intronic	intronic	gene_body	-1.13677	-0.172472	20.5901	2.79478e-05	0.000875105	-0.0202412	10.2997	0.347894	0.564985	0.614305	0	0	TRUE	FALSE	TRUE	FALSE	FALSE	FALSE
chr1	34689309	34689673	365	*	mm10_rmsk	exon	2205		ORR1C2	ORR1C2_dup124	ERVL-MaLR	LTR	11121	Arhgef4	ENSMUST00000159747.8	intronic	intronic	gene_body	2.22507	-2.2867	16.4085	0.000149152	0.00328114	0.0855834	11.3203	11.3945	0.0046982	0.00891066	0	0	FALSE	FALSE	FALSE	FALSE	FALSE	FALSE
chr1	34694423	34694900	478	*	mm10_rmsk	exon	1742		MT2A	MT2A_dup106	ERVL	LTR	16235	Arhgef4	ENSMUST00000159747.8	intronic	intronic	gene_body	1.97309	-2.4515	11.3111	0.00134813	0.0180682	0.0807366	11.1268	8.80359	0.0104713	0.018511	0	0	FALSE	FALSE	FALSE	FALSE	FALSE	FALSE
chr1	34707714	34708583	870	*	mm10_rmsk	exon	4627		RLTR17D_Mm	RLTR17D_Mm_dup17	ERVK	LTR	-23532	Arhgef4	ENSMUST00000162599.7	intronic	intronic	gene_body	1.77082	-2.00974	13.4274	0.000527664	0.00883534	0.422858	7.98403	93.4817	1.82437e-07	4.08293e-06	1.53587e-100	3.60817e-100	FALSE	FALSE	FALSE	FALSE	FALSE	FALSE
chr1	34712001	34712163	163	*	mm10_rmsk	exon	405		L1MDa	L1MDa_dup47	L1	LINE	-19952	Arhgef4	ENSMUST00000162599.7	intronic	intronic	gene_body	-1.81641	-0.535204	41.8405	2.02093e-08	4.4793e-06	-0.0968633	9.30415	9.61972	0.00804533	0.0145413	0	0	TRUE	FALSE	TRUE	FALSE	FALSE	FALSE
chr1	34726797	34727019	223	*	mm10_rmsk	exon	477		L1MD2	L1MD2_dup33	L1	LINE	-5096	Arhgef4	ENSMUST00000162599.7	intronic	intronic	gene_body	-1.71383	-2.24375	9.7464	0.00276629	0.0307642	0.13475	9.16293	21.9494	0.00037939	0.000985005	7.50726e-291	3.31375e-290	FALSE	FALSE	FALSE	FALSE	FALSE	FALSE
chr1	34738274	34738378	105	*	mm10_rmsk	exon	249		Tigger17b	Tigger17b_dup2	TcMar-Tigger	DNA	6159	Arhgef4	ENSMUST00000162599.7	intronic	intronic	gene_body	-1.39129	-1.5186	11.4244	0.00128085	0.0173858	-0.0980891	3.776	1.75271	0.207373	0.257547	6.39117e-18	8.44681e-18	FALSE	FALSE	FALSE	FALSE	FALSE	FALSE
chr1	34769709	34769978	270	*	mm10_rmsk	exon	668		B4A	B4A_dup797	B4	SINE	16586	RP23-348C6.5	ENSMUST00000194977.1	intronic	intronic	gene_body	2.58011	-2.4911	14.2994	0.000362216	0.0065913	0.0753296	14.4644	7.74941	0.0149756	0.0252756	0	0	FALSE	FALSE	FALSE	FALSE	FALSE	FALSE
chr1	34774138	34775250	1113	*	mm10_rmsk	exon	5941		Lx9	Lx9_dup878	L1	LINE	21015	RP23-348C6.5	ENSMUST00000194977.1	intronic	intronic	gene_body	1.17949	-1.67154	8.81959	0.00428321	0.0420417	0.366266	13.1834	126.776	2.85574e-08	2.45813e-06	0	0	FALSE	FALSE	FALSE	FALSE	FALSE	FALSE
chr1	34776991	34777327	337	*	mm10_rmsk	exon	679		ORR1F	ORR1F_dup256	ERVL-MaLR	LTR	23868	RP23-348C6.5	ENSMUST00000194977.1	intronic	intronic	gene_body	-1.28968	-0.793531	16.0285	0.000174618	0.00371484	-0.0391757	12.46	2.04136	0.175651	0.223356	0	0	TRUE	FALSE	TRUE	FALSE	FALSE	FALSE
chr1	34777328	34777532	205	*	mm10_rmsk	exon	738		L1MEg	L1MEg_dup22	L1	LINE	-24172	Arhgef4	ENSMUST00000047664.15	intronic	intronic	gene_body	-1.32082	-0.776729	15.9533	0.00018017	0.00380621	0.0444579	8.9257	1.09866	0.312842	0.3658	4.70917e-270	1.9782e-269	TRUE	FALSE	TRUE	FALSE	FALSE	FALSE
chr1	34779662	34780189	528	*	mm10_rmsk	exon	1920		RMER5	RMER5_dup78	ERV1	LTR	-21515	Arhgef4	ENSMUST00000047664.15	intronic	intronic	gene_body	-1.05631	1.88212	17.6222	9.07309e-05	0.00221897	-0.0928129	11.0315	12.5981	0.0033416	0.00657162	0	0	TRUE	TRUE	TRUE	FALSE	FALSE	FALSE
chr1	34787185	34787344	160	*	mm10_rmsk	exon	687		ID_B1	ID_B1_dup713	B4	SINE	-14360	Arhgef4	ENSMUST00000047664.15	intronic	intronic	gene_body	-1.70565	-0.991987	26.6825	2.89069e-06	0.000151125	-0.175808	14.6041	23.3246	0.000290382	0.000788684	0	0	TRUE	TRUE	TRUE	FALSE	FALSE	FALSE
chr1	34801202	34801343	142	*	mm10_rmsk	exon	489		ID_B1	ID_B1_dup714	B4	SINE	-361	Arhgef4	ENSMUST00000047664.15	intronic	proximal <=1000bp	Tss_prox_1kbp	-1.05977	-0.968626	10.4696	0.00197866	0.0240513	-0.175808	14.6041	23.3246	0.000290382	0.000788684	0	0	FALSE	FALSE	FALSE	FALSE	FALSE	TRUE
chr1	34843508	34843675	168	*	mm10_rmsk	exon	538		B3	B3_dup1192	B2	SINE	443	Fam168b	ENSMUST00000047534.11	intergenic	proximal <=1000bp	Tss_prox_1kbp	-1.64475	0.221314	39.8096	3.74716e-08	6.75563e-06	-0.0408682	15.0047	1.97967	0.18188	0.229711	0	0	TRUE	FALSE	TRUE	TRUE	FALSE	TRUE
chr1	34843666	34843785	120	*	mm10_rmsk	exon	611		B1_Mus1	B1_Mus1_dup882	Alu	SINE	601	Fam168b	ENSMUST00000047534.11	intergenic	proximal <=1000bp	Tss_prox_1kbp	-1.87398	-1.04786	26.4435	3.14897e-06	0.000161115	-0.146129	14.2108	8.59991	0.011203	0.0196492	0	0	FALSE	FALSE	FALSE	TRUE	FALSE	TRUE
chr1	34855094	34855142	49	*	mm10_rmsk	exon	819		MTD	MTD_dup630	ERVL-MaLR	LTR	3257	Plekhb2	ENSMUST00000152654.2	intronic	intronic	gene_body	-2.31142	-2.12258	18.155	7.31605e-05	0.00187253	-0.128328	13.8494	24.9898	0.000212962	0.000611037	0	0	FALSE	FALSE	FALSE	FALSE	FALSE	FALSE
chr1	34855145	34855377	233	*	mm10_rmsk	exon	527		MTD-int	MTD-int_dup44	ERVL-MaLR	LTR	3308	Plekhb2	ENSMUST00000152654.2	intronic	intronic	gene_body	-1.06539	-1.28243	9.74789	0.00276438	0.030748	0.195317	9.51784	44.5378	1.22477e-05	6.25806e-05	0	0	FALSE	FALSE	FALSE	FALSE	FALSE	FALSE
chr1	34866436	34866647	212	*	mm10_rmsk	exon	535		ID_B1	ID_B1_dup719	B4	SINE	-11009	Plekhb2	ENSMUST00000191722.1	intronic	intronic	gene_body	2.38633	-2.40128	15.4657	0.000220919	0.00447085	-0.175808	14.6041	23.3246	0.000290382	0.000788684	0	0	FALSE	FALSE	FALSE	FALSE	FALSE	FALSE
chr1	34867271	34867420	150	*	mm10_rmsk	exon	723		B3	B3_dup1197	B2	SINE	-10236	Plekhb2	ENSMUST00000191722.1	intronic	intronic	gene_body	-1.39696	-0.450851	23.462	9.37096e-06	0.000372626	-0.0408682	15.0047	1.97967	0.18188	0.229711	0	0	TRUE	TRUE	TRUE	FALSE	FALSE	FALSE
chr1	34872051	34872432	382	*	mm10_rmsk	exon	1439		ORR1D2	ORR1D2_dup157	ERVL-MaLR	LTR	-5224	Plekhb2	ENSMUST00000191722.1	exonic	exonic	gene_body	-1.449	-1.27164	14.5048	0.000331784	0.00615259	-0.192417	11.9933	47.1146	9.07148e-06	5.15279e-05	0	0	FALSE	FALSE	FALSE	FALSE	FALSE	FALSE
chr1	34874466	34874598	133	*	mm10_rmsk	exon	421		B1_Mur1	B1_Mur1_dup296	Alu	SINE	-3058	Plekhb2	ENSMUST00000191722.1	intronic	intronic	gene_body	-1.55361	-0.622596	24.8549	5.60037e-06	0.000250219	-0.179663	13.0741	14.4372	0.00205038	0.00424761	0	0	TRUE	TRUE	TRUE	FALSE	FALSE	FALSE
chr1	34930732	34930839	108	*	mm10_rmsk	exon	283		RLTR31M	RLTR31M_dup2	ERVK	LTR	2223	RP23-348C6.4	ENSMUST00000193847.1	intergenic	intergenic	intergenic	-1.48887	2.85545	35.7684	1.3332e-07	1.60999e-05	-0.503417	7.21151	62.3323	1.93707e-06	1.69343e-05	1.73294e-121	4.45051e-121	TRUE	TRUE	TRUE	FALSE	FALSE	FALSE
chr1	34930810	34930875	66	*	mm10_rmsk	exon	298		RLTR31M	RLTR31M_dup3	ERVK	LTR	2301	RP23-348C6.4	ENSMUST00000193847.1	intergenic	intergenic	intergenic	-1.40838	1.9784	32.7908	3.5246e-07	3.19988e-05	-0.503417	7.21151	62.3323	1.93707e-06	1.69343e-05	1.73294e-121	4.45051e-121	TRUE	TRUE	TRUE	FALSE	FALSE	FALSE
chr1	34960846	34961389	544	*	mm10_rmsk	exon	233		RMER17C2	RMER17C2_dup40	ERVK	LTR	-8466	RP23-348C6.6	ENSMUST00000193622.1	intergenic	intergenic	intergenic	-1.21682	1.03717	23.5186	9.17529e-06	0.000367111	-0.14218	9.92057	6.57569	0.0228977	0.0371879	0	0	TRUE	TRUE	TRUE	FALSE	FALSE	FALSE
chr1	34961599	34961891	293	*	mm10_rmsk	exon	1165		ORR1E	ORR1E_dup236	ERVL-MaLR	LTR	-7964	RP23-348C6.6	ENSMUST00000193622.1	intergenic	intergenic	intergenic	-1.4818	1.22143	34.5892	1.95162e-07	2.10442e-05	-0.325711	12.9387	82.3757	3.86776e-07	6.01114e-06	0	0	TRUE	TRUE	TRUE	FALSE	FALSE	FALSE
chr1	34961967	34962046	80	*	mm10_rmsk	exon	241		L1MA7	L1MA7_dup50	L1	LINE	-7809	RP23-348C6.6	ENSMUST00000193622.1	intergenic	intergenic	intergenic	-2.74575	-0.551349	71.5086	8.34599e-12	5.84706e-08	0.282113	8.9158	55.6207	3.66648e-06	2.66415e-05	2.24745e-247	8.75732e-247	TRUE	FALSE	TRUE	FALSE	FALSE	TRUE
chr1	34984735	34985380	646	*	mm10_rmsk	exon	960		RMER15-int	RMER15-int_dup41	ERVL	LTR	-276	RP23-309D5.1	ENSMUST00000192315.1	intergenic	proximal <=1000bp	Tss_prox_1kbp	1.46664	-2.07318	9.15833	0.00364685	0.0375183	0.131834	9.91364	24.1559	0.00024829	0.000691135	0	0	FALSE	FALSE	FALSE	FALSE	FALSE	FALSE
chr1	35006802	35012057	5256	*	mm10_rmsk	exon	35369		L1Md_F2	L1Md_F2_dup1111	L1	LINE	21146	RP23-309D5.1	ENSMUST00000192315.1	intergenic	intergenic	intergenic	1.09398	-0.442404	13.3762	0.000539538	0.00898954	0.519061	15.1429	139.838	1.55383e-08	1.93193e-06	0	0	FALSE	FALSE	FALSE	FALSE	FALSE	FALSE
chr1	35035841	35036056	216	*	mm10_rmsk	exon	1205		ORR1B1	ORR1B1_dup194	ERVL-MaLR	LTR	50185	RP23-309D5.1	ENSMUST00000192315.1	intergenic	intergenic	intergenic	-2.63913	-2.27702	19.5467	4.20328e-05	0.00120535	-0.0271086	12.3851	0.725931	0.408968	0.463194	0	0	FALSE	FALSE	TRUE	FALSE	FALSE	FALSE
chr1	35066901	35068402	1502	*	mm10_rmsk	exon	7771		L1_Mus1	L1_Mus1_dup585	L1	LINE	81245	RP23-309D5.1	ENSMUST00000192315.1	intergenic	intergenic	intergenic	1.27437	-1.69201	9.49728	0.00310851	0.0334778	0.568501	13.4728	115.916	4.95501e-08	3.05101e-06	0	0	FALSE	FALSE	FALSE	FALSE	FALSE	FALSE
chr1	35077457	35077566	110	*	mm10_rmsk	exon	337		RMER13A1	RMER13A1_dup15	ERVK	LTR	91801	RP23-309D5.1	ENSMUST00000192315.1	intergenic	intergenic	intergenic	-1.9888	-0.908818	36.5239	1.0471e-07	1.36223e-05	-0.315623	9.73001	57.1887	3.14149e-06	2.42596e-05	0	0	TRUE	FALSE	TRUE	FALSE	FALSE	FALSE
chr1	35077593	35077896	304	*	mm10_rmsk	exon	1133		RMER13A1	RMER13A1_dup16	ERVK	LTR	91937	RP23-309D5.1	ENSMUST00000192315.1	intergenic	intergenic	intergenic	-1.71292	-0.431419	36.3908	1.09246e-07	1.40249e-05	-0.315623	9.73001	57.1887	3.14149e-06	2.42596e-05	0	0	TRUE	FALSE	TRUE	FALSE	FALSE	FALSE
chr1	35077897	35078121	225	*	mm10_rmsk	exon	773		MTEa	MTEa_dup198	ERVL-MaLR	LTR	92241	RP23-309D5.1	ENSMUST00000192315.1	intergenic	intergenic	intergenic	-1.26649	-0.817796	15.5581	0.000212515	0.00433609	-0.2922	12.679	58.9166	2.66017e-06	2.14153e-05	0	0	TRUE	FALSE	TRUE	FALSE	FALSE	FALSE
chr1	35096928	35097245	318	*	mm10_rmsk	exon	1459		RLTR10A	RLTR10A_dup15	ERVK	LTR	-81839	Gm25096	ENSMUST00000104043.1	intergenic	intergenic	intergenic	-1.04687	-0.703089	12.7216	0.000718535	0.0112129	-0.423761	9.70929	4.36398	0.0631353	0.0917512	5.72517e-296	2.56724e-295	TRUE	TRUE	TRUE	FALSE	FALSE	FALSE
chr1	35100213	35101692	1480	*	mm10_rmsk	exon	5366		Lx6	Lx6_dup312	L1	LINE	-77392	Gm25096	ENSMUST00000104043.1	intergenic	intergenic	intergenic	1.30847	-1.91354	9.08804	0.00377023	0.0384171	0.298114	12.3587	77.597	5.49313e-07	7.53997e-06	0	0	FALSE	FALSE	FALSE	FALSE	FALSE	FALSE
chr1	35117128	35118639	1512	*	mm10_rmsk	exon	7180		MERV1_I-int	MERV1_I-int_dup23	ERV1	LTR	-60445	Gm25096	ENSMUST00000104043.1	intergenic	intergenic	intergenic	1.00683	-1.13399	8.83026	0.00426149	0.0418871	0.376631	9.57002	37.1193	3.35929e-05	0.000135956	0	0	FALSE	FALSE	FALSE	FALSE	TRUE	TRUE
chr1	35178326	35178792	467	*	mm10_rmsk	exon	1244		RMER1B	RMER1B_dup79	RMER1B	Other	-292	Gm25096	ENSMUST00000104043.1	intergenic	proximal <=1000bp	Tss_prox_1kbp	1.71284	-2.30424	9.44244	0.00318962	0.0341084	0.0433976	12.0162	1.19464	0.29339	0.345947	0	0	FALSE	FALSE	FALSE	FALSE	FALSE	FALSE
chr1	35208666	35209504	839	*	mm10_rmsk	exon	2866		MMVL30-int	MMVL30-int_dup23	ERV1	LTR	29582	Gm25096	ENSMUST00000104043.1	intergenic	intergenic	intergenic	1.32572	-1.66573	10.6764	0.00179948	0.0224062	-0.0209952	9.06345	0.0714847	0.793603	0.816215	1.64175e-230	5.98443e-230	FALSE	FALSE	FALSE	FALSE	FALSE	FALSE
chr1	35210103	35210489	387	*	mm10_rmsk	exon	1544		RLTR1B-int	RLTR1B-int_dup16	ERV1	LTR	31019	Gm25096	ENSMUST00000104043.1	intergenic	intergenic	intergenic	1.75029	-2.4266	9.53484	0.0030542	0.033066	0.389165	8.57882	67.615	1.21903e-06	1.22598e-05	3.10425e-165	9.37916e-165	FALSE	FALSE	FALSE	FALSE	FALSE	FALSE
chr1	35215273	35215499	227	*	mm10_rmsk	exon	612		MLTR14	MLTR14_dup74	ERV1	LTR	36189	Gm25096	ENSMUST00000104043.1	intergenic	intergenic	intergenic	-1.02642	-0.454463	13.3791	0.000538844	0.0089801	-0.0952499	10.955	14.6774	0.00192872	0.00404165	0	0	FALSE	FALSE	FALSE	FALSE	FALSE	FALSE
chr1	35215842	35216126	285	*	mm10_rmsk	exon	498		MLT1B	MLT1B_dup87	ERVL-MaLR	LTR	36758	Gm25096	ENSMUST00000104043.1	intergenic	intergenic	intergenic	-1.26219	0.086711	25.5522	4.3433e-06	0.000206334	0.0498691	10.9914	2.636	0.127423	0.168742	0	0	FALSE	FALSE	FALSE	FALSE	FALSE	FALSE
chr1	35218298	35218578	281	*	mm10_rmsk	exon	1401		ORR1A4	ORR1A4_dup100	ERVL-MaLR	LTR	39214	Gm25096	ENSMUST00000104043.1	intergenic	intergenic	intergenic	1.5169	-2.09128	8.3076	0.00547515	0.0499357	0.0380346	11.167	1.67359	0.217332	0.267835	0	0	FALSE	FALSE	FALSE	FALSE	FALSE	FALSE
chr1	35229347	35229713	367	*	mm10_rmsk	exon	2148		ORR1A3	ORR1A3_dup59	ERVL-MaLR	LTR	50263	Gm25096	ENSMUST00000104043.1	intergenic	intergenic	intergenic	1.62289	-2.41236	8.40827	0.0052159	0.0482746	0.113205	10.224	11.7022	0.00429877	0.00826517	0	0	FALSE	FALSE	FALSE	FALSE	FALSE	FALSE
chr1	35235431	35236165	735	*	mm10_rmsk	exon	3561		RMER6A	RMER6A_dup57	ERVK	LTR	56347	Gm25096	ENSMUST00000104043.1	intergenic	intergenic	intergenic	1.51469	-2.2512	9.05851	0.00382336	0.0388043	0.02397	10.6543	0.948996	0.346995	0.399885	0	0	FALSE	FALSE	FALSE	FALSE	FALSE	FALSE
chr1	35247594	35247860	267	*	mm10_rmsk	exon	693		MTE2a	MTE2a_dup157	ERVL-MaLR	LTR	68510	Gm25096	ENSMUST00000104043.1	intergenic	intergenic	intergenic	-1.33283	-1.88148	9.05004	0.00383876	0.038914	-0.169323	12.136	28.5191	0.000115331	0.000368901	0	0	FALSE	FALSE	FALSE	FALSE	FALSE	FALSE
chr1	35299121	35299468	348	*	mm10_rmsk	exon	1204		RMER15-int	RMER15-int_dup45	ERVL	LTR	120037	Gm25096	ENSMUST00000104043.1	intergenic	intergenic	intergenic	2.28049	-2.44315	13.0082	0.000633556	0.0101896	0.131834	9.91364	24.1559	0.00024829	0.000691135	0	0	FALSE	FALSE	FALSE	FALSE	FALSE	FALSE
chr1	35341668	35342319	652	*	mm10_rmsk	exon	2960		RMER19A	RMER19A_dup32	ERVK	LTR	162584	Gm25096	ENSMUST00000104043.1	intergenic	intergenic	intergenic	1.72471	-2.44953	8.69002	0.00455651	0.0439043	0.249256	9.36632	52.3064	5.14461e-06	3.42668e-05	0	0	FALSE	FALSE	FALSE	FALSE	FALSE	FALSE
chr1	35344364	35344742	379	*	mm10_rmsk	exon	768		RMER17C	RMER17C_dup97	ERVK	LTR	165280	Gm25096	ENSMUST00000104043.1	intergenic	intergenic	intergenic	-1.81307	0.519124	47.0941	4.33656e-09	1.70474e-06	-0.174785	11.5718	3.94549	0.0712389	0.1022	0	0	TRUE	TRUE	TRUE	FALSE	FALSE	FALSE
chr1	35344756	35345262	507	*	mm10_rmsk	exon	1500		RMER15	RMER15_dup236	ERVL	LTR	165672	Gm25096	ENSMUST00000104043.1	intergenic	intergenic	intergenic	-1.73251	0.363287	44.3802	9.50665e-09	2.76596e-06	-0.386955	12.6786	57.0863	3.17301e-06	2.43192e-05	0	0	TRUE	TRUE	TRUE	FALSE	FALSE	FALSE
chr1	35348403	35348594	192	*	mm10_rmsk	exon	308		B4A	B4A_dup841	B4	SINE	169319	Gm25096	ENSMUST00000104043.1	intergenic	intergenic	intergenic	-1.62571	-0.628186	32.6311	3.71677e-07	3.3238e-05	0.0753296	14.4644	7.74941	0.0149756	0.0252756	0	0	TRUE	FALSE	TRUE	FALSE	TRUE	FALSE
chr1	35356205	35356681	477	*	mm10_rmsk	exon	2709		RLTR11B	RLTR11B_dup10	ERVK	LTR	177121	Gm25096	ENSMUST00000104043.1	intergenic	intergenic	intergenic	-1.72928	-0.709779	27.1864	2.41534e-06	0.000131687	-0.025535	8.24411	0.971447	0.341542	0.395227	1.07109e-189	3.44824e-189	TRUE	FALSE	TRUE	FALSE	FALSE	FALSE
chr1	35357392	35357522	131	*	mm10_rmsk	exon	271		RMER15	RMER15_dup238	ERVL	LTR	178308	Gm25096	ENSMUST00000104043.1	intergenic	intergenic	intergenic	-1.84669	-0.789985	33.3492	2.92976e-07	2.80269e-05	-0.386955	12.6786	57.0863	3.17301e-06	2.43192e-05	0	0	TRUE	TRUE	TRUE	FALSE	FALSE	FALSE
chr1	35369564	35370100	537	*	mm10_rmsk	exon	668		L1MDa	L1MDa_dup58	L1	LINE	190480	Gm25096	ENSMUST00000104043.1	intergenic	intergenic	intergenic	-1.52858	1.41181	34.4912	2.01489e-07	2.15474e-05	-0.0968633	9.30415	9.61972	0.00804533	0.0145413	0	0	TRUE	TRUE	TRUE	FALSE	FALSE	FALSE
chr1	35370173	35370357	185	*	mm10_rmsk	exon	317		L1MDa	L1MDa_dup59	L1	LINE	191089	Gm25096	ENSMUST00000104043.1	intergenic	intergenic	intergenic	-1.16654	-1.09983	12.2964	0.000867074	0.0129427	-0.0968633	9.30415	9.61972	0.00804533	0.0145413	0	0	TRUE	FALSE	TRUE	FALSE	FALSE	FALSE
chr1	35385385	35385505	121	*	mm10_rmsk	exon	329		MLT2F	MLT2F_dup2	ERVL	LTR	206301	Gm25096	ENSMUST00000104043.1	intergenic	intergenic	intergenic	-1.88592	0.221563	51.3975	1.30219e-09	8.43631e-07	-0.0618163	7.17771	1.65927	0.219201	0.269841	1.71213e-110	4.2335e-110	TRUE	TRUE	TRUE	FALSE	FALSE	FALSE
chr1	35385597	35385971	375	*	mm10_rmsk	exon	377		MLT2F	MLT2F_dup3	ERVL	LTR	206513	Gm25096	ENSMUST00000104043.1	intergenic	intergenic	intergenic	-1.66211	0.926649	46.7029	4.84984e-09	1.80868e-06	-0.0618163	7.17771	1.65927	0.219201	0.269841	1.71213e-110	4.2335e-110	TRUE	TRUE	TRUE	FALSE	FALSE	FALSE
chr1	35416991	35417269	279	*	mm10_rmsk	exon	655		L1MC2	L1MC2_dup33	L1	LINE	-234028	RP24-550I15.1	ENSMUST00000195168.1	intergenic	intergenic	intergenic	1.91499	-2.4725	11.626	0.00116973	0.0162487	-0.00835671	8.92216	0.0525503	0.822097	0.843196	6.50943e-241	2.47665e-240	FALSE	FALSE	FALSE	FALSE	FALSE	FALSE
chr1	35425030	35425253	224	*	mm10_rmsk	exon	307		ORR1F	ORR1F_dup259	ERVL-MaLR	LTR	-226044	RP24-550I15.1	ENSMUST00000195168.1	intergenic	intergenic	intergenic	1.72203	-2.45061	8.77332	0.00437879	0.0427132	-0.0391757	12.46	2.04136	0.175651	0.223356	0	0	FALSE	FALSE	FALSE	FALSE	FALSE	FALSE
chr1	35430449	35431443	995	*	mm10_rmsk	exon	6515		RLTR13D3	RLTR13D3_dup4	ERVK	LTR	-219854	RP24-550I15.1	ENSMUST00000195168.1	intergenic	intergenic	intergenic	1.6411	-1.88951	13.7481	0.000459171	0.00793283	0.219528	7.23513	17.592	0.000957502	0.00216454	5.14237e-74	1.05845e-73	FALSE	FALSE	FALSE	FALSE	FALSE	FALSE
chr1	35449275	35450459	1185	*	mm10_rmsk	exon	8348		Lx7	Lx7_dup684	L1	LINE	-200838	RP24-550I15.1	ENSMUST00000195168.1	intergenic	intergenic	intergenic	1.8013	-2.44101	10.3951	0.00204769	0.0246615	0.295529	13.1367	105.492	8.80305e-08	3.05101e-06	0	0	FALSE	FALSE	FALSE	FALSE	FALSE	FALSE
chr1	35452417	35452554	138	*	mm10_rmsk	exon	534		Lx7	Lx7_dup686	L1	LINE	-198743	RP24-550I15.1	ENSMUST00000195168.1	intergenic	intergenic	intergenic	-1.33445	0.111272	23.2261	1.02344e-05	0.000398918	0.295529	13.1367	105.492	8.80305e-08	3.05101e-06	0	0	TRUE	TRUE	TRUE	FALSE	FALSE	FALSE
chr1	35452563	35452735	173	*	mm10_rmsk	exon	470		Lx8	Lx8_dup683	L1	LINE	-198562	RP24-550I15.1	ENSMUST00000195168.1	intergenic	intergenic	intergenic	-1.68541	0.95966	43.2888	1.31142e-08	3.40081e-06	0.121817	13.7403	15.9377	0.00141182	0.00306763	0	0	TRUE	TRUE	TRUE	FALSE	FALSE	FALSE
chr1	35469403	35469639	237	*	mm10_rmsk	exon	497		ORR1E	ORR1E_dup247	ERVL-MaLR	LTR	-181658	RP24-550I15.1	ENSMUST00000195168.1	intergenic	intergenic	intergenic	-1.3841	0.232092	29.0489	1.25567e-06	8.09516e-05	-0.325711	12.9387	82.3757	3.86776e-07	6.01114e-06	0	0	TRUE	TRUE	TRUE	FALSE	FALSE	FALSE
chr1	35478360	35478483	124	*	mm10_rmsk	exon	330		B3A	B3A_dup840	B2	SINE	-172814	RP24-550I15.1	ENSMUST00000195168.1	intergenic	intergenic	intergenic	-1.19597	-1.05439	12.9198	0.0006586	0.0104926	-0.0693289	14.2699	6.57714	0.0228853	0.0371879	0	0	TRUE	TRUE	TRUE	FALSE	FALSE	FALSE
chr1	35482143	35482624	482	*	mm10_rmsk	exon	3786		L1_Mus2	L1_Mus2_dup491	L1	LINE	-168673	RP24-550I15.1	ENSMUST00000195168.1	intergenic	intergenic	intergenic	1.73946	-2.40912	10.4611	0.00198635	0.0241197	0.484439	13.0175	105.113	8.99763e-08	3.05101e-06	0	0	FALSE	FALSE	FALSE	FALSE	FALSE	FALSE
chr1	35484806	35489750	4945	*	mm10_rmsk	exon	31474		L1Md_F2	L1Md_F2_dup1129	L1	LINE	-161547	RP24-550I15.1	ENSMUST00000195168.1	intergenic	intergenic	intergenic	1.09129	-0.453372	16.5512	0.000140618	0.00313275	0.519061	15.1429	139.838	1.55383e-08	1.93193e-06	0	0	FALSE	FALSE	FALSE	FALSE	FALSE	FALSE
chr1	35500003	35500266	264	*	mm10_rmsk	exon	1413		Lx5c	Lx5c_dup291	L1	LINE	-151031	RP24-550I15.1	ENSMUST00000195168.1	intergenic	intergenic	intergenic	-1.90292	-2.40958	9.51588	0.00308149	0.0332722	0.275621	12.3036	49.7246	6.78061e-06	4.22898e-05	0	0	FALSE	FALSE	FALSE	FALSE	FALSE	FALSE
chr1	35514966	35515113	148	*	mm10_rmsk	exon	354		L1M4	L1M4_dup155	L1	LINE	-136184	RP24-550I15.1	ENSMUST00000195168.1	intergenic	intergenic	intergenic	-1.20984	-0.0677189	21.589	1.9016e-05	0.000645202	0.0357156	11.0706	1.17363	0.297501	0.350425	0	0	TRUE	TRUE	TRUE	FALSE	FALSE	FALSE
chr1	35535393	35535803	411	*	mm10_rmsk	exon	1701		RMER15	RMER15_dup246	ERVL	LTR	-115494	RP24-550I15.1	ENSMUST00000195168.1	intergenic	intergenic	intergenic	-1.30059	-1.59693	10.7641	0.00172871	0.0217438	-0.386955	12.6786	57.0863	3.17301e-06	2.43192e-05	0	0	FALSE	FALSE	TRUE	FALSE	FALSE	FALSE
chr1	35595491	35595882	392	*	mm10_rmsk	exon	2406		Lx3_Mus	Lx3_Mus_dup173	L1	LINE	-55415	RP24-550I15.1	ENSMUST00000195168.1	intergenic	intergenic	intergenic	-1.62593	-1.25446	19.2407	4.74322e-05	0.00132773	0.490828	12.3525	77.1477	5.68276e-07	7.57815e-06	0	0	TRUE	FALSE	TRUE	FALSE	FALSE	FALSE
chr1	35595880	35596592	713	*	mm10_rmsk	exon	5033		L1_Mur1	L1_Mur1_dup108	L1	LINE	-54705	RP24-550I15.1	ENSMUST00000195168.1	intergenic	intergenic	intergenic	-1.42669	-1.73824	11.0779	0.00149843	0.0195552	0.396038	10.8992	82.0644	3.955e-07	6.06253e-06	0	0	TRUE	FALSE	TRUE	FALSE	FALSE	FALSE
chr1	35598409	35598628	220	*	mm10_rmsk	exon	748		MLTR14	MLTR14_dup83	ERV1	LTR	-52669	RP24-550I15.1	ENSMUST00000195168.1	intergenic	intergenic	intergenic	-1.51422	-1.62532	12.1456	0.000927203	0.0136236	-0.0952499	10.955	14.6774	0.00192872	0.00404165	0	0	TRUE	FALSE	TRUE	FALSE	FALSE	FALSE
chr1	35608349	35608482	134	*	mm10_rmsk	exon	887		RLTR27	RLTR27_dup30	ERVK	LTR	-42815	RP24-550I15.1	ENSMUST00000195168.1	intergenic	intergenic	intergenic	-1.12425	-1.44414	9.10275	0.00374405	0.0382254	-0.799988	10.5008	19.9396	0.00118207	0.00261929	0	0	TRUE	TRUE	TRUE	FALSE	FALSE	FALSE
chr1	35608467	35608717	251	*	mm10_rmsk	exon	1850		RLTR10A	RLTR10A_dup16	ERVK	LTR	-42580	RP24-550I15.1	ENSMUST00000195168.1	intergenic	intergenic	intergenic	-1.23709	-0.274961	17.0999	0.000112243	0.00262102	-0.423761	9.70929	4.36398	0.0631353	0.0917512	5.72517e-296	2.56724e-295	TRUE	TRUE	TRUE	FALSE	FALSE	FALSE
chr1	35650245	35650825	581	*	mm10_rmsk	exon	1827		RLTR42-int	RLTR42-int_dup42	ERVK	LTR	-472	RP24-550I15.1	ENSMUST00000195168.1	intronic	proximal <=1000bp	Tss_prox_1kbp	-1.51334	0.215302	38.0352	6.49748e-08	9.78116e-06	-0.0993912	9.24754	16.6974	0.00117789	0.0026152	0	0	TRUE	TRUE	TRUE	FALSE	FALSE	FALSE
chr1	35650881	35650967	87	*	mm10_rmsk	exon	352		RLTR42-int	RLTR42-int_dup43	ERVK	LTR	-330	RP24-550I15.1	ENSMUST00000195168.1	intronic	proximal <=1000bp	Tss_prox_1kbp	-1.72611	0.573785	43.9179	1.08899e-08	3.01133e-06	-0.0993912	9.24754	16.6974	0.00117789	0.0026152	0	0	TRUE	TRUE	TRUE	FALSE	FALSE	FALSE
chr1	35651086	35651177	92	*	mm10_rmsk	exon	409		RLTR42-int	RLTR42-int_dup44	ERVK	LTR	-120	RP24-550I15.1	ENSMUST00000195168.1	intronic	proximal <=1000bp	Tss_prox_1kbp	-1.93931	-0.760711	36.3923	1.09194e-07	1.40199e-05	-0.0993912	9.24754	16.6974	0.00117789	0.0026152	0	0	FALSE	FALSE	FALSE	FALSE	FALSE	FALSE
chr1	35688102	35688193	92	*	mm10_rmsk	exon	264		ORR1E	ORR1E_dup252	ERVL-MaLR	LTR	36805	RP24-550I15.1	ENSMUST00000195168.1	intergenic	intergenic	intergenic	-1.94713	0.14381	50.9839	1.45873e-09	8.94899e-07	-0.325711	12.9387	82.3757	3.86776e-07	6.01114e-06	0	0	TRUE	TRUE	TRUE	FALSE	FALSE	FALSE
chr1	35688291	35688369	79	*	mm10_rmsk	exon	255		ORR1E	ORR1E_dup253	ERVL-MaLR	LTR	36994	RP24-550I15.1	ENSMUST00000195168.1	intergenic	intergenic	intergenic	-1.05307	-0.592841	13.6849	0.000471904	0.00810442	-0.325711	12.9387	82.3757	3.86776e-07	6.01114e-06	0	0	TRUE	TRUE	TRUE	FALSE	FALSE	FALSE
chr1	35701622	35701885	264	*	mm10_rmsk	exon	403		Tigger7	Tigger7_dup59	TcMar-Tigger	DNA	50325	RP24-550I15.1	ENSMUST00000195168.1	intergenic	intergenic	intergenic	-2.20686	-2.18622	13.9512	0.000420637	0.00740815	0.0408745	10.0307	2.82424	0.115677	0.156757	0	0	FALSE	FALSE	TRUE	FALSE	FALSE	FALSE
chr1	35737562	35737943	382	*	mm10_rmsk	exon	2646		ORR1B1	ORR1B1_dup210	ERVL-MaLR	LTR	-23659	Gm25634	ENSMUST00000082667.1	intergenic	intergenic	intergenic	1.9619	-2.38059	12.1136	0.000940501	0.0137716	-0.0271086	12.3851	0.725931	0.408968	0.463194	0	0	FALSE	FALSE	FALSE	FALSE	FALSE	FALSE
chr1	35754021	35754724	704	*	mm10_rmsk	exon	3210		RMER17B	RMER17B_dup58	ERVK	LTR	-6878	Gm25634	ENSMUST00000082667.1	intergenic	intergenic	intergenic	-1.18528	0.223825	20.1394	3.33104e-05	0.00100385	-0.640441	12.3098	31.6377	0.000180857	0.000533981	0	0	TRUE	TRUE	TRUE	FALSE	FALSE	FALSE
chr1	35754722	35754834	113	*	mm10_rmsk	exon	745		RMER17B	RMER17B_dup59	ERVK	LTR	-6768	Gm25634	ENSMUST00000082667.1	intergenic	intergenic	intergenic	-1.37863	-1.94695	8.89602	0.00413012	0.040969	-0.640441	12.3098	31.6377	0.000180857	0.000533981	0	0	FALSE	FALSE	FALSE	FALSE	FALSE	FALSE
chr1	35762690	35763498	809	*	mm10_rmsk	exon	2133		RMER1B	RMER1B_dup80	RMER1B	Other	1088	Gm25634	ENSMUST00000082667.1	intergenic	intergenic	intergenic	-1.20103	0.808595	26.735	2.83696e-06	0.000148902	0.0433976	12.0162	1.19464	0.29339	0.345947	0	0	TRUE	TRUE	TRUE	FALSE	FALSE	FALSE
chr1	35763512	35764218	707	*	mm10_rmsk	exon	4125		RMER1A	RMER1A_dup39	RMER1A	Other	1910	Gm25634	ENSMUST00000082667.1	intergenic	intergenic	intergenic	-1.48298	0.620319	37.2219	8.3918e-08	1.16522e-05	-0.0317533	11.4648	0.511812	0.486465	0.538965	0	0	TRUE	TRUE	TRUE	FALSE	FALSE	FALSE
chr1	35764320	35764799	480	*	mm10_rmsk	exon	992		MT2A	MT2A_dup125	ERVL	LTR	2718	Gm25634	ENSMUST00000082667.1	intergenic	intergenic	intergenic	-1.58796	0.781377	42.3205	1.74986e-08	4.08851e-06	0.0807366	11.1268	8.80359	0.0104713	0.018511	0	0	TRUE	TRUE	TRUE	FALSE	FALSE	FALSE
chr1	35779802	35780351	550	*	mm10_rmsk	exon	1772		MT2B1	MT2B1_dup107	ERVL	LTR	18200	Gm25634	ENSMUST00000082667.1	intergenic	intergenic	intergenic	1.4007	-1.99726	9.23824	0.0035117	0.0365228	0.312012	10.3235	94.5783	1.70124e-07	3.88507e-06	0	0	FALSE	FALSE	FALSE	FALSE	FALSE	FALSE
chr1	35810109	35810203	95	*	mm10_rmsk	exon	272		MLTR14	MLTR14_dup91	ERV1	LTR	3135	RP23-463E4.1	ENSMUST00000187528.1	exonic	exonic	gene_body	-1.38847	-1.82903	9.76358	0.0027442	0.0305878	-0.0952499	10.955	14.6774	0.00192872	0.00404165	0	0	FALSE	FALSE	FALSE	FALSE	FALSE	FALSE
chr1	35850462	35850755	294	*	mm10_rmsk	exon	671		B4	B4_dup545	B4	SINE	-29090	RP24-72B22.1	ENSMUST00000194261.1	intergenic	intergenic	intergenic	-1.00955	1.50302	16.1737	0.000164391	0.00354212	0.0559679	13.6316	3.88846	0.0693232	0.0998362	0	0	TRUE	TRUE	TRUE	FALSE	FALSE	TRUE
chr1	35858368	35858739	372	*	mm10_rmsk	exon	842		MTD	MTD_dup678	ERVL-MaLR	LTR	-21106	RP24-72B22.1	ENSMUST00000194261.1	intergenic	intergenic	intergenic	-1.73903	0.640685	48.5686	2.85569e-09	1.32443e-06	-0.128328	13.8494	24.9898	0.000212962	0.000611037	0	0	TRUE	TRUE	TRUE	FALSE	FALSE	FALSE
chr1	35890733	35890809	77	*	mm10_rmsk	exon	241		L2b	L2b_dup78	L2	LINE	10888	RP24-72B22.1	ENSMUST00000194261.1	intergenic	intergenic	intergenic	-1.83658	0.136412	47.0702	4.36625e-09	1.70906e-06	-0.157819	11.6429	35.8181	3.78304e-05	0.000148015	0	0	TRUE	TRUE	TRUE	FALSE	FALSE	FALSE
chr1	35918694	35918841	148	*	mm10_rmsk	exon	256		MER77	MER77_dup10	ERVL	LTR	38849	RP24-72B22.1	ENSMUST00000194261.1	intergenic	intergenic	intergenic	-1.3956	-0.0795891	26.3047	3.30998e-06	0.000167633	0.258448	7.14391	53.7001	4.4524e-06	3.09176e-05	1.09089e-55	2.02748e-55	TRUE	FALSE	TRUE	FALSE	FALSE	FALSE
chr1	35922679	35923094	416	*	mm10_rmsk	exon	583		IMPB_01	IMPB_01_dup235	Satellite	Satellite	-35825	RP24-72B22.2	ENSMUST00000191763.1	intergenic	intergenic	intergenic	2.64966	-2.49211	19.2095	4.80229e-05	0.00134052	0.274633	11.8608	41.784	1.71433e-05	8.23859e-05	0	0	FALSE	FALSE	FALSE	FALSE	FALSE	FALSE
chr1	35962216	35962334	119	*	mm10_rmsk	exon	392		PB1D9	PB1D9_dup195	Alu	SINE	3297	RP24-72B22.2	ENSMUST00000191763.1	intergenic	intergenic	intergenic	-1.13855	0.522628	21.7001	1.8225e-05	0.000624127	-0.245535	12.562	18.2067	0.000833525	0.00193109	0	0	TRUE	TRUE	FALSE	FALSE	FALSE	FALSE
chr1	35973085	35973215	131	*	mm10_rmsk	exon	691		B1_Mur1	B1_Mur1_dup307	Alu	SINE	-13158	RP24-424K5.3	ENSMUST00000192572.1	intergenic	intergenic	intergenic	-2.04988	-2.21094	14.4093	0.000345595	0.00635439	-0.179663	13.0741	14.4372	0.00205038	0.00424761	0	0	FALSE	FALSE	FALSE	FALSE	TRUE	FALSE
chr1	35973223	35973357	135	*	mm10_rmsk	exon	316		L1MD	L1MD_dup82	L1	LINE	-13016	RP24-424K5.3	ENSMUST00000192572.1	intergenic	intergenic	intergenic	-2.06976	-2.03169	16.8887	0.000122388	0.00280675	0.0863597	9.63238	5.13773	0.0403057	0.0619534	0	0	FALSE	FALSE	FALSE	FALSE	TRUE	FALSE
chr1	35974008	35974106	99	*	mm10_rmsk	exon	363		PB1D7	PB1D7_dup167	Alu	SINE	-12267	RP24-424K5.3	ENSMUST00000192572.1	intergenic	intergenic	intergenic	-1.26259	-1.45542	10.1344	0.00230969	0.0269715	-0.319159	12.459	36.3072	3.53263e-05	0.000141179	0	0	FALSE	FALSE	FALSE	FALSE	FALSE	FALSE
chr1	36010653	36010778	126	*	mm10_rmsk	exon	290		B1_Mur3	B1_Mur3_dup170	Alu	SINE	-212	RP24-424K5.4	ENSMUST00000194823.1	intronic	proximal <=1000bp	Tss_prox_1kbp	-1.51937	0.443503	35.9416	1.26115e-07	1.54883e-05	-0.199309	12.3985	15.6938	0.00149799	0.00323602	0	0	TRUE	FALSE	TRUE	FALSE	FALSE	TRUE
chr1	36010876	36011203	328	*	mm10_rmsk	exon	325		ORR1E	ORR1E_dup262	ERVL-MaLR	LTR	0	RP24-424K5.4	ENSMUST00000194823.1	exonic	TSS	Tss_prox_1kbp	-1.18254	1.6171	24.5838	6.18587e-06	0.000270301	-0.325711	12.9387	82.3757	3.86776e-07	6.01114e-06	0	0	TRUE	TRUE	TRUE	FALSE	FALSE	TRUE
chr1	36011904	36012284	381	*	mm10_rmsk	exon	1518		RMER17C	RMER17C_dup102	ERVK	LTR	832	RP24-424K5.1	ENSMUST00000192017.1	intergenic	proximal <=1000bp	Tss_prox_1kbp	1.42364	-1.82824	11.594	0.00118666	0.0164216	-0.174785	11.5718	3.94549	0.0712389	0.1022	0	0	FALSE	FALSE	FALSE	FALSE	FALSE	FALSE
chr1	36013308	36013724	417	*	mm10_rmsk	exon	867		ORR1B1-int	ORR1B1-int_dup39	ERVL-MaLR	LTR	2236	RP24-424K5.1	ENSMUST00000192017.1	intergenic	intergenic	intergenic	-1.04071	-0.978486	10.2485	0.00219092	0.0259365	0.312658	9.65688	106.325	8.39243e-08	3.05101e-06	0	0	FALSE	FALSE	FALSE	FALSE	FALSE	FALSE
chr1	36013679	36014153	475	*	mm10_rmsk	exon	1308		RMER20C_Mm	RMER20C_Mm_dup15	ERVK	LTR	2607	RP24-424K5.1	ENSMUST00000192017.1	intergenic	intergenic	intergenic	-1.62396	1.15543	41.594	2.1767e-08	4.71267e-06	-0.263126	9.68951	37.0604	3.18322e-05	0.000130957	0	0	TRUE	TRUE	TRUE	FALSE	FALSE	FALSE
chr1	36014157	36014817	661	*	mm10_rmsk	exon	2380		ORR1B1-int	ORR1B1-int_dup40	ERVL-MaLR	LTR	3085	RP24-424K5.1	ENSMUST00000192017.1	intergenic	intergenic	intergenic	-1.16103	-0.0236871	16.8359	0.000125071	0.0028557	0.312658	9.65688	106.325	8.39243e-08	3.05101e-06	0	0	FALSE	FALSE	FALSE	FALSE	FALSE	FALSE
chr1	36026746	36026902	157	*	mm10_rmsk	exon	530		B4A	B4A_dup920	B4	SINE	-4116	RP24-424K5.2	ENSMUST00000195698.1	intergenic	intergenic	intergenic	2.01939	-2.57464	8.49354	0.00500637	0.0469069	0.0753296	14.4644	7.74941	0.0149756	0.0252756	0	0	FALSE	FALSE	FALSE	FALSE	FALSE	FALSE
chr1	36030992	36031112	121	*	mm10_rmsk	exon	197		MIRb	MIRb_dup238	MIR	SINE	0	RP24-424K5.2	ENSMUST00000195698.1	exonic	TSS	Tss_prox_1kbp	-1.65481	0.249599	40.622	2.92247e-08	5.71722e-06	-0.165951	13.1579	40.2205	2.09103e-05	9.5896e-05	0	0	TRUE	FALSE	TRUE	FALSE	FALSE	FALSE
chr1	36057128	36057304	177	*	mm10_rmsk	exon	563		B3A	B3A_dup860	B2	SINE	-11096	Hs6st1	ENSMUST00000088174.3	intergenic	intergenic	intergenic	-1.34175	-0.612038	21.277	2.14337e-05	0.000709497	-0.0693289	14.2699	6.57714	0.0228853	0.0371879	0	0	FALSE	FALSE	FALSE	FALSE	FALSE	FALSE
chr1	36057445	36057522	78	*	mm10_rmsk	exon	324		ID4_	ID4__dup218	ID	SINE	-10878	Hs6st1	ENSMUST00000088174.3	intergenic	intergenic	intergenic	-1.46009	-1.78673	8.56567	0.00483603	0.0457978	-0.141335	12.0045	20.1414	0.000548502	0.00134679	0	0	FALSE	FALSE	FALSE	FALSE	FALSE	FALSE
chr1	36129996	36130249	254	*	mm10_rmsk	exon	1244		MTEa	MTEa_dup221	ERVL-MaLR	LTR	-1793	RP23-173H19.3	ENSMUST00000193983.1	intergenic	intergenic	intergenic	-1.5058	0.0387301	36.8632	9.40083e-08	1.26299e-05	-0.2922	12.679	58.9166	2.66017e-06	2.14153e-05	0	0	TRUE	FALSE	TRUE	FALSE	FALSE	FALSE
chr1	36130942	36131241	300	*	mm10_rmsk	exon	755		MLTR14	MLTR14_dup97	ERV1	LTR	-801	RP23-173H19.3	ENSMUST00000193983.1	intergenic	proximal <=1000bp	Tss_prox_1kbp	-1.10707	-0.411418	16.8781	0.000122919	0.00281663	-0.0952499	10.955	14.6774	0.00192872	0.00404165	0	0	TRUE	FALSE	TRUE	FALSE	FALSE	TRUE
chr1	36131259	36131413	155	*	mm10_rmsk	exon	568		MLTR14	MLTR14_dup98	ERV1	LTR	-629	RP23-173H19.3	ENSMUST00000193983.1	intergenic	proximal <=1000bp	Tss_prox_1kbp	-1.15937	-0.268025	17.3041	0.000103264	0.00245593	-0.0952499	10.955	14.6774	0.00192872	0.00404165	0	0	TRUE	FALSE	TRUE	FALSE	FALSE	FALSE
chr1	36134675	36134826	152	*	mm10_rmsk	exon	576		B3A	B3A_dup865	B2	SINE	2633	RP23-173H19.3	ENSMUST00000193983.1	exonic	exonic	gene_body	-1.28121	0.517868	26.9335	2.64286e-06	0.000140959	-0.0693289	14.2699	6.57714	0.0228853	0.0371879	0	0	TRUE	TRUE	TRUE	FALSE	FALSE	FALSE
chr1	36255508	36255849	342	*	mm10_rmsk	exon	1153		MLTR14	MLTR14_dup99	ERV1	LTR	10788	Uggt1	ENSMUST00000192159.1	intergenic	intergenic	intergenic	-1.01246	0.574629	15.6328	0.000205973	0.00422996	-0.0952499	10.955	14.6774	0.00192872	0.00404165	0	0	FALSE	FALSE	FALSE	FALSE	TRUE	TRUE
chr1	36255865	36255955	91	*	mm10_rmsk	exon	305		MLTR14	MLTR14_dup100	ERV1	LTR	11145	Uggt1	ENSMUST00000192159.1	intergenic	intergenic	intergenic	-1.00183	0.106442	14.597	0.000318988	0.00596812	-0.0952499	10.955	14.6774	0.00192872	0.00404165	0	0	TRUE	FALSE	TRUE	FALSE	TRUE	TRUE
chr1	36256251	36256350	100	*	mm10_rmsk	exon	624		PB1D7	PB1D7_dup174	Alu	SINE	11531	Uggt1	ENSMUST00000192159.1	intergenic	intergenic	intergenic	-1.27331	-0.58087	20.3771	3.03607e-05	0.00093349	-0.319159	12.459	36.3072	3.53263e-05	0.000141179	0	0	FALSE	FALSE	FALSE	FALSE	TRUE	TRUE
chr1	36268788	36268850	63	*	mm10_rmsk	exon	271		RLTR20A4	RLTR20A4_dup105	ERVK	LTR	-4585	Neurl3	ENSMUST00000056946.7	intronic	intronic	gene_body	-1.43798	-1.1526	13.5693	0.000496133	0.00842437	0.387782	10.2057	72.6076	8.08689e-07	9.69813e-06	0	0	FALSE	FALSE	FALSE	FALSE	TRUE	FALSE
chr1	36270039	36270151	113	*	mm10_rmsk	exon	320		B1F	B1F_dup367	Alu	SINE	-3284	Neurl3	ENSMUST00000056946.7	intronic	intronic	gene_body	-1.30116	-0.580466	19.5756	4.15568e-05	0.00119447	-0.210784	13.2074	26.2569	0.000169765	0.00050658	0	0	FALSE	FALSE	FALSE	FALSE	FALSE	FALSE
chr1	36281836	36281928	93	*	mm10_rmsk	exon	268		ORR1G	ORR1G_dup54	ERVL-MaLR	LTR	7157	Neurl3	ENSMUST00000188666.2	intergenic	intergenic	intergenic	-1.3306	-1.47629	13.1759	0.000588747	0.00962501	0.0498848	10.0305	2.41065	0.143482	0.187329	0	0	FALSE	FALSE	FALSE	FALSE	FALSE	FALSE
chr1	36281929	36282145	217	*	mm10_rmsk	exon	718		B3	B3_dup1254	B2	SINE	7250	Neurl3	ENSMUST00000188666.2	intergenic	intergenic	intergenic	-1.30342	-0.436353	21.4228	2.02671e-05	0.000678314	-0.0408682	15.0047	1.97967	0.18188	0.229711	0	0	TRUE	FALSE	FALSE	FALSE	FALSE	FALSE
chr1	36282146	36282207	62	*	mm10_rmsk	exon	268		ORR1G	ORR1G_dup55	ERVL-MaLR	LTR	7467	Neurl3	ENSMUST00000188666.2	intergenic	intergenic	intergenic	-1.7101	-0.520488	30.0231	8.97086e-07	6.32548e-05	0.0498848	10.0305	2.41065	0.143482	0.187329	0	0	FALSE	FALSE	FALSE	FALSE	FALSE	FALSE
chr1	36282240	36282607	368	*	mm10_rmsk	exon	467		ORR1E	ORR1E_dup265	ERVL-MaLR	LTR	7561	Neurl3	ENSMUST00000188666.2	intergenic	intergenic	intergenic	-1.5624	0.210728	35.6639	1.37872e-07	1.65148e-05	-0.325711	12.9387	82.3757	3.86776e-07	6.01114e-06	0	0	TRUE	FALSE	TRUE	FALSE	FALSE	TRUE
chr1	36282608	36282720	113	*	mm10_rmsk	exon	722		B1_Mur4	B1_Mur4_dup307	Alu	SINE	7929	Neurl3	ENSMUST00000188666.2	intergenic	intergenic	intergenic	-1.28397	-1.45567	11.8124	0.00107585	0.0152557	-0.197949	13.0761	16.1554	0.00133973	0.00293351	0	0	FALSE	FALSE	FALSE	FALSE	FALSE	TRUE
chr1	36291198	36291384	187	*	mm10_rmsk	exon	608		B3	B3_dup1257	B2	SINE	-16349	Arid5a	ENSMUST00000126413.7	intergenic	intergenic	intergenic	-1.27047	0.0672232	22.1671	1.52552e-05	0.000543726	-0.0408682	15.0047	1.97967	0.18188	0.229711	0	0	TRUE	FALSE	TRUE	FALSE	FALSE	FALSE
chr1	36291450	36291504	55	*	mm10_rmsk	exon	241		ID_B1	ID_B1_dup772	B4	SINE	-16229	Arid5a	ENSMUST00000126413.7	intergenic	intergenic	intergenic	-1.56474	0.230973	35.7586	1.33738e-07	1.61418e-05	-0.175808	14.6041	23.3246	0.000290382	0.000788684	0	0	TRUE	FALSE	TRUE	FALSE	FALSE	FALSE
chr1	36291505	36291574	70	*	mm10_rmsk	exon	253		MLTR18C_MM	MLTR18C_MM_dup11	ERVK	LTR	-16159	Arid5a	ENSMUST00000126413.7	intergenic	intergenic	intergenic	-1.86012	0.302856	50.4375	1.69587e-09	9.77019e-07	-0.0953208	7.55674	5.96217	0.0289507	0.0458216	2.1027e-84	4.56932e-84	TRUE	FALSE	TRUE	FALSE	FALSE	FALSE
chr1	36291597	36291735	139	*	mm10_rmsk	exon	1110		B1_Mus2	B1_Mus2_dup598	Alu	SINE	-15998	Arid5a	ENSMUST00000126413.7	intergenic	intergenic	intergenic	-1.6239	0.640607	41.2772	2.39534e-08	5.01771e-06	-0.176162	13.8323	10.0652	0.00699884	0.0128811	0	0	TRUE	FALSE	TRUE	FALSE	FALSE	TRUE
chr1	36291745	36292354	610	*	mm10_rmsk	exon	2178		MLTR18C_MM	MLTR18C_MM_dup12	ERVK	LTR	-15379	Arid5a	ENSMUST00000126413.7	intergenic	intergenic	intergenic	-1.11232	1.31153	20.7486	2.62816e-05	0.000833584	-0.0953208	7.55674	5.96217	0.0289507	0.0458216	2.1027e-84	4.56932e-84	TRUE	TRUE	TRUE	FALSE	FALSE	TRUE
chr1	36314656	36315226	571	*	mm10_rmsk	exon	3185		RLTR20D	RLTR20D_dup17	ERVK	LTR	-766	Arid5a	ENSMUST00000147123.7	intronic	proximal <=1000bp	Tss_prox_1kbp	-1.09898	3.95981	18.3443	6.7801e-05	0.00176286	-0.826087	9.45256	38.1948	9.17838e-05	0.000306794	0	0	TRUE	TRUE	TRUE	TRUE	FALSE	FALSE
chr1	36315227	36315333	107	*	mm10_rmsk	exon	466		PB1D9	PB1D9_dup200	Alu	SINE	-659	Arid5a	ENSMUST00000147123.7	intronic	proximal <=1000bp	Tss_prox_1kbp	-1.1693	2.59554	23.1765	1.0426e-05	0.000404824	-0.245535	12.562	18.2067	0.000833525	0.00193109	0	0	TRUE	TRUE	TRUE	FALSE	FALSE	FALSE
chr1	36354324	36354505	182	*	mm10_rmsk	exon	669		B3A	B3A_dup878	B2	SINE	5566	Mir6898	ENSMUST00000184898.1	intronic	intronic	gene_body	1.42401	-2.04431	9.33968	0.00334764	0.0352987	-0.0693289	14.2699	6.57714	0.0228853	0.0371879	0	0	FALSE	FALSE	FALSE	FALSE	FALSE	FALSE
chr1	36368250	36368391	142	*	mm10_rmsk	exon	903		B1_Mur2	B1_Mur2_dup260	Alu	SINE	209	Kansl3	ENSMUST00000188528.6	intronic	proximal <=1000bp	Tss_prox_1kbp	-1.04837	1.14208	16.9538	0.000119162	0.00274934	-0.133884	12.7428	10.2743	0.00656262	0.0121381	0	0	TRUE	TRUE	TRUE	TRUE	FALSE	TRUE
chr1	36369464	36369566	103	*	mm10_rmsk	exon	470		PB1D7	PB1D7_dup182	Alu	SINE	283	Kansl3	ENSMUST00000010597.9	intergenic	proximal <=1000bp	Tss_prox_1kbp	-1.11053	1.1617	21.1355	2.26336e-05	0.000740963	-0.319159	12.459	36.3072	3.53263e-05	0.000141179	0	0	TRUE	FALSE	TRUE	TRUE	FALSE	TRUE
chr1	36408254	36408309	56	*	mm10_rmsk	exon	193		MIR3	MIR3_dup72	MIR	SINE	-8579	Fer1l5	ENSMUST00000140452.3	intronic	intronic	gene_body	-1.43954	-1.15399	17.5525	9.33348e-05	0.002268	-0.29378	11.8255	83.1487	3.66046e-07	5.8515e-06	0	0	FALSE	FALSE	FALSE	FALSE	FALSE	FALSE
chr1	36409559	36409946	388	*	mm10_rmsk	exon	2138		MTC	MTC_dup365	ERVL-MaLR	LTR	-6942	Fer1l5	ENSMUST00000140452.3	intronic	intronic	gene_body	-1.08268	-0.217591	14.4221	0.000343701	0.00632798	-0.0712501	12.9646	7.63021	0.0156148	0.0261341	0	0	FALSE	FALSE	FALSE	FALSE	FALSE	FALSE
chr1	36413291	36413428	138	*	mm10_rmsk	exon	592		ID_B1	ID_B1_dup791	B4	SINE	-3460	Fer1l5	ENSMUST00000140452.3	intronic	intronic	gene_body	-1.45994	-1.42644	15.7166	0.000198873	0.00411559	-0.175808	14.6041	23.3246	0.000290382	0.000788684	0	0	FALSE	FALSE	FALSE	FALSE	FALSE	FALSE
chr1	36439891	36440074	184	*	mm10_rmsk	exon	1413		B2_Mm2	B2_Mm2_dup776	B2	SINE	223	Lman2l	ENSMUST00000192969.5	exonic	proximal <=1000bp	Tss_prox_1kbp	-1.44916	-1.75012	11.4282	0.00127867	0.0173648	0.10167	14.026	5.41603	0.0359684	0.0559787	0	0	TRUE	FALSE	TRUE	FALSE	FALSE	FALSE
chr1	36445698	36445751	54	*	mm10_rmsk	exon	303		PB1D10	PB1D10_dup524	Alu	SINE	427	Lman2l	ENSMUST00000125304.7	intergenic	proximal <=1000bp	Tss_prox_1kbp	-1.21637	0.757128	23.4584	9.3836e-06	0.000373013	-0.196601	13.5951	25.3633	0.00019904	0.000578507	0	0	TRUE	FALSE	TRUE	FALSE	FALSE	TRUE
chr1	36445752	36445788	37	*	mm10_rmsk	exon	301		ID_B1	ID_B1_dup795	B4	SINE	481	Lman2l	ENSMUST00000125304.7	intergenic	proximal <=1000bp	Tss_prox_1kbp	-1.33035	0.184665	24.2969	6.87497e-06	0.000293169	-0.175808	14.6041	23.3246	0.000290382	0.000788684	0	0	TRUE	FALSE	TRUE	FALSE	FALSE	TRUE
chr1	36445807	36445948	142	*	mm10_rmsk	exon	775		B1_Mur4	B1_Mur4_dup315	Alu	SINE	536	Lman2l	ENSMUST00000125304.7	intergenic	proximal <=1000bp	Tss_prox_1kbp	-1.26423	-0.382226	19.0551	5.1054e-05	0.00140737	-0.197949	13.0761	16.1554	0.00133973	0.00293351	0	0	FALSE	FALSE	FALSE	FALSE	FALSE	TRUE
chr1	36464292	36465148	857	*	mm10_rmsk	exon	1682		RMER17B2	RMER17B2_dup16	ERVK	LTR	-6472	Cnnm4	ENSMUST00000153128.1	intergenic	intergenic	intergenic	-1.18473	1.69044	23.4915	9.26831e-06	0.000369658	-0.624956	10.1127	50.8372	1.4714e-05	7.18993e-05	0	0	TRUE	TRUE	TRUE	FALSE	FALSE	FALSE
chr1	36465447	36465535	89	*	mm10_rmsk	exon	362		ID4_	ID4__dup228	ID	SINE	-6085	Cnnm4	ENSMUST00000153128.1	intergenic	intergenic	intergenic	-1.32709	-1.77476	9.79061	0.00270981	0.0303092	-0.141335	12.0045	20.1414	0.000548502	0.00134679	0	0	FALSE	FALSE	FALSE	FALSE	FALSE	FALSE
chr1	36467405	36467680	276	*	mm10_rmsk	exon	749		Lx8	Lx8_dup710	L1	LINE	-3940	Cnnm4	ENSMUST00000153128.1	intergenic	intergenic	intergenic	-1.42998	2.54497	30.3924	7.90545e-07	5.76374e-05	0.121817	13.7403	15.9377	0.00141182	0.00306763	0	0	TRUE	TRUE	TRUE	FALSE	FALSE	FALSE
chr1	36486288	36486673	386	*	mm10_rmsk	exon	1539		MTC	MTC_dup367	ERVL-MaLR	LTR	12336	RP23-294I17.4	ENSMUST00000193157.1	intronic	intronic	gene_body	-1.25781	-1.46599	9.21234	0.00355492	0.0368455	-0.0712501	12.9646	7.63021	0.0156148	0.0261341	0	0	TRUE	FALSE	TRUE	FALSE	FALSE	FALSE
chr1	36511377	36511546	170	*	mm10_rmsk	exon	471		B3A	B3A_dup892	B2	SINE	-321	Cnnm3	ENSMUST00000001166.13	intergenic	proximal <=1000bp	Tss_prox_1kbp	-1.3793	2.78096	31.5009	5.42687e-07	4.36934e-05	-0.0693289	14.2699	6.57714	0.0228853	0.0371879	0	0	TRUE	TRUE	TRUE	TRUE	FALSE	TRUE
chr1	36513330	36513414	85	*	mm10_rmsk	exon	346		ID_B1	ID_B1_dup803	B4	SINE	233	Cnnm3	ENSMUST00000154225.1	intronic	proximal <=1000bp	Tss_prox_1kbp	-1.11257	-0.982872	12.5928	0.00076049	0.011709	-0.175808	14.6041	23.3246	0.000290382	0.000788684	0	0	FALSE	FALSE	FALSE	FALSE	FALSE	TRUE
chr1	36514115	36514125	11	*	mm10_rmsk	exon	1072		B1_Mus2	B1_Mus2_dup609	Alu	SINE	1018	Cnnm3	ENSMUST00000154225.1	intronic	intronic	gene_body	-1.35452	-1.57138	11.4408	0.00127145	0.0172909	-0.176162	13.8323	10.0652	0.00699884	0.0128811	0	0	FALSE	FALSE	FALSE	FALSE	FALSE	FALSE
chr1	36514160	36514292	133	*	mm10_rmsk	exon	1072		B1_Mus2	B1_Mus2_dup610	Alu	SINE	1063	Cnnm3	ENSMUST00000154225.1	intronic	intronic	gene_body	-1.19386	-0.949662	13.2595	0.000567671	0.00935787	-0.176162	13.8323	10.0652	0.00699884	0.0128811	0	0	FALSE	FALSE	FALSE	FALSE	FALSE	FALSE
chr1	36539825	36539925	101	*	mm10_rmsk	exon	469		B1F2	B1F2_dup134	Alu	SINE	396	RP23-294I17.8	ENSMUST00000207088.1	intronic	proximal <=1000bp	Tss_prox_1kbp	1.77095	-2.31663	9.90303	0.00257152	0.0291654	-0.209237	11.7791	21.8106	0.000389999	0.00100381	0	0	FALSE	FALSE	FALSE	TRUE	FALSE	FALSE
chr1	36595871	36595953	83	*	mm10_rmsk	exon	463		URR1B	URR1B_dup189	hAT-Charlie	DNA	2539	Fam178b	ENSMUST00000193763.5	intronic	intronic	gene_body	-1.41626	-2.00171	8.68814	0.00456062	0.0439309	0.0113244	11.7009	0.167068	0.689098	0.720655	0	0	FALSE	FALSE	FALSE	FALSE	FALSE	FALSE
chr1	36664078	36664216	139	*	mm10_rmsk	exon	1177		B1_Mus1	B1_Mus1_dup944	Alu	SINE	113	Gm24133	ENSMUST00000104746.1	intronic	proximal <=1000bp	Tss_prox_1kbp	-1.29483	-0.790062	17.9317	8.00515e-05	0.00201088	-0.146129	14.2108	8.59991	0.011203	0.0196492	0	0	TRUE	FALSE	TRUE	TRUE	FALSE	FALSE
chr1	36674634	36675012	379	*	mm10_rmsk	exon	13968		MERVL_2A-int	MERVL_2A-int_dup64	ERVL	LTR	-8171	Fam178b	ENSMUST00000114981.2	intronic	intronic	gene_body	-1.43819	-0.625337	25.5682	4.31828e-06	0.000205383	0.421914	10.1471	113.592	5.60901e-08	3.05101e-06	0	0	TRUE	FALSE	TRUE	FALSE	FALSE	FALSE
chr1	36675013	36675120	108	*	mm10_rmsk	exon	421		PB1D9	PB1D9_dup217	Alu	SINE	-8063	Fam178b	ENSMUST00000114981.2	intronic	intronic	gene_body	-1.40504	-0.32306	20.6544	2.72585e-05	0.000858128	-0.245535	12.562	18.2067	0.000833525	0.00193109	0	0	TRUE	TRUE	TRUE	TRUE	FALSE	FALSE
chr1	36690925	36691050	126	*	mm10_rmsk	exon	586		B1_Mur1	B1_Mur1_dup338	Alu	SINE	-399	Cox5b	ENSMUST00000081180.6	intergenic	proximal <=1000bp	Tss_prox_1kbp	-1.17818	1.3903	23.8578	8.08792e-06	0.000332948	-0.179663	13.0741	14.4372	0.00205038	0.00424761	0	0	TRUE	TRUE	TRUE	TRUE	FALSE	FALSE
chr1	36710273	36710453	181	*	mm10_rmsk	exon	235		MT2B	MT2B_dup123	ERVL	LTR	124	RP23-247A1.6	ENSMUST00000192873.2	exonic	proximal <=1000bp	Tss_prox_1kbp	-1.06937	0.997976	19.9298	3.61574e-05	0.00107009	-0.0168277	10.8487	0.294364	0.596222	0.64213	0	0	FALSE	FALSE	FALSE	TRUE	FALSE	TRUE
chr1	36710348	36710457	110	*	mm10_rmsk	exon	506		PB1D11	PB1D11_dup182	Alu	SINE	199	RP23-247A1.6	ENSMUST00000192873.2	exonic	proximal <=1000bp	Tss_prox_1kbp	-1.24711	0.823958	26.3048	3.30977e-06	0.000167633	-0.132222	11.5205	12.2101	0.00372224	0.00724381	0	0	FALSE	FALSE	FALSE	TRUE	FALSE	TRUE
chr1	36711579	36711759	181	*	mm10_rmsk	exon	885		URR1B	URR1B_dup191	hAT-Charlie	DNA	1430	RP23-247A1.6	ENSMUST00000192873.2	intronic	intronic	gene_body	-1.32415	-0.798862	18.2127	7.14816e-05	0.00183824	0.0113244	11.7009	0.167068	0.689098	0.720655	0	0	FALSE	FALSE	FALSE	TRUE	FALSE	FALSE
chr1	36729848	36729985	138	*	mm10_rmsk	exon	246		L1M4c	L1M4c_dup29	L1	LINE	-14370	RP23-247A1.6	ENSMUST00000193459.2	intronic	intronic	gene_body	-2.12046	-2.15384	14.3705	0.000351369	0.00643729	0.0547186	8.48219	1.8324	0.197928	0.246639	1.4727e-172	4.4977e-172	TRUE	FALSE	TRUE	FALSE	FALSE	FALSE
chr1	36758496	36758679	184	*	mm10_rmsk	exon	716		B3	B3_dup1299	B2	SINE	-3119	Zap70	ENSMUST00000027291.6	intergenic	intergenic	intergenic	-1.25265	-1.00984	12.5977	0.000758859	0.0116916	-0.0408682	15.0047	1.97967	0.18188	0.229711	0	0	TRUE	FALSE	TRUE	FALSE	FALSE	FALSE
chr1	36758684	36758822	139	*	mm10_rmsk	exon	542		ID_B1	ID_B1_dup827	B4	SINE	-2976	Zap70	ENSMUST00000027291.6	intergenic	intergenic	intergenic	-1.01227	-0.274513	14.8797	0.000282877	0.00542761	-0.175808	14.6041	23.3246	0.000290382	0.000788684	0	0	TRUE	TRUE	TRUE	FALSE	FALSE	FALSE
chr1	36758914	36758966	53	*	mm10_rmsk	exon	187		L2a	L2a_dup218	L2	LINE	-2832	Zap70	ENSMUST00000027291.6	intergenic	intergenic	intergenic	-1.3581	0.0802187	25.5691	4.3168e-06	0.000205321	-0.0983674	12.4255	17.964	0.000880133	0.00202232	0	0	TRUE	FALSE	TRUE	FALSE	FALSE	FALSE
chr1	36759480	36759837	358	*	mm10_rmsk	exon	1956		MT2B1	MT2B1_dup112	ERVL	LTR	-1961	Zap70	ENSMUST00000027291.6	intergenic	intergenic	intergenic	-1.07894	-0.397822	14.2586	0.000368603	0.00668419	0.312012	10.3235	94.5783	1.70124e-07	3.88507e-06	0	0	FALSE	FALSE	FALSE	FALSE	FALSE	FALSE
chr1	36784469	36784645	177	*	mm10_rmsk	exon	1277		B2_Mm2	B2_Mm2_dup808	B2	SINE	5485	Zap70	ENSMUST00000190128.1	intergenic	intergenic	intergenic	-1.04176	-0.0195748	15.0824	0.000259623	0.00507741	0.10167	14.026	5.41603	0.0359684	0.0559787	0	0	FALSE	FALSE	FALSE	FALSE	FALSE	FALSE
chr1	36784646	36784732	87	*	mm10_rmsk	exon	414		MER97b	MER97b_dup1	hAT-Tip100	DNA	5662	Zap70	ENSMUST00000190128.1	intergenic	intergenic	intergenic	-1.12043	-0.0392964	18.2386	7.0742e-05	0.00182268	-0.311672	3.61725	12.004	0.00394476	0.00762381	1.14827e-13	1.42587e-13	TRUE	FALSE	FALSE	FALSE	FALSE	FALSE
chr1	36785143	36785182	40	*	mm10_rmsk	exon	182		MIR	MIR_dup282	MIR	SINE	6159	Zap70	ENSMUST00000190128.1	intergenic	intergenic	intergenic	-1.65688	-0.15638	38.843	5.05081e-08	8.26258e-06	-0.0763741	12.8857	8.72251	0.0107557	0.0189413	0	0	FALSE	FALSE	FALSE	FALSE	FALSE	FALSE
chr1	36785654	36785805	152	*	mm10_rmsk	exon	684		B3	B3_dup1301	B2	SINE	6670	Zap70	ENSMUST00000190128.1	intergenic	intergenic	intergenic	-1.48243	-0.535352	26.3707	3.23239e-06	0.000164536	-0.0408682	15.0047	1.97967	0.18188	0.229711	0	0	TRUE	FALSE	TRUE	FALSE	FALSE	FALSE
chr1	36785851	36786052	202	*	mm10_rmsk	exon	874		ID_B1	ID_B1_dup829	B4	SINE	6867	Zap70	ENSMUST00000190128.1	intergenic	intergenic	intergenic	-1.56658	-0.346137	33.0036	3.28441e-07	3.04573e-05	-0.175808	14.6041	23.3246	0.000290382	0.000788684	0	0	TRUE	FALSE	TRUE	FALSE	FALSE	FALSE
chr1	36786055	36786115	61	*	mm10_rmsk	exon	283		PB1D10	PB1D10_dup545	Alu	SINE	7071	Zap70	ENSMUST00000190128.1	intergenic	intergenic	intergenic	-1.38672	-0.663537	21.4319	2.01965e-05	0.000676466	-0.196601	13.5951	25.3633	0.00019904	0.000578507	0	0	FALSE	FALSE	FALSE	FALSE	FALSE	FALSE
chr1	36786512	36786711	200	*	mm10_rmsk	exon	818		B3A	B3A_dup912	B2	SINE	7528	Zap70	ENSMUST00000190128.1	intergenic	intergenic	intergenic	-1.02378	1.08882	18.8779	5.47816e-05	0.001488	-0.0693289	14.2699	6.57714	0.0228853	0.0371879	0	0	TRUE	TRUE	TRUE	FALSE	FALSE	TRUE
chr1	36890219	36890427	209	*	mm10_rmsk	exon	1059		B3	B3_dup1314	B2	SINE	18174	RP23-328J8.4	ENSMUST00000192008.1	intronic	intronic	gene_body	-1.59322	-1.87962	11.2951	0.00135792	0.0181713	-0.0408682	15.0047	1.97967	0.18188	0.229711	0	0	FALSE	FALSE	FALSE	FALSE	FALSE	FALSE
chr1	36897183	36897474	292	*	mm10_rmsk	exon	970		RLTR19-int	RLTR19-int_dup31	ERVK	LTR	-19065	RP23-328J8.2	ENSMUST00000194317.1	intronic	intronic	gene_body	-1.83134	-2.08788	12.426	0.000818703	0.0123861	0.0935097	9.09847	12.6633	0.00328211	0.0064774	1.12529e-304	5.19013e-304	FALSE	FALSE	FALSE	FALSE	FALSE	FALSE
chr1	36902181	36902300	120	*	mm10_rmsk	exon	933		B1_Mus1	B1_Mus1_dup965	Alu	SINE	-14239	RP23-328J8.2	ENSMUST00000194317.1	intronic	intronic	gene_body	-2.09283	-2.63004	9.27838	0.0034458	0.0360281	-0.146129	14.2108	8.59991	0.011203	0.0196492	0	0	FALSE	FALSE	FALSE	FALSE	FALSE	FALSE
chr1	36907608	36908361	754	*	mm10_rmsk	exon	511		L1M4	L1M4_dup181	L1	LINE	-8178	RP23-328J8.2	ENSMUST00000194317.1	intronic	intronic	gene_body	-1.24196	-0.220289	19.946	3.59282e-05	0.00106484	0.0357156	11.0706	1.17363	0.297501	0.350425	0	0	TRUE	FALSE	TRUE	FALSE	FALSE	FALSE
chr1	36958592	36958662	71	*	mm10_rmsk	exon	277		PB1D10	PB1D10_dup560	Alu	SINE	165	Rpl12-ps1	ENSMUST00000116168.3	intergenic	proximal <=1000bp	Tss_prox_1kbp	-1.79123	-1.50875	19.566	4.17151e-05	0.001198	-0.196601	13.5951	25.3633	0.00019904	0.000578507	0	0	FALSE	FALSE	FALSE	FALSE	FALSE	FALSE
chr1	36958744	36958819	76	*	mm10_rmsk	exon	187		MIR	MIR_dup283	MIR	SINE	317	Rpl12-ps1	ENSMUST00000116168.3	intergenic	proximal <=1000bp	Tss_prox_1kbp	-1.19394	-1.34505	9.32684	0.00336797	0.0354501	-0.0763741	12.8857	8.72251	0.0107557	0.0189413	0	0	FALSE	FALSE	FALSE	FALSE	FALSE	FALSE
chr1	36961488	36961632	145	*	mm10_rmsk	exon	1235		B1_Mus1	B1_Mus1_dup969	Alu	SINE	3061	Rpl12-ps1	ENSMUST00000116168.3	intergenic	intergenic	intergenic	-1.44522	-1.4947	12.5167	0.000786495	0.0120157	-0.146129	14.2108	8.59991	0.011203	0.0196492	0	0	TRUE	FALSE	TRUE	FALSE	FALSE	FALSE
chr1	36961633	36961730	98	*	mm10_rmsk	exon	579		B3	B3_dup1323	B2	SINE	3206	Rpl12-ps1	ENSMUST00000116168.3	intergenic	intergenic	intergenic	-1.79859	-1.45332	18.6348	6.03568e-05	0.00160498	-0.0408682	15.0047	1.97967	0.18188	0.229711	0	0	TRUE	FALSE	TRUE	FALSE	FALSE	FALSE
chr1	36971427	36971629	203	*	mm10_rmsk	exon	601		B3A	B3A_dup927	B2	SINE	13000	Rpl12-ps1	ENSMUST00000116168.3	intergenic	intergenic	intergenic	-1.29845	-1.61441	10.8212	0.00168421	0.0213241	-0.0693289	14.2699	6.57714	0.0228853	0.0371879	0	0	FALSE	FALSE	FALSE	FALSE	FALSE	FALSE
chr1	36971640	36971787	148	*	mm10_rmsk	exon	580		B1_Mur1	B1_Mur1_dup342	Alu	SINE	13213	Rpl12-ps1	ENSMUST00000116168.3	intergenic	intergenic	intergenic	-1.53131	0.26387	31.3536	5.70349e-07	4.53003e-05	-0.179663	13.0741	14.4372	0.00205038	0.00424761	0	0	TRUE	TRUE	TRUE	FALSE	FALSE	FALSE
chr1	36971806	36971981	176	*	mm10_rmsk	exon	653		B3A	B3A_dup928	B2	SINE	13379	Rpl12-ps1	ENSMUST00000116168.3	intergenic	intergenic	intergenic	-1.37534	-0.137595	26.9652	2.61322e-06	0.000139783	-0.0693289	14.2699	6.57714	0.0228853	0.0371879	0	0	TRUE	TRUE	TRUE	FALSE	FALSE	FALSE
chr1	36981730	36982019	290	*	mm10_rmsk	exon	538		L1MD2	L1MD2_dup54	L1	LINE	23303	Rpl12-ps1	ENSMUST00000116168.3	intergenic	intergenic	intergenic	-1.54744	-2.01684	8.86037	0.0042008	0.0414736	0.13475	9.16293	21.9494	0.00037939	0.000985005	7.50726e-291	3.31375e-290	TRUE	FALSE	TRUE	FALSE	FALSE	FALSE
chr1	36987673	36988038	366	*	mm10_rmsk	exon	748		MTE2a	MTE2a_dup180	ERVL-MaLR	LTR	-17401	n-R5s210	ENSMUST00000177688.1	intergenic	intergenic	intergenic	-1.47254	-1.23599	16.4563	0.000146236	0.00323192	-0.169323	12.136	28.5191	0.000115331	0.000368901	0	0	TRUE	FALSE	TRUE	FALSE	FALSE	FALSE
chr1	36996961	36997051	91	*	mm10_rmsk	exon	225		PB1D10	PB1D10_dup564	Alu	SINE	-8388	n-R5s210	ENSMUST00000177688.1	intergenic	intergenic	intergenic	-1.3338	-1.46099	11.4911	0.00124293	0.0170054	-0.196601	13.5951	25.3633	0.00019904	0.000578507	0	0	TRUE	FALSE	TRUE	FALSE	FALSE	FALSE
chr1	37018466	37018638	173	*	mm10_rmsk	exon	625		Lx8	Lx8_dup726	L1	LINE	-7958	Vwa3b	ENSMUST00000117172.8	intergenic	intergenic	intergenic	-1.18428	-1.40458	10.8776	0.00164139	0.0209212	0.121817	13.7403	15.9377	0.00141182	0.00306763	0	0	FALSE	FALSE	FALSE	FALSE	FALSE	FALSE
chr1	37038439	37038790	352	*	mm10_rmsk	exon	2215		RLTR10D	RLTR10D_dup7	ERVK	LTR	2731	Vwa3b	ENSMUST00000027289.13	intronic	intronic	gene_body	1.55421	-2.38743	8.5603	0.00484851	0.0458821	-0.342047	8.59177	5.74839	0.0368019	0.057117	4.93863e-174	1.51648e-173	FALSE	FALSE	FALSE	FALSE	FALSE	FALSE
chr1	37042458	37042596	139	*	mm10_rmsk	exon	886		B1_Mus2	B1_Mus2_dup638	Alu	SINE	6750	Vwa3b	ENSMUST00000027289.13	intronic	intronic	gene_body	-1.50872	-0.640312	21.3023	2.12267e-05	0.000704091	-0.176162	13.8323	10.0652	0.00699884	0.0128811	0	0	TRUE	FALSE	TRUE	FALSE	FALSE	FALSE
chr1	37075893	37076022	130	*	mm10_rmsk	exon	311		MLT1J	MLT1J_dup25	ERVL-MaLR	LTR	-24509	Vwa3b	ENSMUST00000194890.1	intronic	intronic	gene_body	-1.23696	2.2628	23.2807	1.00274e-05	0.000392764	-0.279311	9.60638	95.1969	1.636e-07	3.88507e-06	0	0	TRUE	TRUE	TRUE	FALSE	FALSE	TRUE
chr1	37197085	37197295	211	*	mm10_rmsk	exon	1094		URR1A	URR1A_dup155	hAT-Charlie	DNA	10230	Vwa3b	ENSMUST00000194320.1	intergenic	intergenic	intergenic	-1.30868	-0.984949	16.794	0.00012724	0.00289526	0.141989	11.6467	21.3016	0.00043195	0.00108863	0	0	FALSE	FALSE	FALSE	FALSE	FALSE	FALSE
chr1	37197512	37197620	109	*	mm10_rmsk	exon	192		L2b	L2b_dup86	L2	LINE	10657	Vwa3b	ENSMUST00000194320.1	intergenic	intergenic	intergenic	-1.80764	-0.52176	40.3671	3.15886e-08	6.01837e-06	-0.157819	11.6429	35.8181	3.78304e-05	0.000148015	0	0	TRUE	FALSE	TRUE	FALSE	FALSE	FALSE
chr1	37198183	37198351	169	*	mm10_rmsk	exon	912		B3	B3_dup1342	B2	SINE	11328	Vwa3b	ENSMUST00000194320.1	intergenic	intergenic	intergenic	-1.34413	-1.84192	9.25722	0.00348036	0.0362839	-0.0408682	15.0047	1.97967	0.18188	0.229711	0	0	FALSE	FALSE	FALSE	FALSE	FALSE	FALSE
chr1	37212249	37212382	134	*	mm10_rmsk	exon	322		B1F	B1F_dup395	Alu	SINE	-2052	Cnga3	ENSMUST00000191981.5	intergenic	intergenic	intergenic	-1.40303	-0.0984758	28.3375	1.60924e-06	9.72227e-05	-0.210784	13.2074	26.2569	0.000169765	0.00050658	0	0	FALSE	FALSE	FALSE	FALSE	FALSE	FALSE
chr1	37212481	37212578	98	*	mm10_rmsk	exon	549		B1_Mur2	B1_Mur2_dup274	Alu	SINE	-1856	Cnga3	ENSMUST00000191981.5	intergenic	intergenic	intergenic	-1.42735	1.58533	33.2117	3.06582e-07	2.89367e-05	-0.133884	12.7428	10.2743	0.00656262	0.0121381	0	0	TRUE	TRUE	TRUE	FALSE	FALSE	FALSE
chr1	37213010	37213053	44	*	mm10_rmsk	exon	269		PB1D9	PB1D9_dup226	Alu	SINE	-1381	Cnga3	ENSMUST00000191981.5	intergenic	intergenic	intergenic	-2.05547	-1.3317	25.1242	5.07536e-06	0.000232404	-0.245535	12.562	18.2067	0.000833525	0.00193109	0	0	FALSE	FALSE	FALSE	FALSE	FALSE	FALSE
chr1	37230972	37231101	130	*	mm10_rmsk	exon	527		B1F2	B1F2_dup142	Alu	SINE	11767	Cnga3	ENSMUST00000027288.9	intronic	intronic	gene_body	-1.60881	-1.9909	10.7537	0.00173697	0.0218231	-0.209237	11.7791	21.8106	0.000389999	0.00100381	0	0	TRUE	FALSE	TRUE	FALSE	FALSE	FALSE
chr1	37234966	37235296	331	*	mm10_rmsk	exon	671		MTEa	MTEa_dup229	ERVL-MaLR	LTR	15761	Cnga3	ENSMUST00000027288.9	intronic	intronic	gene_body	-1.4385	0.58078	33.5884	2.70771e-07	2.65348e-05	-0.2922	12.679	58.9166	2.66017e-06	2.14153e-05	0	0	TRUE	TRUE	TRUE	FALSE	TRUE	FALSE
chr1	37237805	37238172	368	*	mm10_rmsk	exon	1539		MLTR14	MLTR14_dup102	ERV1	LTR	18600	Cnga3	ENSMUST00000027288.9	intronic	intronic	gene_body	-1.41699	0.419728	32.7898	3.52574e-07	3.20023e-05	-0.0952499	10.955	14.6774	0.00192872	0.00404165	0	0	TRUE	TRUE	TRUE	FALSE	FALSE	FALSE
chr1	37246268	37246302	35	*	mm10_rmsk	exon	484		B4	B4_dup626	B4	SINE	27063	Cnga3	ENSMUST00000027288.9	intronic	intronic	gene_body	-1.4249	-1.33198	15.0373	0.000264618	0.00515406	0.0559679	13.6316	3.88846	0.0693232	0.0998362	0	0	FALSE	FALSE	FALSE	FALSE	FALSE	FALSE
chr1	37246303	37246414	112	*	mm10_rmsk	exon	246		B1_Mur1	B1_Mur1_dup344	Alu	SINE	27098	Cnga3	ENSMUST00000027288.9	intronic	intronic	gene_body	-1.22447	-0.250411	16.4865	0.000144425	0.00319963	-0.179663	13.0741	14.4372	0.00205038	0.00424761	0	0	FALSE	FALSE	FALSE	FALSE	FALSE	FALSE
[truncated: 64,149 more rows]

## Sheet: TF_LINE_positive_adult_SC
Model	Transcription factor	Model length	Data source	TF family	TF subfamily	MGI	EntrezGene	UniProt ID	UniProt AC	Consensus	P-value	Log P-value	q-value (Benjamini)	# of Target Sequences with Motif(of 5232)	% of Target Sequences with Motif	# of Background Sequences with Motif(of 102684)	% of Background Sequences with Motif	MotifFind-Offset	MotifFind-Sequence	MotifFind-Strand	MotifFind-MotifScore	PositionID	seqnames	start	end	width	strand	source	type	score	phase	gene_id	family_id	class_id	distance2nearestTSS	nearestTSS-gene_name	nearestTSS	overlap	class	class_n	logFC	logCPM	F	PValue	qvalue	class_family	genomeAnno_class	genomeAnno_class_family	genomeAnno_class_gene
[truncated: 194 more rows]
[truncated: 1 more columns]

[truncated: 1 more sheets: TF_LTR_negative_adult_SC]
